# Supplementary material for: Comparative transcriptomics provides a strategy for phylogenetic analysis and SSR marker development in Chaenomeles
Source: Sci Rep. 2021 Aug 12;11:16441. doi: 10.1038/s41598-021-95776-z (PMC8361139; doi:10.1038/s41598-021-95776-z)
Supplement: Supplementary file 2 — Supplementary Table S1. [file 41598_2021_95776_MOESM2_ESM.xlsx]

## Sheet: Supplementary Table S1
Assembled genes in 11 germplasms
XZ	DY	ZPLP	GP	MYXZ	MY	RB	XZSS	ZPCA	ZPXC	ZPLY
ORTHOMCL0	ORTHOMCL0	ORTHOMCL0	ORTHOMCL0	ORTHOMCL0	ORTHOMCL0	ORTHOMCL0	ORTHOMCL0	ORTHOMCL0	ORTHOMCL0	ORTHOMCL0
ORTHOMCL1	ORTHOMCL1	ORTHOMCL1	ORTHOMCL1	ORTHOMCL1	ORTHOMCL1	ORTHOMCL1	ORTHOMCL1	ORTHOMCL1	ORTHOMCL1	ORTHOMCL1
ORTHOMCL2	ORTHOMCL2	ORTHOMCL2	ORTHOMCL2	ORTHOMCL2	ORTHOMCL2	ORTHOMCL2	ORTHOMCL2	ORTHOMCL2	ORTHOMCL2	ORTHOMCL2
ORTHOMCL3	ORTHOMCL3	ORTHOMCL3	ORTHOMCL3	ORTHOMCL3	ORTHOMCL3	ORTHOMCL3	ORTHOMCL3	ORTHOMCL3	ORTHOMCL3	ORTHOMCL3
ORTHOMCL4	ORTHOMCL4	ORTHOMCL4	ORTHOMCL4	ORTHOMCL4	ORTHOMCL4	ORTHOMCL4	ORTHOMCL4	ORTHOMCL4	ORTHOMCL4	ORTHOMCL4
ORTHOMCL5	ORTHOMCL5	ORTHOMCL5	ORTHOMCL5	ORTHOMCL5	ORTHOMCL5	ORTHOMCL5	ORTHOMCL5	ORTHOMCL5	ORTHOMCL5	ORTHOMCL5
ORTHOMCL6	ORTHOMCL6	ORTHOMCL6	ORTHOMCL6	ORTHOMCL6	ORTHOMCL6	ORTHOMCL6	ORTHOMCL6	ORTHOMCL6	ORTHOMCL6	ORTHOMCL6
ORTHOMCL7	ORTHOMCL7	ORTHOMCL7	ORTHOMCL7	ORTHOMCL7	ORTHOMCL7	ORTHOMCL7	ORTHOMCL7	ORTHOMCL7	ORTHOMCL7	ORTHOMCL7
ORTHOMCL8	ORTHOMCL8	ORTHOMCL8	ORTHOMCL8	ORTHOMCL8	ORTHOMCL8	ORTHOMCL8	ORTHOMCL8	ORTHOMCL8	ORTHOMCL8	ORTHOMCL8
ORTHOMCL9	ORTHOMCL9	ORTHOMCL9	ORTHOMCL9	ORTHOMCL9	ORTHOMCL9	ORTHOMCL9	ORTHOMCL9	ORTHOMCL9	ORTHOMCL9	ORTHOMCL9
ORTHOMCL10	ORTHOMCL10	ORTHOMCL10	ORTHOMCL10	ORTHOMCL10	ORTHOMCL10	ORTHOMCL10	ORTHOMCL10	ORTHOMCL10	ORTHOMCL10	ORTHOMCL10
ORTHOMCL11	ORTHOMCL11	ORTHOMCL11	ORTHOMCL11	ORTHOMCL11	ORTHOMCL11	ORTHOMCL11	ORTHOMCL11	ORTHOMCL11	ORTHOMCL11	ORTHOMCL11
ORTHOMCL12	ORTHOMCL12	ORTHOMCL12	ORTHOMCL12	ORTHOMCL12	ORTHOMCL12	ORTHOMCL12	ORTHOMCL12	ORTHOMCL12	ORTHOMCL12	ORTHOMCL12
ORTHOMCL13	ORTHOMCL13	ORTHOMCL13	ORTHOMCL13	ORTHOMCL13	ORTHOMCL13	ORTHOMCL13	ORTHOMCL13	ORTHOMCL13	ORTHOMCL13	ORTHOMCL13
ORTHOMCL14	ORTHOMCL14	ORTHOMCL14	ORTHOMCL14	ORTHOMCL14	ORTHOMCL14	ORTHOMCL14	ORTHOMCL14	ORTHOMCL14	ORTHOMCL14	ORTHOMCL14
ORTHOMCL15	ORTHOMCL15	ORTHOMCL15	ORTHOMCL15	ORTHOMCL15	ORTHOMCL15	ORTHOMCL15	ORTHOMCL15	ORTHOMCL15	ORTHOMCL15	ORTHOMCL15
ORTHOMCL16	ORTHOMCL16	ORTHOMCL16	ORTHOMCL16	ORTHOMCL16	ORTHOMCL16	ORTHOMCL16	ORTHOMCL16	ORTHOMCL16	ORTHOMCL16	ORTHOMCL16
ORTHOMCL17	ORTHOMCL17	ORTHOMCL17	ORTHOMCL17	ORTHOMCL17	ORTHOMCL17	ORTHOMCL17	ORTHOMCL17	ORTHOMCL17	ORTHOMCL17	ORTHOMCL17
ORTHOMCL18	ORTHOMCL18	ORTHOMCL18	ORTHOMCL18	ORTHOMCL18	ORTHOMCL18	ORTHOMCL18	ORTHOMCL18	ORTHOMCL18	ORTHOMCL18	ORTHOMCL18
ORTHOMCL19	ORTHOMCL19	ORTHOMCL19	ORTHOMCL19	ORTHOMCL19	ORTHOMCL19	ORTHOMCL19	ORTHOMCL19	ORTHOMCL19	ORTHOMCL19	ORTHOMCL19
ORTHOMCL20	ORTHOMCL20	ORTHOMCL20	ORTHOMCL20	ORTHOMCL20	ORTHOMCL20	ORTHOMCL20	ORTHOMCL20	ORTHOMCL20	ORTHOMCL20	ORTHOMCL20
ORTHOMCL21	ORTHOMCL21	ORTHOMCL21	ORTHOMCL21	ORTHOMCL21	ORTHOMCL21	ORTHOMCL21	ORTHOMCL21	ORTHOMCL21	ORTHOMCL21	ORTHOMCL21
ORTHOMCL22	ORTHOMCL22	ORTHOMCL22	ORTHOMCL22	ORTHOMCL22	ORTHOMCL22	ORTHOMCL22	ORTHOMCL22	ORTHOMCL22	ORTHOMCL22	ORTHOMCL22
ORTHOMCL23	ORTHOMCL23	ORTHOMCL23	ORTHOMCL23	ORTHOMCL23	ORTHOMCL23	ORTHOMCL23	ORTHOMCL23	ORTHOMCL23	ORTHOMCL23	ORTHOMCL23
ORTHOMCL24	ORTHOMCL24	ORTHOMCL24	ORTHOMCL24	ORTHOMCL24	ORTHOMCL24	ORTHOMCL24	ORTHOMCL24	ORTHOMCL24	ORTHOMCL24	ORTHOMCL24
ORTHOMCL25	ORTHOMCL25	ORTHOMCL25	ORTHOMCL25	ORTHOMCL25	ORTHOMCL25	ORTHOMCL25	ORTHOMCL25	ORTHOMCL25	ORTHOMCL25	ORTHOMCL25
ORTHOMCL26	ORTHOMCL26	ORTHOMCL26	ORTHOMCL26	ORTHOMCL26	ORTHOMCL26	ORTHOMCL26	ORTHOMCL26	ORTHOMCL26	ORTHOMCL26	ORTHOMCL26
ORTHOMCL27	ORTHOMCL27	ORTHOMCL27	ORTHOMCL27	ORTHOMCL27	ORTHOMCL27	ORTHOMCL27	ORTHOMCL27	ORTHOMCL27	ORTHOMCL27	ORTHOMCL27
ORTHOMCL28	ORTHOMCL28	ORTHOMCL28	ORTHOMCL28	ORTHOMCL28	ORTHOMCL28	ORTHOMCL28	ORTHOMCL28	ORTHOMCL28	ORTHOMCL28	ORTHOMCL28
ORTHOMCL29	ORTHOMCL29	ORTHOMCL29	ORTHOMCL29	ORTHOMCL29	ORTHOMCL29	ORTHOMCL29	ORTHOMCL29	ORTHOMCL29	ORTHOMCL29	ORTHOMCL29
ORTHOMCL30	ORTHOMCL30	ORTHOMCL30	ORTHOMCL30	ORTHOMCL30	ORTHOMCL30	ORTHOMCL30	ORTHOMCL30	ORTHOMCL30	ORTHOMCL30	ORTHOMCL30
ORTHOMCL31	ORTHOMCL31	ORTHOMCL31	ORTHOMCL31	ORTHOMCL31	ORTHOMCL31	ORTHOMCL31	ORTHOMCL31	ORTHOMCL31	ORTHOMCL31	ORTHOMCL31
ORTHOMCL32	ORTHOMCL32	ORTHOMCL32	ORTHOMCL32	ORTHOMCL32	ORTHOMCL32	ORTHOMCL32	ORTHOMCL32	ORTHOMCL32	ORTHOMCL32	ORTHOMCL32
ORTHOMCL33	ORTHOMCL33	ORTHOMCL33	ORTHOMCL33	ORTHOMCL33	ORTHOMCL33	ORTHOMCL33	ORTHOMCL33	ORTHOMCL33	ORTHOMCL33	ORTHOMCL33
ORTHOMCL34	ORTHOMCL34	ORTHOMCL34	ORTHOMCL34	ORTHOMCL34	ORTHOMCL34	ORTHOMCL34	ORTHOMCL34	ORTHOMCL34	ORTHOMCL34	ORTHOMCL34
ORTHOMCL35	ORTHOMCL35	ORTHOMCL35	ORTHOMCL35	ORTHOMCL35	ORTHOMCL35	ORTHOMCL35	ORTHOMCL35	ORTHOMCL35	ORTHOMCL35	ORTHOMCL35
ORTHOMCL36	ORTHOMCL36	ORTHOMCL36	ORTHOMCL36	ORTHOMCL36	ORTHOMCL36	ORTHOMCL36	ORTHOMCL36	ORTHOMCL36	ORTHOMCL36	ORTHOMCL36
ORTHOMCL37	ORTHOMCL37	ORTHOMCL37	ORTHOMCL37	ORTHOMCL37	ORTHOMCL37	ORTHOMCL37	ORTHOMCL37	ORTHOMCL37	ORTHOMCL37	ORTHOMCL37
ORTHOMCL38	ORTHOMCL38	ORTHOMCL38	ORTHOMCL38	ORTHOMCL38	ORTHOMCL38	ORTHOMCL38	ORTHOMCL38	ORTHOMCL38	ORTHOMCL38	ORTHOMCL38
ORTHOMCL39	ORTHOMCL39	ORTHOMCL39	ORTHOMCL39	ORTHOMCL39	ORTHOMCL39	ORTHOMCL39	ORTHOMCL39	ORTHOMCL39	ORTHOMCL39	ORTHOMCL39
ORTHOMCL40	ORTHOMCL40	ORTHOMCL40	ORTHOMCL40	ORTHOMCL40	ORTHOMCL40	ORTHOMCL40	ORTHOMCL40	ORTHOMCL40	ORTHOMCL40	ORTHOMCL40
ORTHOMCL41	ORTHOMCL41	ORTHOMCL41	ORTHOMCL41	ORTHOMCL41	ORTHOMCL41	ORTHOMCL41	ORTHOMCL41	ORTHOMCL41	ORTHOMCL41	ORTHOMCL41
ORTHOMCL42	ORTHOMCL42	ORTHOMCL42	ORTHOMCL42	ORTHOMCL42	ORTHOMCL42	ORTHOMCL42	ORTHOMCL42	ORTHOMCL42	ORTHOMCL42	ORTHOMCL42
ORTHOMCL43	ORTHOMCL43	ORTHOMCL43	ORTHOMCL43	ORTHOMCL43	ORTHOMCL43	ORTHOMCL43	ORTHOMCL43	ORTHOMCL43	ORTHOMCL43	ORTHOMCL43
ORTHOMCL44	ORTHOMCL44	ORTHOMCL44	ORTHOMCL44	ORTHOMCL44	ORTHOMCL44	ORTHOMCL44	ORTHOMCL44	ORTHOMCL44	ORTHOMCL44	ORTHOMCL44
ORTHOMCL45	ORTHOMCL45	ORTHOMCL45	ORTHOMCL45	ORTHOMCL45	ORTHOMCL45	ORTHOMCL45	ORTHOMCL45	ORTHOMCL45	ORTHOMCL45	ORTHOMCL45
ORTHOMCL46	ORTHOMCL46	ORTHOMCL46	ORTHOMCL46	ORTHOMCL46	ORTHOMCL46	ORTHOMCL46	ORTHOMCL46	ORTHOMCL46	ORTHOMCL46	ORTHOMCL46
ORTHOMCL47	ORTHOMCL47	ORTHOMCL47	ORTHOMCL47	ORTHOMCL47	ORTHOMCL47	ORTHOMCL47	ORTHOMCL47	ORTHOMCL47	ORTHOMCL47	ORTHOMCL47
ORTHOMCL48	ORTHOMCL48	ORTHOMCL48	ORTHOMCL48	ORTHOMCL48	ORTHOMCL48	ORTHOMCL48	ORTHOMCL48	ORTHOMCL48	ORTHOMCL48	ORTHOMCL48
ORTHOMCL49	ORTHOMCL49	ORTHOMCL49	ORTHOMCL49	ORTHOMCL49	ORTHOMCL49	ORTHOMCL49	ORTHOMCL49	ORTHOMCL49	ORTHOMCL49	ORTHOMCL49
ORTHOMCL50	ORTHOMCL50	ORTHOMCL50	ORTHOMCL50	ORTHOMCL50	ORTHOMCL50	ORTHOMCL50	ORTHOMCL50	ORTHOMCL50	ORTHOMCL50	ORTHOMCL50
ORTHOMCL51	ORTHOMCL51	ORTHOMCL51	ORTHOMCL52	ORTHOMCL51	ORTHOMCL51	ORTHOMCL51	ORTHOMCL51	ORTHOMCL51	ORTHOMCL51	ORTHOMCL51
ORTHOMCL52	ORTHOMCL52	ORTHOMCL52	ORTHOMCL53	ORTHOMCL52	ORTHOMCL52	ORTHOMCL52	ORTHOMCL52	ORTHOMCL52	ORTHOMCL52	ORTHOMCL52
ORTHOMCL53	ORTHOMCL53	ORTHOMCL53	ORTHOMCL54	ORTHOMCL53	ORTHOMCL53	ORTHOMCL53	ORTHOMCL53	ORTHOMCL53	ORTHOMCL53	ORTHOMCL53
ORTHOMCL54	ORTHOMCL54	ORTHOMCL54	ORTHOMCL55	ORTHOMCL54	ORTHOMCL54	ORTHOMCL54	ORTHOMCL54	ORTHOMCL54	ORTHOMCL54	ORTHOMCL54
ORTHOMCL55	ORTHOMCL55	ORTHOMCL55	ORTHOMCL56	ORTHOMCL55	ORTHOMCL55	ORTHOMCL55	ORTHOMCL55	ORTHOMCL55	ORTHOMCL55	ORTHOMCL55
ORTHOMCL56	ORTHOMCL56	ORTHOMCL56	ORTHOMCL57	ORTHOMCL56	ORTHOMCL56	ORTHOMCL56	ORTHOMCL56	ORTHOMCL56	ORTHOMCL56	ORTHOMCL56
ORTHOMCL57	ORTHOMCL57	ORTHOMCL57	ORTHOMCL58	ORTHOMCL57	ORTHOMCL57	ORTHOMCL57	ORTHOMCL57	ORTHOMCL57	ORTHOMCL57	ORTHOMCL57
ORTHOMCL58	ORTHOMCL59	ORTHOMCL58	ORTHOMCL59	ORTHOMCL58	ORTHOMCL58	ORTHOMCL58	ORTHOMCL58	ORTHOMCL58	ORTHOMCL58	ORTHOMCL58
ORTHOMCL59	ORTHOMCL60	ORTHOMCL59	ORTHOMCL60	ORTHOMCL59	ORTHOMCL59	ORTHOMCL59	ORTHOMCL59	ORTHOMCL59	ORTHOMCL59	ORTHOMCL59
ORTHOMCL60	ORTHOMCL61	ORTHOMCL60	ORTHOMCL61	ORTHOMCL60	ORTHOMCL60	ORTHOMCL60	ORTHOMCL60	ORTHOMCL60	ORTHOMCL60	ORTHOMCL60
ORTHOMCL61	ORTHOMCL62	ORTHOMCL61	ORTHOMCL62	ORTHOMCL61	ORTHOMCL61	ORTHOMCL61	ORTHOMCL61	ORTHOMCL61	ORTHOMCL61	ORTHOMCL61
ORTHOMCL62	ORTHOMCL63	ORTHOMCL62	ORTHOMCL63	ORTHOMCL62	ORTHOMCL62	ORTHOMCL62	ORTHOMCL62	ORTHOMCL62	ORTHOMCL62	ORTHOMCL62
ORTHOMCL63	ORTHOMCL64	ORTHOMCL63	ORTHOMCL65	ORTHOMCL63	ORTHOMCL63	ORTHOMCL63	ORTHOMCL63	ORTHOMCL63	ORTHOMCL63	ORTHOMCL63
ORTHOMCL64	ORTHOMCL65	ORTHOMCL64	ORTHOMCL66	ORTHOMCL64	ORTHOMCL64	ORTHOMCL64	ORTHOMCL64	ORTHOMCL64	ORTHOMCL64	ORTHOMCL64
ORTHOMCL65	ORTHOMCL66	ORTHOMCL65	ORTHOMCL67	ORTHOMCL65	ORTHOMCL65	ORTHOMCL65	ORTHOMCL65	ORTHOMCL65	ORTHOMCL65	ORTHOMCL65
ORTHOMCL66	ORTHOMCL67	ORTHOMCL66	ORTHOMCL68	ORTHOMCL66	ORTHOMCL66	ORTHOMCL66	ORTHOMCL66	ORTHOMCL66	ORTHOMCL66	ORTHOMCL66
ORTHOMCL67	ORTHOMCL68	ORTHOMCL67	ORTHOMCL69	ORTHOMCL67	ORTHOMCL67	ORTHOMCL67	ORTHOMCL67	ORTHOMCL67	ORTHOMCL67	ORTHOMCL67
ORTHOMCL68	ORTHOMCL69	ORTHOMCL68	ORTHOMCL70	ORTHOMCL68	ORTHOMCL68	ORTHOMCL68	ORTHOMCL68	ORTHOMCL68	ORTHOMCL68	ORTHOMCL68
ORTHOMCL69	ORTHOMCL70	ORTHOMCL69	ORTHOMCL71	ORTHOMCL69	ORTHOMCL69	ORTHOMCL69	ORTHOMCL69	ORTHOMCL69	ORTHOMCL69	ORTHOMCL69
ORTHOMCL70	ORTHOMCL71	ORTHOMCL70	ORTHOMCL72	ORTHOMCL70	ORTHOMCL70	ORTHOMCL70	ORTHOMCL70	ORTHOMCL70	ORTHOMCL70	ORTHOMCL70
ORTHOMCL71	ORTHOMCL72	ORTHOMCL71	ORTHOMCL73	ORTHOMCL71	ORTHOMCL71	ORTHOMCL71	ORTHOMCL71	ORTHOMCL71	ORTHOMCL72	ORTHOMCL71
ORTHOMCL72	ORTHOMCL73	ORTHOMCL72	ORTHOMCL74	ORTHOMCL72	ORTHOMCL72	ORTHOMCL72	ORTHOMCL72	ORTHOMCL72	ORTHOMCL73	ORTHOMCL72
ORTHOMCL73	ORTHOMCL74	ORTHOMCL73	ORTHOMCL75	ORTHOMCL73	ORTHOMCL73	ORTHOMCL73	ORTHOMCL73	ORTHOMCL73	ORTHOMCL74	ORTHOMCL73
ORTHOMCL74	ORTHOMCL75	ORTHOMCL74	ORTHOMCL76	ORTHOMCL74	ORTHOMCL74	ORTHOMCL74	ORTHOMCL74	ORTHOMCL74	ORTHOMCL76	ORTHOMCL74
ORTHOMCL75	ORTHOMCL76	ORTHOMCL76	ORTHOMCL77	ORTHOMCL75	ORTHOMCL75	ORTHOMCL75	ORTHOMCL75	ORTHOMCL76	ORTHOMCL77	ORTHOMCL75
ORTHOMCL76	ORTHOMCL77	ORTHOMCL77	ORTHOMCL78	ORTHOMCL76	ORTHOMCL76	ORTHOMCL76	ORTHOMCL76	ORTHOMCL77	ORTHOMCL78	ORTHOMCL76
ORTHOMCL77	ORTHOMCL78	ORTHOMCL78	ORTHOMCL79	ORTHOMCL77	ORTHOMCL77	ORTHOMCL77	ORTHOMCL77	ORTHOMCL78	ORTHOMCL79	ORTHOMCL77
ORTHOMCL78	ORTHOMCL79	ORTHOMCL79	ORTHOMCL80	ORTHOMCL78	ORTHOMCL78	ORTHOMCL78	ORTHOMCL78	ORTHOMCL79	ORTHOMCL80	ORTHOMCL78
ORTHOMCL79	ORTHOMCL80	ORTHOMCL80	ORTHOMCL81	ORTHOMCL79	ORTHOMCL79	ORTHOMCL79	ORTHOMCL79	ORTHOMCL80	ORTHOMCL81	ORTHOMCL79
ORTHOMCL80	ORTHOMCL81	ORTHOMCL81	ORTHOMCL82	ORTHOMCL80	ORTHOMCL80	ORTHOMCL80	ORTHOMCL80	ORTHOMCL81	ORTHOMCL82	ORTHOMCL80
ORTHOMCL81	ORTHOMCL82	ORTHOMCL82	ORTHOMCL83	ORTHOMCL81	ORTHOMCL81	ORTHOMCL81	ORTHOMCL81	ORTHOMCL82	ORTHOMCL83	ORTHOMCL81
ORTHOMCL82	ORTHOMCL83	ORTHOMCL83	ORTHOMCL84	ORTHOMCL82	ORTHOMCL82	ORTHOMCL82	ORTHOMCL82	ORTHOMCL83	ORTHOMCL84	ORTHOMCL82
ORTHOMCL83	ORTHOMCL84	ORTHOMCL84	ORTHOMCL85	ORTHOMCL83	ORTHOMCL83	ORTHOMCL83	ORTHOMCL83	ORTHOMCL84	ORTHOMCL85	ORTHOMCL83
ORTHOMCL84	ORTHOMCL85	ORTHOMCL85	ORTHOMCL86	ORTHOMCL84	ORTHOMCL84	ORTHOMCL84	ORTHOMCL84	ORTHOMCL85	ORTHOMCL86	ORTHOMCL84
ORTHOMCL85	ORTHOMCL86	ORTHOMCL86	ORTHOMCL87	ORTHOMCL85	ORTHOMCL86	ORTHOMCL85	ORTHOMCL85	ORTHOMCL86	ORTHOMCL87	ORTHOMCL85
ORTHOMCL86	ORTHOMCL87	ORTHOMCL87	ORTHOMCL88	ORTHOMCL86	ORTHOMCL87	ORTHOMCL86	ORTHOMCL86	ORTHOMCL87	ORTHOMCL88	ORTHOMCL86
ORTHOMCL87	ORTHOMCL88	ORTHOMCL88	ORTHOMCL89	ORTHOMCL87	ORTHOMCL88	ORTHOMCL87	ORTHOMCL87	ORTHOMCL88	ORTHOMCL89	ORTHOMCL87
ORTHOMCL88	ORTHOMCL89	ORTHOMCL89	ORTHOMCL90	ORTHOMCL88	ORTHOMCL89	ORTHOMCL88	ORTHOMCL88	ORTHOMCL89	ORTHOMCL90	ORTHOMCL88
ORTHOMCL89	ORTHOMCL90	ORTHOMCL90	ORTHOMCL91	ORTHOMCL89	ORTHOMCL90	ORTHOMCL89	ORTHOMCL89	ORTHOMCL90	ORTHOMCL91	ORTHOMCL89
ORTHOMCL90	ORTHOMCL91	ORTHOMCL91	ORTHOMCL92	ORTHOMCL90	ORTHOMCL91	ORTHOMCL90	ORTHOMCL90	ORTHOMCL91	ORTHOMCL92	ORTHOMCL90
ORTHOMCL91	ORTHOMCL92	ORTHOMCL92	ORTHOMCL93	ORTHOMCL91	ORTHOMCL92	ORTHOMCL91	ORTHOMCL91	ORTHOMCL92	ORTHOMCL93	ORTHOMCL91
ORTHOMCL92	ORTHOMCL93	ORTHOMCL93	ORTHOMCL95	ORTHOMCL92	ORTHOMCL93	ORTHOMCL92	ORTHOMCL92	ORTHOMCL93	ORTHOMCL94	ORTHOMCL92
ORTHOMCL93	ORTHOMCL94	ORTHOMCL94	ORTHOMCL96	ORTHOMCL93	ORTHOMCL94	ORTHOMCL93	ORTHOMCL93	ORTHOMCL94	ORTHOMCL95	ORTHOMCL93
ORTHOMCL94	ORTHOMCL95	ORTHOMCL95	ORTHOMCL97	ORTHOMCL94	ORTHOMCL95	ORTHOMCL94	ORTHOMCL94	ORTHOMCL95	ORTHOMCL96	ORTHOMCL94
ORTHOMCL95	ORTHOMCL96	ORTHOMCL96	ORTHOMCL98	ORTHOMCL95	ORTHOMCL96	ORTHOMCL95	ORTHOMCL95	ORTHOMCL96	ORTHOMCL97	ORTHOMCL95
ORTHOMCL96	ORTHOMCL97	ORTHOMCL97	ORTHOMCL99	ORTHOMCL96	ORTHOMCL97	ORTHOMCL96	ORTHOMCL96	ORTHOMCL97	ORTHOMCL98	ORTHOMCL96
ORTHOMCL97	ORTHOMCL98	ORTHOMCL98	ORTHOMCL100	ORTHOMCL97	ORTHOMCL98	ORTHOMCL97	ORTHOMCL97	ORTHOMCL98	ORTHOMCL99	ORTHOMCL97
ORTHOMCL98	ORTHOMCL99	ORTHOMCL99	ORTHOMCL101	ORTHOMCL98	ORTHOMCL99	ORTHOMCL98	ORTHOMCL98	ORTHOMCL99	ORTHOMCL100	ORTHOMCL98
ORTHOMCL99	ORTHOMCL100	ORTHOMCL100	ORTHOMCL102	ORTHOMCL99	ORTHOMCL100	ORTHOMCL99	ORTHOMCL99	ORTHOMCL100	ORTHOMCL101	ORTHOMCL99
ORTHOMCL100	ORTHOMCL101	ORTHOMCL101	ORTHOMCL103	ORTHOMCL100	ORTHOMCL101	ORTHOMCL100	ORTHOMCL100	ORTHOMCL101	ORTHOMCL102	ORTHOMCL100
ORTHOMCL101	ORTHOMCL102	ORTHOMCL102	ORTHOMCL104	ORTHOMCL101	ORTHOMCL102	ORTHOMCL101	ORTHOMCL101	ORTHOMCL102	ORTHOMCL103	ORTHOMCL101
ORTHOMCL102	ORTHOMCL103	ORTHOMCL103	ORTHOMCL105	ORTHOMCL102	ORTHOMCL103	ORTHOMCL102	ORTHOMCL102	ORTHOMCL103	ORTHOMCL104	ORTHOMCL102
ORTHOMCL103	ORTHOMCL104	ORTHOMCL104	ORTHOMCL106	ORTHOMCL103	ORTHOMCL104	ORTHOMCL103	ORTHOMCL103	ORTHOMCL104	ORTHOMCL105	ORTHOMCL103
ORTHOMCL104	ORTHOMCL105	ORTHOMCL105	ORTHOMCL107	ORTHOMCL104	ORTHOMCL105	ORTHOMCL104	ORTHOMCL104	ORTHOMCL105	ORTHOMCL106	ORTHOMCL104
ORTHOMCL105	ORTHOMCL106	ORTHOMCL106	ORTHOMCL108	ORTHOMCL105	ORTHOMCL106	ORTHOMCL105	ORTHOMCL105	ORTHOMCL106	ORTHOMCL107	ORTHOMCL105
ORTHOMCL106	ORTHOMCL107	ORTHOMCL107	ORTHOMCL109	ORTHOMCL106	ORTHOMCL107	ORTHOMCL106	ORTHOMCL106	ORTHOMCL107	ORTHOMCL108	ORTHOMCL106
ORTHOMCL107	ORTHOMCL108	ORTHOMCL108	ORTHOMCL110	ORTHOMCL107	ORTHOMCL108	ORTHOMCL107	ORTHOMCL107	ORTHOMCL108	ORTHOMCL109	ORTHOMCL107
ORTHOMCL108	ORTHOMCL109	ORTHOMCL109	ORTHOMCL111	ORTHOMCL108	ORTHOMCL109	ORTHOMCL108	ORTHOMCL108	ORTHOMCL109	ORTHOMCL110	ORTHOMCL108
ORTHOMCL109	ORTHOMCL110	ORTHOMCL110	ORTHOMCL112	ORTHOMCL109	ORTHOMCL110	ORTHOMCL109	ORTHOMCL109	ORTHOMCL110	ORTHOMCL111	ORTHOMCL109
ORTHOMCL110	ORTHOMCL111	ORTHOMCL111	ORTHOMCL113	ORTHOMCL110	ORTHOMCL111	ORTHOMCL110	ORTHOMCL110	ORTHOMCL111	ORTHOMCL112	ORTHOMCL110
ORTHOMCL111	ORTHOMCL112	ORTHOMCL112	ORTHOMCL114	ORTHOMCL111	ORTHOMCL112	ORTHOMCL111	ORTHOMCL111	ORTHOMCL112	ORTHOMCL113	ORTHOMCL111
ORTHOMCL112	ORTHOMCL113	ORTHOMCL113	ORTHOMCL115	ORTHOMCL112	ORTHOMCL113	ORTHOMCL112	ORTHOMCL112	ORTHOMCL113	ORTHOMCL114	ORTHOMCL112
ORTHOMCL113	ORTHOMCL114	ORTHOMCL114	ORTHOMCL116	ORTHOMCL113	ORTHOMCL114	ORTHOMCL113	ORTHOMCL113	ORTHOMCL114	ORTHOMCL115	ORTHOMCL113
ORTHOMCL114	ORTHOMCL115	ORTHOMCL115	ORTHOMCL117	ORTHOMCL114	ORTHOMCL115	ORTHOMCL114	ORTHOMCL114	ORTHOMCL115	ORTHOMCL116	ORTHOMCL114
ORTHOMCL115	ORTHOMCL116	ORTHOMCL116	ORTHOMCL118	ORTHOMCL115	ORTHOMCL116	ORTHOMCL115	ORTHOMCL115	ORTHOMCL116	ORTHOMCL117	ORTHOMCL115
ORTHOMCL116	ORTHOMCL117	ORTHOMCL117	ORTHOMCL119	ORTHOMCL116	ORTHOMCL117	ORTHOMCL116	ORTHOMCL116	ORTHOMCL117	ORTHOMCL118	ORTHOMCL116
ORTHOMCL117	ORTHOMCL118	ORTHOMCL118	ORTHOMCL120	ORTHOMCL117	ORTHOMCL118	ORTHOMCL117	ORTHOMCL117	ORTHOMCL118	ORTHOMCL119	ORTHOMCL117
ORTHOMCL118	ORTHOMCL119	ORTHOMCL119	ORTHOMCL121	ORTHOMCL118	ORTHOMCL119	ORTHOMCL118	ORTHOMCL118	ORTHOMCL119	ORTHOMCL120	ORTHOMCL118
ORTHOMCL119	ORTHOMCL120	ORTHOMCL120	ORTHOMCL123	ORTHOMCL119	ORTHOMCL120	ORTHOMCL119	ORTHOMCL119	ORTHOMCL120	ORTHOMCL121	ORTHOMCL119
ORTHOMCL120	ORTHOMCL121	ORTHOMCL121	ORTHOMCL124	ORTHOMCL120	ORTHOMCL121	ORTHOMCL120	ORTHOMCL120	ORTHOMCL121	ORTHOMCL122	ORTHOMCL120
ORTHOMCL121	ORTHOMCL122	ORTHOMCL122	ORTHOMCL125	ORTHOMCL121	ORTHOMCL122	ORTHOMCL121	ORTHOMCL121	ORTHOMCL122	ORTHOMCL123	ORTHOMCL121
ORTHOMCL122	ORTHOMCL123	ORTHOMCL123	ORTHOMCL126	ORTHOMCL122	ORTHOMCL123	ORTHOMCL122	ORTHOMCL122	ORTHOMCL123	ORTHOMCL124	ORTHOMCL122
ORTHOMCL123	ORTHOMCL124	ORTHOMCL124	ORTHOMCL127	ORTHOMCL123	ORTHOMCL124	ORTHOMCL123	ORTHOMCL123	ORTHOMCL124	ORTHOMCL125	ORTHOMCL123
ORTHOMCL124	ORTHOMCL125	ORTHOMCL126	ORTHOMCL128	ORTHOMCL124	ORTHOMCL125	ORTHOMCL124	ORTHOMCL124	ORTHOMCL125	ORTHOMCL126	ORTHOMCL124
ORTHOMCL125	ORTHOMCL126	ORTHOMCL127	ORTHOMCL129	ORTHOMCL125	ORTHOMCL126	ORTHOMCL125	ORTHOMCL125	ORTHOMCL126	ORTHOMCL127	ORTHOMCL125
ORTHOMCL126	ORTHOMCL127	ORTHOMCL128	ORTHOMCL130	ORTHOMCL126	ORTHOMCL127	ORTHOMCL126	ORTHOMCL126	ORTHOMCL127	ORTHOMCL128	ORTHOMCL126
ORTHOMCL127	ORTHOMCL128	ORTHOMCL129	ORTHOMCL131	ORTHOMCL127	ORTHOMCL128	ORTHOMCL127	ORTHOMCL127	ORTHOMCL128	ORTHOMCL129	ORTHOMCL127
ORTHOMCL128	ORTHOMCL129	ORTHOMCL130	ORTHOMCL132	ORTHOMCL128	ORTHOMCL129	ORTHOMCL128	ORTHOMCL128	ORTHOMCL129	ORTHOMCL130	ORTHOMCL128
ORTHOMCL129	ORTHOMCL130	ORTHOMCL131	ORTHOMCL133	ORTHOMCL129	ORTHOMCL130	ORTHOMCL129	ORTHOMCL129	ORTHOMCL130	ORTHOMCL131	ORTHOMCL129
ORTHOMCL130	ORTHOMCL131	ORTHOMCL132	ORTHOMCL134	ORTHOMCL130	ORTHOMCL131	ORTHOMCL130	ORTHOMCL130	ORTHOMCL131	ORTHOMCL132	ORTHOMCL130
ORTHOMCL131	ORTHOMCL133	ORTHOMCL133	ORTHOMCL135	ORTHOMCL131	ORTHOMCL132	ORTHOMCL131	ORTHOMCL131	ORTHOMCL132	ORTHOMCL133	ORTHOMCL131
ORTHOMCL132	ORTHOMCL134	ORTHOMCL134	ORTHOMCL136	ORTHOMCL132	ORTHOMCL133	ORTHOMCL132	ORTHOMCL132	ORTHOMCL133	ORTHOMCL134	ORTHOMCL132
ORTHOMCL133	ORTHOMCL135	ORTHOMCL135	ORTHOMCL137	ORTHOMCL133	ORTHOMCL134	ORTHOMCL133	ORTHOMCL133	ORTHOMCL134	ORTHOMCL135	ORTHOMCL133
ORTHOMCL134	ORTHOMCL136	ORTHOMCL136	ORTHOMCL138	ORTHOMCL134	ORTHOMCL135	ORTHOMCL134	ORTHOMCL134	ORTHOMCL135	ORTHOMCL136	ORTHOMCL134
ORTHOMCL135	ORTHOMCL137	ORTHOMCL137	ORTHOMCL139	ORTHOMCL135	ORTHOMCL136	ORTHOMCL135	ORTHOMCL135	ORTHOMCL136	ORTHOMCL137	ORTHOMCL135
ORTHOMCL136	ORTHOMCL138	ORTHOMCL138	ORTHOMCL140	ORTHOMCL136	ORTHOMCL137	ORTHOMCL136	ORTHOMCL136	ORTHOMCL137	ORTHOMCL138	ORTHOMCL136
ORTHOMCL137	ORTHOMCL139	ORTHOMCL139	ORTHOMCL141	ORTHOMCL137	ORTHOMCL138	ORTHOMCL137	ORTHOMCL137	ORTHOMCL138	ORTHOMCL139	ORTHOMCL137
ORTHOMCL138	ORTHOMCL140	ORTHOMCL140	ORTHOMCL142	ORTHOMCL138	ORTHOMCL139	ORTHOMCL138	ORTHOMCL138	ORTHOMCL139	ORTHOMCL140	ORTHOMCL138
ORTHOMCL139	ORTHOMCL141	ORTHOMCL141	ORTHOMCL143	ORTHOMCL139	ORTHOMCL140	ORTHOMCL139	ORTHOMCL139	ORTHOMCL140	ORTHOMCL141	ORTHOMCL139
ORTHOMCL140	ORTHOMCL142	ORTHOMCL142	ORTHOMCL144	ORTHOMCL140	ORTHOMCL141	ORTHOMCL140	ORTHOMCL140	ORTHOMCL141	ORTHOMCL142	ORTHOMCL140
ORTHOMCL141	ORTHOMCL143	ORTHOMCL143	ORTHOMCL145	ORTHOMCL141	ORTHOMCL142	ORTHOMCL141	ORTHOMCL141	ORTHOMCL142	ORTHOMCL143	ORTHOMCL141
ORTHOMCL142	ORTHOMCL144	ORTHOMCL144	ORTHOMCL146	ORTHOMCL142	ORTHOMCL143	ORTHOMCL142	ORTHOMCL142	ORTHOMCL143	ORTHOMCL144	ORTHOMCL142
ORTHOMCL143	ORTHOMCL145	ORTHOMCL145	ORTHOMCL147	ORTHOMCL143	ORTHOMCL144	ORTHOMCL143	ORTHOMCL143	ORTHOMCL144	ORTHOMCL145	ORTHOMCL143
ORTHOMCL144	ORTHOMCL146	ORTHOMCL146	ORTHOMCL148	ORTHOMCL144	ORTHOMCL145	ORTHOMCL144	ORTHOMCL144	ORTHOMCL145	ORTHOMCL146	ORTHOMCL144
ORTHOMCL145	ORTHOMCL147	ORTHOMCL147	ORTHOMCL149	ORTHOMCL145	ORTHOMCL146	ORTHOMCL145	ORTHOMCL145	ORTHOMCL146	ORTHOMCL147	ORTHOMCL145
ORTHOMCL146	ORTHOMCL148	ORTHOMCL148	ORTHOMCL150	ORTHOMCL146	ORTHOMCL147	ORTHOMCL146	ORTHOMCL146	ORTHOMCL147	ORTHOMCL148	ORTHOMCL146
ORTHOMCL147	ORTHOMCL149	ORTHOMCL149	ORTHOMCL151	ORTHOMCL147	ORTHOMCL148	ORTHOMCL147	ORTHOMCL147	ORTHOMCL148	ORTHOMCL149	ORTHOMCL147
ORTHOMCL148	ORTHOMCL150	ORTHOMCL150	ORTHOMCL152	ORTHOMCL148	ORTHOMCL149	ORTHOMCL148	ORTHOMCL148	ORTHOMCL149	ORTHOMCL150	ORTHOMCL148
ORTHOMCL149	ORTHOMCL151	ORTHOMCL151	ORTHOMCL153	ORTHOMCL149	ORTHOMCL150	ORTHOMCL149	ORTHOMCL149	ORTHOMCL150	ORTHOMCL151	ORTHOMCL149
ORTHOMCL150	ORTHOMCL152	ORTHOMCL152	ORTHOMCL154	ORTHOMCL150	ORTHOMCL151	ORTHOMCL150	ORTHOMCL150	ORTHOMCL151	ORTHOMCL152	ORTHOMCL150
ORTHOMCL151	ORTHOMCL153	ORTHOMCL153	ORTHOMCL155	ORTHOMCL151	ORTHOMCL152	ORTHOMCL151	ORTHOMCL151	ORTHOMCL152	ORTHOMCL153	ORTHOMCL151
ORTHOMCL152	ORTHOMCL154	ORTHOMCL154	ORTHOMCL156	ORTHOMCL152	ORTHOMCL153	ORTHOMCL152	ORTHOMCL152	ORTHOMCL153	ORTHOMCL154	ORTHOMCL152
ORTHOMCL153	ORTHOMCL155	ORTHOMCL155	ORTHOMCL157	ORTHOMCL153	ORTHOMCL154	ORTHOMCL153	ORTHOMCL153	ORTHOMCL154	ORTHOMCL155	ORTHOMCL153
ORTHOMCL154	ORTHOMCL156	ORTHOMCL156	ORTHOMCL158	ORTHOMCL154	ORTHOMCL155	ORTHOMCL154	ORTHOMCL154	ORTHOMCL155	ORTHOMCL156	ORTHOMCL154
ORTHOMCL155	ORTHOMCL157	ORTHOMCL157	ORTHOMCL159	ORTHOMCL155	ORTHOMCL156	ORTHOMCL155	ORTHOMCL155	ORTHOMCL156	ORTHOMCL157	ORTHOMCL155
ORTHOMCL156	ORTHOMCL158	ORTHOMCL158	ORTHOMCL160	ORTHOMCL156	ORTHOMCL157	ORTHOMCL156	ORTHOMCL156	ORTHOMCL157	ORTHOMCL158	ORTHOMCL156
ORTHOMCL157	ORTHOMCL159	ORTHOMCL159	ORTHOMCL161	ORTHOMCL157	ORTHOMCL158	ORTHOMCL157	ORTHOMCL157	ORTHOMCL158	ORTHOMCL159	ORTHOMCL157
ORTHOMCL158	ORTHOMCL160	ORTHOMCL160	ORTHOMCL162	ORTHOMCL158	ORTHOMCL159	ORTHOMCL158	ORTHOMCL158	ORTHOMCL159	ORTHOMCL160	ORTHOMCL158
ORTHOMCL159	ORTHOMCL161	ORTHOMCL161	ORTHOMCL163	ORTHOMCL159	ORTHOMCL160	ORTHOMCL159	ORTHOMCL159	ORTHOMCL160	ORTHOMCL161	ORTHOMCL159
ORTHOMCL160	ORTHOMCL162	ORTHOMCL162	ORTHOMCL165	ORTHOMCL160	ORTHOMCL161	ORTHOMCL160	ORTHOMCL160	ORTHOMCL161	ORTHOMCL162	ORTHOMCL160
ORTHOMCL161	ORTHOMCL163	ORTHOMCL163	ORTHOMCL166	ORTHOMCL161	ORTHOMCL162	ORTHOMCL161	ORTHOMCL161	ORTHOMCL162	ORTHOMCL163	ORTHOMCL161
ORTHOMCL162	ORTHOMCL164	ORTHOMCL164	ORTHOMCL167	ORTHOMCL162	ORTHOMCL163	ORTHOMCL162	ORTHOMCL162	ORTHOMCL163	ORTHOMCL164	ORTHOMCL162
ORTHOMCL163	ORTHOMCL165	ORTHOMCL165	ORTHOMCL168	ORTHOMCL163	ORTHOMCL164	ORTHOMCL163	ORTHOMCL163	ORTHOMCL164	ORTHOMCL165	ORTHOMCL163
ORTHOMCL164	ORTHOMCL166	ORTHOMCL166	ORTHOMCL169	ORTHOMCL164	ORTHOMCL165	ORTHOMCL164	ORTHOMCL164	ORTHOMCL165	ORTHOMCL166	ORTHOMCL164
ORTHOMCL165	ORTHOMCL167	ORTHOMCL167	ORTHOMCL170	ORTHOMCL165	ORTHOMCL166	ORTHOMCL165	ORTHOMCL165	ORTHOMCL166	ORTHOMCL167	ORTHOMCL165
ORTHOMCL166	ORTHOMCL168	ORTHOMCL168	ORTHOMCL171	ORTHOMCL166	ORTHOMCL167	ORTHOMCL166	ORTHOMCL166	ORTHOMCL167	ORTHOMCL168	ORTHOMCL166
ORTHOMCL167	ORTHOMCL169	ORTHOMCL169	ORTHOMCL172	ORTHOMCL167	ORTHOMCL168	ORTHOMCL167	ORTHOMCL167	ORTHOMCL168	ORTHOMCL169	ORTHOMCL167
ORTHOMCL168	ORTHOMCL170	ORTHOMCL170	ORTHOMCL173	ORTHOMCL168	ORTHOMCL169	ORTHOMCL168	ORTHOMCL168	ORTHOMCL169	ORTHOMCL170	ORTHOMCL168
ORTHOMCL169	ORTHOMCL173	ORTHOMCL171	ORTHOMCL175	ORTHOMCL169	ORTHOMCL170	ORTHOMCL169	ORTHOMCL169	ORTHOMCL170	ORTHOMCL171	ORTHOMCL169
ORTHOMCL170	ORTHOMCL174	ORTHOMCL172	ORTHOMCL176	ORTHOMCL170	ORTHOMCL171	ORTHOMCL170	ORTHOMCL170	ORTHOMCL171	ORTHOMCL172	ORTHOMCL170
ORTHOMCL171	ORTHOMCL175	ORTHOMCL173	ORTHOMCL177	ORTHOMCL171	ORTHOMCL172	ORTHOMCL171	ORTHOMCL171	ORTHOMCL172	ORTHOMCL173	ORTHOMCL171
ORTHOMCL172	ORTHOMCL176	ORTHOMCL174	ORTHOMCL178	ORTHOMCL172	ORTHOMCL173	ORTHOMCL172	ORTHOMCL172	ORTHOMCL173	ORTHOMCL174	ORTHOMCL172
ORTHOMCL173	ORTHOMCL177	ORTHOMCL175	ORTHOMCL179	ORTHOMCL173	ORTHOMCL174	ORTHOMCL173	ORTHOMCL173	ORTHOMCL174	ORTHOMCL175	ORTHOMCL173
ORTHOMCL174	ORTHOMCL178	ORTHOMCL176	ORTHOMCL181	ORTHOMCL174	ORTHOMCL175	ORTHOMCL174	ORTHOMCL174	ORTHOMCL175	ORTHOMCL176	ORTHOMCL174
ORTHOMCL175	ORTHOMCL179	ORTHOMCL177	ORTHOMCL183	ORTHOMCL175	ORTHOMCL176	ORTHOMCL175	ORTHOMCL175	ORTHOMCL176	ORTHOMCL177	ORTHOMCL175
ORTHOMCL176	ORTHOMCL180	ORTHOMCL178	ORTHOMCL184	ORTHOMCL176	ORTHOMCL177	ORTHOMCL176	ORTHOMCL176	ORTHOMCL177	ORTHOMCL178	ORTHOMCL176
ORTHOMCL177	ORTHOMCL181	ORTHOMCL179	ORTHOMCL185	ORTHOMCL177	ORTHOMCL178	ORTHOMCL177	ORTHOMCL177	ORTHOMCL178	ORTHOMCL179	ORTHOMCL177
ORTHOMCL178	ORTHOMCL182	ORTHOMCL180	ORTHOMCL186	ORTHOMCL178	ORTHOMCL179	ORTHOMCL178	ORTHOMCL178	ORTHOMCL179	ORTHOMCL180	ORTHOMCL178
ORTHOMCL179	ORTHOMCL183	ORTHOMCL181	ORTHOMCL187	ORTHOMCL179	ORTHOMCL180	ORTHOMCL179	ORTHOMCL179	ORTHOMCL180	ORTHOMCL181	ORTHOMCL179
ORTHOMCL180	ORTHOMCL184	ORTHOMCL182	ORTHOMCL188	ORTHOMCL180	ORTHOMCL181	ORTHOMCL180	ORTHOMCL180	ORTHOMCL181	ORTHOMCL182	ORTHOMCL180
ORTHOMCL181	ORTHOMCL185	ORTHOMCL183	ORTHOMCL189	ORTHOMCL181	ORTHOMCL182	ORTHOMCL181	ORTHOMCL181	ORTHOMCL182	ORTHOMCL183	ORTHOMCL181
ORTHOMCL182	ORTHOMCL186	ORTHOMCL184	ORTHOMCL190	ORTHOMCL182	ORTHOMCL183	ORTHOMCL182	ORTHOMCL182	ORTHOMCL183	ORTHOMCL184	ORTHOMCL182
ORTHOMCL183	ORTHOMCL187	ORTHOMCL185	ORTHOMCL191	ORTHOMCL183	ORTHOMCL184	ORTHOMCL183	ORTHOMCL183	ORTHOMCL184	ORTHOMCL185	ORTHOMCL183
ORTHOMCL184	ORTHOMCL188	ORTHOMCL186	ORTHOMCL192	ORTHOMCL184	ORTHOMCL185	ORTHOMCL184	ORTHOMCL184	ORTHOMCL185	ORTHOMCL186	ORTHOMCL184
ORTHOMCL185	ORTHOMCL189	ORTHOMCL187	ORTHOMCL193	ORTHOMCL185	ORTHOMCL186	ORTHOMCL185	ORTHOMCL185	ORTHOMCL186	ORTHOMCL187	ORTHOMCL185
ORTHOMCL186	ORTHOMCL190	ORTHOMCL188	ORTHOMCL194	ORTHOMCL186	ORTHOMCL187	ORTHOMCL186	ORTHOMCL186	ORTHOMCL187	ORTHOMCL188	ORTHOMCL186
ORTHOMCL187	ORTHOMCL191	ORTHOMCL189	ORTHOMCL195	ORTHOMCL187	ORTHOMCL188	ORTHOMCL187	ORTHOMCL187	ORTHOMCL188	ORTHOMCL189	ORTHOMCL187
ORTHOMCL188	ORTHOMCL192	ORTHOMCL190	ORTHOMCL196	ORTHOMCL188	ORTHOMCL189	ORTHOMCL188	ORTHOMCL188	ORTHOMCL189	ORTHOMCL190	ORTHOMCL188
ORTHOMCL189	ORTHOMCL193	ORTHOMCL191	ORTHOMCL197	ORTHOMCL189	ORTHOMCL190	ORTHOMCL189	ORTHOMCL189	ORTHOMCL190	ORTHOMCL191	ORTHOMCL189
ORTHOMCL190	ORTHOMCL194	ORTHOMCL192	ORTHOMCL200	ORTHOMCL190	ORTHOMCL191	ORTHOMCL190	ORTHOMCL190	ORTHOMCL191	ORTHOMCL192	ORTHOMCL190
ORTHOMCL191	ORTHOMCL195	ORTHOMCL193	ORTHOMCL201	ORTHOMCL191	ORTHOMCL192	ORTHOMCL191	ORTHOMCL191	ORTHOMCL192	ORTHOMCL193	ORTHOMCL191
ORTHOMCL192	ORTHOMCL196	ORTHOMCL194	ORTHOMCL202	ORTHOMCL192	ORTHOMCL193	ORTHOMCL192	ORTHOMCL192	ORTHOMCL193	ORTHOMCL194	ORTHOMCL192
ORTHOMCL193	ORTHOMCL197	ORTHOMCL195	ORTHOMCL203	ORTHOMCL193	ORTHOMCL194	ORTHOMCL193	ORTHOMCL193	ORTHOMCL194	ORTHOMCL195	ORTHOMCL193
ORTHOMCL194	ORTHOMCL198	ORTHOMCL196	ORTHOMCL204	ORTHOMCL194	ORTHOMCL195	ORTHOMCL194	ORTHOMCL194	ORTHOMCL195	ORTHOMCL196	ORTHOMCL194
ORTHOMCL195	ORTHOMCL200	ORTHOMCL197	ORTHOMCL205	ORTHOMCL195	ORTHOMCL196	ORTHOMCL195	ORTHOMCL195	ORTHOMCL196	ORTHOMCL197	ORTHOMCL195
ORTHOMCL196	ORTHOMCL201	ORTHOMCL198	ORTHOMCL206	ORTHOMCL196	ORTHOMCL198	ORTHOMCL196	ORTHOMCL196	ORTHOMCL197	ORTHOMCL198	ORTHOMCL196
ORTHOMCL197	ORTHOMCL202	ORTHOMCL199	ORTHOMCL207	ORTHOMCL197	ORTHOMCL199	ORTHOMCL197	ORTHOMCL197	ORTHOMCL198	ORTHOMCL199	ORTHOMCL197
ORTHOMCL198	ORTHOMCL203	ORTHOMCL201	ORTHOMCL208	ORTHOMCL198	ORTHOMCL200	ORTHOMCL198	ORTHOMCL198	ORTHOMCL199	ORTHOMCL200	ORTHOMCL198
ORTHOMCL199	ORTHOMCL204	ORTHOMCL202	ORTHOMCL210	ORTHOMCL199	ORTHOMCL201	ORTHOMCL199	ORTHOMCL199	ORTHOMCL200	ORTHOMCL201	ORTHOMCL199
ORTHOMCL200	ORTHOMCL205	ORTHOMCL203	ORTHOMCL212	ORTHOMCL200	ORTHOMCL202	ORTHOMCL200	ORTHOMCL200	ORTHOMCL201	ORTHOMCL202	ORTHOMCL200
ORTHOMCL201	ORTHOMCL206	ORTHOMCL204	ORTHOMCL213	ORTHOMCL201	ORTHOMCL203	ORTHOMCL201	ORTHOMCL201	ORTHOMCL202	ORTHOMCL203	ORTHOMCL201
ORTHOMCL202	ORTHOMCL207	ORTHOMCL205	ORTHOMCL214	ORTHOMCL202	ORTHOMCL204	ORTHOMCL202	ORTHOMCL202	ORTHOMCL203	ORTHOMCL204	ORTHOMCL202
ORTHOMCL203	ORTHOMCL208	ORTHOMCL206	ORTHOMCL215	ORTHOMCL203	ORTHOMCL205	ORTHOMCL203	ORTHOMCL203	ORTHOMCL204	ORTHOMCL205	ORTHOMCL203
ORTHOMCL204	ORTHOMCL209	ORTHOMCL207	ORTHOMCL216	ORTHOMCL204	ORTHOMCL206	ORTHOMCL204	ORTHOMCL204	ORTHOMCL205	ORTHOMCL206	ORTHOMCL204
ORTHOMCL205	ORTHOMCL210	ORTHOMCL208	ORTHOMCL217	ORTHOMCL205	ORTHOMCL207	ORTHOMCL205	ORTHOMCL205	ORTHOMCL206	ORTHOMCL207	ORTHOMCL205
ORTHOMCL206	ORTHOMCL211	ORTHOMCL209	ORTHOMCL218	ORTHOMCL206	ORTHOMCL208	ORTHOMCL206	ORTHOMCL206	ORTHOMCL207	ORTHOMCL208	ORTHOMCL206
ORTHOMCL207	ORTHOMCL212	ORTHOMCL210	ORTHOMCL219	ORTHOMCL207	ORTHOMCL209	ORTHOMCL207	ORTHOMCL207	ORTHOMCL208	ORTHOMCL209	ORTHOMCL207
ORTHOMCL208	ORTHOMCL213	ORTHOMCL211	ORTHOMCL220	ORTHOMCL208	ORTHOMCL210	ORTHOMCL208	ORTHOMCL208	ORTHOMCL209	ORTHOMCL210	ORTHOMCL208
ORTHOMCL209	ORTHOMCL214	ORTHOMCL212	ORTHOMCL221	ORTHOMCL209	ORTHOMCL211	ORTHOMCL209	ORTHOMCL209	ORTHOMCL210	ORTHOMCL211	ORTHOMCL209
ORTHOMCL210	ORTHOMCL215	ORTHOMCL213	ORTHOMCL222	ORTHOMCL210	ORTHOMCL212	ORTHOMCL210	ORTHOMCL210	ORTHOMCL211	ORTHOMCL212	ORTHOMCL210
ORTHOMCL211	ORTHOMCL216	ORTHOMCL214	ORTHOMCL223	ORTHOMCL211	ORTHOMCL213	ORTHOMCL211	ORTHOMCL211	ORTHOMCL212	ORTHOMCL213	ORTHOMCL211
ORTHOMCL212	ORTHOMCL217	ORTHOMCL215	ORTHOMCL224	ORTHOMCL212	ORTHOMCL214	ORTHOMCL212	ORTHOMCL212	ORTHOMCL213	ORTHOMCL214	ORTHOMCL212
ORTHOMCL213	ORTHOMCL218	ORTHOMCL216	ORTHOMCL225	ORTHOMCL213	ORTHOMCL216	ORTHOMCL213	ORTHOMCL213	ORTHOMCL214	ORTHOMCL215	ORTHOMCL213
ORTHOMCL214	ORTHOMCL219	ORTHOMCL217	ORTHOMCL226	ORTHOMCL214	ORTHOMCL217	ORTHOMCL214	ORTHOMCL214	ORTHOMCL215	ORTHOMCL217	ORTHOMCL214
ORTHOMCL215	ORTHOMCL220	ORTHOMCL218	ORTHOMCL227	ORTHOMCL215	ORTHOMCL218	ORTHOMCL215	ORTHOMCL215	ORTHOMCL216	ORTHOMCL218	ORTHOMCL215
ORTHOMCL216	ORTHOMCL221	ORTHOMCL219	ORTHOMCL228	ORTHOMCL216	ORTHOMCL219	ORTHOMCL216	ORTHOMCL216	ORTHOMCL217	ORTHOMCL219	ORTHOMCL216
ORTHOMCL217	ORTHOMCL222	ORTHOMCL220	ORTHOMCL229	ORTHOMCL217	ORTHOMCL220	ORTHOMCL217	ORTHOMCL217	ORTHOMCL218	ORTHOMCL220	ORTHOMCL217
ORTHOMCL218	ORTHOMCL224	ORTHOMCL221	ORTHOMCL230	ORTHOMCL218	ORTHOMCL221	ORTHOMCL218	ORTHOMCL218	ORTHOMCL219	ORTHOMCL221	ORTHOMCL218
ORTHOMCL219	ORTHOMCL225	ORTHOMCL222	ORTHOMCL231	ORTHOMCL219	ORTHOMCL222	ORTHOMCL219	ORTHOMCL219	ORTHOMCL220	ORTHOMCL222	ORTHOMCL219
ORTHOMCL220	ORTHOMCL226	ORTHOMCL223	ORTHOMCL232	ORTHOMCL220	ORTHOMCL223	ORTHOMCL220	ORTHOMCL220	ORTHOMCL221	ORTHOMCL223	ORTHOMCL220
ORTHOMCL221	ORTHOMCL227	ORTHOMCL224	ORTHOMCL233	ORTHOMCL221	ORTHOMCL224	ORTHOMCL221	ORTHOMCL221	ORTHOMCL222	ORTHOMCL224	ORTHOMCL221
ORTHOMCL222	ORTHOMCL228	ORTHOMCL225	ORTHOMCL234	ORTHOMCL222	ORTHOMCL225	ORTHOMCL222	ORTHOMCL222	ORTHOMCL223	ORTHOMCL225	ORTHOMCL222
ORTHOMCL223	ORTHOMCL229	ORTHOMCL226	ORTHOMCL235	ORTHOMCL223	ORTHOMCL226	ORTHOMCL223	ORTHOMCL223	ORTHOMCL224	ORTHOMCL226	ORTHOMCL223
ORTHOMCL224	ORTHOMCL230	ORTHOMCL227	ORTHOMCL236	ORTHOMCL224	ORTHOMCL227	ORTHOMCL224	ORTHOMCL224	ORTHOMCL225	ORTHOMCL227	ORTHOMCL224
ORTHOMCL225	ORTHOMCL231	ORTHOMCL228	ORTHOMCL237	ORTHOMCL225	ORTHOMCL228	ORTHOMCL225	ORTHOMCL225	ORTHOMCL226	ORTHOMCL228	ORTHOMCL225
ORTHOMCL226	ORTHOMCL232	ORTHOMCL229	ORTHOMCL238	ORTHOMCL226	ORTHOMCL229	ORTHOMCL226	ORTHOMCL226	ORTHOMCL227	ORTHOMCL229	ORTHOMCL226
ORTHOMCL227	ORTHOMCL233	ORTHOMCL230	ORTHOMCL239	ORTHOMCL227	ORTHOMCL230	ORTHOMCL227	ORTHOMCL227	ORTHOMCL228	ORTHOMCL230	ORTHOMCL227
ORTHOMCL228	ORTHOMCL234	ORTHOMCL231	ORTHOMCL240	ORTHOMCL228	ORTHOMCL231	ORTHOMCL228	ORTHOMCL228	ORTHOMCL229	ORTHOMCL231	ORTHOMCL228
ORTHOMCL229	ORTHOMCL235	ORTHOMCL232	ORTHOMCL242	ORTHOMCL229	ORTHOMCL232	ORTHOMCL229	ORTHOMCL229	ORTHOMCL230	ORTHOMCL232	ORTHOMCL229
ORTHOMCL230	ORTHOMCL236	ORTHOMCL233	ORTHOMCL243	ORTHOMCL230	ORTHOMCL233	ORTHOMCL230	ORTHOMCL230	ORTHOMCL231	ORTHOMCL233	ORTHOMCL230
ORTHOMCL231	ORTHOMCL237	ORTHOMCL234	ORTHOMCL244	ORTHOMCL231	ORTHOMCL234	ORTHOMCL231	ORTHOMCL231	ORTHOMCL232	ORTHOMCL234	ORTHOMCL231
ORTHOMCL232	ORTHOMCL238	ORTHOMCL235	ORTHOMCL245	ORTHOMCL232	ORTHOMCL235	ORTHOMCL232	ORTHOMCL232	ORTHOMCL233	ORTHOMCL235	ORTHOMCL232
ORTHOMCL233	ORTHOMCL239	ORTHOMCL236	ORTHOMCL246	ORTHOMCL233	ORTHOMCL236	ORTHOMCL233	ORTHOMCL233	ORTHOMCL234	ORTHOMCL236	ORTHOMCL233
ORTHOMCL234	ORTHOMCL240	ORTHOMCL237	ORTHOMCL247	ORTHOMCL234	ORTHOMCL237	ORTHOMCL234	ORTHOMCL234	ORTHOMCL235	ORTHOMCL237	ORTHOMCL234
ORTHOMCL235	ORTHOMCL241	ORTHOMCL238	ORTHOMCL248	ORTHOMCL235	ORTHOMCL238	ORTHOMCL235	ORTHOMCL235	ORTHOMCL236	ORTHOMCL238	ORTHOMCL235
ORTHOMCL236	ORTHOMCL242	ORTHOMCL239	ORTHOMCL249	ORTHOMCL236	ORTHOMCL239	ORTHOMCL236	ORTHOMCL236	ORTHOMCL237	ORTHOMCL239	ORTHOMCL236
ORTHOMCL237	ORTHOMCL243	ORTHOMCL240	ORTHOMCL250	ORTHOMCL238	ORTHOMCL240	ORTHOMCL237	ORTHOMCL237	ORTHOMCL238	ORTHOMCL240	ORTHOMCL237
ORTHOMCL238	ORTHOMCL244	ORTHOMCL241	ORTHOMCL251	ORTHOMCL239	ORTHOMCL242	ORTHOMCL238	ORTHOMCL238	ORTHOMCL239	ORTHOMCL241	ORTHOMCL238
ORTHOMCL239	ORTHOMCL245	ORTHOMCL242	ORTHOMCL252	ORTHOMCL240	ORTHOMCL243	ORTHOMCL239	ORTHOMCL239	ORTHOMCL240	ORTHOMCL242	ORTHOMCL239
ORTHOMCL240	ORTHOMCL246	ORTHOMCL243	ORTHOMCL253	ORTHOMCL241	ORTHOMCL244	ORTHOMCL240	ORTHOMCL240	ORTHOMCL241	ORTHOMCL243	ORTHOMCL240
ORTHOMCL241	ORTHOMCL247	ORTHOMCL244	ORTHOMCL254	ORTHOMCL242	ORTHOMCL245	ORTHOMCL241	ORTHOMCL241	ORTHOMCL242	ORTHOMCL244	ORTHOMCL241
ORTHOMCL242	ORTHOMCL248	ORTHOMCL245	ORTHOMCL255	ORTHOMCL243	ORTHOMCL246	ORTHOMCL242	ORTHOMCL242	ORTHOMCL243	ORTHOMCL245	ORTHOMCL242
ORTHOMCL243	ORTHOMCL249	ORTHOMCL246	ORTHOMCL256	ORTHOMCL244	ORTHOMCL247	ORTHOMCL243	ORTHOMCL243	ORTHOMCL244	ORTHOMCL246	ORTHOMCL243
ORTHOMCL244	ORTHOMCL250	ORTHOMCL247	ORTHOMCL257	ORTHOMCL245	ORTHOMCL248	ORTHOMCL244	ORTHOMCL244	ORTHOMCL245	ORTHOMCL247	ORTHOMCL244
ORTHOMCL245	ORTHOMCL251	ORTHOMCL248	ORTHOMCL259	ORTHOMCL246	ORTHOMCL249	ORTHOMCL245	ORTHOMCL245	ORTHOMCL246	ORTHOMCL248	ORTHOMCL245
ORTHOMCL246	ORTHOMCL252	ORTHOMCL249	ORTHOMCL260	ORTHOMCL247	ORTHOMCL250	ORTHOMCL246	ORTHOMCL246	ORTHOMCL247	ORTHOMCL249	ORTHOMCL246
ORTHOMCL247	ORTHOMCL253	ORTHOMCL250	ORTHOMCL261	ORTHOMCL248	ORTHOMCL251	ORTHOMCL247	ORTHOMCL247	ORTHOMCL248	ORTHOMCL250	ORTHOMCL247
ORTHOMCL248	ORTHOMCL254	ORTHOMCL251	ORTHOMCL262	ORTHOMCL249	ORTHOMCL252	ORTHOMCL248	ORTHOMCL248	ORTHOMCL249	ORTHOMCL251	ORTHOMCL248
ORTHOMCL249	ORTHOMCL256	ORTHOMCL252	ORTHOMCL263	ORTHOMCL250	ORTHOMCL253	ORTHOMCL249	ORTHOMCL250	ORTHOMCL250	ORTHOMCL252	ORTHOMCL249
ORTHOMCL250	ORTHOMCL257	ORTHOMCL253	ORTHOMCL264	ORTHOMCL251	ORTHOMCL254	ORTHOMCL250	ORTHOMCL251	ORTHOMCL251	ORTHOMCL253	ORTHOMCL250
ORTHOMCL251	ORTHOMCL258	ORTHOMCL254	ORTHOMCL265	ORTHOMCL252	ORTHOMCL255	ORTHOMCL251	ORTHOMCL252	ORTHOMCL252	ORTHOMCL254	ORTHOMCL251
ORTHOMCL252	ORTHOMCL259	ORTHOMCL255	ORTHOMCL267	ORTHOMCL253	ORTHOMCL256	ORTHOMCL252	ORTHOMCL253	ORTHOMCL253	ORTHOMCL255	ORTHOMCL252
ORTHOMCL253	ORTHOMCL260	ORTHOMCL256	ORTHOMCL268	ORTHOMCL254	ORTHOMCL257	ORTHOMCL253	ORTHOMCL254	ORTHOMCL254	ORTHOMCL256	ORTHOMCL253
ORTHOMCL254	ORTHOMCL261	ORTHOMCL257	ORTHOMCL269	ORTHOMCL255	ORTHOMCL258	ORTHOMCL254	ORTHOMCL255	ORTHOMCL255	ORTHOMCL257	ORTHOMCL254
ORTHOMCL255	ORTHOMCL262	ORTHOMCL258	ORTHOMCL270	ORTHOMCL256	ORTHOMCL259	ORTHOMCL255	ORTHOMCL256	ORTHOMCL256	ORTHOMCL258	ORTHOMCL255
ORTHOMCL256	ORTHOMCL263	ORTHOMCL259	ORTHOMCL271	ORTHOMCL257	ORTHOMCL260	ORTHOMCL256	ORTHOMCL257	ORTHOMCL257	ORTHOMCL259	ORTHOMCL256
ORTHOMCL257	ORTHOMCL264	ORTHOMCL260	ORTHOMCL272	ORTHOMCL258	ORTHOMCL261	ORTHOMCL257	ORTHOMCL258	ORTHOMCL258	ORTHOMCL260	ORTHOMCL257
ORTHOMCL258	ORTHOMCL265	ORTHOMCL261	ORTHOMCL273	ORTHOMCL259	ORTHOMCL262	ORTHOMCL258	ORTHOMCL259	ORTHOMCL259	ORTHOMCL261	ORTHOMCL258
ORTHOMCL259	ORTHOMCL266	ORTHOMCL262	ORTHOMCL274	ORTHOMCL260	ORTHOMCL263	ORTHOMCL259	ORTHOMCL260	ORTHOMCL260	ORTHOMCL262	ORTHOMCL259
ORTHOMCL260	ORTHOMCL268	ORTHOMCL263	ORTHOMCL275	ORTHOMCL261	ORTHOMCL264	ORTHOMCL260	ORTHOMCL261	ORTHOMCL261	ORTHOMCL263	ORTHOMCL260
ORTHOMCL261	ORTHOMCL269	ORTHOMCL264	ORTHOMCL276	ORTHOMCL262	ORTHOMCL265	ORTHOMCL261	ORTHOMCL262	ORTHOMCL262	ORTHOMCL264	ORTHOMCL261
ORTHOMCL262	ORTHOMCL270	ORTHOMCL265	ORTHOMCL277	ORTHOMCL263	ORTHOMCL266	ORTHOMCL262	ORTHOMCL263	ORTHOMCL263	ORTHOMCL265	ORTHOMCL262
ORTHOMCL263	ORTHOMCL272	ORTHOMCL266	ORTHOMCL278	ORTHOMCL264	ORTHOMCL267	ORTHOMCL263	ORTHOMCL264	ORTHOMCL264	ORTHOMCL266	ORTHOMCL263
ORTHOMCL264	ORTHOMCL273	ORTHOMCL267	ORTHOMCL279	ORTHOMCL265	ORTHOMCL268	ORTHOMCL264	ORTHOMCL265	ORTHOMCL265	ORTHOMCL267	ORTHOMCL264
ORTHOMCL265	ORTHOMCL274	ORTHOMCL268	ORTHOMCL280	ORTHOMCL266	ORTHOMCL269	ORTHOMCL265	ORTHOMCL266	ORTHOMCL266	ORTHOMCL268	ORTHOMCL265
ORTHOMCL266	ORTHOMCL275	ORTHOMCL269	ORTHOMCL282	ORTHOMCL267	ORTHOMCL270	ORTHOMCL266	ORTHOMCL267	ORTHOMCL267	ORTHOMCL269	ORTHOMCL266
ORTHOMCL267	ORTHOMCL276	ORTHOMCL270	ORTHOMCL283	ORTHOMCL268	ORTHOMCL271	ORTHOMCL267	ORTHOMCL268	ORTHOMCL268	ORTHOMCL270	ORTHOMCL267
ORTHOMCL268	ORTHOMCL277	ORTHOMCL271	ORTHOMCL284	ORTHOMCL269	ORTHOMCL272	ORTHOMCL268	ORTHOMCL269	ORTHOMCL269	ORTHOMCL271	ORTHOMCL268
ORTHOMCL269	ORTHOMCL278	ORTHOMCL272	ORTHOMCL285	ORTHOMCL270	ORTHOMCL273	ORTHOMCL269	ORTHOMCL270	ORTHOMCL270	ORTHOMCL272	ORTHOMCL269
ORTHOMCL270	ORTHOMCL279	ORTHOMCL273	ORTHOMCL288	ORTHOMCL271	ORTHOMCL274	ORTHOMCL270	ORTHOMCL271	ORTHOMCL271	ORTHOMCL273	ORTHOMCL270
ORTHOMCL271	ORTHOMCL280	ORTHOMCL274	ORTHOMCL289	ORTHOMCL272	ORTHOMCL275	ORTHOMCL271	ORTHOMCL272	ORTHOMCL272	ORTHOMCL274	ORTHOMCL271
ORTHOMCL272	ORTHOMCL281	ORTHOMCL275	ORTHOMCL290	ORTHOMCL273	ORTHOMCL276	ORTHOMCL272	ORTHOMCL273	ORTHOMCL273	ORTHOMCL275	ORTHOMCL272
ORTHOMCL273	ORTHOMCL282	ORTHOMCL276	ORTHOMCL291	ORTHOMCL274	ORTHOMCL277	ORTHOMCL273	ORTHOMCL274	ORTHOMCL274	ORTHOMCL276	ORTHOMCL273
ORTHOMCL274	ORTHOMCL283	ORTHOMCL277	ORTHOMCL292	ORTHOMCL275	ORTHOMCL278	ORTHOMCL274	ORTHOMCL275	ORTHOMCL275	ORTHOMCL277	ORTHOMCL274
ORTHOMCL275	ORTHOMCL284	ORTHOMCL278	ORTHOMCL293	ORTHOMCL276	ORTHOMCL279	ORTHOMCL275	ORTHOMCL276	ORTHOMCL276	ORTHOMCL278	ORTHOMCL275
ORTHOMCL276	ORTHOMCL285	ORTHOMCL279	ORTHOMCL294	ORTHOMCL277	ORTHOMCL280	ORTHOMCL276	ORTHOMCL277	ORTHOMCL277	ORTHOMCL279	ORTHOMCL276
ORTHOMCL277	ORTHOMCL286	ORTHOMCL280	ORTHOMCL295	ORTHOMCL278	ORTHOMCL281	ORTHOMCL277	ORTHOMCL278	ORTHOMCL278	ORTHOMCL280	ORTHOMCL277
ORTHOMCL278	ORTHOMCL287	ORTHOMCL281	ORTHOMCL296	ORTHOMCL279	ORTHOMCL282	ORTHOMCL278	ORTHOMCL279	ORTHOMCL279	ORTHOMCL281	ORTHOMCL278
ORTHOMCL279	ORTHOMCL288	ORTHOMCL282	ORTHOMCL297	ORTHOMCL280	ORTHOMCL283	ORTHOMCL279	ORTHOMCL280	ORTHOMCL280	ORTHOMCL282	ORTHOMCL279
ORTHOMCL280	ORTHOMCL289	ORTHOMCL283	ORTHOMCL298	ORTHOMCL281	ORTHOMCL284	ORTHOMCL280	ORTHOMCL281	ORTHOMCL281	ORTHOMCL283	ORTHOMCL280
ORTHOMCL281	ORTHOMCL290	ORTHOMCL284	ORTHOMCL299	ORTHOMCL282	ORTHOMCL285	ORTHOMCL281	ORTHOMCL282	ORTHOMCL282	ORTHOMCL284	ORTHOMCL281
ORTHOMCL282	ORTHOMCL291	ORTHOMCL285	ORTHOMCL300	ORTHOMCL283	ORTHOMCL286	ORTHOMCL282	ORTHOMCL283	ORTHOMCL283	ORTHOMCL285	ORTHOMCL282
ORTHOMCL283	ORTHOMCL292	ORTHOMCL286	ORTHOMCL301	ORTHOMCL284	ORTHOMCL287	ORTHOMCL283	ORTHOMCL284	ORTHOMCL284	ORTHOMCL286	ORTHOMCL283
ORTHOMCL284	ORTHOMCL293	ORTHOMCL287	ORTHOMCL302	ORTHOMCL285	ORTHOMCL288	ORTHOMCL284	ORTHOMCL285	ORTHOMCL285	ORTHOMCL287	ORTHOMCL284
ORTHOMCL285	ORTHOMCL294	ORTHOMCL288	ORTHOMCL303	ORTHOMCL286	ORTHOMCL289	ORTHOMCL285	ORTHOMCL286	ORTHOMCL286	ORTHOMCL288	ORTHOMCL285
ORTHOMCL286	ORTHOMCL295	ORTHOMCL289	ORTHOMCL304	ORTHOMCL287	ORTHOMCL290	ORTHOMCL286	ORTHOMCL287	ORTHOMCL287	ORTHOMCL289	ORTHOMCL286
ORTHOMCL287	ORTHOMCL296	ORTHOMCL290	ORTHOMCL305	ORTHOMCL288	ORTHOMCL291	ORTHOMCL287	ORTHOMCL288	ORTHOMCL288	ORTHOMCL290	ORTHOMCL287
ORTHOMCL288	ORTHOMCL298	ORTHOMCL291	ORTHOMCL306	ORTHOMCL289	ORTHOMCL292	ORTHOMCL288	ORTHOMCL289	ORTHOMCL289	ORTHOMCL291	ORTHOMCL288
ORTHOMCL289	ORTHOMCL299	ORTHOMCL292	ORTHOMCL307	ORTHOMCL290	ORTHOMCL293	ORTHOMCL289	ORTHOMCL290	ORTHOMCL290	ORTHOMCL292	ORTHOMCL289
ORTHOMCL290	ORTHOMCL300	ORTHOMCL293	ORTHOMCL308	ORTHOMCL291	ORTHOMCL294	ORTHOMCL290	ORTHOMCL291	ORTHOMCL291	ORTHOMCL293	ORTHOMCL290
ORTHOMCL291	ORTHOMCL301	ORTHOMCL294	ORTHOMCL309	ORTHOMCL292	ORTHOMCL295	ORTHOMCL291	ORTHOMCL292	ORTHOMCL292	ORTHOMCL294	ORTHOMCL291
ORTHOMCL292	ORTHOMCL303	ORTHOMCL295	ORTHOMCL310	ORTHOMCL293	ORTHOMCL296	ORTHOMCL292	ORTHOMCL293	ORTHOMCL293	ORTHOMCL295	ORTHOMCL292
ORTHOMCL293	ORTHOMCL304	ORTHOMCL296	ORTHOMCL312	ORTHOMCL294	ORTHOMCL297	ORTHOMCL293	ORTHOMCL294	ORTHOMCL294	ORTHOMCL296	ORTHOMCL293
ORTHOMCL294	ORTHOMCL305	ORTHOMCL297	ORTHOMCL313	ORTHOMCL295	ORTHOMCL298	ORTHOMCL294	ORTHOMCL295	ORTHOMCL296	ORTHOMCL297	ORTHOMCL294
ORTHOMCL295	ORTHOMCL306	ORTHOMCL298	ORTHOMCL316	ORTHOMCL296	ORTHOMCL299	ORTHOMCL295	ORTHOMCL296	ORTHOMCL297	ORTHOMCL298	ORTHOMCL295
ORTHOMCL296	ORTHOMCL307	ORTHOMCL299	ORTHOMCL317	ORTHOMCL297	ORTHOMCL300	ORTHOMCL296	ORTHOMCL297	ORTHOMCL298	ORTHOMCL299	ORTHOMCL296
ORTHOMCL297	ORTHOMCL308	ORTHOMCL300	ORTHOMCL318	ORTHOMCL298	ORTHOMCL301	ORTHOMCL297	ORTHOMCL298	ORTHOMCL299	ORTHOMCL300	ORTHOMCL297
ORTHOMCL298	ORTHOMCL309	ORTHOMCL301	ORTHOMCL319	ORTHOMCL299	ORTHOMCL302	ORTHOMCL298	ORTHOMCL299	ORTHOMCL300	ORTHOMCL301	ORTHOMCL298
ORTHOMCL299	ORTHOMCL310	ORTHOMCL302	ORTHOMCL320	ORTHOMCL300	ORTHOMCL303	ORTHOMCL299	ORTHOMCL300	ORTHOMCL301	ORTHOMCL303	ORTHOMCL299
ORTHOMCL300	ORTHOMCL311	ORTHOMCL303	ORTHOMCL321	ORTHOMCL301	ORTHOMCL304	ORTHOMCL300	ORTHOMCL301	ORTHOMCL302	ORTHOMCL304	ORTHOMCL300
ORTHOMCL301	ORTHOMCL312	ORTHOMCL304	ORTHOMCL323	ORTHOMCL303	ORTHOMCL305	ORTHOMCL301	ORTHOMCL302	ORTHOMCL303	ORTHOMCL305	ORTHOMCL301
ORTHOMCL302	ORTHOMCL313	ORTHOMCL305	ORTHOMCL324	ORTHOMCL304	ORTHOMCL306	ORTHOMCL302	ORTHOMCL303	ORTHOMCL304	ORTHOMCL306	ORTHOMCL302
ORTHOMCL303	ORTHOMCL314	ORTHOMCL306	ORTHOMCL325	ORTHOMCL305	ORTHOMCL307	ORTHOMCL303	ORTHOMCL304	ORTHOMCL305	ORTHOMCL307	ORTHOMCL303
ORTHOMCL304	ORTHOMCL315	ORTHOMCL307	ORTHOMCL326	ORTHOMCL306	ORTHOMCL309	ORTHOMCL304	ORTHOMCL305	ORTHOMCL306	ORTHOMCL308	ORTHOMCL304
ORTHOMCL305	ORTHOMCL316	ORTHOMCL308	ORTHOMCL327	ORTHOMCL307	ORTHOMCL310	ORTHOMCL305	ORTHOMCL306	ORTHOMCL307	ORTHOMCL309	ORTHOMCL305
ORTHOMCL306	ORTHOMCL317	ORTHOMCL309	ORTHOMCL329	ORTHOMCL308	ORTHOMCL311	ORTHOMCL306	ORTHOMCL307	ORTHOMCL308	ORTHOMCL310	ORTHOMCL306
ORTHOMCL307	ORTHOMCL318	ORTHOMCL310	ORTHOMCL330	ORTHOMCL309	ORTHOMCL312	ORTHOMCL307	ORTHOMCL308	ORTHOMCL309	ORTHOMCL311	ORTHOMCL307
ORTHOMCL308	ORTHOMCL319	ORTHOMCL311	ORTHOMCL331	ORTHOMCL310	ORTHOMCL313	ORTHOMCL308	ORTHOMCL309	ORTHOMCL310	ORTHOMCL312	ORTHOMCL308
ORTHOMCL309	ORTHOMCL320	ORTHOMCL312	ORTHOMCL332	ORTHOMCL311	ORTHOMCL314	ORTHOMCL309	ORTHOMCL310	ORTHOMCL311	ORTHOMCL313	ORTHOMCL309
ORTHOMCL310	ORTHOMCL321	ORTHOMCL313	ORTHOMCL333	ORTHOMCL312	ORTHOMCL315	ORTHOMCL310	ORTHOMCL311	ORTHOMCL312	ORTHOMCL314	ORTHOMCL310
ORTHOMCL311	ORTHOMCL322	ORTHOMCL314	ORTHOMCL334	ORTHOMCL313	ORTHOMCL316	ORTHOMCL311	ORTHOMCL313	ORTHOMCL313	ORTHOMCL315	ORTHOMCL311
ORTHOMCL312	ORTHOMCL323	ORTHOMCL315	ORTHOMCL335	ORTHOMCL314	ORTHOMCL317	ORTHOMCL312	ORTHOMCL314	ORTHOMCL314	ORTHOMCL316	ORTHOMCL313
ORTHOMCL313	ORTHOMCL324	ORTHOMCL316	ORTHOMCL336	ORTHOMCL315	ORTHOMCL319	ORTHOMCL313	ORTHOMCL315	ORTHOMCL315	ORTHOMCL317	ORTHOMCL315
ORTHOMCL314	ORTHOMCL325	ORTHOMCL317	ORTHOMCL337	ORTHOMCL316	ORTHOMCL320	ORTHOMCL314	ORTHOMCL316	ORTHOMCL316	ORTHOMCL318	ORTHOMCL316
ORTHOMCL315	ORTHOMCL327	ORTHOMCL318	ORTHOMCL338	ORTHOMCL317	ORTHOMCL321	ORTHOMCL315	ORTHOMCL317	ORTHOMCL317	ORTHOMCL319	ORTHOMCL317
ORTHOMCL316	ORTHOMCL328	ORTHOMCL319	ORTHOMCL339	ORTHOMCL318	ORTHOMCL323	ORTHOMCL316	ORTHOMCL318	ORTHOMCL318	ORTHOMCL320	ORTHOMCL318
ORTHOMCL317	ORTHOMCL329	ORTHOMCL320	ORTHOMCL340	ORTHOMCL319	ORTHOMCL324	ORTHOMCL317	ORTHOMCL319	ORTHOMCL319	ORTHOMCL321	ORTHOMCL319
ORTHOMCL318	ORTHOMCL331	ORTHOMCL321	ORTHOMCL341	ORTHOMCL320	ORTHOMCL325	ORTHOMCL318	ORTHOMCL320	ORTHOMCL320	ORTHOMCL322	ORTHOMCL320
ORTHOMCL319	ORTHOMCL332	ORTHOMCL322	ORTHOMCL342	ORTHOMCL321	ORTHOMCL326	ORTHOMCL319	ORTHOMCL321	ORTHOMCL321	ORTHOMCL323	ORTHOMCL321
ORTHOMCL320	ORTHOMCL333	ORTHOMCL323	ORTHOMCL343	ORTHOMCL322	ORTHOMCL327	ORTHOMCL320	ORTHOMCL322	ORTHOMCL322	ORTHOMCL324	ORTHOMCL322
ORTHOMCL321	ORTHOMCL334	ORTHOMCL324	ORTHOMCL344	ORTHOMCL323	ORTHOMCL328	ORTHOMCL321	ORTHOMCL323	ORTHOMCL323	ORTHOMCL325	ORTHOMCL323
ORTHOMCL322	ORTHOMCL335	ORTHOMCL325	ORTHOMCL345	ORTHOMCL324	ORTHOMCL329	ORTHOMCL322	ORTHOMCL324	ORTHOMCL324	ORTHOMCL327	ORTHOMCL324
ORTHOMCL323	ORTHOMCL336	ORTHOMCL326	ORTHOMCL346	ORTHOMCL325	ORTHOMCL330	ORTHOMCL324	ORTHOMCL325	ORTHOMCL325	ORTHOMCL328	ORTHOMCL325
ORTHOMCL324	ORTHOMCL337	ORTHOMCL327	ORTHOMCL347	ORTHOMCL326	ORTHOMCL331	ORTHOMCL325	ORTHOMCL326	ORTHOMCL326	ORTHOMCL329	ORTHOMCL326
ORTHOMCL325	ORTHOMCL338	ORTHOMCL328	ORTHOMCL348	ORTHOMCL327	ORTHOMCL332	ORTHOMCL326	ORTHOMCL327	ORTHOMCL327	ORTHOMCL330	ORTHOMCL327
ORTHOMCL326	ORTHOMCL339	ORTHOMCL329	ORTHOMCL349	ORTHOMCL328	ORTHOMCL333	ORTHOMCL327	ORTHOMCL328	ORTHOMCL328	ORTHOMCL331	ORTHOMCL328
ORTHOMCL327	ORTHOMCL340	ORTHOMCL330	ORTHOMCL350	ORTHOMCL329	ORTHOMCL334	ORTHOMCL329	ORTHOMCL329	ORTHOMCL329	ORTHOMCL332	ORTHOMCL329
ORTHOMCL328	ORTHOMCL341	ORTHOMCL331	ORTHOMCL351	ORTHOMCL330	ORTHOMCL335	ORTHOMCL330	ORTHOMCL330	ORTHOMCL330	ORTHOMCL333	ORTHOMCL330
ORTHOMCL329	ORTHOMCL342	ORTHOMCL332	ORTHOMCL352	ORTHOMCL331	ORTHOMCL336	ORTHOMCL331	ORTHOMCL331	ORTHOMCL331	ORTHOMCL334	ORTHOMCL331
ORTHOMCL330	ORTHOMCL343	ORTHOMCL333	ORTHOMCL353	ORTHOMCL332	ORTHOMCL337	ORTHOMCL332	ORTHOMCL332	ORTHOMCL332	ORTHOMCL335	ORTHOMCL332
ORTHOMCL331	ORTHOMCL344	ORTHOMCL334	ORTHOMCL354	ORTHOMCL333	ORTHOMCL338	ORTHOMCL333	ORTHOMCL333	ORTHOMCL333	ORTHOMCL336	ORTHOMCL333
ORTHOMCL332	ORTHOMCL345	ORTHOMCL335	ORTHOMCL355	ORTHOMCL334	ORTHOMCL339	ORTHOMCL334	ORTHOMCL334	ORTHOMCL334	ORTHOMCL337	ORTHOMCL334
ORTHOMCL333	ORTHOMCL346	ORTHOMCL336	ORTHOMCL356	ORTHOMCL335	ORTHOMCL340	ORTHOMCL335	ORTHOMCL335	ORTHOMCL335	ORTHOMCL338	ORTHOMCL335
ORTHOMCL334	ORTHOMCL347	ORTHOMCL337	ORTHOMCL357	ORTHOMCL336	ORTHOMCL341	ORTHOMCL336	ORTHOMCL336	ORTHOMCL336	ORTHOMCL339	ORTHOMCL336
ORTHOMCL335	ORTHOMCL348	ORTHOMCL338	ORTHOMCL358	ORTHOMCL337	ORTHOMCL342	ORTHOMCL337	ORTHOMCL337	ORTHOMCL337	ORTHOMCL340	ORTHOMCL337
ORTHOMCL336	ORTHOMCL349	ORTHOMCL339	ORTHOMCL359	ORTHOMCL338	ORTHOMCL343	ORTHOMCL338	ORTHOMCL338	ORTHOMCL338	ORTHOMCL341	ORTHOMCL338
ORTHOMCL337	ORTHOMCL350	ORTHOMCL340	ORTHOMCL360	ORTHOMCL339	ORTHOMCL344	ORTHOMCL339	ORTHOMCL339	ORTHOMCL339	ORTHOMCL342	ORTHOMCL339
ORTHOMCL338	ORTHOMCL351	ORTHOMCL341	ORTHOMCL362	ORTHOMCL340	ORTHOMCL345	ORTHOMCL340	ORTHOMCL340	ORTHOMCL340	ORTHOMCL343	ORTHOMCL340
ORTHOMCL339	ORTHOMCL352	ORTHOMCL342	ORTHOMCL363	ORTHOMCL341	ORTHOMCL346	ORTHOMCL341	ORTHOMCL341	ORTHOMCL341	ORTHOMCL344	ORTHOMCL341
ORTHOMCL340	ORTHOMCL353	ORTHOMCL343	ORTHOMCL364	ORTHOMCL342	ORTHOMCL347	ORTHOMCL342	ORTHOMCL342	ORTHOMCL342	ORTHOMCL345	ORTHOMCL342
ORTHOMCL341	ORTHOMCL354	ORTHOMCL344	ORTHOMCL365	ORTHOMCL343	ORTHOMCL348	ORTHOMCL343	ORTHOMCL343	ORTHOMCL343	ORTHOMCL346	ORTHOMCL343
ORTHOMCL342	ORTHOMCL355	ORTHOMCL345	ORTHOMCL366	ORTHOMCL344	ORTHOMCL349	ORTHOMCL344	ORTHOMCL344	ORTHOMCL344	ORTHOMCL347	ORTHOMCL344
ORTHOMCL343	ORTHOMCL356	ORTHOMCL346	ORTHOMCL367	ORTHOMCL345	ORTHOMCL350	ORTHOMCL345	ORTHOMCL345	ORTHOMCL345	ORTHOMCL348	ORTHOMCL345
ORTHOMCL344	ORTHOMCL357	ORTHOMCL347	ORTHOMCL368	ORTHOMCL346	ORTHOMCL351	ORTHOMCL346	ORTHOMCL346	ORTHOMCL346	ORTHOMCL349	ORTHOMCL346
ORTHOMCL345	ORTHOMCL359	ORTHOMCL348	ORTHOMCL369	ORTHOMCL347	ORTHOMCL352	ORTHOMCL347	ORTHOMCL347	ORTHOMCL347	ORTHOMCL350	ORTHOMCL347
ORTHOMCL346	ORTHOMCL360	ORTHOMCL349	ORTHOMCL370	ORTHOMCL348	ORTHOMCL353	ORTHOMCL348	ORTHOMCL348	ORTHOMCL348	ORTHOMCL351	ORTHOMCL348
ORTHOMCL347	ORTHOMCL361	ORTHOMCL350	ORTHOMCL371	ORTHOMCL349	ORTHOMCL354	ORTHOMCL349	ORTHOMCL349	ORTHOMCL349	ORTHOMCL352	ORTHOMCL349
ORTHOMCL348	ORTHOMCL362	ORTHOMCL351	ORTHOMCL372	ORTHOMCL350	ORTHOMCL355	ORTHOMCL350	ORTHOMCL350	ORTHOMCL350	ORTHOMCL353	ORTHOMCL350
ORTHOMCL349	ORTHOMCL363	ORTHOMCL352	ORTHOMCL373	ORTHOMCL351	ORTHOMCL356	ORTHOMCL351	ORTHOMCL351	ORTHOMCL351	ORTHOMCL354	ORTHOMCL351
ORTHOMCL350	ORTHOMCL364	ORTHOMCL353	ORTHOMCL374	ORTHOMCL352	ORTHOMCL357	ORTHOMCL352	ORTHOMCL352	ORTHOMCL352	ORTHOMCL355	ORTHOMCL353
ORTHOMCL351	ORTHOMCL365	ORTHOMCL354	ORTHOMCL375	ORTHOMCL353	ORTHOMCL358	ORTHOMCL353	ORTHOMCL353	ORTHOMCL353	ORTHOMCL356	ORTHOMCL354
ORTHOMCL352	ORTHOMCL367	ORTHOMCL355	ORTHOMCL376	ORTHOMCL354	ORTHOMCL359	ORTHOMCL354	ORTHOMCL354	ORTHOMCL354	ORTHOMCL357	ORTHOMCL355
ORTHOMCL353	ORTHOMCL368	ORTHOMCL356	ORTHOMCL377	ORTHOMCL355	ORTHOMCL360	ORTHOMCL355	ORTHOMCL355	ORTHOMCL355	ORTHOMCL358	ORTHOMCL356
ORTHOMCL354	ORTHOMCL369	ORTHOMCL357	ORTHOMCL378	ORTHOMCL356	ORTHOMCL361	ORTHOMCL356	ORTHOMCL356	ORTHOMCL356	ORTHOMCL359	ORTHOMCL357
ORTHOMCL355	ORTHOMCL370	ORTHOMCL358	ORTHOMCL379	ORTHOMCL357	ORTHOMCL362	ORTHOMCL357	ORTHOMCL357	ORTHOMCL357	ORTHOMCL360	ORTHOMCL358
ORTHOMCL356	ORTHOMCL371	ORTHOMCL359	ORTHOMCL380	ORTHOMCL358	ORTHOMCL363	ORTHOMCL358	ORTHOMCL358	ORTHOMCL358	ORTHOMCL361	ORTHOMCL359
ORTHOMCL357	ORTHOMCL372	ORTHOMCL360	ORTHOMCL381	ORTHOMCL359	ORTHOMCL364	ORTHOMCL359	ORTHOMCL359	ORTHOMCL359	ORTHOMCL362	ORTHOMCL360
ORTHOMCL358	ORTHOMCL373	ORTHOMCL361	ORTHOMCL382	ORTHOMCL360	ORTHOMCL365	ORTHOMCL360	ORTHOMCL360	ORTHOMCL360	ORTHOMCL363	ORTHOMCL361
ORTHOMCL359	ORTHOMCL374	ORTHOMCL362	ORTHOMCL383	ORTHOMCL361	ORTHOMCL366	ORTHOMCL361	ORTHOMCL361	ORTHOMCL361	ORTHOMCL364	ORTHOMCL362
ORTHOMCL360	ORTHOMCL375	ORTHOMCL363	ORTHOMCL384	ORTHOMCL362	ORTHOMCL367	ORTHOMCL362	ORTHOMCL362	ORTHOMCL362	ORTHOMCL366	ORTHOMCL363
ORTHOMCL361	ORTHOMCL376	ORTHOMCL364	ORTHOMCL385	ORTHOMCL363	ORTHOMCL368	ORTHOMCL363	ORTHOMCL363	ORTHOMCL363	ORTHOMCL367	ORTHOMCL364
ORTHOMCL362	ORTHOMCL377	ORTHOMCL365	ORTHOMCL387	ORTHOMCL364	ORTHOMCL369	ORTHOMCL364	ORTHOMCL364	ORTHOMCL364	ORTHOMCL368	ORTHOMCL365
ORTHOMCL363	ORTHOMCL378	ORTHOMCL366	ORTHOMCL388	ORTHOMCL365	ORTHOMCL370	ORTHOMCL365	ORTHOMCL365	ORTHOMCL365	ORTHOMCL369	ORTHOMCL366
ORTHOMCL364	ORTHOMCL379	ORTHOMCL367	ORTHOMCL389	ORTHOMCL366	ORTHOMCL371	ORTHOMCL366	ORTHOMCL366	ORTHOMCL366	ORTHOMCL370	ORTHOMCL367
ORTHOMCL365	ORTHOMCL380	ORTHOMCL368	ORTHOMCL390	ORTHOMCL367	ORTHOMCL372	ORTHOMCL367	ORTHOMCL367	ORTHOMCL367	ORTHOMCL371	ORTHOMCL368
ORTHOMCL366	ORTHOMCL381	ORTHOMCL369	ORTHOMCL391	ORTHOMCL368	ORTHOMCL373	ORTHOMCL368	ORTHOMCL368	ORTHOMCL368	ORTHOMCL372	ORTHOMCL369
ORTHOMCL367	ORTHOMCL382	ORTHOMCL370	ORTHOMCL392	ORTHOMCL369	ORTHOMCL374	ORTHOMCL369	ORTHOMCL369	ORTHOMCL369	ORTHOMCL373	ORTHOMCL370
ORTHOMCL368	ORTHOMCL383	ORTHOMCL371	ORTHOMCL393	ORTHOMCL370	ORTHOMCL375	ORTHOMCL370	ORTHOMCL370	ORTHOMCL370	ORTHOMCL374	ORTHOMCL371
ORTHOMCL369	ORTHOMCL384	ORTHOMCL372	ORTHOMCL394	ORTHOMCL371	ORTHOMCL376	ORTHOMCL371	ORTHOMCL371	ORTHOMCL371	ORTHOMCL375	ORTHOMCL372
ORTHOMCL370	ORTHOMCL385	ORTHOMCL373	ORTHOMCL395	ORTHOMCL372	ORTHOMCL377	ORTHOMCL372	ORTHOMCL372	ORTHOMCL372	ORTHOMCL376	ORTHOMCL373
ORTHOMCL371	ORTHOMCL386	ORTHOMCL374	ORTHOMCL396	ORTHOMCL373	ORTHOMCL378	ORTHOMCL373	ORTHOMCL373	ORTHOMCL373	ORTHOMCL377	ORTHOMCL374
ORTHOMCL372	ORTHOMCL387	ORTHOMCL375	ORTHOMCL397	ORTHOMCL374	ORTHOMCL379	ORTHOMCL374	ORTHOMCL374	ORTHOMCL374	ORTHOMCL378	ORTHOMCL375
ORTHOMCL373	ORTHOMCL388	ORTHOMCL376	ORTHOMCL398	ORTHOMCL375	ORTHOMCL380	ORTHOMCL375	ORTHOMCL375	ORTHOMCL375	ORTHOMCL379	ORTHOMCL376
ORTHOMCL374	ORTHOMCL389	ORTHOMCL377	ORTHOMCL399	ORTHOMCL376	ORTHOMCL381	ORTHOMCL376	ORTHOMCL376	ORTHOMCL376	ORTHOMCL380	ORTHOMCL377
ORTHOMCL375	ORTHOMCL390	ORTHOMCL378	ORTHOMCL400	ORTHOMCL377	ORTHOMCL382	ORTHOMCL377	ORTHOMCL377	ORTHOMCL377	ORTHOMCL381	ORTHOMCL378
ORTHOMCL376	ORTHOMCL391	ORTHOMCL379	ORTHOMCL401	ORTHOMCL378	ORTHOMCL383	ORTHOMCL378	ORTHOMCL378	ORTHOMCL378	ORTHOMCL382	ORTHOMCL379
ORTHOMCL377	ORTHOMCL392	ORTHOMCL380	ORTHOMCL402	ORTHOMCL379	ORTHOMCL384	ORTHOMCL379	ORTHOMCL379	ORTHOMCL379	ORTHOMCL383	ORTHOMCL380
ORTHOMCL378	ORTHOMCL393	ORTHOMCL381	ORTHOMCL403	ORTHOMCL380	ORTHOMCL385	ORTHOMCL380	ORTHOMCL380	ORTHOMCL380	ORTHOMCL384	ORTHOMCL381
ORTHOMCL379	ORTHOMCL394	ORTHOMCL382	ORTHOMCL404	ORTHOMCL381	ORTHOMCL386	ORTHOMCL381	ORTHOMCL381	ORTHOMCL381	ORTHOMCL385	ORTHOMCL382
ORTHOMCL380	ORTHOMCL395	ORTHOMCL383	ORTHOMCL405	ORTHOMCL382	ORTHOMCL387	ORTHOMCL382	ORTHOMCL382	ORTHOMCL382	ORTHOMCL386	ORTHOMCL383
ORTHOMCL381	ORTHOMCL397	ORTHOMCL384	ORTHOMCL406	ORTHOMCL383	ORTHOMCL388	ORTHOMCL383	ORTHOMCL383	ORTHOMCL383	ORTHOMCL387	ORTHOMCL384
ORTHOMCL382	ORTHOMCL398	ORTHOMCL385	ORTHOMCL407	ORTHOMCL384	ORTHOMCL389	ORTHOMCL384	ORTHOMCL384	ORTHOMCL384	ORTHOMCL388	ORTHOMCL385
ORTHOMCL383	ORTHOMCL399	ORTHOMCL386	ORTHOMCL408	ORTHOMCL385	ORTHOMCL390	ORTHOMCL385	ORTHOMCL385	ORTHOMCL385	ORTHOMCL389	ORTHOMCL386
ORTHOMCL384	ORTHOMCL400	ORTHOMCL387	ORTHOMCL410	ORTHOMCL386	ORTHOMCL391	ORTHOMCL386	ORTHOMCL386	ORTHOMCL386	ORTHOMCL390	ORTHOMCL387
ORTHOMCL385	ORTHOMCL401	ORTHOMCL388	ORTHOMCL411	ORTHOMCL387	ORTHOMCL392	ORTHOMCL387	ORTHOMCL387	ORTHOMCL387	ORTHOMCL391	ORTHOMCL388
ORTHOMCL386	ORTHOMCL402	ORTHOMCL389	ORTHOMCL412	ORTHOMCL388	ORTHOMCL393	ORTHOMCL388	ORTHOMCL388	ORTHOMCL388	ORTHOMCL392	ORTHOMCL389
ORTHOMCL387	ORTHOMCL403	ORTHOMCL390	ORTHOMCL413	ORTHOMCL389	ORTHOMCL394	ORTHOMCL389	ORTHOMCL389	ORTHOMCL389	ORTHOMCL393	ORTHOMCL390
ORTHOMCL388	ORTHOMCL404	ORTHOMCL391	ORTHOMCL414	ORTHOMCL390	ORTHOMCL395	ORTHOMCL390	ORTHOMCL390	ORTHOMCL390	ORTHOMCL394	ORTHOMCL391
ORTHOMCL389	ORTHOMCL405	ORTHOMCL392	ORTHOMCL415	ORTHOMCL391	ORTHOMCL396	ORTHOMCL391	ORTHOMCL391	ORTHOMCL391	ORTHOMCL395	ORTHOMCL392
ORTHOMCL390	ORTHOMCL407	ORTHOMCL393	ORTHOMCL416	ORTHOMCL392	ORTHOMCL397	ORTHOMCL392	ORTHOMCL392	ORTHOMCL392	ORTHOMCL396	ORTHOMCL393
ORTHOMCL391	ORTHOMCL408	ORTHOMCL394	ORTHOMCL417	ORTHOMCL393	ORTHOMCL398	ORTHOMCL393	ORTHOMCL393	ORTHOMCL393	ORTHOMCL397	ORTHOMCL394
ORTHOMCL392	ORTHOMCL409	ORTHOMCL395	ORTHOMCL418	ORTHOMCL394	ORTHOMCL399	ORTHOMCL394	ORTHOMCL394	ORTHOMCL394	ORTHOMCL398	ORTHOMCL395
ORTHOMCL393	ORTHOMCL410	ORTHOMCL396	ORTHOMCL419	ORTHOMCL395	ORTHOMCL400	ORTHOMCL395	ORTHOMCL395	ORTHOMCL395	ORTHOMCL399	ORTHOMCL396
ORTHOMCL394	ORTHOMCL411	ORTHOMCL397	ORTHOMCL420	ORTHOMCL396	ORTHOMCL401	ORTHOMCL396	ORTHOMCL396	ORTHOMCL396	ORTHOMCL400	ORTHOMCL397
ORTHOMCL395	ORTHOMCL412	ORTHOMCL398	ORTHOMCL422	ORTHOMCL397	ORTHOMCL402	ORTHOMCL397	ORTHOMCL397	ORTHOMCL397	ORTHOMCL401	ORTHOMCL398
ORTHOMCL396	ORTHOMCL413	ORTHOMCL399	ORTHOMCL423	ORTHOMCL398	ORTHOMCL403	ORTHOMCL398	ORTHOMCL398	ORTHOMCL398	ORTHOMCL402	ORTHOMCL399
ORTHOMCL397	ORTHOMCL414	ORTHOMCL400	ORTHOMCL425	ORTHOMCL399	ORTHOMCL404	ORTHOMCL399	ORTHOMCL399	ORTHOMCL399	ORTHOMCL403	ORTHOMCL400
ORTHOMCL398	ORTHOMCL415	ORTHOMCL401	ORTHOMCL426	ORTHOMCL400	ORTHOMCL405	ORTHOMCL400	ORTHOMCL400	ORTHOMCL400	ORTHOMCL404	ORTHOMCL401
ORTHOMCL399	ORTHOMCL416	ORTHOMCL402	ORTHOMCL427	ORTHOMCL401	ORTHOMCL406	ORTHOMCL401	ORTHOMCL401	ORTHOMCL401	ORTHOMCL405	ORTHOMCL402
ORTHOMCL400	ORTHOMCL417	ORTHOMCL403	ORTHOMCL428	ORTHOMCL402	ORTHOMCL407	ORTHOMCL403	ORTHOMCL402	ORTHOMCL402	ORTHOMCL406	ORTHOMCL403
ORTHOMCL401	ORTHOMCL418	ORTHOMCL404	ORTHOMCL429	ORTHOMCL403	ORTHOMCL408	ORTHOMCL404	ORTHOMCL403	ORTHOMCL403	ORTHOMCL407	ORTHOMCL404
ORTHOMCL402	ORTHOMCL419	ORTHOMCL405	ORTHOMCL430	ORTHOMCL404	ORTHOMCL409	ORTHOMCL405	ORTHOMCL404	ORTHOMCL404	ORTHOMCL408	ORTHOMCL405
ORTHOMCL403	ORTHOMCL420	ORTHOMCL406	ORTHOMCL431	ORTHOMCL405	ORTHOMCL410	ORTHOMCL406	ORTHOMCL405	ORTHOMCL405	ORTHOMCL409	ORTHOMCL406
ORTHOMCL404	ORTHOMCL421	ORTHOMCL407	ORTHOMCL432	ORTHOMCL406	ORTHOMCL411	ORTHOMCL407	ORTHOMCL406	ORTHOMCL406	ORTHOMCL410	ORTHOMCL407
ORTHOMCL405	ORTHOMCL422	ORTHOMCL408	ORTHOMCL433	ORTHOMCL407	ORTHOMCL412	ORTHOMCL408	ORTHOMCL407	ORTHOMCL407	ORTHOMCL411	ORTHOMCL408
ORTHOMCL406	ORTHOMCL423	ORTHOMCL409	ORTHOMCL434	ORTHOMCL408	ORTHOMCL413	ORTHOMCL409	ORTHOMCL408	ORTHOMCL408	ORTHOMCL412	ORTHOMCL409
ORTHOMCL407	ORTHOMCL424	ORTHOMCL410	ORTHOMCL435	ORTHOMCL409	ORTHOMCL414	ORTHOMCL410	ORTHOMCL409	ORTHOMCL409	ORTHOMCL413	ORTHOMCL410
ORTHOMCL408	ORTHOMCL425	ORTHOMCL411	ORTHOMCL436	ORTHOMCL410	ORTHOMCL415	ORTHOMCL411	ORTHOMCL410	ORTHOMCL410	ORTHOMCL414	ORTHOMCL411
ORTHOMCL409	ORTHOMCL426	ORTHOMCL412	ORTHOMCL437	ORTHOMCL411	ORTHOMCL416	ORTHOMCL412	ORTHOMCL411	ORTHOMCL411	ORTHOMCL415	ORTHOMCL412
ORTHOMCL410	ORTHOMCL427	ORTHOMCL413	ORTHOMCL438	ORTHOMCL412	ORTHOMCL418	ORTHOMCL413	ORTHOMCL412	ORTHOMCL412	ORTHOMCL416	ORTHOMCL413
ORTHOMCL411	ORTHOMCL428	ORTHOMCL414	ORTHOMCL439	ORTHOMCL413	ORTHOMCL419	ORTHOMCL414	ORTHOMCL413	ORTHOMCL413	ORTHOMCL417	ORTHOMCL414
ORTHOMCL412	ORTHOMCL429	ORTHOMCL415	ORTHOMCL440	ORTHOMCL414	ORTHOMCL420	ORTHOMCL415	ORTHOMCL414	ORTHOMCL414	ORTHOMCL418	ORTHOMCL415
ORTHOMCL413	ORTHOMCL430	ORTHOMCL416	ORTHOMCL441	ORTHOMCL415	ORTHOMCL421	ORTHOMCL416	ORTHOMCL415	ORTHOMCL415	ORTHOMCL419	ORTHOMCL416
ORTHOMCL414	ORTHOMCL431	ORTHOMCL417	ORTHOMCL442	ORTHOMCL416	ORTHOMCL422	ORTHOMCL417	ORTHOMCL416	ORTHOMCL416	ORTHOMCL420	ORTHOMCL417
ORTHOMCL415	ORTHOMCL432	ORTHOMCL418	ORTHOMCL443	ORTHOMCL418	ORTHOMCL423	ORTHOMCL418	ORTHOMCL417	ORTHOMCL417	ORTHOMCL421	ORTHOMCL418
ORTHOMCL416	ORTHOMCL433	ORTHOMCL419	ORTHOMCL444	ORTHOMCL419	ORTHOMCL424	ORTHOMCL419	ORTHOMCL418	ORTHOMCL418	ORTHOMCL422	ORTHOMCL419
ORTHOMCL417	ORTHOMCL434	ORTHOMCL420	ORTHOMCL445	ORTHOMCL420	ORTHOMCL425	ORTHOMCL420	ORTHOMCL419	ORTHOMCL419	ORTHOMCL423	ORTHOMCL420
ORTHOMCL418	ORTHOMCL435	ORTHOMCL421	ORTHOMCL446	ORTHOMCL421	ORTHOMCL426	ORTHOMCL421	ORTHOMCL420	ORTHOMCL420	ORTHOMCL424	ORTHOMCL422
ORTHOMCL419	ORTHOMCL436	ORTHOMCL422	ORTHOMCL447	ORTHOMCL422	ORTHOMCL428	ORTHOMCL422	ORTHOMCL421	ORTHOMCL421	ORTHOMCL425	ORTHOMCL423
ORTHOMCL420	ORTHOMCL437	ORTHOMCL423	ORTHOMCL448	ORTHOMCL423	ORTHOMCL429	ORTHOMCL423	ORTHOMCL422	ORTHOMCL422	ORTHOMCL426	ORTHOMCL424
ORTHOMCL422	ORTHOMCL438	ORTHOMCL424	ORTHOMCL449	ORTHOMCL426	ORTHOMCL430	ORTHOMCL424	ORTHOMCL423	ORTHOMCL423	ORTHOMCL427	ORTHOMCL425
ORTHOMCL423	ORTHOMCL439	ORTHOMCL425	ORTHOMCL450	ORTHOMCL427	ORTHOMCL431	ORTHOMCL426	ORTHOMCL424	ORTHOMCL424	ORTHOMCL428	ORTHOMCL426
ORTHOMCL424	ORTHOMCL440	ORTHOMCL426	ORTHOMCL451	ORTHOMCL428	ORTHOMCL432	ORTHOMCL427	ORTHOMCL425	ORTHOMCL425	ORTHOMCL429	ORTHOMCL427
ORTHOMCL425	ORTHOMCL441	ORTHOMCL427	ORTHOMCL452	ORTHOMCL429	ORTHOMCL433	ORTHOMCL428	ORTHOMCL427	ORTHOMCL426	ORTHOMCL430	ORTHOMCL428
ORTHOMCL426	ORTHOMCL442	ORTHOMCL428	ORTHOMCL453	ORTHOMCL430	ORTHOMCL434	ORTHOMCL429	ORTHOMCL428	ORTHOMCL427	ORTHOMCL431	ORTHOMCL429
ORTHOMCL427	ORTHOMCL444	ORTHOMCL429	ORTHOMCL454	ORTHOMCL431	ORTHOMCL435	ORTHOMCL430	ORTHOMCL430	ORTHOMCL428	ORTHOMCL432	ORTHOMCL430
ORTHOMCL428	ORTHOMCL445	ORTHOMCL430	ORTHOMCL455	ORTHOMCL432	ORTHOMCL436	ORTHOMCL431	ORTHOMCL431	ORTHOMCL429	ORTHOMCL433	ORTHOMCL431
ORTHOMCL430	ORTHOMCL446	ORTHOMCL431	ORTHOMCL456	ORTHOMCL433	ORTHOMCL437	ORTHOMCL432	ORTHOMCL432	ORTHOMCL430	ORTHOMCL434	ORTHOMCL432
ORTHOMCL431	ORTHOMCL447	ORTHOMCL432	ORTHOMCL457	ORTHOMCL434	ORTHOMCL438	ORTHOMCL433	ORTHOMCL433	ORTHOMCL431	ORTHOMCL435	ORTHOMCL433
ORTHOMCL432	ORTHOMCL448	ORTHOMCL433	ORTHOMCL458	ORTHOMCL435	ORTHOMCL439	ORTHOMCL434	ORTHOMCL434	ORTHOMCL432	ORTHOMCL436	ORTHOMCL434
ORTHOMCL433	ORTHOMCL449	ORTHOMCL434	ORTHOMCL459	ORTHOMCL436	ORTHOMCL440	ORTHOMCL435	ORTHOMCL435	ORTHOMCL433	ORTHOMCL437	ORTHOMCL435
ORTHOMCL434	ORTHOMCL450	ORTHOMCL435	ORTHOMCL461	ORTHOMCL437	ORTHOMCL441	ORTHOMCL436	ORTHOMCL436	ORTHOMCL434	ORTHOMCL438	ORTHOMCL436
ORTHOMCL435	ORTHOMCL452	ORTHOMCL436	ORTHOMCL462	ORTHOMCL438	ORTHOMCL442	ORTHOMCL437	ORTHOMCL437	ORTHOMCL435	ORTHOMCL439	ORTHOMCL437
ORTHOMCL436	ORTHOMCL453	ORTHOMCL437	ORTHOMCL464	ORTHOMCL439	ORTHOMCL443	ORTHOMCL438	ORTHOMCL438	ORTHOMCL436	ORTHOMCL440	ORTHOMCL438
ORTHOMCL437	ORTHOMCL454	ORTHOMCL438	ORTHOMCL466	ORTHOMCL440	ORTHOMCL444	ORTHOMCL439	ORTHOMCL439	ORTHOMCL437	ORTHOMCL441	ORTHOMCL439
ORTHOMCL438	ORTHOMCL455	ORTHOMCL439	ORTHOMCL467	ORTHOMCL441	ORTHOMCL445	ORTHOMCL440	ORTHOMCL440	ORTHOMCL438	ORTHOMCL442	ORTHOMCL440
ORTHOMCL439	ORTHOMCL456	ORTHOMCL440	ORTHOMCL468	ORTHOMCL442	ORTHOMCL446	ORTHOMCL441	ORTHOMCL441	ORTHOMCL439	ORTHOMCL443	ORTHOMCL441
ORTHOMCL440	ORTHOMCL458	ORTHOMCL441	ORTHOMCL469	ORTHOMCL443	ORTHOMCL447	ORTHOMCL442	ORTHOMCL442	ORTHOMCL440	ORTHOMCL444	ORTHOMCL442
ORTHOMCL441	ORTHOMCL459	ORTHOMCL442	ORTHOMCL470	ORTHOMCL444	ORTHOMCL448	ORTHOMCL443	ORTHOMCL443	ORTHOMCL441	ORTHOMCL445	ORTHOMCL443
ORTHOMCL442	ORTHOMCL461	ORTHOMCL443	ORTHOMCL471	ORTHOMCL445	ORTHOMCL449	ORTHOMCL444	ORTHOMCL444	ORTHOMCL442	ORTHOMCL446	ORTHOMCL444
ORTHOMCL443	ORTHOMCL462	ORTHOMCL444	ORTHOMCL472	ORTHOMCL446	ORTHOMCL450	ORTHOMCL445	ORTHOMCL445	ORTHOMCL443	ORTHOMCL447	ORTHOMCL445
ORTHOMCL444	ORTHOMCL463	ORTHOMCL445	ORTHOMCL473	ORTHOMCL447	ORTHOMCL451	ORTHOMCL446	ORTHOMCL446	ORTHOMCL444	ORTHOMCL448	ORTHOMCL446
ORTHOMCL445	ORTHOMCL464	ORTHOMCL446	ORTHOMCL474	ORTHOMCL448	ORTHOMCL452	ORTHOMCL447	ORTHOMCL447	ORTHOMCL445	ORTHOMCL449	ORTHOMCL447
ORTHOMCL446	ORTHOMCL465	ORTHOMCL447	ORTHOMCL475	ORTHOMCL449	ORTHOMCL453	ORTHOMCL448	ORTHOMCL448	ORTHOMCL446	ORTHOMCL450	ORTHOMCL448
ORTHOMCL447	ORTHOMCL466	ORTHOMCL448	ORTHOMCL476	ORTHOMCL450	ORTHOMCL454	ORTHOMCL449	ORTHOMCL449	ORTHOMCL447	ORTHOMCL451	ORTHOMCL449
ORTHOMCL448	ORTHOMCL467	ORTHOMCL449	ORTHOMCL477	ORTHOMCL451	ORTHOMCL455	ORTHOMCL450	ORTHOMCL450	ORTHOMCL448	ORTHOMCL452	ORTHOMCL450
ORTHOMCL449	ORTHOMCL468	ORTHOMCL450	ORTHOMCL478	ORTHOMCL452	ORTHOMCL456	ORTHOMCL451	ORTHOMCL451	ORTHOMCL449	ORTHOMCL453	ORTHOMCL451
ORTHOMCL450	ORTHOMCL469	ORTHOMCL451	ORTHOMCL479	ORTHOMCL453	ORTHOMCL457	ORTHOMCL452	ORTHOMCL452	ORTHOMCL450	ORTHOMCL454	ORTHOMCL452
ORTHOMCL451	ORTHOMCL470	ORTHOMCL452	ORTHOMCL480	ORTHOMCL454	ORTHOMCL458	ORTHOMCL453	ORTHOMCL453	ORTHOMCL451	ORTHOMCL455	ORTHOMCL453
ORTHOMCL452	ORTHOMCL471	ORTHOMCL453	ORTHOMCL481	ORTHOMCL456	ORTHOMCL459	ORTHOMCL454	ORTHOMCL454	ORTHOMCL452	ORTHOMCL456	ORTHOMCL454
ORTHOMCL453	ORTHOMCL472	ORTHOMCL454	ORTHOMCL482	ORTHOMCL457	ORTHOMCL461	ORTHOMCL455	ORTHOMCL455	ORTHOMCL453	ORTHOMCL457	ORTHOMCL455
ORTHOMCL454	ORTHOMCL473	ORTHOMCL455	ORTHOMCL483	ORTHOMCL458	ORTHOMCL462	ORTHOMCL456	ORTHOMCL456	ORTHOMCL454	ORTHOMCL458	ORTHOMCL456
ORTHOMCL455	ORTHOMCL474	ORTHOMCL456	ORTHOMCL484	ORTHOMCL459	ORTHOMCL463	ORTHOMCL457	ORTHOMCL457	ORTHOMCL455	ORTHOMCL459	ORTHOMCL457
ORTHOMCL456	ORTHOMCL476	ORTHOMCL457	ORTHOMCL485	ORTHOMCL461	ORTHOMCL464	ORTHOMCL458	ORTHOMCL458	ORTHOMCL456	ORTHOMCL460	ORTHOMCL458
ORTHOMCL457	ORTHOMCL477	ORTHOMCL458	ORTHOMCL486	ORTHOMCL462	ORTHOMCL465	ORTHOMCL459	ORTHOMCL459	ORTHOMCL457	ORTHOMCL461	ORTHOMCL459
ORTHOMCL458	ORTHOMCL478	ORTHOMCL459	ORTHOMCL487	ORTHOMCL463	ORTHOMCL466	ORTHOMCL460	ORTHOMCL460	ORTHOMCL458	ORTHOMCL462	ORTHOMCL460
ORTHOMCL459	ORTHOMCL479	ORTHOMCL460	ORTHOMCL488	ORTHOMCL464	ORTHOMCL467	ORTHOMCL461	ORTHOMCL461	ORTHOMCL459	ORTHOMCL463	ORTHOMCL461
ORTHOMCL460	ORTHOMCL480	ORTHOMCL461	ORTHOMCL489	ORTHOMCL465	ORTHOMCL468	ORTHOMCL462	ORTHOMCL462	ORTHOMCL460	ORTHOMCL464	ORTHOMCL462
ORTHOMCL461	ORTHOMCL481	ORTHOMCL462	ORTHOMCL490	ORTHOMCL466	ORTHOMCL469	ORTHOMCL463	ORTHOMCL463	ORTHOMCL461	ORTHOMCL465	ORTHOMCL463
ORTHOMCL462	ORTHOMCL482	ORTHOMCL464	ORTHOMCL491	ORTHOMCL467	ORTHOMCL470	ORTHOMCL464	ORTHOMCL464	ORTHOMCL462	ORTHOMCL466	ORTHOMCL464
ORTHOMCL463	ORTHOMCL483	ORTHOMCL465	ORTHOMCL492	ORTHOMCL468	ORTHOMCL471	ORTHOMCL466	ORTHOMCL465	ORTHOMCL463	ORTHOMCL467	ORTHOMCL466
ORTHOMCL464	ORTHOMCL484	ORTHOMCL466	ORTHOMCL493	ORTHOMCL469	ORTHOMCL472	ORTHOMCL467	ORTHOMCL466	ORTHOMCL464	ORTHOMCL468	ORTHOMCL467
ORTHOMCL465	ORTHOMCL485	ORTHOMCL467	ORTHOMCL494	ORTHOMCL470	ORTHOMCL473	ORTHOMCL468	ORTHOMCL467	ORTHOMCL465	ORTHOMCL469	ORTHOMCL468
ORTHOMCL466	ORTHOMCL486	ORTHOMCL468	ORTHOMCL495	ORTHOMCL471	ORTHOMCL474	ORTHOMCL469	ORTHOMCL468	ORTHOMCL466	ORTHOMCL470	ORTHOMCL469
ORTHOMCL467	ORTHOMCL487	ORTHOMCL469	ORTHOMCL496	ORTHOMCL472	ORTHOMCL475	ORTHOMCL470	ORTHOMCL469	ORTHOMCL467	ORTHOMCL471	ORTHOMCL470
ORTHOMCL468	ORTHOMCL488	ORTHOMCL470	ORTHOMCL497	ORTHOMCL473	ORTHOMCL476	ORTHOMCL471	ORTHOMCL470	ORTHOMCL468	ORTHOMCL472	ORTHOMCL471
ORTHOMCL469	ORTHOMCL489	ORTHOMCL471	ORTHOMCL498	ORTHOMCL474	ORTHOMCL477	ORTHOMCL472	ORTHOMCL471	ORTHOMCL469	ORTHOMCL473	ORTHOMCL472
ORTHOMCL470	ORTHOMCL490	ORTHOMCL473	ORTHOMCL499	ORTHOMCL475	ORTHOMCL478	ORTHOMCL473	ORTHOMCL472	ORTHOMCL470	ORTHOMCL474	ORTHOMCL473
ORTHOMCL471	ORTHOMCL491	ORTHOMCL474	ORTHOMCL500	ORTHOMCL476	ORTHOMCL479	ORTHOMCL474	ORTHOMCL474	ORTHOMCL471	ORTHOMCL475	ORTHOMCL474
ORTHOMCL472	ORTHOMCL492	ORTHOMCL475	ORTHOMCL501	ORTHOMCL477	ORTHOMCL480	ORTHOMCL475	ORTHOMCL475	ORTHOMCL472	ORTHOMCL476	ORTHOMCL475
ORTHOMCL473	ORTHOMCL493	ORTHOMCL476	ORTHOMCL502	ORTHOMCL478	ORTHOMCL481	ORTHOMCL476	ORTHOMCL476	ORTHOMCL473	ORTHOMCL477	ORTHOMCL476
ORTHOMCL474	ORTHOMCL494	ORTHOMCL477	ORTHOMCL503	ORTHOMCL479	ORTHOMCL482	ORTHOMCL477	ORTHOMCL477	ORTHOMCL474	ORTHOMCL478	ORTHOMCL477
ORTHOMCL475	ORTHOMCL495	ORTHOMCL478	ORTHOMCL504	ORTHOMCL480	ORTHOMCL483	ORTHOMCL478	ORTHOMCL478	ORTHOMCL475	ORTHOMCL479	ORTHOMCL478
ORTHOMCL476	ORTHOMCL496	ORTHOMCL479	ORTHOMCL505	ORTHOMCL481	ORTHOMCL484	ORTHOMCL479	ORTHOMCL479	ORTHOMCL476	ORTHOMCL480	ORTHOMCL479
ORTHOMCL477	ORTHOMCL497	ORTHOMCL480	ORTHOMCL506	ORTHOMCL482	ORTHOMCL485	ORTHOMCL480	ORTHOMCL480	ORTHOMCL477	ORTHOMCL481	ORTHOMCL480
ORTHOMCL478	ORTHOMCL498	ORTHOMCL481	ORTHOMCL507	ORTHOMCL483	ORTHOMCL486	ORTHOMCL481	ORTHOMCL481	ORTHOMCL478	ORTHOMCL482	ORTHOMCL481
ORTHOMCL479	ORTHOMCL499	ORTHOMCL482	ORTHOMCL508	ORTHOMCL484	ORTHOMCL487	ORTHOMCL482	ORTHOMCL482	ORTHOMCL479	ORTHOMCL483	ORTHOMCL482
ORTHOMCL480	ORTHOMCL500	ORTHOMCL483	ORTHOMCL509	ORTHOMCL485	ORTHOMCL488	ORTHOMCL483	ORTHOMCL483	ORTHOMCL480	ORTHOMCL484	ORTHOMCL483
ORTHOMCL481	ORTHOMCL501	ORTHOMCL484	ORTHOMCL510	ORTHOMCL486	ORTHOMCL489	ORTHOMCL484	ORTHOMCL484	ORTHOMCL481	ORTHOMCL485	ORTHOMCL484
ORTHOMCL482	ORTHOMCL502	ORTHOMCL485	ORTHOMCL511	ORTHOMCL487	ORTHOMCL490	ORTHOMCL485	ORTHOMCL485	ORTHOMCL482	ORTHOMCL486	ORTHOMCL485
ORTHOMCL483	ORTHOMCL503	ORTHOMCL486	ORTHOMCL512	ORTHOMCL488	ORTHOMCL491	ORTHOMCL486	ORTHOMCL486	ORTHOMCL483	ORTHOMCL487	ORTHOMCL486
ORTHOMCL484	ORTHOMCL504	ORTHOMCL487	ORTHOMCL513	ORTHOMCL489	ORTHOMCL492	ORTHOMCL487	ORTHOMCL487	ORTHOMCL484	ORTHOMCL488	ORTHOMCL487
ORTHOMCL485	ORTHOMCL505	ORTHOMCL488	ORTHOMCL514	ORTHOMCL490	ORTHOMCL493	ORTHOMCL488	ORTHOMCL488	ORTHOMCL485	ORTHOMCL489	ORTHOMCL488
ORTHOMCL486	ORTHOMCL506	ORTHOMCL489	ORTHOMCL515	ORTHOMCL491	ORTHOMCL494	ORTHOMCL489	ORTHOMCL489	ORTHOMCL486	ORTHOMCL490	ORTHOMCL489
ORTHOMCL487	ORTHOMCL507	ORTHOMCL490	ORTHOMCL516	ORTHOMCL492	ORTHOMCL495	ORTHOMCL490	ORTHOMCL490	ORTHOMCL487	ORTHOMCL491	ORTHOMCL490
ORTHOMCL488	ORTHOMCL508	ORTHOMCL491	ORTHOMCL517	ORTHOMCL493	ORTHOMCL496	ORTHOMCL491	ORTHOMCL491	ORTHOMCL488	ORTHOMCL492	ORTHOMCL491
ORTHOMCL489	ORTHOMCL509	ORTHOMCL492	ORTHOMCL518	ORTHOMCL494	ORTHOMCL497	ORTHOMCL492	ORTHOMCL492	ORTHOMCL489	ORTHOMCL493	ORTHOMCL492
ORTHOMCL490	ORTHOMCL510	ORTHOMCL493	ORTHOMCL519	ORTHOMCL495	ORTHOMCL498	ORTHOMCL493	ORTHOMCL493	ORTHOMCL490	ORTHOMCL494	ORTHOMCL493
ORTHOMCL491	ORTHOMCL511	ORTHOMCL494	ORTHOMCL520	ORTHOMCL496	ORTHOMCL499	ORTHOMCL494	ORTHOMCL494	ORTHOMCL491	ORTHOMCL495	ORTHOMCL494
ORTHOMCL492	ORTHOMCL512	ORTHOMCL495	ORTHOMCL521	ORTHOMCL497	ORTHOMCL500	ORTHOMCL495	ORTHOMCL495	ORTHOMCL492	ORTHOMCL496	ORTHOMCL495
ORTHOMCL493	ORTHOMCL513	ORTHOMCL496	ORTHOMCL523	ORTHOMCL498	ORTHOMCL501	ORTHOMCL496	ORTHOMCL496	ORTHOMCL493	ORTHOMCL497	ORTHOMCL496
ORTHOMCL494	ORTHOMCL514	ORTHOMCL497	ORTHOMCL524	ORTHOMCL499	ORTHOMCL502	ORTHOMCL497	ORTHOMCL497	ORTHOMCL494	ORTHOMCL498	ORTHOMCL497
ORTHOMCL495	ORTHOMCL515	ORTHOMCL498	ORTHOMCL525	ORTHOMCL500	ORTHOMCL503	ORTHOMCL498	ORTHOMCL498	ORTHOMCL495	ORTHOMCL499	ORTHOMCL498
ORTHOMCL496	ORTHOMCL516	ORTHOMCL499	ORTHOMCL526	ORTHOMCL501	ORTHOMCL504	ORTHOMCL499	ORTHOMCL499	ORTHOMCL496	ORTHOMCL500	ORTHOMCL499
ORTHOMCL497	ORTHOMCL517	ORTHOMCL500	ORTHOMCL527	ORTHOMCL502	ORTHOMCL505	ORTHOMCL500	ORTHOMCL500	ORTHOMCL498	ORTHOMCL501	ORTHOMCL500
ORTHOMCL498	ORTHOMCL518	ORTHOMCL501	ORTHOMCL528	ORTHOMCL503	ORTHOMCL506	ORTHOMCL501	ORTHOMCL501	ORTHOMCL499	ORTHOMCL502	ORTHOMCL501
ORTHOMCL499	ORTHOMCL519	ORTHOMCL502	ORTHOMCL529	ORTHOMCL504	ORTHOMCL507	ORTHOMCL502	ORTHOMCL502	ORTHOMCL500	ORTHOMCL503	ORTHOMCL502
ORTHOMCL500	ORTHOMCL520	ORTHOMCL503	ORTHOMCL530	ORTHOMCL505	ORTHOMCL508	ORTHOMCL503	ORTHOMCL503	ORTHOMCL501	ORTHOMCL504	ORTHOMCL503
ORTHOMCL501	ORTHOMCL521	ORTHOMCL504	ORTHOMCL531	ORTHOMCL506	ORTHOMCL509	ORTHOMCL504	ORTHOMCL504	ORTHOMCL502	ORTHOMCL505	ORTHOMCL504
ORTHOMCL503	ORTHOMCL523	ORTHOMCL505	ORTHOMCL532	ORTHOMCL507	ORTHOMCL510	ORTHOMCL505	ORTHOMCL505	ORTHOMCL503	ORTHOMCL506	ORTHOMCL505
ORTHOMCL504	ORTHOMCL524	ORTHOMCL506	ORTHOMCL533	ORTHOMCL508	ORTHOMCL511	ORTHOMCL506	ORTHOMCL506	ORTHOMCL504	ORTHOMCL507	ORTHOMCL506
ORTHOMCL505	ORTHOMCL525	ORTHOMCL507	ORTHOMCL534	ORTHOMCL509	ORTHOMCL512	ORTHOMCL507	ORTHOMCL507	ORTHOMCL505	ORTHOMCL508	ORTHOMCL507
ORTHOMCL506	ORTHOMCL526	ORTHOMCL508	ORTHOMCL535	ORTHOMCL510	ORTHOMCL513	ORTHOMCL508	ORTHOMCL508	ORTHOMCL506	ORTHOMCL509	ORTHOMCL508
ORTHOMCL507	ORTHOMCL527	ORTHOMCL509	ORTHOMCL536	ORTHOMCL511	ORTHOMCL514	ORTHOMCL509	ORTHOMCL509	ORTHOMCL507	ORTHOMCL510	ORTHOMCL509
ORTHOMCL508	ORTHOMCL528	ORTHOMCL510	ORTHOMCL537	ORTHOMCL512	ORTHOMCL515	ORTHOMCL510	ORTHOMCL510	ORTHOMCL508	ORTHOMCL511	ORTHOMCL510
ORTHOMCL509	ORTHOMCL529	ORTHOMCL511	ORTHOMCL539	ORTHOMCL513	ORTHOMCL516	ORTHOMCL511	ORTHOMCL511	ORTHOMCL509	ORTHOMCL512	ORTHOMCL511
ORTHOMCL510	ORTHOMCL530	ORTHOMCL512	ORTHOMCL540	ORTHOMCL514	ORTHOMCL517	ORTHOMCL512	ORTHOMCL512	ORTHOMCL510	ORTHOMCL513	ORTHOMCL512
ORTHOMCL511	ORTHOMCL531	ORTHOMCL513	ORTHOMCL541	ORTHOMCL515	ORTHOMCL518	ORTHOMCL513	ORTHOMCL513	ORTHOMCL511	ORTHOMCL514	ORTHOMCL513
ORTHOMCL512	ORTHOMCL532	ORTHOMCL514	ORTHOMCL542	ORTHOMCL516	ORTHOMCL519	ORTHOMCL514	ORTHOMCL514	ORTHOMCL512	ORTHOMCL515	ORTHOMCL514
ORTHOMCL513	ORTHOMCL533	ORTHOMCL515	ORTHOMCL543	ORTHOMCL517	ORTHOMCL520	ORTHOMCL515	ORTHOMCL515	ORTHOMCL513	ORTHOMCL516	ORTHOMCL515
ORTHOMCL514	ORTHOMCL534	ORTHOMCL516	ORTHOMCL544	ORTHOMCL518	ORTHOMCL521	ORTHOMCL516	ORTHOMCL516	ORTHOMCL514	ORTHOMCL517	ORTHOMCL516
ORTHOMCL515	ORTHOMCL535	ORTHOMCL517	ORTHOMCL545	ORTHOMCL519	ORTHOMCL522	ORTHOMCL517	ORTHOMCL517	ORTHOMCL515	ORTHOMCL518	ORTHOMCL517
ORTHOMCL516	ORTHOMCL536	ORTHOMCL518	ORTHOMCL546	ORTHOMCL520	ORTHOMCL523	ORTHOMCL518	ORTHOMCL518	ORTHOMCL516	ORTHOMCL519	ORTHOMCL518
ORTHOMCL517	ORTHOMCL537	ORTHOMCL519	ORTHOMCL547	ORTHOMCL521	ORTHOMCL524	ORTHOMCL519	ORTHOMCL519	ORTHOMCL517	ORTHOMCL520	ORTHOMCL519
ORTHOMCL518	ORTHOMCL538	ORTHOMCL520	ORTHOMCL548	ORTHOMCL522	ORTHOMCL525	ORTHOMCL520	ORTHOMCL520	ORTHOMCL518	ORTHOMCL521	ORTHOMCL520
ORTHOMCL519	ORTHOMCL539	ORTHOMCL521	ORTHOMCL549	ORTHOMCL523	ORTHOMCL526	ORTHOMCL521	ORTHOMCL521	ORTHOMCL519	ORTHOMCL522	ORTHOMCL521
ORTHOMCL520	ORTHOMCL540	ORTHOMCL522	ORTHOMCL550	ORTHOMCL524	ORTHOMCL527	ORTHOMCL522	ORTHOMCL522	ORTHOMCL520	ORTHOMCL523	ORTHOMCL522
ORTHOMCL521	ORTHOMCL541	ORTHOMCL523	ORTHOMCL551	ORTHOMCL525	ORTHOMCL528	ORTHOMCL523	ORTHOMCL523	ORTHOMCL521	ORTHOMCL524	ORTHOMCL523
ORTHOMCL522	ORTHOMCL542	ORTHOMCL524	ORTHOMCL552	ORTHOMCL526	ORTHOMCL529	ORTHOMCL524	ORTHOMCL524	ORTHOMCL522	ORTHOMCL525	ORTHOMCL524
ORTHOMCL523	ORTHOMCL543	ORTHOMCL525	ORTHOMCL553	ORTHOMCL527	ORTHOMCL530	ORTHOMCL525	ORTHOMCL525	ORTHOMCL523	ORTHOMCL526	ORTHOMCL525
ORTHOMCL524	ORTHOMCL544	ORTHOMCL526	ORTHOMCL554	ORTHOMCL528	ORTHOMCL531	ORTHOMCL526	ORTHOMCL526	ORTHOMCL524	ORTHOMCL527	ORTHOMCL526
ORTHOMCL525	ORTHOMCL545	ORTHOMCL527	ORTHOMCL555	ORTHOMCL529	ORTHOMCL532	ORTHOMCL527	ORTHOMCL527	ORTHOMCL525	ORTHOMCL528	ORTHOMCL527
ORTHOMCL526	ORTHOMCL546	ORTHOMCL528	ORTHOMCL556	ORTHOMCL530	ORTHOMCL533	ORTHOMCL528	ORTHOMCL528	ORTHOMCL526	ORTHOMCL529	ORTHOMCL528
ORTHOMCL527	ORTHOMCL547	ORTHOMCL529	ORTHOMCL557	ORTHOMCL531	ORTHOMCL534	ORTHOMCL529	ORTHOMCL529	ORTHOMCL527	ORTHOMCL530	ORTHOMCL529
ORTHOMCL528	ORTHOMCL548	ORTHOMCL530	ORTHOMCL558	ORTHOMCL534	ORTHOMCL535	ORTHOMCL530	ORTHOMCL530	ORTHOMCL528	ORTHOMCL531	ORTHOMCL530
ORTHOMCL529	ORTHOMCL549	ORTHOMCL531	ORTHOMCL559	ORTHOMCL535	ORTHOMCL536	ORTHOMCL531	ORTHOMCL531	ORTHOMCL529	ORTHOMCL532	ORTHOMCL531
ORTHOMCL530	ORTHOMCL550	ORTHOMCL532	ORTHOMCL560	ORTHOMCL536	ORTHOMCL537	ORTHOMCL532	ORTHOMCL532	ORTHOMCL530	ORTHOMCL533	ORTHOMCL532
ORTHOMCL531	ORTHOMCL551	ORTHOMCL533	ORTHOMCL561	ORTHOMCL537	ORTHOMCL538	ORTHOMCL533	ORTHOMCL533	ORTHOMCL531	ORTHOMCL534	ORTHOMCL533
ORTHOMCL532	ORTHOMCL552	ORTHOMCL534	ORTHOMCL562	ORTHOMCL538	ORTHOMCL539	ORTHOMCL534	ORTHOMCL534	ORTHOMCL532	ORTHOMCL535	ORTHOMCL534
ORTHOMCL533	ORTHOMCL553	ORTHOMCL535	ORTHOMCL563	ORTHOMCL539	ORTHOMCL540	ORTHOMCL535	ORTHOMCL535	ORTHOMCL533	ORTHOMCL536	ORTHOMCL535
ORTHOMCL534	ORTHOMCL554	ORTHOMCL536	ORTHOMCL566	ORTHOMCL540	ORTHOMCL541	ORTHOMCL536	ORTHOMCL536	ORTHOMCL534	ORTHOMCL537	ORTHOMCL537
ORTHOMCL535	ORTHOMCL555	ORTHOMCL537	ORTHOMCL567	ORTHOMCL541	ORTHOMCL542	ORTHOMCL537	ORTHOMCL537	ORTHOMCL535	ORTHOMCL538	ORTHOMCL539
ORTHOMCL536	ORTHOMCL556	ORTHOMCL538	ORTHOMCL568	ORTHOMCL542	ORTHOMCL543	ORTHOMCL538	ORTHOMCL538	ORTHOMCL536	ORTHOMCL539	ORTHOMCL540
ORTHOMCL537	ORTHOMCL557	ORTHOMCL539	ORTHOMCL569	ORTHOMCL543	ORTHOMCL544	ORTHOMCL539	ORTHOMCL539	ORTHOMCL537	ORTHOMCL540	ORTHOMCL541
ORTHOMCL538	ORTHOMCL558	ORTHOMCL540	ORTHOMCL571	ORTHOMCL544	ORTHOMCL545	ORTHOMCL540	ORTHOMCL540	ORTHOMCL538	ORTHOMCL541	ORTHOMCL542
ORTHOMCL539	ORTHOMCL559	ORTHOMCL541	ORTHOMCL572	ORTHOMCL545	ORTHOMCL546	ORTHOMCL541	ORTHOMCL541	ORTHOMCL539	ORTHOMCL542	ORTHOMCL543
ORTHOMCL540	ORTHOMCL560	ORTHOMCL542	ORTHOMCL573	ORTHOMCL546	ORTHOMCL547	ORTHOMCL542	ORTHOMCL542	ORTHOMCL540	ORTHOMCL543	ORTHOMCL544
ORTHOMCL541	ORTHOMCL561	ORTHOMCL543	ORTHOMCL574	ORTHOMCL547	ORTHOMCL548	ORTHOMCL543	ORTHOMCL543	ORTHOMCL541	ORTHOMCL544	ORTHOMCL545
ORTHOMCL542	ORTHOMCL562	ORTHOMCL544	ORTHOMCL575	ORTHOMCL548	ORTHOMCL549	ORTHOMCL544	ORTHOMCL544	ORTHOMCL542	ORTHOMCL545	ORTHOMCL546
ORTHOMCL543	ORTHOMCL563	ORTHOMCL545	ORTHOMCL576	ORTHOMCL549	ORTHOMCL550	ORTHOMCL545	ORTHOMCL545	ORTHOMCL543	ORTHOMCL546	ORTHOMCL547
ORTHOMCL544	ORTHOMCL564	ORTHOMCL546	ORTHOMCL578	ORTHOMCL550	ORTHOMCL551	ORTHOMCL546	ORTHOMCL546	ORTHOMCL544	ORTHOMCL547	ORTHOMCL548
ORTHOMCL545	ORTHOMCL567	ORTHOMCL547	ORTHOMCL579	ORTHOMCL551	ORTHOMCL552	ORTHOMCL547	ORTHOMCL547	ORTHOMCL545	ORTHOMCL548	ORTHOMCL549
ORTHOMCL546	ORTHOMCL568	ORTHOMCL548	ORTHOMCL580	ORTHOMCL552	ORTHOMCL553	ORTHOMCL548	ORTHOMCL548	ORTHOMCL546	ORTHOMCL549	ORTHOMCL550
ORTHOMCL547	ORTHOMCL569	ORTHOMCL549	ORTHOMCL581	ORTHOMCL553	ORTHOMCL554	ORTHOMCL549	ORTHOMCL549	ORTHOMCL547	ORTHOMCL550	ORTHOMCL551
ORTHOMCL548	ORTHOMCL571	ORTHOMCL550	ORTHOMCL582	ORTHOMCL554	ORTHOMCL555	ORTHOMCL550	ORTHOMCL550	ORTHOMCL548	ORTHOMCL551	ORTHOMCL552
ORTHOMCL549	ORTHOMCL572	ORTHOMCL551	ORTHOMCL583	ORTHOMCL556	ORTHOMCL556	ORTHOMCL551	ORTHOMCL551	ORTHOMCL549	ORTHOMCL552	ORTHOMCL553
ORTHOMCL550	ORTHOMCL573	ORTHOMCL552	ORTHOMCL584	ORTHOMCL557	ORTHOMCL557	ORTHOMCL553	ORTHOMCL552	ORTHOMCL550	ORTHOMCL553	ORTHOMCL554
ORTHOMCL551	ORTHOMCL574	ORTHOMCL553	ORTHOMCL585	ORTHOMCL558	ORTHOMCL558	ORTHOMCL554	ORTHOMCL553	ORTHOMCL551	ORTHOMCL554	ORTHOMCL555
ORTHOMCL552	ORTHOMCL575	ORTHOMCL554	ORTHOMCL586	ORTHOMCL559	ORTHOMCL559	ORTHOMCL555	ORTHOMCL554	ORTHOMCL552	ORTHOMCL555	ORTHOMCL556
ORTHOMCL553	ORTHOMCL576	ORTHOMCL555	ORTHOMCL587	ORTHOMCL560	ORTHOMCL560	ORTHOMCL556	ORTHOMCL555	ORTHOMCL553	ORTHOMCL556	ORTHOMCL557
ORTHOMCL554	ORTHOMCL578	ORTHOMCL556	ORTHOMCL588	ORTHOMCL561	ORTHOMCL561	ORTHOMCL557	ORTHOMCL556	ORTHOMCL554	ORTHOMCL557	ORTHOMCL558
ORTHOMCL555	ORTHOMCL579	ORTHOMCL557	ORTHOMCL589	ORTHOMCL562	ORTHOMCL562	ORTHOMCL558	ORTHOMCL557	ORTHOMCL555	ORTHOMCL558	ORTHOMCL559
ORTHOMCL556	ORTHOMCL580	ORTHOMCL558	ORTHOMCL590	ORTHOMCL563	ORTHOMCL563	ORTHOMCL559	ORTHOMCL558	ORTHOMCL556	ORTHOMCL559	ORTHOMCL560
ORTHOMCL557	ORTHOMCL581	ORTHOMCL559	ORTHOMCL591	ORTHOMCL564	ORTHOMCL564	ORTHOMCL560	ORTHOMCL559	ORTHOMCL557	ORTHOMCL560	ORTHOMCL561
ORTHOMCL558	ORTHOMCL582	ORTHOMCL560	ORTHOMCL592	ORTHOMCL565	ORTHOMCL565	ORTHOMCL561	ORTHOMCL560	ORTHOMCL558	ORTHOMCL561	ORTHOMCL562
ORTHOMCL559	ORTHOMCL583	ORTHOMCL561	ORTHOMCL593	ORTHOMCL566	ORTHOMCL566	ORTHOMCL562	ORTHOMCL561	ORTHOMCL559	ORTHOMCL562	ORTHOMCL563
ORTHOMCL560	ORTHOMCL584	ORTHOMCL562	ORTHOMCL594	ORTHOMCL567	ORTHOMCL567	ORTHOMCL563	ORTHOMCL562	ORTHOMCL560	ORTHOMCL563	ORTHOMCL564
ORTHOMCL561	ORTHOMCL585	ORTHOMCL563	ORTHOMCL595	ORTHOMCL568	ORTHOMCL568	ORTHOMCL564	ORTHOMCL563	ORTHOMCL561	ORTHOMCL564	ORTHOMCL565
ORTHOMCL562	ORTHOMCL586	ORTHOMCL564	ORTHOMCL596	ORTHOMCL569	ORTHOMCL569	ORTHOMCL565	ORTHOMCL564	ORTHOMCL562	ORTHOMCL565	ORTHOMCL566
ORTHOMCL563	ORTHOMCL587	ORTHOMCL565	ORTHOMCL597	ORTHOMCL570	ORTHOMCL570	ORTHOMCL566	ORTHOMCL565	ORTHOMCL563	ORTHOMCL566	ORTHOMCL567
ORTHOMCL564	ORTHOMCL588	ORTHOMCL566	ORTHOMCL598	ORTHOMCL571	ORTHOMCL571	ORTHOMCL567	ORTHOMCL566	ORTHOMCL564	ORTHOMCL567	ORTHOMCL568
ORTHOMCL565	ORTHOMCL589	ORTHOMCL567	ORTHOMCL599	ORTHOMCL572	ORTHOMCL572	ORTHOMCL568	ORTHOMCL567	ORTHOMCL565	ORTHOMCL568	ORTHOMCL569
ORTHOMCL566	ORTHOMCL590	ORTHOMCL568	ORTHOMCL600	ORTHOMCL573	ORTHOMCL573	ORTHOMCL569	ORTHOMCL568	ORTHOMCL566	ORTHOMCL569	ORTHOMCL570
ORTHOMCL567	ORTHOMCL591	ORTHOMCL569	ORTHOMCL601	ORTHOMCL574	ORTHOMCL574	ORTHOMCL570	ORTHOMCL569	ORTHOMCL567	ORTHOMCL570	ORTHOMCL571
ORTHOMCL568	ORTHOMCL592	ORTHOMCL570	ORTHOMCL602	ORTHOMCL575	ORTHOMCL575	ORTHOMCL571	ORTHOMCL570	ORTHOMCL568	ORTHOMCL571	ORTHOMCL572
ORTHOMCL569	ORTHOMCL593	ORTHOMCL571	ORTHOMCL604	ORTHOMCL576	ORTHOMCL576	ORTHOMCL572	ORTHOMCL571	ORTHOMCL569	ORTHOMCL572	ORTHOMCL573
ORTHOMCL570	ORTHOMCL594	ORTHOMCL572	ORTHOMCL605	ORTHOMCL577	ORTHOMCL577	ORTHOMCL573	ORTHOMCL572	ORTHOMCL570	ORTHOMCL573	ORTHOMCL574
ORTHOMCL571	ORTHOMCL595	ORTHOMCL573	ORTHOMCL606	ORTHOMCL578	ORTHOMCL578	ORTHOMCL574	ORTHOMCL573	ORTHOMCL571	ORTHOMCL574	ORTHOMCL575
ORTHOMCL572	ORTHOMCL596	ORTHOMCL574	ORTHOMCL607	ORTHOMCL579	ORTHOMCL579	ORTHOMCL575	ORTHOMCL574	ORTHOMCL573	ORTHOMCL575	ORTHOMCL576
ORTHOMCL573	ORTHOMCL597	ORTHOMCL575	ORTHOMCL608	ORTHOMCL580	ORTHOMCL580	ORTHOMCL576	ORTHOMCL575	ORTHOMCL574	ORTHOMCL577	ORTHOMCL578
ORTHOMCL574	ORTHOMCL598	ORTHOMCL577	ORTHOMCL609	ORTHOMCL581	ORTHOMCL581	ORTHOMCL577	ORTHOMCL576	ORTHOMCL575	ORTHOMCL578	ORTHOMCL579
ORTHOMCL575	ORTHOMCL599	ORTHOMCL578	ORTHOMCL610	ORTHOMCL582	ORTHOMCL582	ORTHOMCL578	ORTHOMCL577	ORTHOMCL577	ORTHOMCL579	ORTHOMCL580
ORTHOMCL576	ORTHOMCL600	ORTHOMCL579	ORTHOMCL611	ORTHOMCL583	ORTHOMCL583	ORTHOMCL579	ORTHOMCL578	ORTHOMCL578	ORTHOMCL580	ORTHOMCL581
ORTHOMCL578	ORTHOMCL601	ORTHOMCL580	ORTHOMCL612	ORTHOMCL584	ORTHOMCL584	ORTHOMCL580	ORTHOMCL579	ORTHOMCL579	ORTHOMCL581	ORTHOMCL582
ORTHOMCL579	ORTHOMCL602	ORTHOMCL581	ORTHOMCL613	ORTHOMCL585	ORTHOMCL585	ORTHOMCL581	ORTHOMCL580	ORTHOMCL580	ORTHOMCL582	ORTHOMCL583
ORTHOMCL580	ORTHOMCL604	ORTHOMCL582	ORTHOMCL614	ORTHOMCL586	ORTHOMCL586	ORTHOMCL582	ORTHOMCL581	ORTHOMCL581	ORTHOMCL583	ORTHOMCL584
ORTHOMCL581	ORTHOMCL605	ORTHOMCL583	ORTHOMCL615	ORTHOMCL587	ORTHOMCL587	ORTHOMCL583	ORTHOMCL582	ORTHOMCL582	ORTHOMCL584	ORTHOMCL585
ORTHOMCL582	ORTHOMCL606	ORTHOMCL584	ORTHOMCL616	ORTHOMCL588	ORTHOMCL588	ORTHOMCL584	ORTHOMCL583	ORTHOMCL583	ORTHOMCL585	ORTHOMCL586
ORTHOMCL583	ORTHOMCL607	ORTHOMCL585	ORTHOMCL617	ORTHOMCL589	ORTHOMCL589	ORTHOMCL585	ORTHOMCL584	ORTHOMCL584	ORTHOMCL586	ORTHOMCL587
ORTHOMCL584	ORTHOMCL608	ORTHOMCL586	ORTHOMCL618	ORTHOMCL590	ORTHOMCL590	ORTHOMCL586	ORTHOMCL586	ORTHOMCL585	ORTHOMCL587	ORTHOMCL588
ORTHOMCL585	ORTHOMCL609	ORTHOMCL587	ORTHOMCL619	ORTHOMCL591	ORTHOMCL591	ORTHOMCL587	ORTHOMCL587	ORTHOMCL586	ORTHOMCL588	ORTHOMCL589
ORTHOMCL586	ORTHOMCL610	ORTHOMCL588	ORTHOMCL620	ORTHOMCL592	ORTHOMCL592	ORTHOMCL588	ORTHOMCL588	ORTHOMCL587	ORTHOMCL589	ORTHOMCL590
ORTHOMCL587	ORTHOMCL611	ORTHOMCL589	ORTHOMCL621	ORTHOMCL593	ORTHOMCL593	ORTHOMCL589	ORTHOMCL589	ORTHOMCL588	ORTHOMCL590	ORTHOMCL591
ORTHOMCL588	ORTHOMCL612	ORTHOMCL590	ORTHOMCL623	ORTHOMCL594	ORTHOMCL594	ORTHOMCL590	ORTHOMCL590	ORTHOMCL589	ORTHOMCL591	ORTHOMCL592
ORTHOMCL589	ORTHOMCL613	ORTHOMCL591	ORTHOMCL624	ORTHOMCL595	ORTHOMCL595	ORTHOMCL591	ORTHOMCL591	ORTHOMCL590	ORTHOMCL592	ORTHOMCL593
ORTHOMCL590	ORTHOMCL614	ORTHOMCL592	ORTHOMCL625	ORTHOMCL596	ORTHOMCL596	ORTHOMCL592	ORTHOMCL592	ORTHOMCL591	ORTHOMCL593	ORTHOMCL594
ORTHOMCL591	ORTHOMCL615	ORTHOMCL593	ORTHOMCL626	ORTHOMCL597	ORTHOMCL597	ORTHOMCL593	ORTHOMCL593	ORTHOMCL592	ORTHOMCL594	ORTHOMCL595
ORTHOMCL592	ORTHOMCL616	ORTHOMCL594	ORTHOMCL627	ORTHOMCL598	ORTHOMCL598	ORTHOMCL594	ORTHOMCL594	ORTHOMCL593	ORTHOMCL595	ORTHOMCL596
ORTHOMCL593	ORTHOMCL617	ORTHOMCL595	ORTHOMCL628	ORTHOMCL599	ORTHOMCL599	ORTHOMCL595	ORTHOMCL595	ORTHOMCL594	ORTHOMCL596	ORTHOMCL597
ORTHOMCL594	ORTHOMCL618	ORTHOMCL596	ORTHOMCL629	ORTHOMCL600	ORTHOMCL600	ORTHOMCL596	ORTHOMCL596	ORTHOMCL595	ORTHOMCL597	ORTHOMCL598
ORTHOMCL595	ORTHOMCL619	ORTHOMCL597	ORTHOMCL630	ORTHOMCL601	ORTHOMCL601	ORTHOMCL597	ORTHOMCL597	ORTHOMCL596	ORTHOMCL598	ORTHOMCL599
ORTHOMCL596	ORTHOMCL620	ORTHOMCL598	ORTHOMCL631	ORTHOMCL602	ORTHOMCL603	ORTHOMCL598	ORTHOMCL598	ORTHOMCL597	ORTHOMCL599	ORTHOMCL600
ORTHOMCL597	ORTHOMCL621	ORTHOMCL599	ORTHOMCL632	ORTHOMCL603	ORTHOMCL604	ORTHOMCL599	ORTHOMCL599	ORTHOMCL598	ORTHOMCL600	ORTHOMCL601
ORTHOMCL598	ORTHOMCL623	ORTHOMCL600	ORTHOMCL633	ORTHOMCL604	ORTHOMCL605	ORTHOMCL600	ORTHOMCL600	ORTHOMCL599	ORTHOMCL601	ORTHOMCL602
ORTHOMCL599	ORTHOMCL624	ORTHOMCL601	ORTHOMCL634	ORTHOMCL605	ORTHOMCL606	ORTHOMCL601	ORTHOMCL601	ORTHOMCL600	ORTHOMCL602	ORTHOMCL603
ORTHOMCL600	ORTHOMCL625	ORTHOMCL602	ORTHOMCL635	ORTHOMCL606	ORTHOMCL607	ORTHOMCL602	ORTHOMCL602	ORTHOMCL601	ORTHOMCL603	ORTHOMCL604
ORTHOMCL601	ORTHOMCL626	ORTHOMCL603	ORTHOMCL636	ORTHOMCL607	ORTHOMCL608	ORTHOMCL603	ORTHOMCL603	ORTHOMCL602	ORTHOMCL604	ORTHOMCL605
ORTHOMCL602	ORTHOMCL627	ORTHOMCL604	ORTHOMCL637	ORTHOMCL608	ORTHOMCL609	ORTHOMCL604	ORTHOMCL604	ORTHOMCL603	ORTHOMCL605	ORTHOMCL606
ORTHOMCL603	ORTHOMCL628	ORTHOMCL605	ORTHOMCL638	ORTHOMCL609	ORTHOMCL610	ORTHOMCL605	ORTHOMCL605	ORTHOMCL604	ORTHOMCL606	ORTHOMCL607
ORTHOMCL604	ORTHOMCL629	ORTHOMCL606	ORTHOMCL639	ORTHOMCL610	ORTHOMCL611	ORTHOMCL606	ORTHOMCL606	ORTHOMCL605	ORTHOMCL607	ORTHOMCL608
ORTHOMCL605	ORTHOMCL630	ORTHOMCL607	ORTHOMCL640	ORTHOMCL611	ORTHOMCL612	ORTHOMCL607	ORTHOMCL607	ORTHOMCL606	ORTHOMCL608	ORTHOMCL609
ORTHOMCL606	ORTHOMCL631	ORTHOMCL608	ORTHOMCL641	ORTHOMCL612	ORTHOMCL613	ORTHOMCL608	ORTHOMCL608	ORTHOMCL607	ORTHOMCL609	ORTHOMCL610
ORTHOMCL607	ORTHOMCL632	ORTHOMCL609	ORTHOMCL642	ORTHOMCL613	ORTHOMCL614	ORTHOMCL609	ORTHOMCL609	ORTHOMCL608	ORTHOMCL610	ORTHOMCL611
ORTHOMCL608	ORTHOMCL633	ORTHOMCL610	ORTHOMCL643	ORTHOMCL614	ORTHOMCL615	ORTHOMCL610	ORTHOMCL610	ORTHOMCL609	ORTHOMCL611	ORTHOMCL612
ORTHOMCL609	ORTHOMCL634	ORTHOMCL611	ORTHOMCL644	ORTHOMCL615	ORTHOMCL616	ORTHOMCL611	ORTHOMCL611	ORTHOMCL610	ORTHOMCL612	ORTHOMCL613
ORTHOMCL610	ORTHOMCL635	ORTHOMCL612	ORTHOMCL645	ORTHOMCL617	ORTHOMCL617	ORTHOMCL612	ORTHOMCL612	ORTHOMCL611	ORTHOMCL613	ORTHOMCL614
ORTHOMCL611	ORTHOMCL636	ORTHOMCL614	ORTHOMCL646	ORTHOMCL618	ORTHOMCL618	ORTHOMCL613	ORTHOMCL613	ORTHOMCL612	ORTHOMCL614	ORTHOMCL615
ORTHOMCL612	ORTHOMCL637	ORTHOMCL615	ORTHOMCL647	ORTHOMCL619	ORTHOMCL619	ORTHOMCL614	ORTHOMCL614	ORTHOMCL613	ORTHOMCL615	ORTHOMCL616
ORTHOMCL613	ORTHOMCL638	ORTHOMCL616	ORTHOMCL649	ORTHOMCL620	ORTHOMCL620	ORTHOMCL615	ORTHOMCL615	ORTHOMCL614	ORTHOMCL616	ORTHOMCL617
ORTHOMCL614	ORTHOMCL639	ORTHOMCL617	ORTHOMCL650	ORTHOMCL621	ORTHOMCL621	ORTHOMCL616	ORTHOMCL616	ORTHOMCL615	ORTHOMCL617	ORTHOMCL618
ORTHOMCL615	ORTHOMCL640	ORTHOMCL618	ORTHOMCL651	ORTHOMCL622	ORTHOMCL622	ORTHOMCL617	ORTHOMCL617	ORTHOMCL616	ORTHOMCL619	ORTHOMCL619
ORTHOMCL616	ORTHOMCL641	ORTHOMCL619	ORTHOMCL652	ORTHOMCL623	ORTHOMCL623	ORTHOMCL618	ORTHOMCL618	ORTHOMCL617	ORTHOMCL620	ORTHOMCL620
ORTHOMCL617	ORTHOMCL642	ORTHOMCL620	ORTHOMCL653	ORTHOMCL624	ORTHOMCL624	ORTHOMCL619	ORTHOMCL619	ORTHOMCL618	ORTHOMCL621	ORTHOMCL621
ORTHOMCL618	ORTHOMCL643	ORTHOMCL621	ORTHOMCL654	ORTHOMCL625	ORTHOMCL625	ORTHOMCL620	ORTHOMCL620	ORTHOMCL619	ORTHOMCL622	ORTHOMCL622
ORTHOMCL619	ORTHOMCL644	ORTHOMCL622	ORTHOMCL655	ORTHOMCL626	ORTHOMCL626	ORTHOMCL621	ORTHOMCL621	ORTHOMCL620	ORTHOMCL623	ORTHOMCL623
ORTHOMCL620	ORTHOMCL645	ORTHOMCL623	ORTHOMCL656	ORTHOMCL627	ORTHOMCL627	ORTHOMCL622	ORTHOMCL622	ORTHOMCL621	ORTHOMCL624	ORTHOMCL624
ORTHOMCL621	ORTHOMCL646	ORTHOMCL624	ORTHOMCL657	ORTHOMCL628	ORTHOMCL628	ORTHOMCL624	ORTHOMCL623	ORTHOMCL622	ORTHOMCL625	ORTHOMCL625
ORTHOMCL623	ORTHOMCL647	ORTHOMCL625	ORTHOMCL658	ORTHOMCL629	ORTHOMCL629	ORTHOMCL625	ORTHOMCL624	ORTHOMCL623	ORTHOMCL626	ORTHOMCL626
ORTHOMCL624	ORTHOMCL648	ORTHOMCL626	ORTHOMCL659	ORTHOMCL630	ORTHOMCL630	ORTHOMCL626	ORTHOMCL625	ORTHOMCL624	ORTHOMCL627	ORTHOMCL627
ORTHOMCL625	ORTHOMCL649	ORTHOMCL627	ORTHOMCL660	ORTHOMCL631	ORTHOMCL631	ORTHOMCL627	ORTHOMCL626	ORTHOMCL625	ORTHOMCL628	ORTHOMCL628
ORTHOMCL626	ORTHOMCL650	ORTHOMCL628	ORTHOMCL661	ORTHOMCL632	ORTHOMCL632	ORTHOMCL628	ORTHOMCL627	ORTHOMCL626	ORTHOMCL629	ORTHOMCL629
ORTHOMCL627	ORTHOMCL651	ORTHOMCL629	ORTHOMCL662	ORTHOMCL633	ORTHOMCL633	ORTHOMCL629	ORTHOMCL628	ORTHOMCL627	ORTHOMCL630	ORTHOMCL630
ORTHOMCL628	ORTHOMCL652	ORTHOMCL630	ORTHOMCL663	ORTHOMCL634	ORTHOMCL634	ORTHOMCL630	ORTHOMCL629	ORTHOMCL628	ORTHOMCL631	ORTHOMCL631
ORTHOMCL629	ORTHOMCL653	ORTHOMCL631	ORTHOMCL664	ORTHOMCL635	ORTHOMCL635	ORTHOMCL631	ORTHOMCL630	ORTHOMCL629	ORTHOMCL632	ORTHOMCL632
ORTHOMCL630	ORTHOMCL654	ORTHOMCL632	ORTHOMCL665	ORTHOMCL636	ORTHOMCL636	ORTHOMCL632	ORTHOMCL631	ORTHOMCL630	ORTHOMCL633	ORTHOMCL633
ORTHOMCL631	ORTHOMCL655	ORTHOMCL633	ORTHOMCL666	ORTHOMCL637	ORTHOMCL637	ORTHOMCL633	ORTHOMCL632	ORTHOMCL631	ORTHOMCL634	ORTHOMCL634
ORTHOMCL632	ORTHOMCL656	ORTHOMCL634	ORTHOMCL667	ORTHOMCL638	ORTHOMCL638	ORTHOMCL634	ORTHOMCL633	ORTHOMCL632	ORTHOMCL635	ORTHOMCL635
ORTHOMCL633	ORTHOMCL657	ORTHOMCL635	ORTHOMCL668	ORTHOMCL639	ORTHOMCL639	ORTHOMCL635	ORTHOMCL634	ORTHOMCL633	ORTHOMCL636	ORTHOMCL636
ORTHOMCL634	ORTHOMCL658	ORTHOMCL636	ORTHOMCL669	ORTHOMCL640	ORTHOMCL640	ORTHOMCL636	ORTHOMCL635	ORTHOMCL634	ORTHOMCL637	ORTHOMCL637
ORTHOMCL635	ORTHOMCL659	ORTHOMCL637	ORTHOMCL670	ORTHOMCL641	ORTHOMCL641	ORTHOMCL637	ORTHOMCL636	ORTHOMCL635	ORTHOMCL638	ORTHOMCL638
ORTHOMCL636	ORTHOMCL660	ORTHOMCL638	ORTHOMCL671	ORTHOMCL642	ORTHOMCL642	ORTHOMCL638	ORTHOMCL637	ORTHOMCL636	ORTHOMCL639	ORTHOMCL639
ORTHOMCL637	ORTHOMCL661	ORTHOMCL639	ORTHOMCL672	ORTHOMCL643	ORTHOMCL643	ORTHOMCL639	ORTHOMCL638	ORTHOMCL637	ORTHOMCL640	ORTHOMCL640
ORTHOMCL638	ORTHOMCL662	ORTHOMCL640	ORTHOMCL673	ORTHOMCL644	ORTHOMCL644	ORTHOMCL640	ORTHOMCL639	ORTHOMCL638	ORTHOMCL641	ORTHOMCL641
ORTHOMCL639	ORTHOMCL663	ORTHOMCL641	ORTHOMCL674	ORTHOMCL645	ORTHOMCL645	ORTHOMCL641	ORTHOMCL640	ORTHOMCL639	ORTHOMCL642	ORTHOMCL642
ORTHOMCL640	ORTHOMCL664	ORTHOMCL642	ORTHOMCL675	ORTHOMCL646	ORTHOMCL646	ORTHOMCL642	ORTHOMCL641	ORTHOMCL640	ORTHOMCL643	ORTHOMCL643
ORTHOMCL641	ORTHOMCL665	ORTHOMCL643	ORTHOMCL676	ORTHOMCL647	ORTHOMCL647	ORTHOMCL643	ORTHOMCL642	ORTHOMCL641	ORTHOMCL645	ORTHOMCL644
ORTHOMCL642	ORTHOMCL666	ORTHOMCL644	ORTHOMCL677	ORTHOMCL648	ORTHOMCL648	ORTHOMCL644	ORTHOMCL643	ORTHOMCL642	ORTHOMCL646	ORTHOMCL645
ORTHOMCL643	ORTHOMCL667	ORTHOMCL645	ORTHOMCL678	ORTHOMCL649	ORTHOMCL649	ORTHOMCL645	ORTHOMCL644	ORTHOMCL643	ORTHOMCL647	ORTHOMCL646
ORTHOMCL644	ORTHOMCL668	ORTHOMCL646	ORTHOMCL679	ORTHOMCL650	ORTHOMCL650	ORTHOMCL646	ORTHOMCL645	ORTHOMCL644	ORTHOMCL648	ORTHOMCL647
ORTHOMCL645	ORTHOMCL669	ORTHOMCL647	ORTHOMCL680	ORTHOMCL651	ORTHOMCL651	ORTHOMCL647	ORTHOMCL646	ORTHOMCL645	ORTHOMCL649	ORTHOMCL648
ORTHOMCL646	ORTHOMCL670	ORTHOMCL648	ORTHOMCL681	ORTHOMCL652	ORTHOMCL652	ORTHOMCL648	ORTHOMCL647	ORTHOMCL646	ORTHOMCL650	ORTHOMCL649
ORTHOMCL647	ORTHOMCL671	ORTHOMCL649	ORTHOMCL682	ORTHOMCL653	ORTHOMCL653	ORTHOMCL649	ORTHOMCL648	ORTHOMCL647	ORTHOMCL651	ORTHOMCL650
ORTHOMCL648	ORTHOMCL672	ORTHOMCL650	ORTHOMCL683	ORTHOMCL654	ORTHOMCL654	ORTHOMCL650	ORTHOMCL649	ORTHOMCL648	ORTHOMCL652	ORTHOMCL651
ORTHOMCL649	ORTHOMCL673	ORTHOMCL651	ORTHOMCL684	ORTHOMCL655	ORTHOMCL655	ORTHOMCL651	ORTHOMCL650	ORTHOMCL649	ORTHOMCL653	ORTHOMCL652
ORTHOMCL650	ORTHOMCL674	ORTHOMCL652	ORTHOMCL685	ORTHOMCL656	ORTHOMCL656	ORTHOMCL652	ORTHOMCL651	ORTHOMCL650	ORTHOMCL654	ORTHOMCL653
ORTHOMCL651	ORTHOMCL676	ORTHOMCL653	ORTHOMCL686	ORTHOMCL657	ORTHOMCL657	ORTHOMCL653	ORTHOMCL652	ORTHOMCL651	ORTHOMCL655	ORTHOMCL654
ORTHOMCL652	ORTHOMCL677	ORTHOMCL654	ORTHOMCL687	ORTHOMCL658	ORTHOMCL658	ORTHOMCL654	ORTHOMCL653	ORTHOMCL652	ORTHOMCL656	ORTHOMCL655
ORTHOMCL653	ORTHOMCL678	ORTHOMCL655	ORTHOMCL688	ORTHOMCL659	ORTHOMCL659	ORTHOMCL655	ORTHOMCL654	ORTHOMCL653	ORTHOMCL657	ORTHOMCL656
ORTHOMCL654	ORTHOMCL679	ORTHOMCL656	ORTHOMCL689	ORTHOMCL660	ORTHOMCL660	ORTHOMCL656	ORTHOMCL655	ORTHOMCL654	ORTHOMCL658	ORTHOMCL657
ORTHOMCL655	ORTHOMCL680	ORTHOMCL657	ORTHOMCL690	ORTHOMCL661	ORTHOMCL661	ORTHOMCL657	ORTHOMCL656	ORTHOMCL655	ORTHOMCL659	ORTHOMCL658
ORTHOMCL656	ORTHOMCL681	ORTHOMCL658	ORTHOMCL691	ORTHOMCL662	ORTHOMCL662	ORTHOMCL658	ORTHOMCL657	ORTHOMCL656	ORTHOMCL660	ORTHOMCL659
ORTHOMCL657	ORTHOMCL682	ORTHOMCL659	ORTHOMCL692	ORTHOMCL663	ORTHOMCL663	ORTHOMCL659	ORTHOMCL658	ORTHOMCL657	ORTHOMCL661	ORTHOMCL660
ORTHOMCL658	ORTHOMCL683	ORTHOMCL660	ORTHOMCL693	ORTHOMCL664	ORTHOMCL664	ORTHOMCL660	ORTHOMCL659	ORTHOMCL658	ORTHOMCL662	ORTHOMCL661
ORTHOMCL659	ORTHOMCL684	ORTHOMCL661	ORTHOMCL694	ORTHOMCL665	ORTHOMCL665	ORTHOMCL661	ORTHOMCL660	ORTHOMCL659	ORTHOMCL663	ORTHOMCL662
ORTHOMCL660	ORTHOMCL685	ORTHOMCL662	ORTHOMCL695	ORTHOMCL666	ORTHOMCL666	ORTHOMCL662	ORTHOMCL661	ORTHOMCL660	ORTHOMCL664	ORTHOMCL663
ORTHOMCL661	ORTHOMCL686	ORTHOMCL663	ORTHOMCL696	ORTHOMCL667	ORTHOMCL667	ORTHOMCL663	ORTHOMCL662	ORTHOMCL661	ORTHOMCL665	ORTHOMCL664
ORTHOMCL662	ORTHOMCL687	ORTHOMCL664	ORTHOMCL697	ORTHOMCL668	ORTHOMCL668	ORTHOMCL664	ORTHOMCL663	ORTHOMCL662	ORTHOMCL666	ORTHOMCL665
ORTHOMCL663	ORTHOMCL688	ORTHOMCL665	ORTHOMCL698	ORTHOMCL669	ORTHOMCL669	ORTHOMCL665	ORTHOMCL664	ORTHOMCL663	ORTHOMCL667	ORTHOMCL666
ORTHOMCL664	ORTHOMCL689	ORTHOMCL666	ORTHOMCL699	ORTHOMCL670	ORTHOMCL670	ORTHOMCL666	ORTHOMCL665	ORTHOMCL664	ORTHOMCL668	ORTHOMCL667
ORTHOMCL665	ORTHOMCL690	ORTHOMCL667	ORTHOMCL700	ORTHOMCL671	ORTHOMCL671	ORTHOMCL667	ORTHOMCL666	ORTHOMCL665	ORTHOMCL669	ORTHOMCL668
ORTHOMCL666	ORTHOMCL691	ORTHOMCL668	ORTHOMCL701	ORTHOMCL672	ORTHOMCL672	ORTHOMCL668	ORTHOMCL667	ORTHOMCL666	ORTHOMCL670	ORTHOMCL669
ORTHOMCL667	ORTHOMCL692	ORTHOMCL669	ORTHOMCL702	ORTHOMCL673	ORTHOMCL673	ORTHOMCL669	ORTHOMCL668	ORTHOMCL667	ORTHOMCL671	ORTHOMCL670
ORTHOMCL668	ORTHOMCL693	ORTHOMCL670	ORTHOMCL703	ORTHOMCL674	ORTHOMCL674	ORTHOMCL670	ORTHOMCL669	ORTHOMCL668	ORTHOMCL672	ORTHOMCL671
ORTHOMCL669	ORTHOMCL694	ORTHOMCL671	ORTHOMCL704	ORTHOMCL675	ORTHOMCL675	ORTHOMCL671	ORTHOMCL670	ORTHOMCL669	ORTHOMCL673	ORTHOMCL672
ORTHOMCL670	ORTHOMCL695	ORTHOMCL672	ORTHOMCL705	ORTHOMCL676	ORTHOMCL676	ORTHOMCL672	ORTHOMCL671	ORTHOMCL670	ORTHOMCL674	ORTHOMCL673
ORTHOMCL671	ORTHOMCL696	ORTHOMCL673	ORTHOMCL706	ORTHOMCL677	ORTHOMCL677	ORTHOMCL673	ORTHOMCL672	ORTHOMCL671	ORTHOMCL675	ORTHOMCL674
ORTHOMCL672	ORTHOMCL697	ORTHOMCL674	ORTHOMCL707	ORTHOMCL678	ORTHOMCL678	ORTHOMCL674	ORTHOMCL673	ORTHOMCL672	ORTHOMCL676	ORTHOMCL675
ORTHOMCL673	ORTHOMCL698	ORTHOMCL675	ORTHOMCL709	ORTHOMCL679	ORTHOMCL679	ORTHOMCL675	ORTHOMCL674	ORTHOMCL673	ORTHOMCL677	ORTHOMCL676
ORTHOMCL674	ORTHOMCL699	ORTHOMCL676	ORTHOMCL710	ORTHOMCL680	ORTHOMCL680	ORTHOMCL676	ORTHOMCL675	ORTHOMCL674	ORTHOMCL678	ORTHOMCL677
ORTHOMCL675	ORTHOMCL700	ORTHOMCL677	ORTHOMCL711	ORTHOMCL681	ORTHOMCL681	ORTHOMCL677	ORTHOMCL676	ORTHOMCL675	ORTHOMCL679	ORTHOMCL678
ORTHOMCL676	ORTHOMCL701	ORTHOMCL678	ORTHOMCL712	ORTHOMCL682	ORTHOMCL682	ORTHOMCL678	ORTHOMCL677	ORTHOMCL676	ORTHOMCL680	ORTHOMCL679
ORTHOMCL677	ORTHOMCL702	ORTHOMCL679	ORTHOMCL713	ORTHOMCL683	ORTHOMCL683	ORTHOMCL679	ORTHOMCL678	ORTHOMCL677	ORTHOMCL681	ORTHOMCL680
ORTHOMCL678	ORTHOMCL703	ORTHOMCL680	ORTHOMCL714	ORTHOMCL684	ORTHOMCL684	ORTHOMCL680	ORTHOMCL679	ORTHOMCL678	ORTHOMCL682	ORTHOMCL681
ORTHOMCL679	ORTHOMCL704	ORTHOMCL681	ORTHOMCL715	ORTHOMCL685	ORTHOMCL685	ORTHOMCL681	ORTHOMCL680	ORTHOMCL679	ORTHOMCL683	ORTHOMCL682
ORTHOMCL680	ORTHOMCL705	ORTHOMCL682	ORTHOMCL716	ORTHOMCL686	ORTHOMCL686	ORTHOMCL682	ORTHOMCL681	ORTHOMCL680	ORTHOMCL684	ORTHOMCL683
ORTHOMCL681	ORTHOMCL706	ORTHOMCL683	ORTHOMCL717	ORTHOMCL687	ORTHOMCL687	ORTHOMCL683	ORTHOMCL682	ORTHOMCL681	ORTHOMCL685	ORTHOMCL684
ORTHOMCL682	ORTHOMCL707	ORTHOMCL684	ORTHOMCL718	ORTHOMCL688	ORTHOMCL688	ORTHOMCL684	ORTHOMCL683	ORTHOMCL682	ORTHOMCL686	ORTHOMCL685
ORTHOMCL683	ORTHOMCL708	ORTHOMCL685	ORTHOMCL719	ORTHOMCL689	ORTHOMCL689	ORTHOMCL685	ORTHOMCL684	ORTHOMCL683	ORTHOMCL687	ORTHOMCL686
ORTHOMCL684	ORTHOMCL709	ORTHOMCL686	ORTHOMCL720	ORTHOMCL690	ORTHOMCL690	ORTHOMCL686	ORTHOMCL685	ORTHOMCL684	ORTHOMCL688	ORTHOMCL687
ORTHOMCL685	ORTHOMCL710	ORTHOMCL687	ORTHOMCL721	ORTHOMCL691	ORTHOMCL691	ORTHOMCL687	ORTHOMCL686	ORTHOMCL685	ORTHOMCL689	ORTHOMCL688
ORTHOMCL686	ORTHOMCL711	ORTHOMCL688	ORTHOMCL722	ORTHOMCL692	ORTHOMCL692	ORTHOMCL688	ORTHOMCL687	ORTHOMCL686	ORTHOMCL690	ORTHOMCL689
ORTHOMCL687	ORTHOMCL712	ORTHOMCL689	ORTHOMCL723	ORTHOMCL693	ORTHOMCL693	ORTHOMCL689	ORTHOMCL688	ORTHOMCL687	ORTHOMCL691	ORTHOMCL690
ORTHOMCL688	ORTHOMCL713	ORTHOMCL690	ORTHOMCL724	ORTHOMCL694	ORTHOMCL694	ORTHOMCL690	ORTHOMCL689	ORTHOMCL688	ORTHOMCL692	ORTHOMCL691
ORTHOMCL689	ORTHOMCL714	ORTHOMCL691	ORTHOMCL725	ORTHOMCL695	ORTHOMCL695	ORTHOMCL691	ORTHOMCL690	ORTHOMCL689	ORTHOMCL693	ORTHOMCL692
ORTHOMCL690	ORTHOMCL715	ORTHOMCL692	ORTHOMCL726	ORTHOMCL696	ORTHOMCL696	ORTHOMCL692	ORTHOMCL691	ORTHOMCL690	ORTHOMCL694	ORTHOMCL693
ORTHOMCL691	ORTHOMCL716	ORTHOMCL693	ORTHOMCL727	ORTHOMCL697	ORTHOMCL697	ORTHOMCL693	ORTHOMCL692	ORTHOMCL691	ORTHOMCL695	ORTHOMCL694
ORTHOMCL692	ORTHOMCL717	ORTHOMCL694	ORTHOMCL728	ORTHOMCL698	ORTHOMCL698	ORTHOMCL694	ORTHOMCL693	ORTHOMCL692	ORTHOMCL696	ORTHOMCL695
ORTHOMCL693	ORTHOMCL718	ORTHOMCL695	ORTHOMCL729	ORTHOMCL699	ORTHOMCL699	ORTHOMCL695	ORTHOMCL694	ORTHOMCL693	ORTHOMCL697	ORTHOMCL696
ORTHOMCL694	ORTHOMCL719	ORTHOMCL696	ORTHOMCL730	ORTHOMCL700	ORTHOMCL700	ORTHOMCL696	ORTHOMCL695	ORTHOMCL694	ORTHOMCL698	ORTHOMCL697
ORTHOMCL695	ORTHOMCL720	ORTHOMCL697	ORTHOMCL731	ORTHOMCL701	ORTHOMCL701	ORTHOMCL697	ORTHOMCL696	ORTHOMCL695	ORTHOMCL699	ORTHOMCL698
ORTHOMCL696	ORTHOMCL721	ORTHOMCL698	ORTHOMCL732	ORTHOMCL702	ORTHOMCL702	ORTHOMCL699	ORTHOMCL697	ORTHOMCL696	ORTHOMCL700	ORTHOMCL699
ORTHOMCL697	ORTHOMCL722	ORTHOMCL699	ORTHOMCL733	ORTHOMCL703	ORTHOMCL703	ORTHOMCL700	ORTHOMCL698	ORTHOMCL697	ORTHOMCL701	ORTHOMCL700
ORTHOMCL698	ORTHOMCL723	ORTHOMCL700	ORTHOMCL734	ORTHOMCL704	ORTHOMCL704	ORTHOMCL701	ORTHOMCL699	ORTHOMCL698	ORTHOMCL702	ORTHOMCL701
ORTHOMCL699	ORTHOMCL724	ORTHOMCL701	ORTHOMCL735	ORTHOMCL705	ORTHOMCL705	ORTHOMCL702	ORTHOMCL700	ORTHOMCL699	ORTHOMCL703	ORTHOMCL702
ORTHOMCL700	ORTHOMCL725	ORTHOMCL702	ORTHOMCL736	ORTHOMCL706	ORTHOMCL706	ORTHOMCL703	ORTHOMCL701	ORTHOMCL700	ORTHOMCL704	ORTHOMCL703
ORTHOMCL701	ORTHOMCL726	ORTHOMCL703	ORTHOMCL737	ORTHOMCL707	ORTHOMCL707	ORTHOMCL704	ORTHOMCL702	ORTHOMCL701	ORTHOMCL705	ORTHOMCL704
ORTHOMCL702	ORTHOMCL727	ORTHOMCL704	ORTHOMCL738	ORTHOMCL708	ORTHOMCL708	ORTHOMCL705	ORTHOMCL703	ORTHOMCL702	ORTHOMCL706	ORTHOMCL705
ORTHOMCL703	ORTHOMCL728	ORTHOMCL705	ORTHOMCL739	ORTHOMCL709	ORTHOMCL709	ORTHOMCL706	ORTHOMCL704	ORTHOMCL703	ORTHOMCL707	ORTHOMCL706
ORTHOMCL704	ORTHOMCL729	ORTHOMCL706	ORTHOMCL740	ORTHOMCL710	ORTHOMCL710	ORTHOMCL707	ORTHOMCL705	ORTHOMCL704	ORTHOMCL708	ORTHOMCL707
ORTHOMCL705	ORTHOMCL730	ORTHOMCL707	ORTHOMCL741	ORTHOMCL711	ORTHOMCL711	ORTHOMCL708	ORTHOMCL706	ORTHOMCL705	ORTHOMCL709	ORTHOMCL708
ORTHOMCL706	ORTHOMCL731	ORTHOMCL708	ORTHOMCL742	ORTHOMCL712	ORTHOMCL712	ORTHOMCL709	ORTHOMCL707	ORTHOMCL706	ORTHOMCL710	ORTHOMCL709
ORTHOMCL707	ORTHOMCL732	ORTHOMCL709	ORTHOMCL743	ORTHOMCL713	ORTHOMCL713	ORTHOMCL710	ORTHOMCL708	ORTHOMCL707	ORTHOMCL711	ORTHOMCL710
ORTHOMCL708	ORTHOMCL733	ORTHOMCL710	ORTHOMCL744	ORTHOMCL714	ORTHOMCL714	ORTHOMCL711	ORTHOMCL709	ORTHOMCL708	ORTHOMCL712	ORTHOMCL711
ORTHOMCL709	ORTHOMCL734	ORTHOMCL711	ORTHOMCL745	ORTHOMCL715	ORTHOMCL715	ORTHOMCL712	ORTHOMCL710	ORTHOMCL709	ORTHOMCL713	ORTHOMCL712
ORTHOMCL710	ORTHOMCL735	ORTHOMCL712	ORTHOMCL746	ORTHOMCL716	ORTHOMCL716	ORTHOMCL713	ORTHOMCL711	ORTHOMCL710	ORTHOMCL714	ORTHOMCL713
ORTHOMCL711	ORTHOMCL736	ORTHOMCL713	ORTHOMCL747	ORTHOMCL717	ORTHOMCL717	ORTHOMCL714	ORTHOMCL712	ORTHOMCL711	ORTHOMCL715	ORTHOMCL714
ORTHOMCL712	ORTHOMCL737	ORTHOMCL714	ORTHOMCL748	ORTHOMCL718	ORTHOMCL718	ORTHOMCL715	ORTHOMCL713	ORTHOMCL712	ORTHOMCL716	ORTHOMCL715
ORTHOMCL713	ORTHOMCL738	ORTHOMCL715	ORTHOMCL749	ORTHOMCL719	ORTHOMCL719	ORTHOMCL716	ORTHOMCL714	ORTHOMCL713	ORTHOMCL717	ORTHOMCL716
ORTHOMCL714	ORTHOMCL739	ORTHOMCL716	ORTHOMCL750	ORTHOMCL720	ORTHOMCL720	ORTHOMCL717	ORTHOMCL715	ORTHOMCL714	ORTHOMCL718	ORTHOMCL717
ORTHOMCL715	ORTHOMCL740	ORTHOMCL717	ORTHOMCL751	ORTHOMCL721	ORTHOMCL721	ORTHOMCL718	ORTHOMCL716	ORTHOMCL715	ORTHOMCL719	ORTHOMCL718
ORTHOMCL716	ORTHOMCL741	ORTHOMCL718	ORTHOMCL752	ORTHOMCL722	ORTHOMCL722	ORTHOMCL719	ORTHOMCL717	ORTHOMCL716	ORTHOMCL720	ORTHOMCL719
ORTHOMCL717	ORTHOMCL742	ORTHOMCL719	ORTHOMCL753	ORTHOMCL723	ORTHOMCL723	ORTHOMCL720	ORTHOMCL718	ORTHOMCL717	ORTHOMCL721	ORTHOMCL720
ORTHOMCL718	ORTHOMCL743	ORTHOMCL720	ORTHOMCL754	ORTHOMCL724	ORTHOMCL724	ORTHOMCL721	ORTHOMCL719	ORTHOMCL718	ORTHOMCL722	ORTHOMCL721
ORTHOMCL719	ORTHOMCL744	ORTHOMCL721	ORTHOMCL755	ORTHOMCL725	ORTHOMCL725	ORTHOMCL722	ORTHOMCL721	ORTHOMCL719	ORTHOMCL723	ORTHOMCL722
ORTHOMCL720	ORTHOMCL745	ORTHOMCL722	ORTHOMCL756	ORTHOMCL726	ORTHOMCL726	ORTHOMCL723	ORTHOMCL722	ORTHOMCL720	ORTHOMCL724	ORTHOMCL723
ORTHOMCL721	ORTHOMCL746	ORTHOMCL723	ORTHOMCL758	ORTHOMCL727	ORTHOMCL727	ORTHOMCL724	ORTHOMCL723	ORTHOMCL721	ORTHOMCL725	ORTHOMCL724
ORTHOMCL722	ORTHOMCL747	ORTHOMCL724	ORTHOMCL759	ORTHOMCL728	ORTHOMCL728	ORTHOMCL725	ORTHOMCL724	ORTHOMCL722	ORTHOMCL726	ORTHOMCL725
ORTHOMCL723	ORTHOMCL748	ORTHOMCL725	ORTHOMCL760	ORTHOMCL729	ORTHOMCL729	ORTHOMCL726	ORTHOMCL725	ORTHOMCL723	ORTHOMCL727	ORTHOMCL726
ORTHOMCL724	ORTHOMCL749	ORTHOMCL726	ORTHOMCL761	ORTHOMCL730	ORTHOMCL730	ORTHOMCL727	ORTHOMCL726	ORTHOMCL724	ORTHOMCL728	ORTHOMCL727
ORTHOMCL725	ORTHOMCL750	ORTHOMCL727	ORTHOMCL762	ORTHOMCL731	ORTHOMCL731	ORTHOMCL728	ORTHOMCL727	ORTHOMCL725	ORTHOMCL729	ORTHOMCL728
ORTHOMCL726	ORTHOMCL751	ORTHOMCL728	ORTHOMCL763	ORTHOMCL732	ORTHOMCL732	ORTHOMCL729	ORTHOMCL728	ORTHOMCL726	ORTHOMCL730	ORTHOMCL729
ORTHOMCL727	ORTHOMCL752	ORTHOMCL729	ORTHOMCL764	ORTHOMCL733	ORTHOMCL733	ORTHOMCL730	ORTHOMCL729	ORTHOMCL727	ORTHOMCL731	ORTHOMCL730
ORTHOMCL728	ORTHOMCL753	ORTHOMCL730	ORTHOMCL765	ORTHOMCL734	ORTHOMCL734	ORTHOMCL731	ORTHOMCL730	ORTHOMCL728	ORTHOMCL732	ORTHOMCL731
ORTHOMCL729	ORTHOMCL754	ORTHOMCL731	ORTHOMCL766	ORTHOMCL735	ORTHOMCL735	ORTHOMCL732	ORTHOMCL731	ORTHOMCL729	ORTHOMCL733	ORTHOMCL732
ORTHOMCL730	ORTHOMCL755	ORTHOMCL732	ORTHOMCL767	ORTHOMCL736	ORTHOMCL736	ORTHOMCL733	ORTHOMCL732	ORTHOMCL730	ORTHOMCL734	ORTHOMCL733
ORTHOMCL731	ORTHOMCL756	ORTHOMCL733	ORTHOMCL768	ORTHOMCL737	ORTHOMCL737	ORTHOMCL734	ORTHOMCL733	ORTHOMCL731	ORTHOMCL735	ORTHOMCL734
ORTHOMCL732	ORTHOMCL757	ORTHOMCL734	ORTHOMCL769	ORTHOMCL738	ORTHOMCL738	ORTHOMCL735	ORTHOMCL734	ORTHOMCL732	ORTHOMCL736	ORTHOMCL735
ORTHOMCL733	ORTHOMCL758	ORTHOMCL735	ORTHOMCL770	ORTHOMCL739	ORTHOMCL739	ORTHOMCL736	ORTHOMCL735	ORTHOMCL733	ORTHOMCL737	ORTHOMCL736
ORTHOMCL734	ORTHOMCL759	ORTHOMCL736	ORTHOMCL771	ORTHOMCL740	ORTHOMCL740	ORTHOMCL737	ORTHOMCL736	ORTHOMCL734	ORTHOMCL738	ORTHOMCL737
ORTHOMCL735	ORTHOMCL760	ORTHOMCL737	ORTHOMCL772	ORTHOMCL741	ORTHOMCL741	ORTHOMCL738	ORTHOMCL737	ORTHOMCL735	ORTHOMCL739	ORTHOMCL738
ORTHOMCL736	ORTHOMCL761	ORTHOMCL738	ORTHOMCL773	ORTHOMCL742	ORTHOMCL742	ORTHOMCL739	ORTHOMCL738	ORTHOMCL736	ORTHOMCL740	ORTHOMCL739
ORTHOMCL737	ORTHOMCL762	ORTHOMCL739	ORTHOMCL774	ORTHOMCL743	ORTHOMCL743	ORTHOMCL740	ORTHOMCL739	ORTHOMCL737	ORTHOMCL741	ORTHOMCL740
ORTHOMCL738	ORTHOMCL763	ORTHOMCL740	ORTHOMCL775	ORTHOMCL744	ORTHOMCL744	ORTHOMCL741	ORTHOMCL740	ORTHOMCL738	ORTHOMCL742	ORTHOMCL741
ORTHOMCL739	ORTHOMCL764	ORTHOMCL741	ORTHOMCL776	ORTHOMCL745	ORTHOMCL745	ORTHOMCL742	ORTHOMCL741	ORTHOMCL739	ORTHOMCL743	ORTHOMCL742
ORTHOMCL740	ORTHOMCL765	ORTHOMCL742	ORTHOMCL777	ORTHOMCL746	ORTHOMCL746	ORTHOMCL743	ORTHOMCL742	ORTHOMCL740	ORTHOMCL744	ORTHOMCL743
ORTHOMCL741	ORTHOMCL766	ORTHOMCL743	ORTHOMCL778	ORTHOMCL747	ORTHOMCL748	ORTHOMCL744	ORTHOMCL743	ORTHOMCL741	ORTHOMCL745	ORTHOMCL744
ORTHOMCL742	ORTHOMCL767	ORTHOMCL744	ORTHOMCL779	ORTHOMCL748	ORTHOMCL749	ORTHOMCL745	ORTHOMCL744	ORTHOMCL742	ORTHOMCL746	ORTHOMCL745
ORTHOMCL743	ORTHOMCL768	ORTHOMCL745	ORTHOMCL780	ORTHOMCL749	ORTHOMCL750	ORTHOMCL746	ORTHOMCL745	ORTHOMCL743	ORTHOMCL747	ORTHOMCL746
ORTHOMCL744	ORTHOMCL769	ORTHOMCL746	ORTHOMCL781	ORTHOMCL750	ORTHOMCL751	ORTHOMCL747	ORTHOMCL746	ORTHOMCL744	ORTHOMCL748	ORTHOMCL747
ORTHOMCL745	ORTHOMCL770	ORTHOMCL747	ORTHOMCL782	ORTHOMCL751	ORTHOMCL752	ORTHOMCL748	ORTHOMCL747	ORTHOMCL745	ORTHOMCL749	ORTHOMCL748
ORTHOMCL746	ORTHOMCL771	ORTHOMCL748	ORTHOMCL783	ORTHOMCL752	ORTHOMCL753	ORTHOMCL749	ORTHOMCL748	ORTHOMCL746	ORTHOMCL750	ORTHOMCL749
ORTHOMCL747	ORTHOMCL772	ORTHOMCL749	ORTHOMCL784	ORTHOMCL753	ORTHOMCL754	ORTHOMCL750	ORTHOMCL749	ORTHOMCL747	ORTHOMCL751	ORTHOMCL750
ORTHOMCL748	ORTHOMCL773	ORTHOMCL750	ORTHOMCL785	ORTHOMCL754	ORTHOMCL755	ORTHOMCL751	ORTHOMCL750	ORTHOMCL748	ORTHOMCL752	ORTHOMCL751
ORTHOMCL749	ORTHOMCL774	ORTHOMCL751	ORTHOMCL786	ORTHOMCL755	ORTHOMCL756	ORTHOMCL752	ORTHOMCL751	ORTHOMCL749	ORTHOMCL753	ORTHOMCL752
ORTHOMCL750	ORTHOMCL775	ORTHOMCL752	ORTHOMCL787	ORTHOMCL756	ORTHOMCL757	ORTHOMCL753	ORTHOMCL752	ORTHOMCL750	ORTHOMCL754	ORTHOMCL753
ORTHOMCL751	ORTHOMCL776	ORTHOMCL753	ORTHOMCL789	ORTHOMCL757	ORTHOMCL758	ORTHOMCL754	ORTHOMCL753	ORTHOMCL751	ORTHOMCL755	ORTHOMCL754
ORTHOMCL752	ORTHOMCL777	ORTHOMCL754	ORTHOMCL790	ORTHOMCL758	ORTHOMCL759	ORTHOMCL755	ORTHOMCL754	ORTHOMCL752	ORTHOMCL756	ORTHOMCL755
ORTHOMCL753	ORTHOMCL778	ORTHOMCL755	ORTHOMCL791	ORTHOMCL759	ORTHOMCL760	ORTHOMCL756	ORTHOMCL755	ORTHOMCL753	ORTHOMCL757	ORTHOMCL756
ORTHOMCL754	ORTHOMCL779	ORTHOMCL756	ORTHOMCL792	ORTHOMCL760	ORTHOMCL761	ORTHOMCL757	ORTHOMCL756	ORTHOMCL754	ORTHOMCL758	ORTHOMCL758
ORTHOMCL755	ORTHOMCL780	ORTHOMCL757	ORTHOMCL793	ORTHOMCL761	ORTHOMCL762	ORTHOMCL758	ORTHOMCL757	ORTHOMCL755	ORTHOMCL759	ORTHOMCL759
ORTHOMCL756	ORTHOMCL781	ORTHOMCL758	ORTHOMCL794	ORTHOMCL762	ORTHOMCL763	ORTHOMCL759	ORTHOMCL758	ORTHOMCL756	ORTHOMCL760	ORTHOMCL760
ORTHOMCL757	ORTHOMCL782	ORTHOMCL759	ORTHOMCL795	ORTHOMCL763	ORTHOMCL764	ORTHOMCL760	ORTHOMCL759	ORTHOMCL757	ORTHOMCL761	ORTHOMCL761
ORTHOMCL758	ORTHOMCL783	ORTHOMCL760	ORTHOMCL796	ORTHOMCL764	ORTHOMCL765	ORTHOMCL761	ORTHOMCL760	ORTHOMCL758	ORTHOMCL762	ORTHOMCL762
ORTHOMCL759	ORTHOMCL784	ORTHOMCL761	ORTHOMCL797	ORTHOMCL765	ORTHOMCL766	ORTHOMCL762	ORTHOMCL761	ORTHOMCL759	ORTHOMCL763	ORTHOMCL763
ORTHOMCL760	ORTHOMCL785	ORTHOMCL762	ORTHOMCL798	ORTHOMCL766	ORTHOMCL767	ORTHOMCL763	ORTHOMCL762	ORTHOMCL760	ORTHOMCL764	ORTHOMCL764
ORTHOMCL761	ORTHOMCL786	ORTHOMCL763	ORTHOMCL799	ORTHOMCL767	ORTHOMCL768	ORTHOMCL764	ORTHOMCL763	ORTHOMCL761	ORTHOMCL765	ORTHOMCL765
ORTHOMCL762	ORTHOMCL787	ORTHOMCL764	ORTHOMCL800	ORTHOMCL768	ORTHOMCL769	ORTHOMCL765	ORTHOMCL764	ORTHOMCL762	ORTHOMCL766	ORTHOMCL766
ORTHOMCL763	ORTHOMCL789	ORTHOMCL765	ORTHOMCL801	ORTHOMCL769	ORTHOMCL770	ORTHOMCL766	ORTHOMCL765	ORTHOMCL763	ORTHOMCL767	ORTHOMCL767
ORTHOMCL764	ORTHOMCL790	ORTHOMCL766	ORTHOMCL802	ORTHOMCL770	ORTHOMCL771	ORTHOMCL767	ORTHOMCL766	ORTHOMCL764	ORTHOMCL768	ORTHOMCL768
ORTHOMCL765	ORTHOMCL791	ORTHOMCL767	ORTHOMCL803	ORTHOMCL771	ORTHOMCL772	ORTHOMCL768	ORTHOMCL767	ORTHOMCL765	ORTHOMCL769	ORTHOMCL769
ORTHOMCL766	ORTHOMCL793	ORTHOMCL768	ORTHOMCL804	ORTHOMCL772	ORTHOMCL773	ORTHOMCL769	ORTHOMCL768	ORTHOMCL766	ORTHOMCL770	ORTHOMCL770
ORTHOMCL767	ORTHOMCL794	ORTHOMCL769	ORTHOMCL805	ORTHOMCL773	ORTHOMCL774	ORTHOMCL770	ORTHOMCL769	ORTHOMCL767	ORTHOMCL771	ORTHOMCL771
ORTHOMCL768	ORTHOMCL795	ORTHOMCL770	ORTHOMCL806	ORTHOMCL774	ORTHOMCL775	ORTHOMCL771	ORTHOMCL770	ORTHOMCL768	ORTHOMCL772	ORTHOMCL772
ORTHOMCL769	ORTHOMCL796	ORTHOMCL771	ORTHOMCL807	ORTHOMCL775	ORTHOMCL776	ORTHOMCL772	ORTHOMCL771	ORTHOMCL769	ORTHOMCL773	ORTHOMCL773
ORTHOMCL770	ORTHOMCL797	ORTHOMCL772	ORTHOMCL808	ORTHOMCL776	ORTHOMCL777	ORTHOMCL773	ORTHOMCL772	ORTHOMCL770	ORTHOMCL774	ORTHOMCL774
ORTHOMCL771	ORTHOMCL798	ORTHOMCL773	ORTHOMCL809	ORTHOMCL777	ORTHOMCL778	ORTHOMCL774	ORTHOMCL773	ORTHOMCL771	ORTHOMCL775	ORTHOMCL775
ORTHOMCL772	ORTHOMCL799	ORTHOMCL774	ORTHOMCL810	ORTHOMCL778	ORTHOMCL779	ORTHOMCL775	ORTHOMCL774	ORTHOMCL772	ORTHOMCL776	ORTHOMCL776
ORTHOMCL773	ORTHOMCL800	ORTHOMCL775	ORTHOMCL811	ORTHOMCL779	ORTHOMCL780	ORTHOMCL776	ORTHOMCL775	ORTHOMCL773	ORTHOMCL777	ORTHOMCL777
ORTHOMCL774	ORTHOMCL801	ORTHOMCL776	ORTHOMCL812	ORTHOMCL780	ORTHOMCL781	ORTHOMCL777	ORTHOMCL776	ORTHOMCL774	ORTHOMCL778	ORTHOMCL778
ORTHOMCL775	ORTHOMCL802	ORTHOMCL777	ORTHOMCL813	ORTHOMCL781	ORTHOMCL782	ORTHOMCL778	ORTHOMCL778	ORTHOMCL775	ORTHOMCL779	ORTHOMCL779
ORTHOMCL776	ORTHOMCL803	ORTHOMCL778	ORTHOMCL814	ORTHOMCL782	ORTHOMCL783	ORTHOMCL779	ORTHOMCL779	ORTHOMCL776	ORTHOMCL780	ORTHOMCL780
ORTHOMCL777	ORTHOMCL804	ORTHOMCL779	ORTHOMCL815	ORTHOMCL783	ORTHOMCL784	ORTHOMCL780	ORTHOMCL780	ORTHOMCL777	ORTHOMCL781	ORTHOMCL781
ORTHOMCL778	ORTHOMCL805	ORTHOMCL780	ORTHOMCL816	ORTHOMCL784	ORTHOMCL785	ORTHOMCL781	ORTHOMCL781	ORTHOMCL778	ORTHOMCL782	ORTHOMCL782
ORTHOMCL779	ORTHOMCL806	ORTHOMCL781	ORTHOMCL817	ORTHOMCL785	ORTHOMCL786	ORTHOMCL782	ORTHOMCL782	ORTHOMCL779	ORTHOMCL783	ORTHOMCL783
ORTHOMCL780	ORTHOMCL807	ORTHOMCL782	ORTHOMCL818	ORTHOMCL786	ORTHOMCL787	ORTHOMCL783	ORTHOMCL783	ORTHOMCL780	ORTHOMCL784	ORTHOMCL784
ORTHOMCL781	ORTHOMCL808	ORTHOMCL783	ORTHOMCL819	ORTHOMCL787	ORTHOMCL788	ORTHOMCL784	ORTHOMCL784	ORTHOMCL781	ORTHOMCL785	ORTHOMCL785
ORTHOMCL782	ORTHOMCL809	ORTHOMCL784	ORTHOMCL820	ORTHOMCL788	ORTHOMCL789	ORTHOMCL785	ORTHOMCL785	ORTHOMCL782	ORTHOMCL786	ORTHOMCL786
ORTHOMCL783	ORTHOMCL810	ORTHOMCL785	ORTHOMCL821	ORTHOMCL789	ORTHOMCL790	ORTHOMCL786	ORTHOMCL786	ORTHOMCL783	ORTHOMCL787	ORTHOMCL787
ORTHOMCL784	ORTHOMCL811	ORTHOMCL786	ORTHOMCL822	ORTHOMCL790	ORTHOMCL791	ORTHOMCL787	ORTHOMCL787	ORTHOMCL784	ORTHOMCL788	ORTHOMCL788
ORTHOMCL785	ORTHOMCL812	ORTHOMCL787	ORTHOMCL823	ORTHOMCL791	ORTHOMCL792	ORTHOMCL788	ORTHOMCL788	ORTHOMCL785	ORTHOMCL789	ORTHOMCL789
ORTHOMCL786	ORTHOMCL813	ORTHOMCL789	ORTHOMCL824	ORTHOMCL792	ORTHOMCL793	ORTHOMCL789	ORTHOMCL789	ORTHOMCL786	ORTHOMCL790	ORTHOMCL790
ORTHOMCL787	ORTHOMCL814	ORTHOMCL790	ORTHOMCL825	ORTHOMCL793	ORTHOMCL794	ORTHOMCL790	ORTHOMCL790	ORTHOMCL787	ORTHOMCL792	ORTHOMCL791
ORTHOMCL788	ORTHOMCL815	ORTHOMCL791	ORTHOMCL826	ORTHOMCL794	ORTHOMCL795	ORTHOMCL792	ORTHOMCL791	ORTHOMCL788	ORTHOMCL793	ORTHOMCL792
ORTHOMCL789	ORTHOMCL816	ORTHOMCL792	ORTHOMCL827	ORTHOMCL795	ORTHOMCL796	ORTHOMCL793	ORTHOMCL792	ORTHOMCL789	ORTHOMCL794	ORTHOMCL793
ORTHOMCL790	ORTHOMCL817	ORTHOMCL793	ORTHOMCL828	ORTHOMCL796	ORTHOMCL797	ORTHOMCL794	ORTHOMCL793	ORTHOMCL790	ORTHOMCL795	ORTHOMCL794
ORTHOMCL791	ORTHOMCL818	ORTHOMCL794	ORTHOMCL829	ORTHOMCL797	ORTHOMCL798	ORTHOMCL795	ORTHOMCL794	ORTHOMCL791	ORTHOMCL796	ORTHOMCL795
ORTHOMCL792	ORTHOMCL819	ORTHOMCL795	ORTHOMCL830	ORTHOMCL798	ORTHOMCL799	ORTHOMCL796	ORTHOMCL795	ORTHOMCL792	ORTHOMCL797	ORTHOMCL796
ORTHOMCL793	ORTHOMCL820	ORTHOMCL796	ORTHOMCL831	ORTHOMCL799	ORTHOMCL800	ORTHOMCL798	ORTHOMCL796	ORTHOMCL793	ORTHOMCL798	ORTHOMCL797
ORTHOMCL794	ORTHOMCL821	ORTHOMCL797	ORTHOMCL832	ORTHOMCL800	ORTHOMCL801	ORTHOMCL799	ORTHOMCL797	ORTHOMCL794	ORTHOMCL799	ORTHOMCL798
ORTHOMCL795	ORTHOMCL822	ORTHOMCL798	ORTHOMCL833	ORTHOMCL801	ORTHOMCL802	ORTHOMCL800	ORTHOMCL798	ORTHOMCL795	ORTHOMCL800	ORTHOMCL799
ORTHOMCL796	ORTHOMCL823	ORTHOMCL799	ORTHOMCL834	ORTHOMCL802	ORTHOMCL803	ORTHOMCL801	ORTHOMCL799	ORTHOMCL796	ORTHOMCL801	ORTHOMCL800
ORTHOMCL797	ORTHOMCL824	ORTHOMCL800	ORTHOMCL835	ORTHOMCL803	ORTHOMCL804	ORTHOMCL802	ORTHOMCL800	ORTHOMCL797	ORTHOMCL802	ORTHOMCL801
ORTHOMCL798	ORTHOMCL825	ORTHOMCL801	ORTHOMCL836	ORTHOMCL804	ORTHOMCL805	ORTHOMCL803	ORTHOMCL801	ORTHOMCL798	ORTHOMCL803	ORTHOMCL802
ORTHOMCL799	ORTHOMCL826	ORTHOMCL802	ORTHOMCL837	ORTHOMCL805	ORTHOMCL806	ORTHOMCL804	ORTHOMCL802	ORTHOMCL799	ORTHOMCL804	ORTHOMCL803
ORTHOMCL800	ORTHOMCL827	ORTHOMCL803	ORTHOMCL838	ORTHOMCL806	ORTHOMCL807	ORTHOMCL805	ORTHOMCL803	ORTHOMCL800	ORTHOMCL805	ORTHOMCL804
ORTHOMCL801	ORTHOMCL828	ORTHOMCL804	ORTHOMCL839	ORTHOMCL807	ORTHOMCL808	ORTHOMCL806	ORTHOMCL804	ORTHOMCL801	ORTHOMCL806	ORTHOMCL805
ORTHOMCL802	ORTHOMCL829	ORTHOMCL805	ORTHOMCL840	ORTHOMCL808	ORTHOMCL809	ORTHOMCL807	ORTHOMCL805	ORTHOMCL802	ORTHOMCL807	ORTHOMCL806
ORTHOMCL803	ORTHOMCL830	ORTHOMCL806	ORTHOMCL841	ORTHOMCL809	ORTHOMCL810	ORTHOMCL808	ORTHOMCL806	ORTHOMCL803	ORTHOMCL808	ORTHOMCL807
ORTHOMCL804	ORTHOMCL831	ORTHOMCL807	ORTHOMCL842	ORTHOMCL810	ORTHOMCL811	ORTHOMCL809	ORTHOMCL807	ORTHOMCL804	ORTHOMCL809	ORTHOMCL808
ORTHOMCL805	ORTHOMCL832	ORTHOMCL808	ORTHOMCL843	ORTHOMCL811	ORTHOMCL812	ORTHOMCL810	ORTHOMCL808	ORTHOMCL805	ORTHOMCL810	ORTHOMCL809
ORTHOMCL806	ORTHOMCL834	ORTHOMCL809	ORTHOMCL844	ORTHOMCL812	ORTHOMCL813	ORTHOMCL811	ORTHOMCL809	ORTHOMCL806	ORTHOMCL811	ORTHOMCL810
ORTHOMCL807	ORTHOMCL835	ORTHOMCL810	ORTHOMCL845	ORTHOMCL813	ORTHOMCL814	ORTHOMCL812	ORTHOMCL810	ORTHOMCL807	ORTHOMCL812	ORTHOMCL811
ORTHOMCL808	ORTHOMCL837	ORTHOMCL811	ORTHOMCL846	ORTHOMCL814	ORTHOMCL815	ORTHOMCL813	ORTHOMCL811	ORTHOMCL808	ORTHOMCL813	ORTHOMCL812
ORTHOMCL809	ORTHOMCL838	ORTHOMCL812	ORTHOMCL847	ORTHOMCL815	ORTHOMCL816	ORTHOMCL814	ORTHOMCL812	ORTHOMCL809	ORTHOMCL814	ORTHOMCL813
ORTHOMCL810	ORTHOMCL839	ORTHOMCL813	ORTHOMCL848	ORTHOMCL816	ORTHOMCL817	ORTHOMCL815	ORTHOMCL813	ORTHOMCL810	ORTHOMCL815	ORTHOMCL814
ORTHOMCL811	ORTHOMCL840	ORTHOMCL814	ORTHOMCL849	ORTHOMCL817	ORTHOMCL818	ORTHOMCL816	ORTHOMCL814	ORTHOMCL811	ORTHOMCL816	ORTHOMCL815
ORTHOMCL812	ORTHOMCL841	ORTHOMCL815	ORTHOMCL850	ORTHOMCL818	ORTHOMCL819	ORTHOMCL817	ORTHOMCL815	ORTHOMCL812	ORTHOMCL817	ORTHOMCL816
ORTHOMCL813	ORTHOMCL842	ORTHOMCL816	ORTHOMCL851	ORTHOMCL819	ORTHOMCL820	ORTHOMCL818	ORTHOMCL816	ORTHOMCL813	ORTHOMCL818	ORTHOMCL817
ORTHOMCL814	ORTHOMCL843	ORTHOMCL817	ORTHOMCL852	ORTHOMCL820	ORTHOMCL821	ORTHOMCL819	ORTHOMCL817	ORTHOMCL814	ORTHOMCL819	ORTHOMCL818
ORTHOMCL815	ORTHOMCL844	ORTHOMCL818	ORTHOMCL853	ORTHOMCL821	ORTHOMCL822	ORTHOMCL820	ORTHOMCL818	ORTHOMCL815	ORTHOMCL820	ORTHOMCL819
ORTHOMCL816	ORTHOMCL845	ORTHOMCL820	ORTHOMCL854	ORTHOMCL822	ORTHOMCL823	ORTHOMCL821	ORTHOMCL819	ORTHOMCL816	ORTHOMCL821	ORTHOMCL820
ORTHOMCL817	ORTHOMCL846	ORTHOMCL821	ORTHOMCL855	ORTHOMCL823	ORTHOMCL824	ORTHOMCL822	ORTHOMCL820	ORTHOMCL817	ORTHOMCL822	ORTHOMCL821
ORTHOMCL818	ORTHOMCL847	ORTHOMCL822	ORTHOMCL856	ORTHOMCL824	ORTHOMCL825	ORTHOMCL823	ORTHOMCL821	ORTHOMCL818	ORTHOMCL823	ORTHOMCL822
ORTHOMCL819	ORTHOMCL848	ORTHOMCL823	ORTHOMCL857	ORTHOMCL825	ORTHOMCL826	ORTHOMCL824	ORTHOMCL822	ORTHOMCL819	ORTHOMCL824	ORTHOMCL823
ORTHOMCL820	ORTHOMCL849	ORTHOMCL824	ORTHOMCL859	ORTHOMCL826	ORTHOMCL827	ORTHOMCL825	ORTHOMCL823	ORTHOMCL820	ORTHOMCL825	ORTHOMCL824
ORTHOMCL821	ORTHOMCL850	ORTHOMCL825	ORTHOMCL860	ORTHOMCL827	ORTHOMCL828	ORTHOMCL826	ORTHOMCL824	ORTHOMCL821	ORTHOMCL826	ORTHOMCL825
ORTHOMCL822	ORTHOMCL851	ORTHOMCL826	ORTHOMCL861	ORTHOMCL828	ORTHOMCL829	ORTHOMCL827	ORTHOMCL825	ORTHOMCL822	ORTHOMCL827	ORTHOMCL826
ORTHOMCL823	ORTHOMCL852	ORTHOMCL827	ORTHOMCL862	ORTHOMCL829	ORTHOMCL830	ORTHOMCL828	ORTHOMCL826	ORTHOMCL823	ORTHOMCL828	ORTHOMCL827
ORTHOMCL824	ORTHOMCL853	ORTHOMCL828	ORTHOMCL863	ORTHOMCL830	ORTHOMCL831	ORTHOMCL829	ORTHOMCL827	ORTHOMCL824	ORTHOMCL829	ORTHOMCL828
ORTHOMCL825	ORTHOMCL854	ORTHOMCL829	ORTHOMCL864	ORTHOMCL831	ORTHOMCL832	ORTHOMCL830	ORTHOMCL828	ORTHOMCL825	ORTHOMCL830	ORTHOMCL829
ORTHOMCL826	ORTHOMCL855	ORTHOMCL830	ORTHOMCL865	ORTHOMCL832	ORTHOMCL833	ORTHOMCL831	ORTHOMCL829	ORTHOMCL826	ORTHOMCL831	ORTHOMCL830
ORTHOMCL827	ORTHOMCL856	ORTHOMCL831	ORTHOMCL866	ORTHOMCL833	ORTHOMCL834	ORTHOMCL832	ORTHOMCL830	ORTHOMCL827	ORTHOMCL832	ORTHOMCL831
ORTHOMCL828	ORTHOMCL858	ORTHOMCL832	ORTHOMCL867	ORTHOMCL834	ORTHOMCL835	ORTHOMCL833	ORTHOMCL831	ORTHOMCL828	ORTHOMCL834	ORTHOMCL832
ORTHOMCL829	ORTHOMCL859	ORTHOMCL833	ORTHOMCL868	ORTHOMCL835	ORTHOMCL836	ORTHOMCL834	ORTHOMCL832	ORTHOMCL829	ORTHOMCL835	ORTHOMCL833
ORTHOMCL830	ORTHOMCL860	ORTHOMCL834	ORTHOMCL869	ORTHOMCL836	ORTHOMCL837	ORTHOMCL835	ORTHOMCL833	ORTHOMCL830	ORTHOMCL837	ORTHOMCL834
ORTHOMCL831	ORTHOMCL861	ORTHOMCL835	ORTHOMCL870	ORTHOMCL837	ORTHOMCL838	ORTHOMCL836	ORTHOMCL834	ORTHOMCL831	ORTHOMCL838	ORTHOMCL835
ORTHOMCL832	ORTHOMCL862	ORTHOMCL836	ORTHOMCL871	ORTHOMCL838	ORTHOMCL839	ORTHOMCL837	ORTHOMCL835	ORTHOMCL832	ORTHOMCL839	ORTHOMCL836
ORTHOMCL834	ORTHOMCL863	ORTHOMCL837	ORTHOMCL872	ORTHOMCL839	ORTHOMCL840	ORTHOMCL838	ORTHOMCL836	ORTHOMCL833	ORTHOMCL840	ORTHOMCL837
ORTHOMCL835	ORTHOMCL864	ORTHOMCL838	ORTHOMCL873	ORTHOMCL840	ORTHOMCL841	ORTHOMCL839	ORTHOMCL837	ORTHOMCL834	ORTHOMCL841	ORTHOMCL838
ORTHOMCL836	ORTHOMCL865	ORTHOMCL839	ORTHOMCL874	ORTHOMCL841	ORTHOMCL842	ORTHOMCL840	ORTHOMCL838	ORTHOMCL835	ORTHOMCL842	ORTHOMCL839
ORTHOMCL837	ORTHOMCL866	ORTHOMCL840	ORTHOMCL875	ORTHOMCL842	ORTHOMCL843	ORTHOMCL841	ORTHOMCL839	ORTHOMCL836	ORTHOMCL843	ORTHOMCL840
ORTHOMCL838	ORTHOMCL867	ORTHOMCL841	ORTHOMCL876	ORTHOMCL843	ORTHOMCL844	ORTHOMCL842	ORTHOMCL840	ORTHOMCL837	ORTHOMCL844	ORTHOMCL841
ORTHOMCL839	ORTHOMCL868	ORTHOMCL842	ORTHOMCL877	ORTHOMCL844	ORTHOMCL845	ORTHOMCL843	ORTHOMCL841	ORTHOMCL838	ORTHOMCL845	ORTHOMCL842
ORTHOMCL840	ORTHOMCL869	ORTHOMCL843	ORTHOMCL878	ORTHOMCL845	ORTHOMCL846	ORTHOMCL844	ORTHOMCL842	ORTHOMCL839	ORTHOMCL846	ORTHOMCL843
ORTHOMCL841	ORTHOMCL870	ORTHOMCL844	ORTHOMCL879	ORTHOMCL846	ORTHOMCL847	ORTHOMCL845	ORTHOMCL843	ORTHOMCL840	ORTHOMCL847	ORTHOMCL844
ORTHOMCL842	ORTHOMCL871	ORTHOMCL845	ORTHOMCL880	ORTHOMCL847	ORTHOMCL848	ORTHOMCL846	ORTHOMCL844	ORTHOMCL841	ORTHOMCL848	ORTHOMCL845
ORTHOMCL843	ORTHOMCL872	ORTHOMCL846	ORTHOMCL881	ORTHOMCL848	ORTHOMCL849	ORTHOMCL847	ORTHOMCL845	ORTHOMCL842	ORTHOMCL849	ORTHOMCL846
ORTHOMCL844	ORTHOMCL873	ORTHOMCL847	ORTHOMCL882	ORTHOMCL849	ORTHOMCL850	ORTHOMCL848	ORTHOMCL846	ORTHOMCL843	ORTHOMCL850	ORTHOMCL847
ORTHOMCL845	ORTHOMCL874	ORTHOMCL848	ORTHOMCL883	ORTHOMCL850	ORTHOMCL851	ORTHOMCL849	ORTHOMCL847	ORTHOMCL844	ORTHOMCL851	ORTHOMCL848
ORTHOMCL846	ORTHOMCL875	ORTHOMCL849	ORTHOMCL885	ORTHOMCL851	ORTHOMCL852	ORTHOMCL850	ORTHOMCL848	ORTHOMCL845	ORTHOMCL852	ORTHOMCL849
ORTHOMCL847	ORTHOMCL876	ORTHOMCL850	ORTHOMCL886	ORTHOMCL852	ORTHOMCL853	ORTHOMCL851	ORTHOMCL849	ORTHOMCL846	ORTHOMCL853	ORTHOMCL850
ORTHOMCL848	ORTHOMCL877	ORTHOMCL851	ORTHOMCL887	ORTHOMCL853	ORTHOMCL854	ORTHOMCL852	ORTHOMCL850	ORTHOMCL847	ORTHOMCL854	ORTHOMCL851
ORTHOMCL849	ORTHOMCL878	ORTHOMCL852	ORTHOMCL888	ORTHOMCL854	ORTHOMCL855	ORTHOMCL853	ORTHOMCL851	ORTHOMCL848	ORTHOMCL855	ORTHOMCL852
ORTHOMCL850	ORTHOMCL880	ORTHOMCL853	ORTHOMCL889	ORTHOMCL855	ORTHOMCL856	ORTHOMCL854	ORTHOMCL852	ORTHOMCL849	ORTHOMCL856	ORTHOMCL853
ORTHOMCL851	ORTHOMCL881	ORTHOMCL854	ORTHOMCL890	ORTHOMCL856	ORTHOMCL857	ORTHOMCL855	ORTHOMCL853	ORTHOMCL850	ORTHOMCL857	ORTHOMCL854
ORTHOMCL852	ORTHOMCL882	ORTHOMCL855	ORTHOMCL891	ORTHOMCL857	ORTHOMCL858	ORTHOMCL856	ORTHOMCL854	ORTHOMCL851	ORTHOMCL858	ORTHOMCL855
ORTHOMCL853	ORTHOMCL884	ORTHOMCL856	ORTHOMCL892	ORTHOMCL859	ORTHOMCL859	ORTHOMCL857	ORTHOMCL855	ORTHOMCL852	ORTHOMCL859	ORTHOMCL856
ORTHOMCL854	ORTHOMCL885	ORTHOMCL857	ORTHOMCL893	ORTHOMCL860	ORTHOMCL860	ORTHOMCL858	ORTHOMCL856	ORTHOMCL853	ORTHOMCL860	ORTHOMCL857
ORTHOMCL855	ORTHOMCL886	ORTHOMCL858	ORTHOMCL894	ORTHOMCL861	ORTHOMCL861	ORTHOMCL859	ORTHOMCL857	ORTHOMCL854	ORTHOMCL861	ORTHOMCL858
ORTHOMCL856	ORTHOMCL887	ORTHOMCL859	ORTHOMCL895	ORTHOMCL862	ORTHOMCL862	ORTHOMCL860	ORTHOMCL858	ORTHOMCL855	ORTHOMCL862	ORTHOMCL859
ORTHOMCL857	ORTHOMCL888	ORTHOMCL860	ORTHOMCL896	ORTHOMCL863	ORTHOMCL863	ORTHOMCL861	ORTHOMCL859	ORTHOMCL856	ORTHOMCL863	ORTHOMCL860
ORTHOMCL858	ORTHOMCL889	ORTHOMCL861	ORTHOMCL897	ORTHOMCL864	ORTHOMCL864	ORTHOMCL862	ORTHOMCL860	ORTHOMCL857	ORTHOMCL864	ORTHOMCL861
ORTHOMCL859	ORTHOMCL890	ORTHOMCL862	ORTHOMCL898	ORTHOMCL865	ORTHOMCL865	ORTHOMCL864	ORTHOMCL861	ORTHOMCL858	ORTHOMCL865	ORTHOMCL862
ORTHOMCL860	ORTHOMCL891	ORTHOMCL863	ORTHOMCL902	ORTHOMCL866	ORTHOMCL866	ORTHOMCL865	ORTHOMCL862	ORTHOMCL859	ORTHOMCL866	ORTHOMCL863
ORTHOMCL861	ORTHOMCL892	ORTHOMCL864	ORTHOMCL903	ORTHOMCL867	ORTHOMCL867	ORTHOMCL866	ORTHOMCL863	ORTHOMCL860	ORTHOMCL867	ORTHOMCL864
ORTHOMCL862	ORTHOMCL893	ORTHOMCL865	ORTHOMCL904	ORTHOMCL868	ORTHOMCL868	ORTHOMCL867	ORTHOMCL864	ORTHOMCL861	ORTHOMCL868	ORTHOMCL865
ORTHOMCL863	ORTHOMCL894	ORTHOMCL866	ORTHOMCL905	ORTHOMCL869	ORTHOMCL869	ORTHOMCL868	ORTHOMCL865	ORTHOMCL862	ORTHOMCL869	ORTHOMCL866
ORTHOMCL864	ORTHOMCL895	ORTHOMCL867	ORTHOMCL906	ORTHOMCL870	ORTHOMCL870	ORTHOMCL869	ORTHOMCL866	ORTHOMCL863	ORTHOMCL870	ORTHOMCL867
ORTHOMCL865	ORTHOMCL896	ORTHOMCL868	ORTHOMCL907	ORTHOMCL871	ORTHOMCL871	ORTHOMCL870	ORTHOMCL867	ORTHOMCL864	ORTHOMCL871	ORTHOMCL868
ORTHOMCL866	ORTHOMCL897	ORTHOMCL869	ORTHOMCL908	ORTHOMCL872	ORTHOMCL872	ORTHOMCL871	ORTHOMCL868	ORTHOMCL865	ORTHOMCL872	ORTHOMCL870
ORTHOMCL867	ORTHOMCL898	ORTHOMCL870	ORTHOMCL909	ORTHOMCL873	ORTHOMCL873	ORTHOMCL872	ORTHOMCL869	ORTHOMCL866	ORTHOMCL873	ORTHOMCL871
ORTHOMCL868	ORTHOMCL899	ORTHOMCL871	ORTHOMCL910	ORTHOMCL874	ORTHOMCL874	ORTHOMCL873	ORTHOMCL870	ORTHOMCL867	ORTHOMCL874	ORTHOMCL872
ORTHOMCL869	ORTHOMCL901	ORTHOMCL872	ORTHOMCL911	ORTHOMCL875	ORTHOMCL875	ORTHOMCL874	ORTHOMCL871	ORTHOMCL868	ORTHOMCL875	ORTHOMCL873
ORTHOMCL870	ORTHOMCL902	ORTHOMCL873	ORTHOMCL912	ORTHOMCL876	ORTHOMCL877	ORTHOMCL875	ORTHOMCL872	ORTHOMCL869	ORTHOMCL876	ORTHOMCL874
ORTHOMCL871	ORTHOMCL903	ORTHOMCL874	ORTHOMCL913	ORTHOMCL877	ORTHOMCL878	ORTHOMCL876	ORTHOMCL873	ORTHOMCL870	ORTHOMCL877	ORTHOMCL875
ORTHOMCL872	ORTHOMCL904	ORTHOMCL875	ORTHOMCL914	ORTHOMCL878	ORTHOMCL879	ORTHOMCL877	ORTHOMCL874	ORTHOMCL871	ORTHOMCL878	ORTHOMCL876
ORTHOMCL873	ORTHOMCL905	ORTHOMCL876	ORTHOMCL915	ORTHOMCL879	ORTHOMCL880	ORTHOMCL878	ORTHOMCL875	ORTHOMCL872	ORTHOMCL879	ORTHOMCL877
ORTHOMCL874	ORTHOMCL906	ORTHOMCL877	ORTHOMCL916	ORTHOMCL880	ORTHOMCL881	ORTHOMCL879	ORTHOMCL876	ORTHOMCL873	ORTHOMCL880	ORTHOMCL878
ORTHOMCL875	ORTHOMCL907	ORTHOMCL878	ORTHOMCL917	ORTHOMCL881	ORTHOMCL882	ORTHOMCL880	ORTHOMCL877	ORTHOMCL874	ORTHOMCL881	ORTHOMCL879
ORTHOMCL876	ORTHOMCL908	ORTHOMCL879	ORTHOMCL918	ORTHOMCL882	ORTHOMCL883	ORTHOMCL881	ORTHOMCL878	ORTHOMCL875	ORTHOMCL882	ORTHOMCL880
ORTHOMCL877	ORTHOMCL909	ORTHOMCL880	ORTHOMCL919	ORTHOMCL883	ORTHOMCL884	ORTHOMCL882	ORTHOMCL879	ORTHOMCL876	ORTHOMCL884	ORTHOMCL881
ORTHOMCL878	ORTHOMCL910	ORTHOMCL881	ORTHOMCL920	ORTHOMCL884	ORTHOMCL885	ORTHOMCL883	ORTHOMCL880	ORTHOMCL877	ORTHOMCL885	ORTHOMCL882
ORTHOMCL879	ORTHOMCL911	ORTHOMCL882	ORTHOMCL921	ORTHOMCL885	ORTHOMCL886	ORTHOMCL884	ORTHOMCL881	ORTHOMCL878	ORTHOMCL886	ORTHOMCL883
ORTHOMCL880	ORTHOMCL912	ORTHOMCL883	ORTHOMCL922	ORTHOMCL886	ORTHOMCL887	ORTHOMCL885	ORTHOMCL882	ORTHOMCL879	ORTHOMCL887	ORTHOMCL884
ORTHOMCL881	ORTHOMCL913	ORTHOMCL884	ORTHOMCL923	ORTHOMCL887	ORTHOMCL888	ORTHOMCL886	ORTHOMCL883	ORTHOMCL880	ORTHOMCL888	ORTHOMCL885
ORTHOMCL882	ORTHOMCL914	ORTHOMCL885	ORTHOMCL924	ORTHOMCL888	ORTHOMCL889	ORTHOMCL887	ORTHOMCL884	ORTHOMCL881	ORTHOMCL889	ORTHOMCL886
ORTHOMCL883	ORTHOMCL915	ORTHOMCL886	ORTHOMCL925	ORTHOMCL889	ORTHOMCL890	ORTHOMCL888	ORTHOMCL885	ORTHOMCL882	ORTHOMCL890	ORTHOMCL887
ORTHOMCL884	ORTHOMCL916	ORTHOMCL887	ORTHOMCL926	ORTHOMCL890	ORTHOMCL891	ORTHOMCL889	ORTHOMCL886	ORTHOMCL883	ORTHOMCL891	ORTHOMCL888
ORTHOMCL885	ORTHOMCL917	ORTHOMCL888	ORTHOMCL927	ORTHOMCL891	ORTHOMCL892	ORTHOMCL890	ORTHOMCL887	ORTHOMCL884	ORTHOMCL892	ORTHOMCL889
ORTHOMCL886	ORTHOMCL918	ORTHOMCL889	ORTHOMCL928	ORTHOMCL892	ORTHOMCL893	ORTHOMCL891	ORTHOMCL888	ORTHOMCL885	ORTHOMCL893	ORTHOMCL890
ORTHOMCL887	ORTHOMCL919	ORTHOMCL890	ORTHOMCL929	ORTHOMCL893	ORTHOMCL894	ORTHOMCL892	ORTHOMCL889	ORTHOMCL886	ORTHOMCL894	ORTHOMCL891
ORTHOMCL888	ORTHOMCL920	ORTHOMCL891	ORTHOMCL930	ORTHOMCL894	ORTHOMCL895	ORTHOMCL893	ORTHOMCL890	ORTHOMCL887	ORTHOMCL895	ORTHOMCL892
ORTHOMCL889	ORTHOMCL921	ORTHOMCL892	ORTHOMCL931	ORTHOMCL895	ORTHOMCL896	ORTHOMCL894	ORTHOMCL891	ORTHOMCL888	ORTHOMCL896	ORTHOMCL893
ORTHOMCL890	ORTHOMCL922	ORTHOMCL893	ORTHOMCL932	ORTHOMCL896	ORTHOMCL897	ORTHOMCL895	ORTHOMCL892	ORTHOMCL889	ORTHOMCL897	ORTHOMCL894
ORTHOMCL891	ORTHOMCL923	ORTHOMCL894	ORTHOMCL933	ORTHOMCL897	ORTHOMCL898	ORTHOMCL896	ORTHOMCL893	ORTHOMCL890	ORTHOMCL898	ORTHOMCL895
ORTHOMCL892	ORTHOMCL924	ORTHOMCL895	ORTHOMCL934	ORTHOMCL898	ORTHOMCL901	ORTHOMCL897	ORTHOMCL894	ORTHOMCL891	ORTHOMCL899	ORTHOMCL896
ORTHOMCL893	ORTHOMCL925	ORTHOMCL896	ORTHOMCL936	ORTHOMCL899	ORTHOMCL902	ORTHOMCL898	ORTHOMCL895	ORTHOMCL892	ORTHOMCL900	ORTHOMCL897
ORTHOMCL894	ORTHOMCL926	ORTHOMCL897	ORTHOMCL937	ORTHOMCL900	ORTHOMCL903	ORTHOMCL900	ORTHOMCL896	ORTHOMCL893	ORTHOMCL901	ORTHOMCL898
ORTHOMCL895	ORTHOMCL927	ORTHOMCL898	ORTHOMCL938	ORTHOMCL901	ORTHOMCL904	ORTHOMCL901	ORTHOMCL897	ORTHOMCL894	ORTHOMCL902	ORTHOMCL899
ORTHOMCL896	ORTHOMCL928	ORTHOMCL899	ORTHOMCL939	ORTHOMCL902	ORTHOMCL905	ORTHOMCL902	ORTHOMCL898	ORTHOMCL896	ORTHOMCL903	ORTHOMCL900
ORTHOMCL897	ORTHOMCL929	ORTHOMCL900	ORTHOMCL940	ORTHOMCL903	ORTHOMCL906	ORTHOMCL903	ORTHOMCL899	ORTHOMCL897	ORTHOMCL904	ORTHOMCL901
ORTHOMCL898	ORTHOMCL931	ORTHOMCL901	ORTHOMCL941	ORTHOMCL904	ORTHOMCL907	ORTHOMCL904	ORTHOMCL900	ORTHOMCL898	ORTHOMCL905	ORTHOMCL902
ORTHOMCL899	ORTHOMCL932	ORTHOMCL902	ORTHOMCL943	ORTHOMCL905	ORTHOMCL908	ORTHOMCL905	ORTHOMCL902	ORTHOMCL899	ORTHOMCL906	ORTHOMCL903
ORTHOMCL900	ORTHOMCL933	ORTHOMCL903	ORTHOMCL944	ORTHOMCL906	ORTHOMCL909	ORTHOMCL906	ORTHOMCL903	ORTHOMCL900	ORTHOMCL907	ORTHOMCL904
ORTHOMCL901	ORTHOMCL934	ORTHOMCL904	ORTHOMCL945	ORTHOMCL907	ORTHOMCL910	ORTHOMCL907	ORTHOMCL904	ORTHOMCL901	ORTHOMCL908	ORTHOMCL905
ORTHOMCL902	ORTHOMCL936	ORTHOMCL905	ORTHOMCL946	ORTHOMCL908	ORTHOMCL912	ORTHOMCL908	ORTHOMCL905	ORTHOMCL902	ORTHOMCL909	ORTHOMCL906
ORTHOMCL903	ORTHOMCL937	ORTHOMCL906	ORTHOMCL947	ORTHOMCL909	ORTHOMCL913	ORTHOMCL909	ORTHOMCL906	ORTHOMCL903	ORTHOMCL910	ORTHOMCL907
ORTHOMCL904	ORTHOMCL938	ORTHOMCL907	ORTHOMCL948	ORTHOMCL910	ORTHOMCL914	ORTHOMCL910	ORTHOMCL907	ORTHOMCL904	ORTHOMCL911	ORTHOMCL908
ORTHOMCL905	ORTHOMCL939	ORTHOMCL908	ORTHOMCL950	ORTHOMCL911	ORTHOMCL915	ORTHOMCL911	ORTHOMCL908	ORTHOMCL905	ORTHOMCL912	ORTHOMCL909
ORTHOMCL906	ORTHOMCL940	ORTHOMCL909	ORTHOMCL951	ORTHOMCL912	ORTHOMCL916	ORTHOMCL912	ORTHOMCL909	ORTHOMCL906	ORTHOMCL913	ORTHOMCL910
ORTHOMCL907	ORTHOMCL941	ORTHOMCL910	ORTHOMCL952	ORTHOMCL913	ORTHOMCL917	ORTHOMCL913	ORTHOMCL910	ORTHOMCL907	ORTHOMCL914	ORTHOMCL911
ORTHOMCL908	ORTHOMCL942	ORTHOMCL911	ORTHOMCL953	ORTHOMCL914	ORTHOMCL918	ORTHOMCL914	ORTHOMCL911	ORTHOMCL908	ORTHOMCL915	ORTHOMCL912
ORTHOMCL909	ORTHOMCL943	ORTHOMCL912	ORTHOMCL954	ORTHOMCL915	ORTHOMCL919	ORTHOMCL915	ORTHOMCL912	ORTHOMCL909	ORTHOMCL916	ORTHOMCL913
ORTHOMCL910	ORTHOMCL944	ORTHOMCL913	ORTHOMCL955	ORTHOMCL916	ORTHOMCL921	ORTHOMCL916	ORTHOMCL913	ORTHOMCL910	ORTHOMCL917	ORTHOMCL914
ORTHOMCL911	ORTHOMCL945	ORTHOMCL914	ORTHOMCL956	ORTHOMCL917	ORTHOMCL922	ORTHOMCL917	ORTHOMCL914	ORTHOMCL911	ORTHOMCL918	ORTHOMCL915
ORTHOMCL912	ORTHOMCL946	ORTHOMCL915	ORTHOMCL957	ORTHOMCL918	ORTHOMCL923	ORTHOMCL918	ORTHOMCL915	ORTHOMCL912	ORTHOMCL919	ORTHOMCL916
ORTHOMCL913	ORTHOMCL947	ORTHOMCL916	ORTHOMCL959	ORTHOMCL919	ORTHOMCL924	ORTHOMCL919	ORTHOMCL916	ORTHOMCL913	ORTHOMCL920	ORTHOMCL917
ORTHOMCL914	ORTHOMCL948	ORTHOMCL917	ORTHOMCL960	ORTHOMCL920	ORTHOMCL925	ORTHOMCL920	ORTHOMCL917	ORTHOMCL914	ORTHOMCL921	ORTHOMCL918
ORTHOMCL915	ORTHOMCL949	ORTHOMCL918	ORTHOMCL961	ORTHOMCL921	ORTHOMCL926	ORTHOMCL921	ORTHOMCL918	ORTHOMCL915	ORTHOMCL922	ORTHOMCL919
ORTHOMCL916	ORTHOMCL950	ORTHOMCL919	ORTHOMCL962	ORTHOMCL922	ORTHOMCL927	ORTHOMCL922	ORTHOMCL919	ORTHOMCL916	ORTHOMCL923	ORTHOMCL920
ORTHOMCL917	ORTHOMCL951	ORTHOMCL920	ORTHOMCL963	ORTHOMCL923	ORTHOMCL928	ORTHOMCL923	ORTHOMCL920	ORTHOMCL917	ORTHOMCL924	ORTHOMCL921
ORTHOMCL918	ORTHOMCL952	ORTHOMCL921	ORTHOMCL964	ORTHOMCL924	ORTHOMCL929	ORTHOMCL925	ORTHOMCL921	ORTHOMCL918	ORTHOMCL925	ORTHOMCL922
ORTHOMCL919	ORTHOMCL953	ORTHOMCL922	ORTHOMCL965	ORTHOMCL925	ORTHOMCL930	ORTHOMCL926	ORTHOMCL922	ORTHOMCL919	ORTHOMCL926	ORTHOMCL923
ORTHOMCL920	ORTHOMCL954	ORTHOMCL923	ORTHOMCL966	ORTHOMCL926	ORTHOMCL931	ORTHOMCL927	ORTHOMCL923	ORTHOMCL920	ORTHOMCL927	ORTHOMCL924
ORTHOMCL921	ORTHOMCL955	ORTHOMCL924	ORTHOMCL967	ORTHOMCL927	ORTHOMCL932	ORTHOMCL928	ORTHOMCL924	ORTHOMCL921	ORTHOMCL928	ORTHOMCL925
ORTHOMCL922	ORTHOMCL956	ORTHOMCL925	ORTHOMCL968	ORTHOMCL928	ORTHOMCL933	ORTHOMCL929	ORTHOMCL925	ORTHOMCL922	ORTHOMCL929	ORTHOMCL926
ORTHOMCL923	ORTHOMCL957	ORTHOMCL926	ORTHOMCL969	ORTHOMCL929	ORTHOMCL934	ORTHOMCL930	ORTHOMCL926	ORTHOMCL923	ORTHOMCL930	ORTHOMCL927
ORTHOMCL924	ORTHOMCL958	ORTHOMCL927	ORTHOMCL970	ORTHOMCL930	ORTHOMCL935	ORTHOMCL931	ORTHOMCL927	ORTHOMCL924	ORTHOMCL931	ORTHOMCL928
ORTHOMCL925	ORTHOMCL959	ORTHOMCL928	ORTHOMCL971	ORTHOMCL931	ORTHOMCL936	ORTHOMCL932	ORTHOMCL928	ORTHOMCL925	ORTHOMCL932	ORTHOMCL929
ORTHOMCL926	ORTHOMCL960	ORTHOMCL929	ORTHOMCL972	ORTHOMCL932	ORTHOMCL937	ORTHOMCL933	ORTHOMCL929	ORTHOMCL926	ORTHOMCL933	ORTHOMCL930
ORTHOMCL927	ORTHOMCL961	ORTHOMCL930	ORTHOMCL973	ORTHOMCL933	ORTHOMCL938	ORTHOMCL934	ORTHOMCL930	ORTHOMCL927	ORTHOMCL934	ORTHOMCL931
ORTHOMCL928	ORTHOMCL962	ORTHOMCL931	ORTHOMCL974	ORTHOMCL934	ORTHOMCL939	ORTHOMCL935	ORTHOMCL931	ORTHOMCL928	ORTHOMCL935	ORTHOMCL932
ORTHOMCL929	ORTHOMCL963	ORTHOMCL932	ORTHOMCL975	ORTHOMCL935	ORTHOMCL940	ORTHOMCL936	ORTHOMCL932	ORTHOMCL929	ORTHOMCL936	ORTHOMCL933
ORTHOMCL930	ORTHOMCL964	ORTHOMCL933	ORTHOMCL976	ORTHOMCL936	ORTHOMCL941	ORTHOMCL937	ORTHOMCL933	ORTHOMCL930	ORTHOMCL937	ORTHOMCL934
ORTHOMCL931	ORTHOMCL965	ORTHOMCL934	ORTHOMCL977	ORTHOMCL937	ORTHOMCL942	ORTHOMCL938	ORTHOMCL934	ORTHOMCL931	ORTHOMCL938	ORTHOMCL935
ORTHOMCL932	ORTHOMCL966	ORTHOMCL935	ORTHOMCL978	ORTHOMCL938	ORTHOMCL943	ORTHOMCL939	ORTHOMCL935	ORTHOMCL932	ORTHOMCL939	ORTHOMCL936
ORTHOMCL933	ORTHOMCL967	ORTHOMCL936	ORTHOMCL980	ORTHOMCL939	ORTHOMCL944	ORTHOMCL940	ORTHOMCL936	ORTHOMCL933	ORTHOMCL940	ORTHOMCL937
ORTHOMCL934	ORTHOMCL968	ORTHOMCL937	ORTHOMCL981	ORTHOMCL940	ORTHOMCL945	ORTHOMCL941	ORTHOMCL937	ORTHOMCL934	ORTHOMCL941	ORTHOMCL938
ORTHOMCL935	ORTHOMCL969	ORTHOMCL938	ORTHOMCL982	ORTHOMCL941	ORTHOMCL946	ORTHOMCL942	ORTHOMCL938	ORTHOMCL935	ORTHOMCL942	ORTHOMCL939
ORTHOMCL936	ORTHOMCL970	ORTHOMCL939	ORTHOMCL983	ORTHOMCL942	ORTHOMCL947	ORTHOMCL943	ORTHOMCL939	ORTHOMCL936	ORTHOMCL943	ORTHOMCL940
ORTHOMCL937	ORTHOMCL971	ORTHOMCL940	ORTHOMCL984	ORTHOMCL943	ORTHOMCL948	ORTHOMCL944	ORTHOMCL940	ORTHOMCL937	ORTHOMCL944	ORTHOMCL941
ORTHOMCL938	ORTHOMCL972	ORTHOMCL941	ORTHOMCL985	ORTHOMCL944	ORTHOMCL949	ORTHOMCL945	ORTHOMCL941	ORTHOMCL938	ORTHOMCL945	ORTHOMCL942
ORTHOMCL939	ORTHOMCL973	ORTHOMCL942	ORTHOMCL987	ORTHOMCL945	ORTHOMCL950	ORTHOMCL946	ORTHOMCL942	ORTHOMCL939	ORTHOMCL946	ORTHOMCL943
ORTHOMCL940	ORTHOMCL974	ORTHOMCL943	ORTHOMCL988	ORTHOMCL946	ORTHOMCL951	ORTHOMCL947	ORTHOMCL943	ORTHOMCL940	ORTHOMCL947	ORTHOMCL944
ORTHOMCL941	ORTHOMCL975	ORTHOMCL944	ORTHOMCL989	ORTHOMCL947	ORTHOMCL952	ORTHOMCL948	ORTHOMCL944	ORTHOMCL942	ORTHOMCL948	ORTHOMCL945
ORTHOMCL942	ORTHOMCL976	ORTHOMCL945	ORTHOMCL990	ORTHOMCL948	ORTHOMCL953	ORTHOMCL949	ORTHOMCL945	ORTHOMCL943	ORTHOMCL949	ORTHOMCL946
ORTHOMCL943	ORTHOMCL977	ORTHOMCL946	ORTHOMCL991	ORTHOMCL949	ORTHOMCL954	ORTHOMCL950	ORTHOMCL946	ORTHOMCL944	ORTHOMCL950	ORTHOMCL947
ORTHOMCL944	ORTHOMCL978	ORTHOMCL947	ORTHOMCL993	ORTHOMCL950	ORTHOMCL955	ORTHOMCL951	ORTHOMCL947	ORTHOMCL945	ORTHOMCL951	ORTHOMCL948
ORTHOMCL945	ORTHOMCL980	ORTHOMCL948	ORTHOMCL994	ORTHOMCL951	ORTHOMCL956	ORTHOMCL952	ORTHOMCL948	ORTHOMCL946	ORTHOMCL952	ORTHOMCL949
ORTHOMCL946	ORTHOMCL981	ORTHOMCL949	ORTHOMCL995	ORTHOMCL952	ORTHOMCL957	ORTHOMCL953	ORTHOMCL949	ORTHOMCL947	ORTHOMCL953	ORTHOMCL950
ORTHOMCL947	ORTHOMCL983	ORTHOMCL950	ORTHOMCL996	ORTHOMCL953	ORTHOMCL958	ORTHOMCL954	ORTHOMCL950	ORTHOMCL948	ORTHOMCL954	ORTHOMCL951
ORTHOMCL948	ORTHOMCL984	ORTHOMCL951	ORTHOMCL997	ORTHOMCL954	ORTHOMCL959	ORTHOMCL955	ORTHOMCL951	ORTHOMCL949	ORTHOMCL955	ORTHOMCL952
ORTHOMCL949	ORTHOMCL985	ORTHOMCL952	ORTHOMCL998	ORTHOMCL955	ORTHOMCL960	ORTHOMCL956	ORTHOMCL952	ORTHOMCL950	ORTHOMCL956	ORTHOMCL953
ORTHOMCL950	ORTHOMCL987	ORTHOMCL953	ORTHOMCL999	ORTHOMCL956	ORTHOMCL961	ORTHOMCL957	ORTHOMCL953	ORTHOMCL951	ORTHOMCL957	ORTHOMCL954
ORTHOMCL951	ORTHOMCL988	ORTHOMCL954	ORTHOMCL1000	ORTHOMCL957	ORTHOMCL962	ORTHOMCL958	ORTHOMCL954	ORTHOMCL952	ORTHOMCL958	ORTHOMCL955
ORTHOMCL952	ORTHOMCL989	ORTHOMCL955	ORTHOMCL1003	ORTHOMCL958	ORTHOMCL963	ORTHOMCL959	ORTHOMCL955	ORTHOMCL953	ORTHOMCL959	ORTHOMCL956
ORTHOMCL953	ORTHOMCL990	ORTHOMCL956	ORTHOMCL1004	ORTHOMCL959	ORTHOMCL964	ORTHOMCL960	ORTHOMCL956	ORTHOMCL954	ORTHOMCL960	ORTHOMCL957
ORTHOMCL954	ORTHOMCL991	ORTHOMCL957	ORTHOMCL1005	ORTHOMCL960	ORTHOMCL965	ORTHOMCL961	ORTHOMCL957	ORTHOMCL955	ORTHOMCL961	ORTHOMCL958
ORTHOMCL955	ORTHOMCL992	ORTHOMCL958	ORTHOMCL1006	ORTHOMCL961	ORTHOMCL966	ORTHOMCL962	ORTHOMCL958	ORTHOMCL956	ORTHOMCL962	ORTHOMCL959
ORTHOMCL956	ORTHOMCL993	ORTHOMCL959	ORTHOMCL1007	ORTHOMCL962	ORTHOMCL967	ORTHOMCL963	ORTHOMCL959	ORTHOMCL957	ORTHOMCL963	ORTHOMCL960
ORTHOMCL957	ORTHOMCL994	ORTHOMCL960	ORTHOMCL1008	ORTHOMCL963	ORTHOMCL968	ORTHOMCL964	ORTHOMCL960	ORTHOMCL958	ORTHOMCL964	ORTHOMCL961
ORTHOMCL958	ORTHOMCL995	ORTHOMCL961	ORTHOMCL1009	ORTHOMCL964	ORTHOMCL969	ORTHOMCL965	ORTHOMCL961	ORTHOMCL959	ORTHOMCL965	ORTHOMCL962
ORTHOMCL959	ORTHOMCL996	ORTHOMCL962	ORTHOMCL1010	ORTHOMCL965	ORTHOMCL971	ORTHOMCL966	ORTHOMCL962	ORTHOMCL960	ORTHOMCL966	ORTHOMCL963
ORTHOMCL960	ORTHOMCL997	ORTHOMCL963	ORTHOMCL1011	ORTHOMCL966	ORTHOMCL972	ORTHOMCL967	ORTHOMCL963	ORTHOMCL961	ORTHOMCL967	ORTHOMCL964
ORTHOMCL961	ORTHOMCL998	ORTHOMCL964	ORTHOMCL1012	ORTHOMCL967	ORTHOMCL973	ORTHOMCL968	ORTHOMCL964	ORTHOMCL962	ORTHOMCL968	ORTHOMCL965
ORTHOMCL962	ORTHOMCL999	ORTHOMCL965	ORTHOMCL1013	ORTHOMCL968	ORTHOMCL974	ORTHOMCL969	ORTHOMCL965	ORTHOMCL963	ORTHOMCL969	ORTHOMCL966
ORTHOMCL963	ORTHOMCL1000	ORTHOMCL966	ORTHOMCL1014	ORTHOMCL969	ORTHOMCL975	ORTHOMCL970	ORTHOMCL966	ORTHOMCL964	ORTHOMCL971	ORTHOMCL967
ORTHOMCL964	ORTHOMCL1002	ORTHOMCL967	ORTHOMCL1015	ORTHOMCL970	ORTHOMCL976	ORTHOMCL971	ORTHOMCL967	ORTHOMCL965	ORTHOMCL972	ORTHOMCL968
ORTHOMCL965	ORTHOMCL1003	ORTHOMCL968	ORTHOMCL1016	ORTHOMCL971	ORTHOMCL977	ORTHOMCL972	ORTHOMCL968	ORTHOMCL966	ORTHOMCL973	ORTHOMCL969
ORTHOMCL966	ORTHOMCL1004	ORTHOMCL969	ORTHOMCL1017	ORTHOMCL972	ORTHOMCL978	ORTHOMCL973	ORTHOMCL969	ORTHOMCL967	ORTHOMCL974	ORTHOMCL970
ORTHOMCL967	ORTHOMCL1005	ORTHOMCL970	ORTHOMCL1018	ORTHOMCL973	ORTHOMCL979	ORTHOMCL974	ORTHOMCL970	ORTHOMCL968	ORTHOMCL975	ORTHOMCL971
ORTHOMCL968	ORTHOMCL1006	ORTHOMCL971	ORTHOMCL1019	ORTHOMCL974	ORTHOMCL980	ORTHOMCL975	ORTHOMCL971	ORTHOMCL969	ORTHOMCL976	ORTHOMCL972
ORTHOMCL969	ORTHOMCL1007	ORTHOMCL972	ORTHOMCL1020	ORTHOMCL975	ORTHOMCL981	ORTHOMCL976	ORTHOMCL972	ORTHOMCL970	ORTHOMCL977	ORTHOMCL973
ORTHOMCL970	ORTHOMCL1008	ORTHOMCL973	ORTHOMCL1021	ORTHOMCL976	ORTHOMCL982	ORTHOMCL977	ORTHOMCL973	ORTHOMCL971	ORTHOMCL978	ORTHOMCL974
ORTHOMCL971	ORTHOMCL1009	ORTHOMCL974	ORTHOMCL1022	ORTHOMCL977	ORTHOMCL983	ORTHOMCL978	ORTHOMCL974	ORTHOMCL972	ORTHOMCL979	ORTHOMCL975
ORTHOMCL972	ORTHOMCL1010	ORTHOMCL976	ORTHOMCL1023	ORTHOMCL978	ORTHOMCL984	ORTHOMCL979	ORTHOMCL975	ORTHOMCL973	ORTHOMCL980	ORTHOMCL976
ORTHOMCL973	ORTHOMCL1011	ORTHOMCL977	ORTHOMCL1024	ORTHOMCL979	ORTHOMCL985	ORTHOMCL980	ORTHOMCL976	ORTHOMCL974	ORTHOMCL981	ORTHOMCL977
ORTHOMCL974	ORTHOMCL1012	ORTHOMCL978	ORTHOMCL1025	ORTHOMCL981	ORTHOMCL986	ORTHOMCL981	ORTHOMCL977	ORTHOMCL975	ORTHOMCL982	ORTHOMCL978
ORTHOMCL975	ORTHOMCL1013	ORTHOMCL979	ORTHOMCL1026	ORTHOMCL982	ORTHOMCL987	ORTHOMCL982	ORTHOMCL978	ORTHOMCL976	ORTHOMCL983	ORTHOMCL979
ORTHOMCL976	ORTHOMCL1014	ORTHOMCL980	ORTHOMCL1027	ORTHOMCL983	ORTHOMCL988	ORTHOMCL983	ORTHOMCL979	ORTHOMCL977	ORTHOMCL984	ORTHOMCL980
ORTHOMCL977	ORTHOMCL1015	ORTHOMCL981	ORTHOMCL1028	ORTHOMCL984	ORTHOMCL989	ORTHOMCL984	ORTHOMCL980	ORTHOMCL978	ORTHOMCL985	ORTHOMCL981
ORTHOMCL978	ORTHOMCL1016	ORTHOMCL982	ORTHOMCL1029	ORTHOMCL985	ORTHOMCL990	ORTHOMCL985	ORTHOMCL981	ORTHOMCL979	ORTHOMCL986	ORTHOMCL982
ORTHOMCL979	ORTHOMCL1017	ORTHOMCL983	ORTHOMCL1030	ORTHOMCL986	ORTHOMCL991	ORTHOMCL986	ORTHOMCL982	ORTHOMCL980	ORTHOMCL987	ORTHOMCL983
ORTHOMCL980	ORTHOMCL1019	ORTHOMCL984	ORTHOMCL1031	ORTHOMCL987	ORTHOMCL992	ORTHOMCL987	ORTHOMCL983	ORTHOMCL981	ORTHOMCL988	ORTHOMCL984
ORTHOMCL981	ORTHOMCL1020	ORTHOMCL985	ORTHOMCL1032	ORTHOMCL988	ORTHOMCL993	ORTHOMCL988	ORTHOMCL984	ORTHOMCL982	ORTHOMCL989	ORTHOMCL985
ORTHOMCL982	ORTHOMCL1021	ORTHOMCL986	ORTHOMCL1033	ORTHOMCL989	ORTHOMCL994	ORTHOMCL989	ORTHOMCL985	ORTHOMCL983	ORTHOMCL990	ORTHOMCL986
ORTHOMCL983	ORTHOMCL1022	ORTHOMCL987	ORTHOMCL1034	ORTHOMCL990	ORTHOMCL995	ORTHOMCL990	ORTHOMCL986	ORTHOMCL984	ORTHOMCL991	ORTHOMCL987
ORTHOMCL984	ORTHOMCL1023	ORTHOMCL988	ORTHOMCL1035	ORTHOMCL991	ORTHOMCL996	ORTHOMCL991	ORTHOMCL987	ORTHOMCL985	ORTHOMCL992	ORTHOMCL988
ORTHOMCL985	ORTHOMCL1024	ORTHOMCL989	ORTHOMCL1036	ORTHOMCL992	ORTHOMCL997	ORTHOMCL992	ORTHOMCL988	ORTHOMCL986	ORTHOMCL993	ORTHOMCL989
ORTHOMCL986	ORTHOMCL1025	ORTHOMCL990	ORTHOMCL1037	ORTHOMCL993	ORTHOMCL998	ORTHOMCL994	ORTHOMCL989	ORTHOMCL987	ORTHOMCL994	ORTHOMCL990
ORTHOMCL987	ORTHOMCL1026	ORTHOMCL991	ORTHOMCL1038	ORTHOMCL994	ORTHOMCL999	ORTHOMCL995	ORTHOMCL990	ORTHOMCL988	ORTHOMCL995	ORTHOMCL991
ORTHOMCL988	ORTHOMCL1027	ORTHOMCL992	ORTHOMCL1039	ORTHOMCL995	ORTHOMCL1000	ORTHOMCL996	ORTHOMCL991	ORTHOMCL989	ORTHOMCL996	ORTHOMCL993
ORTHOMCL990	ORTHOMCL1028	ORTHOMCL993	ORTHOMCL1040	ORTHOMCL996	ORTHOMCL1001	ORTHOMCL997	ORTHOMCL992	ORTHOMCL991	ORTHOMCL997	ORTHOMCL994
ORTHOMCL991	ORTHOMCL1029	ORTHOMCL994	ORTHOMCL1041	ORTHOMCL997	ORTHOMCL1002	ORTHOMCL998	ORTHOMCL993	ORTHOMCL992	ORTHOMCL998	ORTHOMCL995
ORTHOMCL992	ORTHOMCL1030	ORTHOMCL995	ORTHOMCL1042	ORTHOMCL998	ORTHOMCL1003	ORTHOMCL999	ORTHOMCL994	ORTHOMCL993	ORTHOMCL999	ORTHOMCL996
ORTHOMCL993	ORTHOMCL1031	ORTHOMCL996	ORTHOMCL1043	ORTHOMCL999	ORTHOMCL1004	ORTHOMCL1000	ORTHOMCL995	ORTHOMCL994	ORTHOMCL1000	ORTHOMCL997
ORTHOMCL994	ORTHOMCL1032	ORTHOMCL997	ORTHOMCL1044	ORTHOMCL1000	ORTHOMCL1005	ORTHOMCL1001	ORTHOMCL996	ORTHOMCL995	ORTHOMCL1001	ORTHOMCL998
ORTHOMCL995	ORTHOMCL1033	ORTHOMCL998	ORTHOMCL1045	ORTHOMCL1001	ORTHOMCL1006	ORTHOMCL1002	ORTHOMCL997	ORTHOMCL996	ORTHOMCL1002	ORTHOMCL999
ORTHOMCL996	ORTHOMCL1034	ORTHOMCL999	ORTHOMCL1047	ORTHOMCL1002	ORTHOMCL1007	ORTHOMCL1003	ORTHOMCL998	ORTHOMCL997	ORTHOMCL1003	ORTHOMCL1000
ORTHOMCL997	ORTHOMCL1035	ORTHOMCL1000	ORTHOMCL1048	ORTHOMCL1003	ORTHOMCL1008	ORTHOMCL1004	ORTHOMCL999	ORTHOMCL998	ORTHOMCL1004	ORTHOMCL1001
ORTHOMCL998	ORTHOMCL1036	ORTHOMCL1001	ORTHOMCL1049	ORTHOMCL1004	ORTHOMCL1009	ORTHOMCL1005	ORTHOMCL1000	ORTHOMCL999	ORTHOMCL1005	ORTHOMCL1002
ORTHOMCL999	ORTHOMCL1037	ORTHOMCL1002	ORTHOMCL1050	ORTHOMCL1005	ORTHOMCL1010	ORTHOMCL1006	ORTHOMCL1001	ORTHOMCL1000	ORTHOMCL1006	ORTHOMCL1003
ORTHOMCL1000	ORTHOMCL1038	ORTHOMCL1003	ORTHOMCL1051	ORTHOMCL1006	ORTHOMCL1011	ORTHOMCL1007	ORTHOMCL1002	ORTHOMCL1001	ORTHOMCL1007	ORTHOMCL1004
ORTHOMCL1001	ORTHOMCL1039	ORTHOMCL1004	ORTHOMCL1052	ORTHOMCL1007	ORTHOMCL1012	ORTHOMCL1008	ORTHOMCL1003	ORTHOMCL1002	ORTHOMCL1008	ORTHOMCL1005
ORTHOMCL1002	ORTHOMCL1040	ORTHOMCL1005	ORTHOMCL1053	ORTHOMCL1008	ORTHOMCL1013	ORTHOMCL1009	ORTHOMCL1004	ORTHOMCL1003	ORTHOMCL1009	ORTHOMCL1006
ORTHOMCL1003	ORTHOMCL1041	ORTHOMCL1006	ORTHOMCL1054	ORTHOMCL1009	ORTHOMCL1014	ORTHOMCL1010	ORTHOMCL1005	ORTHOMCL1004	ORTHOMCL1011	ORTHOMCL1007
ORTHOMCL1004	ORTHOMCL1042	ORTHOMCL1007	ORTHOMCL1055	ORTHOMCL1010	ORTHOMCL1015	ORTHOMCL1011	ORTHOMCL1006	ORTHOMCL1005	ORTHOMCL1012	ORTHOMCL1008
ORTHOMCL1005	ORTHOMCL1043	ORTHOMCL1008	ORTHOMCL1056	ORTHOMCL1011	ORTHOMCL1016	ORTHOMCL1012	ORTHOMCL1007	ORTHOMCL1006	ORTHOMCL1013	ORTHOMCL1009
ORTHOMCL1006	ORTHOMCL1044	ORTHOMCL1009	ORTHOMCL1057	ORTHOMCL1012	ORTHOMCL1017	ORTHOMCL1013	ORTHOMCL1008	ORTHOMCL1007	ORTHOMCL1014	ORTHOMCL1010
ORTHOMCL1007	ORTHOMCL1045	ORTHOMCL1010	ORTHOMCL1058	ORTHOMCL1013	ORTHOMCL1018	ORTHOMCL1014	ORTHOMCL1009	ORTHOMCL1008	ORTHOMCL1015	ORTHOMCL1011
ORTHOMCL1008	ORTHOMCL1046	ORTHOMCL1011	ORTHOMCL1059	ORTHOMCL1014	ORTHOMCL1019	ORTHOMCL1015	ORTHOMCL1011	ORTHOMCL1009	ORTHOMCL1016	ORTHOMCL1012
ORTHOMCL1009	ORTHOMCL1047	ORTHOMCL1012	ORTHOMCL1060	ORTHOMCL1015	ORTHOMCL1020	ORTHOMCL1016	ORTHOMCL1012	ORTHOMCL1011	ORTHOMCL1017	ORTHOMCL1013
ORTHOMCL1010	ORTHOMCL1048	ORTHOMCL1013	ORTHOMCL1061	ORTHOMCL1016	ORTHOMCL1021	ORTHOMCL1017	ORTHOMCL1013	ORTHOMCL1012	ORTHOMCL1018	ORTHOMCL1014
ORTHOMCL1011	ORTHOMCL1049	ORTHOMCL1014	ORTHOMCL1062	ORTHOMCL1017	ORTHOMCL1022	ORTHOMCL1018	ORTHOMCL1014	ORTHOMCL1013	ORTHOMCL1019	ORTHOMCL1015
ORTHOMCL1012	ORTHOMCL1050	ORTHOMCL1015	ORTHOMCL1063	ORTHOMCL1018	ORTHOMCL1023	ORTHOMCL1019	ORTHOMCL1015	ORTHOMCL1014	ORTHOMCL1020	ORTHOMCL1016
ORTHOMCL1013	ORTHOMCL1051	ORTHOMCL1016	ORTHOMCL1064	ORTHOMCL1019	ORTHOMCL1024	ORTHOMCL1020	ORTHOMCL1016	ORTHOMCL1015	ORTHOMCL1021	ORTHOMCL1017
ORTHOMCL1014	ORTHOMCL1052	ORTHOMCL1017	ORTHOMCL1065	ORTHOMCL1020	ORTHOMCL1025	ORTHOMCL1021	ORTHOMCL1017	ORTHOMCL1016	ORTHOMCL1022	ORTHOMCL1018
ORTHOMCL1015	ORTHOMCL1053	ORTHOMCL1018	ORTHOMCL1066	ORTHOMCL1021	ORTHOMCL1026	ORTHOMCL1022	ORTHOMCL1018	ORTHOMCL1017	ORTHOMCL1023	ORTHOMCL1019
ORTHOMCL1016	ORTHOMCL1054	ORTHOMCL1019	ORTHOMCL1067	ORTHOMCL1022	ORTHOMCL1027	ORTHOMCL1023	ORTHOMCL1019	ORTHOMCL1018	ORTHOMCL1024	ORTHOMCL1020
ORTHOMCL1017	ORTHOMCL1055	ORTHOMCL1020	ORTHOMCL1068	ORTHOMCL1023	ORTHOMCL1028	ORTHOMCL1024	ORTHOMCL1020	ORTHOMCL1019	ORTHOMCL1025	ORTHOMCL1021
ORTHOMCL1018	ORTHOMCL1056	ORTHOMCL1021	ORTHOMCL1069	ORTHOMCL1024	ORTHOMCL1029	ORTHOMCL1025	ORTHOMCL1021	ORTHOMCL1020	ORTHOMCL1026	ORTHOMCL1022
ORTHOMCL1019	ORTHOMCL1057	ORTHOMCL1022	ORTHOMCL1070	ORTHOMCL1025	ORTHOMCL1030	ORTHOMCL1026	ORTHOMCL1022	ORTHOMCL1021	ORTHOMCL1027	ORTHOMCL1023
ORTHOMCL1020	ORTHOMCL1058	ORTHOMCL1023	ORTHOMCL1071	ORTHOMCL1026	ORTHOMCL1031	ORTHOMCL1027	ORTHOMCL1023	ORTHOMCL1022	ORTHOMCL1028	ORTHOMCL1024
ORTHOMCL1021	ORTHOMCL1059	ORTHOMCL1024	ORTHOMCL1072	ORTHOMCL1027	ORTHOMCL1032	ORTHOMCL1028	ORTHOMCL1024	ORTHOMCL1023	ORTHOMCL1029	ORTHOMCL1025
ORTHOMCL1022	ORTHOMCL1060	ORTHOMCL1025	ORTHOMCL1073	ORTHOMCL1028	ORTHOMCL1033	ORTHOMCL1029	ORTHOMCL1025	ORTHOMCL1024	ORTHOMCL1030	ORTHOMCL1026
ORTHOMCL1023	ORTHOMCL1061	ORTHOMCL1026	ORTHOMCL1074	ORTHOMCL1029	ORTHOMCL1034	ORTHOMCL1030	ORTHOMCL1026	ORTHOMCL1025	ORTHOMCL1031	ORTHOMCL1027
ORTHOMCL1024	ORTHOMCL1062	ORTHOMCL1027	ORTHOMCL1075	ORTHOMCL1030	ORTHOMCL1035	ORTHOMCL1031	ORTHOMCL1027	ORTHOMCL1026	ORTHOMCL1032	ORTHOMCL1028
ORTHOMCL1025	ORTHOMCL1063	ORTHOMCL1028	ORTHOMCL1076	ORTHOMCL1031	ORTHOMCL1036	ORTHOMCL1032	ORTHOMCL1028	ORTHOMCL1027	ORTHOMCL1033	ORTHOMCL1029
ORTHOMCL1026	ORTHOMCL1064	ORTHOMCL1029	ORTHOMCL1077	ORTHOMCL1032	ORTHOMCL1037	ORTHOMCL1033	ORTHOMCL1029	ORTHOMCL1028	ORTHOMCL1034	ORTHOMCL1030
ORTHOMCL1027	ORTHOMCL1065	ORTHOMCL1030	ORTHOMCL1078	ORTHOMCL1033	ORTHOMCL1038	ORTHOMCL1034	ORTHOMCL1030	ORTHOMCL1029	ORTHOMCL1035	ORTHOMCL1031
ORTHOMCL1028	ORTHOMCL1066	ORTHOMCL1031	ORTHOMCL1079	ORTHOMCL1034	ORTHOMCL1039	ORTHOMCL1035	ORTHOMCL1031	ORTHOMCL1030	ORTHOMCL1036	ORTHOMCL1032
ORTHOMCL1029	ORTHOMCL1067	ORTHOMCL1032	ORTHOMCL1080	ORTHOMCL1035	ORTHOMCL1040	ORTHOMCL1036	ORTHOMCL1032	ORTHOMCL1031	ORTHOMCL1037	ORTHOMCL1033
ORTHOMCL1030	ORTHOMCL1068	ORTHOMCL1033	ORTHOMCL1081	ORTHOMCL1036	ORTHOMCL1041	ORTHOMCL1037	ORTHOMCL1033	ORTHOMCL1032	ORTHOMCL1038	ORTHOMCL1034
ORTHOMCL1031	ORTHOMCL1069	ORTHOMCL1034	ORTHOMCL1082	ORTHOMCL1037	ORTHOMCL1042	ORTHOMCL1038	ORTHOMCL1034	ORTHOMCL1033	ORTHOMCL1039	ORTHOMCL1035
ORTHOMCL1032	ORTHOMCL1070	ORTHOMCL1035	ORTHOMCL1083	ORTHOMCL1038	ORTHOMCL1043	ORTHOMCL1039	ORTHOMCL1036	ORTHOMCL1034	ORTHOMCL1040	ORTHOMCL1036
ORTHOMCL1033	ORTHOMCL1071	ORTHOMCL1036	ORTHOMCL1084	ORTHOMCL1039	ORTHOMCL1044	ORTHOMCL1040	ORTHOMCL1037	ORTHOMCL1036	ORTHOMCL1041	ORTHOMCL1037
ORTHOMCL1034	ORTHOMCL1072	ORTHOMCL1037	ORTHOMCL1085	ORTHOMCL1040	ORTHOMCL1045	ORTHOMCL1041	ORTHOMCL1038	ORTHOMCL1037	ORTHOMCL1042	ORTHOMCL1038
ORTHOMCL1035	ORTHOMCL1073	ORTHOMCL1038	ORTHOMCL1086	ORTHOMCL1041	ORTHOMCL1047	ORTHOMCL1042	ORTHOMCL1039	ORTHOMCL1038	ORTHOMCL1043	ORTHOMCL1039
ORTHOMCL1036	ORTHOMCL1074	ORTHOMCL1039	ORTHOMCL1087	ORTHOMCL1042	ORTHOMCL1048	ORTHOMCL1043	ORTHOMCL1040	ORTHOMCL1039	ORTHOMCL1044	ORTHOMCL1040
ORTHOMCL1037	ORTHOMCL1075	ORTHOMCL1040	ORTHOMCL1088	ORTHOMCL1043	ORTHOMCL1049	ORTHOMCL1044	ORTHOMCL1041	ORTHOMCL1040	ORTHOMCL1045	ORTHOMCL1041
ORTHOMCL1038	ORTHOMCL1076	ORTHOMCL1041	ORTHOMCL1089	ORTHOMCL1044	ORTHOMCL1050	ORTHOMCL1045	ORTHOMCL1042	ORTHOMCL1041	ORTHOMCL1046	ORTHOMCL1042
ORTHOMCL1039	ORTHOMCL1077	ORTHOMCL1042	ORTHOMCL1090	ORTHOMCL1045	ORTHOMCL1051	ORTHOMCL1047	ORTHOMCL1043	ORTHOMCL1042	ORTHOMCL1047	ORTHOMCL1043
ORTHOMCL1040	ORTHOMCL1079	ORTHOMCL1043	ORTHOMCL1091	ORTHOMCL1046	ORTHOMCL1052	ORTHOMCL1048	ORTHOMCL1044	ORTHOMCL1043	ORTHOMCL1048	ORTHOMCL1044
ORTHOMCL1041	ORTHOMCL1080	ORTHOMCL1044	ORTHOMCL1092	ORTHOMCL1047	ORTHOMCL1053	ORTHOMCL1049	ORTHOMCL1045	ORTHOMCL1044	ORTHOMCL1049	ORTHOMCL1045
ORTHOMCL1042	ORTHOMCL1081	ORTHOMCL1045	ORTHOMCL1093	ORTHOMCL1048	ORTHOMCL1054	ORTHOMCL1050	ORTHOMCL1046	ORTHOMCL1045	ORTHOMCL1050	ORTHOMCL1046
ORTHOMCL1043	ORTHOMCL1082	ORTHOMCL1046	ORTHOMCL1094	ORTHOMCL1049	ORTHOMCL1055	ORTHOMCL1051	ORTHOMCL1047	ORTHOMCL1046	ORTHOMCL1051	ORTHOMCL1047
ORTHOMCL1044	ORTHOMCL1083	ORTHOMCL1047	ORTHOMCL1095	ORTHOMCL1050	ORTHOMCL1056	ORTHOMCL1052	ORTHOMCL1048	ORTHOMCL1047	ORTHOMCL1052	ORTHOMCL1048
ORTHOMCL1045	ORTHOMCL1084	ORTHOMCL1048	ORTHOMCL1096	ORTHOMCL1051	ORTHOMCL1057	ORTHOMCL1053	ORTHOMCL1049	ORTHOMCL1048	ORTHOMCL1053	ORTHOMCL1049
ORTHOMCL1046	ORTHOMCL1085	ORTHOMCL1049	ORTHOMCL1098	ORTHOMCL1052	ORTHOMCL1058	ORTHOMCL1054	ORTHOMCL1050	ORTHOMCL1049	ORTHOMCL1054	ORTHOMCL1050
ORTHOMCL1047	ORTHOMCL1086	ORTHOMCL1050	ORTHOMCL1099	ORTHOMCL1053	ORTHOMCL1059	ORTHOMCL1055	ORTHOMCL1051	ORTHOMCL1050	ORTHOMCL1055	ORTHOMCL1051
ORTHOMCL1048	ORTHOMCL1087	ORTHOMCL1051	ORTHOMCL1100	ORTHOMCL1054	ORTHOMCL1060	ORTHOMCL1056	ORTHOMCL1052	ORTHOMCL1051	ORTHOMCL1056	ORTHOMCL1052
ORTHOMCL1049	ORTHOMCL1088	ORTHOMCL1052	ORTHOMCL1101	ORTHOMCL1055	ORTHOMCL1061	ORTHOMCL1057	ORTHOMCL1053	ORTHOMCL1052	ORTHOMCL1057	ORTHOMCL1053
ORTHOMCL1050	ORTHOMCL1089	ORTHOMCL1053	ORTHOMCL1102	ORTHOMCL1056	ORTHOMCL1062	ORTHOMCL1058	ORTHOMCL1054	ORTHOMCL1053	ORTHOMCL1058	ORTHOMCL1054
ORTHOMCL1051	ORTHOMCL1090	ORTHOMCL1054	ORTHOMCL1103	ORTHOMCL1057	ORTHOMCL1064	ORTHOMCL1059	ORTHOMCL1055	ORTHOMCL1054	ORTHOMCL1059	ORTHOMCL1055
ORTHOMCL1052	ORTHOMCL1091	ORTHOMCL1055	ORTHOMCL1104	ORTHOMCL1058	ORTHOMCL1065	ORTHOMCL1060	ORTHOMCL1056	ORTHOMCL1055	ORTHOMCL1060	ORTHOMCL1056
ORTHOMCL1053	ORTHOMCL1092	ORTHOMCL1056	ORTHOMCL1105	ORTHOMCL1059	ORTHOMCL1066	ORTHOMCL1061	ORTHOMCL1057	ORTHOMCL1056	ORTHOMCL1061	ORTHOMCL1057
ORTHOMCL1054	ORTHOMCL1093	ORTHOMCL1057	ORTHOMCL1106	ORTHOMCL1060	ORTHOMCL1067	ORTHOMCL1062	ORTHOMCL1058	ORTHOMCL1057	ORTHOMCL1062	ORTHOMCL1058
ORTHOMCL1055	ORTHOMCL1094	ORTHOMCL1058	ORTHOMCL1107	ORTHOMCL1062	ORTHOMCL1068	ORTHOMCL1063	ORTHOMCL1059	ORTHOMCL1058	ORTHOMCL1063	ORTHOMCL1059
ORTHOMCL1056	ORTHOMCL1095	ORTHOMCL1059	ORTHOMCL1108	ORTHOMCL1063	ORTHOMCL1069	ORTHOMCL1064	ORTHOMCL1060	ORTHOMCL1059	ORTHOMCL1064	ORTHOMCL1060
ORTHOMCL1057	ORTHOMCL1096	ORTHOMCL1060	ORTHOMCL1109	ORTHOMCL1064	ORTHOMCL1070	ORTHOMCL1065	ORTHOMCL1061	ORTHOMCL1060	ORTHOMCL1065	ORTHOMCL1061
ORTHOMCL1058	ORTHOMCL1097	ORTHOMCL1061	ORTHOMCL1110	ORTHOMCL1065	ORTHOMCL1071	ORTHOMCL1066	ORTHOMCL1062	ORTHOMCL1061	ORTHOMCL1066	ORTHOMCL1062
ORTHOMCL1059	ORTHOMCL1098	ORTHOMCL1062	ORTHOMCL1111	ORTHOMCL1066	ORTHOMCL1072	ORTHOMCL1067	ORTHOMCL1063	ORTHOMCL1062	ORTHOMCL1067	ORTHOMCL1063
ORTHOMCL1060	ORTHOMCL1099	ORTHOMCL1063	ORTHOMCL1112	ORTHOMCL1067	ORTHOMCL1073	ORTHOMCL1068	ORTHOMCL1064	ORTHOMCL1063	ORTHOMCL1068	ORTHOMCL1064
ORTHOMCL1061	ORTHOMCL1100	ORTHOMCL1064	ORTHOMCL1113	ORTHOMCL1068	ORTHOMCL1074	ORTHOMCL1069	ORTHOMCL1065	ORTHOMCL1064	ORTHOMCL1069	ORTHOMCL1065
ORTHOMCL1062	ORTHOMCL1101	ORTHOMCL1065	ORTHOMCL1114	ORTHOMCL1069	ORTHOMCL1075	ORTHOMCL1070	ORTHOMCL1066	ORTHOMCL1065	ORTHOMCL1070	ORTHOMCL1066
ORTHOMCL1063	ORTHOMCL1102	ORTHOMCL1066	ORTHOMCL1115	ORTHOMCL1070	ORTHOMCL1076	ORTHOMCL1071	ORTHOMCL1067	ORTHOMCL1066	ORTHOMCL1071	ORTHOMCL1067
ORTHOMCL1064	ORTHOMCL1103	ORTHOMCL1068	ORTHOMCL1116	ORTHOMCL1071	ORTHOMCL1077	ORTHOMCL1072	ORTHOMCL1068	ORTHOMCL1067	ORTHOMCL1072	ORTHOMCL1068
ORTHOMCL1065	ORTHOMCL1104	ORTHOMCL1069	ORTHOMCL1117	ORTHOMCL1072	ORTHOMCL1078	ORTHOMCL1073	ORTHOMCL1069	ORTHOMCL1068	ORTHOMCL1073	ORTHOMCL1069
ORTHOMCL1066	ORTHOMCL1105	ORTHOMCL1070	ORTHOMCL1118	ORTHOMCL1073	ORTHOMCL1079	ORTHOMCL1074	ORTHOMCL1070	ORTHOMCL1069	ORTHOMCL1074	ORTHOMCL1070
ORTHOMCL1067	ORTHOMCL1106	ORTHOMCL1071	ORTHOMCL1119	ORTHOMCL1074	ORTHOMCL1080	ORTHOMCL1075	ORTHOMCL1071	ORTHOMCL1070	ORTHOMCL1075	ORTHOMCL1071
ORTHOMCL1068	ORTHOMCL1107	ORTHOMCL1072	ORTHOMCL1120	ORTHOMCL1075	ORTHOMCL1081	ORTHOMCL1076	ORTHOMCL1072	ORTHOMCL1071	ORTHOMCL1076	ORTHOMCL1072
ORTHOMCL1069	ORTHOMCL1108	ORTHOMCL1073	ORTHOMCL1121	ORTHOMCL1076	ORTHOMCL1082	ORTHOMCL1077	ORTHOMCL1073	ORTHOMCL1072	ORTHOMCL1077	ORTHOMCL1073
ORTHOMCL1070	ORTHOMCL1109	ORTHOMCL1074	ORTHOMCL1122	ORTHOMCL1077	ORTHOMCL1083	ORTHOMCL1078	ORTHOMCL1074	ORTHOMCL1073	ORTHOMCL1078	ORTHOMCL1074
ORTHOMCL1071	ORTHOMCL1110	ORTHOMCL1075	ORTHOMCL1123	ORTHOMCL1078	ORTHOMCL1084	ORTHOMCL1079	ORTHOMCL1075	ORTHOMCL1074	ORTHOMCL1079	ORTHOMCL1075
ORTHOMCL1072	ORTHOMCL1111	ORTHOMCL1076	ORTHOMCL1124	ORTHOMCL1079	ORTHOMCL1085	ORTHOMCL1080	ORTHOMCL1076	ORTHOMCL1075	ORTHOMCL1080	ORTHOMCL1076
ORTHOMCL1073	ORTHOMCL1112	ORTHOMCL1077	ORTHOMCL1125	ORTHOMCL1080	ORTHOMCL1086	ORTHOMCL1081	ORTHOMCL1077	ORTHOMCL1076	ORTHOMCL1081	ORTHOMCL1077
ORTHOMCL1074	ORTHOMCL1114	ORTHOMCL1078	ORTHOMCL1126	ORTHOMCL1081	ORTHOMCL1087	ORTHOMCL1082	ORTHOMCL1078	ORTHOMCL1077	ORTHOMCL1082	ORTHOMCL1078
ORTHOMCL1075	ORTHOMCL1115	ORTHOMCL1079	ORTHOMCL1127	ORTHOMCL1082	ORTHOMCL1088	ORTHOMCL1083	ORTHOMCL1079	ORTHOMCL1078	ORTHOMCL1083	ORTHOMCL1079
ORTHOMCL1076	ORTHOMCL1116	ORTHOMCL1080	ORTHOMCL1128	ORTHOMCL1083	ORTHOMCL1089	ORTHOMCL1084	ORTHOMCL1080	ORTHOMCL1079	ORTHOMCL1084	ORTHOMCL1080
ORTHOMCL1077	ORTHOMCL1117	ORTHOMCL1081	ORTHOMCL1129	ORTHOMCL1084	ORTHOMCL1090	ORTHOMCL1085	ORTHOMCL1081	ORTHOMCL1080	ORTHOMCL1085	ORTHOMCL1081
ORTHOMCL1078	ORTHOMCL1118	ORTHOMCL1082	ORTHOMCL1130	ORTHOMCL1085	ORTHOMCL1091	ORTHOMCL1086	ORTHOMCL1082	ORTHOMCL1081	ORTHOMCL1086	ORTHOMCL1082
ORTHOMCL1079	ORTHOMCL1119	ORTHOMCL1083	ORTHOMCL1131	ORTHOMCL1086	ORTHOMCL1092	ORTHOMCL1087	ORTHOMCL1083	ORTHOMCL1082	ORTHOMCL1087	ORTHOMCL1083
ORTHOMCL1080	ORTHOMCL1120	ORTHOMCL1084	ORTHOMCL1132	ORTHOMCL1087	ORTHOMCL1093	ORTHOMCL1088	ORTHOMCL1084	ORTHOMCL1083	ORTHOMCL1088	ORTHOMCL1084
ORTHOMCL1081	ORTHOMCL1121	ORTHOMCL1085	ORTHOMCL1133	ORTHOMCL1088	ORTHOMCL1094	ORTHOMCL1089	ORTHOMCL1085	ORTHOMCL1084	ORTHOMCL1089	ORTHOMCL1085
ORTHOMCL1082	ORTHOMCL1122	ORTHOMCL1086	ORTHOMCL1134	ORTHOMCL1089	ORTHOMCL1095	ORTHOMCL1090	ORTHOMCL1086	ORTHOMCL1085	ORTHOMCL1090	ORTHOMCL1086
ORTHOMCL1083	ORTHOMCL1123	ORTHOMCL1087	ORTHOMCL1135	ORTHOMCL1090	ORTHOMCL1096	ORTHOMCL1091	ORTHOMCL1087	ORTHOMCL1086	ORTHOMCL1091	ORTHOMCL1088
ORTHOMCL1084	ORTHOMCL1124	ORTHOMCL1088	ORTHOMCL1136	ORTHOMCL1091	ORTHOMCL1098	ORTHOMCL1092	ORTHOMCL1088	ORTHOMCL1088	ORTHOMCL1092	ORTHOMCL1089
ORTHOMCL1085	ORTHOMCL1125	ORTHOMCL1089	ORTHOMCL1137	ORTHOMCL1092	ORTHOMCL1099	ORTHOMCL1093	ORTHOMCL1089	ORTHOMCL1089	ORTHOMCL1093	ORTHOMCL1090
ORTHOMCL1086	ORTHOMCL1126	ORTHOMCL1090	ORTHOMCL1138	ORTHOMCL1093	ORTHOMCL1100	ORTHOMCL1094	ORTHOMCL1090	ORTHOMCL1090	ORTHOMCL1094	ORTHOMCL1091
ORTHOMCL1087	ORTHOMCL1127	ORTHOMCL1091	ORTHOMCL1139	ORTHOMCL1094	ORTHOMCL1101	ORTHOMCL1095	ORTHOMCL1091	ORTHOMCL1091	ORTHOMCL1095	ORTHOMCL1092
ORTHOMCL1088	ORTHOMCL1128	ORTHOMCL1092	ORTHOMCL1140	ORTHOMCL1095	ORTHOMCL1102	ORTHOMCL1096	ORTHOMCL1092	ORTHOMCL1092	ORTHOMCL1096	ORTHOMCL1093
ORTHOMCL1089	ORTHOMCL1129	ORTHOMCL1093	ORTHOMCL1141	ORTHOMCL1096	ORTHOMCL1103	ORTHOMCL1097	ORTHOMCL1093	ORTHOMCL1093	ORTHOMCL1097	ORTHOMCL1094
ORTHOMCL1090	ORTHOMCL1130	ORTHOMCL1094	ORTHOMCL1142	ORTHOMCL1097	ORTHOMCL1104	ORTHOMCL1098	ORTHOMCL1094	ORTHOMCL1094	ORTHOMCL1098	ORTHOMCL1095
ORTHOMCL1091	ORTHOMCL1131	ORTHOMCL1095	ORTHOMCL1143	ORTHOMCL1098	ORTHOMCL1105	ORTHOMCL1099	ORTHOMCL1095	ORTHOMCL1095	ORTHOMCL1099	ORTHOMCL1096
ORTHOMCL1092	ORTHOMCL1132	ORTHOMCL1096	ORTHOMCL1144	ORTHOMCL1099	ORTHOMCL1106	ORTHOMCL1100	ORTHOMCL1096	ORTHOMCL1096	ORTHOMCL1100	ORTHOMCL1097
ORTHOMCL1093	ORTHOMCL1133	ORTHOMCL1097	ORTHOMCL1145	ORTHOMCL1100	ORTHOMCL1107	ORTHOMCL1101	ORTHOMCL1097	ORTHOMCL1097	ORTHOMCL1101	ORTHOMCL1098
ORTHOMCL1094	ORTHOMCL1134	ORTHOMCL1098	ORTHOMCL1146	ORTHOMCL1101	ORTHOMCL1108	ORTHOMCL1102	ORTHOMCL1098	ORTHOMCL1098	ORTHOMCL1102	ORTHOMCL1099
ORTHOMCL1095	ORTHOMCL1135	ORTHOMCL1099	ORTHOMCL1147	ORTHOMCL1102	ORTHOMCL1109	ORTHOMCL1103	ORTHOMCL1099	ORTHOMCL1099	ORTHOMCL1103	ORTHOMCL1100
ORTHOMCL1096	ORTHOMCL1136	ORTHOMCL1100	ORTHOMCL1148	ORTHOMCL1103	ORTHOMCL1110	ORTHOMCL1104	ORTHOMCL1100	ORTHOMCL1100	ORTHOMCL1105	ORTHOMCL1101
ORTHOMCL1097	ORTHOMCL1137	ORTHOMCL1101	ORTHOMCL1149	ORTHOMCL1104	ORTHOMCL1111	ORTHOMCL1105	ORTHOMCL1101	ORTHOMCL1102	ORTHOMCL1106	ORTHOMCL1102
ORTHOMCL1098	ORTHOMCL1138	ORTHOMCL1102	ORTHOMCL1150	ORTHOMCL1105	ORTHOMCL1113	ORTHOMCL1106	ORTHOMCL1102	ORTHOMCL1103	ORTHOMCL1107	ORTHOMCL1103
ORTHOMCL1099	ORTHOMCL1139	ORTHOMCL1103	ORTHOMCL1151	ORTHOMCL1106	ORTHOMCL1114	ORTHOMCL1107	ORTHOMCL1103	ORTHOMCL1104	ORTHOMCL1108	ORTHOMCL1104
ORTHOMCL1100	ORTHOMCL1140	ORTHOMCL1104	ORTHOMCL1152	ORTHOMCL1107	ORTHOMCL1115	ORTHOMCL1108	ORTHOMCL1104	ORTHOMCL1105	ORTHOMCL1109	ORTHOMCL1105
ORTHOMCL1101	ORTHOMCL1141	ORTHOMCL1105	ORTHOMCL1153	ORTHOMCL1108	ORTHOMCL1116	ORTHOMCL1109	ORTHOMCL1105	ORTHOMCL1106	ORTHOMCL1110	ORTHOMCL1106
ORTHOMCL1102	ORTHOMCL1142	ORTHOMCL1106	ORTHOMCL1154	ORTHOMCL1109	ORTHOMCL1117	ORTHOMCL1110	ORTHOMCL1106	ORTHOMCL1107	ORTHOMCL1111	ORTHOMCL1107
ORTHOMCL1103	ORTHOMCL1143	ORTHOMCL1107	ORTHOMCL1155	ORTHOMCL1110	ORTHOMCL1118	ORTHOMCL1111	ORTHOMCL1107	ORTHOMCL1108	ORTHOMCL1112	ORTHOMCL1108
ORTHOMCL1104	ORTHOMCL1144	ORTHOMCL1108	ORTHOMCL1156	ORTHOMCL1111	ORTHOMCL1119	ORTHOMCL1112	ORTHOMCL1108	ORTHOMCL1109	ORTHOMCL1113	ORTHOMCL1109
ORTHOMCL1105	ORTHOMCL1145	ORTHOMCL1109	ORTHOMCL1157	ORTHOMCL1112	ORTHOMCL1120	ORTHOMCL1113	ORTHOMCL1109	ORTHOMCL1110	ORTHOMCL1114	ORTHOMCL1110
ORTHOMCL1106	ORTHOMCL1146	ORTHOMCL1110	ORTHOMCL1158	ORTHOMCL1113	ORTHOMCL1121	ORTHOMCL1114	ORTHOMCL1110	ORTHOMCL1111	ORTHOMCL1115	ORTHOMCL1111
ORTHOMCL1107	ORTHOMCL1147	ORTHOMCL1111	ORTHOMCL1159	ORTHOMCL1114	ORTHOMCL1122	ORTHOMCL1115	ORTHOMCL1111	ORTHOMCL1112	ORTHOMCL1116	ORTHOMCL1112
ORTHOMCL1108	ORTHOMCL1148	ORTHOMCL1112	ORTHOMCL1160	ORTHOMCL1115	ORTHOMCL1123	ORTHOMCL1116	ORTHOMCL1112	ORTHOMCL1113	ORTHOMCL1117	ORTHOMCL1113
ORTHOMCL1109	ORTHOMCL1149	ORTHOMCL1113	ORTHOMCL1161	ORTHOMCL1116	ORTHOMCL1124	ORTHOMCL1117	ORTHOMCL1114	ORTHOMCL1114	ORTHOMCL1118	ORTHOMCL1114
ORTHOMCL1110	ORTHOMCL1150	ORTHOMCL1114	ORTHOMCL1162	ORTHOMCL1117	ORTHOMCL1125	ORTHOMCL1118	ORTHOMCL1115	ORTHOMCL1115	ORTHOMCL1119	ORTHOMCL1115
ORTHOMCL1111	ORTHOMCL1151	ORTHOMCL1115	ORTHOMCL1163	ORTHOMCL1118	ORTHOMCL1126	ORTHOMCL1119	ORTHOMCL1116	ORTHOMCL1116	ORTHOMCL1120	ORTHOMCL1116
ORTHOMCL1112	ORTHOMCL1153	ORTHOMCL1116	ORTHOMCL1164	ORTHOMCL1119	ORTHOMCL1127	ORTHOMCL1120	ORTHOMCL1117	ORTHOMCL1117	ORTHOMCL1121	ORTHOMCL1117
ORTHOMCL1113	ORTHOMCL1154	ORTHOMCL1117	ORTHOMCL1165	ORTHOMCL1120	ORTHOMCL1128	ORTHOMCL1121	ORTHOMCL1118	ORTHOMCL1118	ORTHOMCL1122	ORTHOMCL1118
ORTHOMCL1114	ORTHOMCL1155	ORTHOMCL1118	ORTHOMCL1166	ORTHOMCL1121	ORTHOMCL1129	ORTHOMCL1122	ORTHOMCL1119	ORTHOMCL1119	ORTHOMCL1123	ORTHOMCL1119
ORTHOMCL1115	ORTHOMCL1156	ORTHOMCL1119	ORTHOMCL1167	ORTHOMCL1122	ORTHOMCL1130	ORTHOMCL1123	ORTHOMCL1120	ORTHOMCL1120	ORTHOMCL1124	ORTHOMCL1120
ORTHOMCL1116	ORTHOMCL1157	ORTHOMCL1120	ORTHOMCL1168	ORTHOMCL1123	ORTHOMCL1131	ORTHOMCL1124	ORTHOMCL1121	ORTHOMCL1121	ORTHOMCL1125	ORTHOMCL1121
ORTHOMCL1117	ORTHOMCL1158	ORTHOMCL1121	ORTHOMCL1169	ORTHOMCL1124	ORTHOMCL1132	ORTHOMCL1125	ORTHOMCL1122	ORTHOMCL1122	ORTHOMCL1126	ORTHOMCL1122
ORTHOMCL1118	ORTHOMCL1159	ORTHOMCL1122	ORTHOMCL1170	ORTHOMCL1125	ORTHOMCL1133	ORTHOMCL1126	ORTHOMCL1123	ORTHOMCL1123	ORTHOMCL1127	ORTHOMCL1123
ORTHOMCL1119	ORTHOMCL1160	ORTHOMCL1123	ORTHOMCL1171	ORTHOMCL1126	ORTHOMCL1134	ORTHOMCL1127	ORTHOMCL1124	ORTHOMCL1124	ORTHOMCL1128	ORTHOMCL1124
ORTHOMCL1120	ORTHOMCL1161	ORTHOMCL1124	ORTHOMCL1172	ORTHOMCL1127	ORTHOMCL1135	ORTHOMCL1128	ORTHOMCL1125	ORTHOMCL1125	ORTHOMCL1129	ORTHOMCL1125
ORTHOMCL1121	ORTHOMCL1162	ORTHOMCL1125	ORTHOMCL1173	ORTHOMCL1128	ORTHOMCL1136	ORTHOMCL1129	ORTHOMCL1126	ORTHOMCL1126	ORTHOMCL1130	ORTHOMCL1126
ORTHOMCL1122	ORTHOMCL1164	ORTHOMCL1126	ORTHOMCL1174	ORTHOMCL1129	ORTHOMCL1137	ORTHOMCL1130	ORTHOMCL1128	ORTHOMCL1127	ORTHOMCL1131	ORTHOMCL1127
ORTHOMCL1123	ORTHOMCL1165	ORTHOMCL1127	ORTHOMCL1175	ORTHOMCL1130	ORTHOMCL1138	ORTHOMCL1131	ORTHOMCL1129	ORTHOMCL1128	ORTHOMCL1132	ORTHOMCL1128
ORTHOMCL1124	ORTHOMCL1166	ORTHOMCL1128	ORTHOMCL1176	ORTHOMCL1131	ORTHOMCL1139	ORTHOMCL1132	ORTHOMCL1130	ORTHOMCL1129	ORTHOMCL1133	ORTHOMCL1129
ORTHOMCL1125	ORTHOMCL1167	ORTHOMCL1129	ORTHOMCL1177	ORTHOMCL1132	ORTHOMCL1140	ORTHOMCL1133	ORTHOMCL1131	ORTHOMCL1130	ORTHOMCL1134	ORTHOMCL1130
ORTHOMCL1126	ORTHOMCL1168	ORTHOMCL1130	ORTHOMCL1178	ORTHOMCL1133	ORTHOMCL1141	ORTHOMCL1134	ORTHOMCL1132	ORTHOMCL1131	ORTHOMCL1135	ORTHOMCL1131
ORTHOMCL1127	ORTHOMCL1169	ORTHOMCL1131	ORTHOMCL1179	ORTHOMCL1134	ORTHOMCL1142	ORTHOMCL1135	ORTHOMCL1133	ORTHOMCL1132	ORTHOMCL1136	ORTHOMCL1132
ORTHOMCL1128	ORTHOMCL1171	ORTHOMCL1132	ORTHOMCL1180	ORTHOMCL1135	ORTHOMCL1143	ORTHOMCL1136	ORTHOMCL1134	ORTHOMCL1133	ORTHOMCL1137	ORTHOMCL1133
ORTHOMCL1129	ORTHOMCL1172	ORTHOMCL1133	ORTHOMCL1181	ORTHOMCL1136	ORTHOMCL1144	ORTHOMCL1137	ORTHOMCL1135	ORTHOMCL1134	ORTHOMCL1138	ORTHOMCL1134
ORTHOMCL1130	ORTHOMCL1173	ORTHOMCL1134	ORTHOMCL1182	ORTHOMCL1137	ORTHOMCL1145	ORTHOMCL1138	ORTHOMCL1136	ORTHOMCL1135	ORTHOMCL1139	ORTHOMCL1135
ORTHOMCL1131	ORTHOMCL1174	ORTHOMCL1135	ORTHOMCL1183	ORTHOMCL1138	ORTHOMCL1146	ORTHOMCL1139	ORTHOMCL1137	ORTHOMCL1136	ORTHOMCL1140	ORTHOMCL1136
ORTHOMCL1132	ORTHOMCL1175	ORTHOMCL1136	ORTHOMCL1184	ORTHOMCL1139	ORTHOMCL1147	ORTHOMCL1140	ORTHOMCL1138	ORTHOMCL1137	ORTHOMCL1141	ORTHOMCL1137
ORTHOMCL1133	ORTHOMCL1176	ORTHOMCL1137	ORTHOMCL1186	ORTHOMCL1140	ORTHOMCL1148	ORTHOMCL1141	ORTHOMCL1139	ORTHOMCL1138	ORTHOMCL1142	ORTHOMCL1138
ORTHOMCL1134	ORTHOMCL1177	ORTHOMCL1138	ORTHOMCL1187	ORTHOMCL1141	ORTHOMCL1149	ORTHOMCL1142	ORTHOMCL1140	ORTHOMCL1139	ORTHOMCL1143	ORTHOMCL1139
ORTHOMCL1135	ORTHOMCL1178	ORTHOMCL1139	ORTHOMCL1188	ORTHOMCL1142	ORTHOMCL1150	ORTHOMCL1143	ORTHOMCL1141	ORTHOMCL1140	ORTHOMCL1144	ORTHOMCL1140
ORTHOMCL1136	ORTHOMCL1179	ORTHOMCL1140	ORTHOMCL1189	ORTHOMCL1143	ORTHOMCL1151	ORTHOMCL1144	ORTHOMCL1142	ORTHOMCL1141	ORTHOMCL1145	ORTHOMCL1141
ORTHOMCL1137	ORTHOMCL1180	ORTHOMCL1141	ORTHOMCL1190	ORTHOMCL1144	ORTHOMCL1152	ORTHOMCL1145	ORTHOMCL1143	ORTHOMCL1142	ORTHOMCL1146	ORTHOMCL1142
ORTHOMCL1138	ORTHOMCL1181	ORTHOMCL1142	ORTHOMCL1191	ORTHOMCL1145	ORTHOMCL1153	ORTHOMCL1146	ORTHOMCL1144	ORTHOMCL1143	ORTHOMCL1148	ORTHOMCL1143
ORTHOMCL1139	ORTHOMCL1182	ORTHOMCL1143	ORTHOMCL1192	ORTHOMCL1146	ORTHOMCL1154	ORTHOMCL1147	ORTHOMCL1145	ORTHOMCL1144	ORTHOMCL1149	ORTHOMCL1144
ORTHOMCL1140	ORTHOMCL1183	ORTHOMCL1144	ORTHOMCL1193	ORTHOMCL1147	ORTHOMCL1155	ORTHOMCL1148	ORTHOMCL1146	ORTHOMCL1145	ORTHOMCL1150	ORTHOMCL1145
ORTHOMCL1141	ORTHOMCL1184	ORTHOMCL1145	ORTHOMCL1194	ORTHOMCL1148	ORTHOMCL1156	ORTHOMCL1149	ORTHOMCL1147	ORTHOMCL1146	ORTHOMCL1151	ORTHOMCL1146
ORTHOMCL1142	ORTHOMCL1185	ORTHOMCL1146	ORTHOMCL1195	ORTHOMCL1149	ORTHOMCL1157	ORTHOMCL1150	ORTHOMCL1148	ORTHOMCL1147	ORTHOMCL1152	ORTHOMCL1147
ORTHOMCL1143	ORTHOMCL1186	ORTHOMCL1147	ORTHOMCL1196	ORTHOMCL1150	ORTHOMCL1158	ORTHOMCL1151	ORTHOMCL1149	ORTHOMCL1148	ORTHOMCL1153	ORTHOMCL1148
ORTHOMCL1144	ORTHOMCL1187	ORTHOMCL1148	ORTHOMCL1197	ORTHOMCL1151	ORTHOMCL1159	ORTHOMCL1152	ORTHOMCL1150	ORTHOMCL1149	ORTHOMCL1154	ORTHOMCL1149
ORTHOMCL1145	ORTHOMCL1188	ORTHOMCL1149	ORTHOMCL1198	ORTHOMCL1152	ORTHOMCL1160	ORTHOMCL1153	ORTHOMCL1151	ORTHOMCL1150	ORTHOMCL1155	ORTHOMCL1150
ORTHOMCL1146	ORTHOMCL1189	ORTHOMCL1150	ORTHOMCL1200	ORTHOMCL1153	ORTHOMCL1161	ORTHOMCL1155	ORTHOMCL1152	ORTHOMCL1151	ORTHOMCL1156	ORTHOMCL1151
ORTHOMCL1147	ORTHOMCL1190	ORTHOMCL1151	ORTHOMCL1201	ORTHOMCL1154	ORTHOMCL1162	ORTHOMCL1156	ORTHOMCL1153	ORTHOMCL1152	ORTHOMCL1157	ORTHOMCL1152
ORTHOMCL1148	ORTHOMCL1191	ORTHOMCL1152	ORTHOMCL1202	ORTHOMCL1155	ORTHOMCL1163	ORTHOMCL1157	ORTHOMCL1154	ORTHOMCL1153	ORTHOMCL1158	ORTHOMCL1153
ORTHOMCL1149	ORTHOMCL1193	ORTHOMCL1153	ORTHOMCL1203	ORTHOMCL1156	ORTHOMCL1164	ORTHOMCL1158	ORTHOMCL1155	ORTHOMCL1154	ORTHOMCL1159	ORTHOMCL1154
ORTHOMCL1150	ORTHOMCL1194	ORTHOMCL1154	ORTHOMCL1204	ORTHOMCL1157	ORTHOMCL1165	ORTHOMCL1159	ORTHOMCL1156	ORTHOMCL1155	ORTHOMCL1160	ORTHOMCL1155
ORTHOMCL1151	ORTHOMCL1195	ORTHOMCL1155	ORTHOMCL1205	ORTHOMCL1158	ORTHOMCL1166	ORTHOMCL1160	ORTHOMCL1157	ORTHOMCL1156	ORTHOMCL1161	ORTHOMCL1156
ORTHOMCL1152	ORTHOMCL1196	ORTHOMCL1156	ORTHOMCL1206	ORTHOMCL1159	ORTHOMCL1167	ORTHOMCL1161	ORTHOMCL1158	ORTHOMCL1157	ORTHOMCL1162	ORTHOMCL1157
ORTHOMCL1153	ORTHOMCL1197	ORTHOMCL1157	ORTHOMCL1207	ORTHOMCL1160	ORTHOMCL1168	ORTHOMCL1162	ORTHOMCL1159	ORTHOMCL1158	ORTHOMCL1163	ORTHOMCL1158
ORTHOMCL1154	ORTHOMCL1198	ORTHOMCL1158	ORTHOMCL1208	ORTHOMCL1161	ORTHOMCL1169	ORTHOMCL1163	ORTHOMCL1160	ORTHOMCL1159	ORTHOMCL1164	ORTHOMCL1159
ORTHOMCL1155	ORTHOMCL1199	ORTHOMCL1159	ORTHOMCL1209	ORTHOMCL1162	ORTHOMCL1170	ORTHOMCL1164	ORTHOMCL1161	ORTHOMCL1160	ORTHOMCL1165	ORTHOMCL1160
ORTHOMCL1156	ORTHOMCL1200	ORTHOMCL1160	ORTHOMCL1211	ORTHOMCL1163	ORTHOMCL1171	ORTHOMCL1165	ORTHOMCL1162	ORTHOMCL1161	ORTHOMCL1166	ORTHOMCL1161
ORTHOMCL1157	ORTHOMCL1201	ORTHOMCL1161	ORTHOMCL1212	ORTHOMCL1164	ORTHOMCL1172	ORTHOMCL1166	ORTHOMCL1163	ORTHOMCL1162	ORTHOMCL1167	ORTHOMCL1162
ORTHOMCL1158	ORTHOMCL1202	ORTHOMCL1162	ORTHOMCL1213	ORTHOMCL1165	ORTHOMCL1173	ORTHOMCL1167	ORTHOMCL1164	ORTHOMCL1163	ORTHOMCL1168	ORTHOMCL1163
ORTHOMCL1159	ORTHOMCL1203	ORTHOMCL1163	ORTHOMCL1214	ORTHOMCL1166	ORTHOMCL1174	ORTHOMCL1168	ORTHOMCL1165	ORTHOMCL1164	ORTHOMCL1169	ORTHOMCL1164
ORTHOMCL1160	ORTHOMCL1204	ORTHOMCL1164	ORTHOMCL1215	ORTHOMCL1167	ORTHOMCL1175	ORTHOMCL1169	ORTHOMCL1166	ORTHOMCL1165	ORTHOMCL1170	ORTHOMCL1165
ORTHOMCL1161	ORTHOMCL1205	ORTHOMCL1165	ORTHOMCL1216	ORTHOMCL1168	ORTHOMCL1176	ORTHOMCL1170	ORTHOMCL1167	ORTHOMCL1166	ORTHOMCL1171	ORTHOMCL1166
ORTHOMCL1162	ORTHOMCL1206	ORTHOMCL1166	ORTHOMCL1218	ORTHOMCL1169	ORTHOMCL1177	ORTHOMCL1171	ORTHOMCL1168	ORTHOMCL1167	ORTHOMCL1172	ORTHOMCL1167
ORTHOMCL1163	ORTHOMCL1207	ORTHOMCL1167	ORTHOMCL1219	ORTHOMCL1170	ORTHOMCL1178	ORTHOMCL1172	ORTHOMCL1169	ORTHOMCL1168	ORTHOMCL1173	ORTHOMCL1168
ORTHOMCL1164	ORTHOMCL1208	ORTHOMCL1168	ORTHOMCL1220	ORTHOMCL1171	ORTHOMCL1179	ORTHOMCL1173	ORTHOMCL1170	ORTHOMCL1169	ORTHOMCL1175	ORTHOMCL1169
ORTHOMCL1165	ORTHOMCL1209	ORTHOMCL1169	ORTHOMCL1221	ORTHOMCL1172	ORTHOMCL1180	ORTHOMCL1174	ORTHOMCL1171	ORTHOMCL1170	ORTHOMCL1176	ORTHOMCL1170
ORTHOMCL1166	ORTHOMCL1210	ORTHOMCL1170	ORTHOMCL1222	ORTHOMCL1173	ORTHOMCL1181	ORTHOMCL1175	ORTHOMCL1172	ORTHOMCL1171	ORTHOMCL1177	ORTHOMCL1171
ORTHOMCL1167	ORTHOMCL1211	ORTHOMCL1171	ORTHOMCL1223	ORTHOMCL1174	ORTHOMCL1182	ORTHOMCL1176	ORTHOMCL1173	ORTHOMCL1172	ORTHOMCL1178	ORTHOMCL1172
ORTHOMCL1168	ORTHOMCL1212	ORTHOMCL1172	ORTHOMCL1224	ORTHOMCL1175	ORTHOMCL1183	ORTHOMCL1177	ORTHOMCL1174	ORTHOMCL1173	ORTHOMCL1179	ORTHOMCL1173
ORTHOMCL1169	ORTHOMCL1213	ORTHOMCL1173	ORTHOMCL1225	ORTHOMCL1176	ORTHOMCL1184	ORTHOMCL1178	ORTHOMCL1175	ORTHOMCL1175	ORTHOMCL1180	ORTHOMCL1174
ORTHOMCL1170	ORTHOMCL1214	ORTHOMCL1174	ORTHOMCL1226	ORTHOMCL1177	ORTHOMCL1185	ORTHOMCL1179	ORTHOMCL1176	ORTHOMCL1176	ORTHOMCL1181	ORTHOMCL1175
ORTHOMCL1171	ORTHOMCL1215	ORTHOMCL1175	ORTHOMCL1227	ORTHOMCL1178	ORTHOMCL1186	ORTHOMCL1180	ORTHOMCL1177	ORTHOMCL1177	ORTHOMCL1182	ORTHOMCL1176
ORTHOMCL1172	ORTHOMCL1216	ORTHOMCL1176	ORTHOMCL1228	ORTHOMCL1179	ORTHOMCL1187	ORTHOMCL1181	ORTHOMCL1178	ORTHOMCL1178	ORTHOMCL1183	ORTHOMCL1177
ORTHOMCL1173	ORTHOMCL1217	ORTHOMCL1177	ORTHOMCL1229	ORTHOMCL1180	ORTHOMCL1188	ORTHOMCL1182	ORTHOMCL1179	ORTHOMCL1179	ORTHOMCL1184	ORTHOMCL1178
ORTHOMCL1174	ORTHOMCL1218	ORTHOMCL1178	ORTHOMCL1230	ORTHOMCL1181	ORTHOMCL1189	ORTHOMCL1183	ORTHOMCL1180	ORTHOMCL1180	ORTHOMCL1185	ORTHOMCL1179
ORTHOMCL1175	ORTHOMCL1219	ORTHOMCL1179	ORTHOMCL1231	ORTHOMCL1182	ORTHOMCL1190	ORTHOMCL1184	ORTHOMCL1181	ORTHOMCL1181	ORTHOMCL1186	ORTHOMCL1180
ORTHOMCL1176	ORTHOMCL1220	ORTHOMCL1180	ORTHOMCL1233	ORTHOMCL1184	ORTHOMCL1191	ORTHOMCL1186	ORTHOMCL1182	ORTHOMCL1182	ORTHOMCL1187	ORTHOMCL1181
ORTHOMCL1177	ORTHOMCL1221	ORTHOMCL1181	ORTHOMCL1234	ORTHOMCL1185	ORTHOMCL1193	ORTHOMCL1187	ORTHOMCL1183	ORTHOMCL1183	ORTHOMCL1188	ORTHOMCL1182
ORTHOMCL1178	ORTHOMCL1223	ORTHOMCL1182	ORTHOMCL1235	ORTHOMCL1186	ORTHOMCL1194	ORTHOMCL1188	ORTHOMCL1184	ORTHOMCL1184	ORTHOMCL1189	ORTHOMCL1183
ORTHOMCL1179	ORTHOMCL1224	ORTHOMCL1183	ORTHOMCL1236	ORTHOMCL1187	ORTHOMCL1195	ORTHOMCL1189	ORTHOMCL1185	ORTHOMCL1185	ORTHOMCL1190	ORTHOMCL1184
ORTHOMCL1180	ORTHOMCL1225	ORTHOMCL1184	ORTHOMCL1237	ORTHOMCL1188	ORTHOMCL1196	ORTHOMCL1190	ORTHOMCL1186	ORTHOMCL1186	ORTHOMCL1191	ORTHOMCL1185
ORTHOMCL1181	ORTHOMCL1226	ORTHOMCL1185	ORTHOMCL1238	ORTHOMCL1189	ORTHOMCL1197	ORTHOMCL1191	ORTHOMCL1187	ORTHOMCL1187	ORTHOMCL1192	ORTHOMCL1186
ORTHOMCL1182	ORTHOMCL1227	ORTHOMCL1186	ORTHOMCL1239	ORTHOMCL1190	ORTHOMCL1198	ORTHOMCL1192	ORTHOMCL1188	ORTHOMCL1188	ORTHOMCL1193	ORTHOMCL1187
ORTHOMCL1183	ORTHOMCL1228	ORTHOMCL1187	ORTHOMCL1240	ORTHOMCL1191	ORTHOMCL1199	ORTHOMCL1193	ORTHOMCL1189	ORTHOMCL1189	ORTHOMCL1194	ORTHOMCL1188
ORTHOMCL1184	ORTHOMCL1229	ORTHOMCL1188	ORTHOMCL1241	ORTHOMCL1192	ORTHOMCL1200	ORTHOMCL1194	ORTHOMCL1190	ORTHOMCL1190	ORTHOMCL1195	ORTHOMCL1189
ORTHOMCL1185	ORTHOMCL1231	ORTHOMCL1189	ORTHOMCL1242	ORTHOMCL1193	ORTHOMCL1201	ORTHOMCL1195	ORTHOMCL1191	ORTHOMCL1191	ORTHOMCL1196	ORTHOMCL1190
ORTHOMCL1186	ORTHOMCL1233	ORTHOMCL1190	ORTHOMCL1243	ORTHOMCL1194	ORTHOMCL1202	ORTHOMCL1196	ORTHOMCL1192	ORTHOMCL1192	ORTHOMCL1197	ORTHOMCL1191
ORTHOMCL1187	ORTHOMCL1234	ORTHOMCL1191	ORTHOMCL1244	ORTHOMCL1195	ORTHOMCL1203	ORTHOMCL1197	ORTHOMCL1193	ORTHOMCL1193	ORTHOMCL1198	ORTHOMCL1192
ORTHOMCL1188	ORTHOMCL1235	ORTHOMCL1192	ORTHOMCL1245	ORTHOMCL1196	ORTHOMCL1204	ORTHOMCL1198	ORTHOMCL1194	ORTHOMCL1194	ORTHOMCL1199	ORTHOMCL1193
ORTHOMCL1189	ORTHOMCL1236	ORTHOMCL1193	ORTHOMCL1246	ORTHOMCL1197	ORTHOMCL1205	ORTHOMCL1199	ORTHOMCL1195	ORTHOMCL1195	ORTHOMCL1200	ORTHOMCL1194
ORTHOMCL1190	ORTHOMCL1237	ORTHOMCL1194	ORTHOMCL1247	ORTHOMCL1198	ORTHOMCL1206	ORTHOMCL1200	ORTHOMCL1196	ORTHOMCL1196	ORTHOMCL1201	ORTHOMCL1195
ORTHOMCL1191	ORTHOMCL1238	ORTHOMCL1195	ORTHOMCL1248	ORTHOMCL1199	ORTHOMCL1207	ORTHOMCL1201	ORTHOMCL1197	ORTHOMCL1197	ORTHOMCL1202	ORTHOMCL1196
ORTHOMCL1193	ORTHOMCL1239	ORTHOMCL1196	ORTHOMCL1249	ORTHOMCL1200	ORTHOMCL1208	ORTHOMCL1202	ORTHOMCL1198	ORTHOMCL1198	ORTHOMCL1203	ORTHOMCL1197
ORTHOMCL1194	ORTHOMCL1240	ORTHOMCL1197	ORTHOMCL1250	ORTHOMCL1201	ORTHOMCL1209	ORTHOMCL1203	ORTHOMCL1200	ORTHOMCL1199	ORTHOMCL1204	ORTHOMCL1198
ORTHOMCL1195	ORTHOMCL1241	ORTHOMCL1198	ORTHOMCL1251	ORTHOMCL1202	ORTHOMCL1210	ORTHOMCL1204	ORTHOMCL1201	ORTHOMCL1200	ORTHOMCL1205	ORTHOMCL1200
ORTHOMCL1196	ORTHOMCL1242	ORTHOMCL1199	ORTHOMCL1252	ORTHOMCL1203	ORTHOMCL1211	ORTHOMCL1205	ORTHOMCL1202	ORTHOMCL1201	ORTHOMCL1206	ORTHOMCL1201
ORTHOMCL1197	ORTHOMCL1243	ORTHOMCL1200	ORTHOMCL1253	ORTHOMCL1204	ORTHOMCL1212	ORTHOMCL1206	ORTHOMCL1203	ORTHOMCL1202	ORTHOMCL1207	ORTHOMCL1202
ORTHOMCL1198	ORTHOMCL1244	ORTHOMCL1201	ORTHOMCL1254	ORTHOMCL1205	ORTHOMCL1213	ORTHOMCL1207	ORTHOMCL1204	ORTHOMCL1203	ORTHOMCL1208	ORTHOMCL1203
ORTHOMCL1199	ORTHOMCL1245	ORTHOMCL1202	ORTHOMCL1255	ORTHOMCL1206	ORTHOMCL1214	ORTHOMCL1208	ORTHOMCL1205	ORTHOMCL1204	ORTHOMCL1209	ORTHOMCL1204
ORTHOMCL1200	ORTHOMCL1246	ORTHOMCL1203	ORTHOMCL1256	ORTHOMCL1207	ORTHOMCL1215	ORTHOMCL1209	ORTHOMCL1206	ORTHOMCL1205	ORTHOMCL1210	ORTHOMCL1205
ORTHOMCL1201	ORTHOMCL1247	ORTHOMCL1204	ORTHOMCL1257	ORTHOMCL1208	ORTHOMCL1216	ORTHOMCL1210	ORTHOMCL1207	ORTHOMCL1206	ORTHOMCL1211	ORTHOMCL1206
ORTHOMCL1202	ORTHOMCL1248	ORTHOMCL1205	ORTHOMCL1258	ORTHOMCL1209	ORTHOMCL1217	ORTHOMCL1211	ORTHOMCL1208	ORTHOMCL1207	ORTHOMCL1212	ORTHOMCL1207
ORTHOMCL1203	ORTHOMCL1249	ORTHOMCL1206	ORTHOMCL1259	ORTHOMCL1210	ORTHOMCL1218	ORTHOMCL1212	ORTHOMCL1209	ORTHOMCL1208	ORTHOMCL1213	ORTHOMCL1208
ORTHOMCL1204	ORTHOMCL1250	ORTHOMCL1207	ORTHOMCL1260	ORTHOMCL1211	ORTHOMCL1219	ORTHOMCL1213	ORTHOMCL1210	ORTHOMCL1209	ORTHOMCL1214	ORTHOMCL1209
ORTHOMCL1205	ORTHOMCL1251	ORTHOMCL1208	ORTHOMCL1261	ORTHOMCL1212	ORTHOMCL1220	ORTHOMCL1214	ORTHOMCL1211	ORTHOMCL1210	ORTHOMCL1215	ORTHOMCL1210
ORTHOMCL1206	ORTHOMCL1252	ORTHOMCL1209	ORTHOMCL1262	ORTHOMCL1213	ORTHOMCL1221	ORTHOMCL1215	ORTHOMCL1212	ORTHOMCL1211	ORTHOMCL1216	ORTHOMCL1211
ORTHOMCL1207	ORTHOMCL1254	ORTHOMCL1210	ORTHOMCL1263	ORTHOMCL1214	ORTHOMCL1222	ORTHOMCL1216	ORTHOMCL1213	ORTHOMCL1212	ORTHOMCL1217	ORTHOMCL1212
ORTHOMCL1208	ORTHOMCL1256	ORTHOMCL1211	ORTHOMCL1264	ORTHOMCL1215	ORTHOMCL1223	ORTHOMCL1217	ORTHOMCL1214	ORTHOMCL1213	ORTHOMCL1218	ORTHOMCL1213
ORTHOMCL1209	ORTHOMCL1257	ORTHOMCL1212	ORTHOMCL1265	ORTHOMCL1216	ORTHOMCL1224	ORTHOMCL1218	ORTHOMCL1215	ORTHOMCL1214	ORTHOMCL1219	ORTHOMCL1214
ORTHOMCL1210	ORTHOMCL1258	ORTHOMCL1213	ORTHOMCL1266	ORTHOMCL1217	ORTHOMCL1225	ORTHOMCL1219	ORTHOMCL1216	ORTHOMCL1215	ORTHOMCL1220	ORTHOMCL1215
ORTHOMCL1211	ORTHOMCL1259	ORTHOMCL1214	ORTHOMCL1268	ORTHOMCL1218	ORTHOMCL1226	ORTHOMCL1220	ORTHOMCL1217	ORTHOMCL1216	ORTHOMCL1221	ORTHOMCL1216
ORTHOMCL1212	ORTHOMCL1260	ORTHOMCL1215	ORTHOMCL1269	ORTHOMCL1219	ORTHOMCL1227	ORTHOMCL1221	ORTHOMCL1218	ORTHOMCL1217	ORTHOMCL1223	ORTHOMCL1217
ORTHOMCL1213	ORTHOMCL1261	ORTHOMCL1216	ORTHOMCL1270	ORTHOMCL1220	ORTHOMCL1228	ORTHOMCL1222	ORTHOMCL1219	ORTHOMCL1218	ORTHOMCL1224	ORTHOMCL1218
ORTHOMCL1214	ORTHOMCL1262	ORTHOMCL1217	ORTHOMCL1271	ORTHOMCL1221	ORTHOMCL1230	ORTHOMCL1223	ORTHOMCL1220	ORTHOMCL1219	ORTHOMCL1225	ORTHOMCL1219
ORTHOMCL1215	ORTHOMCL1263	ORTHOMCL1218	ORTHOMCL1272	ORTHOMCL1222	ORTHOMCL1231	ORTHOMCL1224	ORTHOMCL1221	ORTHOMCL1220	ORTHOMCL1226	ORTHOMCL1220
ORTHOMCL1216	ORTHOMCL1264	ORTHOMCL1219	ORTHOMCL1273	ORTHOMCL1223	ORTHOMCL1232	ORTHOMCL1225	ORTHOMCL1222	ORTHOMCL1221	ORTHOMCL1227	ORTHOMCL1221
ORTHOMCL1217	ORTHOMCL1265	ORTHOMCL1220	ORTHOMCL1274	ORTHOMCL1224	ORTHOMCL1233	ORTHOMCL1226	ORTHOMCL1223	ORTHOMCL1222	ORTHOMCL1228	ORTHOMCL1222
ORTHOMCL1218	ORTHOMCL1266	ORTHOMCL1221	ORTHOMCL1275	ORTHOMCL1225	ORTHOMCL1234	ORTHOMCL1227	ORTHOMCL1224	ORTHOMCL1223	ORTHOMCL1229	ORTHOMCL1223
ORTHOMCL1219	ORTHOMCL1267	ORTHOMCL1222	ORTHOMCL1276	ORTHOMCL1226	ORTHOMCL1235	ORTHOMCL1228	ORTHOMCL1225	ORTHOMCL1224	ORTHOMCL1230	ORTHOMCL1225
ORTHOMCL1220	ORTHOMCL1268	ORTHOMCL1223	ORTHOMCL1277	ORTHOMCL1227	ORTHOMCL1236	ORTHOMCL1229	ORTHOMCL1226	ORTHOMCL1225	ORTHOMCL1231	ORTHOMCL1226
ORTHOMCL1221	ORTHOMCL1269	ORTHOMCL1224	ORTHOMCL1278	ORTHOMCL1228	ORTHOMCL1237	ORTHOMCL1230	ORTHOMCL1227	ORTHOMCL1226	ORTHOMCL1232	ORTHOMCL1227
ORTHOMCL1222	ORTHOMCL1270	ORTHOMCL1225	ORTHOMCL1279	ORTHOMCL1229	ORTHOMCL1238	ORTHOMCL1231	ORTHOMCL1228	ORTHOMCL1227	ORTHOMCL1233	ORTHOMCL1228
ORTHOMCL1223	ORTHOMCL1271	ORTHOMCL1226	ORTHOMCL1280	ORTHOMCL1230	ORTHOMCL1239	ORTHOMCL1232	ORTHOMCL1229	ORTHOMCL1228	ORTHOMCL1234	ORTHOMCL1229
ORTHOMCL1224	ORTHOMCL1272	ORTHOMCL1227	ORTHOMCL1281	ORTHOMCL1231	ORTHOMCL1240	ORTHOMCL1233	ORTHOMCL1230	ORTHOMCL1229	ORTHOMCL1235	ORTHOMCL1230
ORTHOMCL1225	ORTHOMCL1273	ORTHOMCL1228	ORTHOMCL1282	ORTHOMCL1232	ORTHOMCL1241	ORTHOMCL1234	ORTHOMCL1231	ORTHOMCL1230	ORTHOMCL1236	ORTHOMCL1231
ORTHOMCL1226	ORTHOMCL1274	ORTHOMCL1229	ORTHOMCL1283	ORTHOMCL1233	ORTHOMCL1242	ORTHOMCL1235	ORTHOMCL1232	ORTHOMCL1231	ORTHOMCL1237	ORTHOMCL1232
ORTHOMCL1227	ORTHOMCL1275	ORTHOMCL1230	ORTHOMCL1284	ORTHOMCL1234	ORTHOMCL1243	ORTHOMCL1236	ORTHOMCL1233	ORTHOMCL1232	ORTHOMCL1238	ORTHOMCL1233
ORTHOMCL1228	ORTHOMCL1276	ORTHOMCL1231	ORTHOMCL1285	ORTHOMCL1235	ORTHOMCL1244	ORTHOMCL1237	ORTHOMCL1234	ORTHOMCL1233	ORTHOMCL1239	ORTHOMCL1234
ORTHOMCL1229	ORTHOMCL1277	ORTHOMCL1232	ORTHOMCL1286	ORTHOMCL1236	ORTHOMCL1245	ORTHOMCL1238	ORTHOMCL1235	ORTHOMCL1234	ORTHOMCL1240	ORTHOMCL1235
ORTHOMCL1230	ORTHOMCL1278	ORTHOMCL1233	ORTHOMCL1287	ORTHOMCL1237	ORTHOMCL1246	ORTHOMCL1239	ORTHOMCL1236	ORTHOMCL1235	ORTHOMCL1241	ORTHOMCL1236
ORTHOMCL1231	ORTHOMCL1279	ORTHOMCL1234	ORTHOMCL1288	ORTHOMCL1238	ORTHOMCL1247	ORTHOMCL1240	ORTHOMCL1237	ORTHOMCL1237	ORTHOMCL1242	ORTHOMCL1237
ORTHOMCL1232	ORTHOMCL1280	ORTHOMCL1235	ORTHOMCL1289	ORTHOMCL1239	ORTHOMCL1248	ORTHOMCL1241	ORTHOMCL1238	ORTHOMCL1238	ORTHOMCL1243	ORTHOMCL1238
ORTHOMCL1233	ORTHOMCL1281	ORTHOMCL1236	ORTHOMCL1290	ORTHOMCL1240	ORTHOMCL1249	ORTHOMCL1242	ORTHOMCL1239	ORTHOMCL1239	ORTHOMCL1244	ORTHOMCL1239
ORTHOMCL1234	ORTHOMCL1282	ORTHOMCL1237	ORTHOMCL1291	ORTHOMCL1241	ORTHOMCL1250	ORTHOMCL1243	ORTHOMCL1240	ORTHOMCL1240	ORTHOMCL1245	ORTHOMCL1240
ORTHOMCL1235	ORTHOMCL1283	ORTHOMCL1238	ORTHOMCL1293	ORTHOMCL1242	ORTHOMCL1251	ORTHOMCL1244	ORTHOMCL1241	ORTHOMCL1241	ORTHOMCL1246	ORTHOMCL1241
ORTHOMCL1236	ORTHOMCL1284	ORTHOMCL1239	ORTHOMCL1295	ORTHOMCL1243	ORTHOMCL1252	ORTHOMCL1245	ORTHOMCL1242	ORTHOMCL1242	ORTHOMCL1247	ORTHOMCL1242
ORTHOMCL1237	ORTHOMCL1285	ORTHOMCL1240	ORTHOMCL1296	ORTHOMCL1244	ORTHOMCL1253	ORTHOMCL1246	ORTHOMCL1243	ORTHOMCL1243	ORTHOMCL1248	ORTHOMCL1243
ORTHOMCL1238	ORTHOMCL1286	ORTHOMCL1241	ORTHOMCL1297	ORTHOMCL1245	ORTHOMCL1254	ORTHOMCL1247	ORTHOMCL1244	ORTHOMCL1244	ORTHOMCL1249	ORTHOMCL1244
ORTHOMCL1239	ORTHOMCL1287	ORTHOMCL1242	ORTHOMCL1298	ORTHOMCL1246	ORTHOMCL1255	ORTHOMCL1248	ORTHOMCL1245	ORTHOMCL1245	ORTHOMCL1250	ORTHOMCL1245
ORTHOMCL1240	ORTHOMCL1288	ORTHOMCL1243	ORTHOMCL1299	ORTHOMCL1247	ORTHOMCL1256	ORTHOMCL1249	ORTHOMCL1246	ORTHOMCL1246	ORTHOMCL1251	ORTHOMCL1246
ORTHOMCL1241	ORTHOMCL1289	ORTHOMCL1244	ORTHOMCL1300	ORTHOMCL1248	ORTHOMCL1257	ORTHOMCL1250	ORTHOMCL1247	ORTHOMCL1247	ORTHOMCL1253	ORTHOMCL1247
ORTHOMCL1242	ORTHOMCL1290	ORTHOMCL1245	ORTHOMCL1301	ORTHOMCL1249	ORTHOMCL1258	ORTHOMCL1251	ORTHOMCL1248	ORTHOMCL1248	ORTHOMCL1254	ORTHOMCL1248
ORTHOMCL1243	ORTHOMCL1291	ORTHOMCL1246	ORTHOMCL1302	ORTHOMCL1250	ORTHOMCL1259	ORTHOMCL1252	ORTHOMCL1249	ORTHOMCL1249	ORTHOMCL1255	ORTHOMCL1249
ORTHOMCL1244	ORTHOMCL1292	ORTHOMCL1247	ORTHOMCL1303	ORTHOMCL1251	ORTHOMCL1260	ORTHOMCL1253	ORTHOMCL1250	ORTHOMCL1250	ORTHOMCL1256	ORTHOMCL1250
ORTHOMCL1245	ORTHOMCL1293	ORTHOMCL1248	ORTHOMCL1304	ORTHOMCL1252	ORTHOMCL1261	ORTHOMCL1254	ORTHOMCL1251	ORTHOMCL1251	ORTHOMCL1257	ORTHOMCL1251
ORTHOMCL1246	ORTHOMCL1294	ORTHOMCL1249	ORTHOMCL1305	ORTHOMCL1253	ORTHOMCL1262	ORTHOMCL1255	ORTHOMCL1252	ORTHOMCL1253	ORTHOMCL1258	ORTHOMCL1252
ORTHOMCL1247	ORTHOMCL1295	ORTHOMCL1250	ORTHOMCL1306	ORTHOMCL1254	ORTHOMCL1263	ORTHOMCL1256	ORTHOMCL1253	ORTHOMCL1254	ORTHOMCL1259	ORTHOMCL1253
ORTHOMCL1248	ORTHOMCL1296	ORTHOMCL1251	ORTHOMCL1307	ORTHOMCL1255	ORTHOMCL1264	ORTHOMCL1257	ORTHOMCL1254	ORTHOMCL1255	ORTHOMCL1260	ORTHOMCL1254
ORTHOMCL1249	ORTHOMCL1297	ORTHOMCL1252	ORTHOMCL1308	ORTHOMCL1256	ORTHOMCL1265	ORTHOMCL1258	ORTHOMCL1255	ORTHOMCL1256	ORTHOMCL1261	ORTHOMCL1256
ORTHOMCL1250	ORTHOMCL1298	ORTHOMCL1253	ORTHOMCL1309	ORTHOMCL1257	ORTHOMCL1266	ORTHOMCL1259	ORTHOMCL1256	ORTHOMCL1257	ORTHOMCL1262	ORTHOMCL1257
ORTHOMCL1251	ORTHOMCL1299	ORTHOMCL1254	ORTHOMCL1310	ORTHOMCL1258	ORTHOMCL1267	ORTHOMCL1260	ORTHOMCL1257	ORTHOMCL1258	ORTHOMCL1263	ORTHOMCL1258
ORTHOMCL1252	ORTHOMCL1300	ORTHOMCL1255	ORTHOMCL1311	ORTHOMCL1259	ORTHOMCL1268	ORTHOMCL1261	ORTHOMCL1258	ORTHOMCL1259	ORTHOMCL1264	ORTHOMCL1259
ORTHOMCL1253	ORTHOMCL1301	ORTHOMCL1256	ORTHOMCL1312	ORTHOMCL1260	ORTHOMCL1269	ORTHOMCL1262	ORTHOMCL1259	ORTHOMCL1260	ORTHOMCL1265	ORTHOMCL1260
ORTHOMCL1254	ORTHOMCL1302	ORTHOMCL1257	ORTHOMCL1313	ORTHOMCL1261	ORTHOMCL1270	ORTHOMCL1263	ORTHOMCL1260	ORTHOMCL1261	ORTHOMCL1266	ORTHOMCL1261
ORTHOMCL1255	ORTHOMCL1303	ORTHOMCL1258	ORTHOMCL1314	ORTHOMCL1262	ORTHOMCL1271	ORTHOMCL1264	ORTHOMCL1261	ORTHOMCL1262	ORTHOMCL1267	ORTHOMCL1262
ORTHOMCL1256	ORTHOMCL1304	ORTHOMCL1259	ORTHOMCL1315	ORTHOMCL1263	ORTHOMCL1272	ORTHOMCL1265	ORTHOMCL1262	ORTHOMCL1263	ORTHOMCL1268	ORTHOMCL1263
ORTHOMCL1257	ORTHOMCL1305	ORTHOMCL1260	ORTHOMCL1316	ORTHOMCL1264	ORTHOMCL1273	ORTHOMCL1266	ORTHOMCL1263	ORTHOMCL1264	ORTHOMCL1269	ORTHOMCL1264
ORTHOMCL1258	ORTHOMCL1306	ORTHOMCL1261	ORTHOMCL1317	ORTHOMCL1265	ORTHOMCL1274	ORTHOMCL1267	ORTHOMCL1264	ORTHOMCL1265	ORTHOMCL1270	ORTHOMCL1265
ORTHOMCL1259	ORTHOMCL1307	ORTHOMCL1262	ORTHOMCL1318	ORTHOMCL1266	ORTHOMCL1275	ORTHOMCL1268	ORTHOMCL1265	ORTHOMCL1266	ORTHOMCL1271	ORTHOMCL1266
ORTHOMCL1260	ORTHOMCL1308	ORTHOMCL1263	ORTHOMCL1319	ORTHOMCL1267	ORTHOMCL1276	ORTHOMCL1269	ORTHOMCL1266	ORTHOMCL1267	ORTHOMCL1272	ORTHOMCL1267
ORTHOMCL1261	ORTHOMCL1310	ORTHOMCL1264	ORTHOMCL1320	ORTHOMCL1268	ORTHOMCL1277	ORTHOMCL1270	ORTHOMCL1267	ORTHOMCL1268	ORTHOMCL1273	ORTHOMCL1268
ORTHOMCL1262	ORTHOMCL1311	ORTHOMCL1265	ORTHOMCL1321	ORTHOMCL1269	ORTHOMCL1278	ORTHOMCL1271	ORTHOMCL1268	ORTHOMCL1269	ORTHOMCL1274	ORTHOMCL1269
ORTHOMCL1263	ORTHOMCL1313	ORTHOMCL1266	ORTHOMCL1322	ORTHOMCL1270	ORTHOMCL1279	ORTHOMCL1272	ORTHOMCL1269	ORTHOMCL1270	ORTHOMCL1275	ORTHOMCL1270
ORTHOMCL1264	ORTHOMCL1314	ORTHOMCL1267	ORTHOMCL1323	ORTHOMCL1271	ORTHOMCL1280	ORTHOMCL1273	ORTHOMCL1270	ORTHOMCL1271	ORTHOMCL1276	ORTHOMCL1272
ORTHOMCL1265	ORTHOMCL1315	ORTHOMCL1268	ORTHOMCL1324	ORTHOMCL1272	ORTHOMCL1281	ORTHOMCL1274	ORTHOMCL1271	ORTHOMCL1272	ORTHOMCL1277	ORTHOMCL1273
ORTHOMCL1266	ORTHOMCL1316	ORTHOMCL1269	ORTHOMCL1325	ORTHOMCL1273	ORTHOMCL1282	ORTHOMCL1275	ORTHOMCL1272	ORTHOMCL1273	ORTHOMCL1278	ORTHOMCL1274
ORTHOMCL1267	ORTHOMCL1317	ORTHOMCL1270	ORTHOMCL1326	ORTHOMCL1274	ORTHOMCL1283	ORTHOMCL1276	ORTHOMCL1273	ORTHOMCL1274	ORTHOMCL1279	ORTHOMCL1275
ORTHOMCL1268	ORTHOMCL1318	ORTHOMCL1271	ORTHOMCL1330	ORTHOMCL1275	ORTHOMCL1284	ORTHOMCL1277	ORTHOMCL1274	ORTHOMCL1275	ORTHOMCL1280	ORTHOMCL1276
ORTHOMCL1269	ORTHOMCL1319	ORTHOMCL1272	ORTHOMCL1331	ORTHOMCL1276	ORTHOMCL1285	ORTHOMCL1278	ORTHOMCL1275	ORTHOMCL1276	ORTHOMCL1281	ORTHOMCL1277
ORTHOMCL1270	ORTHOMCL1320	ORTHOMCL1273	ORTHOMCL1332	ORTHOMCL1277	ORTHOMCL1286	ORTHOMCL1279	ORTHOMCL1276	ORTHOMCL1277	ORTHOMCL1282	ORTHOMCL1278
ORTHOMCL1271	ORTHOMCL1321	ORTHOMCL1274	ORTHOMCL1333	ORTHOMCL1278	ORTHOMCL1287	ORTHOMCL1280	ORTHOMCL1277	ORTHOMCL1278	ORTHOMCL1283	ORTHOMCL1279
ORTHOMCL1272	ORTHOMCL1322	ORTHOMCL1275	ORTHOMCL1334	ORTHOMCL1279	ORTHOMCL1288	ORTHOMCL1281	ORTHOMCL1278	ORTHOMCL1279	ORTHOMCL1284	ORTHOMCL1280
ORTHOMCL1273	ORTHOMCL1323	ORTHOMCL1276	ORTHOMCL1335	ORTHOMCL1280	ORTHOMCL1289	ORTHOMCL1282	ORTHOMCL1279	ORTHOMCL1280	ORTHOMCL1285	ORTHOMCL1281
ORTHOMCL1274	ORTHOMCL1324	ORTHOMCL1277	ORTHOMCL1336	ORTHOMCL1281	ORTHOMCL1290	ORTHOMCL1283	ORTHOMCL1280	ORTHOMCL1281	ORTHOMCL1286	ORTHOMCL1282
ORTHOMCL1275	ORTHOMCL1325	ORTHOMCL1278	ORTHOMCL1337	ORTHOMCL1282	ORTHOMCL1291	ORTHOMCL1284	ORTHOMCL1281	ORTHOMCL1282	ORTHOMCL1287	ORTHOMCL1283
ORTHOMCL1276	ORTHOMCL1326	ORTHOMCL1279	ORTHOMCL1338	ORTHOMCL1283	ORTHOMCL1292	ORTHOMCL1285	ORTHOMCL1282	ORTHOMCL1283	ORTHOMCL1288	ORTHOMCL1284
ORTHOMCL1277	ORTHOMCL1327	ORTHOMCL1280	ORTHOMCL1339	ORTHOMCL1284	ORTHOMCL1293	ORTHOMCL1286	ORTHOMCL1283	ORTHOMCL1284	ORTHOMCL1289	ORTHOMCL1285
ORTHOMCL1278	ORTHOMCL1328	ORTHOMCL1281	ORTHOMCL1340	ORTHOMCL1285	ORTHOMCL1294	ORTHOMCL1287	ORTHOMCL1284	ORTHOMCL1285	ORTHOMCL1290	ORTHOMCL1286
ORTHOMCL1279	ORTHOMCL1330	ORTHOMCL1282	ORTHOMCL1341	ORTHOMCL1286	ORTHOMCL1295	ORTHOMCL1288	ORTHOMCL1285	ORTHOMCL1286	ORTHOMCL1291	ORTHOMCL1287
ORTHOMCL1280	ORTHOMCL1331	ORTHOMCL1283	ORTHOMCL1342	ORTHOMCL1287	ORTHOMCL1296	ORTHOMCL1289	ORTHOMCL1286	ORTHOMCL1287	ORTHOMCL1292	ORTHOMCL1288
ORTHOMCL1281	ORTHOMCL1332	ORTHOMCL1284	ORTHOMCL1343	ORTHOMCL1288	ORTHOMCL1297	ORTHOMCL1290	ORTHOMCL1287	ORTHOMCL1288	ORTHOMCL1293	ORTHOMCL1289
ORTHOMCL1282	ORTHOMCL1333	ORTHOMCL1285	ORTHOMCL1344	ORTHOMCL1289	ORTHOMCL1298	ORTHOMCL1291	ORTHOMCL1288	ORTHOMCL1289	ORTHOMCL1294	ORTHOMCL1290
ORTHOMCL1283	ORTHOMCL1334	ORTHOMCL1286	ORTHOMCL1345	ORTHOMCL1290	ORTHOMCL1299	ORTHOMCL1293	ORTHOMCL1289	ORTHOMCL1290	ORTHOMCL1295	ORTHOMCL1291
ORTHOMCL1284	ORTHOMCL1335	ORTHOMCL1287	ORTHOMCL1347	ORTHOMCL1292	ORTHOMCL1300	ORTHOMCL1294	ORTHOMCL1290	ORTHOMCL1291	ORTHOMCL1296	ORTHOMCL1292
ORTHOMCL1285	ORTHOMCL1336	ORTHOMCL1288	ORTHOMCL1348	ORTHOMCL1293	ORTHOMCL1301	ORTHOMCL1295	ORTHOMCL1291	ORTHOMCL1292	ORTHOMCL1297	ORTHOMCL1293
ORTHOMCL1286	ORTHOMCL1337	ORTHOMCL1289	ORTHOMCL1349	ORTHOMCL1294	ORTHOMCL1302	ORTHOMCL1296	ORTHOMCL1292	ORTHOMCL1293	ORTHOMCL1298	ORTHOMCL1294
ORTHOMCL1287	ORTHOMCL1338	ORTHOMCL1290	ORTHOMCL1350	ORTHOMCL1295	ORTHOMCL1303	ORTHOMCL1297	ORTHOMCL1293	ORTHOMCL1294	ORTHOMCL1299	ORTHOMCL1295
ORTHOMCL1288	ORTHOMCL1339	ORTHOMCL1291	ORTHOMCL1351	ORTHOMCL1296	ORTHOMCL1304	ORTHOMCL1298	ORTHOMCL1294	ORTHOMCL1295	ORTHOMCL1300	ORTHOMCL1296
ORTHOMCL1289	ORTHOMCL1340	ORTHOMCL1292	ORTHOMCL1352	ORTHOMCL1297	ORTHOMCL1305	ORTHOMCL1299	ORTHOMCL1295	ORTHOMCL1296	ORTHOMCL1302	ORTHOMCL1297
ORTHOMCL1290	ORTHOMCL1341	ORTHOMCL1293	ORTHOMCL1353	ORTHOMCL1298	ORTHOMCL1306	ORTHOMCL1300	ORTHOMCL1296	ORTHOMCL1297	ORTHOMCL1303	ORTHOMCL1298
ORTHOMCL1291	ORTHOMCL1342	ORTHOMCL1294	ORTHOMCL1354	ORTHOMCL1299	ORTHOMCL1307	ORTHOMCL1302	ORTHOMCL1297	ORTHOMCL1298	ORTHOMCL1304	ORTHOMCL1299
ORTHOMCL1292	ORTHOMCL1343	ORTHOMCL1295	ORTHOMCL1355	ORTHOMCL1300	ORTHOMCL1308	ORTHOMCL1304	ORTHOMCL1298	ORTHOMCL1299	ORTHOMCL1305	ORTHOMCL1300
ORTHOMCL1293	ORTHOMCL1344	ORTHOMCL1296	ORTHOMCL1356	ORTHOMCL1301	ORTHOMCL1309	ORTHOMCL1305	ORTHOMCL1299	ORTHOMCL1300	ORTHOMCL1306	ORTHOMCL1301
ORTHOMCL1294	ORTHOMCL1345	ORTHOMCL1297	ORTHOMCL1357	ORTHOMCL1302	ORTHOMCL1310	ORTHOMCL1306	ORTHOMCL1300	ORTHOMCL1301	ORTHOMCL1307	ORTHOMCL1302
ORTHOMCL1295	ORTHOMCL1346	ORTHOMCL1298	ORTHOMCL1358	ORTHOMCL1303	ORTHOMCL1311	ORTHOMCL1307	ORTHOMCL1301	ORTHOMCL1302	ORTHOMCL1308	ORTHOMCL1303
ORTHOMCL1296	ORTHOMCL1347	ORTHOMCL1299	ORTHOMCL1359	ORTHOMCL1304	ORTHOMCL1312	ORTHOMCL1308	ORTHOMCL1302	ORTHOMCL1304	ORTHOMCL1309	ORTHOMCL1304
ORTHOMCL1297	ORTHOMCL1348	ORTHOMCL1300	ORTHOMCL1360	ORTHOMCL1305	ORTHOMCL1313	ORTHOMCL1309	ORTHOMCL1303	ORTHOMCL1305	ORTHOMCL1310	ORTHOMCL1305
ORTHOMCL1298	ORTHOMCL1349	ORTHOMCL1301	ORTHOMCL1361	ORTHOMCL1306	ORTHOMCL1314	ORTHOMCL1310	ORTHOMCL1304	ORTHOMCL1306	ORTHOMCL1311	ORTHOMCL1306
ORTHOMCL1299	ORTHOMCL1350	ORTHOMCL1302	ORTHOMCL1362	ORTHOMCL1307	ORTHOMCL1315	ORTHOMCL1311	ORTHOMCL1305	ORTHOMCL1307	ORTHOMCL1312	ORTHOMCL1307
ORTHOMCL1300	ORTHOMCL1351	ORTHOMCL1303	ORTHOMCL1363	ORTHOMCL1308	ORTHOMCL1316	ORTHOMCL1312	ORTHOMCL1306	ORTHOMCL1308	ORTHOMCL1313	ORTHOMCL1308
ORTHOMCL1301	ORTHOMCL1352	ORTHOMCL1304	ORTHOMCL1364	ORTHOMCL1309	ORTHOMCL1317	ORTHOMCL1314	ORTHOMCL1307	ORTHOMCL1309	ORTHOMCL1314	ORTHOMCL1309
ORTHOMCL1302	ORTHOMCL1353	ORTHOMCL1305	ORTHOMCL1365	ORTHOMCL1310	ORTHOMCL1318	ORTHOMCL1315	ORTHOMCL1308	ORTHOMCL1310	ORTHOMCL1315	ORTHOMCL1310
ORTHOMCL1304	ORTHOMCL1354	ORTHOMCL1306	ORTHOMCL1366	ORTHOMCL1311	ORTHOMCL1319	ORTHOMCL1316	ORTHOMCL1309	ORTHOMCL1311	ORTHOMCL1316	ORTHOMCL1311
ORTHOMCL1305	ORTHOMCL1355	ORTHOMCL1307	ORTHOMCL1367	ORTHOMCL1312	ORTHOMCL1320	ORTHOMCL1317	ORTHOMCL1310	ORTHOMCL1312	ORTHOMCL1317	ORTHOMCL1312
ORTHOMCL1306	ORTHOMCL1356	ORTHOMCL1308	ORTHOMCL1368	ORTHOMCL1313	ORTHOMCL1321	ORTHOMCL1318	ORTHOMCL1311	ORTHOMCL1313	ORTHOMCL1318	ORTHOMCL1313
ORTHOMCL1307	ORTHOMCL1357	ORTHOMCL1309	ORTHOMCL1369	ORTHOMCL1314	ORTHOMCL1322	ORTHOMCL1319	ORTHOMCL1312	ORTHOMCL1314	ORTHOMCL1319	ORTHOMCL1314
ORTHOMCL1308	ORTHOMCL1358	ORTHOMCL1310	ORTHOMCL1370	ORTHOMCL1315	ORTHOMCL1323	ORTHOMCL1320	ORTHOMCL1314	ORTHOMCL1315	ORTHOMCL1321	ORTHOMCL1315
ORTHOMCL1309	ORTHOMCL1359	ORTHOMCL1311	ORTHOMCL1371	ORTHOMCL1316	ORTHOMCL1324	ORTHOMCL1321	ORTHOMCL1315	ORTHOMCL1316	ORTHOMCL1322	ORTHOMCL1316
ORTHOMCL1310	ORTHOMCL1360	ORTHOMCL1313	ORTHOMCL1372	ORTHOMCL1317	ORTHOMCL1325	ORTHOMCL1322	ORTHOMCL1316	ORTHOMCL1317	ORTHOMCL1323	ORTHOMCL1317
ORTHOMCL1311	ORTHOMCL1361	ORTHOMCL1314	ORTHOMCL1373	ORTHOMCL1318	ORTHOMCL1326	ORTHOMCL1323	ORTHOMCL1317	ORTHOMCL1318	ORTHOMCL1324	ORTHOMCL1318
ORTHOMCL1312	ORTHOMCL1362	ORTHOMCL1315	ORTHOMCL1374	ORTHOMCL1319	ORTHOMCL1327	ORTHOMCL1324	ORTHOMCL1318	ORTHOMCL1319	ORTHOMCL1325	ORTHOMCL1319
ORTHOMCL1313	ORTHOMCL1363	ORTHOMCL1316	ORTHOMCL1375	ORTHOMCL1320	ORTHOMCL1328	ORTHOMCL1325	ORTHOMCL1319	ORTHOMCL1320	ORTHOMCL1326	ORTHOMCL1320
ORTHOMCL1314	ORTHOMCL1364	ORTHOMCL1317	ORTHOMCL1376	ORTHOMCL1321	ORTHOMCL1329	ORTHOMCL1326	ORTHOMCL1320	ORTHOMCL1321	ORTHOMCL1327	ORTHOMCL1321
ORTHOMCL1315	ORTHOMCL1365	ORTHOMCL1318	ORTHOMCL1377	ORTHOMCL1322	ORTHOMCL1330	ORTHOMCL1327	ORTHOMCL1321	ORTHOMCL1322	ORTHOMCL1328	ORTHOMCL1322
ORTHOMCL1316	ORTHOMCL1366	ORTHOMCL1319	ORTHOMCL1378	ORTHOMCL1323	ORTHOMCL1331	ORTHOMCL1328	ORTHOMCL1322	ORTHOMCL1323	ORTHOMCL1329	ORTHOMCL1323
ORTHOMCL1317	ORTHOMCL1367	ORTHOMCL1320	ORTHOMCL1379	ORTHOMCL1324	ORTHOMCL1333	ORTHOMCL1329	ORTHOMCL1323	ORTHOMCL1324	ORTHOMCL1331	ORTHOMCL1324
ORTHOMCL1318	ORTHOMCL1368	ORTHOMCL1321	ORTHOMCL1380	ORTHOMCL1325	ORTHOMCL1334	ORTHOMCL1330	ORTHOMCL1324	ORTHOMCL1325	ORTHOMCL1332	ORTHOMCL1325
ORTHOMCL1319	ORTHOMCL1369	ORTHOMCL1322	ORTHOMCL1381	ORTHOMCL1326	ORTHOMCL1335	ORTHOMCL1331	ORTHOMCL1325	ORTHOMCL1326	ORTHOMCL1333	ORTHOMCL1326
ORTHOMCL1320	ORTHOMCL1370	ORTHOMCL1323	ORTHOMCL1382	ORTHOMCL1327	ORTHOMCL1336	ORTHOMCL1332	ORTHOMCL1326	ORTHOMCL1327	ORTHOMCL1334	ORTHOMCL1327
ORTHOMCL1321	ORTHOMCL1371	ORTHOMCL1324	ORTHOMCL1383	ORTHOMCL1328	ORTHOMCL1337	ORTHOMCL1333	ORTHOMCL1327	ORTHOMCL1328	ORTHOMCL1335	ORTHOMCL1328
ORTHOMCL1322	ORTHOMCL1372	ORTHOMCL1325	ORTHOMCL1384	ORTHOMCL1329	ORTHOMCL1338	ORTHOMCL1334	ORTHOMCL1328	ORTHOMCL1329	ORTHOMCL1336	ORTHOMCL1330
ORTHOMCL1323	ORTHOMCL1373	ORTHOMCL1326	ORTHOMCL1385	ORTHOMCL1330	ORTHOMCL1339	ORTHOMCL1335	ORTHOMCL1329	ORTHOMCL1330	ORTHOMCL1337	ORTHOMCL1331
ORTHOMCL1324	ORTHOMCL1374	ORTHOMCL1327	ORTHOMCL1386	ORTHOMCL1331	ORTHOMCL1340	ORTHOMCL1336	ORTHOMCL1331	ORTHOMCL1331	ORTHOMCL1338	ORTHOMCL1332
ORTHOMCL1325	ORTHOMCL1375	ORTHOMCL1328	ORTHOMCL1387	ORTHOMCL1332	ORTHOMCL1341	ORTHOMCL1337	ORTHOMCL1332	ORTHOMCL1332	ORTHOMCL1339	ORTHOMCL1333
ORTHOMCL1326	ORTHOMCL1376	ORTHOMCL1329	ORTHOMCL1388	ORTHOMCL1333	ORTHOMCL1342	ORTHOMCL1338	ORTHOMCL1333	ORTHOMCL1333	ORTHOMCL1340	ORTHOMCL1334
ORTHOMCL1327	ORTHOMCL1377	ORTHOMCL1330	ORTHOMCL1389	ORTHOMCL1334	ORTHOMCL1343	ORTHOMCL1339	ORTHOMCL1334	ORTHOMCL1334	ORTHOMCL1341	ORTHOMCL1335
ORTHOMCL1328	ORTHOMCL1378	ORTHOMCL1331	ORTHOMCL1390	ORTHOMCL1335	ORTHOMCL1344	ORTHOMCL1340	ORTHOMCL1335	ORTHOMCL1335	ORTHOMCL1342	ORTHOMCL1336
ORTHOMCL1330	ORTHOMCL1379	ORTHOMCL1332	ORTHOMCL1391	ORTHOMCL1336	ORTHOMCL1345	ORTHOMCL1341	ORTHOMCL1336	ORTHOMCL1336	ORTHOMCL1343	ORTHOMCL1337
ORTHOMCL1331	ORTHOMCL1380	ORTHOMCL1333	ORTHOMCL1392	ORTHOMCL1337	ORTHOMCL1346	ORTHOMCL1342	ORTHOMCL1337	ORTHOMCL1337	ORTHOMCL1344	ORTHOMCL1338
ORTHOMCL1332	ORTHOMCL1381	ORTHOMCL1334	ORTHOMCL1393	ORTHOMCL1338	ORTHOMCL1347	ORTHOMCL1343	ORTHOMCL1338	ORTHOMCL1338	ORTHOMCL1345	ORTHOMCL1339
ORTHOMCL1333	ORTHOMCL1382	ORTHOMCL1335	ORTHOMCL1394	ORTHOMCL1339	ORTHOMCL1348	ORTHOMCL1344	ORTHOMCL1339	ORTHOMCL1339	ORTHOMCL1346	ORTHOMCL1340
ORTHOMCL1334	ORTHOMCL1383	ORTHOMCL1336	ORTHOMCL1395	ORTHOMCL1340	ORTHOMCL1349	ORTHOMCL1345	ORTHOMCL1340	ORTHOMCL1340	ORTHOMCL1347	ORTHOMCL1341
ORTHOMCL1335	ORTHOMCL1384	ORTHOMCL1338	ORTHOMCL1396	ORTHOMCL1341	ORTHOMCL1350	ORTHOMCL1346	ORTHOMCL1341	ORTHOMCL1341	ORTHOMCL1348	ORTHOMCL1342
ORTHOMCL1336	ORTHOMCL1385	ORTHOMCL1339	ORTHOMCL1397	ORTHOMCL1342	ORTHOMCL1351	ORTHOMCL1347	ORTHOMCL1342	ORTHOMCL1342	ORTHOMCL1349	ORTHOMCL1343
ORTHOMCL1337	ORTHOMCL1386	ORTHOMCL1340	ORTHOMCL1398	ORTHOMCL1343	ORTHOMCL1352	ORTHOMCL1348	ORTHOMCL1343	ORTHOMCL1343	ORTHOMCL1350	ORTHOMCL1344
ORTHOMCL1338	ORTHOMCL1387	ORTHOMCL1341	ORTHOMCL1399	ORTHOMCL1344	ORTHOMCL1353	ORTHOMCL1349	ORTHOMCL1344	ORTHOMCL1344	ORTHOMCL1351	ORTHOMCL1345
ORTHOMCL1340	ORTHOMCL1388	ORTHOMCL1342	ORTHOMCL1400	ORTHOMCL1345	ORTHOMCL1354	ORTHOMCL1350	ORTHOMCL1345	ORTHOMCL1345	ORTHOMCL1352	ORTHOMCL1346
ORTHOMCL1341	ORTHOMCL1389	ORTHOMCL1343	ORTHOMCL1401	ORTHOMCL1346	ORTHOMCL1355	ORTHOMCL1351	ORTHOMCL1346	ORTHOMCL1346	ORTHOMCL1353	ORTHOMCL1347
ORTHOMCL1342	ORTHOMCL1390	ORTHOMCL1344	ORTHOMCL1402	ORTHOMCL1347	ORTHOMCL1356	ORTHOMCL1352	ORTHOMCL1347	ORTHOMCL1347	ORTHOMCL1354	ORTHOMCL1348
ORTHOMCL1343	ORTHOMCL1391	ORTHOMCL1345	ORTHOMCL1403	ORTHOMCL1348	ORTHOMCL1357	ORTHOMCL1353	ORTHOMCL1348	ORTHOMCL1349	ORTHOMCL1355	ORTHOMCL1349
ORTHOMCL1344	ORTHOMCL1392	ORTHOMCL1346	ORTHOMCL1404	ORTHOMCL1349	ORTHOMCL1358	ORTHOMCL1354	ORTHOMCL1349	ORTHOMCL1350	ORTHOMCL1356	ORTHOMCL1350
ORTHOMCL1345	ORTHOMCL1393	ORTHOMCL1347	ORTHOMCL1405	ORTHOMCL1350	ORTHOMCL1359	ORTHOMCL1355	ORTHOMCL1350	ORTHOMCL1351	ORTHOMCL1357	ORTHOMCL1351
ORTHOMCL1346	ORTHOMCL1394	ORTHOMCL1348	ORTHOMCL1406	ORTHOMCL1351	ORTHOMCL1360	ORTHOMCL1356	ORTHOMCL1351	ORTHOMCL1352	ORTHOMCL1358	ORTHOMCL1352
ORTHOMCL1347	ORTHOMCL1395	ORTHOMCL1349	ORTHOMCL1407	ORTHOMCL1352	ORTHOMCL1361	ORTHOMCL1357	ORTHOMCL1352	ORTHOMCL1353	ORTHOMCL1359	ORTHOMCL1353
ORTHOMCL1348	ORTHOMCL1396	ORTHOMCL1350	ORTHOMCL1408	ORTHOMCL1353	ORTHOMCL1362	ORTHOMCL1358	ORTHOMCL1353	ORTHOMCL1354	ORTHOMCL1360	ORTHOMCL1354
ORTHOMCL1349	ORTHOMCL1397	ORTHOMCL1351	ORTHOMCL1409	ORTHOMCL1354	ORTHOMCL1363	ORTHOMCL1359	ORTHOMCL1354	ORTHOMCL1355	ORTHOMCL1361	ORTHOMCL1355
ORTHOMCL1350	ORTHOMCL1398	ORTHOMCL1352	ORTHOMCL1410	ORTHOMCL1355	ORTHOMCL1364	ORTHOMCL1360	ORTHOMCL1356	ORTHOMCL1356	ORTHOMCL1362	ORTHOMCL1356
ORTHOMCL1351	ORTHOMCL1399	ORTHOMCL1353	ORTHOMCL1411	ORTHOMCL1356	ORTHOMCL1365	ORTHOMCL1361	ORTHOMCL1357	ORTHOMCL1357	ORTHOMCL1363	ORTHOMCL1357
ORTHOMCL1352	ORTHOMCL1400	ORTHOMCL1354	ORTHOMCL1412	ORTHOMCL1357	ORTHOMCL1366	ORTHOMCL1362	ORTHOMCL1358	ORTHOMCL1358	ORTHOMCL1364	ORTHOMCL1358
ORTHOMCL1353	ORTHOMCL1401	ORTHOMCL1355	ORTHOMCL1413	ORTHOMCL1358	ORTHOMCL1367	ORTHOMCL1363	ORTHOMCL1359	ORTHOMCL1359	ORTHOMCL1365	ORTHOMCL1359
ORTHOMCL1354	ORTHOMCL1403	ORTHOMCL1356	ORTHOMCL1414	ORTHOMCL1359	ORTHOMCL1368	ORTHOMCL1364	ORTHOMCL1360	ORTHOMCL1360	ORTHOMCL1366	ORTHOMCL1360
ORTHOMCL1355	ORTHOMCL1404	ORTHOMCL1357	ORTHOMCL1415	ORTHOMCL1360	ORTHOMCL1369	ORTHOMCL1365	ORTHOMCL1361	ORTHOMCL1361	ORTHOMCL1367	ORTHOMCL1361
ORTHOMCL1356	ORTHOMCL1405	ORTHOMCL1358	ORTHOMCL1416	ORTHOMCL1361	ORTHOMCL1370	ORTHOMCL1366	ORTHOMCL1362	ORTHOMCL1362	ORTHOMCL1368	ORTHOMCL1362
ORTHOMCL1357	ORTHOMCL1406	ORTHOMCL1359	ORTHOMCL1417	ORTHOMCL1362	ORTHOMCL1371	ORTHOMCL1367	ORTHOMCL1363	ORTHOMCL1363	ORTHOMCL1369	ORTHOMCL1363
ORTHOMCL1358	ORTHOMCL1407	ORTHOMCL1360	ORTHOMCL1418	ORTHOMCL1363	ORTHOMCL1372	ORTHOMCL1368	ORTHOMCL1364	ORTHOMCL1364	ORTHOMCL1370	ORTHOMCL1364
ORTHOMCL1359	ORTHOMCL1408	ORTHOMCL1361	ORTHOMCL1419	ORTHOMCL1364	ORTHOMCL1373	ORTHOMCL1369	ORTHOMCL1365	ORTHOMCL1365	ORTHOMCL1371	ORTHOMCL1365
ORTHOMCL1360	ORTHOMCL1409	ORTHOMCL1362	ORTHOMCL1420	ORTHOMCL1365	ORTHOMCL1374	ORTHOMCL1370	ORTHOMCL1366	ORTHOMCL1366	ORTHOMCL1372	ORTHOMCL1366
ORTHOMCL1361	ORTHOMCL1410	ORTHOMCL1363	ORTHOMCL1421	ORTHOMCL1366	ORTHOMCL1375	ORTHOMCL1371	ORTHOMCL1367	ORTHOMCL1367	ORTHOMCL1373	ORTHOMCL1367
ORTHOMCL1362	ORTHOMCL1411	ORTHOMCL1364	ORTHOMCL1422	ORTHOMCL1367	ORTHOMCL1376	ORTHOMCL1372	ORTHOMCL1368	ORTHOMCL1368	ORTHOMCL1374	ORTHOMCL1368
ORTHOMCL1363	ORTHOMCL1412	ORTHOMCL1365	ORTHOMCL1423	ORTHOMCL1368	ORTHOMCL1377	ORTHOMCL1373	ORTHOMCL1369	ORTHOMCL1369	ORTHOMCL1375	ORTHOMCL1369
ORTHOMCL1364	ORTHOMCL1413	ORTHOMCL1366	ORTHOMCL1424	ORTHOMCL1369	ORTHOMCL1378	ORTHOMCL1374	ORTHOMCL1370	ORTHOMCL1370	ORTHOMCL1376	ORTHOMCL1370
ORTHOMCL1365	ORTHOMCL1414	ORTHOMCL1367	ORTHOMCL1425	ORTHOMCL1370	ORTHOMCL1379	ORTHOMCL1375	ORTHOMCL1371	ORTHOMCL1371	ORTHOMCL1377	ORTHOMCL1371
ORTHOMCL1366	ORTHOMCL1415	ORTHOMCL1368	ORTHOMCL1426	ORTHOMCL1371	ORTHOMCL1380	ORTHOMCL1376	ORTHOMCL1372	ORTHOMCL1372	ORTHOMCL1378	ORTHOMCL1372
ORTHOMCL1367	ORTHOMCL1416	ORTHOMCL1369	ORTHOMCL1427	ORTHOMCL1372	ORTHOMCL1381	ORTHOMCL1377	ORTHOMCL1373	ORTHOMCL1373	ORTHOMCL1379	ORTHOMCL1373
ORTHOMCL1368	ORTHOMCL1417	ORTHOMCL1370	ORTHOMCL1428	ORTHOMCL1373	ORTHOMCL1382	ORTHOMCL1378	ORTHOMCL1374	ORTHOMCL1374	ORTHOMCL1380	ORTHOMCL1374
ORTHOMCL1369	ORTHOMCL1418	ORTHOMCL1371	ORTHOMCL1430	ORTHOMCL1374	ORTHOMCL1383	ORTHOMCL1379	ORTHOMCL1375	ORTHOMCL1375	ORTHOMCL1381	ORTHOMCL1375
ORTHOMCL1370	ORTHOMCL1419	ORTHOMCL1372	ORTHOMCL1431	ORTHOMCL1375	ORTHOMCL1384	ORTHOMCL1380	ORTHOMCL1376	ORTHOMCL1376	ORTHOMCL1382	ORTHOMCL1376
ORTHOMCL1371	ORTHOMCL1420	ORTHOMCL1373	ORTHOMCL1432	ORTHOMCL1376	ORTHOMCL1385	ORTHOMCL1381	ORTHOMCL1377	ORTHOMCL1377	ORTHOMCL1383	ORTHOMCL1377
ORTHOMCL1372	ORTHOMCL1421	ORTHOMCL1374	ORTHOMCL1434	ORTHOMCL1377	ORTHOMCL1386	ORTHOMCL1382	ORTHOMCL1378	ORTHOMCL1378	ORTHOMCL1384	ORTHOMCL1378
ORTHOMCL1373	ORTHOMCL1422	ORTHOMCL1375	ORTHOMCL1435	ORTHOMCL1378	ORTHOMCL1387	ORTHOMCL1383	ORTHOMCL1379	ORTHOMCL1379	ORTHOMCL1385	ORTHOMCL1379
ORTHOMCL1374	ORTHOMCL1423	ORTHOMCL1376	ORTHOMCL1436	ORTHOMCL1379	ORTHOMCL1388	ORTHOMCL1384	ORTHOMCL1380	ORTHOMCL1380	ORTHOMCL1386	ORTHOMCL1380
ORTHOMCL1375	ORTHOMCL1424	ORTHOMCL1377	ORTHOMCL1437	ORTHOMCL1380	ORTHOMCL1389	ORTHOMCL1385	ORTHOMCL1381	ORTHOMCL1381	ORTHOMCL1387	ORTHOMCL1381
ORTHOMCL1376	ORTHOMCL1425	ORTHOMCL1378	ORTHOMCL1438	ORTHOMCL1381	ORTHOMCL1390	ORTHOMCL1386	ORTHOMCL1382	ORTHOMCL1382	ORTHOMCL1388	ORTHOMCL1382
ORTHOMCL1377	ORTHOMCL1426	ORTHOMCL1379	ORTHOMCL1439	ORTHOMCL1382	ORTHOMCL1391	ORTHOMCL1387	ORTHOMCL1383	ORTHOMCL1383	ORTHOMCL1389	ORTHOMCL1383
ORTHOMCL1378	ORTHOMCL1427	ORTHOMCL1380	ORTHOMCL1440	ORTHOMCL1383	ORTHOMCL1392	ORTHOMCL1388	ORTHOMCL1384	ORTHOMCL1384	ORTHOMCL1390	ORTHOMCL1384
ORTHOMCL1379	ORTHOMCL1428	ORTHOMCL1381	ORTHOMCL1441	ORTHOMCL1384	ORTHOMCL1393	ORTHOMCL1389	ORTHOMCL1385	ORTHOMCL1385	ORTHOMCL1391	ORTHOMCL1385
ORTHOMCL1380	ORTHOMCL1429	ORTHOMCL1382	ORTHOMCL1442	ORTHOMCL1385	ORTHOMCL1394	ORTHOMCL1390	ORTHOMCL1386	ORTHOMCL1386	ORTHOMCL1392	ORTHOMCL1386
ORTHOMCL1381	ORTHOMCL1430	ORTHOMCL1383	ORTHOMCL1443	ORTHOMCL1386	ORTHOMCL1395	ORTHOMCL1391	ORTHOMCL1387	ORTHOMCL1387	ORTHOMCL1393	ORTHOMCL1387
ORTHOMCL1382	ORTHOMCL1431	ORTHOMCL1384	ORTHOMCL1444	ORTHOMCL1387	ORTHOMCL1396	ORTHOMCL1392	ORTHOMCL1388	ORTHOMCL1388	ORTHOMCL1394	ORTHOMCL1388
ORTHOMCL1383	ORTHOMCL1432	ORTHOMCL1385	ORTHOMCL1445	ORTHOMCL1388	ORTHOMCL1397	ORTHOMCL1393	ORTHOMCL1389	ORTHOMCL1389	ORTHOMCL1395	ORTHOMCL1389
ORTHOMCL1384	ORTHOMCL1433	ORTHOMCL1386	ORTHOMCL1446	ORTHOMCL1389	ORTHOMCL1398	ORTHOMCL1394	ORTHOMCL1390	ORTHOMCL1390	ORTHOMCL1396	ORTHOMCL1390
ORTHOMCL1385	ORTHOMCL1434	ORTHOMCL1387	ORTHOMCL1447	ORTHOMCL1390	ORTHOMCL1399	ORTHOMCL1395	ORTHOMCL1392	ORTHOMCL1391	ORTHOMCL1397	ORTHOMCL1391
ORTHOMCL1386	ORTHOMCL1435	ORTHOMCL1388	ORTHOMCL1448	ORTHOMCL1391	ORTHOMCL1400	ORTHOMCL1396	ORTHOMCL1393	ORTHOMCL1392	ORTHOMCL1398	ORTHOMCL1392
ORTHOMCL1387	ORTHOMCL1436	ORTHOMCL1389	ORTHOMCL1449	ORTHOMCL1392	ORTHOMCL1401	ORTHOMCL1397	ORTHOMCL1394	ORTHOMCL1393	ORTHOMCL1399	ORTHOMCL1393
ORTHOMCL1388	ORTHOMCL1437	ORTHOMCL1390	ORTHOMCL1450	ORTHOMCL1393	ORTHOMCL1402	ORTHOMCL1398	ORTHOMCL1395	ORTHOMCL1394	ORTHOMCL1400	ORTHOMCL1394
ORTHOMCL1389	ORTHOMCL1438	ORTHOMCL1391	ORTHOMCL1451	ORTHOMCL1394	ORTHOMCL1403	ORTHOMCL1399	ORTHOMCL1396	ORTHOMCL1395	ORTHOMCL1401	ORTHOMCL1395
ORTHOMCL1390	ORTHOMCL1439	ORTHOMCL1392	ORTHOMCL1452	ORTHOMCL1395	ORTHOMCL1404	ORTHOMCL1400	ORTHOMCL1397	ORTHOMCL1396	ORTHOMCL1402	ORTHOMCL1396
ORTHOMCL1391	ORTHOMCL1440	ORTHOMCL1393	ORTHOMCL1453	ORTHOMCL1396	ORTHOMCL1405	ORTHOMCL1401	ORTHOMCL1398	ORTHOMCL1397	ORTHOMCL1403	ORTHOMCL1397
ORTHOMCL1392	ORTHOMCL1441	ORTHOMCL1394	ORTHOMCL1454	ORTHOMCL1397	ORTHOMCL1406	ORTHOMCL1402	ORTHOMCL1399	ORTHOMCL1398	ORTHOMCL1404	ORTHOMCL1398
ORTHOMCL1393	ORTHOMCL1442	ORTHOMCL1395	ORTHOMCL1455	ORTHOMCL1398	ORTHOMCL1407	ORTHOMCL1403	ORTHOMCL1400	ORTHOMCL1399	ORTHOMCL1405	ORTHOMCL1399
ORTHOMCL1394	ORTHOMCL1443	ORTHOMCL1396	ORTHOMCL1456	ORTHOMCL1399	ORTHOMCL1408	ORTHOMCL1404	ORTHOMCL1401	ORTHOMCL1400	ORTHOMCL1406	ORTHOMCL1400
ORTHOMCL1395	ORTHOMCL1444	ORTHOMCL1397	ORTHOMCL1457	ORTHOMCL1400	ORTHOMCL1409	ORTHOMCL1405	ORTHOMCL1403	ORTHOMCL1401	ORTHOMCL1407	ORTHOMCL1401
ORTHOMCL1396	ORTHOMCL1445	ORTHOMCL1398	ORTHOMCL1458	ORTHOMCL1401	ORTHOMCL1410	ORTHOMCL1406	ORTHOMCL1404	ORTHOMCL1402	ORTHOMCL1408	ORTHOMCL1402
ORTHOMCL1397	ORTHOMCL1447	ORTHOMCL1399	ORTHOMCL1459	ORTHOMCL1403	ORTHOMCL1411	ORTHOMCL1407	ORTHOMCL1405	ORTHOMCL1403	ORTHOMCL1409	ORTHOMCL1403
ORTHOMCL1398	ORTHOMCL1448	ORTHOMCL1400	ORTHOMCL1460	ORTHOMCL1404	ORTHOMCL1412	ORTHOMCL1408	ORTHOMCL1406	ORTHOMCL1404	ORTHOMCL1410	ORTHOMCL1404
ORTHOMCL1399	ORTHOMCL1449	ORTHOMCL1401	ORTHOMCL1461	ORTHOMCL1405	ORTHOMCL1413	ORTHOMCL1409	ORTHOMCL1407	ORTHOMCL1405	ORTHOMCL1411	ORTHOMCL1405
ORTHOMCL1400	ORTHOMCL1450	ORTHOMCL1402	ORTHOMCL1462	ORTHOMCL1406	ORTHOMCL1414	ORTHOMCL1410	ORTHOMCL1408	ORTHOMCL1406	ORTHOMCL1412	ORTHOMCL1406
ORTHOMCL1401	ORTHOMCL1451	ORTHOMCL1403	ORTHOMCL1463	ORTHOMCL1407	ORTHOMCL1415	ORTHOMCL1411	ORTHOMCL1409	ORTHOMCL1407	ORTHOMCL1413	ORTHOMCL1407
ORTHOMCL1402	ORTHOMCL1452	ORTHOMCL1404	ORTHOMCL1464	ORTHOMCL1408	ORTHOMCL1416	ORTHOMCL1412	ORTHOMCL1410	ORTHOMCL1408	ORTHOMCL1414	ORTHOMCL1408
ORTHOMCL1403	ORTHOMCL1453	ORTHOMCL1405	ORTHOMCL1465	ORTHOMCL1409	ORTHOMCL1417	ORTHOMCL1413	ORTHOMCL1411	ORTHOMCL1409	ORTHOMCL1415	ORTHOMCL1409
ORTHOMCL1404	ORTHOMCL1454	ORTHOMCL1406	ORTHOMCL1466	ORTHOMCL1410	ORTHOMCL1418	ORTHOMCL1414	ORTHOMCL1412	ORTHOMCL1410	ORTHOMCL1416	ORTHOMCL1410
ORTHOMCL1405	ORTHOMCL1455	ORTHOMCL1407	ORTHOMCL1467	ORTHOMCL1411	ORTHOMCL1419	ORTHOMCL1415	ORTHOMCL1413	ORTHOMCL1411	ORTHOMCL1417	ORTHOMCL1411
ORTHOMCL1406	ORTHOMCL1456	ORTHOMCL1408	ORTHOMCL1468	ORTHOMCL1412	ORTHOMCL1420	ORTHOMCL1416	ORTHOMCL1414	ORTHOMCL1412	ORTHOMCL1418	ORTHOMCL1412
ORTHOMCL1407	ORTHOMCL1457	ORTHOMCL1409	ORTHOMCL1469	ORTHOMCL1413	ORTHOMCL1421	ORTHOMCL1417	ORTHOMCL1415	ORTHOMCL1413	ORTHOMCL1419	ORTHOMCL1413
ORTHOMCL1408	ORTHOMCL1458	ORTHOMCL1410	ORTHOMCL1470	ORTHOMCL1414	ORTHOMCL1422	ORTHOMCL1418	ORTHOMCL1416	ORTHOMCL1414	ORTHOMCL1420	ORTHOMCL1414
ORTHOMCL1409	ORTHOMCL1459	ORTHOMCL1411	ORTHOMCL1471	ORTHOMCL1415	ORTHOMCL1423	ORTHOMCL1419	ORTHOMCL1417	ORTHOMCL1415	ORTHOMCL1421	ORTHOMCL1415
ORTHOMCL1410	ORTHOMCL1460	ORTHOMCL1412	ORTHOMCL1473	ORTHOMCL1416	ORTHOMCL1424	ORTHOMCL1420	ORTHOMCL1418	ORTHOMCL1416	ORTHOMCL1422	ORTHOMCL1416
ORTHOMCL1411	ORTHOMCL1461	ORTHOMCL1413	ORTHOMCL1474	ORTHOMCL1417	ORTHOMCL1425	ORTHOMCL1421	ORTHOMCL1419	ORTHOMCL1417	ORTHOMCL1423	ORTHOMCL1417
ORTHOMCL1412	ORTHOMCL1462	ORTHOMCL1414	ORTHOMCL1475	ORTHOMCL1418	ORTHOMCL1426	ORTHOMCL1422	ORTHOMCL1420	ORTHOMCL1418	ORTHOMCL1424	ORTHOMCL1418
ORTHOMCL1413	ORTHOMCL1463	ORTHOMCL1415	ORTHOMCL1476	ORTHOMCL1419	ORTHOMCL1427	ORTHOMCL1423	ORTHOMCL1421	ORTHOMCL1419	ORTHOMCL1425	ORTHOMCL1419
ORTHOMCL1414	ORTHOMCL1464	ORTHOMCL1416	ORTHOMCL1477	ORTHOMCL1420	ORTHOMCL1428	ORTHOMCL1424	ORTHOMCL1422	ORTHOMCL1420	ORTHOMCL1426	ORTHOMCL1420
ORTHOMCL1415	ORTHOMCL1465	ORTHOMCL1417	ORTHOMCL1478	ORTHOMCL1421	ORTHOMCL1429	ORTHOMCL1425	ORTHOMCL1423	ORTHOMCL1421	ORTHOMCL1427	ORTHOMCL1421
ORTHOMCL1416	ORTHOMCL1466	ORTHOMCL1418	ORTHOMCL1479	ORTHOMCL1422	ORTHOMCL1430	ORTHOMCL1426	ORTHOMCL1424	ORTHOMCL1422	ORTHOMCL1428	ORTHOMCL1422
ORTHOMCL1417	ORTHOMCL1467	ORTHOMCL1419	ORTHOMCL1480	ORTHOMCL1423	ORTHOMCL1431	ORTHOMCL1427	ORTHOMCL1425	ORTHOMCL1423	ORTHOMCL1429	ORTHOMCL1423
ORTHOMCL1418	ORTHOMCL1468	ORTHOMCL1420	ORTHOMCL1481	ORTHOMCL1424	ORTHOMCL1432	ORTHOMCL1428	ORTHOMCL1426	ORTHOMCL1424	ORTHOMCL1430	ORTHOMCL1424
ORTHOMCL1419	ORTHOMCL1469	ORTHOMCL1421	ORTHOMCL1482	ORTHOMCL1425	ORTHOMCL1433	ORTHOMCL1429	ORTHOMCL1427	ORTHOMCL1425	ORTHOMCL1431	ORTHOMCL1425
ORTHOMCL1420	ORTHOMCL1470	ORTHOMCL1422	ORTHOMCL1484	ORTHOMCL1426	ORTHOMCL1434	ORTHOMCL1430	ORTHOMCL1428	ORTHOMCL1426	ORTHOMCL1432	ORTHOMCL1426
ORTHOMCL1421	ORTHOMCL1471	ORTHOMCL1423	ORTHOMCL1485	ORTHOMCL1427	ORTHOMCL1435	ORTHOMCL1431	ORTHOMCL1429	ORTHOMCL1427	ORTHOMCL1433	ORTHOMCL1427
ORTHOMCL1422	ORTHOMCL1472	ORTHOMCL1424	ORTHOMCL1486	ORTHOMCL1428	ORTHOMCL1436	ORTHOMCL1432	ORTHOMCL1430	ORTHOMCL1428	ORTHOMCL1434	ORTHOMCL1428
ORTHOMCL1423	ORTHOMCL1473	ORTHOMCL1425	ORTHOMCL1487	ORTHOMCL1429	ORTHOMCL1437	ORTHOMCL1434	ORTHOMCL1431	ORTHOMCL1429	ORTHOMCL1435	ORTHOMCL1429
ORTHOMCL1424	ORTHOMCL1475	ORTHOMCL1426	ORTHOMCL1488	ORTHOMCL1430	ORTHOMCL1438	ORTHOMCL1435	ORTHOMCL1432	ORTHOMCL1430	ORTHOMCL1436	ORTHOMCL1430
ORTHOMCL1425	ORTHOMCL1476	ORTHOMCL1427	ORTHOMCL1489	ORTHOMCL1431	ORTHOMCL1439	ORTHOMCL1436	ORTHOMCL1433	ORTHOMCL1431	ORTHOMCL1437	ORTHOMCL1431
ORTHOMCL1426	ORTHOMCL1477	ORTHOMCL1428	ORTHOMCL1490	ORTHOMCL1432	ORTHOMCL1440	ORTHOMCL1437	ORTHOMCL1434	ORTHOMCL1432	ORTHOMCL1438	ORTHOMCL1432
ORTHOMCL1427	ORTHOMCL1478	ORTHOMCL1429	ORTHOMCL1491	ORTHOMCL1433	ORTHOMCL1441	ORTHOMCL1438	ORTHOMCL1435	ORTHOMCL1433	ORTHOMCL1439	ORTHOMCL1433
ORTHOMCL1428	ORTHOMCL1479	ORTHOMCL1430	ORTHOMCL1492	ORTHOMCL1434	ORTHOMCL1442	ORTHOMCL1439	ORTHOMCL1436	ORTHOMCL1434	ORTHOMCL1440	ORTHOMCL1434
ORTHOMCL1429	ORTHOMCL1480	ORTHOMCL1431	ORTHOMCL1493	ORTHOMCL1435	ORTHOMCL1443	ORTHOMCL1440	ORTHOMCL1437	ORTHOMCL1435	ORTHOMCL1441	ORTHOMCL1435
ORTHOMCL1430	ORTHOMCL1481	ORTHOMCL1432	ORTHOMCL1494	ORTHOMCL1436	ORTHOMCL1444	ORTHOMCL1441	ORTHOMCL1438	ORTHOMCL1436	ORTHOMCL1442	ORTHOMCL1436
ORTHOMCL1431	ORTHOMCL1482	ORTHOMCL1433	ORTHOMCL1495	ORTHOMCL1437	ORTHOMCL1445	ORTHOMCL1442	ORTHOMCL1439	ORTHOMCL1437	ORTHOMCL1443	ORTHOMCL1437
ORTHOMCL1432	ORTHOMCL1483	ORTHOMCL1434	ORTHOMCL1496	ORTHOMCL1438	ORTHOMCL1446	ORTHOMCL1443	ORTHOMCL1440	ORTHOMCL1438	ORTHOMCL1444	ORTHOMCL1438
ORTHOMCL1433	ORTHOMCL1484	ORTHOMCL1435	ORTHOMCL1497	ORTHOMCL1439	ORTHOMCL1447	ORTHOMCL1444	ORTHOMCL1441	ORTHOMCL1439	ORTHOMCL1445	ORTHOMCL1439
ORTHOMCL1434	ORTHOMCL1485	ORTHOMCL1436	ORTHOMCL1498	ORTHOMCL1440	ORTHOMCL1448	ORTHOMCL1445	ORTHOMCL1442	ORTHOMCL1440	ORTHOMCL1446	ORTHOMCL1440
ORTHOMCL1435	ORTHOMCL1486	ORTHOMCL1437	ORTHOMCL1499	ORTHOMCL1441	ORTHOMCL1449	ORTHOMCL1446	ORTHOMCL1443	ORTHOMCL1441	ORTHOMCL1447	ORTHOMCL1441
ORTHOMCL1436	ORTHOMCL1487	ORTHOMCL1438	ORTHOMCL1500	ORTHOMCL1442	ORTHOMCL1450	ORTHOMCL1447	ORTHOMCL1444	ORTHOMCL1442	ORTHOMCL1448	ORTHOMCL1442
ORTHOMCL1437	ORTHOMCL1488	ORTHOMCL1439	ORTHOMCL1501	ORTHOMCL1443	ORTHOMCL1451	ORTHOMCL1448	ORTHOMCL1445	ORTHOMCL1443	ORTHOMCL1449	ORTHOMCL1443
ORTHOMCL1438	ORTHOMCL1489	ORTHOMCL1440	ORTHOMCL1502	ORTHOMCL1444	ORTHOMCL1452	ORTHOMCL1449	ORTHOMCL1446	ORTHOMCL1444	ORTHOMCL1450	ORTHOMCL1444
ORTHOMCL1439	ORTHOMCL1490	ORTHOMCL1441	ORTHOMCL1503	ORTHOMCL1445	ORTHOMCL1453	ORTHOMCL1450	ORTHOMCL1447	ORTHOMCL1445	ORTHOMCL1451	ORTHOMCL1445
ORTHOMCL1440	ORTHOMCL1491	ORTHOMCL1442	ORTHOMCL1504	ORTHOMCL1446	ORTHOMCL1454	ORTHOMCL1451	ORTHOMCL1448	ORTHOMCL1446	ORTHOMCL1452	ORTHOMCL1446
ORTHOMCL1441	ORTHOMCL1492	ORTHOMCL1443	ORTHOMCL1505	ORTHOMCL1447	ORTHOMCL1455	ORTHOMCL1452	ORTHOMCL1449	ORTHOMCL1447	ORTHOMCL1453	ORTHOMCL1447
ORTHOMCL1442	ORTHOMCL1493	ORTHOMCL1444	ORTHOMCL1506	ORTHOMCL1448	ORTHOMCL1456	ORTHOMCL1453	ORTHOMCL1450	ORTHOMCL1448	ORTHOMCL1454	ORTHOMCL1448
ORTHOMCL1443	ORTHOMCL1494	ORTHOMCL1445	ORTHOMCL1507	ORTHOMCL1449	ORTHOMCL1457	ORTHOMCL1454	ORTHOMCL1451	ORTHOMCL1449	ORTHOMCL1455	ORTHOMCL1449
ORTHOMCL1444	ORTHOMCL1495	ORTHOMCL1446	ORTHOMCL1508	ORTHOMCL1450	ORTHOMCL1458	ORTHOMCL1455	ORTHOMCL1452	ORTHOMCL1450	ORTHOMCL1456	ORTHOMCL1450
ORTHOMCL1445	ORTHOMCL1496	ORTHOMCL1447	ORTHOMCL1509	ORTHOMCL1451	ORTHOMCL1459	ORTHOMCL1456	ORTHOMCL1453	ORTHOMCL1451	ORTHOMCL1457	ORTHOMCL1451
ORTHOMCL1446	ORTHOMCL1497	ORTHOMCL1448	ORTHOMCL1510	ORTHOMCL1452	ORTHOMCL1460	ORTHOMCL1457	ORTHOMCL1454	ORTHOMCL1452	ORTHOMCL1458	ORTHOMCL1452
ORTHOMCL1447	ORTHOMCL1498	ORTHOMCL1449	ORTHOMCL1511	ORTHOMCL1453	ORTHOMCL1461	ORTHOMCL1458	ORTHOMCL1455	ORTHOMCL1453	ORTHOMCL1459	ORTHOMCL1453
ORTHOMCL1448	ORTHOMCL1499	ORTHOMCL1450	ORTHOMCL1512	ORTHOMCL1454	ORTHOMCL1462	ORTHOMCL1459	ORTHOMCL1456	ORTHOMCL1454	ORTHOMCL1460	ORTHOMCL1454
ORTHOMCL1449	ORTHOMCL1500	ORTHOMCL1451	ORTHOMCL1513	ORTHOMCL1455	ORTHOMCL1463	ORTHOMCL1460	ORTHOMCL1457	ORTHOMCL1455	ORTHOMCL1461	ORTHOMCL1455
ORTHOMCL1450	ORTHOMCL1501	ORTHOMCL1452	ORTHOMCL1514	ORTHOMCL1456	ORTHOMCL1464	ORTHOMCL1461	ORTHOMCL1458	ORTHOMCL1456	ORTHOMCL1462	ORTHOMCL1456
ORTHOMCL1451	ORTHOMCL1502	ORTHOMCL1453	ORTHOMCL1515	ORTHOMCL1457	ORTHOMCL1465	ORTHOMCL1462	ORTHOMCL1459	ORTHOMCL1457	ORTHOMCL1463	ORTHOMCL1457
ORTHOMCL1452	ORTHOMCL1503	ORTHOMCL1454	ORTHOMCL1516	ORTHOMCL1458	ORTHOMCL1466	ORTHOMCL1463	ORTHOMCL1460	ORTHOMCL1458	ORTHOMCL1464	ORTHOMCL1458
ORTHOMCL1453	ORTHOMCL1504	ORTHOMCL1455	ORTHOMCL1517	ORTHOMCL1459	ORTHOMCL1467	ORTHOMCL1464	ORTHOMCL1461	ORTHOMCL1459	ORTHOMCL1465	ORTHOMCL1459
ORTHOMCL1454	ORTHOMCL1505	ORTHOMCL1456	ORTHOMCL1518	ORTHOMCL1460	ORTHOMCL1468	ORTHOMCL1465	ORTHOMCL1462	ORTHOMCL1460	ORTHOMCL1466	ORTHOMCL1460
ORTHOMCL1455	ORTHOMCL1506	ORTHOMCL1457	ORTHOMCL1520	ORTHOMCL1461	ORTHOMCL1469	ORTHOMCL1466	ORTHOMCL1463	ORTHOMCL1461	ORTHOMCL1467	ORTHOMCL1461
ORTHOMCL1456	ORTHOMCL1507	ORTHOMCL1458	ORTHOMCL1521	ORTHOMCL1462	ORTHOMCL1470	ORTHOMCL1467	ORTHOMCL1464	ORTHOMCL1462	ORTHOMCL1468	ORTHOMCL1462
ORTHOMCL1457	ORTHOMCL1508	ORTHOMCL1459	ORTHOMCL1522	ORTHOMCL1463	ORTHOMCL1471	ORTHOMCL1468	ORTHOMCL1465	ORTHOMCL1463	ORTHOMCL1469	ORTHOMCL1463
ORTHOMCL1458	ORTHOMCL1509	ORTHOMCL1460	ORTHOMCL1523	ORTHOMCL1464	ORTHOMCL1472	ORTHOMCL1469	ORTHOMCL1466	ORTHOMCL1464	ORTHOMCL1470	ORTHOMCL1464
ORTHOMCL1459	ORTHOMCL1510	ORTHOMCL1461	ORTHOMCL1524	ORTHOMCL1465	ORTHOMCL1473	ORTHOMCL1470	ORTHOMCL1467	ORTHOMCL1465	ORTHOMCL1471	ORTHOMCL1465
ORTHOMCL1460	ORTHOMCL1511	ORTHOMCL1462	ORTHOMCL1525	ORTHOMCL1466	ORTHOMCL1474	ORTHOMCL1471	ORTHOMCL1468	ORTHOMCL1466	ORTHOMCL1472	ORTHOMCL1466
ORTHOMCL1461	ORTHOMCL1512	ORTHOMCL1463	ORTHOMCL1526	ORTHOMCL1467	ORTHOMCL1475	ORTHOMCL1472	ORTHOMCL1469	ORTHOMCL1467	ORTHOMCL1473	ORTHOMCL1467
ORTHOMCL1462	ORTHOMCL1513	ORTHOMCL1464	ORTHOMCL1528	ORTHOMCL1468	ORTHOMCL1476	ORTHOMCL1473	ORTHOMCL1470	ORTHOMCL1468	ORTHOMCL1474	ORTHOMCL1468
ORTHOMCL1463	ORTHOMCL1514	ORTHOMCL1465	ORTHOMCL1529	ORTHOMCL1469	ORTHOMCL1477	ORTHOMCL1474	ORTHOMCL1471	ORTHOMCL1469	ORTHOMCL1475	ORTHOMCL1469
ORTHOMCL1464	ORTHOMCL1515	ORTHOMCL1466	ORTHOMCL1530	ORTHOMCL1470	ORTHOMCL1478	ORTHOMCL1475	ORTHOMCL1472	ORTHOMCL1470	ORTHOMCL1476	ORTHOMCL1470
ORTHOMCL1465	ORTHOMCL1516	ORTHOMCL1467	ORTHOMCL1531	ORTHOMCL1471	ORTHOMCL1479	ORTHOMCL1476	ORTHOMCL1474	ORTHOMCL1471	ORTHOMCL1477	ORTHOMCL1471
ORTHOMCL1466	ORTHOMCL1517	ORTHOMCL1468	ORTHOMCL1532	ORTHOMCL1472	ORTHOMCL1480	ORTHOMCL1477	ORTHOMCL1475	ORTHOMCL1472	ORTHOMCL1478	ORTHOMCL1472
ORTHOMCL1467	ORTHOMCL1518	ORTHOMCL1469	ORTHOMCL1533	ORTHOMCL1473	ORTHOMCL1481	ORTHOMCL1478	ORTHOMCL1476	ORTHOMCL1473	ORTHOMCL1479	ORTHOMCL1473
ORTHOMCL1468	ORTHOMCL1520	ORTHOMCL1470	ORTHOMCL1534	ORTHOMCL1474	ORTHOMCL1482	ORTHOMCL1479	ORTHOMCL1477	ORTHOMCL1474	ORTHOMCL1480	ORTHOMCL1475
ORTHOMCL1469	ORTHOMCL1521	ORTHOMCL1471	ORTHOMCL1535	ORTHOMCL1475	ORTHOMCL1483	ORTHOMCL1480	ORTHOMCL1478	ORTHOMCL1475	ORTHOMCL1481	ORTHOMCL1476
ORTHOMCL1470	ORTHOMCL1522	ORTHOMCL1472	ORTHOMCL1536	ORTHOMCL1476	ORTHOMCL1484	ORTHOMCL1481	ORTHOMCL1479	ORTHOMCL1476	ORTHOMCL1482	ORTHOMCL1477
ORTHOMCL1471	ORTHOMCL1523	ORTHOMCL1473	ORTHOMCL1537	ORTHOMCL1477	ORTHOMCL1485	ORTHOMCL1482	ORTHOMCL1480	ORTHOMCL1477	ORTHOMCL1483	ORTHOMCL1478
ORTHOMCL1472	ORTHOMCL1524	ORTHOMCL1474	ORTHOMCL1538	ORTHOMCL1478	ORTHOMCL1486	ORTHOMCL1483	ORTHOMCL1481	ORTHOMCL1478	ORTHOMCL1484	ORTHOMCL1479
ORTHOMCL1473	ORTHOMCL1525	ORTHOMCL1475	ORTHOMCL1539	ORTHOMCL1479	ORTHOMCL1487	ORTHOMCL1485	ORTHOMCL1482	ORTHOMCL1479	ORTHOMCL1485	ORTHOMCL1480
ORTHOMCL1475	ORTHOMCL1526	ORTHOMCL1476	ORTHOMCL1540	ORTHOMCL1480	ORTHOMCL1488	ORTHOMCL1486	ORTHOMCL1483	ORTHOMCL1480	ORTHOMCL1486	ORTHOMCL1481
ORTHOMCL1476	ORTHOMCL1527	ORTHOMCL1477	ORTHOMCL1541	ORTHOMCL1481	ORTHOMCL1489	ORTHOMCL1487	ORTHOMCL1484	ORTHOMCL1481	ORTHOMCL1487	ORTHOMCL1482
ORTHOMCL1477	ORTHOMCL1528	ORTHOMCL1478	ORTHOMCL1542	ORTHOMCL1482	ORTHOMCL1490	ORTHOMCL1488	ORTHOMCL1485	ORTHOMCL1482	ORTHOMCL1488	ORTHOMCL1483
ORTHOMCL1478	ORTHOMCL1529	ORTHOMCL1479	ORTHOMCL1543	ORTHOMCL1483	ORTHOMCL1491	ORTHOMCL1489	ORTHOMCL1486	ORTHOMCL1483	ORTHOMCL1489	ORTHOMCL1484
ORTHOMCL1479	ORTHOMCL1530	ORTHOMCL1480	ORTHOMCL1544	ORTHOMCL1484	ORTHOMCL1492	ORTHOMCL1490	ORTHOMCL1487	ORTHOMCL1484	ORTHOMCL1490	ORTHOMCL1485
ORTHOMCL1480	ORTHOMCL1531	ORTHOMCL1481	ORTHOMCL1545	ORTHOMCL1485	ORTHOMCL1493	ORTHOMCL1491	ORTHOMCL1488	ORTHOMCL1485	ORTHOMCL1491	ORTHOMCL1486
ORTHOMCL1481	ORTHOMCL1532	ORTHOMCL1482	ORTHOMCL1546	ORTHOMCL1486	ORTHOMCL1494	ORTHOMCL1492	ORTHOMCL1489	ORTHOMCL1486	ORTHOMCL1492	ORTHOMCL1487
ORTHOMCL1482	ORTHOMCL1533	ORTHOMCL1483	ORTHOMCL1547	ORTHOMCL1487	ORTHOMCL1495	ORTHOMCL1493	ORTHOMCL1490	ORTHOMCL1487	ORTHOMCL1493	ORTHOMCL1488
ORTHOMCL1483	ORTHOMCL1534	ORTHOMCL1484	ORTHOMCL1548	ORTHOMCL1488	ORTHOMCL1496	ORTHOMCL1494	ORTHOMCL1491	ORTHOMCL1488	ORTHOMCL1494	ORTHOMCL1489
ORTHOMCL1484	ORTHOMCL1535	ORTHOMCL1485	ORTHOMCL1549	ORTHOMCL1489	ORTHOMCL1497	ORTHOMCL1495	ORTHOMCL1492	ORTHOMCL1489	ORTHOMCL1495	ORTHOMCL1490
ORTHOMCL1485	ORTHOMCL1536	ORTHOMCL1486	ORTHOMCL1550	ORTHOMCL1490	ORTHOMCL1498	ORTHOMCL1496	ORTHOMCL1493	ORTHOMCL1490	ORTHOMCL1496	ORTHOMCL1491
ORTHOMCL1486	ORTHOMCL1537	ORTHOMCL1487	ORTHOMCL1551	ORTHOMCL1491	ORTHOMCL1499	ORTHOMCL1497	ORTHOMCL1494	ORTHOMCL1491	ORTHOMCL1497	ORTHOMCL1492
ORTHOMCL1487	ORTHOMCL1538	ORTHOMCL1488	ORTHOMCL1552	ORTHOMCL1492	ORTHOMCL1500	ORTHOMCL1498	ORTHOMCL1495	ORTHOMCL1492	ORTHOMCL1499	ORTHOMCL1493
ORTHOMCL1489	ORTHOMCL1539	ORTHOMCL1489	ORTHOMCL1553	ORTHOMCL1493	ORTHOMCL1501	ORTHOMCL1499	ORTHOMCL1496	ORTHOMCL1493	ORTHOMCL1500	ORTHOMCL1494
ORTHOMCL1490	ORTHOMCL1540	ORTHOMCL1490	ORTHOMCL1554	ORTHOMCL1494	ORTHOMCL1502	ORTHOMCL1500	ORTHOMCL1497	ORTHOMCL1494	ORTHOMCL1501	ORTHOMCL1495
ORTHOMCL1491	ORTHOMCL1541	ORTHOMCL1491	ORTHOMCL1555	ORTHOMCL1495	ORTHOMCL1503	ORTHOMCL1501	ORTHOMCL1498	ORTHOMCL1495	ORTHOMCL1502	ORTHOMCL1496
ORTHOMCL1492	ORTHOMCL1542	ORTHOMCL1492	ORTHOMCL1556	ORTHOMCL1496	ORTHOMCL1504	ORTHOMCL1502	ORTHOMCL1499	ORTHOMCL1496	ORTHOMCL1503	ORTHOMCL1497
ORTHOMCL1493	ORTHOMCL1543	ORTHOMCL1493	ORTHOMCL1557	ORTHOMCL1497	ORTHOMCL1505	ORTHOMCL1503	ORTHOMCL1500	ORTHOMCL1497	ORTHOMCL1504	ORTHOMCL1498
ORTHOMCL1494	ORTHOMCL1544	ORTHOMCL1494	ORTHOMCL1558	ORTHOMCL1498	ORTHOMCL1506	ORTHOMCL1504	ORTHOMCL1501	ORTHOMCL1498	ORTHOMCL1505	ORTHOMCL1499
ORTHOMCL1495	ORTHOMCL1545	ORTHOMCL1495	ORTHOMCL1559	ORTHOMCL1499	ORTHOMCL1507	ORTHOMCL1505	ORTHOMCL1502	ORTHOMCL1499	ORTHOMCL1506	ORTHOMCL1500
ORTHOMCL1496	ORTHOMCL1546	ORTHOMCL1496	ORTHOMCL1560	ORTHOMCL1500	ORTHOMCL1508	ORTHOMCL1507	ORTHOMCL1503	ORTHOMCL1500	ORTHOMCL1507	ORTHOMCL1501
ORTHOMCL1497	ORTHOMCL1547	ORTHOMCL1497	ORTHOMCL1561	ORTHOMCL1501	ORTHOMCL1509	ORTHOMCL1508	ORTHOMCL1504	ORTHOMCL1501	ORTHOMCL1508	ORTHOMCL1502
ORTHOMCL1498	ORTHOMCL1548	ORTHOMCL1498	ORTHOMCL1562	ORTHOMCL1502	ORTHOMCL1510	ORTHOMCL1509	ORTHOMCL1505	ORTHOMCL1502	ORTHOMCL1509	ORTHOMCL1503
ORTHOMCL1499	ORTHOMCL1549	ORTHOMCL1499	ORTHOMCL1563	ORTHOMCL1503	ORTHOMCL1511	ORTHOMCL1510	ORTHOMCL1506	ORTHOMCL1503	ORTHOMCL1510	ORTHOMCL1504
ORTHOMCL1500	ORTHOMCL1550	ORTHOMCL1500	ORTHOMCL1565	ORTHOMCL1504	ORTHOMCL1512	ORTHOMCL1511	ORTHOMCL1507	ORTHOMCL1504	ORTHOMCL1511	ORTHOMCL1505
ORTHOMCL1501	ORTHOMCL1551	ORTHOMCL1501	ORTHOMCL1566	ORTHOMCL1505	ORTHOMCL1513	ORTHOMCL1512	ORTHOMCL1508	ORTHOMCL1505	ORTHOMCL1512	ORTHOMCL1506
ORTHOMCL1502	ORTHOMCL1552	ORTHOMCL1502	ORTHOMCL1567	ORTHOMCL1506	ORTHOMCL1514	ORTHOMCL1513	ORTHOMCL1509	ORTHOMCL1506	ORTHOMCL1513	ORTHOMCL1507
ORTHOMCL1503	ORTHOMCL1553	ORTHOMCL1503	ORTHOMCL1568	ORTHOMCL1507	ORTHOMCL1515	ORTHOMCL1514	ORTHOMCL1510	ORTHOMCL1507	ORTHOMCL1514	ORTHOMCL1508
ORTHOMCL1504	ORTHOMCL1554	ORTHOMCL1504	ORTHOMCL1569	ORTHOMCL1508	ORTHOMCL1516	ORTHOMCL1515	ORTHOMCL1512	ORTHOMCL1508	ORTHOMCL1515	ORTHOMCL1509
ORTHOMCL1505	ORTHOMCL1555	ORTHOMCL1505	ORTHOMCL1570	ORTHOMCL1509	ORTHOMCL1517	ORTHOMCL1516	ORTHOMCL1513	ORTHOMCL1509	ORTHOMCL1516	ORTHOMCL1510
ORTHOMCL1506	ORTHOMCL1556	ORTHOMCL1506	ORTHOMCL1571	ORTHOMCL1510	ORTHOMCL1518	ORTHOMCL1517	ORTHOMCL1514	ORTHOMCL1510	ORTHOMCL1517	ORTHOMCL1511
ORTHOMCL1507	ORTHOMCL1557	ORTHOMCL1507	ORTHOMCL1572	ORTHOMCL1511	ORTHOMCL1519	ORTHOMCL1518	ORTHOMCL1515	ORTHOMCL1511	ORTHOMCL1518	ORTHOMCL1512
ORTHOMCL1508	ORTHOMCL1558	ORTHOMCL1508	ORTHOMCL1573	ORTHOMCL1512	ORTHOMCL1520	ORTHOMCL1519	ORTHOMCL1516	ORTHOMCL1512	ORTHOMCL1519	ORTHOMCL1514
ORTHOMCL1509	ORTHOMCL1559	ORTHOMCL1509	ORTHOMCL1574	ORTHOMCL1513	ORTHOMCL1521	ORTHOMCL1520	ORTHOMCL1517	ORTHOMCL1513	ORTHOMCL1520	ORTHOMCL1515
ORTHOMCL1511	ORTHOMCL1560	ORTHOMCL1510	ORTHOMCL1575	ORTHOMCL1514	ORTHOMCL1522	ORTHOMCL1521	ORTHOMCL1518	ORTHOMCL1514	ORTHOMCL1521	ORTHOMCL1516
ORTHOMCL1512	ORTHOMCL1561	ORTHOMCL1511	ORTHOMCL1576	ORTHOMCL1515	ORTHOMCL1523	ORTHOMCL1522	ORTHOMCL1520	ORTHOMCL1515	ORTHOMCL1522	ORTHOMCL1517
ORTHOMCL1513	ORTHOMCL1562	ORTHOMCL1512	ORTHOMCL1577	ORTHOMCL1516	ORTHOMCL1524	ORTHOMCL1523	ORTHOMCL1521	ORTHOMCL1516	ORTHOMCL1523	ORTHOMCL1518
ORTHOMCL1514	ORTHOMCL1563	ORTHOMCL1513	ORTHOMCL1578	ORTHOMCL1517	ORTHOMCL1525	ORTHOMCL1524	ORTHOMCL1522	ORTHOMCL1517	ORTHOMCL1524	ORTHOMCL1520
ORTHOMCL1515	ORTHOMCL1565	ORTHOMCL1514	ORTHOMCL1579	ORTHOMCL1518	ORTHOMCL1526	ORTHOMCL1525	ORTHOMCL1523	ORTHOMCL1518	ORTHOMCL1525	ORTHOMCL1521
ORTHOMCL1516	ORTHOMCL1566	ORTHOMCL1515	ORTHOMCL1580	ORTHOMCL1519	ORTHOMCL1527	ORTHOMCL1526	ORTHOMCL1524	ORTHOMCL1519	ORTHOMCL1526	ORTHOMCL1522
ORTHOMCL1517	ORTHOMCL1567	ORTHOMCL1516	ORTHOMCL1581	ORTHOMCL1520	ORTHOMCL1528	ORTHOMCL1527	ORTHOMCL1525	ORTHOMCL1520	ORTHOMCL1527	ORTHOMCL1523
ORTHOMCL1518	ORTHOMCL1568	ORTHOMCL1517	ORTHOMCL1582	ORTHOMCL1521	ORTHOMCL1529	ORTHOMCL1528	ORTHOMCL1526	ORTHOMCL1521	ORTHOMCL1528	ORTHOMCL1524
ORTHOMCL1520	ORTHOMCL1569	ORTHOMCL1518	ORTHOMCL1583	ORTHOMCL1522	ORTHOMCL1530	ORTHOMCL1529	ORTHOMCL1527	ORTHOMCL1522	ORTHOMCL1529	ORTHOMCL1525
ORTHOMCL1521	ORTHOMCL1570	ORTHOMCL1519	ORTHOMCL1584	ORTHOMCL1523	ORTHOMCL1531	ORTHOMCL1530	ORTHOMCL1528	ORTHOMCL1523	ORTHOMCL1530	ORTHOMCL1526
ORTHOMCL1522	ORTHOMCL1571	ORTHOMCL1520	ORTHOMCL1585	ORTHOMCL1524	ORTHOMCL1532	ORTHOMCL1531	ORTHOMCL1529	ORTHOMCL1524	ORTHOMCL1531	ORTHOMCL1527
ORTHOMCL1523	ORTHOMCL1572	ORTHOMCL1521	ORTHOMCL1586	ORTHOMCL1525	ORTHOMCL1533	ORTHOMCL1532	ORTHOMCL1530	ORTHOMCL1525	ORTHOMCL1532	ORTHOMCL1528
ORTHOMCL1524	ORTHOMCL1573	ORTHOMCL1522	ORTHOMCL1587	ORTHOMCL1526	ORTHOMCL1534	ORTHOMCL1533	ORTHOMCL1531	ORTHOMCL1526	ORTHOMCL1533	ORTHOMCL1529
ORTHOMCL1525	ORTHOMCL1574	ORTHOMCL1523	ORTHOMCL1588	ORTHOMCL1527	ORTHOMCL1535	ORTHOMCL1534	ORTHOMCL1532	ORTHOMCL1527	ORTHOMCL1535	ORTHOMCL1530
ORTHOMCL1526	ORTHOMCL1575	ORTHOMCL1524	ORTHOMCL1589	ORTHOMCL1528	ORTHOMCL1536	ORTHOMCL1535	ORTHOMCL1533	ORTHOMCL1528	ORTHOMCL1536	ORTHOMCL1531
ORTHOMCL1527	ORTHOMCL1576	ORTHOMCL1525	ORTHOMCL1590	ORTHOMCL1529	ORTHOMCL1537	ORTHOMCL1536	ORTHOMCL1534	ORTHOMCL1529	ORTHOMCL1537	ORTHOMCL1532
ORTHOMCL1528	ORTHOMCL1577	ORTHOMCL1526	ORTHOMCL1591	ORTHOMCL1530	ORTHOMCL1538	ORTHOMCL1537	ORTHOMCL1535	ORTHOMCL1530	ORTHOMCL1538	ORTHOMCL1533
ORTHOMCL1529	ORTHOMCL1578	ORTHOMCL1527	ORTHOMCL1592	ORTHOMCL1531	ORTHOMCL1539	ORTHOMCL1538	ORTHOMCL1536	ORTHOMCL1531	ORTHOMCL1539	ORTHOMCL1534
ORTHOMCL1530	ORTHOMCL1579	ORTHOMCL1528	ORTHOMCL1593	ORTHOMCL1532	ORTHOMCL1540	ORTHOMCL1540	ORTHOMCL1537	ORTHOMCL1532	ORTHOMCL1540	ORTHOMCL1535
ORTHOMCL1531	ORTHOMCL1580	ORTHOMCL1529	ORTHOMCL1594	ORTHOMCL1533	ORTHOMCL1541	ORTHOMCL1541	ORTHOMCL1538	ORTHOMCL1533	ORTHOMCL1541	ORTHOMCL1536
ORTHOMCL1532	ORTHOMCL1581	ORTHOMCL1530	ORTHOMCL1595	ORTHOMCL1534	ORTHOMCL1542	ORTHOMCL1542	ORTHOMCL1539	ORTHOMCL1534	ORTHOMCL1542	ORTHOMCL1537
ORTHOMCL1533	ORTHOMCL1582	ORTHOMCL1531	ORTHOMCL1596	ORTHOMCL1535	ORTHOMCL1543	ORTHOMCL1543	ORTHOMCL1540	ORTHOMCL1535	ORTHOMCL1543	ORTHOMCL1538
ORTHOMCL1534	ORTHOMCL1583	ORTHOMCL1532	ORTHOMCL1597	ORTHOMCL1536	ORTHOMCL1544	ORTHOMCL1544	ORTHOMCL1541	ORTHOMCL1536	ORTHOMCL1544	ORTHOMCL1539
ORTHOMCL1535	ORTHOMCL1584	ORTHOMCL1533	ORTHOMCL1598	ORTHOMCL1537	ORTHOMCL1545	ORTHOMCL1545	ORTHOMCL1542	ORTHOMCL1537	ORTHOMCL1545	ORTHOMCL1540
ORTHOMCL1536	ORTHOMCL1585	ORTHOMCL1534	ORTHOMCL1599	ORTHOMCL1538	ORTHOMCL1547	ORTHOMCL1546	ORTHOMCL1543	ORTHOMCL1538	ORTHOMCL1547	ORTHOMCL1541
ORTHOMCL1537	ORTHOMCL1586	ORTHOMCL1535	ORTHOMCL1600	ORTHOMCL1539	ORTHOMCL1548	ORTHOMCL1547	ORTHOMCL1544	ORTHOMCL1539	ORTHOMCL1548	ORTHOMCL1542
ORTHOMCL1538	ORTHOMCL1587	ORTHOMCL1536	ORTHOMCL1601	ORTHOMCL1540	ORTHOMCL1549	ORTHOMCL1548	ORTHOMCL1545	ORTHOMCL1540	ORTHOMCL1549	ORTHOMCL1543
ORTHOMCL1539	ORTHOMCL1588	ORTHOMCL1537	ORTHOMCL1602	ORTHOMCL1541	ORTHOMCL1550	ORTHOMCL1549	ORTHOMCL1546	ORTHOMCL1541	ORTHOMCL1550	ORTHOMCL1544
ORTHOMCL1540	ORTHOMCL1589	ORTHOMCL1538	ORTHOMCL1603	ORTHOMCL1542	ORTHOMCL1551	ORTHOMCL1550	ORTHOMCL1547	ORTHOMCL1542	ORTHOMCL1551	ORTHOMCL1545
ORTHOMCL1541	ORTHOMCL1590	ORTHOMCL1539	ORTHOMCL1604	ORTHOMCL1543	ORTHOMCL1552	ORTHOMCL1551	ORTHOMCL1548	ORTHOMCL1543	ORTHOMCL1552	ORTHOMCL1547
ORTHOMCL1542	ORTHOMCL1592	ORTHOMCL1540	ORTHOMCL1605	ORTHOMCL1544	ORTHOMCL1553	ORTHOMCL1552	ORTHOMCL1549	ORTHOMCL1544	ORTHOMCL1553	ORTHOMCL1548
ORTHOMCL1543	ORTHOMCL1593	ORTHOMCL1541	ORTHOMCL1606	ORTHOMCL1545	ORTHOMCL1554	ORTHOMCL1553	ORTHOMCL1550	ORTHOMCL1545	ORTHOMCL1554	ORTHOMCL1549
ORTHOMCL1544	ORTHOMCL1594	ORTHOMCL1542	ORTHOMCL1607	ORTHOMCL1546	ORTHOMCL1555	ORTHOMCL1554	ORTHOMCL1551	ORTHOMCL1546	ORTHOMCL1555	ORTHOMCL1550
ORTHOMCL1545	ORTHOMCL1595	ORTHOMCL1543	ORTHOMCL1608	ORTHOMCL1547	ORTHOMCL1556	ORTHOMCL1555	ORTHOMCL1552	ORTHOMCL1547	ORTHOMCL1556	ORTHOMCL1551
ORTHOMCL1546	ORTHOMCL1596	ORTHOMCL1544	ORTHOMCL1609	ORTHOMCL1548	ORTHOMCL1557	ORTHOMCL1556	ORTHOMCL1553	ORTHOMCL1548	ORTHOMCL1557	ORTHOMCL1552
ORTHOMCL1547	ORTHOMCL1597	ORTHOMCL1545	ORTHOMCL1610	ORTHOMCL1549	ORTHOMCL1558	ORTHOMCL1557	ORTHOMCL1554	ORTHOMCL1549	ORTHOMCL1558	ORTHOMCL1553
ORTHOMCL1548	ORTHOMCL1598	ORTHOMCL1546	ORTHOMCL1611	ORTHOMCL1550	ORTHOMCL1559	ORTHOMCL1558	ORTHOMCL1555	ORTHOMCL1550	ORTHOMCL1559	ORTHOMCL1554
ORTHOMCL1549	ORTHOMCL1599	ORTHOMCL1547	ORTHOMCL1612	ORTHOMCL1551	ORTHOMCL1560	ORTHOMCL1559	ORTHOMCL1556	ORTHOMCL1551	ORTHOMCL1560	ORTHOMCL1555
ORTHOMCL1550	ORTHOMCL1600	ORTHOMCL1548	ORTHOMCL1613	ORTHOMCL1552	ORTHOMCL1561	ORTHOMCL1560	ORTHOMCL1557	ORTHOMCL1552	ORTHOMCL1561	ORTHOMCL1556
ORTHOMCL1551	ORTHOMCL1601	ORTHOMCL1550	ORTHOMCL1614	ORTHOMCL1553	ORTHOMCL1562	ORTHOMCL1561	ORTHOMCL1558	ORTHOMCL1553	ORTHOMCL1562	ORTHOMCL1557
ORTHOMCL1552	ORTHOMCL1602	ORTHOMCL1551	ORTHOMCL1615	ORTHOMCL1554	ORTHOMCL1563	ORTHOMCL1562	ORTHOMCL1559	ORTHOMCL1555	ORTHOMCL1563	ORTHOMCL1558
ORTHOMCL1553	ORTHOMCL1603	ORTHOMCL1552	ORTHOMCL1616	ORTHOMCL1555	ORTHOMCL1564	ORTHOMCL1563	ORTHOMCL1560	ORTHOMCL1556	ORTHOMCL1564	ORTHOMCL1559
ORTHOMCL1554	ORTHOMCL1604	ORTHOMCL1553	ORTHOMCL1617	ORTHOMCL1556	ORTHOMCL1565	ORTHOMCL1564	ORTHOMCL1561	ORTHOMCL1557	ORTHOMCL1565	ORTHOMCL1560
ORTHOMCL1555	ORTHOMCL1605	ORTHOMCL1554	ORTHOMCL1618	ORTHOMCL1557	ORTHOMCL1566	ORTHOMCL1565	ORTHOMCL1562	ORTHOMCL1558	ORTHOMCL1566	ORTHOMCL1561
ORTHOMCL1556	ORTHOMCL1608	ORTHOMCL1555	ORTHOMCL1619	ORTHOMCL1558	ORTHOMCL1567	ORTHOMCL1566	ORTHOMCL1563	ORTHOMCL1560	ORTHOMCL1567	ORTHOMCL1562
ORTHOMCL1557	ORTHOMCL1609	ORTHOMCL1556	ORTHOMCL1620	ORTHOMCL1559	ORTHOMCL1568	ORTHOMCL1567	ORTHOMCL1564	ORTHOMCL1561	ORTHOMCL1568	ORTHOMCL1563
ORTHOMCL1558	ORTHOMCL1610	ORTHOMCL1557	ORTHOMCL1621	ORTHOMCL1560	ORTHOMCL1569	ORTHOMCL1568	ORTHOMCL1565	ORTHOMCL1562	ORTHOMCL1569	ORTHOMCL1564
ORTHOMCL1559	ORTHOMCL1611	ORTHOMCL1558	ORTHOMCL1622	ORTHOMCL1561	ORTHOMCL1570	ORTHOMCL1569	ORTHOMCL1566	ORTHOMCL1563	ORTHOMCL1570	ORTHOMCL1565
ORTHOMCL1560	ORTHOMCL1612	ORTHOMCL1560	ORTHOMCL1623	ORTHOMCL1562	ORTHOMCL1571	ORTHOMCL1570	ORTHOMCL1567	ORTHOMCL1564	ORTHOMCL1571	ORTHOMCL1566
ORTHOMCL1561	ORTHOMCL1614	ORTHOMCL1561	ORTHOMCL1624	ORTHOMCL1563	ORTHOMCL1572	ORTHOMCL1571	ORTHOMCL1568	ORTHOMCL1565	ORTHOMCL1572	ORTHOMCL1567
ORTHOMCL1562	ORTHOMCL1615	ORTHOMCL1562	ORTHOMCL1625	ORTHOMCL1564	ORTHOMCL1573	ORTHOMCL1572	ORTHOMCL1569	ORTHOMCL1566	ORTHOMCL1573	ORTHOMCL1568
ORTHOMCL1563	ORTHOMCL1616	ORTHOMCL1563	ORTHOMCL1626	ORTHOMCL1565	ORTHOMCL1575	ORTHOMCL1573	ORTHOMCL1570	ORTHOMCL1567	ORTHOMCL1574	ORTHOMCL1569
ORTHOMCL1564	ORTHOMCL1617	ORTHOMCL1564	ORTHOMCL1627	ORTHOMCL1566	ORTHOMCL1576	ORTHOMCL1574	ORTHOMCL1571	ORTHOMCL1568	ORTHOMCL1575	ORTHOMCL1570
ORTHOMCL1565	ORTHOMCL1618	ORTHOMCL1565	ORTHOMCL1628	ORTHOMCL1567	ORTHOMCL1577	ORTHOMCL1575	ORTHOMCL1572	ORTHOMCL1569	ORTHOMCL1576	ORTHOMCL1571
ORTHOMCL1566	ORTHOMCL1619	ORTHOMCL1566	ORTHOMCL1629	ORTHOMCL1568	ORTHOMCL1578	ORTHOMCL1576	ORTHOMCL1573	ORTHOMCL1570	ORTHOMCL1577	ORTHOMCL1572
ORTHOMCL1567	ORTHOMCL1620	ORTHOMCL1567	ORTHOMCL1630	ORTHOMCL1569	ORTHOMCL1579	ORTHOMCL1577	ORTHOMCL1574	ORTHOMCL1571	ORTHOMCL1578	ORTHOMCL1573
ORTHOMCL1568	ORTHOMCL1621	ORTHOMCL1569	ORTHOMCL1631	ORTHOMCL1570	ORTHOMCL1580	ORTHOMCL1578	ORTHOMCL1575	ORTHOMCL1572	ORTHOMCL1579	ORTHOMCL1574
ORTHOMCL1569	ORTHOMCL1622	ORTHOMCL1570	ORTHOMCL1633	ORTHOMCL1571	ORTHOMCL1581	ORTHOMCL1579	ORTHOMCL1576	ORTHOMCL1573	ORTHOMCL1580	ORTHOMCL1575
ORTHOMCL1570	ORTHOMCL1623	ORTHOMCL1571	ORTHOMCL1634	ORTHOMCL1572	ORTHOMCL1582	ORTHOMCL1580	ORTHOMCL1577	ORTHOMCL1574	ORTHOMCL1581	ORTHOMCL1576
ORTHOMCL1571	ORTHOMCL1624	ORTHOMCL1572	ORTHOMCL1635	ORTHOMCL1573	ORTHOMCL1583	ORTHOMCL1581	ORTHOMCL1578	ORTHOMCL1575	ORTHOMCL1582	ORTHOMCL1577
ORTHOMCL1572	ORTHOMCL1625	ORTHOMCL1573	ORTHOMCL1636	ORTHOMCL1574	ORTHOMCL1584	ORTHOMCL1582	ORTHOMCL1579	ORTHOMCL1576	ORTHOMCL1583	ORTHOMCL1578
ORTHOMCL1573	ORTHOMCL1627	ORTHOMCL1574	ORTHOMCL1637	ORTHOMCL1575	ORTHOMCL1585	ORTHOMCL1583	ORTHOMCL1580	ORTHOMCL1577	ORTHOMCL1584	ORTHOMCL1579
ORTHOMCL1574	ORTHOMCL1628	ORTHOMCL1575	ORTHOMCL1638	ORTHOMCL1576	ORTHOMCL1586	ORTHOMCL1584	ORTHOMCL1581	ORTHOMCL1578	ORTHOMCL1585	ORTHOMCL1580
ORTHOMCL1575	ORTHOMCL1629	ORTHOMCL1576	ORTHOMCL1639	ORTHOMCL1577	ORTHOMCL1587	ORTHOMCL1585	ORTHOMCL1582	ORTHOMCL1579	ORTHOMCL1586	ORTHOMCL1581
ORTHOMCL1576	ORTHOMCL1630	ORTHOMCL1577	ORTHOMCL1640	ORTHOMCL1578	ORTHOMCL1588	ORTHOMCL1586	ORTHOMCL1583	ORTHOMCL1580	ORTHOMCL1587	ORTHOMCL1582
ORTHOMCL1577	ORTHOMCL1631	ORTHOMCL1578	ORTHOMCL1641	ORTHOMCL1579	ORTHOMCL1589	ORTHOMCL1587	ORTHOMCL1584	ORTHOMCL1581	ORTHOMCL1588	ORTHOMCL1583
ORTHOMCL1578	ORTHOMCL1632	ORTHOMCL1579	ORTHOMCL1642	ORTHOMCL1580	ORTHOMCL1590	ORTHOMCL1588	ORTHOMCL1585	ORTHOMCL1582	ORTHOMCL1589	ORTHOMCL1584
ORTHOMCL1579	ORTHOMCL1633	ORTHOMCL1580	ORTHOMCL1643	ORTHOMCL1581	ORTHOMCL1591	ORTHOMCL1589	ORTHOMCL1586	ORTHOMCL1583	ORTHOMCL1590	ORTHOMCL1585
ORTHOMCL1580	ORTHOMCL1634	ORTHOMCL1581	ORTHOMCL1644	ORTHOMCL1582	ORTHOMCL1592	ORTHOMCL1590	ORTHOMCL1587	ORTHOMCL1584	ORTHOMCL1591	ORTHOMCL1586
ORTHOMCL1581	ORTHOMCL1635	ORTHOMCL1582	ORTHOMCL1645	ORTHOMCL1583	ORTHOMCL1593	ORTHOMCL1591	ORTHOMCL1588	ORTHOMCL1585	ORTHOMCL1592	ORTHOMCL1587
ORTHOMCL1583	ORTHOMCL1637	ORTHOMCL1583	ORTHOMCL1646	ORTHOMCL1584	ORTHOMCL1594	ORTHOMCL1592	ORTHOMCL1589	ORTHOMCL1586	ORTHOMCL1593	ORTHOMCL1588
ORTHOMCL1584	ORTHOMCL1638	ORTHOMCL1584	ORTHOMCL1647	ORTHOMCL1585	ORTHOMCL1595	ORTHOMCL1593	ORTHOMCL1590	ORTHOMCL1587	ORTHOMCL1594	ORTHOMCL1589
ORTHOMCL1585	ORTHOMCL1639	ORTHOMCL1585	ORTHOMCL1648	ORTHOMCL1586	ORTHOMCL1596	ORTHOMCL1594	ORTHOMCL1591	ORTHOMCL1588	ORTHOMCL1595	ORTHOMCL1590
ORTHOMCL1586	ORTHOMCL1640	ORTHOMCL1586	ORTHOMCL1649	ORTHOMCL1587	ORTHOMCL1597	ORTHOMCL1595	ORTHOMCL1592	ORTHOMCL1589	ORTHOMCL1596	ORTHOMCL1591
ORTHOMCL1587	ORTHOMCL1641	ORTHOMCL1587	ORTHOMCL1650	ORTHOMCL1588	ORTHOMCL1598	ORTHOMCL1596	ORTHOMCL1593	ORTHOMCL1590	ORTHOMCL1597	ORTHOMCL1592
ORTHOMCL1588	ORTHOMCL1642	ORTHOMCL1588	ORTHOMCL1652	ORTHOMCL1589	ORTHOMCL1599	ORTHOMCL1597	ORTHOMCL1594	ORTHOMCL1591	ORTHOMCL1598	ORTHOMCL1593
ORTHOMCL1589	ORTHOMCL1643	ORTHOMCL1589	ORTHOMCL1653	ORTHOMCL1590	ORTHOMCL1600	ORTHOMCL1598	ORTHOMCL1595	ORTHOMCL1592	ORTHOMCL1599	ORTHOMCL1594
ORTHOMCL1590	ORTHOMCL1644	ORTHOMCL1590	ORTHOMCL1654	ORTHOMCL1591	ORTHOMCL1601	ORTHOMCL1599	ORTHOMCL1596	ORTHOMCL1593	ORTHOMCL1600	ORTHOMCL1595
ORTHOMCL1591	ORTHOMCL1645	ORTHOMCL1592	ORTHOMCL1655	ORTHOMCL1592	ORTHOMCL1602	ORTHOMCL1600	ORTHOMCL1597	ORTHOMCL1594	ORTHOMCL1601	ORTHOMCL1596
ORTHOMCL1592	ORTHOMCL1646	ORTHOMCL1593	ORTHOMCL1656	ORTHOMCL1593	ORTHOMCL1603	ORTHOMCL1601	ORTHOMCL1598	ORTHOMCL1595	ORTHOMCL1602	ORTHOMCL1597
ORTHOMCL1593	ORTHOMCL1647	ORTHOMCL1594	ORTHOMCL1657	ORTHOMCL1594	ORTHOMCL1604	ORTHOMCL1602	ORTHOMCL1599	ORTHOMCL1596	ORTHOMCL1603	ORTHOMCL1598
ORTHOMCL1594	ORTHOMCL1648	ORTHOMCL1595	ORTHOMCL1658	ORTHOMCL1595	ORTHOMCL1605	ORTHOMCL1603	ORTHOMCL1600	ORTHOMCL1597	ORTHOMCL1604	ORTHOMCL1599
ORTHOMCL1595	ORTHOMCL1649	ORTHOMCL1596	ORTHOMCL1659	ORTHOMCL1596	ORTHOMCL1606	ORTHOMCL1604	ORTHOMCL1601	ORTHOMCL1598	ORTHOMCL1605	ORTHOMCL1600
ORTHOMCL1596	ORTHOMCL1650	ORTHOMCL1597	ORTHOMCL1660	ORTHOMCL1597	ORTHOMCL1607	ORTHOMCL1605	ORTHOMCL1602	ORTHOMCL1600	ORTHOMCL1606	ORTHOMCL1601
ORTHOMCL1597	ORTHOMCL1651	ORTHOMCL1598	ORTHOMCL1661	ORTHOMCL1598	ORTHOMCL1608	ORTHOMCL1606	ORTHOMCL1603	ORTHOMCL1601	ORTHOMCL1607	ORTHOMCL1602
ORTHOMCL1598	ORTHOMCL1652	ORTHOMCL1599	ORTHOMCL1662	ORTHOMCL1599	ORTHOMCL1609	ORTHOMCL1607	ORTHOMCL1604	ORTHOMCL1602	ORTHOMCL1608	ORTHOMCL1603
ORTHOMCL1599	ORTHOMCL1653	ORTHOMCL1600	ORTHOMCL1663	ORTHOMCL1600	ORTHOMCL1610	ORTHOMCL1608	ORTHOMCL1605	ORTHOMCL1603	ORTHOMCL1609	ORTHOMCL1604
ORTHOMCL1600	ORTHOMCL1654	ORTHOMCL1601	ORTHOMCL1664	ORTHOMCL1601	ORTHOMCL1611	ORTHOMCL1609	ORTHOMCL1606	ORTHOMCL1604	ORTHOMCL1610	ORTHOMCL1605
ORTHOMCL1601	ORTHOMCL1655	ORTHOMCL1602	ORTHOMCL1665	ORTHOMCL1602	ORTHOMCL1612	ORTHOMCL1610	ORTHOMCL1607	ORTHOMCL1605	ORTHOMCL1611	ORTHOMCL1606
ORTHOMCL1602	ORTHOMCL1656	ORTHOMCL1603	ORTHOMCL1666	ORTHOMCL1603	ORTHOMCL1613	ORTHOMCL1611	ORTHOMCL1608	ORTHOMCL1606	ORTHOMCL1612	ORTHOMCL1608
ORTHOMCL1603	ORTHOMCL1657	ORTHOMCL1604	ORTHOMCL1667	ORTHOMCL1604	ORTHOMCL1614	ORTHOMCL1612	ORTHOMCL1609	ORTHOMCL1607	ORTHOMCL1613	ORTHOMCL1609
ORTHOMCL1604	ORTHOMCL1658	ORTHOMCL1605	ORTHOMCL1668	ORTHOMCL1605	ORTHOMCL1615	ORTHOMCL1613	ORTHOMCL1610	ORTHOMCL1608	ORTHOMCL1614	ORTHOMCL1610
ORTHOMCL1605	ORTHOMCL1659	ORTHOMCL1606	ORTHOMCL1669	ORTHOMCL1606	ORTHOMCL1616	ORTHOMCL1614	ORTHOMCL1611	ORTHOMCL1609	ORTHOMCL1615	ORTHOMCL1611
ORTHOMCL1606	ORTHOMCL1660	ORTHOMCL1607	ORTHOMCL1670	ORTHOMCL1607	ORTHOMCL1617	ORTHOMCL1615	ORTHOMCL1613	ORTHOMCL1610	ORTHOMCL1616	ORTHOMCL1612
ORTHOMCL1608	ORTHOMCL1661	ORTHOMCL1608	ORTHOMCL1671	ORTHOMCL1608	ORTHOMCL1618	ORTHOMCL1616	ORTHOMCL1614	ORTHOMCL1611	ORTHOMCL1617	ORTHOMCL1613
ORTHOMCL1609	ORTHOMCL1662	ORTHOMCL1609	ORTHOMCL1672	ORTHOMCL1609	ORTHOMCL1619	ORTHOMCL1617	ORTHOMCL1615	ORTHOMCL1612	ORTHOMCL1618	ORTHOMCL1614
ORTHOMCL1610	ORTHOMCL1663	ORTHOMCL1610	ORTHOMCL1673	ORTHOMCL1610	ORTHOMCL1620	ORTHOMCL1618	ORTHOMCL1616	ORTHOMCL1613	ORTHOMCL1619	ORTHOMCL1615
ORTHOMCL1611	ORTHOMCL1664	ORTHOMCL1611	ORTHOMCL1674	ORTHOMCL1611	ORTHOMCL1621	ORTHOMCL1619	ORTHOMCL1617	ORTHOMCL1614	ORTHOMCL1620	ORTHOMCL1616
ORTHOMCL1612	ORTHOMCL1665	ORTHOMCL1612	ORTHOMCL1675	ORTHOMCL1612	ORTHOMCL1622	ORTHOMCL1620	ORTHOMCL1618	ORTHOMCL1615	ORTHOMCL1621	ORTHOMCL1617
ORTHOMCL1613	ORTHOMCL1666	ORTHOMCL1613	ORTHOMCL1676	ORTHOMCL1613	ORTHOMCL1623	ORTHOMCL1621	ORTHOMCL1619	ORTHOMCL1616	ORTHOMCL1622	ORTHOMCL1618
ORTHOMCL1614	ORTHOMCL1667	ORTHOMCL1614	ORTHOMCL1677	ORTHOMCL1614	ORTHOMCL1624	ORTHOMCL1622	ORTHOMCL1620	ORTHOMCL1617	ORTHOMCL1623	ORTHOMCL1619
ORTHOMCL1615	ORTHOMCL1668	ORTHOMCL1615	ORTHOMCL1678	ORTHOMCL1615	ORTHOMCL1625	ORTHOMCL1624	ORTHOMCL1621	ORTHOMCL1618	ORTHOMCL1624	ORTHOMCL1620
ORTHOMCL1616	ORTHOMCL1669	ORTHOMCL1616	ORTHOMCL1679	ORTHOMCL1616	ORTHOMCL1626	ORTHOMCL1625	ORTHOMCL1622	ORTHOMCL1619	ORTHOMCL1625	ORTHOMCL1621
ORTHOMCL1617	ORTHOMCL1670	ORTHOMCL1617	ORTHOMCL1680	ORTHOMCL1617	ORTHOMCL1627	ORTHOMCL1626	ORTHOMCL1623	ORTHOMCL1620	ORTHOMCL1626	ORTHOMCL1622
ORTHOMCL1618	ORTHOMCL1671	ORTHOMCL1618	ORTHOMCL1681	ORTHOMCL1618	ORTHOMCL1628	ORTHOMCL1627	ORTHOMCL1624	ORTHOMCL1621	ORTHOMCL1627	ORTHOMCL1623
ORTHOMCL1619	ORTHOMCL1672	ORTHOMCL1619	ORTHOMCL1682	ORTHOMCL1619	ORTHOMCL1629	ORTHOMCL1628	ORTHOMCL1625	ORTHOMCL1622	ORTHOMCL1628	ORTHOMCL1624
ORTHOMCL1620	ORTHOMCL1673	ORTHOMCL1620	ORTHOMCL1683	ORTHOMCL1620	ORTHOMCL1630	ORTHOMCL1629	ORTHOMCL1626	ORTHOMCL1623	ORTHOMCL1629	ORTHOMCL1625
ORTHOMCL1621	ORTHOMCL1674	ORTHOMCL1621	ORTHOMCL1684	ORTHOMCL1621	ORTHOMCL1631	ORTHOMCL1630	ORTHOMCL1627	ORTHOMCL1624	ORTHOMCL1630	ORTHOMCL1626
ORTHOMCL1622	ORTHOMCL1675	ORTHOMCL1622	ORTHOMCL1685	ORTHOMCL1622	ORTHOMCL1632	ORTHOMCL1631	ORTHOMCL1628	ORTHOMCL1625	ORTHOMCL1631	ORTHOMCL1627
ORTHOMCL1623	ORTHOMCL1676	ORTHOMCL1624	ORTHOMCL1686	ORTHOMCL1623	ORTHOMCL1633	ORTHOMCL1632	ORTHOMCL1629	ORTHOMCL1626	ORTHOMCL1632	ORTHOMCL1628
ORTHOMCL1624	ORTHOMCL1677	ORTHOMCL1625	ORTHOMCL1687	ORTHOMCL1624	ORTHOMCL1634	ORTHOMCL1633	ORTHOMCL1630	ORTHOMCL1627	ORTHOMCL1633	ORTHOMCL1629
ORTHOMCL1625	ORTHOMCL1678	ORTHOMCL1626	ORTHOMCL1688	ORTHOMCL1625	ORTHOMCL1635	ORTHOMCL1634	ORTHOMCL1631	ORTHOMCL1628	ORTHOMCL1634	ORTHOMCL1630
ORTHOMCL1626	ORTHOMCL1679	ORTHOMCL1627	ORTHOMCL1689	ORTHOMCL1626	ORTHOMCL1636	ORTHOMCL1635	ORTHOMCL1632	ORTHOMCL1629	ORTHOMCL1635	ORTHOMCL1631
ORTHOMCL1627	ORTHOMCL1680	ORTHOMCL1628	ORTHOMCL1690	ORTHOMCL1627	ORTHOMCL1637	ORTHOMCL1636	ORTHOMCL1633	ORTHOMCL1630	ORTHOMCL1636	ORTHOMCL1632
ORTHOMCL1628	ORTHOMCL1681	ORTHOMCL1629	ORTHOMCL1691	ORTHOMCL1628	ORTHOMCL1638	ORTHOMCL1637	ORTHOMCL1634	ORTHOMCL1631	ORTHOMCL1637	ORTHOMCL1633
ORTHOMCL1629	ORTHOMCL1682	ORTHOMCL1630	ORTHOMCL1692	ORTHOMCL1629	ORTHOMCL1639	ORTHOMCL1638	ORTHOMCL1635	ORTHOMCL1632	ORTHOMCL1638	ORTHOMCL1634
ORTHOMCL1630	ORTHOMCL1683	ORTHOMCL1631	ORTHOMCL1693	ORTHOMCL1630	ORTHOMCL1640	ORTHOMCL1639	ORTHOMCL1636	ORTHOMCL1633	ORTHOMCL1639	ORTHOMCL1635
ORTHOMCL1631	ORTHOMCL1684	ORTHOMCL1632	ORTHOMCL1694	ORTHOMCL1631	ORTHOMCL1641	ORTHOMCL1640	ORTHOMCL1637	ORTHOMCL1634	ORTHOMCL1640	ORTHOMCL1636
ORTHOMCL1632	ORTHOMCL1685	ORTHOMCL1634	ORTHOMCL1695	ORTHOMCL1632	ORTHOMCL1642	ORTHOMCL1641	ORTHOMCL1638	ORTHOMCL1635	ORTHOMCL1641	ORTHOMCL1637
ORTHOMCL1633	ORTHOMCL1686	ORTHOMCL1635	ORTHOMCL1696	ORTHOMCL1634	ORTHOMCL1643	ORTHOMCL1642	ORTHOMCL1639	ORTHOMCL1636	ORTHOMCL1642	ORTHOMCL1638
ORTHOMCL1634	ORTHOMCL1687	ORTHOMCL1636	ORTHOMCL1697	ORTHOMCL1635	ORTHOMCL1644	ORTHOMCL1643	ORTHOMCL1640	ORTHOMCL1637	ORTHOMCL1643	ORTHOMCL1639
ORTHOMCL1635	ORTHOMCL1688	ORTHOMCL1637	ORTHOMCL1698	ORTHOMCL1636	ORTHOMCL1645	ORTHOMCL1644	ORTHOMCL1641	ORTHOMCL1638	ORTHOMCL1644	ORTHOMCL1640
ORTHOMCL1636	ORTHOMCL1689	ORTHOMCL1638	ORTHOMCL1699	ORTHOMCL1637	ORTHOMCL1646	ORTHOMCL1645	ORTHOMCL1642	ORTHOMCL1639	ORTHOMCL1645	ORTHOMCL1641
ORTHOMCL1637	ORTHOMCL1690	ORTHOMCL1639	ORTHOMCL1700	ORTHOMCL1638	ORTHOMCL1647	ORTHOMCL1646	ORTHOMCL1643	ORTHOMCL1640	ORTHOMCL1646	ORTHOMCL1642
ORTHOMCL1638	ORTHOMCL1691	ORTHOMCL1640	ORTHOMCL1701	ORTHOMCL1639	ORTHOMCL1648	ORTHOMCL1647	ORTHOMCL1644	ORTHOMCL1641	ORTHOMCL1647	ORTHOMCL1643
ORTHOMCL1639	ORTHOMCL1693	ORTHOMCL1641	ORTHOMCL1702	ORTHOMCL1640	ORTHOMCL1649	ORTHOMCL1648	ORTHOMCL1645	ORTHOMCL1642	ORTHOMCL1648	ORTHOMCL1644
ORTHOMCL1640	ORTHOMCL1694	ORTHOMCL1642	ORTHOMCL1703	ORTHOMCL1641	ORTHOMCL1650	ORTHOMCL1649	ORTHOMCL1646	ORTHOMCL1643	ORTHOMCL1649	ORTHOMCL1645
ORTHOMCL1641	ORTHOMCL1695	ORTHOMCL1643	ORTHOMCL1704	ORTHOMCL1642	ORTHOMCL1651	ORTHOMCL1650	ORTHOMCL1647	ORTHOMCL1644	ORTHOMCL1650	ORTHOMCL1646
ORTHOMCL1642	ORTHOMCL1696	ORTHOMCL1644	ORTHOMCL1705	ORTHOMCL1643	ORTHOMCL1652	ORTHOMCL1651	ORTHOMCL1648	ORTHOMCL1645	ORTHOMCL1651	ORTHOMCL1647
ORTHOMCL1643	ORTHOMCL1697	ORTHOMCL1645	ORTHOMCL1706	ORTHOMCL1644	ORTHOMCL1653	ORTHOMCL1652	ORTHOMCL1649	ORTHOMCL1646	ORTHOMCL1652	ORTHOMCL1648
ORTHOMCL1644	ORTHOMCL1698	ORTHOMCL1646	ORTHOMCL1707	ORTHOMCL1645	ORTHOMCL1654	ORTHOMCL1653	ORTHOMCL1650	ORTHOMCL1647	ORTHOMCL1653	ORTHOMCL1649
ORTHOMCL1645	ORTHOMCL1699	ORTHOMCL1647	ORTHOMCL1708	ORTHOMCL1646	ORTHOMCL1655	ORTHOMCL1654	ORTHOMCL1651	ORTHOMCL1648	ORTHOMCL1654	ORTHOMCL1650
ORTHOMCL1646	ORTHOMCL1700	ORTHOMCL1648	ORTHOMCL1709	ORTHOMCL1647	ORTHOMCL1656	ORTHOMCL1655	ORTHOMCL1652	ORTHOMCL1649	ORTHOMCL1655	ORTHOMCL1651
ORTHOMCL1647	ORTHOMCL1701	ORTHOMCL1649	ORTHOMCL1710	ORTHOMCL1648	ORTHOMCL1657	ORTHOMCL1656	ORTHOMCL1653	ORTHOMCL1650	ORTHOMCL1656	ORTHOMCL1652
ORTHOMCL1648	ORTHOMCL1702	ORTHOMCL1650	ORTHOMCL1711	ORTHOMCL1649	ORTHOMCL1658	ORTHOMCL1657	ORTHOMCL1654	ORTHOMCL1651	ORTHOMCL1657	ORTHOMCL1653
ORTHOMCL1649	ORTHOMCL1703	ORTHOMCL1651	ORTHOMCL1712	ORTHOMCL1650	ORTHOMCL1659	ORTHOMCL1658	ORTHOMCL1655	ORTHOMCL1652	ORTHOMCL1658	ORTHOMCL1654
ORTHOMCL1650	ORTHOMCL1704	ORTHOMCL1652	ORTHOMCL1713	ORTHOMCL1651	ORTHOMCL1660	ORTHOMCL1659	ORTHOMCL1656	ORTHOMCL1653	ORTHOMCL1659	ORTHOMCL1655
ORTHOMCL1651	ORTHOMCL1705	ORTHOMCL1653	ORTHOMCL1714	ORTHOMCL1652	ORTHOMCL1661	ORTHOMCL1660	ORTHOMCL1657	ORTHOMCL1654	ORTHOMCL1660	ORTHOMCL1656
ORTHOMCL1652	ORTHOMCL1706	ORTHOMCL1654	ORTHOMCL1715	ORTHOMCL1653	ORTHOMCL1662	ORTHOMCL1661	ORTHOMCL1658	ORTHOMCL1655	ORTHOMCL1661	ORTHOMCL1657
ORTHOMCL1653	ORTHOMCL1707	ORTHOMCL1655	ORTHOMCL1716	ORTHOMCL1655	ORTHOMCL1663	ORTHOMCL1662	ORTHOMCL1659	ORTHOMCL1656	ORTHOMCL1662	ORTHOMCL1658
ORTHOMCL1654	ORTHOMCL1708	ORTHOMCL1656	ORTHOMCL1717	ORTHOMCL1656	ORTHOMCL1664	ORTHOMCL1663	ORTHOMCL1660	ORTHOMCL1657	ORTHOMCL1663	ORTHOMCL1659
ORTHOMCL1655	ORTHOMCL1709	ORTHOMCL1657	ORTHOMCL1718	ORTHOMCL1657	ORTHOMCL1665	ORTHOMCL1664	ORTHOMCL1661	ORTHOMCL1658	ORTHOMCL1664	ORTHOMCL1660
ORTHOMCL1656	ORTHOMCL1710	ORTHOMCL1658	ORTHOMCL1719	ORTHOMCL1658	ORTHOMCL1666	ORTHOMCL1665	ORTHOMCL1662	ORTHOMCL1659	ORTHOMCL1665	ORTHOMCL1661
ORTHOMCL1657	ORTHOMCL1711	ORTHOMCL1659	ORTHOMCL1720	ORTHOMCL1659	ORTHOMCL1667	ORTHOMCL1666	ORTHOMCL1663	ORTHOMCL1660	ORTHOMCL1666	ORTHOMCL1662
ORTHOMCL1658	ORTHOMCL1712	ORTHOMCL1660	ORTHOMCL1721	ORTHOMCL1660	ORTHOMCL1668	ORTHOMCL1667	ORTHOMCL1664	ORTHOMCL1661	ORTHOMCL1667	ORTHOMCL1663
ORTHOMCL1659	ORTHOMCL1713	ORTHOMCL1661	ORTHOMCL1722	ORTHOMCL1661	ORTHOMCL1670	ORTHOMCL1668	ORTHOMCL1665	ORTHOMCL1662	ORTHOMCL1668	ORTHOMCL1664
ORTHOMCL1660	ORTHOMCL1714	ORTHOMCL1662	ORTHOMCL1723	ORTHOMCL1662	ORTHOMCL1671	ORTHOMCL1670	ORTHOMCL1666	ORTHOMCL1663	ORTHOMCL1669	ORTHOMCL1665
ORTHOMCL1661	ORTHOMCL1715	ORTHOMCL1663	ORTHOMCL1724	ORTHOMCL1663	ORTHOMCL1672	ORTHOMCL1671	ORTHOMCL1667	ORTHOMCL1664	ORTHOMCL1670	ORTHOMCL1666
ORTHOMCL1662	ORTHOMCL1716	ORTHOMCL1664	ORTHOMCL1725	ORTHOMCL1664	ORTHOMCL1673	ORTHOMCL1672	ORTHOMCL1668	ORTHOMCL1665	ORTHOMCL1671	ORTHOMCL1667
ORTHOMCL1663	ORTHOMCL1717	ORTHOMCL1665	ORTHOMCL1726	ORTHOMCL1665	ORTHOMCL1674	ORTHOMCL1673	ORTHOMCL1669	ORTHOMCL1666	ORTHOMCL1672	ORTHOMCL1668
ORTHOMCL1664	ORTHOMCL1718	ORTHOMCL1666	ORTHOMCL1727	ORTHOMCL1666	ORTHOMCL1675	ORTHOMCL1674	ORTHOMCL1670	ORTHOMCL1667	ORTHOMCL1673	ORTHOMCL1669
ORTHOMCL1665	ORTHOMCL1719	ORTHOMCL1667	ORTHOMCL1728	ORTHOMCL1667	ORTHOMCL1676	ORTHOMCL1675	ORTHOMCL1671	ORTHOMCL1668	ORTHOMCL1674	ORTHOMCL1670
ORTHOMCL1666	ORTHOMCL1720	ORTHOMCL1668	ORTHOMCL1729	ORTHOMCL1668	ORTHOMCL1677	ORTHOMCL1676	ORTHOMCL1672	ORTHOMCL1669	ORTHOMCL1675	ORTHOMCL1671
ORTHOMCL1667	ORTHOMCL1721	ORTHOMCL1669	ORTHOMCL1730	ORTHOMCL1669	ORTHOMCL1678	ORTHOMCL1677	ORTHOMCL1673	ORTHOMCL1670	ORTHOMCL1676	ORTHOMCL1672
ORTHOMCL1668	ORTHOMCL1722	ORTHOMCL1670	ORTHOMCL1731	ORTHOMCL1670	ORTHOMCL1679	ORTHOMCL1678	ORTHOMCL1674	ORTHOMCL1671	ORTHOMCL1677	ORTHOMCL1673
ORTHOMCL1669	ORTHOMCL1723	ORTHOMCL1671	ORTHOMCL1732	ORTHOMCL1671	ORTHOMCL1680	ORTHOMCL1679	ORTHOMCL1675	ORTHOMCL1672	ORTHOMCL1678	ORTHOMCL1674
ORTHOMCL1670	ORTHOMCL1724	ORTHOMCL1672	ORTHOMCL1733	ORTHOMCL1672	ORTHOMCL1681	ORTHOMCL1680	ORTHOMCL1676	ORTHOMCL1673	ORTHOMCL1679	ORTHOMCL1675
ORTHOMCL1671	ORTHOMCL1725	ORTHOMCL1673	ORTHOMCL1734	ORTHOMCL1673	ORTHOMCL1682	ORTHOMCL1681	ORTHOMCL1677	ORTHOMCL1674	ORTHOMCL1680	ORTHOMCL1676
ORTHOMCL1672	ORTHOMCL1726	ORTHOMCL1674	ORTHOMCL1735	ORTHOMCL1674	ORTHOMCL1683	ORTHOMCL1682	ORTHOMCL1678	ORTHOMCL1675	ORTHOMCL1681	ORTHOMCL1677
ORTHOMCL1674	ORTHOMCL1727	ORTHOMCL1675	ORTHOMCL1736	ORTHOMCL1675	ORTHOMCL1684	ORTHOMCL1683	ORTHOMCL1679	ORTHOMCL1676	ORTHOMCL1682	ORTHOMCL1678
ORTHOMCL1675	ORTHOMCL1728	ORTHOMCL1676	ORTHOMCL1737	ORTHOMCL1676	ORTHOMCL1685	ORTHOMCL1684	ORTHOMCL1680	ORTHOMCL1677	ORTHOMCL1683	ORTHOMCL1679
ORTHOMCL1676	ORTHOMCL1729	ORTHOMCL1677	ORTHOMCL1739	ORTHOMCL1677	ORTHOMCL1686	ORTHOMCL1685	ORTHOMCL1681	ORTHOMCL1678	ORTHOMCL1684	ORTHOMCL1680
ORTHOMCL1677	ORTHOMCL1730	ORTHOMCL1678	ORTHOMCL1740	ORTHOMCL1678	ORTHOMCL1687	ORTHOMCL1686	ORTHOMCL1682	ORTHOMCL1679	ORTHOMCL1685	ORTHOMCL1681
ORTHOMCL1678	ORTHOMCL1731	ORTHOMCL1679	ORTHOMCL1741	ORTHOMCL1679	ORTHOMCL1688	ORTHOMCL1687	ORTHOMCL1683	ORTHOMCL1680	ORTHOMCL1686	ORTHOMCL1683
ORTHOMCL1679	ORTHOMCL1732	ORTHOMCL1680	ORTHOMCL1742	ORTHOMCL1680	ORTHOMCL1689	ORTHOMCL1688	ORTHOMCL1684	ORTHOMCL1681	ORTHOMCL1687	ORTHOMCL1684
ORTHOMCL1680	ORTHOMCL1733	ORTHOMCL1681	ORTHOMCL1743	ORTHOMCL1681	ORTHOMCL1690	ORTHOMCL1689	ORTHOMCL1685	ORTHOMCL1682	ORTHOMCL1688	ORTHOMCL1685
ORTHOMCL1681	ORTHOMCL1734	ORTHOMCL1682	ORTHOMCL1744	ORTHOMCL1682	ORTHOMCL1691	ORTHOMCL1690	ORTHOMCL1686	ORTHOMCL1683	ORTHOMCL1689	ORTHOMCL1686
ORTHOMCL1682	ORTHOMCL1735	ORTHOMCL1683	ORTHOMCL1745	ORTHOMCL1683	ORTHOMCL1692	ORTHOMCL1691	ORTHOMCL1687	ORTHOMCL1684	ORTHOMCL1690	ORTHOMCL1687
ORTHOMCL1683	ORTHOMCL1736	ORTHOMCL1684	ORTHOMCL1746	ORTHOMCL1684	ORTHOMCL1693	ORTHOMCL1692	ORTHOMCL1688	ORTHOMCL1685	ORTHOMCL1691	ORTHOMCL1688
ORTHOMCL1684	ORTHOMCL1737	ORTHOMCL1685	ORTHOMCL1747	ORTHOMCL1685	ORTHOMCL1694	ORTHOMCL1693	ORTHOMCL1689	ORTHOMCL1686	ORTHOMCL1692	ORTHOMCL1689
ORTHOMCL1686	ORTHOMCL1738	ORTHOMCL1686	ORTHOMCL1748	ORTHOMCL1686	ORTHOMCL1695	ORTHOMCL1694	ORTHOMCL1690	ORTHOMCL1687	ORTHOMCL1693	ORTHOMCL1690
ORTHOMCL1687	ORTHOMCL1739	ORTHOMCL1687	ORTHOMCL1749	ORTHOMCL1687	ORTHOMCL1696	ORTHOMCL1695	ORTHOMCL1691	ORTHOMCL1688	ORTHOMCL1694	ORTHOMCL1691
ORTHOMCL1688	ORTHOMCL1740	ORTHOMCL1688	ORTHOMCL1750	ORTHOMCL1688	ORTHOMCL1697	ORTHOMCL1696	ORTHOMCL1692	ORTHOMCL1689	ORTHOMCL1695	ORTHOMCL1692
ORTHOMCL1689	ORTHOMCL1741	ORTHOMCL1689	ORTHOMCL1751	ORTHOMCL1689	ORTHOMCL1698	ORTHOMCL1697	ORTHOMCL1693	ORTHOMCL1690	ORTHOMCL1696	ORTHOMCL1693
ORTHOMCL1690	ORTHOMCL1742	ORTHOMCL1690	ORTHOMCL1752	ORTHOMCL1690	ORTHOMCL1699	ORTHOMCL1698	ORTHOMCL1694	ORTHOMCL1691	ORTHOMCL1697	ORTHOMCL1694
ORTHOMCL1691	ORTHOMCL1743	ORTHOMCL1691	ORTHOMCL1753	ORTHOMCL1691	ORTHOMCL1700	ORTHOMCL1699	ORTHOMCL1695	ORTHOMCL1692	ORTHOMCL1698	ORTHOMCL1695
ORTHOMCL1692	ORTHOMCL1744	ORTHOMCL1692	ORTHOMCL1754	ORTHOMCL1692	ORTHOMCL1701	ORTHOMCL1700	ORTHOMCL1696	ORTHOMCL1693	ORTHOMCL1699	ORTHOMCL1696
ORTHOMCL1693	ORTHOMCL1745	ORTHOMCL1693	ORTHOMCL1755	ORTHOMCL1693	ORTHOMCL1702	ORTHOMCL1701	ORTHOMCL1697	ORTHOMCL1694	ORTHOMCL1700	ORTHOMCL1697
ORTHOMCL1694	ORTHOMCL1746	ORTHOMCL1694	ORTHOMCL1756	ORTHOMCL1694	ORTHOMCL1703	ORTHOMCL1702	ORTHOMCL1698	ORTHOMCL1695	ORTHOMCL1701	ORTHOMCL1698
ORTHOMCL1695	ORTHOMCL1747	ORTHOMCL1695	ORTHOMCL1757	ORTHOMCL1695	ORTHOMCL1704	ORTHOMCL1703	ORTHOMCL1699	ORTHOMCL1696	ORTHOMCL1702	ORTHOMCL1699
ORTHOMCL1696	ORTHOMCL1748	ORTHOMCL1696	ORTHOMCL1758	ORTHOMCL1696	ORTHOMCL1705	ORTHOMCL1704	ORTHOMCL1700	ORTHOMCL1697	ORTHOMCL1703	ORTHOMCL1700
ORTHOMCL1697	ORTHOMCL1749	ORTHOMCL1697	ORTHOMCL1759	ORTHOMCL1697	ORTHOMCL1706	ORTHOMCL1705	ORTHOMCL1701	ORTHOMCL1698	ORTHOMCL1704	ORTHOMCL1701
ORTHOMCL1698	ORTHOMCL1750	ORTHOMCL1698	ORTHOMCL1760	ORTHOMCL1698	ORTHOMCL1707	ORTHOMCL1706	ORTHOMCL1702	ORTHOMCL1699	ORTHOMCL1705	ORTHOMCL1702
ORTHOMCL1699	ORTHOMCL1752	ORTHOMCL1699	ORTHOMCL1761	ORTHOMCL1699	ORTHOMCL1708	ORTHOMCL1707	ORTHOMCL1703	ORTHOMCL1700	ORTHOMCL1706	ORTHOMCL1703
ORTHOMCL1700	ORTHOMCL1753	ORTHOMCL1700	ORTHOMCL1762	ORTHOMCL1700	ORTHOMCL1709	ORTHOMCL1708	ORTHOMCL1704	ORTHOMCL1701	ORTHOMCL1707	ORTHOMCL1704
ORTHOMCL1701	ORTHOMCL1754	ORTHOMCL1701	ORTHOMCL1763	ORTHOMCL1701	ORTHOMCL1710	ORTHOMCL1709	ORTHOMCL1705	ORTHOMCL1702	ORTHOMCL1708	ORTHOMCL1705
ORTHOMCL1702	ORTHOMCL1755	ORTHOMCL1702	ORTHOMCL1764	ORTHOMCL1702	ORTHOMCL1711	ORTHOMCL1710	ORTHOMCL1706	ORTHOMCL1703	ORTHOMCL1709	ORTHOMCL1706
ORTHOMCL1703	ORTHOMCL1756	ORTHOMCL1703	ORTHOMCL1765	ORTHOMCL1703	ORTHOMCL1712	ORTHOMCL1711	ORTHOMCL1707	ORTHOMCL1704	ORTHOMCL1710	ORTHOMCL1707
ORTHOMCL1704	ORTHOMCL1757	ORTHOMCL1704	ORTHOMCL1766	ORTHOMCL1704	ORTHOMCL1713	ORTHOMCL1712	ORTHOMCL1708	ORTHOMCL1705	ORTHOMCL1711	ORTHOMCL1708
ORTHOMCL1705	ORTHOMCL1758	ORTHOMCL1705	ORTHOMCL1767	ORTHOMCL1705	ORTHOMCL1715	ORTHOMCL1713	ORTHOMCL1709	ORTHOMCL1706	ORTHOMCL1712	ORTHOMCL1709
ORTHOMCL1706	ORTHOMCL1759	ORTHOMCL1706	ORTHOMCL1769	ORTHOMCL1706	ORTHOMCL1716	ORTHOMCL1714	ORTHOMCL1710	ORTHOMCL1707	ORTHOMCL1713	ORTHOMCL1710
ORTHOMCL1707	ORTHOMCL1760	ORTHOMCL1707	ORTHOMCL1770	ORTHOMCL1707	ORTHOMCL1717	ORTHOMCL1715	ORTHOMCL1711	ORTHOMCL1708	ORTHOMCL1714	ORTHOMCL1711
ORTHOMCL1708	ORTHOMCL1761	ORTHOMCL1708	ORTHOMCL1771	ORTHOMCL1708	ORTHOMCL1718	ORTHOMCL1716	ORTHOMCL1712	ORTHOMCL1709	ORTHOMCL1715	ORTHOMCL1712
ORTHOMCL1709	ORTHOMCL1762	ORTHOMCL1709	ORTHOMCL1773	ORTHOMCL1709	ORTHOMCL1719	ORTHOMCL1717	ORTHOMCL1713	ORTHOMCL1710	ORTHOMCL1716	ORTHOMCL1713
ORTHOMCL1710	ORTHOMCL1763	ORTHOMCL1710	ORTHOMCL1774	ORTHOMCL1710	ORTHOMCL1720	ORTHOMCL1718	ORTHOMCL1714	ORTHOMCL1711	ORTHOMCL1717	ORTHOMCL1714
ORTHOMCL1711	ORTHOMCL1764	ORTHOMCL1713	ORTHOMCL1775	ORTHOMCL1711	ORTHOMCL1721	ORTHOMCL1719	ORTHOMCL1715	ORTHOMCL1712	ORTHOMCL1718	ORTHOMCL1715
ORTHOMCL1712	ORTHOMCL1765	ORTHOMCL1714	ORTHOMCL1776	ORTHOMCL1712	ORTHOMCL1722	ORTHOMCL1720	ORTHOMCL1716	ORTHOMCL1713	ORTHOMCL1719	ORTHOMCL1716
ORTHOMCL1713	ORTHOMCL1766	ORTHOMCL1715	ORTHOMCL1777	ORTHOMCL1713	ORTHOMCL1723	ORTHOMCL1721	ORTHOMCL1717	ORTHOMCL1714	ORTHOMCL1720	ORTHOMCL1717
ORTHOMCL1714	ORTHOMCL1767	ORTHOMCL1716	ORTHOMCL1778	ORTHOMCL1714	ORTHOMCL1724	ORTHOMCL1722	ORTHOMCL1718	ORTHOMCL1715	ORTHOMCL1721	ORTHOMCL1718
ORTHOMCL1715	ORTHOMCL1769	ORTHOMCL1717	ORTHOMCL1779	ORTHOMCL1715	ORTHOMCL1725	ORTHOMCL1724	ORTHOMCL1719	ORTHOMCL1716	ORTHOMCL1722	ORTHOMCL1719
ORTHOMCL1716	ORTHOMCL1770	ORTHOMCL1718	ORTHOMCL1780	ORTHOMCL1716	ORTHOMCL1726	ORTHOMCL1725	ORTHOMCL1720	ORTHOMCL1717	ORTHOMCL1723	ORTHOMCL1720
ORTHOMCL1717	ORTHOMCL1771	ORTHOMCL1719	ORTHOMCL1781	ORTHOMCL1717	ORTHOMCL1727	ORTHOMCL1726	ORTHOMCL1721	ORTHOMCL1718	ORTHOMCL1724	ORTHOMCL1721
ORTHOMCL1718	ORTHOMCL1772	ORTHOMCL1720	ORTHOMCL1782	ORTHOMCL1718	ORTHOMCL1728	ORTHOMCL1727	ORTHOMCL1722	ORTHOMCL1719	ORTHOMCL1725	ORTHOMCL1722
ORTHOMCL1719	ORTHOMCL1773	ORTHOMCL1721	ORTHOMCL1783	ORTHOMCL1719	ORTHOMCL1729	ORTHOMCL1728	ORTHOMCL1723	ORTHOMCL1720	ORTHOMCL1726	ORTHOMCL1723
ORTHOMCL1720	ORTHOMCL1774	ORTHOMCL1723	ORTHOMCL1784	ORTHOMCL1720	ORTHOMCL1730	ORTHOMCL1729	ORTHOMCL1724	ORTHOMCL1721	ORTHOMCL1727	ORTHOMCL1724
ORTHOMCL1721	ORTHOMCL1775	ORTHOMCL1724	ORTHOMCL1785	ORTHOMCL1721	ORTHOMCL1731	ORTHOMCL1730	ORTHOMCL1725	ORTHOMCL1722	ORTHOMCL1728	ORTHOMCL1725
ORTHOMCL1722	ORTHOMCL1776	ORTHOMCL1725	ORTHOMCL1786	ORTHOMCL1722	ORTHOMCL1732	ORTHOMCL1731	ORTHOMCL1726	ORTHOMCL1723	ORTHOMCL1729	ORTHOMCL1726
ORTHOMCL1723	ORTHOMCL1777	ORTHOMCL1726	ORTHOMCL1787	ORTHOMCL1723	ORTHOMCL1733	ORTHOMCL1732	ORTHOMCL1727	ORTHOMCL1724	ORTHOMCL1730	ORTHOMCL1727
ORTHOMCL1724	ORTHOMCL1778	ORTHOMCL1727	ORTHOMCL1788	ORTHOMCL1724	ORTHOMCL1734	ORTHOMCL1733	ORTHOMCL1728	ORTHOMCL1725	ORTHOMCL1731	ORTHOMCL1728
ORTHOMCL1725	ORTHOMCL1779	ORTHOMCL1728	ORTHOMCL1789	ORTHOMCL1725	ORTHOMCL1735	ORTHOMCL1734	ORTHOMCL1729	ORTHOMCL1726	ORTHOMCL1732	ORTHOMCL1729
ORTHOMCL1726	ORTHOMCL1780	ORTHOMCL1729	ORTHOMCL1790	ORTHOMCL1726	ORTHOMCL1736	ORTHOMCL1735	ORTHOMCL1730	ORTHOMCL1727	ORTHOMCL1733	ORTHOMCL1730
ORTHOMCL1727	ORTHOMCL1781	ORTHOMCL1730	ORTHOMCL1791	ORTHOMCL1727	ORTHOMCL1737	ORTHOMCL1736	ORTHOMCL1731	ORTHOMCL1728	ORTHOMCL1734	ORTHOMCL1731
ORTHOMCL1728	ORTHOMCL1782	ORTHOMCL1731	ORTHOMCL1792	ORTHOMCL1728	ORTHOMCL1738	ORTHOMCL1737	ORTHOMCL1732	ORTHOMCL1729	ORTHOMCL1735	ORTHOMCL1732
ORTHOMCL1729	ORTHOMCL1783	ORTHOMCL1732	ORTHOMCL1793	ORTHOMCL1729	ORTHOMCL1739	ORTHOMCL1738	ORTHOMCL1733	ORTHOMCL1730	ORTHOMCL1736	ORTHOMCL1733
ORTHOMCL1730	ORTHOMCL1784	ORTHOMCL1733	ORTHOMCL1794	ORTHOMCL1730	ORTHOMCL1740	ORTHOMCL1739	ORTHOMCL1734	ORTHOMCL1731	ORTHOMCL1737	ORTHOMCL1734
ORTHOMCL1731	ORTHOMCL1785	ORTHOMCL1734	ORTHOMCL1795	ORTHOMCL1731	ORTHOMCL1741	ORTHOMCL1740	ORTHOMCL1735	ORTHOMCL1732	ORTHOMCL1738	ORTHOMCL1735
ORTHOMCL1732	ORTHOMCL1786	ORTHOMCL1735	ORTHOMCL1796	ORTHOMCL1732	ORTHOMCL1742	ORTHOMCL1741	ORTHOMCL1736	ORTHOMCL1733	ORTHOMCL1739	ORTHOMCL1736
ORTHOMCL1733	ORTHOMCL1787	ORTHOMCL1736	ORTHOMCL1797	ORTHOMCL1733	ORTHOMCL1743	ORTHOMCL1742	ORTHOMCL1737	ORTHOMCL1734	ORTHOMCL1740	ORTHOMCL1737
ORTHOMCL1734	ORTHOMCL1788	ORTHOMCL1737	ORTHOMCL1798	ORTHOMCL1734	ORTHOMCL1744	ORTHOMCL1743	ORTHOMCL1739	ORTHOMCL1735	ORTHOMCL1741	ORTHOMCL1738
ORTHOMCL1735	ORTHOMCL1789	ORTHOMCL1738	ORTHOMCL1799	ORTHOMCL1735	ORTHOMCL1745	ORTHOMCL1744	ORTHOMCL1740	ORTHOMCL1736	ORTHOMCL1742	ORTHOMCL1739
ORTHOMCL1736	ORTHOMCL1790	ORTHOMCL1739	ORTHOMCL1800	ORTHOMCL1736	ORTHOMCL1746	ORTHOMCL1745	ORTHOMCL1741	ORTHOMCL1737	ORTHOMCL1743	ORTHOMCL1740
ORTHOMCL1737	ORTHOMCL1791	ORTHOMCL1740	ORTHOMCL1801	ORTHOMCL1737	ORTHOMCL1747	ORTHOMCL1746	ORTHOMCL1742	ORTHOMCL1738	ORTHOMCL1744	ORTHOMCL1741
ORTHOMCL1738	ORTHOMCL1792	ORTHOMCL1741	ORTHOMCL1802	ORTHOMCL1738	ORTHOMCL1748	ORTHOMCL1747	ORTHOMCL1743	ORTHOMCL1739	ORTHOMCL1745	ORTHOMCL1742
ORTHOMCL1739	ORTHOMCL1793	ORTHOMCL1742	ORTHOMCL1803	ORTHOMCL1739	ORTHOMCL1749	ORTHOMCL1748	ORTHOMCL1744	ORTHOMCL1740	ORTHOMCL1746	ORTHOMCL1743
ORTHOMCL1740	ORTHOMCL1794	ORTHOMCL1743	ORTHOMCL1804	ORTHOMCL1740	ORTHOMCL1750	ORTHOMCL1749	ORTHOMCL1745	ORTHOMCL1741	ORTHOMCL1747	ORTHOMCL1744
ORTHOMCL1741	ORTHOMCL1795	ORTHOMCL1744	ORTHOMCL1805	ORTHOMCL1742	ORTHOMCL1751	ORTHOMCL1750	ORTHOMCL1746	ORTHOMCL1742	ORTHOMCL1748	ORTHOMCL1745
ORTHOMCL1742	ORTHOMCL1796	ORTHOMCL1745	ORTHOMCL1806	ORTHOMCL1743	ORTHOMCL1752	ORTHOMCL1751	ORTHOMCL1747	ORTHOMCL1743	ORTHOMCL1749	ORTHOMCL1746
ORTHOMCL1743	ORTHOMCL1797	ORTHOMCL1746	ORTHOMCL1807	ORTHOMCL1744	ORTHOMCL1753	ORTHOMCL1752	ORTHOMCL1748	ORTHOMCL1744	ORTHOMCL1750	ORTHOMCL1747
ORTHOMCL1744	ORTHOMCL1798	ORTHOMCL1747	ORTHOMCL1808	ORTHOMCL1745	ORTHOMCL1754	ORTHOMCL1753	ORTHOMCL1749	ORTHOMCL1745	ORTHOMCL1751	ORTHOMCL1748
ORTHOMCL1745	ORTHOMCL1799	ORTHOMCL1748	ORTHOMCL1809	ORTHOMCL1746	ORTHOMCL1755	ORTHOMCL1754	ORTHOMCL1750	ORTHOMCL1746	ORTHOMCL1752	ORTHOMCL1749
ORTHOMCL1746	ORTHOMCL1800	ORTHOMCL1749	ORTHOMCL1810	ORTHOMCL1747	ORTHOMCL1756	ORTHOMCL1755	ORTHOMCL1751	ORTHOMCL1747	ORTHOMCL1753	ORTHOMCL1751
ORTHOMCL1747	ORTHOMCL1801	ORTHOMCL1750	ORTHOMCL1811	ORTHOMCL1748	ORTHOMCL1757	ORTHOMCL1756	ORTHOMCL1752	ORTHOMCL1748	ORTHOMCL1754	ORTHOMCL1752
ORTHOMCL1748	ORTHOMCL1802	ORTHOMCL1751	ORTHOMCL1812	ORTHOMCL1749	ORTHOMCL1758	ORTHOMCL1757	ORTHOMCL1753	ORTHOMCL1749	ORTHOMCL1755	ORTHOMCL1753
ORTHOMCL1749	ORTHOMCL1803	ORTHOMCL1752	ORTHOMCL1813	ORTHOMCL1750	ORTHOMCL1759	ORTHOMCL1758	ORTHOMCL1754	ORTHOMCL1750	ORTHOMCL1756	ORTHOMCL1754
ORTHOMCL1750	ORTHOMCL1804	ORTHOMCL1753	ORTHOMCL1814	ORTHOMCL1751	ORTHOMCL1760	ORTHOMCL1759	ORTHOMCL1755	ORTHOMCL1751	ORTHOMCL1757	ORTHOMCL1755
ORTHOMCL1751	ORTHOMCL1805	ORTHOMCL1755	ORTHOMCL1815	ORTHOMCL1752	ORTHOMCL1762	ORTHOMCL1760	ORTHOMCL1757	ORTHOMCL1752	ORTHOMCL1758	ORTHOMCL1756
ORTHOMCL1752	ORTHOMCL1806	ORTHOMCL1756	ORTHOMCL1816	ORTHOMCL1753	ORTHOMCL1763	ORTHOMCL1761	ORTHOMCL1758	ORTHOMCL1753	ORTHOMCL1759	ORTHOMCL1757
ORTHOMCL1753	ORTHOMCL1807	ORTHOMCL1757	ORTHOMCL1817	ORTHOMCL1754	ORTHOMCL1764	ORTHOMCL1762	ORTHOMCL1759	ORTHOMCL1754	ORTHOMCL1760	ORTHOMCL1758
ORTHOMCL1754	ORTHOMCL1808	ORTHOMCL1758	ORTHOMCL1818	ORTHOMCL1755	ORTHOMCL1765	ORTHOMCL1763	ORTHOMCL1760	ORTHOMCL1755	ORTHOMCL1761	ORTHOMCL1759
ORTHOMCL1755	ORTHOMCL1809	ORTHOMCL1759	ORTHOMCL1819	ORTHOMCL1756	ORTHOMCL1766	ORTHOMCL1764	ORTHOMCL1761	ORTHOMCL1756	ORTHOMCL1762	ORTHOMCL1760
ORTHOMCL1756	ORTHOMCL1810	ORTHOMCL1760	ORTHOMCL1820	ORTHOMCL1757	ORTHOMCL1767	ORTHOMCL1765	ORTHOMCL1762	ORTHOMCL1757	ORTHOMCL1763	ORTHOMCL1761
ORTHOMCL1757	ORTHOMCL1811	ORTHOMCL1761	ORTHOMCL1821	ORTHOMCL1758	ORTHOMCL1768	ORTHOMCL1766	ORTHOMCL1763	ORTHOMCL1758	ORTHOMCL1764	ORTHOMCL1762
ORTHOMCL1758	ORTHOMCL1812	ORTHOMCL1762	ORTHOMCL1822	ORTHOMCL1759	ORTHOMCL1769	ORTHOMCL1767	ORTHOMCL1764	ORTHOMCL1759	ORTHOMCL1765	ORTHOMCL1763
ORTHOMCL1759	ORTHOMCL1813	ORTHOMCL1763	ORTHOMCL1823	ORTHOMCL1760	ORTHOMCL1770	ORTHOMCL1768	ORTHOMCL1765	ORTHOMCL1760	ORTHOMCL1766	ORTHOMCL1764
ORTHOMCL1760	ORTHOMCL1814	ORTHOMCL1764	ORTHOMCL1824	ORTHOMCL1761	ORTHOMCL1771	ORTHOMCL1769	ORTHOMCL1766	ORTHOMCL1761	ORTHOMCL1767	ORTHOMCL1765
ORTHOMCL1761	ORTHOMCL1815	ORTHOMCL1765	ORTHOMCL1825	ORTHOMCL1762	ORTHOMCL1772	ORTHOMCL1770	ORTHOMCL1767	ORTHOMCL1762	ORTHOMCL1768	ORTHOMCL1766
ORTHOMCL1762	ORTHOMCL1817	ORTHOMCL1767	ORTHOMCL1826	ORTHOMCL1763	ORTHOMCL1773	ORTHOMCL1771	ORTHOMCL1768	ORTHOMCL1763	ORTHOMCL1769	ORTHOMCL1767
ORTHOMCL1763	ORTHOMCL1818	ORTHOMCL1768	ORTHOMCL1827	ORTHOMCL1764	ORTHOMCL1774	ORTHOMCL1772	ORTHOMCL1769	ORTHOMCL1764	ORTHOMCL1770	ORTHOMCL1768
ORTHOMCL1764	ORTHOMCL1819	ORTHOMCL1769	ORTHOMCL1828	ORTHOMCL1765	ORTHOMCL1775	ORTHOMCL1773	ORTHOMCL1770	ORTHOMCL1765	ORTHOMCL1771	ORTHOMCL1769
ORTHOMCL1765	ORTHOMCL1820	ORTHOMCL1770	ORTHOMCL1829	ORTHOMCL1766	ORTHOMCL1776	ORTHOMCL1774	ORTHOMCL1771	ORTHOMCL1767	ORTHOMCL1772	ORTHOMCL1770
ORTHOMCL1766	ORTHOMCL1821	ORTHOMCL1771	ORTHOMCL1830	ORTHOMCL1767	ORTHOMCL1777	ORTHOMCL1775	ORTHOMCL1773	ORTHOMCL1768	ORTHOMCL1773	ORTHOMCL1771
ORTHOMCL1767	ORTHOMCL1823	ORTHOMCL1772	ORTHOMCL1831	ORTHOMCL1768	ORTHOMCL1778	ORTHOMCL1776	ORTHOMCL1774	ORTHOMCL1769	ORTHOMCL1774	ORTHOMCL1773
ORTHOMCL1768	ORTHOMCL1824	ORTHOMCL1773	ORTHOMCL1832	ORTHOMCL1769	ORTHOMCL1779	ORTHOMCL1777	ORTHOMCL1775	ORTHOMCL1770	ORTHOMCL1775	ORTHOMCL1774
ORTHOMCL1769	ORTHOMCL1825	ORTHOMCL1774	ORTHOMCL1833	ORTHOMCL1770	ORTHOMCL1780	ORTHOMCL1778	ORTHOMCL1776	ORTHOMCL1771	ORTHOMCL1776	ORTHOMCL1775
ORTHOMCL1770	ORTHOMCL1826	ORTHOMCL1775	ORTHOMCL1834	ORTHOMCL1771	ORTHOMCL1781	ORTHOMCL1779	ORTHOMCL1777	ORTHOMCL1772	ORTHOMCL1777	ORTHOMCL1776
ORTHOMCL1771	ORTHOMCL1827	ORTHOMCL1776	ORTHOMCL1835	ORTHOMCL1772	ORTHOMCL1782	ORTHOMCL1780	ORTHOMCL1778	ORTHOMCL1773	ORTHOMCL1778	ORTHOMCL1777
ORTHOMCL1772	ORTHOMCL1828	ORTHOMCL1777	ORTHOMCL1836	ORTHOMCL1773	ORTHOMCL1784	ORTHOMCL1781	ORTHOMCL1779	ORTHOMCL1774	ORTHOMCL1779	ORTHOMCL1778
ORTHOMCL1773	ORTHOMCL1829	ORTHOMCL1778	ORTHOMCL1837	ORTHOMCL1774	ORTHOMCL1785	ORTHOMCL1782	ORTHOMCL1780	ORTHOMCL1775	ORTHOMCL1780	ORTHOMCL1779
ORTHOMCL1774	ORTHOMCL1830	ORTHOMCL1779	ORTHOMCL1838	ORTHOMCL1775	ORTHOMCL1786	ORTHOMCL1783	ORTHOMCL1781	ORTHOMCL1776	ORTHOMCL1781	ORTHOMCL1780
ORTHOMCL1775	ORTHOMCL1831	ORTHOMCL1780	ORTHOMCL1839	ORTHOMCL1776	ORTHOMCL1787	ORTHOMCL1784	ORTHOMCL1782	ORTHOMCL1777	ORTHOMCL1782	ORTHOMCL1781
ORTHOMCL1776	ORTHOMCL1832	ORTHOMCL1782	ORTHOMCL1840	ORTHOMCL1777	ORTHOMCL1788	ORTHOMCL1785	ORTHOMCL1783	ORTHOMCL1778	ORTHOMCL1783	ORTHOMCL1782
ORTHOMCL1778	ORTHOMCL1833	ORTHOMCL1783	ORTHOMCL1841	ORTHOMCL1778	ORTHOMCL1789	ORTHOMCL1786	ORTHOMCL1784	ORTHOMCL1779	ORTHOMCL1784	ORTHOMCL1783
ORTHOMCL1779	ORTHOMCL1834	ORTHOMCL1784	ORTHOMCL1842	ORTHOMCL1779	ORTHOMCL1790	ORTHOMCL1787	ORTHOMCL1785	ORTHOMCL1780	ORTHOMCL1785	ORTHOMCL1784
ORTHOMCL1780	ORTHOMCL1835	ORTHOMCL1785	ORTHOMCL1843	ORTHOMCL1780	ORTHOMCL1791	ORTHOMCL1788	ORTHOMCL1786	ORTHOMCL1781	ORTHOMCL1786	ORTHOMCL1785
ORTHOMCL1781	ORTHOMCL1836	ORTHOMCL1786	ORTHOMCL1844	ORTHOMCL1781	ORTHOMCL1792	ORTHOMCL1789	ORTHOMCL1787	ORTHOMCL1782	ORTHOMCL1787	ORTHOMCL1786
ORTHOMCL1782	ORTHOMCL1837	ORTHOMCL1787	ORTHOMCL1845	ORTHOMCL1782	ORTHOMCL1793	ORTHOMCL1790	ORTHOMCL1788	ORTHOMCL1783	ORTHOMCL1788	ORTHOMCL1787
ORTHOMCL1783	ORTHOMCL1838	ORTHOMCL1788	ORTHOMCL1846	ORTHOMCL1783	ORTHOMCL1794	ORTHOMCL1791	ORTHOMCL1789	ORTHOMCL1784	ORTHOMCL1789	ORTHOMCL1788
ORTHOMCL1784	ORTHOMCL1839	ORTHOMCL1789	ORTHOMCL1847	ORTHOMCL1784	ORTHOMCL1795	ORTHOMCL1792	ORTHOMCL1790	ORTHOMCL1785	ORTHOMCL1790	ORTHOMCL1789
ORTHOMCL1785	ORTHOMCL1840	ORTHOMCL1790	ORTHOMCL1848	ORTHOMCL1785	ORTHOMCL1796	ORTHOMCL1793	ORTHOMCL1791	ORTHOMCL1786	ORTHOMCL1791	ORTHOMCL1790
ORTHOMCL1786	ORTHOMCL1841	ORTHOMCL1791	ORTHOMCL1850	ORTHOMCL1786	ORTHOMCL1797	ORTHOMCL1794	ORTHOMCL1792	ORTHOMCL1787	ORTHOMCL1792	ORTHOMCL1791
ORTHOMCL1787	ORTHOMCL1842	ORTHOMCL1792	ORTHOMCL1851	ORTHOMCL1787	ORTHOMCL1798	ORTHOMCL1795	ORTHOMCL1793	ORTHOMCL1788	ORTHOMCL1793	ORTHOMCL1792
ORTHOMCL1788	ORTHOMCL1843	ORTHOMCL1793	ORTHOMCL1852	ORTHOMCL1788	ORTHOMCL1799	ORTHOMCL1796	ORTHOMCL1794	ORTHOMCL1789	ORTHOMCL1794	ORTHOMCL1793
ORTHOMCL1789	ORTHOMCL1844	ORTHOMCL1794	ORTHOMCL1853	ORTHOMCL1789	ORTHOMCL1800	ORTHOMCL1797	ORTHOMCL1795	ORTHOMCL1790	ORTHOMCL1795	ORTHOMCL1794
ORTHOMCL1790	ORTHOMCL1845	ORTHOMCL1795	ORTHOMCL1854	ORTHOMCL1790	ORTHOMCL1801	ORTHOMCL1798	ORTHOMCL1796	ORTHOMCL1791	ORTHOMCL1796	ORTHOMCL1795
ORTHOMCL1791	ORTHOMCL1846	ORTHOMCL1796	ORTHOMCL1855	ORTHOMCL1791	ORTHOMCL1802	ORTHOMCL1799	ORTHOMCL1797	ORTHOMCL1792	ORTHOMCL1797	ORTHOMCL1796
ORTHOMCL1792	ORTHOMCL1847	ORTHOMCL1797	ORTHOMCL1856	ORTHOMCL1792	ORTHOMCL1803	ORTHOMCL1800	ORTHOMCL1798	ORTHOMCL1793	ORTHOMCL1798	ORTHOMCL1797
ORTHOMCL1793	ORTHOMCL1848	ORTHOMCL1798	ORTHOMCL1857	ORTHOMCL1793	ORTHOMCL1804	ORTHOMCL1801	ORTHOMCL1799	ORTHOMCL1794	ORTHOMCL1799	ORTHOMCL1798
ORTHOMCL1794	ORTHOMCL1850	ORTHOMCL1799	ORTHOMCL1858	ORTHOMCL1794	ORTHOMCL1805	ORTHOMCL1802	ORTHOMCL1800	ORTHOMCL1795	ORTHOMCL1800	ORTHOMCL1799
ORTHOMCL1795	ORTHOMCL1853	ORTHOMCL1800	ORTHOMCL1859	ORTHOMCL1795	ORTHOMCL1806	ORTHOMCL1803	ORTHOMCL1801	ORTHOMCL1796	ORTHOMCL1801	ORTHOMCL1800
ORTHOMCL1796	ORTHOMCL1854	ORTHOMCL1801	ORTHOMCL1860	ORTHOMCL1796	ORTHOMCL1807	ORTHOMCL1804	ORTHOMCL1802	ORTHOMCL1797	ORTHOMCL1802	ORTHOMCL1801
ORTHOMCL1797	ORTHOMCL1855	ORTHOMCL1802	ORTHOMCL1861	ORTHOMCL1797	ORTHOMCL1808	ORTHOMCL1805	ORTHOMCL1803	ORTHOMCL1798	ORTHOMCL1803	ORTHOMCL1802
ORTHOMCL1798	ORTHOMCL1856	ORTHOMCL1803	ORTHOMCL1862	ORTHOMCL1798	ORTHOMCL1809	ORTHOMCL1806	ORTHOMCL1804	ORTHOMCL1799	ORTHOMCL1804	ORTHOMCL1803
ORTHOMCL1799	ORTHOMCL1857	ORTHOMCL1804	ORTHOMCL1863	ORTHOMCL1799	ORTHOMCL1810	ORTHOMCL1807	ORTHOMCL1805	ORTHOMCL1800	ORTHOMCL1805	ORTHOMCL1804
ORTHOMCL1800	ORTHOMCL1858	ORTHOMCL1805	ORTHOMCL1864	ORTHOMCL1800	ORTHOMCL1811	ORTHOMCL1808	ORTHOMCL1806	ORTHOMCL1801	ORTHOMCL1806	ORTHOMCL1805
ORTHOMCL1801	ORTHOMCL1859	ORTHOMCL1806	ORTHOMCL1865	ORTHOMCL1801	ORTHOMCL1812	ORTHOMCL1809	ORTHOMCL1807	ORTHOMCL1802	ORTHOMCL1807	ORTHOMCL1806
ORTHOMCL1802	ORTHOMCL1860	ORTHOMCL1807	ORTHOMCL1866	ORTHOMCL1802	ORTHOMCL1813	ORTHOMCL1811	ORTHOMCL1808	ORTHOMCL1803	ORTHOMCL1808	ORTHOMCL1807
ORTHOMCL1803	ORTHOMCL1861	ORTHOMCL1808	ORTHOMCL1867	ORTHOMCL1803	ORTHOMCL1814	ORTHOMCL1812	ORTHOMCL1809	ORTHOMCL1804	ORTHOMCL1809	ORTHOMCL1808
ORTHOMCL1804	ORTHOMCL1862	ORTHOMCL1809	ORTHOMCL1868	ORTHOMCL1804	ORTHOMCL1815	ORTHOMCL1813	ORTHOMCL1810	ORTHOMCL1805	ORTHOMCL1810	ORTHOMCL1809
ORTHOMCL1805	ORTHOMCL1863	ORTHOMCL1810	ORTHOMCL1869	ORTHOMCL1805	ORTHOMCL1816	ORTHOMCL1814	ORTHOMCL1811	ORTHOMCL1806	ORTHOMCL1811	ORTHOMCL1810
ORTHOMCL1806	ORTHOMCL1864	ORTHOMCL1811	ORTHOMCL1870	ORTHOMCL1806	ORTHOMCL1817	ORTHOMCL1815	ORTHOMCL1812	ORTHOMCL1807	ORTHOMCL1812	ORTHOMCL1811
ORTHOMCL1807	ORTHOMCL1865	ORTHOMCL1812	ORTHOMCL1871	ORTHOMCL1807	ORTHOMCL1818	ORTHOMCL1816	ORTHOMCL1813	ORTHOMCL1808	ORTHOMCL1813	ORTHOMCL1812
ORTHOMCL1808	ORTHOMCL1866	ORTHOMCL1813	ORTHOMCL1872	ORTHOMCL1808	ORTHOMCL1819	ORTHOMCL1817	ORTHOMCL1814	ORTHOMCL1809	ORTHOMCL1814	ORTHOMCL1813
ORTHOMCL1809	ORTHOMCL1867	ORTHOMCL1814	ORTHOMCL1873	ORTHOMCL1809	ORTHOMCL1820	ORTHOMCL1818	ORTHOMCL1815	ORTHOMCL1810	ORTHOMCL1815	ORTHOMCL1815
ORTHOMCL1810	ORTHOMCL1868	ORTHOMCL1815	ORTHOMCL1874	ORTHOMCL1810	ORTHOMCL1821	ORTHOMCL1819	ORTHOMCL1816	ORTHOMCL1811	ORTHOMCL1816	ORTHOMCL1816
ORTHOMCL1811	ORTHOMCL1869	ORTHOMCL1816	ORTHOMCL1875	ORTHOMCL1811	ORTHOMCL1822	ORTHOMCL1820	ORTHOMCL1817	ORTHOMCL1812	ORTHOMCL1817	ORTHOMCL1817
ORTHOMCL1812	ORTHOMCL1870	ORTHOMCL1817	ORTHOMCL1876	ORTHOMCL1812	ORTHOMCL1823	ORTHOMCL1822	ORTHOMCL1819	ORTHOMCL1813	ORTHOMCL1819	ORTHOMCL1818
ORTHOMCL1813	ORTHOMCL1871	ORTHOMCL1818	ORTHOMCL1877	ORTHOMCL1813	ORTHOMCL1824	ORTHOMCL1823	ORTHOMCL1820	ORTHOMCL1814	ORTHOMCL1820	ORTHOMCL1819
ORTHOMCL1814	ORTHOMCL1872	ORTHOMCL1819	ORTHOMCL1878	ORTHOMCL1814	ORTHOMCL1825	ORTHOMCL1824	ORTHOMCL1821	ORTHOMCL1815	ORTHOMCL1821	ORTHOMCL1820
ORTHOMCL1815	ORTHOMCL1873	ORTHOMCL1820	ORTHOMCL1879	ORTHOMCL1815	ORTHOMCL1826	ORTHOMCL1825	ORTHOMCL1822	ORTHOMCL1816	ORTHOMCL1822	ORTHOMCL1821
ORTHOMCL1816	ORTHOMCL1874	ORTHOMCL1821	ORTHOMCL1880	ORTHOMCL1816	ORTHOMCL1827	ORTHOMCL1826	ORTHOMCL1823	ORTHOMCL1817	ORTHOMCL1823	ORTHOMCL1822
ORTHOMCL1817	ORTHOMCL1875	ORTHOMCL1822	ORTHOMCL1881	ORTHOMCL1817	ORTHOMCL1828	ORTHOMCL1827	ORTHOMCL1824	ORTHOMCL1818	ORTHOMCL1824	ORTHOMCL1823
ORTHOMCL1818	ORTHOMCL1876	ORTHOMCL1823	ORTHOMCL1882	ORTHOMCL1818	ORTHOMCL1829	ORTHOMCL1828	ORTHOMCL1825	ORTHOMCL1819	ORTHOMCL1825	ORTHOMCL1824
ORTHOMCL1819	ORTHOMCL1877	ORTHOMCL1824	ORTHOMCL1883	ORTHOMCL1821	ORTHOMCL1830	ORTHOMCL1829	ORTHOMCL1826	ORTHOMCL1820	ORTHOMCL1826	ORTHOMCL1825
ORTHOMCL1820	ORTHOMCL1878	ORTHOMCL1825	ORTHOMCL1885	ORTHOMCL1823	ORTHOMCL1831	ORTHOMCL1830	ORTHOMCL1827	ORTHOMCL1821	ORTHOMCL1827	ORTHOMCL1826
ORTHOMCL1821	ORTHOMCL1879	ORTHOMCL1826	ORTHOMCL1886	ORTHOMCL1824	ORTHOMCL1832	ORTHOMCL1831	ORTHOMCL1828	ORTHOMCL1822	ORTHOMCL1828	ORTHOMCL1827
ORTHOMCL1822	ORTHOMCL1880	ORTHOMCL1827	ORTHOMCL1887	ORTHOMCL1825	ORTHOMCL1833	ORTHOMCL1832	ORTHOMCL1829	ORTHOMCL1823	ORTHOMCL1829	ORTHOMCL1828
ORTHOMCL1823	ORTHOMCL1881	ORTHOMCL1828	ORTHOMCL1888	ORTHOMCL1826	ORTHOMCL1834	ORTHOMCL1833	ORTHOMCL1830	ORTHOMCL1824	ORTHOMCL1830	ORTHOMCL1829
ORTHOMCL1824	ORTHOMCL1882	ORTHOMCL1829	ORTHOMCL1889	ORTHOMCL1827	ORTHOMCL1835	ORTHOMCL1834	ORTHOMCL1831	ORTHOMCL1825	ORTHOMCL1831	ORTHOMCL1830
ORTHOMCL1825	ORTHOMCL1883	ORTHOMCL1830	ORTHOMCL1890	ORTHOMCL1828	ORTHOMCL1836	ORTHOMCL1835	ORTHOMCL1832	ORTHOMCL1826	ORTHOMCL1832	ORTHOMCL1831
ORTHOMCL1826	ORTHOMCL1884	ORTHOMCL1831	ORTHOMCL1891	ORTHOMCL1829	ORTHOMCL1837	ORTHOMCL1836	ORTHOMCL1833	ORTHOMCL1827	ORTHOMCL1833	ORTHOMCL1832
ORTHOMCL1827	ORTHOMCL1885	ORTHOMCL1832	ORTHOMCL1892	ORTHOMCL1830	ORTHOMCL1838	ORTHOMCL1837	ORTHOMCL1834	ORTHOMCL1828	ORTHOMCL1834	ORTHOMCL1833
ORTHOMCL1828	ORTHOMCL1886	ORTHOMCL1833	ORTHOMCL1893	ORTHOMCL1831	ORTHOMCL1839	ORTHOMCL1838	ORTHOMCL1835	ORTHOMCL1829	ORTHOMCL1835	ORTHOMCL1834
ORTHOMCL1829	ORTHOMCL1887	ORTHOMCL1834	ORTHOMCL1894	ORTHOMCL1832	ORTHOMCL1840	ORTHOMCL1839	ORTHOMCL1836	ORTHOMCL1830	ORTHOMCL1836	ORTHOMCL1835
ORTHOMCL1830	ORTHOMCL1888	ORTHOMCL1835	ORTHOMCL1895	ORTHOMCL1833	ORTHOMCL1841	ORTHOMCL1840	ORTHOMCL1837	ORTHOMCL1831	ORTHOMCL1837	ORTHOMCL1836
ORTHOMCL1831	ORTHOMCL1889	ORTHOMCL1836	ORTHOMCL1896	ORTHOMCL1834	ORTHOMCL1842	ORTHOMCL1841	ORTHOMCL1838	ORTHOMCL1832	ORTHOMCL1838	ORTHOMCL1837
ORTHOMCL1832	ORTHOMCL1890	ORTHOMCL1837	ORTHOMCL1897	ORTHOMCL1835	ORTHOMCL1843	ORTHOMCL1842	ORTHOMCL1839	ORTHOMCL1833	ORTHOMCL1839	ORTHOMCL1838
ORTHOMCL1833	ORTHOMCL1891	ORTHOMCL1838	ORTHOMCL1898	ORTHOMCL1836	ORTHOMCL1844	ORTHOMCL1843	ORTHOMCL1840	ORTHOMCL1834	ORTHOMCL1840	ORTHOMCL1839
ORTHOMCL1834	ORTHOMCL1892	ORTHOMCL1839	ORTHOMCL1899	ORTHOMCL1837	ORTHOMCL1845	ORTHOMCL1844	ORTHOMCL1841	ORTHOMCL1835	ORTHOMCL1841	ORTHOMCL1840
ORTHOMCL1835	ORTHOMCL1893	ORTHOMCL1840	ORTHOMCL1900	ORTHOMCL1838	ORTHOMCL1846	ORTHOMCL1845	ORTHOMCL1842	ORTHOMCL1836	ORTHOMCL1842	ORTHOMCL1841
ORTHOMCL1836	ORTHOMCL1894	ORTHOMCL1841	ORTHOMCL1901	ORTHOMCL1839	ORTHOMCL1847	ORTHOMCL1846	ORTHOMCL1843	ORTHOMCL1837	ORTHOMCL1843	ORTHOMCL1842
ORTHOMCL1837	ORTHOMCL1896	ORTHOMCL1842	ORTHOMCL1902	ORTHOMCL1840	ORTHOMCL1848	ORTHOMCL1847	ORTHOMCL1844	ORTHOMCL1838	ORTHOMCL1844	ORTHOMCL1843
ORTHOMCL1838	ORTHOMCL1897	ORTHOMCL1843	ORTHOMCL1903	ORTHOMCL1841	ORTHOMCL1849	ORTHOMCL1848	ORTHOMCL1845	ORTHOMCL1839	ORTHOMCL1845	ORTHOMCL1844
ORTHOMCL1839	ORTHOMCL1898	ORTHOMCL1844	ORTHOMCL1904	ORTHOMCL1842	ORTHOMCL1850	ORTHOMCL1850	ORTHOMCL1846	ORTHOMCL1840	ORTHOMCL1846	ORTHOMCL1845
ORTHOMCL1840	ORTHOMCL1899	ORTHOMCL1845	ORTHOMCL1905	ORTHOMCL1843	ORTHOMCL1851	ORTHOMCL1851	ORTHOMCL1847	ORTHOMCL1841	ORTHOMCL1847	ORTHOMCL1846
ORTHOMCL1841	ORTHOMCL1900	ORTHOMCL1846	ORTHOMCL1906	ORTHOMCL1844	ORTHOMCL1852	ORTHOMCL1852	ORTHOMCL1848	ORTHOMCL1842	ORTHOMCL1848	ORTHOMCL1847
ORTHOMCL1842	ORTHOMCL1901	ORTHOMCL1847	ORTHOMCL1907	ORTHOMCL1845	ORTHOMCL1853	ORTHOMCL1853	ORTHOMCL1849	ORTHOMCL1843	ORTHOMCL1849	ORTHOMCL1848
ORTHOMCL1843	ORTHOMCL1902	ORTHOMCL1848	ORTHOMCL1908	ORTHOMCL1846	ORTHOMCL1854	ORTHOMCL1854	ORTHOMCL1850	ORTHOMCL1844	ORTHOMCL1850	ORTHOMCL1849
ORTHOMCL1844	ORTHOMCL1903	ORTHOMCL1849	ORTHOMCL1909	ORTHOMCL1847	ORTHOMCL1855	ORTHOMCL1855	ORTHOMCL1851	ORTHOMCL1845	ORTHOMCL1851	ORTHOMCL1850
ORTHOMCL1845	ORTHOMCL1904	ORTHOMCL1850	ORTHOMCL1910	ORTHOMCL1848	ORTHOMCL1856	ORTHOMCL1856	ORTHOMCL1852	ORTHOMCL1846	ORTHOMCL1852	ORTHOMCL1851
ORTHOMCL1846	ORTHOMCL1905	ORTHOMCL1851	ORTHOMCL1911	ORTHOMCL1850	ORTHOMCL1857	ORTHOMCL1857	ORTHOMCL1853	ORTHOMCL1847	ORTHOMCL1853	ORTHOMCL1852
ORTHOMCL1847	ORTHOMCL1906	ORTHOMCL1852	ORTHOMCL1912	ORTHOMCL1851	ORTHOMCL1858	ORTHOMCL1858	ORTHOMCL1854	ORTHOMCL1848	ORTHOMCL1854	ORTHOMCL1853
ORTHOMCL1848	ORTHOMCL1907	ORTHOMCL1853	ORTHOMCL1913	ORTHOMCL1852	ORTHOMCL1859	ORTHOMCL1859	ORTHOMCL1855	ORTHOMCL1849	ORTHOMCL1855	ORTHOMCL1854
ORTHOMCL1849	ORTHOMCL1908	ORTHOMCL1854	ORTHOMCL1914	ORTHOMCL1853	ORTHOMCL1860	ORTHOMCL1860	ORTHOMCL1856	ORTHOMCL1850	ORTHOMCL1856	ORTHOMCL1855
ORTHOMCL1850	ORTHOMCL1909	ORTHOMCL1855	ORTHOMCL1915	ORTHOMCL1854	ORTHOMCL1861	ORTHOMCL1861	ORTHOMCL1857	ORTHOMCL1851	ORTHOMCL1857	ORTHOMCL1856
ORTHOMCL1851	ORTHOMCL1910	ORTHOMCL1856	ORTHOMCL1916	ORTHOMCL1855	ORTHOMCL1862	ORTHOMCL1862	ORTHOMCL1858	ORTHOMCL1852	ORTHOMCL1858	ORTHOMCL1857
ORTHOMCL1852	ORTHOMCL1911	ORTHOMCL1857	ORTHOMCL1917	ORTHOMCL1856	ORTHOMCL1863	ORTHOMCL1863	ORTHOMCL1859	ORTHOMCL1853	ORTHOMCL1859	ORTHOMCL1858
ORTHOMCL1853	ORTHOMCL1912	ORTHOMCL1858	ORTHOMCL1918	ORTHOMCL1857	ORTHOMCL1864	ORTHOMCL1864	ORTHOMCL1860	ORTHOMCL1854	ORTHOMCL1860	ORTHOMCL1859
ORTHOMCL1854	ORTHOMCL1913	ORTHOMCL1859	ORTHOMCL1919	ORTHOMCL1858	ORTHOMCL1865	ORTHOMCL1865	ORTHOMCL1861	ORTHOMCL1855	ORTHOMCL1861	ORTHOMCL1860
ORTHOMCL1855	ORTHOMCL1914	ORTHOMCL1860	ORTHOMCL1920	ORTHOMCL1859	ORTHOMCL1866	ORTHOMCL1866	ORTHOMCL1862	ORTHOMCL1856	ORTHOMCL1862	ORTHOMCL1861
ORTHOMCL1856	ORTHOMCL1915	ORTHOMCL1861	ORTHOMCL1921	ORTHOMCL1860	ORTHOMCL1867	ORTHOMCL1867	ORTHOMCL1863	ORTHOMCL1857	ORTHOMCL1863	ORTHOMCL1862
ORTHOMCL1857	ORTHOMCL1916	ORTHOMCL1862	ORTHOMCL1922	ORTHOMCL1861	ORTHOMCL1868	ORTHOMCL1868	ORTHOMCL1864	ORTHOMCL1858	ORTHOMCL1864	ORTHOMCL1863
ORTHOMCL1858	ORTHOMCL1917	ORTHOMCL1863	ORTHOMCL1923	ORTHOMCL1862	ORTHOMCL1869	ORTHOMCL1869	ORTHOMCL1865	ORTHOMCL1859	ORTHOMCL1865	ORTHOMCL1864
ORTHOMCL1859	ORTHOMCL1918	ORTHOMCL1864	ORTHOMCL1924	ORTHOMCL1863	ORTHOMCL1870	ORTHOMCL1870	ORTHOMCL1866	ORTHOMCL1860	ORTHOMCL1866	ORTHOMCL1865
ORTHOMCL1860	ORTHOMCL1919	ORTHOMCL1865	ORTHOMCL1925	ORTHOMCL1864	ORTHOMCL1871	ORTHOMCL1871	ORTHOMCL1867	ORTHOMCL1861	ORTHOMCL1867	ORTHOMCL1866
ORTHOMCL1861	ORTHOMCL1920	ORTHOMCL1866	ORTHOMCL1927	ORTHOMCL1865	ORTHOMCL1872	ORTHOMCL1872	ORTHOMCL1868	ORTHOMCL1862	ORTHOMCL1868	ORTHOMCL1867
ORTHOMCL1862	ORTHOMCL1921	ORTHOMCL1867	ORTHOMCL1928	ORTHOMCL1866	ORTHOMCL1873	ORTHOMCL1873	ORTHOMCL1869	ORTHOMCL1863	ORTHOMCL1869	ORTHOMCL1868
ORTHOMCL1863	ORTHOMCL1922	ORTHOMCL1868	ORTHOMCL1930	ORTHOMCL1867	ORTHOMCL1874	ORTHOMCL1874	ORTHOMCL1870	ORTHOMCL1864	ORTHOMCL1870	ORTHOMCL1869
ORTHOMCL1864	ORTHOMCL1923	ORTHOMCL1869	ORTHOMCL1931	ORTHOMCL1868	ORTHOMCL1875	ORTHOMCL1875	ORTHOMCL1871	ORTHOMCL1865	ORTHOMCL1871	ORTHOMCL1871
ORTHOMCL1865	ORTHOMCL1924	ORTHOMCL1870	ORTHOMCL1932	ORTHOMCL1869	ORTHOMCL1876	ORTHOMCL1876	ORTHOMCL1872	ORTHOMCL1866	ORTHOMCL1872	ORTHOMCL1872
ORTHOMCL1866	ORTHOMCL1925	ORTHOMCL1871	ORTHOMCL1933	ORTHOMCL1870	ORTHOMCL1877	ORTHOMCL1877	ORTHOMCL1873	ORTHOMCL1867	ORTHOMCL1873	ORTHOMCL1873
ORTHOMCL1867	ORTHOMCL1926	ORTHOMCL1872	ORTHOMCL1934	ORTHOMCL1871	ORTHOMCL1878	ORTHOMCL1878	ORTHOMCL1874	ORTHOMCL1868	ORTHOMCL1874	ORTHOMCL1874
ORTHOMCL1868	ORTHOMCL1927	ORTHOMCL1873	ORTHOMCL1935	ORTHOMCL1872	ORTHOMCL1879	ORTHOMCL1879	ORTHOMCL1875	ORTHOMCL1869	ORTHOMCL1875	ORTHOMCL1876
ORTHOMCL1869	ORTHOMCL1928	ORTHOMCL1874	ORTHOMCL1936	ORTHOMCL1874	ORTHOMCL1880	ORTHOMCL1880	ORTHOMCL1876	ORTHOMCL1870	ORTHOMCL1876	ORTHOMCL1877
ORTHOMCL1870	ORTHOMCL1929	ORTHOMCL1875	ORTHOMCL1937	ORTHOMCL1875	ORTHOMCL1881	ORTHOMCL1881	ORTHOMCL1877	ORTHOMCL1871	ORTHOMCL1877	ORTHOMCL1878
ORTHOMCL1871	ORTHOMCL1930	ORTHOMCL1876	ORTHOMCL1938	ORTHOMCL1876	ORTHOMCL1882	ORTHOMCL1882	ORTHOMCL1878	ORTHOMCL1872	ORTHOMCL1878	ORTHOMCL1879
ORTHOMCL1872	ORTHOMCL1931	ORTHOMCL1877	ORTHOMCL1939	ORTHOMCL1877	ORTHOMCL1883	ORTHOMCL1883	ORTHOMCL1879	ORTHOMCL1873	ORTHOMCL1879	ORTHOMCL1880
ORTHOMCL1873	ORTHOMCL1932	ORTHOMCL1878	ORTHOMCL1940	ORTHOMCL1878	ORTHOMCL1884	ORTHOMCL1884	ORTHOMCL1881	ORTHOMCL1874	ORTHOMCL1880	ORTHOMCL1881
ORTHOMCL1874	ORTHOMCL1933	ORTHOMCL1879	ORTHOMCL1941	ORTHOMCL1879	ORTHOMCL1885	ORTHOMCL1885	ORTHOMCL1882	ORTHOMCL1875	ORTHOMCL1881	ORTHOMCL1882
ORTHOMCL1875	ORTHOMCL1934	ORTHOMCL1880	ORTHOMCL1942	ORTHOMCL1880	ORTHOMCL1887	ORTHOMCL1886	ORTHOMCL1883	ORTHOMCL1876	ORTHOMCL1882	ORTHOMCL1883
ORTHOMCL1876	ORTHOMCL1935	ORTHOMCL1881	ORTHOMCL1943	ORTHOMCL1881	ORTHOMCL1888	ORTHOMCL1887	ORTHOMCL1884	ORTHOMCL1877	ORTHOMCL1883	ORTHOMCL1885
ORTHOMCL1877	ORTHOMCL1936	ORTHOMCL1882	ORTHOMCL1944	ORTHOMCL1882	ORTHOMCL1889	ORTHOMCL1888	ORTHOMCL1885	ORTHOMCL1878	ORTHOMCL1884	ORTHOMCL1886
ORTHOMCL1878	ORTHOMCL1938	ORTHOMCL1883	ORTHOMCL1945	ORTHOMCL1883	ORTHOMCL1890	ORTHOMCL1889	ORTHOMCL1886	ORTHOMCL1879	ORTHOMCL1885	ORTHOMCL1887
ORTHOMCL1879	ORTHOMCL1939	ORTHOMCL1884	ORTHOMCL1946	ORTHOMCL1884	ORTHOMCL1891	ORTHOMCL1890	ORTHOMCL1887	ORTHOMCL1880	ORTHOMCL1886	ORTHOMCL1888
ORTHOMCL1880	ORTHOMCL1941	ORTHOMCL1885	ORTHOMCL1947	ORTHOMCL1885	ORTHOMCL1892	ORTHOMCL1891	ORTHOMCL1888	ORTHOMCL1881	ORTHOMCL1887	ORTHOMCL1889
ORTHOMCL1881	ORTHOMCL1942	ORTHOMCL1886	ORTHOMCL1948	ORTHOMCL1886	ORTHOMCL1893	ORTHOMCL1892	ORTHOMCL1889	ORTHOMCL1882	ORTHOMCL1888	ORTHOMCL1890
ORTHOMCL1882	ORTHOMCL1943	ORTHOMCL1887	ORTHOMCL1949	ORTHOMCL1887	ORTHOMCL1894	ORTHOMCL1893	ORTHOMCL1890	ORTHOMCL1883	ORTHOMCL1889	ORTHOMCL1891
ORTHOMCL1883	ORTHOMCL1944	ORTHOMCL1888	ORTHOMCL1950	ORTHOMCL1888	ORTHOMCL1895	ORTHOMCL1894	ORTHOMCL1891	ORTHOMCL1884	ORTHOMCL1891	ORTHOMCL1892
ORTHOMCL1884	ORTHOMCL1945	ORTHOMCL1889	ORTHOMCL1951	ORTHOMCL1889	ORTHOMCL1896	ORTHOMCL1895	ORTHOMCL1892	ORTHOMCL1885	ORTHOMCL1892	ORTHOMCL1893
ORTHOMCL1885	ORTHOMCL1946	ORTHOMCL1891	ORTHOMCL1952	ORTHOMCL1890	ORTHOMCL1897	ORTHOMCL1896	ORTHOMCL1893	ORTHOMCL1886	ORTHOMCL1893	ORTHOMCL1894
ORTHOMCL1886	ORTHOMCL1947	ORTHOMCL1892	ORTHOMCL1953	ORTHOMCL1891	ORTHOMCL1898	ORTHOMCL1897	ORTHOMCL1894	ORTHOMCL1887	ORTHOMCL1894	ORTHOMCL1895
ORTHOMCL1887	ORTHOMCL1948	ORTHOMCL1893	ORTHOMCL1954	ORTHOMCL1892	ORTHOMCL1899	ORTHOMCL1898	ORTHOMCL1895	ORTHOMCL1888	ORTHOMCL1895	ORTHOMCL1896
ORTHOMCL1888	ORTHOMCL1949	ORTHOMCL1894	ORTHOMCL1955	ORTHOMCL1893	ORTHOMCL1900	ORTHOMCL1899	ORTHOMCL1896	ORTHOMCL1889	ORTHOMCL1896	ORTHOMCL1897
ORTHOMCL1889	ORTHOMCL1950	ORTHOMCL1895	ORTHOMCL1956	ORTHOMCL1894	ORTHOMCL1901	ORTHOMCL1900	ORTHOMCL1897	ORTHOMCL1890	ORTHOMCL1897	ORTHOMCL1898
ORTHOMCL1890	ORTHOMCL1951	ORTHOMCL1896	ORTHOMCL1957	ORTHOMCL1895	ORTHOMCL1902	ORTHOMCL1901	ORTHOMCL1898	ORTHOMCL1891	ORTHOMCL1898	ORTHOMCL1899
ORTHOMCL1891	ORTHOMCL1952	ORTHOMCL1897	ORTHOMCL1958	ORTHOMCL1896	ORTHOMCL1903	ORTHOMCL1902	ORTHOMCL1899	ORTHOMCL1892	ORTHOMCL1899	ORTHOMCL1900
ORTHOMCL1892	ORTHOMCL1953	ORTHOMCL1898	ORTHOMCL1959	ORTHOMCL1897	ORTHOMCL1904	ORTHOMCL1903	ORTHOMCL1900	ORTHOMCL1893	ORTHOMCL1900	ORTHOMCL1901
ORTHOMCL1893	ORTHOMCL1954	ORTHOMCL1899	ORTHOMCL1962	ORTHOMCL1898	ORTHOMCL1905	ORTHOMCL1904	ORTHOMCL1901	ORTHOMCL1894	ORTHOMCL1901	ORTHOMCL1902
ORTHOMCL1894	ORTHOMCL1955	ORTHOMCL1900	ORTHOMCL1963	ORTHOMCL1899	ORTHOMCL1906	ORTHOMCL1905	ORTHOMCL1902	ORTHOMCL1895	ORTHOMCL1902	ORTHOMCL1903
ORTHOMCL1895	ORTHOMCL1956	ORTHOMCL1901	ORTHOMCL1964	ORTHOMCL1900	ORTHOMCL1907	ORTHOMCL1906	ORTHOMCL1903	ORTHOMCL1896	ORTHOMCL1903	ORTHOMCL1904
ORTHOMCL1896	ORTHOMCL1957	ORTHOMCL1902	ORTHOMCL1965	ORTHOMCL1901	ORTHOMCL1908	ORTHOMCL1907	ORTHOMCL1904	ORTHOMCL1897	ORTHOMCL1904	ORTHOMCL1905
ORTHOMCL1897	ORTHOMCL1958	ORTHOMCL1903	ORTHOMCL1966	ORTHOMCL1902	ORTHOMCL1909	ORTHOMCL1908	ORTHOMCL1905	ORTHOMCL1898	ORTHOMCL1905	ORTHOMCL1906
ORTHOMCL1898	ORTHOMCL1959	ORTHOMCL1904	ORTHOMCL1967	ORTHOMCL1903	ORTHOMCL1910	ORTHOMCL1909	ORTHOMCL1906	ORTHOMCL1900	ORTHOMCL1906	ORTHOMCL1907
ORTHOMCL1899	ORTHOMCL1960	ORTHOMCL1905	ORTHOMCL1969	ORTHOMCL1904	ORTHOMCL1911	ORTHOMCL1910	ORTHOMCL1907	ORTHOMCL1901	ORTHOMCL1907	ORTHOMCL1908
ORTHOMCL1900	ORTHOMCL1961	ORTHOMCL1906	ORTHOMCL1970	ORTHOMCL1906	ORTHOMCL1912	ORTHOMCL1911	ORTHOMCL1908	ORTHOMCL1902	ORTHOMCL1908	ORTHOMCL1909
ORTHOMCL1901	ORTHOMCL1962	ORTHOMCL1907	ORTHOMCL1971	ORTHOMCL1907	ORTHOMCL1913	ORTHOMCL1912	ORTHOMCL1909	ORTHOMCL1903	ORTHOMCL1909	ORTHOMCL1910
ORTHOMCL1902	ORTHOMCL1963	ORTHOMCL1908	ORTHOMCL1972	ORTHOMCL1908	ORTHOMCL1914	ORTHOMCL1913	ORTHOMCL1910	ORTHOMCL1904	ORTHOMCL1910	ORTHOMCL1911
ORTHOMCL1903	ORTHOMCL1964	ORTHOMCL1909	ORTHOMCL1973	ORTHOMCL1909	ORTHOMCL1915	ORTHOMCL1914	ORTHOMCL1911	ORTHOMCL1905	ORTHOMCL1911	ORTHOMCL1912
ORTHOMCL1904	ORTHOMCL1965	ORTHOMCL1910	ORTHOMCL1974	ORTHOMCL1910	ORTHOMCL1916	ORTHOMCL1915	ORTHOMCL1912	ORTHOMCL1906	ORTHOMCL1912	ORTHOMCL1913
ORTHOMCL1905	ORTHOMCL1966	ORTHOMCL1911	ORTHOMCL1975	ORTHOMCL1911	ORTHOMCL1917	ORTHOMCL1916	ORTHOMCL1913	ORTHOMCL1907	ORTHOMCL1913	ORTHOMCL1914
ORTHOMCL1906	ORTHOMCL1967	ORTHOMCL1912	ORTHOMCL1976	ORTHOMCL1912	ORTHOMCL1918	ORTHOMCL1917	ORTHOMCL1914	ORTHOMCL1908	ORTHOMCL1914	ORTHOMCL1915
ORTHOMCL1907	ORTHOMCL1968	ORTHOMCL1913	ORTHOMCL1977	ORTHOMCL1913	ORTHOMCL1919	ORTHOMCL1918	ORTHOMCL1915	ORTHOMCL1909	ORTHOMCL1915	ORTHOMCL1916
ORTHOMCL1908	ORTHOMCL1969	ORTHOMCL1914	ORTHOMCL1978	ORTHOMCL1914	ORTHOMCL1920	ORTHOMCL1919	ORTHOMCL1916	ORTHOMCL1910	ORTHOMCL1916	ORTHOMCL1917
ORTHOMCL1909	ORTHOMCL1970	ORTHOMCL1915	ORTHOMCL1979	ORTHOMCL1915	ORTHOMCL1921	ORTHOMCL1920	ORTHOMCL1917	ORTHOMCL1911	ORTHOMCL1917	ORTHOMCL1918
ORTHOMCL1910	ORTHOMCL1971	ORTHOMCL1916	ORTHOMCL1980	ORTHOMCL1916	ORTHOMCL1922	ORTHOMCL1921	ORTHOMCL1918	ORTHOMCL1912	ORTHOMCL1918	ORTHOMCL1919
ORTHOMCL1911	ORTHOMCL1972	ORTHOMCL1917	ORTHOMCL1981	ORTHOMCL1917	ORTHOMCL1923	ORTHOMCL1922	ORTHOMCL1919	ORTHOMCL1913	ORTHOMCL1919	ORTHOMCL1920
ORTHOMCL1912	ORTHOMCL1973	ORTHOMCL1918	ORTHOMCL1982	ORTHOMCL1918	ORTHOMCL1924	ORTHOMCL1923	ORTHOMCL1920	ORTHOMCL1914	ORTHOMCL1920	ORTHOMCL1921
ORTHOMCL1913	ORTHOMCL1974	ORTHOMCL1919	ORTHOMCL1983	ORTHOMCL1919	ORTHOMCL1925	ORTHOMCL1924	ORTHOMCL1921	ORTHOMCL1915	ORTHOMCL1921	ORTHOMCL1922
ORTHOMCL1914	ORTHOMCL1975	ORTHOMCL1920	ORTHOMCL1984	ORTHOMCL1920	ORTHOMCL1926	ORTHOMCL1925	ORTHOMCL1922	ORTHOMCL1916	ORTHOMCL1922	ORTHOMCL1923
ORTHOMCL1915	ORTHOMCL1976	ORTHOMCL1921	ORTHOMCL1985	ORTHOMCL1921	ORTHOMCL1927	ORTHOMCL1926	ORTHOMCL1923	ORTHOMCL1917	ORTHOMCL1923	ORTHOMCL1924
ORTHOMCL1916	ORTHOMCL1977	ORTHOMCL1922	ORTHOMCL1986	ORTHOMCL1922	ORTHOMCL1928	ORTHOMCL1927	ORTHOMCL1924	ORTHOMCL1918	ORTHOMCL1924	ORTHOMCL1925
ORTHOMCL1917	ORTHOMCL1978	ORTHOMCL1923	ORTHOMCL1987	ORTHOMCL1923	ORTHOMCL1929	ORTHOMCL1928	ORTHOMCL1925	ORTHOMCL1919	ORTHOMCL1925	ORTHOMCL1926
ORTHOMCL1918	ORTHOMCL1979	ORTHOMCL1924	ORTHOMCL1988	ORTHOMCL1924	ORTHOMCL1930	ORTHOMCL1929	ORTHOMCL1926	ORTHOMCL1920	ORTHOMCL1926	ORTHOMCL1927
ORTHOMCL1919	ORTHOMCL1981	ORTHOMCL1925	ORTHOMCL1989	ORTHOMCL1925	ORTHOMCL1931	ORTHOMCL1930	ORTHOMCL1927	ORTHOMCL1921	ORTHOMCL1927	ORTHOMCL1928
ORTHOMCL1920	ORTHOMCL1982	ORTHOMCL1926	ORTHOMCL1990	ORTHOMCL1926	ORTHOMCL1932	ORTHOMCL1931	ORTHOMCL1928	ORTHOMCL1922	ORTHOMCL1928	ORTHOMCL1929
ORTHOMCL1921	ORTHOMCL1983	ORTHOMCL1927	ORTHOMCL1991	ORTHOMCL1927	ORTHOMCL1933	ORTHOMCL1932	ORTHOMCL1929	ORTHOMCL1923	ORTHOMCL1929	ORTHOMCL1930
ORTHOMCL1922	ORTHOMCL1984	ORTHOMCL1928	ORTHOMCL1992	ORTHOMCL1928	ORTHOMCL1934	ORTHOMCL1933	ORTHOMCL1930	ORTHOMCL1924	ORTHOMCL1930	ORTHOMCL1931
ORTHOMCL1923	ORTHOMCL1985	ORTHOMCL1929	ORTHOMCL1993	ORTHOMCL1929	ORTHOMCL1935	ORTHOMCL1934	ORTHOMCL1931	ORTHOMCL1925	ORTHOMCL1931	ORTHOMCL1932
ORTHOMCL1924	ORTHOMCL1986	ORTHOMCL1930	ORTHOMCL1995	ORTHOMCL1930	ORTHOMCL1936	ORTHOMCL1935	ORTHOMCL1932	ORTHOMCL1926	ORTHOMCL1932	ORTHOMCL1933
ORTHOMCL1925	ORTHOMCL1987	ORTHOMCL1931	ORTHOMCL1996	ORTHOMCL1931	ORTHOMCL1937	ORTHOMCL1936	ORTHOMCL1933	ORTHOMCL1927	ORTHOMCL1933	ORTHOMCL1934
ORTHOMCL1926	ORTHOMCL1988	ORTHOMCL1932	ORTHOMCL1997	ORTHOMCL1932	ORTHOMCL1938	ORTHOMCL1937	ORTHOMCL1934	ORTHOMCL1928	ORTHOMCL1934	ORTHOMCL1935
ORTHOMCL1927	ORTHOMCL1989	ORTHOMCL1933	ORTHOMCL1998	ORTHOMCL1933	ORTHOMCL1939	ORTHOMCL1938	ORTHOMCL1935	ORTHOMCL1929	ORTHOMCL1935	ORTHOMCL1936
ORTHOMCL1928	ORTHOMCL1990	ORTHOMCL1934	ORTHOMCL1999	ORTHOMCL1934	ORTHOMCL1940	ORTHOMCL1939	ORTHOMCL1936	ORTHOMCL1930	ORTHOMCL1936	ORTHOMCL1937
ORTHOMCL1929	ORTHOMCL1991	ORTHOMCL1935	ORTHOMCL2000	ORTHOMCL1935	ORTHOMCL1941	ORTHOMCL1940	ORTHOMCL1937	ORTHOMCL1931	ORTHOMCL1937	ORTHOMCL1938
ORTHOMCL1930	ORTHOMCL1992	ORTHOMCL1936	ORTHOMCL2001	ORTHOMCL1936	ORTHOMCL1942	ORTHOMCL1941	ORTHOMCL1938	ORTHOMCL1932	ORTHOMCL1938	ORTHOMCL1939
ORTHOMCL1931	ORTHOMCL1993	ORTHOMCL1937	ORTHOMCL2002	ORTHOMCL1937	ORTHOMCL1943	ORTHOMCL1942	ORTHOMCL1939	ORTHOMCL1933	ORTHOMCL1939	ORTHOMCL1940
ORTHOMCL1932	ORTHOMCL1994	ORTHOMCL1938	ORTHOMCL2003	ORTHOMCL1938	ORTHOMCL1944	ORTHOMCL1943	ORTHOMCL1940	ORTHOMCL1934	ORTHOMCL1940	ORTHOMCL1941
ORTHOMCL1933	ORTHOMCL1995	ORTHOMCL1939	ORTHOMCL2004	ORTHOMCL1939	ORTHOMCL1946	ORTHOMCL1944	ORTHOMCL1941	ORTHOMCL1935	ORTHOMCL1941	ORTHOMCL1942
ORTHOMCL1934	ORTHOMCL1996	ORTHOMCL1940	ORTHOMCL2005	ORTHOMCL1940	ORTHOMCL1947	ORTHOMCL1945	ORTHOMCL1942	ORTHOMCL1936	ORTHOMCL1942	ORTHOMCL1943
ORTHOMCL1935	ORTHOMCL1997	ORTHOMCL1941	ORTHOMCL2006	ORTHOMCL1941	ORTHOMCL1948	ORTHOMCL1946	ORTHOMCL1943	ORTHOMCL1937	ORTHOMCL1943	ORTHOMCL1944
ORTHOMCL1936	ORTHOMCL1998	ORTHOMCL1942	ORTHOMCL2007	ORTHOMCL1942	ORTHOMCL1949	ORTHOMCL1947	ORTHOMCL1944	ORTHOMCL1938	ORTHOMCL1944	ORTHOMCL1945
ORTHOMCL1937	ORTHOMCL1999	ORTHOMCL1943	ORTHOMCL2008	ORTHOMCL1943	ORTHOMCL1950	ORTHOMCL1948	ORTHOMCL1945	ORTHOMCL1939	ORTHOMCL1945	ORTHOMCL1946
ORTHOMCL1938	ORTHOMCL2000	ORTHOMCL1944	ORTHOMCL2009	ORTHOMCL1944	ORTHOMCL1951	ORTHOMCL1949	ORTHOMCL1946	ORTHOMCL1940	ORTHOMCL1946	ORTHOMCL1947
ORTHOMCL1939	ORTHOMCL2001	ORTHOMCL1945	ORTHOMCL2011	ORTHOMCL1945	ORTHOMCL1952	ORTHOMCL1950	ORTHOMCL1947	ORTHOMCL1941	ORTHOMCL1947	ORTHOMCL1948
ORTHOMCL1940	ORTHOMCL2002	ORTHOMCL1946	ORTHOMCL2012	ORTHOMCL1946	ORTHOMCL1953	ORTHOMCL1951	ORTHOMCL1948	ORTHOMCL1942	ORTHOMCL1948	ORTHOMCL1949
ORTHOMCL1941	ORTHOMCL2003	ORTHOMCL1947	ORTHOMCL2013	ORTHOMCL1947	ORTHOMCL1954	ORTHOMCL1952	ORTHOMCL1949	ORTHOMCL1943	ORTHOMCL1949	ORTHOMCL1950
ORTHOMCL1942	ORTHOMCL2004	ORTHOMCL1948	ORTHOMCL2014	ORTHOMCL1948	ORTHOMCL1955	ORTHOMCL1953	ORTHOMCL1950	ORTHOMCL1944	ORTHOMCL1950	ORTHOMCL1952
ORTHOMCL1943	ORTHOMCL2005	ORTHOMCL1949	ORTHOMCL2015	ORTHOMCL1949	ORTHOMCL1956	ORTHOMCL1954	ORTHOMCL1951	ORTHOMCL1945	ORTHOMCL1951	ORTHOMCL1953
ORTHOMCL1944	ORTHOMCL2006	ORTHOMCL1950	ORTHOMCL2016	ORTHOMCL1950	ORTHOMCL1957	ORTHOMCL1955	ORTHOMCL1952	ORTHOMCL1946	ORTHOMCL1952	ORTHOMCL1954
ORTHOMCL1945	ORTHOMCL2007	ORTHOMCL1951	ORTHOMCL2017	ORTHOMCL1952	ORTHOMCL1958	ORTHOMCL1956	ORTHOMCL1953	ORTHOMCL1947	ORTHOMCL1953	ORTHOMCL1955
ORTHOMCL1946	ORTHOMCL2008	ORTHOMCL1952	ORTHOMCL2018	ORTHOMCL1953	ORTHOMCL1959	ORTHOMCL1957	ORTHOMCL1954	ORTHOMCL1948	ORTHOMCL1954	ORTHOMCL1956
ORTHOMCL1947	ORTHOMCL2009	ORTHOMCL1954	ORTHOMCL2019	ORTHOMCL1954	ORTHOMCL1960	ORTHOMCL1958	ORTHOMCL1955	ORTHOMCL1949	ORTHOMCL1955	ORTHOMCL1957
ORTHOMCL1948	ORTHOMCL2010	ORTHOMCL1955	ORTHOMCL2022	ORTHOMCL1955	ORTHOMCL1962	ORTHOMCL1959	ORTHOMCL1956	ORTHOMCL1950	ORTHOMCL1956	ORTHOMCL1958
ORTHOMCL1949	ORTHOMCL2011	ORTHOMCL1956	ORTHOMCL2023	ORTHOMCL1956	ORTHOMCL1963	ORTHOMCL1960	ORTHOMCL1957	ORTHOMCL1951	ORTHOMCL1957	ORTHOMCL1961
ORTHOMCL1950	ORTHOMCL2012	ORTHOMCL1957	ORTHOMCL2024	ORTHOMCL1957	ORTHOMCL1964	ORTHOMCL1961	ORTHOMCL1958	ORTHOMCL1952	ORTHOMCL1958	ORTHOMCL1962
ORTHOMCL1951	ORTHOMCL2014	ORTHOMCL1958	ORTHOMCL2025	ORTHOMCL1958	ORTHOMCL1965	ORTHOMCL1962	ORTHOMCL1959	ORTHOMCL1953	ORTHOMCL1959	ORTHOMCL1963
ORTHOMCL1952	ORTHOMCL2015	ORTHOMCL1959	ORTHOMCL2027	ORTHOMCL1959	ORTHOMCL1966	ORTHOMCL1963	ORTHOMCL1960	ORTHOMCL1955	ORTHOMCL1960	ORTHOMCL1964
ORTHOMCL1953	ORTHOMCL2016	ORTHOMCL1960	ORTHOMCL2028	ORTHOMCL1960	ORTHOMCL1967	ORTHOMCL1964	ORTHOMCL1961	ORTHOMCL1956	ORTHOMCL1961	ORTHOMCL1965
ORTHOMCL1954	ORTHOMCL2017	ORTHOMCL1961	ORTHOMCL2029	ORTHOMCL1961	ORTHOMCL1968	ORTHOMCL1965	ORTHOMCL1962	ORTHOMCL1957	ORTHOMCL1962	ORTHOMCL1966
ORTHOMCL1955	ORTHOMCL2018	ORTHOMCL1962	ORTHOMCL2030	ORTHOMCL1962	ORTHOMCL1969	ORTHOMCL1966	ORTHOMCL1963	ORTHOMCL1958	ORTHOMCL1963	ORTHOMCL1967
ORTHOMCL1956	ORTHOMCL2019	ORTHOMCL1963	ORTHOMCL2031	ORTHOMCL1963	ORTHOMCL1970	ORTHOMCL1967	ORTHOMCL1964	ORTHOMCL1959	ORTHOMCL1964	ORTHOMCL1968
ORTHOMCL1957	ORTHOMCL2020	ORTHOMCL1964	ORTHOMCL2032	ORTHOMCL1964	ORTHOMCL1971	ORTHOMCL1968	ORTHOMCL1965	ORTHOMCL1960	ORTHOMCL1965	ORTHOMCL1969
ORTHOMCL1958	ORTHOMCL2022	ORTHOMCL1965	ORTHOMCL2033	ORTHOMCL1965	ORTHOMCL1972	ORTHOMCL1969	ORTHOMCL1966	ORTHOMCL1961	ORTHOMCL1966	ORTHOMCL1970
ORTHOMCL1959	ORTHOMCL2023	ORTHOMCL1966	ORTHOMCL2034	ORTHOMCL1966	ORTHOMCL1973	ORTHOMCL1970	ORTHOMCL1967	ORTHOMCL1962	ORTHOMCL1967	ORTHOMCL1971
ORTHOMCL1960	ORTHOMCL2024	ORTHOMCL1967	ORTHOMCL2035	ORTHOMCL1967	ORTHOMCL1974	ORTHOMCL1971	ORTHOMCL1968	ORTHOMCL1963	ORTHOMCL1968	ORTHOMCL1972
ORTHOMCL1961	ORTHOMCL2025	ORTHOMCL1968	ORTHOMCL2036	ORTHOMCL1968	ORTHOMCL1975	ORTHOMCL1972	ORTHOMCL1969	ORTHOMCL1964	ORTHOMCL1969	ORTHOMCL1973
ORTHOMCL1962	ORTHOMCL2026	ORTHOMCL1969	ORTHOMCL2038	ORTHOMCL1969	ORTHOMCL1976	ORTHOMCL1973	ORTHOMCL1970	ORTHOMCL1965	ORTHOMCL1970	ORTHOMCL1974
ORTHOMCL1963	ORTHOMCL2027	ORTHOMCL1970	ORTHOMCL2040	ORTHOMCL1970	ORTHOMCL1977	ORTHOMCL1974	ORTHOMCL1971	ORTHOMCL1966	ORTHOMCL1971	ORTHOMCL1976
ORTHOMCL1964	ORTHOMCL2028	ORTHOMCL1971	ORTHOMCL2041	ORTHOMCL1971	ORTHOMCL1978	ORTHOMCL1975	ORTHOMCL1972	ORTHOMCL1967	ORTHOMCL1972	ORTHOMCL1977
ORTHOMCL1965	ORTHOMCL2030	ORTHOMCL1972	ORTHOMCL2042	ORTHOMCL1972	ORTHOMCL1979	ORTHOMCL1976	ORTHOMCL1973	ORTHOMCL1968	ORTHOMCL1973	ORTHOMCL1978
ORTHOMCL1966	ORTHOMCL2031	ORTHOMCL1973	ORTHOMCL2043	ORTHOMCL1973	ORTHOMCL1980	ORTHOMCL1977	ORTHOMCL1974	ORTHOMCL1969	ORTHOMCL1974	ORTHOMCL1979
ORTHOMCL1967	ORTHOMCL2032	ORTHOMCL1974	ORTHOMCL2044	ORTHOMCL1974	ORTHOMCL1981	ORTHOMCL1978	ORTHOMCL1975	ORTHOMCL1970	ORTHOMCL1975	ORTHOMCL1980
ORTHOMCL1968	ORTHOMCL2033	ORTHOMCL1975	ORTHOMCL2045	ORTHOMCL1975	ORTHOMCL1982	ORTHOMCL1980	ORTHOMCL1976	ORTHOMCL1971	ORTHOMCL1976	ORTHOMCL1981
ORTHOMCL1969	ORTHOMCL2034	ORTHOMCL1976	ORTHOMCL2046	ORTHOMCL1977	ORTHOMCL1983	ORTHOMCL1981	ORTHOMCL1977	ORTHOMCL1972	ORTHOMCL1977	ORTHOMCL1982
ORTHOMCL1970	ORTHOMCL2035	ORTHOMCL1977	ORTHOMCL2047	ORTHOMCL1978	ORTHOMCL1984	ORTHOMCL1982	ORTHOMCL1978	ORTHOMCL1973	ORTHOMCL1978	ORTHOMCL1983
ORTHOMCL1971	ORTHOMCL2036	ORTHOMCL1978	ORTHOMCL2048	ORTHOMCL1979	ORTHOMCL1985	ORTHOMCL1983	ORTHOMCL1979	ORTHOMCL1974	ORTHOMCL1979	ORTHOMCL1984
ORTHOMCL1972	ORTHOMCL2038	ORTHOMCL1979	ORTHOMCL2049	ORTHOMCL1980	ORTHOMCL1986	ORTHOMCL1984	ORTHOMCL1980	ORTHOMCL1975	ORTHOMCL1980	ORTHOMCL1985
ORTHOMCL1973	ORTHOMCL2039	ORTHOMCL1980	ORTHOMCL2050	ORTHOMCL1981	ORTHOMCL1987	ORTHOMCL1985	ORTHOMCL1981	ORTHOMCL1976	ORTHOMCL1981	ORTHOMCL1986
ORTHOMCL1974	ORTHOMCL2040	ORTHOMCL1981	ORTHOMCL2051	ORTHOMCL1982	ORTHOMCL1988	ORTHOMCL1986	ORTHOMCL1982	ORTHOMCL1977	ORTHOMCL1982	ORTHOMCL1987
ORTHOMCL1975	ORTHOMCL2041	ORTHOMCL1982	ORTHOMCL2052	ORTHOMCL1983	ORTHOMCL1989	ORTHOMCL1987	ORTHOMCL1983	ORTHOMCL1978	ORTHOMCL1983	ORTHOMCL1988
ORTHOMCL1976	ORTHOMCL2042	ORTHOMCL1983	ORTHOMCL2053	ORTHOMCL1984	ORTHOMCL1990	ORTHOMCL1988	ORTHOMCL1984	ORTHOMCL1979	ORTHOMCL1984	ORTHOMCL1989
ORTHOMCL1977	ORTHOMCL2043	ORTHOMCL1984	ORTHOMCL2054	ORTHOMCL1985	ORTHOMCL1991	ORTHOMCL1989	ORTHOMCL1985	ORTHOMCL1980	ORTHOMCL1985	ORTHOMCL1990
ORTHOMCL1978	ORTHOMCL2044	ORTHOMCL1985	ORTHOMCL2055	ORTHOMCL1986	ORTHOMCL1992	ORTHOMCL1990	ORTHOMCL1986	ORTHOMCL1981	ORTHOMCL1986	ORTHOMCL1991
ORTHOMCL1979	ORTHOMCL2045	ORTHOMCL1986	ORTHOMCL2056	ORTHOMCL1987	ORTHOMCL1993	ORTHOMCL1991	ORTHOMCL1987	ORTHOMCL1982	ORTHOMCL1987	ORTHOMCL1992
ORTHOMCL1980	ORTHOMCL2046	ORTHOMCL1987	ORTHOMCL2057	ORTHOMCL1988	ORTHOMCL1994	ORTHOMCL1992	ORTHOMCL1988	ORTHOMCL1983	ORTHOMCL1988	ORTHOMCL1993
ORTHOMCL1981	ORTHOMCL2047	ORTHOMCL1988	ORTHOMCL2058	ORTHOMCL1989	ORTHOMCL1995	ORTHOMCL1994	ORTHOMCL1989	ORTHOMCL1984	ORTHOMCL1989	ORTHOMCL1995
ORTHOMCL1982	ORTHOMCL2048	ORTHOMCL1989	ORTHOMCL2059	ORTHOMCL1990	ORTHOMCL1996	ORTHOMCL1995	ORTHOMCL1990	ORTHOMCL1985	ORTHOMCL1990	ORTHOMCL1996
ORTHOMCL1983	ORTHOMCL2049	ORTHOMCL1991	ORTHOMCL2060	ORTHOMCL1991	ORTHOMCL1997	ORTHOMCL1996	ORTHOMCL1991	ORTHOMCL1986	ORTHOMCL1991	ORTHOMCL1997
ORTHOMCL1984	ORTHOMCL2050	ORTHOMCL1992	ORTHOMCL2061	ORTHOMCL1992	ORTHOMCL1998	ORTHOMCL1997	ORTHOMCL1992	ORTHOMCL1987	ORTHOMCL1992	ORTHOMCL1998
ORTHOMCL1985	ORTHOMCL2051	ORTHOMCL1993	ORTHOMCL2062	ORTHOMCL1993	ORTHOMCL1999	ORTHOMCL1998	ORTHOMCL1993	ORTHOMCL1988	ORTHOMCL1993	ORTHOMCL1999
ORTHOMCL1986	ORTHOMCL2052	ORTHOMCL1994	ORTHOMCL2064	ORTHOMCL1994	ORTHOMCL2001	ORTHOMCL1999	ORTHOMCL1995	ORTHOMCL1989	ORTHOMCL1994	ORTHOMCL2000
ORTHOMCL1987	ORTHOMCL2053	ORTHOMCL1995	ORTHOMCL2065	ORTHOMCL1995	ORTHOMCL2002	ORTHOMCL2000	ORTHOMCL1996	ORTHOMCL1990	ORTHOMCL1995	ORTHOMCL2001
ORTHOMCL1988	ORTHOMCL2054	ORTHOMCL1996	ORTHOMCL2066	ORTHOMCL1996	ORTHOMCL2003	ORTHOMCL2001	ORTHOMCL1997	ORTHOMCL1991	ORTHOMCL1996	ORTHOMCL2002
ORTHOMCL1989	ORTHOMCL2055	ORTHOMCL1997	ORTHOMCL2067	ORTHOMCL1997	ORTHOMCL2004	ORTHOMCL2002	ORTHOMCL1998	ORTHOMCL1992	ORTHOMCL1997	ORTHOMCL2003
ORTHOMCL1990	ORTHOMCL2057	ORTHOMCL1998	ORTHOMCL2068	ORTHOMCL1998	ORTHOMCL2005	ORTHOMCL2003	ORTHOMCL1999	ORTHOMCL1993	ORTHOMCL1998	ORTHOMCL2004
ORTHOMCL1991	ORTHOMCL2058	ORTHOMCL1999	ORTHOMCL2069	ORTHOMCL1999	ORTHOMCL2006	ORTHOMCL2004	ORTHOMCL2000	ORTHOMCL1994	ORTHOMCL1999	ORTHOMCL2005
ORTHOMCL1992	ORTHOMCL2059	ORTHOMCL2000	ORTHOMCL2070	ORTHOMCL2001	ORTHOMCL2007	ORTHOMCL2005	ORTHOMCL2001	ORTHOMCL1995	ORTHOMCL2000	ORTHOMCL2006
ORTHOMCL1993	ORTHOMCL2060	ORTHOMCL2001	ORTHOMCL2071	ORTHOMCL2002	ORTHOMCL2008	ORTHOMCL2006	ORTHOMCL2002	ORTHOMCL1996	ORTHOMCL2001	ORTHOMCL2007
ORTHOMCL1994	ORTHOMCL2061	ORTHOMCL2002	ORTHOMCL2074	ORTHOMCL2003	ORTHOMCL2009	ORTHOMCL2007	ORTHOMCL2003	ORTHOMCL1997	ORTHOMCL2002	ORTHOMCL2008
ORTHOMCL1995	ORTHOMCL2062	ORTHOMCL2003	ORTHOMCL2075	ORTHOMCL2004	ORTHOMCL2010	ORTHOMCL2008	ORTHOMCL2004	ORTHOMCL1998	ORTHOMCL2003	ORTHOMCL2009
ORTHOMCL1996	ORTHOMCL2063	ORTHOMCL2004	ORTHOMCL2076	ORTHOMCL2005	ORTHOMCL2011	ORTHOMCL2009	ORTHOMCL2005	ORTHOMCL1999	ORTHOMCL2004	ORTHOMCL2010
ORTHOMCL1997	ORTHOMCL2064	ORTHOMCL2005	ORTHOMCL2077	ORTHOMCL2006	ORTHOMCL2012	ORTHOMCL2010	ORTHOMCL2006	ORTHOMCL2000	ORTHOMCL2005	ORTHOMCL2011
ORTHOMCL1998	ORTHOMCL2065	ORTHOMCL2006	ORTHOMCL2078	ORTHOMCL2007	ORTHOMCL2013	ORTHOMCL2011	ORTHOMCL2007	ORTHOMCL2001	ORTHOMCL2006	ORTHOMCL2012
ORTHOMCL1999	ORTHOMCL2066	ORTHOMCL2007	ORTHOMCL2079	ORTHOMCL2008	ORTHOMCL2014	ORTHOMCL2012	ORTHOMCL2008	ORTHOMCL2002	ORTHOMCL2007	ORTHOMCL2013
ORTHOMCL2000	ORTHOMCL2067	ORTHOMCL2008	ORTHOMCL2080	ORTHOMCL2009	ORTHOMCL2015	ORTHOMCL2013	ORTHOMCL2009	ORTHOMCL2003	ORTHOMCL2008	ORTHOMCL2014
ORTHOMCL2001	ORTHOMCL2068	ORTHOMCL2009	ORTHOMCL2081	ORTHOMCL2010	ORTHOMCL2016	ORTHOMCL2014	ORTHOMCL2010	ORTHOMCL2004	ORTHOMCL2009	ORTHOMCL2015
ORTHOMCL2002	ORTHOMCL2069	ORTHOMCL2010	ORTHOMCL2082	ORTHOMCL2012	ORTHOMCL2017	ORTHOMCL2015	ORTHOMCL2011	ORTHOMCL2005	ORTHOMCL2010	ORTHOMCL2016
ORTHOMCL2003	ORTHOMCL2070	ORTHOMCL2012	ORTHOMCL2083	ORTHOMCL2013	ORTHOMCL2018	ORTHOMCL2016	ORTHOMCL2012	ORTHOMCL2006	ORTHOMCL2011	ORTHOMCL2017
ORTHOMCL2004	ORTHOMCL2071	ORTHOMCL2013	ORTHOMCL2085	ORTHOMCL2014	ORTHOMCL2019	ORTHOMCL2018	ORTHOMCL2013	ORTHOMCL2007	ORTHOMCL2012	ORTHOMCL2018
ORTHOMCL2005	ORTHOMCL2072	ORTHOMCL2014	ORTHOMCL2086	ORTHOMCL2015	ORTHOMCL2020	ORTHOMCL2019	ORTHOMCL2014	ORTHOMCL2008	ORTHOMCL2013	ORTHOMCL2019
ORTHOMCL2006	ORTHOMCL2074	ORTHOMCL2015	ORTHOMCL2087	ORTHOMCL2016	ORTHOMCL2021	ORTHOMCL2020	ORTHOMCL2015	ORTHOMCL2009	ORTHOMCL2014	ORTHOMCL2020
ORTHOMCL2007	ORTHOMCL2075	ORTHOMCL2016	ORTHOMCL2088	ORTHOMCL2017	ORTHOMCL2022	ORTHOMCL2021	ORTHOMCL2016	ORTHOMCL2010	ORTHOMCL2015	ORTHOMCL2022
ORTHOMCL2008	ORTHOMCL2076	ORTHOMCL2017	ORTHOMCL2089	ORTHOMCL2018	ORTHOMCL2023	ORTHOMCL2022	ORTHOMCL2018	ORTHOMCL2012	ORTHOMCL2016	ORTHOMCL2023
ORTHOMCL2009	ORTHOMCL2077	ORTHOMCL2018	ORTHOMCL2090	ORTHOMCL2019	ORTHOMCL2024	ORTHOMCL2023	ORTHOMCL2019	ORTHOMCL2013	ORTHOMCL2017	ORTHOMCL2024
ORTHOMCL2010	ORTHOMCL2078	ORTHOMCL2019	ORTHOMCL2091	ORTHOMCL2020	ORTHOMCL2025	ORTHOMCL2024	ORTHOMCL2020	ORTHOMCL2014	ORTHOMCL2019	ORTHOMCL2025
ORTHOMCL2011	ORTHOMCL2079	ORTHOMCL2020	ORTHOMCL2092	ORTHOMCL2021	ORTHOMCL2026	ORTHOMCL2025	ORTHOMCL2022	ORTHOMCL2015	ORTHOMCL2020	ORTHOMCL2026
ORTHOMCL2012	ORTHOMCL2080	ORTHOMCL2021	ORTHOMCL2094	ORTHOMCL2022	ORTHOMCL2027	ORTHOMCL2026	ORTHOMCL2023	ORTHOMCL2016	ORTHOMCL2021	ORTHOMCL2027
ORTHOMCL2013	ORTHOMCL2081	ORTHOMCL2022	ORTHOMCL2095	ORTHOMCL2023	ORTHOMCL2028	ORTHOMCL2027	ORTHOMCL2024	ORTHOMCL2017	ORTHOMCL2022	ORTHOMCL2028
ORTHOMCL2014	ORTHOMCL2082	ORTHOMCL2023	ORTHOMCL2096	ORTHOMCL2024	ORTHOMCL2029	ORTHOMCL2028	ORTHOMCL2025	ORTHOMCL2018	ORTHOMCL2023	ORTHOMCL2029
ORTHOMCL2015	ORTHOMCL2083	ORTHOMCL2024	ORTHOMCL2097	ORTHOMCL2025	ORTHOMCL2030	ORTHOMCL2029	ORTHOMCL2026	ORTHOMCL2019	ORTHOMCL2024	ORTHOMCL2030
ORTHOMCL2016	ORTHOMCL2084	ORTHOMCL2025	ORTHOMCL2098	ORTHOMCL2026	ORTHOMCL2031	ORTHOMCL2030	ORTHOMCL2027	ORTHOMCL2020	ORTHOMCL2025	ORTHOMCL2031
ORTHOMCL2018	ORTHOMCL2085	ORTHOMCL2026	ORTHOMCL2099	ORTHOMCL2027	ORTHOMCL2032	ORTHOMCL2031	ORTHOMCL2028	ORTHOMCL2021	ORTHOMCL2026	ORTHOMCL2032
[truncated: 29,684 more rows]
