# Supplementary material for: Comparative transcriptomics provides a strategy for phylogenetic analysis and SSR marker development in Chaenomeles
Source: Sci Rep. 2021 Aug 12;11:16441. doi: 10.1038/s41598-021-95776-z (PMC8361139; doi:10.1038/s41598-021-95776-z)
Supplement: Supplementary file 4 — Supplementary Table S3. [file 41598_2021_95776_MOESM4_ESM.xlsx]

## Sheet: DY
GO analysis result for single-copy genes in Docynia delavayi(DY)
GO ID	Description	out (2227)	All (7678)	pvalue	p.adjust	Genes
GO:0006807	nitrogen compound metabolic process	589	1572	2.38854e-16	3.37023e-13	Unigene0000054;Unigene0000079;Unigene0000138;Unigene0000144;Unigene0000145;Unigene0000150;Unigene0000160;Unigene0000180;Unigene0000220;Unigene0000279;Unigene0000282;Unigene0000341;Unigene0000429;Unigene0000448;Unigene0000454;Unigene0000473;Unigene0000494;Unigene0000532;Unigene0000545;Unigene0000677;Unigene0000689;Unigene0000859;Unigene0000868;Unigene0000922;Unigene0000997;Unigene0001005;Unigene00…
GO:1901360	organic cyclic compound metabolic process	515	1352	1.18947e-15	7.94169e-13	Unigene0000054;Unigene0000060;Unigene0000079;Unigene0000138;Unigene0000144;Unigene0000145;Unigene0000150;Unigene0000180;Unigene0000220;Unigene0000248;Unigene0000279;Unigene0000282;Unigene0000341;Unigene0000429;Unigene0000448;Unigene0000454;Unigene0000473;Unigene0000494;Unigene0000532;Unigene0000545;Unigene0000677;Unigene0000689;Unigene0000814;Unigene0000859;Unigene0000922;Unigene0000997;Unigene00…
GO:0046483	heterocycle metabolic process	488	1271	1.68852e-15	7.94169e-13	Unigene0000054;Unigene0000079;Unigene0000138;Unigene0000144;Unigene0000145;Unigene0000150;Unigene0000180;Unigene0000220;Unigene0000279;Unigene0000282;Unigene0000341;Unigene0000429;Unigene0000448;Unigene0000454;Unigene0000473;Unigene0000494;Unigene0000532;Unigene0000545;Unigene0000677;Unigene0000689;Unigene0000859;Unigene0000922;Unigene0000997;Unigene0001005;Unigene0001037;Unigene0001718;Unigene00…
GO:0034641	cellular nitrogen compound metabolic process	508	1342	7.96043e-15	2.80804e-12	Unigene0000054;Unigene0000079;Unigene0000138;Unigene0000144;Unigene0000145;Unigene0000150;Unigene0000160;Unigene0000180;Unigene0000220;Unigene0000279;Unigene0000282;Unigene0000341;Unigene0000429;Unigene0000448;Unigene0000454;Unigene0000473;Unigene0000494;Unigene0000532;Unigene0000545;Unigene0000677;Unigene0000689;Unigene0000859;Unigene0000922;Unigene0000997;Unigene0001005;Unigene0001037;Unigene00…
GO:0006725	cellular aromatic compound metabolic process	499	1318	1.47463e-14	4.16142e-12	Unigene0000054;Unigene0000060;Unigene0000079;Unigene0000138;Unigene0000144;Unigene0000145;Unigene0000150;Unigene0000180;Unigene0000220;Unigene0000279;Unigene0000282;Unigene0000341;Unigene0000429;Unigene0000448;Unigene0000454;Unigene0000473;Unigene0000494;Unigene0000532;Unigene0000545;Unigene0000677;Unigene0000689;Unigene0000814;Unigene0000859;Unigene0000922;Unigene0000997;Unigene0001005;Unigene00…
GO:0044281	small molecule metabolic process	393	1017	7.54237e-13	1.77371e-10	Unigene0000248;Unigene0000252;Unigene0000341;Unigene0000468;Unigene0000473;Unigene0000532;Unigene0000676;Unigene0000720;Unigene0000868;Unigene0001587;Unigene0001629;Unigene0001784;Unigene0002107;Unigene0002158;Unigene0002190;Unigene0002207;Unigene0002321;Unigene0002455;Unigene0002530;Unigene0002806;Unigene0002951;Unigene0003076;Unigene0003110;Unigene0003292;Unigene0003414;Unigene0003577;Unigene00…
GO:0006139	nucleobase-containing compound metabolic process	433	1153	6.46632e-12	1.30342e-09	Unigene0000054;Unigene0000079;Unigene0000138;Unigene0000144;Unigene0000145;Unigene0000150;Unigene0000180;Unigene0000220;Unigene0000279;Unigene0000282;Unigene0000341;Unigene0000429;Unigene0000448;Unigene0000454;Unigene0000473;Unigene0000494;Unigene0000532;Unigene0000545;Unigene0000677;Unigene0000689;Unigene0000859;Unigene0000922;Unigene0000997;Unigene0001005;Unigene0001037;Unigene0001718;Unigene00…
GO:0044238	primary metabolic process	1194	3683	1.44681e-10	2.55181e-08	Unigene0000048;Unigene0000051;Unigene0000054;Unigene0000060;Unigene0000071;Unigene0000075;Unigene0000079;Unigene0000099;Unigene0000101;Unigene0000138;Unigene0000144;Unigene0000145;Unigene0000146;Unigene0000148;Unigene0000150;Unigene0000160;Unigene0000168;Unigene0000180;Unigene0000208;Unigene0000220;Unigene0000229;Unigene0000230;Unigene0000236;Unigene0000248;Unigene0000252;Unigene0000279;Unigene00…
GO:1901564	organonitrogen compound metabolic process	280	711	2.8529e-10	4.47271e-08	Unigene0000160;Unigene0000341;Unigene0000473;Unigene0000532;Unigene0000868;Unigene0001375;Unigene0001587;Unigene0001629;Unigene0001655;Unigene0001784;Unigene0002107;Unigene0002158;Unigene0002207;Unigene0002321;Unigene0002757;Unigene0002806;Unigene0002821;Unigene0003076;Unigene0003414;Unigene0003577;Unigene0003687;Unigene0003990;Unigene0004021;Unigene0004052;Unigene0004077;Unigene0004194;Unigene00…
GO:0090304	nucleic acid metabolic process	360	956	4.28867e-10	6.05131e-08	Unigene0000054;Unigene0000079;Unigene0000144;Unigene0000145;Unigene0000150;Unigene0000180;Unigene0000220;Unigene0000279;Unigene0000282;Unigene0000341;Unigene0000429;Unigene0000448;Unigene0000454;Unigene0000494;Unigene0000545;Unigene0000677;Unigene0000689;Unigene0000859;Unigene0000922;Unigene0000997;Unigene0001005;Unigene0001037;Unigene0001718;Unigene0001824;Unigene0002116;Unigene0002141;Unigene00…
GO:0019752	carboxylic acid metabolic process	274	696	4.76614e-10	6.11365e-08	Unigene0000248;Unigene0000252;Unigene0000341;Unigene0000468;Unigene0000676;Unigene0000720;Unigene0000868;Unigene0001587;Unigene0001629;Unigene0001784;Unigene0002321;Unigene0002455;Unigene0002530;Unigene0002806;Unigene0003292;Unigene0003414;Unigene0003577;Unigene0003971;Unigene0003974;Unigene0003990;Unigene0004021;Unigene0004077;Unigene0004237;Unigene0004417;Unigene0004860;Unigene0004953;Unigene00…
GO:0006082	organic acid metabolic process	281	719	6.79631e-10	7.37661e-08	Unigene0000248;Unigene0000252;Unigene0000341;Unigene0000468;Unigene0000676;Unigene0000720;Unigene0000868;Unigene0001587;Unigene0001629;Unigene0001784;Unigene0002321;Unigene0002455;Unigene0002530;Unigene0002806;Unigene0003110;Unigene0003292;Unigene0003414;Unigene0003577;Unigene0003971;Unigene0003974;Unigene0003990;Unigene0004021;Unigene0004077;Unigene0004237;Unigene0004417;Unigene0004860;Unigene00…
GO:0043436	oxoacid metabolic process	281	719	6.79631e-10	7.37661e-08	Unigene0000248;Unigene0000252;Unigene0000341;Unigene0000468;Unigene0000676;Unigene0000720;Unigene0000868;Unigene0001587;Unigene0001629;Unigene0001784;Unigene0002321;Unigene0002455;Unigene0002530;Unigene0002806;Unigene0003110;Unigene0003292;Unigene0003414;Unigene0003577;Unigene0003971;Unigene0003974;Unigene0003990;Unigene0004021;Unigene0004077;Unigene0004237;Unigene0004417;Unigene0004860;Unigene00…
GO:0044710	single-organism metabolic process	770	2293	6.19247e-09	6.24112e-07	Unigene0000054;Unigene0000059;Unigene0000060;Unigene0000079;Unigene0000169;Unigene0000248;Unigene0000252;Unigene0000341;Unigene0000422;Unigene0000453;Unigene0000454;Unigene0000462;Unigene0000468;Unigene0000473;Unigene0000477;Unigene0000486;Unigene0000532;Unigene0000660;Unigene0000672;Unigene0000676;Unigene0000677;Unigene0000695;Unigene0000720;Unigene0000774;Unigene0000786;Unigene0000814;Unigene00…
GO:0071704	organic substance metabolic process	1435	4572	1.21203e-08	1.14012e-06	Unigene0000048;Unigene0000051;Unigene0000054;Unigene0000060;Unigene0000071;Unigene0000075;Unigene0000079;Unigene0000085;Unigene0000099;Unigene0000101;Unigene0000138;Unigene0000144;Unigene0000145;Unigene0000146;Unigene0000148;Unigene0000150;Unigene0000160;Unigene0000163;Unigene0000168;Unigene0000180;Unigene0000208;Unigene0000220;Unigene0000229;Unigene0000230;Unigene0000236;Unigene0000248;Unigene00…
GO:0044237	cellular metabolic process	1329	4207	2.0816e-08	1.83571e-06	Unigene0000048;Unigene0000051;Unigene0000054;Unigene0000060;Unigene0000079;Unigene0000099;Unigene0000101;Unigene0000138;Unigene0000144;Unigene0000145;Unigene0000146;Unigene0000150;Unigene0000160;Unigene0000168;Unigene0000180;Unigene0000208;Unigene0000220;Unigene0000229;Unigene0000230;Unigene0000236;Unigene0000248;Unigene0000252;Unigene0000279;Unigene0000282;Unigene0000338;Unigene0000340;Unigene00…
GO:0051186	cofactor metabolic process	90	188	2.48918e-08	2.06602e-06	Unigene0000248;Unigene0000532;Unigene0001784;Unigene0002321;Unigene0003414;Unigene0004077;Unigene0004237;Unigene0004594;Unigene0004953;Unigene0005050;Unigene0005326;Unigene0005581;Unigene0005644;Unigene0006097;Unigene0007164;Unigene0008241;Unigene0008560;Unigene0010296;Unigene0010384;Unigene0010581;Unigene0011776;Unigene0011828;Unigene0012115;Unigene0014466;Unigene0019192;Unigene0020193;Unigene00…
GO:0016070	RNA metabolic process	251	655	5.08265e-08	3.98423e-06	Unigene0000054;Unigene0000079;Unigene0000144;Unigene0000145;Unigene0000150;Unigene0000180;Unigene0000282;Unigene0000341;Unigene0000448;Unigene0000454;Unigene0000494;Unigene0000545;Unigene0000689;Unigene0000859;Unigene0000922;Unigene0000997;Unigene0001005;Unigene0001037;Unigene0001824;Unigene0002409;Unigene0002808;Unigene0002943;Unigene0003577;Unigene0003800;Unigene0003971;Unigene0004288;Unigene00…
GO:0032787	monocarboxylic acid metabolic process	143	347	4.40104e-07	3.26835e-05	Unigene0000248;Unigene0000252;Unigene0000341;Unigene0000676;Unigene0000720;Unigene0001784;Unigene0002455;Unigene0002530;Unigene0002806;Unigene0003292;Unigene0003414;Unigene0003971;Unigene0003974;Unigene0004237;Unigene0004417;Unigene0004860;Unigene0006375;Unigene0006727;Unigene0006746;Unigene0006933;Unigene0007164;Unigene0007217;Unigene0007358;Unigene0007693;Unigene0008337;Unigene0008569;Unigene00…
GO:0044271	cellular nitrogen compound biosynthetic process	211	552	8.17575e-07	5.76799e-05	Unigene0000054;Unigene0000079;Unigene0000144;Unigene0000150;Unigene0000160;Unigene0000180;Unigene0000282;Unigene0000341;Unigene0000454;Unigene0000473;Unigene0000494;Unigene0000532;Unigene0000689;Unigene0000859;Unigene0000922;Unigene0000997;Unigene0001005;Unigene0001375;Unigene0001655;Unigene0001824;Unigene0002107;Unigene0002207;Unigene0002821;Unigene0002943;Unigene0003317;Unigene0003687;Unigene00…
GO:1901566	organonitrogen compound biosynthetic process	171	441	3.53523e-06	0.000233763	Unigene0000160;Unigene0000341;Unigene0000473;Unigene0000532;Unigene0001375;Unigene0001587;Unigene0001655;Unigene0002107;Unigene0002207;Unigene0002821;Unigene0003577;Unigene0003687;Unigene0004021;Unigene0004052;Unigene0004077;Unigene0004194;Unigene0004445;Unigene0004751;Unigene0005050;Unigene0005187;Unigene0005360;Unigene0005581;Unigene0006075;Unigene0006358;Unigene0006680;Unigene0006876;Unigene00…
GO:0033013	tetrapyrrole metabolic process	37	66	3.64478e-06	0.000233763	Unigene0001784;Unigene0005050;Unigene0005360;Unigene0005581;Unigene0005644;Unigene0010384;Unigene0010581;Unigene0011776;Unigene0011828;Unigene0012115;Unigene0019192;Unigene0020193;Unigene0020845;Unigene0022384;Unigene0023650;Unigene0024224;Unigene0025888;Unigene0026803;Unigene0027576;Unigene0028707;Unigene0028715;Unigene0032177;Unigene0033633;Unigene0034134;Unigene0036004;Unigene0036106;Unigene00…
GO:0006520	cellular amino acid metabolic process	129	320	6.3228e-06	0.000354577	Unigene0000341;Unigene0000868;Unigene0001587;Unigene0001629;Unigene0001784;Unigene0002321;Unigene0002806;Unigene0003414;Unigene0003577;Unigene0003990;Unigene0004021;Unigene0004077;Unigene0004953;Unigene0005187;Unigene0005976;Unigene0006358;Unigene0006680;Unigene0006876;Unigene0007358;Unigene0007998;Unigene0008127;Unigene0008738;Unigene0009219;Unigene0009495;Unigene0010007;Unigene0010189;Unigene00…
GO:0009058	biosynthetic process	485	1435	6.56108e-06	0.000354577	Unigene0000054;Unigene0000060;Unigene0000079;Unigene0000144;Unigene0000146;Unigene0000150;Unigene0000160;Unigene0000180;Unigene0000248;Unigene0000252;Unigene0000282;Unigene0000341;Unigene0000422;Unigene0000454;Unigene0000473;Unigene0000494;Unigene0000532;Unigene0000689;Unigene0000690;Unigene0000786;Unigene0000859;Unigene0000922;Unigene0000997;Unigene0001005;Unigene0001322;Unigene0001344;Unigene00…
GO:1901362	organic cyclic compound biosynthetic process	179	469	6.56813e-06	0.000354577	Unigene0000054;Unigene0000060;Unigene0000079;Unigene0000144;Unigene0000150;Unigene0000180;Unigene0000248;Unigene0000282;Unigene0000341;Unigene0000454;Unigene0000473;Unigene0000494;Unigene0000532;Unigene0000689;Unigene0000859;Unigene0000922;Unigene0000997;Unigene0001005;Unigene0001824;Unigene0002107;Unigene0002207;Unigene0002943;Unigene0003317;Unigene0003687;Unigene0003800;Unigene0004052;Unigene00…
GO:0018130	heterocycle biosynthetic process	165	427	6.68649e-06	0.000354577	Unigene0000054;Unigene0000079;Unigene0000144;Unigene0000150;Unigene0000180;Unigene0000282;Unigene0000341;Unigene0000454;Unigene0000473;Unigene0000494;Unigene0000532;Unigene0000689;Unigene0000859;Unigene0000922;Unigene0000997;Unigene0001005;Unigene0001824;Unigene0002107;Unigene0002207;Unigene0002943;Unigene0003317;Unigene0003687;Unigene0003800;Unigene0004052;Unigene0004077;Unigene0004445;Unigene00…
GO:0009416	response to light stimulus	82	186	6.85091e-06	0.000354577	Unigene0000265;Unigene0000997;Unigene0002066;Unigene0002190;Unigene0002207;Unigene0002502;Unigene0002802;Unigene0003292;Unigene0003293;Unigene0003577;Unigene0004594;Unigene0004751;Unigene0007400;Unigene0007733;Unigene0007751;Unigene0007955;Unigene0008100;Unigene0008378;Unigene0008569;Unigene0009203;Unigene0010384;Unigene0010746;Unigene0011387;Unigene0014650;Unigene0014713;Unigene0015770;Unigene00…
GO:0006778	porphyrin-containing compound metabolic process	36	65	7.18094e-06	0.000354577	Unigene0001784;Unigene0005050;Unigene0005581;Unigene0005644;Unigene0010384;Unigene0010581;Unigene0011776;Unigene0011828;Unigene0012115;Unigene0019192;Unigene0020193;Unigene0020845;Unigene0022384;Unigene0023650;Unigene0024224;Unigene0025888;Unigene0026803;Unigene0027576;Unigene0028707;Unigene0028715;Unigene0032177;Unigene0033633;Unigene0034134;Unigene0036004;Unigene0036106;Unigene0036328;Unigene00…
GO:0009314	response to radiation	88	203	7.28754e-06	0.000354577	Unigene0000220;Unigene0000265;Unigene0000997;Unigene0002066;Unigene0002190;Unigene0002207;Unigene0002502;Unigene0002802;Unigene0003292;Unigene0003293;Unigene0003577;Unigene0004594;Unigene0004751;Unigene0007400;Unigene0007733;Unigene0007751;Unigene0007955;Unigene0008100;Unigene0008378;Unigene0008569;Unigene0009203;Unigene0010384;Unigene0010746;Unigene0011387;Unigene0014650;Unigene0014713;Unigene00…
GO:1901576	organic substance biosynthetic process	456	1346	1.03142e-05	0.000485112	Unigene0000054;Unigene0000060;Unigene0000079;Unigene0000144;Unigene0000146;Unigene0000150;Unigene0000160;Unigene0000180;Unigene0000248;Unigene0000252;Unigene0000282;Unigene0000341;Unigene0000422;Unigene0000454;Unigene0000473;Unigene0000494;Unigene0000532;Unigene0000689;Unigene0000690;Unigene0000786;Unigene0000859;Unigene0000922;Unigene0000997;Unigene0001005;Unigene0001322;Unigene0001344;Unigene00…
GO:0006732	coenzyme metabolic process	61	131	1.33879e-05	0.000609364	Unigene0000248;Unigene0000532;Unigene0002321;Unigene0003414;Unigene0004077;Unigene0004237;Unigene0004594;Unigene0004953;Unigene0005326;Unigene0006097;Unigene0007164;Unigene0008241;Unigene0008560;Unigene0010296;Unigene0010384;Unigene0014466;Unigene0020277;Unigene0020438;Unigene0020604;Unigene0020866;Unigene0021249;Unigene0021825;Unigene0022104;Unigene0022284;Unigene0022840;Unigene0023650;Unigene00…
GO:0019438	aromatic compound biosynthetic process	165	433	1.69445e-05	0.000739999	Unigene0000054;Unigene0000060;Unigene0000079;Unigene0000144;Unigene0000150;Unigene0000180;Unigene0000282;Unigene0000341;Unigene0000454;Unigene0000473;Unigene0000494;Unigene0000532;Unigene0000689;Unigene0000859;Unigene0000922;Unigene0000997;Unigene0001005;Unigene0001824;Unigene0002107;Unigene0002207;Unigene0002943;Unigene0003317;Unigene0003687;Unigene0003800;Unigene0004052;Unigene0004077;Unigene00…
GO:0034660	ncRNA metabolic process	81	187	1.73068e-05	0.000739999	Unigene0000054;Unigene0000448;Unigene0001037;Unigene0002808;Unigene0003800;Unigene0004641;Unigene0004882;Unigene0006680;Unigene0006876;Unigene0007482;Unigene0007818;Unigene0007995;Unigene0009219;Unigene0009321;Unigene0009383;Unigene0010313;Unigene0010986;Unigene0012519;Unigene0012975;Unigene0013191;Unigene0013636;Unigene0013825;Unigene0014255;Unigene0015000;Unigene0016201;Unigene0020958;Unigene00…
GO:0044249	cellular biosynthetic process	457	1356	1.86629e-05	0.000774512	Unigene0000054;Unigene0000060;Unigene0000079;Unigene0000144;Unigene0000146;Unigene0000150;Unigene0000160;Unigene0000180;Unigene0000252;Unigene0000282;Unigene0000341;Unigene0000422;Unigene0000454;Unigene0000473;Unigene0000494;Unigene0000532;Unigene0000689;Unigene0000690;Unigene0000786;Unigene0000859;Unigene0000922;Unigene0000997;Unigene0001005;Unigene0001322;Unigene0001375;Unigene0001518;Unigene00…
GO:0044711	single-organism biosynthetic process	185	495	2.03665e-05	0.00082106	Unigene0000054;Unigene0000060;Unigene0000248;Unigene0000252;Unigene0000341;Unigene0000473;Unigene0000532;Unigene0000786;Unigene0001344;Unigene0001587;Unigene0002107;Unigene0002190;Unigene0002207;Unigene0002448;Unigene0002667;Unigene0003110;Unigene0003414;Unigene0003466;Unigene0003577;Unigene0003687;Unigene0004021;Unigene0004077;Unigene0004445;Unigene0004751;Unigene0004953;Unigene0004996;Unigene00…
GO:1901361	organic cyclic compound catabolic process	24	41	7.3646e-05	0.00288651	Unigene0001784;Unigene0003577;Unigene0005644;Unigene0007400;Unigene0011851;Unigene0015000;Unigene0019192;Unigene0020193;Unigene0023131;Unigene0027576;Unigene0027684;Unigene0031626;Unigene0032177;Unigene0032988;Unigene0033276;Unigene0034134;Unigene0035100;Unigene0036173;Unigene0037429;Unigene0038573;Unigene0038897;Unigene0039668;Unigene0039928;Unigene0041518
GO:1901700	response to oxygen-containing compound	76	180	8.81425e-05	0.00320532	Unigene0000051;Unigene0001783;Unigene0002005;Unigene0002190;Unigene0002207;Unigene0002502;Unigene0002802;Unigene0003293;Unigene0004237;Unigene0004751;Unigene0005500;Unigene0007751;Unigene0008100;Unigene0008112;Unigene0009203;Unigene0009348;Unigene0010384;Unigene0010725;Unigene0010746;Unigene0010953;Unigene0011417;Unigene0011986;Unigene0012835;Unigene0013071;Unigene0013729;Unigene0014429;Unigene00…
GO:0044270	cellular nitrogen compound catabolic process	23	39	8.8595e-05	0.00320532	Unigene0001784;Unigene0003577;Unigene0005644;Unigene0007400;Unigene0011851;Unigene0015000;Unigene0019192;Unigene0020193;Unigene0023131;Unigene0027576;Unigene0027684;Unigene0031626;Unigene0032177;Unigene0032988;Unigene0033276;Unigene0034134;Unigene0035100;Unigene0036173;Unigene0037429;Unigene0038573;Unigene0038897;Unigene0039928;Unigene0041518
GO:0046700	heterocycle catabolic process	23	39	8.8595e-05	0.00320532	Unigene0001784;Unigene0003577;Unigene0005644;Unigene0007400;Unigene0011851;Unigene0015000;Unigene0019192;Unigene0020193;Unigene0023131;Unigene0027576;Unigene0027684;Unigene0031626;Unigene0032177;Unigene0032988;Unigene0033276;Unigene0034134;Unigene0035100;Unigene0036173;Unigene0037429;Unigene0038573;Unigene0038897;Unigene0039928;Unigene0041518
GO:0019439	aromatic compound catabolic process	22	37	0.000106306	0.00374996	Unigene0001784;Unigene0003577;Unigene0005644;Unigene0007400;Unigene0011851;Unigene0015000;Unigene0019192;Unigene0020193;Unigene0023131;Unigene0027576;Unigene0027684;Unigene0031626;Unigene0032177;Unigene0032988;Unigene0033276;Unigene0034134;Unigene0036173;Unigene0037429;Unigene0038573;Unigene0038897;Unigene0039928;Unigene0041518
GO:0051188	cofactor biosynthetic process	38	77	0.000123265	0.00424212	Unigene0000532;Unigene0004077;Unigene0004953;Unigene0005050;Unigene0005581;Unigene0010384;Unigene0010581;Unigene0011828;Unigene0012115;Unigene0020604;Unigene0021249;Unigene0021825;Unigene0022104;Unigene0022284;Unigene0022384;Unigene0023650;Unigene0024224;Unigene0025888;Unigene0026085;Unigene0027576;Unigene0028105;Unigene0028715;Unigene0033470;Unigene0033633;Unigene0033872;Unigene0035107;Unigene00…
GO:0009628	response to abiotic stimulus	145	387	0.000142088	0.0047699	Unigene0000220;Unigene0000265;Unigene0000341;Unigene0000474;Unigene0000480;Unigene0000997;Unigene0001783;Unigene0002066;Unigene0002190;Unigene0002207;Unigene0002211;Unigene0002332;Unigene0002502;Unigene0002802;Unigene0002943;Unigene0003292;Unigene0003293;Unigene0003577;Unigene0004594;Unigene0004751;Unigene0005002;Unigene0007090;Unigene0007400;Unigene0007733;Unigene0007751;Unigene0007955;Unigene00…
GO:0034654	nucleobase-containing compound biosynthetic process	141	375	0.000145362	0.0047699	Unigene0000054;Unigene0000079;Unigene0000144;Unigene0000150;Unigene0000180;Unigene0000282;Unigene0000341;Unigene0000454;Unigene0000473;Unigene0000494;Unigene0000532;Unigene0000689;Unigene0000859;Unigene0000922;Unigene0000997;Unigene0001005;Unigene0001824;Unigene0002107;Unigene0002207;Unigene0002943;Unigene0003317;Unigene0003687;Unigene0003800;Unigene0004052;Unigene0004445;Unigene0004751;Unigene00…
GO:0006787	porphyrin-containing compound catabolic process	11	14	0.000174089	0.00533998	Unigene0001784;Unigene0005644;Unigene0019192;Unigene0020193;Unigene0027576;Unigene0032177;Unigene0034134;Unigene0037429;Unigene0038573;Unigene0039928;Unigene0041518
GO:0033015	tetrapyrrole catabolic process	11	14	0.000174089	0.00533998	Unigene0001784;Unigene0005644;Unigene0019192;Unigene0020193;Unigene0027576;Unigene0032177;Unigene0034134;Unigene0037429;Unigene0038573;Unigene0039928;Unigene0041518
GO:0051187	cofactor catabolic process	11	14	0.000174089	0.00533998	Unigene0001784;Unigene0005644;Unigene0019192;Unigene0020193;Unigene0027576;Unigene0032177;Unigene0034134;Unigene0037429;Unigene0038573;Unigene0039928;Unigene0041518
GO:0055086	nucleobase-containing small molecule metabolic process	91	227	0.00018311	0.0054972	Unigene0000473;Unigene0000532;Unigene0002107;Unigene0002158;Unigene0002207;Unigene0003687;Unigene0004445;Unigene0004594;Unigene0004641;Unigene0004751;Unigene0007482;Unigene0008241;Unigene0008560;Unigene0008738;Unigene0009325;Unigene0009495;Unigene0009522;Unigene0009999;Unigene0010384;Unigene0011387;Unigene0011916;Unigene0014153;Unigene0014466;Unigene0014645;Unigene0014713;Unigene0017346;Unigene00…
GO:0008152	metabolic process	1807	6030	0.000190753	0.00560734	Unigene0000048;Unigene0000051;Unigene0000054;Unigene0000059;Unigene0000060;Unigene0000071;Unigene0000075;Unigene0000077;Unigene0000079;Unigene0000085;Unigene0000099;Unigene0000101;Unigene0000109;Unigene0000138;Unigene0000144;Unigene0000145;Unigene0000146;Unigene0000148;Unigene0000150;Unigene0000160;Unigene0000163;Unigene0000168;Unigene0000169;Unigene0000180;Unigene0000208;Unigene0000220;Unigene00…
GO:0009117	nucleotide metabolic process	80	196	0.000224008	0.00645052	Unigene0000473;Unigene0000532;Unigene0002107;Unigene0002207;Unigene0003687;Unigene0004445;Unigene0004594;Unigene0004641;Unigene0004751;Unigene0007482;Unigene0008241;Unigene0008560;Unigene0008738;Unigene0009325;Unigene0009522;Unigene0009999;Unigene0010384;Unigene0011387;Unigene0011916;Unigene0014153;Unigene0014466;Unigene0014645;Unigene0014713;Unigene0017346;Unigene0019902;Unigene0020866;Unigene00…
GO:1901605	alpha-amino acid metabolic process	63	148	0.000262412	0.00740009	Unigene0000868;Unigene0001587;Unigene0001784;Unigene0002321;Unigene0002806;Unigene0003990;Unigene0004021;Unigene0004077;Unigene0004953;Unigene0005976;Unigene0007358;Unigene0007998;Unigene0009495;Unigene0010007;Unigene0010189;Unigene0010360;Unigene0010384;Unigene0011540;Unigene0012428;Unigene0012639;Unigene0012835;Unigene0013071;Unigene0013506;Unigene0014690;Unigene0015845;Unigene0016472;Unigene00…
GO:0044248	cellular catabolic process	93	235	0.000267473	0.00740009	Unigene0000054;Unigene0000498;Unigene0000508;Unigene0000720;Unigene0001587;Unigene0001784;Unigene0003577;Unigene0003914;Unigene0004107;Unigene0004417;Unigene0004592;Unigene0005002;Unigene0005477;Unigene0005644;Unigene0006746;Unigene0007217;Unigene0007372;Unigene0007400;Unigene0007693;Unigene0008337;Unigene0010274;Unigene0010384;Unigene0011072;Unigene0011387;Unigene0011851;Unigene0012428;Unigene00…
GO:0044763	single-organism cellular process	891	2843	0.000310383	0.00842214	Unigene0000048;Unigene0000051;Unigene0000054;Unigene0000060;Unigene0000076;Unigene0000079;Unigene0000099;Unigene0000144;Unigene0000148;Unigene0000217;Unigene0000231;Unigene0000240;Unigene0000248;Unigene0000252;Unigene0000253;Unigene0000262;Unigene0000265;Unigene0000279;Unigene0000341;Unigene0000422;Unigene0000454;Unigene0000468;Unigene0000473;Unigene0000480;Unigene0000532;Unigene0000660;Unigene00…
GO:0032774	RNA biosynthetic process	99	254	0.000329053	0.00876025	Unigene0000054;Unigene0000079;Unigene0000144;Unigene0000150;Unigene0000180;Unigene0000282;Unigene0000341;Unigene0000454;Unigene0000494;Unigene0000689;Unigene0000859;Unigene0000922;Unigene0000997;Unigene0001005;Unigene0001824;Unigene0002943;Unigene0003800;Unigene0005121;Unigene0006998;Unigene0007955;Unigene0008114;Unigene0008131;Unigene0008738;Unigene0009306;Unigene0009383;Unigene0009707;Unigene00…
GO:0006753	nucleoside phosphate metabolic process	82	204	0.000338801	0.00885275	Unigene0000473;Unigene0000532;Unigene0002107;Unigene0002207;Unigene0003687;Unigene0004445;Unigene0004594;Unigene0004641;Unigene0004751;Unigene0007482;Unigene0008241;Unigene0008560;Unigene0008738;Unigene0009325;Unigene0009522;Unigene0009999;Unigene0010384;Unigene0011387;Unigene0011916;Unigene0014153;Unigene0014466;Unigene0014645;Unigene0014713;Unigene0017346;Unigene0019902;Unigene0020866;Unigene00…
GO:0044260	cellular macromolecule metabolic process	855	2729	0.000486663	0.0124851	Unigene0000048;Unigene0000051;Unigene0000054;Unigene0000060;Unigene0000079;Unigene0000099;Unigene0000101;Unigene0000138;Unigene0000144;Unigene0000145;Unigene0000146;Unigene0000150;Unigene0000160;Unigene0000168;Unigene0000180;Unigene0000208;Unigene0000220;Unigene0000229;Unigene0000230;Unigene0000236;Unigene0000279;Unigene0000282;Unigene0000338;Unigene0000340;Unigene0000341;Unigene0000422;Unigene00…
GO:0090567	reproductive shoot system development	36	76	0.000507932	0.0127798	Unigene0000079;Unigene0000265;Unigene0000480;Unigene0000660;Unigene0000999;Unigene0001824;Unigene0002141;Unigene0002332;Unigene0002448;Unigene0005594;Unigene0008378;Unigene0009203;Unigene0011527;Unigene0012461;Unigene0012869;Unigene0016772;Unigene0017340;Unigene0018339;Unigene0019902;Unigene0022473;Unigene0023428;Unigene0023749;Unigene0024341;Unigene0024936;Unigene0027212;Unigene0030343;Unigene00…
GO:0097659	nucleic acid-templated transcription	89	227	0.000516262	0.0127798	Unigene0000054;Unigene0000144;Unigene0000150;Unigene0000180;Unigene0000282;Unigene0000341;Unigene0000454;Unigene0000494;Unigene0000689;Unigene0000859;Unigene0000922;Unigene0000997;Unigene0001005;Unigene0001824;Unigene0002943;Unigene0003800;Unigene0005121;Unigene0006998;Unigene0007955;Unigene0008114;Unigene0008131;Unigene0009306;Unigene0009383;Unigene0009707;Unigene0010313;Unigene0010384;Unigene00…
GO:1901575	organic substance catabolic process	100	260	0.000533867	0.0129877	Unigene0000349;Unigene0000498;Unigene0000508;Unigene0000720;Unigene0001587;Unigene0001784;Unigene0003577;Unigene0003590;Unigene0003914;Unigene0004107;Unigene0004417;Unigene0005002;Unigene0005477;Unigene0005644;Unigene0005718;Unigene0006333;Unigene0006618;Unigene0006746;Unigene0007217;Unigene0007372;Unigene0007400;Unigene0007693;Unigene0008337;Unigene0010274;Unigene0010384;Unigene0011072;Unigene00…
GO:0048518	positive regulation of biological process	49	112	0.000580384	0.01388	Unigene0000060;Unigene0000101;Unigene0000284;Unigene0000739;Unigene0001294;Unigene0003160;Unigene0003292;Unigene0003906;Unigene0004992;Unigene0005532;Unigene0007955;Unigene0008856;Unigene0009203;Unigene0010725;Unigene0011689;Unigene0011805;Unigene0013071;Unigene0014407;Unigene0014429;Unigene0014540;Unigene0014877;Unigene0015655;Unigene0016079;Unigene0017445;Unigene0020037;Unigene0021029;Unigene00…
GO:0044699	single-organism process	1230	4017	0.000590459	0.0138856	Unigene0000048;Unigene0000051;Unigene0000054;Unigene0000059;Unigene0000060;Unigene0000076;Unigene0000077;Unigene0000079;Unigene0000099;Unigene0000144;Unigene0000148;Unigene0000167;Unigene0000169;Unigene0000217;Unigene0000230;Unigene0000231;Unigene0000240;Unigene0000248;Unigene0000252;Unigene0000253;Unigene0000262;Unigene0000265;Unigene0000279;Unigene0000341;Unigene0000422;Unigene0000453;Unigene00…
GO:0006733	oxidoreduction coenzyme metabolic process	32	66	0.000616074	0.0142505	Unigene0000532;Unigene0005326;Unigene0006097;Unigene0008241;Unigene0008560;Unigene0010384;Unigene0014466;Unigene0020866;Unigene0022840;Unigene0023650;Unigene0023891;Unigene0025870;Unigene0026256;Unigene0026395;Unigene0027576;Unigene0028105;Unigene0029579;Unigene0030369;Unigene0032390;Unigene0033014;Unigene0033470;Unigene0034588;Unigene0035501;Unigene0036832;Unigene0037260;Unigene0037800;Unigene00…
GO:0016072	rRNA metabolic process	39	85	0.000670417	0.0152574	Unigene0000054;Unigene0001037;Unigene0003800;Unigene0004641;Unigene0004882;Unigene0007482;Unigene0007995;Unigene0012975;Unigene0013636;Unigene0013825;Unigene0015000;Unigene0021851;Unigene0023650;Unigene0024224;Unigene0025101;Unigene0026085;Unigene0026253;Unigene0026256;Unigene0027576;Unigene0027684;Unigene0028475;Unigene0028715;Unigene0029333;Unigene0029639;Unigene0032996;Unigene0033001;Unigene00…
GO:0072524	pyridine-containing compound metabolic process	31	64	0.000761286	0.0170504	Unigene0000532;Unigene0004953;Unigene0008241;Unigene0008560;Unigene0010384;Unigene0014466;Unigene0020866;Unigene0021825;Unigene0022840;Unigene0023650;Unigene0023891;Unigene0025870;Unigene0026256;Unigene0027576;Unigene0029579;Unigene0030369;Unigene0032390;Unigene0033014;Unigene0033470;Unigene0034588;Unigene0035417;Unigene0035501;Unigene0036832;Unigene0037260;Unigene0037800;Unigene0038309;Unigene00…
GO:0006351	transcription, DNA-templated	87	224	0.000841414	0.0185506	Unigene0000054;Unigene0000144;Unigene0000150;Unigene0000180;Unigene0000282;Unigene0000341;Unigene0000454;Unigene0000494;Unigene0000689;Unigene0000859;Unigene0000922;Unigene0000997;Unigene0001005;Unigene0001824;Unigene0002943;Unigene0003800;Unigene0005121;Unigene0006998;Unigene0007955;Unigene0008114;Unigene0008131;Unigene0009306;Unigene0009383;Unigene0009707;Unigene0010313;Unigene0010384;Unigene00…
GO:0044255	cellular lipid metabolic process	128	350	0.00105391	0.0228779	Unigene0000054;Unigene0000060;Unigene0000248;Unigene0000252;Unigene0000676;Unigene0000786;Unigene0000976;Unigene0001320;Unigene0001728;Unigene0002667;Unigene0003414;Unigene0003971;Unigene0004237;Unigene0004417;Unigene0004860;Unigene0004996;Unigene0005500;Unigene0006157;Unigene0006746;Unigene0006837;Unigene0007217;Unigene0007693;Unigene0008337;Unigene0008569;Unigene0009156;Unigene0009348;Unigene00…
GO:1901615	organic hydroxy compound metabolic process	53	126	0.00109075	0.023319	Unigene0000248;Unigene0001784;Unigene0002190;Unigene0004953;Unigene0006727;Unigene0006746;Unigene0007164;Unigene0008569;Unigene0009203;Unigene0010296;Unigene0010384;Unigene0011417;Unigene0011679;Unigene0012117;Unigene0012963;Unigene0015492;Unigene0015518;Unigene0017613;Unigene0017984;Unigene0018115;Unigene0018646;Unigene0018696;Unigene0019712;Unigene0020193;Unigene0020277;Unigene0021708;Unigene00…
GO:0006950	response to stress	218	634	0.00122039	0.025701	Unigene0000051;Unigene0000060;Unigene0000248;Unigene0000265;Unigene0000341;Unigene0000474;Unigene0000720;Unigene0001718;Unigene0001783;Unigene0002207;Unigene0002211;Unigene0002332;Unigene0002502;Unigene0002625;Unigene0002802;Unigene0002881;Unigene0002943;Unigene0003293;Unigene0003386;Unigene0003577;Unigene0004223;Unigene0004751;Unigene0004996;Unigene0005002;Unigene0005477;Unigene0005489;Unigene00…
GO:0044282	small molecule catabolic process	25	50	0.00136298	0.0282818	Unigene0004417;Unigene0006746;Unigene0007217;Unigene0007693;Unigene0008337;Unigene0011072;Unigene0014384;Unigene0016388;Unigene0018387;Unigene0019680;Unigene0020808;Unigene0021833;Unigene0022556;Unigene0023785;Unigene0025923;Unigene0029579;Unigene0030913;Unigene0032177;Unigene0035100;Unigene0035419;Unigene0035509;Unigene0036660;Unigene0038753;Unigene0038795;Unigene0039731
GO:0006886	intracellular protein transport	73	186	0.00153234	0.0313353	Unigene0000020;Unigene0000473;Unigene0001294;Unigene0001518;Unigene0002157;Unigene0003800;Unigene0004417;Unigene0004592;Unigene0006237;Unigene0007693;Unigene0008100;Unigene0009203;Unigene0010313;Unigene0010384;Unigene0010725;Unigene0010961;Unigene0011072;Unigene0013071;Unigene0013236;Unigene0015718;Unigene0016388;Unigene0017354;Unigene0017613;Unigene0018036;Unigene0018646;Unigene0019537;Unigene00…
GO:0044723	single-organism carbohydrate metabolic process	78	201	0.00156881	0.0316226	Unigene0000422;Unigene0000720;Unigene0001009;Unigene0001344;Unigene0001518;Unigene0001587;Unigene0001696;Unigene0002951;Unigene0003292;Unigene0003466;Unigene0003906;Unigene0004274;Unigene0005743;Unigene0005783;Unigene0006324;Unigene0006727;Unigene0006746;Unigene0006825;Unigene0006941;Unigene0007216;Unigene0007372;Unigene0008948;Unigene0011329;Unigene0011387;Unigene0012428;Unigene0013312;Unigene00…
GO:0016054	organic acid catabolic process	24	48	0.00169013	0.0331218	Unigene0004417;Unigene0006746;Unigene0007217;Unigene0007693;Unigene0008337;Unigene0011072;Unigene0014384;Unigene0016388;Unigene0018387;Unigene0019680;Unigene0021833;Unigene0022556;Unigene0023785;Unigene0025923;Unigene0029579;Unigene0030913;Unigene0032177;Unigene0035100;Unigene0035419;Unigene0035509;Unigene0036660;Unigene0038753;Unigene0038795;Unigene0039731
GO:0046395	carboxylic acid catabolic process	24	48	0.00169013	0.0331218	Unigene0004417;Unigene0006746;Unigene0007217;Unigene0007693;Unigene0008337;Unigene0011072;Unigene0014384;Unigene0016388;Unigene0018387;Unigene0019680;Unigene0021833;Unigene0022556;Unigene0023785;Unigene0025923;Unigene0029579;Unigene0030913;Unigene0032177;Unigene0035100;Unigene0035419;Unigene0035509;Unigene0036660;Unigene0038753;Unigene0038795;Unigene0039731
GO:0006090	pyruvate metabolic process	57	140	0.00182348	0.0352455	Unigene0000341;Unigene0002530;Unigene0003292;Unigene0003971;Unigene0003974;Unigene0006375;Unigene0006933;Unigene0010384;Unigene0011828;Unigene0012030;Unigene0012115;Unigene0012835;Unigene0014466;Unigene0015710;Unigene0015718;Unigene0015789;Unigene0017692;Unigene0018646;Unigene0019207;Unigene0019575;Unigene0020866;Unigene0020913;Unigene0022035;Unigene0022572;Unigene0023650;Unigene0024224;Unigene00…
GO:0019637	organophosphate metabolic process	124	343	0.00203604	0.0384982	Unigene0000054;Unigene0000473;Unigene0000532;Unigene0000786;Unigene0001320;Unigene0002107;Unigene0002190;Unigene0002207;Unigene0003687;Unigene0003971;Unigene0004445;Unigene0004594;Unigene0004641;Unigene0004751;Unigene0006157;Unigene0006746;Unigene0006837;Unigene0007482;Unigene0008241;Unigene0008560;Unigene0008569;Unigene0008738;Unigene0009325;Unigene0009522;Unigene0009999;Unigene0010384;Unigene00…
GO:0018208	peptidyl-proline modification	5	5	0.00204633	0.0384982	Unigene0018725;Unigene0019902;Unigene0024936;Unigene0033633;Unigene0035412
GO:0016071	mRNA metabolic process	17	31	0.00224311	0.0416452	Unigene0002409;Unigene0003577;Unigene0007400;Unigene0009615;Unigene0010818;Unigene0011851;Unigene0013433;Unigene0013636;Unigene0015000;Unigene0023127;Unigene0023131;Unigene0026644;Unigene0032988;Unigene0033276;Unigene0033968;Unigene0034255;Unigene0036173
GO:0009987	cellular process	1635	5460	0.00230868	0.042275	Unigene0000048;Unigene0000051;Unigene0000054;Unigene0000060;Unigene0000076;Unigene0000079;Unigene0000099;Unigene0000101;Unigene0000138;Unigene0000144;Unigene0000145;Unigene0000146;Unigene0000148;Unigene0000150;Unigene0000160;Unigene0000168;Unigene0000180;Unigene0000208;Unigene0000217;Unigene0000220;Unigene0000229;Unigene0000230;Unigene0000231;Unigene0000236;Unigene0000238;Unigene0000240;Unigene00…
GO:0044265	cellular macromolecule catabolic process	61	153	0.00233696	0.042275	Unigene0000498;Unigene0000508;Unigene0000720;Unigene0001587;Unigene0003577;Unigene0003914;Unigene0004107;Unigene0005002;Unigene0005477;Unigene0007372;Unigene0007400;Unigene0010274;Unigene0010384;Unigene0011387;Unigene0011851;Unigene0012428;Unigene0012760;Unigene0015000;Unigene0016450;Unigene0020441;Unigene0021042;Unigene0021851;Unigene0021955;Unigene0022435;Unigene0022664;Unigene0022878;Unigene00…
GO:0009743	response to carbohydrate	31	68	0.00261083	0.0466314	Unigene0000051;Unigene0002005;Unigene0002190;Unigene0002207;Unigene0004237;Unigene0010384;Unigene0010746;Unigene0012835;Unigene0013071;Unigene0014429;Unigene0015770;Unigene0020764;Unigene0022435;Unigene0023428;Unigene0023647;Unigene0024747;Unigene0024936;Unigene0025235;Unigene0026071;Unigene0026080;Unigene0026256;Unigene0030343;Unigene0032177;Unigene0032988;Unigene0033633;Unigene0034255;Unigene00…
GO:0046907	intracellular transport	96	259	0.00268604	0.047375	Unigene0000020;Unigene0000473;Unigene0000474;Unigene0000999;Unigene0001294;Unigene0001518;Unigene0002157;Unigene0002977;Unigene0003800;Unigene0004417;Unigene0004592;Unigene0005477;Unigene0006237;Unigene0007693;Unigene0008100;Unigene0009203;Unigene0010313;Unigene0010384;Unigene0010725;Unigene0010961;Unigene0011072;Unigene0012657;Unigene0013071;Unigene0013236;Unigene0014197;Unigene0014713;Unigene00…
GO:0033014	tetrapyrrole biosynthetic process	20	39	0.00275176	0.0476843	Unigene0005050;Unigene0005360;Unigene0005581;Unigene0010384;Unigene0010581;Unigene0011828;Unigene0012115;Unigene0022384;Unigene0023650;Unigene0024224;Unigene0025888;Unigene0027576;Unigene0028715;Unigene0033633;Unigene0036004;Unigene0036328;Unigene0037800;Unigene0038963;Unigene0039597;Unigene0039874
GO:0016114	terpenoid biosynthetic process	16	29	0.00277117	0.0476843	Unigene0002667;Unigene0004996;Unigene0009156;Unigene0010384;Unigene0012115;Unigene0022940;Unigene0023650;Unigene0024918;Unigene0027576;Unigene0033607;Unigene0033971;Unigene0036106;Unigene0037800;Unigene0038963;Unigene0038969;Unigene0040783
GO:0008299	isoprenoid biosynthetic process	18	34	0.00282374	0.0480036	Unigene0002667;Unigene0004996;Unigene0009156;Unigene0010384;Unigene0012115;Unigene0022940;Unigene0023650;Unigene0024918;Unigene0027576;Unigene0033607;Unigene0033971;Unigene0036106;Unigene0036853;Unigene0037800;Unigene0038963;Unigene0038969;Unigene0039664;Unigene0040783
GO:0034613	cellular protein localization	76	199	0.00294781	0.0484145	Unigene0000020;Unigene0000473;Unigene0000685;Unigene0001294;Unigene0001518;Unigene0002157;Unigene0003800;Unigene0004417;Unigene0004592;Unigene0006237;Unigene0007693;Unigene0008100;Unigene0009203;Unigene0010313;Unigene0010384;Unigene0010725;Unigene0010961;Unigene0011072;Unigene0013071;Unigene0013236;Unigene0015718;Unigene0016388;Unigene0017354;Unigene0017613;Unigene0018036;Unigene0018646;Unigene00…
GO:0070727	cellular macromolecule localization	76	199	0.00294781	0.0484145	Unigene0000020;Unigene0000473;Unigene0000685;Unigene0001294;Unigene0001518;Unigene0002157;Unigene0003800;Unigene0004417;Unigene0004592;Unigene0006237;Unigene0007693;Unigene0008100;Unigene0009203;Unigene0010313;Unigene0010384;Unigene0010725;Unigene0010961;Unigene0011072;Unigene0013071;Unigene0013236;Unigene0015718;Unigene0016388;Unigene0017354;Unigene0017613;Unigene0018036;Unigene0018646;Unigene00…
GO:0006629	lipid metabolic process	146	415	0.00295085	0.0484145	Unigene0000054;Unigene0000060;Unigene0000248;Unigene0000252;Unigene0000341;Unigene0000676;Unigene0000786;Unigene0000916;Unigene0000976;Unigene0001320;Unigene0001728;Unigene0002667;Unigene0003414;Unigene0003971;Unigene0004237;Unigene0004417;Unigene0004860;Unigene0004996;Unigene0005500;Unigene0005772;Unigene0005848;Unigene0006107;Unigene0006157;Unigene0006746;Unigene0006837;Unigene0007164;Unigene00…
GO:0006720	isoprenoid metabolic process	30	66	0.00320937	0.0507206	Unigene0000060;Unigene0000976;Unigene0002667;Unigene0004996;Unigene0005500;Unigene0009156;Unigene0009608;Unigene0010384;Unigene0012115;Unigene0017003;Unigene0020438;Unigene0020973;Unigene0022940;Unigene0023650;Unigene0024918;Unigene0027576;Unigene0028369;Unigene0030917;Unigene0033607;Unigene0033971;Unigene0036106;Unigene0036438;Unigene0036853;Unigene0037319;Unigene0037699;Unigene0037800;Unigene00…
GO:0009062	fatty acid catabolic process	21	42	0.00323519	0.0507206	Unigene0004417;Unigene0006746;Unigene0007217;Unigene0007693;Unigene0008337;Unigene0011072;Unigene0014384;Unigene0016388;Unigene0018387;Unigene0021833;Unigene0022556;Unigene0023785;Unigene0025923;Unigene0030913;Unigene0032177;Unigene0035100;Unigene0035419;Unigene0036660;Unigene0038753;Unigene0038795;Unigene0039731
GO:0044242	cellular lipid catabolic process	21	42	0.00323519	0.0507206	Unigene0004417;Unigene0006746;Unigene0007217;Unigene0007693;Unigene0008337;Unigene0011072;Unigene0014384;Unigene0016388;Unigene0018387;Unigene0021833;Unigene0022556;Unigene0023785;Unigene0025923;Unigene0030913;Unigene0032177;Unigene0035100;Unigene0035419;Unigene0036660;Unigene0038753;Unigene0038795;Unigene0039731
GO:0072329	monocarboxylic acid catabolic process	21	42	0.00323519	0.0507206	Unigene0004417;Unigene0006746;Unigene0007217;Unigene0007693;Unigene0008337;Unigene0011072;Unigene0014384;Unigene0016388;Unigene0018387;Unigene0021833;Unigene0022556;Unigene0023785;Unigene0025923;Unigene0030913;Unigene0032177;Unigene0035100;Unigene0035419;Unigene0036660;Unigene0038753;Unigene0038795;Unigene0039731
GO:0051649	establishment of localization in cell	97	264	0.00347018	0.0538068	Unigene0000020;Unigene0000473;Unigene0000474;Unigene0000999;Unigene0001294;Unigene0001518;Unigene0002157;Unigene0002165;Unigene0002977;Unigene0003800;Unigene0004417;Unigene0004592;Unigene0005477;Unigene0006237;Unigene0007693;Unigene0008100;Unigene0009203;Unigene0010313;Unigene0010384;Unigene0010725;Unigene0010961;Unigene0011072;Unigene0012657;Unigene0013071;Unigene0013236;Unigene0014197;Unigene00…
GO:0009056	catabolic process	106	292	0.00359451	0.0548447	Unigene0000054;Unigene0000109;Unigene0000349;Unigene0000498;Unigene0000508;Unigene0000720;Unigene0001587;Unigene0001784;Unigene0003577;Unigene0003590;Unigene0003914;Unigene0004107;Unigene0004417;Unigene0004592;Unigene0005002;Unigene0005477;Unigene0005644;Unigene0005718;Unigene0006333;Unigene0006618;Unigene0006746;Unigene0007217;Unigene0007372;Unigene0007400;Unigene0007693;Unigene0008337;Unigene00…
GO:0019362	pyridine nucleotide metabolic process	28	61	0.00365372	0.0548447	Unigene0000532;Unigene0008241;Unigene0008560;Unigene0010384;Unigene0014466;Unigene0020866;Unigene0022840;Unigene0023650;Unigene0023891;Unigene0025870;Unigene0026256;Unigene0027576;Unigene0029579;Unigene0030369;Unigene0032390;Unigene0033014;Unigene0033470;Unigene0034588;Unigene0035501;Unigene0036832;Unigene0037260;Unigene0037800;Unigene0038309;Unigene0038363;Unigene0038963;Unigene0039436;Unigene00…
GO:0046496	nicotinamide nucleotide metabolic process	28	61	0.00365372	0.0548447	Unigene0000532;Unigene0008241;Unigene0008560;Unigene0010384;Unigene0014466;Unigene0020866;Unigene0022840;Unigene0023650;Unigene0023891;Unigene0025870;Unigene0026256;Unigene0027576;Unigene0029579;Unigene0030369;Unigene0032390;Unigene0033014;Unigene0033470;Unigene0034588;Unigene0035501;Unigene0036832;Unigene0037260;Unigene0037800;Unigene0038309;Unigene0038363;Unigene0038963;Unigene0039436;Unigene00…
GO:0006399	tRNA metabolic process	38	89	0.00385349	0.0572345	Unigene0002808;Unigene0006680;Unigene0006876;Unigene0007818;Unigene0009219;Unigene0010986;Unigene0012519;Unigene0012975;Unigene0013191;Unigene0014255;Unigene0016201;Unigene0020958;Unigene0021990;Unigene0022213;Unigene0024127;Unigene0025673;Unigene0026887;Unigene0027551;Unigene0027582;Unigene0027684;Unigene0030818;Unigene0033001;Unigene0034319;Unigene0034954;Unigene0035078;Unigene0036849;Unigene00…
GO:0009639	response to red or far red light	29	64	0.00394521	0.0579864	Unigene0002207;Unigene0007733;Unigene0007955;Unigene0008378;Unigene0010384;Unigene0011387;Unigene0014713;Unigene0015770;Unigene0019902;Unigene0022435;Unigene0023428;Unigene0023647;Unigene0023749;Unigene0024936;Unigene0029284;Unigene0029320;Unigene0030343;Unigene0032808;Unigene0033198;Unigene0033633;Unigene0033821;Unigene0033910;Unigene0034255;Unigene0035164;Unigene0037091;Unigene0037800;Unigene00…
GO:0016109	tetraterpenoid biosynthetic process	14	25	0.00422875	0.061513	Unigene0002667;Unigene0004996;Unigene0009156;Unigene0010384;Unigene0012115;Unigene0022940;Unigene0023650;Unigene0027576;Unigene0033607;Unigene0033971;Unigene0036106;Unigene0037800;Unigene0038963;Unigene0038969
GO:0009657	plastid organization	43	104	0.00451189	0.064962	Unigene0002165;Unigene0003800;Unigene0003903;Unigene0003971;Unigene0004594;Unigene0004882;Unigene0004996;Unigene0006998;Unigene0008731;Unigene0010313;Unigene0011805;Unigene0012975;Unigene0013825;Unigene0014466;Unigene0020082;Unigene0022607;Unigene0023513;Unigene0023650;Unigene0024224;Unigene0025101;Unigene0026085;Unigene0027053;Unigene0028450;Unigene0028456;Unigene0029259;Unigene0033001;Unigene00…
GO:0016441	posttranscriptional gene silencing	21	43	0.00461998	0.065193	Unigene0000079;Unigene0010296;Unigene0011489;Unigene0011527;Unigene0013636;Unigene0013811;Unigene0014931;Unigene0015718;Unigene0022382;Unigene0022473;Unigene0023647;Unigene0024137;Unigene0025428;Unigene0030772;Unigene0031349;Unigene0035006;Unigene0036774;Unigene0037750;Unigene0039250;Unigene0040086;Unigene0041289
GO:0048367	shoot system development	44	107	0.00462034	0.065193	Unigene0000079;Unigene0000265;Unigene0000480;Unigene0000660;Unigene0000999;Unigene0001824;Unigene0002141;Unigene0002207;Unigene0002332;Unigene0002448;Unigene0005086;Unigene0005500;Unigene0005594;Unigene0008378;Unigene0009203;Unigene0011527;Unigene0012461;Unigene0012869;Unigene0016772;Unigene0017340;Unigene0018339;Unigene0019902;Unigene0022435;Unigene0022473;Unigene0023428;Unigene0023749;Unigene00…
GO:0006779	porphyrin-containing compound biosynthetic process	19	38	0.0050073	0.0692676	Unigene0005050;Unigene0005581;Unigene0010384;Unigene0010581;Unigene0011828;Unigene0012115;Unigene0022384;Unigene0023650;Unigene0024224;Unigene0025888;Unigene0027576;Unigene0028715;Unigene0033633;Unigene0036004;Unigene0036328;Unigene0037800;Unigene0038963;Unigene0039597;Unigene0039874
GO:0009108	coenzyme biosynthetic process	19	38	0.0050073	0.0692676	Unigene0000532;Unigene0004077;Unigene0004953;Unigene0020604;Unigene0021249;Unigene0021825;Unigene0022104;Unigene0022284;Unigene0026085;Unigene0028105;Unigene0033470;Unigene0033872;Unigene0035107;Unigene0035279;Unigene0035417;Unigene0037260;Unigene0037418;Unigene0038206;Unigene0038363
GO:0050896	response to stimulus	414	1293	0.00510737	0.069363	Unigene0000051;Unigene0000060;Unigene0000079;Unigene0000220;Unigene0000248;Unigene0000265;Unigene0000341;Unigene0000454;Unigene0000462;Unigene0000474;Unigene0000480;Unigene0000677;Unigene0000695;Unigene0000720;Unigene0000784;Unigene0000887;Unigene0000992;Unigene0000997;Unigene0001294;Unigene0001320;Unigene0001696;Unigene0001718;Unigene0001783;Unigene0001824;Unigene0001952;Unigene0001953;Unigene00…
GO:0006721	terpenoid metabolic process	25	54	0.00511251	0.069363	Unigene0000976;Unigene0002667;Unigene0004996;Unigene0005500;Unigene0009156;Unigene0009608;Unigene0010384;Unigene0012115;Unigene0017003;Unigene0020973;Unigene0022940;Unigene0023650;Unigene0024918;Unigene0027576;Unigene0028369;Unigene0030917;Unigene0033607;Unigene0033971;Unigene0036106;Unigene0036438;Unigene0037319;Unigene0037800;Unigene0038963;Unigene0038969;Unigene0040783
GO:0016042	lipid catabolic process	22	46	0.0052045	0.0699386	Unigene0004417;Unigene0006746;Unigene0007217;Unigene0007693;Unigene0008337;Unigene0011072;Unigene0014384;Unigene0016388;Unigene0018387;Unigene0021833;Unigene0022556;Unigene0023785;Unigene0025923;Unigene0030913;Unigene0032177;Unigene0035100;Unigene0035419;Unigene0036660;Unigene0038753;Unigene0038795;Unigene0039668;Unigene0039731
GO:0051641	cellular localization	102	283	0.00540703	0.071548	Unigene0000020;Unigene0000217;Unigene0000473;Unigene0000474;Unigene0000685;Unigene0000999;Unigene0001294;Unigene0001518;Unigene0002157;Unigene0002165;Unigene0002977;Unigene0003800;Unigene0004417;Unigene0004592;Unigene0005477;Unigene0006237;Unigene0007693;Unigene0008100;Unigene0009203;Unigene0010313;Unigene0010384;Unigene0010725;Unigene0010961;Unigene0011072;Unigene0012657;Unigene0013071;Unigene00…
GO:0006401	RNA catabolic process	10	16	0.00542568	0.071548	Unigene0003577;Unigene0007400;Unigene0011851;Unigene0015000;Unigene0023131;Unigene0027684;Unigene0032988;Unigene0033276;Unigene0036173;Unigene0038897
GO:0009059	macromolecule biosynthetic process	288	880	0.00578509	0.0755812	Unigene0000054;Unigene0000060;Unigene0000079;Unigene0000144;Unigene0000146;Unigene0000150;Unigene0000160;Unigene0000180;Unigene0000282;Unigene0000341;Unigene0000422;Unigene0000454;Unigene0000494;Unigene0000689;Unigene0000690;Unigene0000859;Unigene0000922;Unigene0000997;Unigene0001005;Unigene0001322;Unigene0001344;Unigene0001375;Unigene0001518;Unigene0001655;Unigene0001696;Unigene0001824;Unigene00…
GO:0044712	single-organism catabolic process	27	60	0.00596196	0.0771774	Unigene0004417;Unigene0006746;Unigene0007217;Unigene0007693;Unigene0008337;Unigene0011072;Unigene0014384;Unigene0016388;Unigene0018387;Unigene0019680;Unigene0020808;Unigene0021833;Unigene0022556;Unigene0023785;Unigene0025923;Unigene0029579;Unigene0030913;Unigene0031626;Unigene0032177;Unigene0035100;Unigene0035419;Unigene0035509;Unigene0036660;Unigene0038753;Unigene0038795;Unigene0039668;Unigene00…
GO:0051252	regulation of RNA metabolic process	72	192	0.00626515	0.0803648	Unigene0000054;Unigene0000180;Unigene0000282;Unigene0000341;Unigene0000454;Unigene0000494;Unigene0000859;Unigene0000922;Unigene0000997;Unigene0001005;Unigene0001824;Unigene0002943;Unigene0003800;Unigene0006998;Unigene0007955;Unigene0008114;Unigene0008131;Unigene0009306;Unigene0009707;Unigene0010313;Unigene0010384;Unigene0010801;Unigene0010818;Unigene0011100;Unigene0011139;Unigene0011489;Unigene00…
GO:0016108	tetraterpenoid metabolic process	14	26	0.00674488	0.085739	Unigene0002667;Unigene0004996;Unigene0009156;Unigene0010384;Unigene0012115;Unigene0022940;Unigene0023650;Unigene0027576;Unigene0033607;Unigene0033971;Unigene0036106;Unigene0037800;Unigene0038963;Unigene0038969
GO:0035601	protein deacylation	4	4	0.00706411	0.0889951	Unigene0004300;Unigene0006324;Unigene0039109;Unigene0039686
GO:0033043	regulation of organelle organization	22	47	0.00714899	0.0892675	Unigene0000054;Unigene0000338;Unigene0000454;Unigene0000677;Unigene0014407;Unigene0017529;Unigene0017608;Unigene0020441;Unigene0022473;Unigene0023388;Unigene0024469;Unigene0024936;Unigene0026263;Unigene0032074;Unigene0032769;Unigene0034666;Unigene0035478;Unigene0037081;Unigene0037091;Unigene0037701;Unigene0038166;Unigene0040010
GO:1902582	single-organism intracellular transport	70	187	0.00730357	0.0903977	Unigene0000473;Unigene0001518;Unigene0002157;Unigene0003800;Unigene0004417;Unigene0004592;Unigene0005477;Unigene0006237;Unigene0007693;Unigene0008100;Unigene0009203;Unigene0010313;Unigene0010384;Unigene0010725;Unigene0010961;Unigene0011072;Unigene0012657;Unigene0013071;Unigene0013236;Unigene0014197;Unigene0014713;Unigene0015718;Unigene0016287;Unigene0016388;Unigene0017613;Unigene0018036;Unigene00…
GO:0006605	protein targeting	57	148	0.00755168	0.0926558	Unigene0000473;Unigene0001518;Unigene0002157;Unigene0003800;Unigene0004417;Unigene0004592;Unigene0006237;Unigene0007693;Unigene0008100;Unigene0009203;Unigene0010313;Unigene0010384;Unigene0010725;Unigene0010961;Unigene0011072;Unigene0013071;Unigene0013236;Unigene0015718;Unigene0016388;Unigene0017613;Unigene0018036;Unigene0018646;Unigene0019537;Unigene0020866;Unigene0021833;Unigene0022556;Unigene00…
GO:0009081	branched-chain amino acid metabolic process	13	24	0.00840349	0.100752	Unigene0001587;Unigene0001784;Unigene0003990;Unigene0004021;Unigene0012428;Unigene0021648;Unigene0022001;Unigene0022572;Unigene0029579;Unigene0032390;Unigene0034265;Unigene0041485;Unigene0042070
GO:2001141	regulation of RNA biosynthetic process	70	188	0.00840781	0.100752	Unigene0000054;Unigene0000180;Unigene0000282;Unigene0000341;Unigene0000454;Unigene0000494;Unigene0000859;Unigene0000922;Unigene0000997;Unigene0001005;Unigene0001824;Unigene0002943;Unigene0003800;Unigene0006998;Unigene0007955;Unigene0008114;Unigene0008131;Unigene0009306;Unigene0009707;Unigene0010313;Unigene0010384;Unigene0010801;Unigene0011100;Unigene0011139;Unigene0011489;Unigene0011916;Unigene00…
GO:0006739	NADP metabolic process	24	53	0.00842572	0.100752	Unigene0008241;Unigene0008560;Unigene0010384;Unigene0014466;Unigene0020866;Unigene0022840;Unigene0023650;Unigene0023891;Unigene0025870;Unigene0026256;Unigene0027576;Unigene0029579;Unigene0030369;Unigene0032390;Unigene0033014;Unigene0034588;Unigene0035501;Unigene0036832;Unigene0037800;Unigene0038309;Unigene0038963;Unigene0039436;Unigene0039928;Unigene0042070
GO:0031347	regulation of defense response	7	10	0.00862007	0.102209	Unigene0008112;Unigene0020037;Unigene0025775;Unigene0031751;Unigene0033821;Unigene0035164;Unigene0041211
GO:0008104	protein localization	132	382	0.00904985	0.105525	Unigene0000020;Unigene0000473;Unigene0000685;Unigene0000695;Unigene0000720;Unigene0001294;Unigene0001498;Unigene0001518;Unigene0002157;Unigene0002215;Unigene0002802;Unigene0002879;Unigene0002951;Unigene0003434;Unigene0003800;Unigene0004005;Unigene0004321;Unigene0004417;Unigene0004592;Unigene0005594;Unigene0006237;Unigene0007216;Unigene0007693;Unigene0008100;Unigene0009203;Unigene0010289;Unigene00…
GO:0045184	establishment of protein localization	97	272	0.0091692	0.105525	Unigene0000020;Unigene0000473;Unigene0000685;Unigene0000695;Unigene0000720;Unigene0001294;Unigene0001498;Unigene0001518;Unigene0002157;Unigene0002951;Unigene0003800;Unigene0004005;Unigene0004417;Unigene0004592;Unigene0006237;Unigene0007693;Unigene0008100;Unigene0009203;Unigene0010313;Unigene0010384;Unigene0010725;Unigene0010961;Unigene0011072;Unigene0013071;Unigene0013236;Unigene0015718;Unigene00…
GO:0006188	IMP biosynthetic process	6	8	0.00940063	0.105525	Unigene0002207;Unigene0003687;Unigene0022679;Unigene0034015;Unigene0035073;Unigene0041484
GO:0006551	leucine metabolic process	6	8	0.00940063	0.105525	Unigene0001784;Unigene0003990;Unigene0021648;Unigene0022001;Unigene0034265;Unigene0041485
GO:0046040	IMP metabolic process	6	8	0.00940063	0.105525	Unigene0002207;Unigene0003687;Unigene0022679;Unigene0034015;Unigene0035073;Unigene0041484
GO:0006996	organelle organization	218	659	0.00952753	0.105525	Unigene0000054;Unigene0000079;Unigene0000217;Unigene0000238;Unigene0000253;Unigene0000279;Unigene0000338;Unigene0000341;Unigene0000454;Unigene0000660;Unigene0000677;Unigene0000685;Unigene0000690;Unigene0000695;Unigene0000720;Unigene0000774;Unigene0000857;Unigene0000922;Unigene0000938;Unigene0001284;Unigene0001518;Unigene0001587;Unigene0002141;Unigene0002165;Unigene0002215;Unigene0002272;Unigene00…
GO:0006281	DNA repair	26	59	0.00955709	0.105525	Unigene0001718;Unigene0007450;Unigene0007955;Unigene0011916;Unigene0012869;Unigene0014074;Unigene0014704;Unigene0020901;Unigene0020948;Unigene0021883;Unigene0022473;Unigene0023247;Unigene0023497;Unigene0023579;Unigene0026572;Unigene0027780;Unigene0028263;Unigene0030998;Unigene0034534;Unigene0035514;Unigene0037103;Unigene0037439;Unigene0038753;Unigene0039004;Unigene0039274;Unigene0040885
GO:0003006	developmental process involved in reproduction	109	310	0.00961991	0.105525	Unigene0000054;Unigene0000079;Unigene0000265;Unigene0000473;Unigene0000480;Unigene0000660;Unigene0000685;Unigene0000922;Unigene0000938;Unigene0000999;Unigene0001518;Unigene0001824;Unigene0002066;Unigene0002141;Unigene0002207;Unigene0002269;Unigene0002332;Unigene0002448;Unigene0002625;Unigene0004077;Unigene0005002;Unigene0005594;Unigene0006047;Unigene0007164;Unigene0007400;Unigene0008378;Unigene00…
GO:1901565	organonitrogen compound catabolic process	16	32	0.00971795	0.105525	Unigene0001784;Unigene0005644;Unigene0006333;Unigene0019192;Unigene0019680;Unigene0020193;Unigene0027576;Unigene0029579;Unigene0032177;Unigene0034134;Unigene0035100;Unigene0035509;Unigene0037429;Unigene0038573;Unigene0039928;Unigene0041518
GO:0006355	regulation of transcription, DNA-templated	69	186	0.00972233	0.105525	Unigene0000054;Unigene0000180;Unigene0000282;Unigene0000341;Unigene0000454;Unigene0000494;Unigene0000859;Unigene0000922;Unigene0000997;Unigene0001005;Unigene0001824;Unigene0002943;Unigene0003800;Unigene0006998;Unigene0007955;Unigene0008114;Unigene0008131;Unigene0009306;Unigene0009707;Unigene0010313;Unigene0010384;Unigene0010801;Unigene0011100;Unigene0011139;Unigene0011489;Unigene0011916;Unigene00…
GO:1903506	regulation of nucleic acid-templated transcription	69	186	0.00972233	0.105525	Unigene0000054;Unigene0000180;Unigene0000282;Unigene0000341;Unigene0000454;Unigene0000494;Unigene0000859;Unigene0000922;Unigene0000997;Unigene0001005;Unigene0001824;Unigene0002943;Unigene0003800;Unigene0006998;Unigene0007955;Unigene0008114;Unigene0008131;Unigene0009306;Unigene0009707;Unigene0010313;Unigene0010384;Unigene0010801;Unigene0011100;Unigene0011139;Unigene0011489;Unigene0011916;Unigene00…
GO:0031326	regulation of cellular biosynthetic process	90	251	0.0100467	0.108213	Unigene0000054;Unigene0000180;Unigene0000282;Unigene0000341;Unigene0000454;Unigene0000494;Unigene0000859;Unigene0000922;Unigene0000997;Unigene0001005;Unigene0001824;Unigene0002943;Unigene0003800;Unigene0006876;Unigene0006998;Unigene0007955;Unigene0008114;Unigene0008131;Unigene0008337;Unigene0009306;Unigene0009707;Unigene0010153;Unigene0010313;Unigene0010384;Unigene0010801;Unigene0011100;Unigene00…
GO:0009893	positive regulation of metabolic process	36	88	0.0107674	0.115097	Unigene0000060;Unigene0000101;Unigene0000284;Unigene0000739;Unigene0003160;Unigene0003292;Unigene0003906;Unigene0004992;Unigene0005532;Unigene0008856;Unigene0009203;Unigene0011689;Unigene0011805;Unigene0013071;Unigene0014429;Unigene0014540;Unigene0014877;Unigene0015655;Unigene0016079;Unigene0017445;Unigene0023650;Unigene0027576;Unigene0033265;Unigene0034082;Unigene0034588;Unigene0035234;Unigene00…
GO:0048827	phyllome development	17	35	0.0111099	0.116986	Unigene0000480;Unigene0002141;Unigene0002207;Unigene0002448;Unigene0005086;Unigene0005500;Unigene0011527;Unigene0019902;Unigene0022435;Unigene0023428;Unigene0024936;Unigene0026572;Unigene0027144;Unigene0029974;Unigene0030343;Unigene0033594;Unigene0037900
GO:0090501	RNA phosphodiester bond hydrolysis	17	35	0.0111099	0.116986	Unigene0001037;Unigene0013636;Unigene0021931;Unigene0023647;Unigene0023649;Unigene0027684;Unigene0029639;Unigene0030818;Unigene0031835;Unigene0034087;Unigene0035749;Unigene0036967;Unigene0037966;Unigene0038897;Unigene0039516;Unigene0040494;Unigene0042065
GO:0043603	cellular amide metabolic process	66	178	0.0114037	0.11919	Unigene0000160;Unigene0001375;Unigene0001655;Unigene0002321;Unigene0002821;Unigene0004077;Unigene0004194;Unigene0006680;Unigene0006876;Unigene0007164;Unigene0009219;Unigene0010153;Unigene0012519;Unigene0012975;Unigene0013191;Unigene0014255;Unigene0015632;Unigene0017737;Unigene0018077;Unigene0018701;Unigene0019540;Unigene0020081;Unigene0020604;Unigene0020958;Unigene0021174;Unigene0022212;Unigene00…
GO:0044802	single-organism membrane organization	31	74	0.0117491	0.119423	Unigene0003800;Unigene0003971;Unigene0004996;Unigene0006237;Unigene0006998;Unigene0010313;Unigene0011805;Unigene0012975;Unigene0013825;Unigene0014466;Unigene0015718;Unigene0020082;Unigene0021242;Unigene0022607;Unigene0023650;Unigene0024224;Unigene0025101;Unigene0026085;Unigene0029259;Unigene0033607;Unigene0034554;Unigene0036106;Unigene0036173;Unigene0036357;Unigene0037689;Unigene0037800;Unigene00…
GO:0015031	protein transport	95	268	0.0117884	0.119423	Unigene0000020;Unigene0000473;Unigene0000685;Unigene0000695;Unigene0000720;Unigene0001294;Unigene0001498;Unigene0001518;Unigene0002157;Unigene0002951;Unigene0003800;Unigene0004005;Unigene0004417;Unigene0004592;Unigene0006237;Unigene0007693;Unigene0008100;Unigene0009203;Unigene0010313;Unigene0010384;Unigene0010725;Unigene0010961;Unigene0011072;Unigene0013071;Unigene0013236;Unigene0015718;Unigene00…
GO:0048608	reproductive structure development	43	109	0.0118294	0.119423	Unigene0000079;Unigene0000265;Unigene0000480;Unigene0000660;Unigene0000999;Unigene0001824;Unigene0002066;Unigene0002141;Unigene0002207;Unigene0002332;Unigene0002448;Unigene0005594;Unigene0008378;Unigene0009203;Unigene0011527;Unigene0012461;Unigene0012869;Unigene0016772;Unigene0017340;Unigene0018339;Unigene0019902;Unigene0022435;Unigene0022473;Unigene0023428;Unigene0023749;Unigene0024341;Unigene00…
GO:0061458	reproductive system development	43	109	0.0118294	0.119423	Unigene0000079;Unigene0000265;Unigene0000480;Unigene0000660;Unigene0000999;Unigene0001824;Unigene0002066;Unigene0002141;Unigene0002207;Unigene0002332;Unigene0002448;Unigene0005594;Unigene0008378;Unigene0009203;Unigene0011527;Unigene0012461;Unigene0012869;Unigene0016772;Unigene0017340;Unigene0018339;Unigene0019902;Unigene0022435;Unigene0022473;Unigene0023428;Unigene0023749;Unigene0024341;Unigene00…
GO:0090407	organophosphate biosynthetic process	60	160	0.0118492	0.119423	Unigene0000054;Unigene0000473;Unigene0000532;Unigene0000786;Unigene0002107;Unigene0002190;Unigene0002207;Unigene0003687;Unigene0004445;Unigene0004751;Unigene0006157;Unigene0006837;Unigene0007482;Unigene0008569;Unigene0009325;Unigene0009999;Unigene0011387;Unigene0011679;Unigene0014153;Unigene0014645;Unigene0014713;Unigene0014786;Unigene0017183;Unigene0017346;Unigene0021304;Unigene0021825;Unigene00…
GO:0008652	cellular amino acid biosynthetic process	56	148	0.0120541	0.120626	Unigene0000341;Unigene0001587;Unigene0003577;Unigene0004021;Unigene0004077;Unigene0005187;Unigene0006358;Unigene0007998;Unigene0008127;Unigene0009495;Unigene0010007;Unigene0010313;Unigene0012428;Unigene0012617;Unigene0012835;Unigene0014690;Unigene0015044;Unigene0016332;Unigene0017613;Unigene0018548;Unigene0020604;Unigene0021522;Unigene0021984;Unigene0022572;Unigene0023676;Unigene0024007;Unigene00…
GO:0009648	photoperiodism	15	30	0.0121538	0.120767	Unigene0003577;Unigene0007400;Unigene0008378;Unigene0008569;Unigene0021833;Unigene0023428;Unigene0023749;Unigene0023904;Unigene0029269;Unigene0031898;Unigene0034255;Unigene0038753;Unigene0038838;Unigene0039831;Unigene0040128
GO:0009409	response to cold	18	38	0.0124182	0.121681	Unigene0000265;Unigene0002207;Unigene0002332;Unigene0005002;Unigene0007400;Unigene0012937;Unigene0014931;Unigene0015770;Unigene0022435;Unigene0023428;Unigene0023647;Unigene0024341;Unigene0024936;Unigene0030343;Unigene0031205;Unigene0034255;Unigene0035412;Unigene0037508
GO:0035194	posttranscriptional gene silencing by RNA	18	38	0.0124182	0.121681	Unigene0011489;Unigene0011527;Unigene0013636;Unigene0013811;Unigene0014931;Unigene0015718;Unigene0022382;Unigene0022473;Unigene0023647;Unigene0024137;Unigene0030772;Unigene0031349;Unigene0035006;Unigene0036774;Unigene0037750;Unigene0039250;Unigene0040086;Unigene0041289
GO:0000338	protein deneddylation	13	25	0.0129261	0.125785	Unigene0007733;Unigene0007955;Unigene0011387;Unigene0014713;Unigene0024936;Unigene0029284;Unigene0029320;Unigene0032808;Unigene0033198;Unigene0037091;Unigene0039142;Unigene0040676;Unigene0040969
GO:0042430	indole-containing compound metabolic process	11	20	0.0130856	0.126464	Unigene0000341;Unigene0007358;Unigene0008854;Unigene0009203;Unigene0010189;Unigene0012835;Unigene0013506;Unigene0017613;Unigene0017966;Unigene0026341;Unigene0030840
GO:0044283	small molecule biosynthetic process	76	210	0.0134226	0.128839	Unigene0000248;Unigene0000252;Unigene0000341;Unigene0001587;Unigene0002190;Unigene0003414;Unigene0003577;Unigene0004021;Unigene0004077;Unigene0004953;Unigene0005187;Unigene0006358;Unigene0007164;Unigene0007998;Unigene0008127;Unigene0009495;Unigene0010007;Unigene0010296;Unigene0010313;Unigene0010384;Unigene0011679;Unigene0012115;Unigene0012428;Unigene0012617;Unigene0012835;Unigene0014690;Unigene00…
GO:1902580	single-organism cellular localization	23	52	0.0136163	0.129815	Unigene0000217;Unigene0000473;Unigene0004417;Unigene0006237;Unigene0007693;Unigene0011072;Unigene0015718;Unigene0016388;Unigene0021242;Unigene0021833;Unigene0022556;Unigene0025923;Unigene0027684;Unigene0030913;Unigene0032177;Unigene0035100;Unigene0035357;Unigene0035419;Unigene0036357;Unigene0038753;Unigene0040436;Unigene0040969;Unigene0042022
GO:0006631	fatty acid metabolic process	51	134	0.0142278	0.134735	Unigene0000248;Unigene0000252;Unigene0000676;Unigene0004237;Unigene0004417;Unigene0004860;Unigene0006746;Unigene0007217;Unigene0007693;Unigene0008337;Unigene0010384;Unigene0010898;Unigene0011072;Unigene0011993;Unigene0012115;Unigene0012479;Unigene0013507;Unigene0014384;Unigene0016388;Unigene0018387;Unigene0020506;Unigene0021367;Unigene0021833;Unigene0022161;Unigene0022497;Unigene0022554;Unigene00…
GO:0009908	flower development	25	58	0.0150388	0.141465	Unigene0000079;Unigene0000265;Unigene0000660;Unigene0000999;Unigene0001824;Unigene0002448;Unigene0005594;Unigene0011527;Unigene0012461;Unigene0012869;Unigene0016772;Unigene0017340;Unigene0018339;Unigene0019902;Unigene0022473;Unigene0024341;Unigene0024936;Unigene0027212;Unigene0031751;Unigene0033190;Unigene0033594;Unigene0033821;Unigene0037508;Unigene0039263;Unigene0041838
GO:0009101	glycoprotein biosynthetic process	17	36	0.0154684	0.144543	Unigene0000422;Unigene0001518;Unigene0001696;Unigene0002951;Unigene0004274;Unigene0006324;Unigene0006941;Unigene0007372;Unigene0015485;Unigene0031868;Unigene0033634;Unigene0035178;Unigene0037160;Unigene0039851;Unigene0040471;Unigene0040535;Unigene0041693
GO:0008610	lipid biosynthetic process	58	156	0.0159471	0.148036	Unigene0000054;Unigene0000248;Unigene0000252;Unigene0000341;Unigene0000786;Unigene0002667;Unigene0004996;Unigene0005848;Unigene0006157;Unigene0006837;Unigene0007164;Unigene0008569;Unigene0009156;Unigene0009348;Unigene0010296;Unigene0010384;Unigene0011417;Unigene0011679;Unigene0012115;Unigene0014786;Unigene0017183;Unigene0017350;Unigene0020277;Unigene0020344;Unigene0021235;Unigene0021708;Unigene00…
GO:0043604	amide biosynthetic process	55	147	0.0162574	0.148335	Unigene0000160;Unigene0001375;Unigene0001655;Unigene0002821;Unigene0004077;Unigene0004194;Unigene0006680;Unigene0006876;Unigene0009219;Unigene0010153;Unigene0012519;Unigene0012975;Unigene0013191;Unigene0014255;Unigene0015632;Unigene0017737;Unigene0018701;Unigene0019540;Unigene0020081;Unigene0020604;Unigene0020958;Unigene0021174;Unigene0022212;Unigene0024575;Unigene0025673;Unigene0026376;Unigene00…
GO:0009112	nucleobase metabolic process	10	18	0.0163567	0.148335	Unigene0002158;Unigene0003687;Unigene0004445;Unigene0014645;Unigene0020808;Unigene0025866;Unigene0034082;Unigene0034134;Unigene0035100;Unigene0039145
GO:0010556	regulation of macromolecule biosynthetic process	87	246	0.0164623	0.148335	Unigene0000054;Unigene0000180;Unigene0000282;Unigene0000341;Unigene0000454;Unigene0000494;Unigene0000859;Unigene0000922;Unigene0000997;Unigene0001005;Unigene0001824;Unigene0002943;Unigene0003800;Unigene0006876;Unigene0006998;Unigene0007955;Unigene0008114;Unigene0008131;Unigene0009306;Unigene0009707;Unigene0010153;Unigene0010313;Unigene0010384;Unigene0010801;Unigene0011100;Unigene0011139;Unigene00…
GO:0030163	protein catabolic process	51	135	0.0165731	0.148335	Unigene0000498;Unigene0000508;Unigene0000720;Unigene0001587;Unigene0003914;Unigene0004107;Unigene0005002;Unigene0005477;Unigene0007372;Unigene0010274;Unigene0010384;Unigene0011387;Unigene0012428;Unigene0012760;Unigene0016450;Unigene0020441;Unigene0021042;Unigene0021851;Unigene0021955;Unigene0022435;Unigene0022664;Unigene0022878;Unigene0023428;Unigene0023477;Unigene0024320;Unigene0024361;Unigene00…
GO:0044257	cellular protein catabolic process	51	135	0.0165731	0.148335	Unigene0000498;Unigene0000508;Unigene0000720;Unigene0001587;Unigene0003914;Unigene0004107;Unigene0005002;Unigene0005477;Unigene0007372;Unigene0010274;Unigene0010384;Unigene0011387;Unigene0012428;Unigene0012760;Unigene0016450;Unigene0020441;Unigene0021042;Unigene0021851;Unigene0021955;Unigene0022435;Unigene0022664;Unigene0022878;Unigene0023428;Unigene0023477;Unigene0024320;Unigene0024361;Unigene00…
GO:2000112	regulation of cellular macromolecule biosynthetic process	86	243	0.0167002	0.148335	Unigene0000054;Unigene0000180;Unigene0000282;Unigene0000341;Unigene0000454;Unigene0000494;Unigene0000859;Unigene0000922;Unigene0000997;Unigene0001005;Unigene0001824;Unigene0002943;Unigene0003800;Unigene0006876;Unigene0006998;Unigene0007955;Unigene0008114;Unigene0008131;Unigene0009306;Unigene0009707;Unigene0010153;Unigene0010313;Unigene0010384;Unigene0010801;Unigene0011100;Unigene0011139;Unigene00…
GO:0034645	cellular macromolecule biosynthetic process	271	841	0.0168023	0.148335	Unigene0000054;Unigene0000079;Unigene0000144;Unigene0000146;Unigene0000150;Unigene0000160;Unigene0000180;Unigene0000282;Unigene0000341;Unigene0000422;Unigene0000454;Unigene0000494;Unigene0000689;Unigene0000690;Unigene0000859;Unigene0000922;Unigene0000997;Unigene0001005;Unigene0001322;Unigene0001375;Unigene0001518;Unigene0001655;Unigene0001696;Unigene0001824;Unigene0001863;Unigene0002066;Unigene00…
GO:0022414	reproductive process	117	341	0.0168968	0.148335	Unigene0000054;Unigene0000079;Unigene0000265;Unigene0000454;Unigene0000473;Unigene0000480;Unigene0000660;Unigene0000677;Unigene0000685;Unigene0000695;Unigene0000922;Unigene0000938;Unigene0000999;Unigene0001518;Unigene0001824;Unigene0002066;Unigene0002141;Unigene0002207;Unigene0002269;Unigene0002332;Unigene0002448;Unigene0002625;Unigene0004077;Unigene0005002;Unigene0005514;Unigene0005594;Unigene00…
GO:0009064	glutamine family amino acid metabolic process	18	39	0.0169338	0.148335	Unigene0004953;Unigene0005976;Unigene0007998;Unigene0010189;Unigene0011540;Unigene0012639;Unigene0013071;Unigene0020446;Unigene0023482;Unigene0028310;Unigene0028514;Unigene0032806;Unigene0033839;Unigene0034015;Unigene0036189;Unigene0037439;Unigene0038006;Unigene0041186
GO:0009889	regulation of biosynthetic process	92	262	0.0170306	0.148335	Unigene0000054;Unigene0000180;Unigene0000282;Unigene0000341;Unigene0000454;Unigene0000494;Unigene0000859;Unigene0000922;Unigene0000997;Unigene0001005;Unigene0001824;Unigene0002943;Unigene0003800;Unigene0006876;Unigene0006998;Unigene0007955;Unigene0008114;Unigene0008131;Unigene0008337;Unigene0009306;Unigene0009707;Unigene0010153;Unigene0010313;Unigene0010384;Unigene0010801;Unigene0011100;Unigene00…
GO:0009746	response to hexose	15	31	0.0173491	0.149265	Unigene0000051;Unigene0002005;Unigene0004237;Unigene0012835;Unigene0013071;Unigene0014429;Unigene0020764;Unigene0025235;Unigene0026071;Unigene0026080;Unigene0032177;Unigene0037441;Unigene0037722;Unigene0038202;Unigene0038914
GO:0034284	response to monosaccharide	15	31	0.0173491	0.149265	Unigene0000051;Unigene0002005;Unigene0004237;Unigene0012835;Unigene0013071;Unigene0014429;Unigene0020764;Unigene0025235;Unigene0026071;Unigene0026080;Unigene0032177;Unigene0037441;Unigene0037722;Unigene0038202;Unigene0038914
GO:0006790	sulfur compound metabolic process	61	166	0.0178395	0.152555	Unigene0000248;Unigene0000341;Unigene0003110;Unigene0003414;Unigene0003577;Unigene0004021;Unigene0004052;Unigene0004237;Unigene0005187;Unigene0006358;Unigene0007164;Unigene0008127;Unigene0009495;Unigene0010007;Unigene0010296;Unigene0010384;Unigene0012617;Unigene0012835;Unigene0014690;Unigene0016332;Unigene0017966;Unigene0018077;Unigene0018548;Unigene0019680;Unigene0020277;Unigene0021249;Unigene00…
GO:0000003	reproduction	118	345	0.0182093	0.15473	Unigene0000054;Unigene0000079;Unigene0000265;Unigene0000454;Unigene0000473;Unigene0000480;Unigene0000660;Unigene0000677;Unigene0000685;Unigene0000695;Unigene0000922;Unigene0000938;Unigene0000999;Unigene0001518;Unigene0001824;Unigene0002066;Unigene0002141;Unigene0002207;Unigene0002269;Unigene0002332;Unigene0002448;Unigene0002625;Unigene0004077;Unigene0005002;Unigene0005514;Unigene0005594;Unigene00…
GO:1901137	carbohydrate derivative biosynthetic process	58	157	0.0183132	0.15473	Unigene0000341;Unigene0000422;Unigene0001518;Unigene0001696;Unigene0002207;Unigene0002951;Unigene0003110;Unigene0003317;Unigene0003687;Unigene0004274;Unigene0004445;Unigene0006324;Unigene0006941;Unigene0007372;Unigene0009348;Unigene0011417;Unigene0011679;Unigene0012835;Unigene0014153;Unigene0014645;Unigene0015485;Unigene0017966;Unigene0021235;Unigene0021249;Unigene0022679;Unigene0024361;Unigene00…
GO:0006396	RNA processing	68	188	0.0188411	0.158242	Unigene0000054;Unigene0000145;Unigene0000545;Unigene0002409;Unigene0007400;Unigene0008127;Unigene0009321;Unigene0009383;Unigene0009615;Unigene0009740;Unigene0010818;Unigene0011201;Unigene0011489;Unigene0011527;Unigene0012094;Unigene0013355;Unigene0013636;Unigene0013811;Unigene0014890;Unigene0015718;Unigene0016952;Unigene0017346;Unigene0017608;Unigene0017826;Unigene0018855;Unigene0020037;Unigene00…
GO:0044085	cellular component biogenesis	98	282	0.0190524	0.15907	Unigene0000054;Unigene0000246;Unigene0000695;Unigene0000857;Unigene0001140;Unigene0001241;Unigene0002131;Unigene0002141;Unigene0002588;Unigene0002708;Unigene0003800;Unigene0004641;Unigene0005002;Unigene0005067;Unigene0005477;Unigene0005514;Unigene0006616;Unigene0006825;Unigene0006998;Unigene0007400;Unigene0007820;Unigene0007995;Unigene0009707;Unigene0010746;Unigene0011541;Unigene0011916;Unigene00…
GO:0009404	toxin metabolic process	16	34	0.0192889	0.160098	Unigene0000054;Unigene0001953;Unigene0005500;Unigene0009203;Unigene0009348;Unigene0018387;Unigene0024320;Unigene0024793;Unigene0026263;Unigene0032780;Unigene0033760;Unigene0033979;Unigene0036660;Unigene0037099;Unigene0039731;Unigene0040717
GO:0033554	cellular response to stress	63	173	0.019926	0.164418	Unigene0000051;Unigene0001718;Unigene0002802;Unigene0003293;Unigene0004223;Unigene0004751;Unigene0007282;Unigene0007450;Unigene0007820;Unigene0007955;Unigene0009203;Unigene0009348;Unigene0011417;Unigene0011916;Unigene0012685;Unigene0012869;Unigene0014074;Unigene0014650;Unigene0014704;Unigene0014826;Unigene0015959;Unigene0017613;Unigene0018532;Unigene0019754;Unigene0020901;Unigene0020948;Unigene00…
GO:0071840	cellular component organization or biogenesis	326	1026	0.020121	0.165062	Unigene0000054;Unigene0000079;Unigene0000217;Unigene0000238;Unigene0000246;Unigene0000253;Unigene0000279;Unigene0000338;Unigene0000341;Unigene0000349;Unigene0000448;Unigene0000454;Unigene0000660;Unigene0000677;Unigene0000685;Unigene0000690;Unigene0000695;Unigene0000720;Unigene0000774;Unigene0000857;Unigene0000922;Unigene0000938;Unigene0001140;Unigene0001241;Unigene0001284;Unigene0001498;Unigene00…
GO:0009100	glycoprotein metabolic process	17	37	0.021045	0.171644	Unigene0000422;Unigene0001518;Unigene0001696;Unigene0002951;Unigene0004274;Unigene0006324;Unigene0006941;Unigene0007372;Unigene0015485;Unigene0031868;Unigene0033634;Unigene0035178;Unigene0037160;Unigene0039851;Unigene0040471;Unigene0040535;Unigene0041693
GO:0043648	dicarboxylic acid metabolic process	14	29	0.0217296	0.176209	Unigene0000468;Unigene0004077;Unigene0005976;Unigene0006392;Unigene0008337;Unigene0012639;Unigene0017663;Unigene0019048;Unigene0022878;Unigene0023676;Unigene0028310;Unigene0029275;Unigene0029493;Unigene0036696
GO:0019219	regulation of nucleobase-containing compound metabolic process	81	230	0.0223497	0.180203	Unigene0000054;Unigene0000079;Unigene0000180;Unigene0000282;Unigene0000341;Unigene0000454;Unigene0000494;Unigene0000859;Unigene0000922;Unigene0000997;Unigene0001005;Unigene0001824;Unigene0002141;Unigene0002943;Unigene0003800;Unigene0006998;Unigene0007955;Unigene0008114;Unigene0008131;Unigene0009306;Unigene0009707;Unigene0010313;Unigene0010384;Unigene0010801;Unigene0010818;Unigene0011100;Unigene00…
GO:0048437	floral organ development	18	40	0.0226238	0.181376	Unigene0000079;Unigene0000265;Unigene0000660;Unigene0002448;Unigene0011527;Unigene0012461;Unigene0012869;Unigene0016772;Unigene0017340;Unigene0018339;Unigene0019902;Unigene0022473;Unigene0024341;Unigene0024936;Unigene0033594;Unigene0037508;Unigene0039263;Unigene0041838
GO:0005996	monosaccharide metabolic process	35	89	0.0227892	0.18167	Unigene0000720;Unigene0001587;Unigene0002951;Unigene0004274;Unigene0005743;Unigene0005783;Unigene0007216;Unigene0008948;Unigene0011387;Unigene0012428;Unigene0013312;Unigene0015408;Unigene0020357;Unigene0020520;Unigene0021851;Unigene0022572;Unigene0022840;Unigene0022878;Unigene0029259;Unigene0029409;Unigene0032791;Unigene0033391;Unigene0033518;Unigene0034248;Unigene0034588;Unigene0034849;Unigene00…
GO:0019748	secondary metabolic process	36	92	0.0229197	0.181684	Unigene0000054;Unigene0000060;Unigene0000341;Unigene0000814;Unigene0001953;Unigene0003110;Unigene0005500;Unigene0009203;Unigene0009348;Unigene0010384;Unigene0012835;Unigene0017966;Unigene0018387;Unigene0021249;Unigene0024320;Unigene0024793;Unigene0025101;Unigene0026256;Unigene0026263;Unigene0032780;Unigene0033760;Unigene0033979;Unigene0034311;Unigene0034588;Unigene0035417;Unigene0036660;Unigene00…
GO:0009266	response to temperature stimulus	24	57	0.0232116	0.182966	Unigene0000265;Unigene0002207;Unigene0002332;Unigene0005002;Unigene0007400;Unigene0007751;Unigene0012937;Unigene0014931;Unigene0015770;Unigene0022435;Unigene0023428;Unigene0023647;Unigene0023749;Unigene0024341;Unigene0024936;Unigene0030343;Unigene0031205;Unigene0033979;Unigene0034255;Unigene0035412;Unigene0037141;Unigene0037508;Unigene0039010;Unigene0039274
GO:0000038	very long-chain fatty acid metabolic process	3	3	0.0243782	0.182966	Unigene0022497;Unigene0035412;Unigene0039477
GO:0000460	maturation of 5.8S rRNA	3	3	0.0243782	0.182966	Unigene0026253;Unigene0034230;Unigene0037966
GO:0006266	DNA ligation	3	3	0.0243782	0.182966	Unigene0018532;Unigene0020901;Unigene0035904
GO:0006352	DNA-templated transcription, initiation	3	3	0.0243782	0.182966	Unigene0015655;Unigene0019540;Unigene0033039
GO:0006476	protein deacetylation	3	3	0.0243782	0.182966	Unigene0004300;Unigene0039109;Unigene0039686
GO:0007088	regulation of mitotic nuclear division	3	3	0.0243782	0.182966	Unigene0020441;Unigene0032769;Unigene0034666
GO:0008614	pyridoxine metabolic process	3	3	0.0243782	0.182966	Unigene0004953;Unigene0021825;Unigene0035417
GO:0016575	histone deacetylation	3	3	0.0243782	0.182966	Unigene0004300;Unigene0039109;Unigene0039686
GO:0042816	vitamin B6 metabolic process	3	3	0.0243782	0.182966	Unigene0004953;Unigene0021825;Unigene0035417
GO:0051302	regulation of cell division	5	7	0.0248055	0.184941	Unigene0020441;Unigene0022473;Unigene0023388;Unigene0032769;Unigene0034666
GO:0006508	proteolysis	65	181	0.0249417	0.184941	Unigene0000498;Unigene0000508;Unigene0000720;Unigene0001587;Unigene0003160;Unigene0003914;Unigene0004107;Unigene0005002;Unigene0005477;Unigene0007372;Unigene0007681;Unigene0007733;Unigene0007955;Unigene0010274;Unigene0011011;Unigene0011387;Unigene0012428;Unigene0012760;Unigene0014713;Unigene0020170;Unigene0020441;Unigene0021042;Unigene0021851;Unigene0021955;Unigene0022435;Unigene0022664;Unigene00…
GO:0006974	cellular response to DNA damage stimulus	27	66	0.0250346	0.184941	Unigene0001718;Unigene0007450;Unigene0007955;Unigene0011916;Unigene0012685;Unigene0012869;Unigene0014074;Unigene0014704;Unigene0020901;Unigene0020948;Unigene0021883;Unigene0022473;Unigene0023247;Unigene0023497;Unigene0023579;Unigene0026572;Unigene0027780;Unigene0028263;Unigene0030998;Unigene0034534;Unigene0035514;Unigene0037103;Unigene0037439;Unigene0038753;Unigene0039004;Unigene0039274;Unigene00…
GO:0009642	response to light intensity	20	46	0.0252904	0.185488	Unigene0002502;Unigene0002802;Unigene0003293;Unigene0004594;Unigene0004751;Unigene0007751;Unigene0008100;Unigene0010384;Unigene0014650;Unigene0015959;Unigene0026256;Unigene0029807;Unigene0033633;Unigene0033715;Unigene0036392;Unigene0036651;Unigene0036981;Unigene0037931;Unigene0038112;Unigene0039274
GO:0006402	mRNA catabolic process	8	14	0.0256448	0.185488	Unigene0003577;Unigene0007400;Unigene0011851;Unigene0015000;Unigene0023131;Unigene0032988;Unigene0033276;Unigene0036173
GO:0009850	auxin metabolic process	8	14	0.0256448	0.185488	Unigene0000341;Unigene0007358;Unigene0010189;Unigene0012835;Unigene0013506;Unigene0017613;Unigene0017966;Unigene0036328
GO:0080134	regulation of response to stress	8	14	0.0256448	0.185488	Unigene0008112;Unigene0009203;Unigene0020037;Unigene0025775;Unigene0031751;Unigene0033821;Unigene0035164;Unigene0041211
GO:0022607	cellular component assembly	71	200	0.025849	0.185488	Unigene0000695;Unigene0000857;Unigene0001241;Unigene0002131;Unigene0002141;Unigene0002588;Unigene0002708;Unigene0003800;Unigene0005002;Unigene0005477;Unigene0005514;Unigene0006616;Unigene0006998;Unigene0007820;Unigene0010746;Unigene0011541;Unigene0011916;Unigene0012117;Unigene0012617;Unigene0012760;Unigene0013825;Unigene0013839;Unigene0014407;Unigene0017368;Unigene0017685;Unigene0018548;Unigene00…
GO:0051704	multi-organism process	62	172	0.0258973	0.185488	Unigene0000051;Unigene0000720;Unigene0001696;Unigene0002332;Unigene0003577;Unigene0004223;Unigene0005477;Unigene0006324;Unigene0006746;Unigene0008112;Unigene0008614;Unigene0009203;Unigene0010384;Unigene0010442;Unigene0010725;Unigene0011489;Unigene0014931;Unigene0015492;Unigene0017340;Unigene0017354;Unigene0017613;Unigene0017966;Unigene0018115;Unigene0018339;Unigene0018646;Unigene0019902;Unigene00…
GO:0006081	cellular aldehyde metabolic process	4	5	0.0271352	0.186725	Unigene0012287;Unigene0021825;Unigene0035417;Unigene0038400
GO:0006570	tyrosine metabolic process	4	5	0.0271352	0.186725	Unigene0020193;Unigene0027694;Unigene0032177;Unigene0036766
GO:0006743	ubiquinone metabolic process	4	5	0.0271352	0.186725	Unigene0005326;Unigene0006097;Unigene0026395;Unigene0028105
GO:0022406	membrane docking	4	5	0.0271352	0.186725	Unigene0007216;Unigene0023470;Unigene0024503;Unigene0040140
GO:0048278	vesicle docking	4	5	0.0271352	0.186725	Unigene0007216;Unigene0023470;Unigene0024503;Unigene0040140
GO:0048584	positive regulation of response to stimulus	4	5	0.0271352	0.186725	Unigene0009203;Unigene0020037;Unigene0025775;Unigene0035164
GO:0051783	regulation of nuclear division	4	5	0.0271352	0.186725	Unigene0020441;Unigene0022473;Unigene0032769;Unigene0034666
GO:0098732	macromolecule deacylation	4	5	0.0271352	0.186725	Unigene0004300;Unigene0006324;Unigene0039109;Unigene0039686
GO:0010608	posttranscriptional regulation of gene expression	38	99	0.027261	0.186725	Unigene0000079;Unigene0006876;Unigene0010153;Unigene0010296;Unigene0010384;Unigene0011489;Unigene0011527;Unigene0012975;Unigene0013636;Unigene0013811;Unigene0014931;Unigene0015718;Unigene0017737;Unigene0018701;Unigene0022382;Unigene0022473;Unigene0023647;Unigene0024137;Unigene0024575;Unigene0025428;Unigene0025683;Unigene0029320;Unigene0030772;Unigene0031349;Unigene0031799;Unigene0033124;Unigene00…
GO:0009668	plastid membrane organization	24	58	0.0289806	0.197355	Unigene0003800;Unigene0003971;Unigene0004996;Unigene0006998;Unigene0010313;Unigene0011805;Unigene0012975;Unigene0013825;Unigene0014466;Unigene0020082;Unigene0022607;Unigene0023650;Unigene0024224;Unigene0025101;Unigene0026085;Unigene0029259;Unigene0033607;Unigene0034554;Unigene0036106;Unigene0037689;Unigene0037800;Unigene0038963;Unigene0038969;Unigene0039084
GO:0016053	organic acid biosynthetic process	62	173	0.0292326	0.197355	Unigene0000252;Unigene0000341;Unigene0001587;Unigene0003414;Unigene0003577;Unigene0004021;Unigene0004077;Unigene0005187;Unigene0006358;Unigene0007998;Unigene0008127;Unigene0009495;Unigene0010007;Unigene0010313;Unigene0010384;Unigene0012115;Unigene0012428;Unigene0012617;Unigene0012835;Unigene0014690;Unigene0015044;Unigene0016332;Unigene0017613;Unigene0018548;Unigene0020604;Unigene0021522;Unigene00…
GO:0046394	carboxylic acid biosynthetic process	62	173	0.0292326	0.197355	Unigene0000252;Unigene0000341;Unigene0001587;Unigene0003414;Unigene0003577;Unigene0004021;Unigene0004077;Unigene0005187;Unigene0006358;Unigene0007998;Unigene0008127;Unigene0009495;Unigene0010007;Unigene0010313;Unigene0010384;Unigene0012115;Unigene0012428;Unigene0012617;Unigene0012835;Unigene0014690;Unigene0015044;Unigene0016332;Unigene0017613;Unigene0018548;Unigene0020604;Unigene0021522;Unigene00…
GO:0090305	nucleic acid phosphodiester bond hydrolysis	18	41	0.0296576	0.199271	Unigene0001037;Unigene0013636;Unigene0021931;Unigene0023647;Unigene0023649;Unigene0027684;Unigene0029639;Unigene0030818;Unigene0031835;Unigene0034087;Unigene0035749;Unigene0036967;Unigene0037966;Unigene0038897;Unigene0039516;Unigene0040494;Unigene0041237;Unigene0042065
GO:0043170	macromolecule metabolic process	1068	3552	0.0301893	0.201882	Unigene0000048;Unigene0000051;Unigene0000054;Unigene0000060;Unigene0000071;Unigene0000075;Unigene0000079;Unigene0000085;Unigene0000099;Unigene0000101;Unigene0000138;Unigene0000144;Unigene0000145;Unigene0000146;Unigene0000148;Unigene0000150;Unigene0000160;Unigene0000163;Unigene0000168;Unigene0000180;Unigene0000208;Unigene0000220;Unigene0000229;Unigene0000230;Unigene0000236;Unigene0000262;Unigene00…
GO:0080090	regulation of primary metabolic process	122	364	0.0309581	0.206047	Unigene0000051;Unigene0000054;Unigene0000079;Unigene0000101;Unigene0000180;Unigene0000282;Unigene0000341;Unigene0000454;Unigene0000494;Unigene0000739;Unigene0000859;Unigene0000922;Unigene0000997;Unigene0001005;Unigene0001824;Unigene0002141;Unigene0002943;Unigene0003800;Unigene0005532;Unigene0006876;Unigene0006998;Unigene0007955;Unigene0008114;Unigene0008131;Unigene0008856;Unigene0009203;Unigene00…
GO:0033036	macromolecule localization	138	416	0.0318024	0.21	Unigene0000020;Unigene0000167;Unigene0000473;Unigene0000685;Unigene0000695;Unigene0000720;Unigene0000999;Unigene0001294;Unigene0001498;Unigene0001518;Unigene0002157;Unigene0002215;Unigene0002802;Unigene0002879;Unigene0002951;Unigene0003434;Unigene0003800;Unigene0004005;Unigene0004321;Unigene0004417;Unigene0004592;Unigene0005594;Unigene0006237;Unigene0007216;Unigene0007693;Unigene0008100;Unigene00…
GO:0006544	glycine metabolic process	7	12	0.0321552	0.21	Unigene0000868;Unigene0010384;Unigene0016472;Unigene0018696;Unigene0033633;Unigene0033872;Unigene0039874
GO:0009683	indoleacetic acid metabolic process	7	12	0.0321552	0.21	Unigene0000341;Unigene0007358;Unigene0010189;Unigene0012835;Unigene0013506;Unigene0017613;Unigene0017966
GO:0009057	macromolecule catabolic process	71	202	0.0322648	0.21	Unigene0000349;Unigene0000498;Unigene0000508;Unigene0000720;Unigene0001587;Unigene0003577;Unigene0003590;Unigene0003914;Unigene0004107;Unigene0005002;Unigene0005477;Unigene0005718;Unigene0006333;Unigene0006618;Unigene0007372;Unigene0007400;Unigene0010274;Unigene0010384;Unigene0011387;Unigene0011851;Unigene0012428;Unigene0012760;Unigene0015000;Unigene0016450;Unigene0020441;Unigene0021042;Unigene00…
GO:0006518	peptide metabolic process	54	149	0.0322962	0.21	Unigene0000160;Unigene0001375;Unigene0001655;Unigene0002821;Unigene0004194;Unigene0006680;Unigene0006876;Unigene0009219;Unigene0010153;Unigene0012519;Unigene0012975;Unigene0013191;Unigene0014255;Unigene0015632;Unigene0017737;Unigene0018077;Unigene0018701;Unigene0019540;Unigene0020081;Unigene0020958;Unigene0021174;Unigene0022212;Unigene0024575;Unigene0025315;Unigene0025673;Unigene0026376;Unigene00…
GO:0009411	response to UV	15	33	0.0325897	0.210936	Unigene0000265;Unigene0002190;Unigene0009203;Unigene0010746;Unigene0019902;Unigene0024341;Unigene0024747;Unigene0033594;Unigene0033910;Unigene0035164;Unigene0035484;Unigene0035857;Unigene0037508;Unigene0038344;Unigene0039476
GO:0043043	peptide biosynthetic process	51	140	0.0334137	0.21404	Unigene0000160;Unigene0001375;Unigene0001655;Unigene0002821;Unigene0004194;Unigene0006680;Unigene0006876;Unigene0009219;Unigene0010153;Unigene0012519;Unigene0012975;Unigene0013191;Unigene0014255;Unigene0015632;Unigene0017737;Unigene0018701;Unigene0019540;Unigene0020081;Unigene0020958;Unigene0021174;Unigene0022212;Unigene0024575;Unigene0025673;Unigene0026376;Unigene0026599;Unigene0027830;Unigene00…
GO:0044702	single organism reproductive process	51	140	0.0334137	0.21404	Unigene0000079;Unigene0000265;Unigene0000454;Unigene0000480;Unigene0000660;Unigene0000677;Unigene0000695;Unigene0000999;Unigene0001824;Unigene0002141;Unigene0002207;Unigene0002332;Unigene0002448;Unigene0005002;Unigene0005514;Unigene0005594;Unigene0008378;Unigene0009203;Unigene0011527;Unigene0011916;Unigene0012461;Unigene0012869;Unigene0013350;Unigene0016772;Unigene0017340;Unigene0018339;Unigene00…
GO:0032502	developmental process	234	731	0.0336856	0.21404	Unigene0000051;Unigene0000054;Unigene0000079;Unigene0000230;Unigene0000240;Unigene0000248;Unigene0000253;Unigene0000265;Unigene0000338;Unigene0000473;Unigene0000480;Unigene0000660;Unigene0000685;Unigene0000690;Unigene0000863;Unigene0000922;Unigene0000938;Unigene0000999;Unigene0001344;Unigene0001455;Unigene0001518;Unigene0001824;Unigene0001952;Unigene0001953;Unigene0002066;Unigene0002141;Unigene00…
GO:0009126	purine nucleoside monophosphate metabolic process	12	25	0.0342828	0.21404	Unigene0002207;Unigene0003687;Unigene0014153;Unigene0022679;Unigene0024361;Unigene0027249;Unigene0034015;Unigene0034626;Unigene0035073;Unigene0038309;Unigene0039874;Unigene0041484
GO:0009127	purine nucleoside monophosphate biosynthetic process	12	25	0.0342828	0.21404	Unigene0002207;Unigene0003687;Unigene0014153;Unigene0022679;Unigene0024361;Unigene0027249;Unigene0034015;Unigene0034626;Unigene0035073;Unigene0038309;Unigene0039874;Unigene0041484
GO:0009167	purine ribonucleoside monophosphate metabolic process	12	25	0.0342828	0.21404	Unigene0002207;Unigene0003687;Unigene0014153;Unigene0022679;Unigene0024361;Unigene0027249;Unigene0034015;Unigene0034626;Unigene0035073;Unigene0038309;Unigene0039874;Unigene0041484
GO:0009168	purine ribonucleoside monophosphate biosynthetic process	12	25	0.0342828	0.21404	Unigene0002207;Unigene0003687;Unigene0014153;Unigene0022679;Unigene0024361;Unigene0027249;Unigene0034015;Unigene0034626;Unigene0035073;Unigene0038309;Unigene0039874;Unigene0041484
GO:0018958	phenol-containing compound metabolic process	12	25	0.0342828	0.21404	Unigene0009203;Unigene0010384;Unigene0015492;Unigene0017613;Unigene0018646;Unigene0020193;Unigene0025775;Unigene0032177;Unigene0033633;Unigene0038309;Unigene0038945;Unigene0041211
GO:0051603	proteolysis involved in cellular protein catabolic process	46	125	0.0351645	0.218578	Unigene0000498;Unigene0000508;Unigene0000720;Unigene0001587;Unigene0003914;Unigene0004107;Unigene0005002;Unigene0005477;Unigene0007372;Unigene0010274;Unigene0011387;Unigene0012428;Unigene0012760;Unigene0020441;Unigene0021042;Unigene0021851;Unigene0021955;Unigene0022435;Unigene0022664;Unigene0022878;Unigene0023428;Unigene0023477;Unigene0024320;Unigene0024361;Unigene0028093;Unigene0032769;Unigene00…
GO:1901293	nucleoside phosphate biosynthetic process	40	107	0.0369078	0.228408	Unigene0000473;Unigene0000532;Unigene0002107;Unigene0002207;Unigene0003687;Unigene0004445;Unigene0004751;Unigene0007482;Unigene0009325;Unigene0009999;Unigene0011387;Unigene0014153;Unigene0014645;Unigene0014713;Unigene0017346;Unigene0021304;Unigene0022679;Unigene0024361;Unigene0025866;Unigene0027249;Unigene0028105;Unigene0028310;Unigene0029333;Unigene0032706;Unigene0033470;Unigene0033872;Unigene00…
GO:0006412	translation	50	138	0.0384543	0.236939	Unigene0000160;Unigene0001375;Unigene0001655;Unigene0002821;Unigene0004194;Unigene0006680;Unigene0006876;Unigene0009219;Unigene0010153;Unigene0012519;Unigene0012975;Unigene0013191;Unigene0014255;Unigene0015632;Unigene0017737;Unigene0018701;Unigene0019540;Unigene0020081;Unigene0020958;Unigene0021174;Unigene0022212;Unigene0024575;Unigene0025673;Unigene0026376;Unigene0026599;Unigene0027830;Unigene00…
GO:0006586	indolalkylamine metabolic process	6	10	0.0403234	0.247375	Unigene0007358;Unigene0008854;Unigene0010189;Unigene0013506;Unigene0017613;Unigene0026341
GO:0006089	lactate metabolic process	14	31	0.040616	0.248092	Unigene0001784;Unigene0006727;Unigene0008569;Unigene0011417;Unigene0012117;Unigene0012963;Unigene0015518;Unigene0018696;Unigene0024747;Unigene0029223;Unigene0031319;Unigene0033760;Unigene0033909;Unigene0041485
GO:0070647	protein modification by small protein conjugation or removal	62	176	0.0413005	0.251185	Unigene0000060;Unigene0000208;Unigene0000498;Unigene0000508;Unigene0002190;Unigene0002207;Unigene0002522;Unigene0003730;Unigene0004264;Unigene0005002;Unigene0005594;Unigene0007090;Unigene0007733;Unigene0007955;Unigene0011349;Unigene0011387;Unigene0011916;Unigene0014713;Unigene0014942;Unigene0015316;Unigene0015770;Unigene0017877;Unigene0018473;Unigene0019710;Unigene0020441;Unigene0022213;Unigene00…
GO:0006486	protein glycosylation	15	34	0.0430904	0.259447	Unigene0000422;Unigene0001518;Unigene0001696;Unigene0002951;Unigene0004274;Unigene0006324;Unigene0006941;Unigene0007372;Unigene0015485;Unigene0033634;Unigene0035178;Unigene0037160;Unigene0040471;Unigene0040535;Unigene0041693
GO:0043413	macromolecule glycosylation	15	34	0.0430904	0.259447	Unigene0000422;Unigene0001518;Unigene0001696;Unigene0002951;Unigene0004274;Unigene0006324;Unigene0006941;Unigene0007372;Unigene0015485;Unigene0033634;Unigene0035178;Unigene0037160;Unigene0040471;Unigene0040535;Unigene0041693
GO:0034655	nucleobase-containing compound catabolic process	11	23	0.0432106	0.259447	Unigene0003577;Unigene0007400;Unigene0011851;Unigene0015000;Unigene0023131;Unigene0027684;Unigene0031626;Unigene0032988;Unigene0033276;Unigene0036173;Unigene0038897
GO:0072527	pyrimidine-containing compound metabolic process	24	60	0.0436944	0.261241	Unigene0000473;Unigene0002107;Unigene0002158;Unigene0004052;Unigene0004445;Unigene0004751;Unigene0007482;Unigene0009999;Unigene0011387;Unigene0014645;Unigene0014713;Unigene0017346;Unigene0021304;Unigene0025866;Unigene0028310;Unigene0029333;Unigene0030832;Unigene0032706;Unigene0034117;Unigene0035100;Unigene0035279;Unigene0038006;Unigene0038167;Unigene0039142
GO:0000096	sulfur amino acid metabolic process	35	93	0.044194	0.263113	Unigene0000341;Unigene0003577;Unigene0004021;Unigene0005187;Unigene0006358;Unigene0008127;Unigene0009495;Unigene0010007;Unigene0012617;Unigene0012835;Unigene0014690;Unigene0016332;Unigene0018548;Unigene0019680;Unigene0021522;Unigene0021984;Unigene0030225;Unigene0030772;Unigene0033633;Unigene0034255;Unigene0035509;Unigene0035939;Unigene0035971;Unigene0036221;Unigene0036901;Unigene0037175;Unigene00…
GO:0051171	regulation of nitrogen compound metabolic process	96	285	0.045265	0.268357	Unigene0000054;Unigene0000079;Unigene0000180;Unigene0000282;Unigene0000341;Unigene0000454;Unigene0000494;Unigene0000859;Unigene0000922;Unigene0000997;Unigene0001005;Unigene0001824;Unigene0002141;Unigene0002943;Unigene0003800;Unigene0006876;Unigene0006998;Unigene0007955;Unigene0008114;Unigene0008131;Unigene0009306;Unigene0009707;Unigene0010153;Unigene0010313;Unigene0010384;Unigene0010801;Unigene00…
GO:0048731	system development	80	234	0.0459922	0.271527	Unigene0000051;Unigene0000054;Unigene0000079;Unigene0000265;Unigene0000480;Unigene0000660;Unigene0000690;Unigene0000922;Unigene0000938;Unigene0000999;Unigene0001455;Unigene0001824;Unigene0001952;Unigene0002066;Unigene0002141;Unigene0002207;Unigene0002332;Unigene0002448;Unigene0003800;Unigene0005002;Unigene0005086;Unigene0005500;Unigene0005594;Unigene0007317;Unigene0007820;Unigene0008378;Unigene00…
GO:0044093	positive regulation of molecular function	17	40	0.0469334	0.275254	Unigene0000060;Unigene0000101;Unigene0000739;Unigene0005532;Unigene0008856;Unigene0009203;Unigene0011689;Unigene0014877;Unigene0016079;Unigene0033265;Unigene0035234;Unigene0036766;Unigene0037777;Unigene0038017;Unigene0039742;Unigene0041247;Unigene0041670
GO:0009605	response to external stimulus	84	247	0.0470136	0.275254	Unigene0000051;Unigene0000265;Unigene0000695;Unigene0000720;Unigene0000992;Unigene0001696;Unigene0003577;Unigene0004223;Unigene0005477;Unigene0006324;Unigene0006746;Unigene0007282;Unigene0007384;Unigene0007733;Unigene0007955;Unigene0008112;Unigene0008378;Unigene0008614;Unigene0009203;Unigene0009348;Unigene0009795;Unigene0010384;Unigene0010725;Unigene0011417;Unigene0011489;Unigene0014931;Unigene00…
GO:0009123	nucleoside monophosphate metabolic process	18	43	0.0483953	0.281011	Unigene0002207;Unigene0003687;Unigene0004445;Unigene0014153;Unigene0014645;Unigene0022679;Unigene0024361;Unigene0025866;Unigene0027249;Unigene0033872;Unigene0034015;Unigene0034626;Unigene0035073;Unigene0038006;Unigene0038309;Unigene0039597;Unigene0039874;Unigene0041484
GO:0009124	nucleoside monophosphate biosynthetic process	18	43	0.0483953	0.281011	Unigene0002207;Unigene0003687;Unigene0004445;Unigene0014153;Unigene0014645;Unigene0022679;Unigene0024361;Unigene0025866;Unigene0027249;Unigene0033872;Unigene0034015;Unigene0034626;Unigene0035073;Unigene0038006;Unigene0038309;Unigene0039597;Unigene0039874;Unigene0041484
GO:0070085	glycosylation	19	46	0.0496029	0.286021	Unigene0000422;Unigene0001518;Unigene0001696;Unigene0002951;Unigene0004274;Unigene0006324;Unigene0006825;Unigene0006941;Unigene0007372;Unigene0015485;Unigene0026442;Unigene0033634;Unigene0035178;Unigene0037160;Unigene0040127;Unigene0040280;Unigene0040471;Unigene0040535;Unigene0041693
GO:0044707	single-multicellular organism process	177	550	0.0499058	0.286021	Unigene0000051;Unigene0000054;Unigene0000079;Unigene0000230;Unigene0000248;Unigene0000265;Unigene0000480;Unigene0000660;Unigene0000690;Unigene0000922;Unigene0000938;Unigene0000999;Unigene0001455;Unigene0001824;Unigene0001952;Unigene0002066;Unigene0002141;Unigene0002207;Unigene0002269;Unigene0002332;Unigene0002448;Unigene0002625;Unigene0002943;Unigene0003383;Unigene0003800;Unigene0004293;Unigene00…
GO:0019538	protein metabolic process	553	1809	0.0501	0.286021	Unigene0000048;Unigene0000051;Unigene0000054;Unigene0000060;Unigene0000071;Unigene0000075;Unigene0000099;Unigene0000101;Unigene0000138;Unigene0000146;Unigene0000148;Unigene0000160;Unigene0000168;Unigene0000208;Unigene0000229;Unigene0000236;Unigene0000338;Unigene0000340;Unigene0000421;Unigene0000422;Unigene0000442;Unigene0000474;Unigene0000479;Unigene0000498;Unigene0000508;Unigene0000660;Unigene00…
GO:0006206	pyrimidine nucleobase metabolic process	5	8	0.0504803	0.286021	Unigene0002158;Unigene0004445;Unigene0014645;Unigene0025866;Unigene0035100
GO:0009165	nucleotide biosynthetic process	37	100	0.0505032	0.286021	Unigene0000473;Unigene0000532;Unigene0002107;Unigene0002207;Unigene0003687;Unigene0004445;Unigene0004751;Unigene0007482;Unigene0009999;Unigene0011387;Unigene0014153;Unigene0014645;Unigene0014713;Unigene0017346;Unigene0021304;Unigene0022679;Unigene0024361;Unigene0025866;Unigene0027249;Unigene0028105;Unigene0028310;Unigene0029333;Unigene0032706;Unigene0033470;Unigene0034015;Unigene0034117;Unigene00…
GO:0016144	S-glycoside biosynthetic process	13	29	0.050677	0.286021	Unigene0000341;Unigene0003110;Unigene0012835;Unigene0017966;Unigene0021249;Unigene0025101;Unigene0026256;Unigene0034588;Unigene0035417;Unigene0037722;Unigene0038309;Unigene0039928;Unigene0040608
GO:0019758	glycosinolate biosynthetic process	13	29	0.050677	0.286021	Unigene0000341;Unigene0003110;Unigene0012835;Unigene0017966;Unigene0021249;Unigene0025101;Unigene0026256;Unigene0034588;Unigene0035417;Unigene0037722;Unigene0038309;Unigene0039928;Unigene0040608
GO:0061024	membrane organization	36	97	0.0509406	0.286363	Unigene0001498;Unigene0003800;Unigene0003971;Unigene0004005;Unigene0004996;Unigene0006237;Unigene0006998;Unigene0010313;Unigene0011805;Unigene0012975;Unigene0013825;Unigene0014058;Unigene0014466;Unigene0015718;Unigene0020082;Unigene0021242;Unigene0022607;Unigene0023650;Unigene0024224;Unigene0025101;Unigene0026085;Unigene0029259;Unigene0033607;Unigene0034554;Unigene0034745;Unigene0036106;Unigene00…
GO:0016043	cellular component organization	301	962	0.0520879	0.287382	Unigene0000054;Unigene0000079;Unigene0000217;Unigene0000238;Unigene0000246;Unigene0000253;Unigene0000279;Unigene0000338;Unigene0000341;Unigene0000349;Unigene0000454;Unigene0000660;Unigene0000677;Unigene0000685;Unigene0000690;Unigene0000695;Unigene0000720;Unigene0000774;Unigene0000857;Unigene0000922;Unigene0000938;Unigene0001241;Unigene0001284;Unigene0001498;Unigene0001518;Unigene0001587;Unigene00…
GO:0000723	telomere maintenance	7	13	0.0525475	0.287382	Unigene0000454;Unigene0000677;Unigene0024127;Unigene0024936;Unigene0032074;Unigene0037091;Unigene0037701
GO:0006760	folic acid-containing compound metabolic process	7	13	0.0525475	0.287382	Unigene0002321;Unigene0004077;Unigene0020604;Unigene0033872;Unigene0035107;Unigene0039419;Unigene0041399
GO:0019321	pentose metabolic process	7	13	0.0525475	0.287382	Unigene0015408;Unigene0022840;Unigene0029259;Unigene0033518;Unigene0034849;Unigene0036861;Unigene0040355
GO:0032200	telomere organization	7	13	0.0525475	0.287382	Unigene0000454;Unigene0000677;Unigene0024127;Unigene0024936;Unigene0032074;Unigene0037091;Unigene0037701
GO:0042558	pteridine-containing compound metabolic process	7	13	0.0525475	0.287382	Unigene0002321;Unigene0004077;Unigene0020604;Unigene0033872;Unigene0035107;Unigene0039419;Unigene0041399
GO:0060249	anatomical structure homeostasis	7	13	0.0525475	0.287382	Unigene0000454;Unigene0000677;Unigene0024127;Unigene0024936;Unigene0032074;Unigene0037091;Unigene0037701
GO:0099402	plant organ development	43	119	0.05413	0.294394	Unigene0000051;Unigene0000054;Unigene0000079;Unigene0000265;Unigene0000480;Unigene0000660;Unigene0000922;Unigene0001455;Unigene0002141;Unigene0002207;Unigene0002448;Unigene0005086;Unigene0005500;Unigene0011527;Unigene0011916;Unigene0012461;Unigene0012869;Unigene0016772;Unigene0017340;Unigene0017529;Unigene0018339;Unigene0019902;Unigene0020446;Unigene0021825;Unigene0022435;Unigene0022473;Unigene00…
GO:0006259	DNA metabolic process	104	313	0.0542469	0.294394	Unigene0000079;Unigene0000220;Unigene0000279;Unigene0000341;Unigene0000429;Unigene0000454;Unigene0000677;Unigene0000689;Unigene0001718;Unigene0002141;Unigene0002332;Unigene0002409;Unigene0002783;Unigene0003393;Unigene0003415;Unigene0003487;Unigene0003683;Unigene0003735;Unigene0003756;Unigene0004685;Unigene0005002;Unigene0007450;Unigene0007820;Unigene0007955;Unigene0008199;Unigene0009226;Unigene00…
GO:0031323	regulation of cellular metabolic process	124	378	0.0547411	0.295938	Unigene0000054;Unigene0000079;Unigene0000101;Unigene0000180;Unigene0000282;Unigene0000341;Unigene0000454;Unigene0000494;Unigene0000739;Unigene0000859;Unigene0000922;Unigene0000997;Unigene0001005;Unigene0001824;Unigene0002141;Unigene0002943;Unigene0003800;Unigene0005532;Unigene0006876;Unigene0006998;Unigene0007955;Unigene0008114;Unigene0008131;Unigene0008337;Unigene0008856;Unigene0009203;Unigene00…
GO:0009156	ribonucleoside monophosphate biosynthetic process	16	38	0.057653	0.308138	Unigene0002207;Unigene0003687;Unigene0004445;Unigene0014153;Unigene0014645;Unigene0022679;Unigene0024361;Unigene0025866;Unigene0027249;Unigene0034015;Unigene0034626;Unigene0035073;Unigene0038006;Unigene0038309;Unigene0039874;Unigene0041484
GO:0009161	ribonucleoside monophosphate metabolic process	16	38	0.057653	0.308138	Unigene0002207;Unigene0003687;Unigene0004445;Unigene0014153;Unigene0014645;Unigene0022679;Unigene0024361;Unigene0025866;Unigene0027249;Unigene0034015;Unigene0034626;Unigene0035073;Unigene0038006;Unigene0038309;Unigene0039874;Unigene0041484
GO:0072594	establishment of protein localization to organelle	16	38	0.057653	0.308138	Unigene0000473;Unigene0004417;Unigene0007693;Unigene0011072;Unigene0016388;Unigene0021833;Unigene0022556;Unigene0025923;Unigene0027684;Unigene0030913;Unigene0032177;Unigene0035100;Unigene0035357;Unigene0035419;Unigene0038753;Unigene0040969
GO:0043207	response to external biotic stimulus	54	154	0.0583859	0.309709	Unigene0000051;Unigene0000720;Unigene0001696;Unigene0003577;Unigene0004223;Unigene0005477;Unigene0006324;Unigene0006746;Unigene0008112;Unigene0008614;Unigene0009203;Unigene0010384;Unigene0010725;Unigene0011489;Unigene0014931;Unigene0015492;Unigene0017340;Unigene0017354;Unigene0017613;Unigene0017966;Unigene0018115;Unigene0018339;Unigene0018646;Unigene0019902;Unigene0020037;Unigene0020446;Unigene00…
GO:0051707	response to other organism	54	154	0.0583859	0.309709	Unigene0000051;Unigene0000720;Unigene0001696;Unigene0003577;Unigene0004223;Unigene0005477;Unigene0006324;Unigene0006746;Unigene0008112;Unigene0008614;Unigene0009203;Unigene0010384;Unigene0010725;Unigene0011489;Unigene0014931;Unigene0015492;Unigene0017340;Unigene0017354;Unigene0017613;Unigene0017966;Unigene0018115;Unigene0018339;Unigene0018646;Unigene0019902;Unigene0020037;Unigene0020446;Unigene00…
GO:1901135	carbohydrate derivative metabolic process	71	208	0.059163	0.310176	Unigene0000138;Unigene0000341;Unigene0000422;Unigene0001518;Unigene0001696;Unigene0002207;Unigene0002944;Unigene0002951;Unigene0003110;Unigene0003317;Unigene0003687;Unigene0004274;Unigene0004445;Unigene0006324;Unigene0006333;Unigene0006746;Unigene0006941;Unigene0007372;Unigene0009348;Unigene0010384;Unigene0011417;Unigene0011679;Unigene0012835;Unigene0014153;Unigene0014645;Unigene0015485;Unigene00…
GO:0019941	modification-dependent protein catabolic process	35	95	0.0593267	0.310176	Unigene0000498;Unigene0000508;Unigene0003914;Unigene0004107;Unigene0005002;Unigene0005477;Unigene0007372;Unigene0010274;Unigene0012760;Unigene0020441;Unigene0021042;Unigene0021955;Unigene0022435;Unigene0022664;Unigene0023428;Unigene0023477;Unigene0024320;Unigene0024361;Unigene0028093;Unigene0032769;Unigene0033570;Unigene0033726;Unigene0034100;Unigene0035251;Unigene0035509;Unigene0036357;Unigene00…
GO:0043632	modification-dependent macromolecule catabolic process	35	95	0.0593267	0.310176	Unigene0000498;Unigene0000508;Unigene0003914;Unigene0004107;Unigene0005002;Unigene0005477;Unigene0007372;Unigene0010274;Unigene0012760;Unigene0020441;Unigene0021042;Unigene0021955;Unigene0022435;Unigene0022664;Unigene0023428;Unigene0023477;Unigene0024320;Unigene0024361;Unigene0028093;Unigene0032769;Unigene0033570;Unigene0033726;Unigene0034100;Unigene0035251;Unigene0035509;Unigene0036357;Unigene00…
GO:0040029	regulation of gene expression, epigenetic	32	86	0.0609682	0.310176	Unigene0000079;Unigene0000480;Unigene0002141;Unigene0002332;Unigene0010296;Unigene0011489;Unigene0011527;Unigene0011916;Unigene0012431;Unigene0013636;Unigene0013811;Unigene0014931;Unigene0015718;Unigene0016046;Unigene0022382;Unigene0022473;Unigene0022799;Unigene0023647;Unigene0024137;Unigene0025428;Unigene0030425;Unigene0030772;Unigene0031349;Unigene0035006;Unigene0036774;Unigene0037091;Unigene00…
GO:0006979	response to oxidative stress	19	47	0.0613277	0.310176	Unigene0002502;Unigene0002802;Unigene0003293;Unigene0004751;Unigene0007751;Unigene0008100;Unigene0012617;Unigene0014650;Unigene0015959;Unigene0023513;Unigene0023749;Unigene0024793;Unigene0033715;Unigene0036392;Unigene0036651;Unigene0036981;Unigene0037931;Unigene0038112;Unigene0039274
GO:0044550	secondary metabolite biosynthetic process	19	47	0.0613277	0.310176	Unigene0000060;Unigene0000341;Unigene0003110;Unigene0009203;Unigene0012835;Unigene0017966;Unigene0021249;Unigene0025101;Unigene0026256;Unigene0034311;Unigene0034588;Unigene0035417;Unigene0037722;Unigene0038309;Unigene0038707;Unigene0039928;Unigene0040608;Unigene0040783;Unigene0041182
GO:0006525	arginine metabolic process	8	16	0.0619912	0.310176	Unigene0011540;Unigene0020446;Unigene0023482;Unigene0028514;Unigene0032806;Unigene0033839;Unigene0036189;Unigene0038006
GO:0009414	response to water deprivation	8	16	0.0619912	0.310176	Unigene0001783;Unigene0009348;Unigene0011417;Unigene0017346;Unigene0021043;Unigene0024793;Unigene0034431;Unigene0037557
GO:0009415	response to water	8	16	0.0619912	0.310176	Unigene0001783;Unigene0009348;Unigene0011417;Unigene0017346;Unigene0021043;Unigene0024793;Unigene0034431;Unigene0037557
GO:0009887	organ morphogenesis	20	50	0.062049	0.310176	Unigene0000079;Unigene0000690;Unigene0000999;Unigene0001952;Unigene0002141;Unigene0002332;Unigene0003800;Unigene0005002;Unigene0011916;Unigene0012461;Unigene0012869;Unigene0013825;Unigene0016772;Unigene0019902;Unigene0022473;Unigene0024936;Unigene0033633;Unigene0038963;Unigene0039874;Unigene0041838
GO:0072528	pyrimidine-containing compound biosynthetic process	20	50	0.062049	0.310176	Unigene0000473;Unigene0002107;Unigene0004052;Unigene0004445;Unigene0004751;Unigene0007482;Unigene0009999;Unigene0011387;Unigene0014645;Unigene0014713;Unigene0017346;Unigene0021304;Unigene0025866;Unigene0028310;Unigene0029333;Unigene0030832;Unigene0032706;Unigene0034117;Unigene0038006;Unigene0039142
GO:0006418	tRNA aminoacylation for protein translation	21	53	0.0625756	0.310176	Unigene0006680;Unigene0006876;Unigene0009219;Unigene0012519;Unigene0012975;Unigene0013191;Unigene0014255;Unigene0020958;Unigene0025673;Unigene0034319;Unigene0034954;Unigene0038477;Unigene0038513;Unigene0038913;Unigene0038969;Unigene0039084;Unigene0039716;Unigene0040424;Unigene0041005;Unigene0041058;Unigene0041980
GO:0006568	tryptophan metabolic process	4	6	0.0627756	0.310176	Unigene0007358;Unigene0010189;Unigene0013506;Unigene0017613
GO:0006997	nucleus organization	4	6	0.0627756	0.310176	Unigene0006047;Unigene0025285;Unigene0028243;Unigene0036981
GO:0009396	folic acid-containing compound biosynthetic process	4	6	0.0627756	0.310176	Unigene0004077;Unigene0020604;Unigene0033872;Unigene0035107
GO:0042398	cellular modified amino acid biosynthetic process	4	6	0.0627756	0.310176	Unigene0004077;Unigene0020604;Unigene0033872;Unigene0035107
GO:0042559	pteridine-containing compound biosynthetic process	4	6	0.0627756	0.310176	Unigene0004077;Unigene0020604;Unigene0033872;Unigene0035107
GO:0044403	symbiosis, encompassing mutualism through parasitism	4	6	0.0627756	0.310176	Unigene0010442;Unigene0023891;Unigene0025683;Unigene0033718
GO:0044419	interspecies interaction between organisms	4	6	0.0627756	0.310176	Unigene0010442;Unigene0023891;Unigene0025683;Unigene0033718
GO:0032501	multicellular organismal process	177	554	0.0630649	0.310176	Unigene0000051;Unigene0000054;Unigene0000079;Unigene0000230;Unigene0000248;Unigene0000265;Unigene0000480;Unigene0000660;Unigene0000690;Unigene0000922;Unigene0000938;Unigene0000999;Unigene0001455;Unigene0001824;Unigene0001952;Unigene0002066;Unigene0002141;Unigene0002207;Unigene0002269;Unigene0002332;Unigene0002448;Unigene0002625;Unigene0002943;Unigene0003383;Unigene0003800;Unigene0004293;Unigene00…
GO:1901659	glycosyl compound biosynthetic process	24	62	0.063234	0.310176	Unigene0000341;Unigene0003110;Unigene0004445;Unigene0012835;Unigene0014153;Unigene0014645;Unigene0017966;Unigene0021249;Unigene0024361;Unigene0025101;Unigene0025866;Unigene0026256;Unigene0027249;Unigene0028105;Unigene0034588;Unigene0034626;Unigene0035417;Unigene0037722;Unigene0038006;Unigene0038309;Unigene0039874;Unigene0039928;Unigene0040608;Unigene0041484
GO:0009072	aromatic amino acid family metabolic process	12	27	0.0633102	0.310176	Unigene0007358;Unigene0010189;Unigene0013506;Unigene0017613;Unigene0018387;Unigene0020193;Unigene0020604;Unigene0023550;Unigene0024341;Unigene0027694;Unigene0032177;Unigene0036766
GO:0044767	single-organism developmental process	193	607	0.0635861	0.31045	Unigene0000051;Unigene0000054;Unigene0000079;Unigene0000230;Unigene0000240;Unigene0000248;Unigene0000253;Unigene0000265;Unigene0000480;Unigene0000660;Unigene0000690;Unigene0000863;Unigene0000922;Unigene0000938;Unigene0000999;Unigene0001344;Unigene0001455;Unigene0001824;Unigene0001952;Unigene0001953;Unigene0002066;Unigene0002141;Unigene0002207;Unigene0002269;Unigene0002332;Unigene0002448;Unigene00…
GO:0032446	protein modification by small protein conjugation	53	152	0.0661786	0.321993	Unigene0000060;Unigene0000208;Unigene0000498;Unigene0000508;Unigene0002190;Unigene0002207;Unigene0002522;Unigene0003730;Unigene0004264;Unigene0005002;Unigene0005594;Unigene0007090;Unigene0007955;Unigene0011349;Unigene0011916;Unigene0014942;Unigene0015316;Unigene0015770;Unigene0017877;Unigene0018473;Unigene0019710;Unigene0020441;Unigene0022213;Unigene0022435;Unigene0023428;Unigene0023477;Unigene00…
GO:0048869	cellular developmental process	57	165	0.0686413	0.330506	Unigene0000054;Unigene0000240;Unigene0000253;Unigene0000863;Unigene0000922;Unigene0001344;Unigene0001455;Unigene0001953;Unigene0002141;Unigene0002207;Unigene0002269;Unigene0002332;Unigene0003800;Unigene0005002;Unigene0005514;Unigene0005532;Unigene0007216;Unigene0008948;Unigene0010192;Unigene0010746;Unigene0011916;Unigene0012835;Unigene0013350;Unigene0013825;Unigene0017529;Unigene0017966;Unigene00…
GO:0016143	S-glycoside metabolic process	14	33	0.0688651	0.330506	Unigene0000341;Unigene0003110;Unigene0010384;Unigene0012835;Unigene0017966;Unigene0021249;Unigene0025101;Unigene0026256;Unigene0034588;Unigene0035417;Unigene0037722;Unigene0038309;Unigene0039928;Unigene0040608
GO:0019757	glycosinolate metabolic process	14	33	0.0688651	0.330506	Unigene0000341;Unigene0003110;Unigene0010384;Unigene0012835;Unigene0017966;Unigene0021249;Unigene0025101;Unigene0026256;Unigene0034588;Unigene0035417;Unigene0037722;Unigene0038309;Unigene0039928;Unigene0040608
GO:0070646	protein modification by small protein removal	14	33	0.0688651	0.330506	Unigene0007733;Unigene0007955;Unigene0011387;Unigene0014713;Unigene0024936;Unigene0029284;Unigene0029320;Unigene0032808;Unigene0033198;Unigene0033449;Unigene0037091;Unigene0039142;Unigene0040676;Unigene0040969
GO:0044272	sulfur compound biosynthetic process	42	118	0.0704217	0.333399	Unigene0000341;Unigene0003110;Unigene0003577;Unigene0004021;Unigene0005187;Unigene0006358;Unigene0008127;Unigene0009495;Unigene0010007;Unigene0012835;Unigene0014690;Unigene0016332;Unigene0017966;Unigene0018548;Unigene0021249;Unigene0021522;Unigene0021984;Unigene0025101;Unigene0026256;Unigene0030225;Unigene0030772;Unigene0033633;Unigene0034255;Unigene0034588;Unigene0035417;Unigene0035971;Unigene00…
GO:0043085	positive regulation of catalytic activity	16	39	0.0722973	0.333399	Unigene0000060;Unigene0000101;Unigene0000739;Unigene0005532;Unigene0008856;Unigene0009203;Unigene0011689;Unigene0014877;Unigene0016079;Unigene0033265;Unigene0035234;Unigene0036766;Unigene0037777;Unigene0038017;Unigene0041247;Unigene0041670
GO:0009607	response to biotic stimulus	54	156	0.0723144	0.333399	Unigene0000051;Unigene0000720;Unigene0001696;Unigene0003577;Unigene0004223;Unigene0005477;Unigene0006324;Unigene0006746;Unigene0008112;Unigene0008614;Unigene0009203;Unigene0010384;Unigene0010725;Unigene0011489;Unigene0014931;Unigene0015492;Unigene0017340;Unigene0017354;Unigene0017613;Unigene0017966;Unigene0018115;Unigene0018339;Unigene0018646;Unigene0019902;Unigene0020037;Unigene0020446;Unigene00…
GO:0019318	hexose metabolic process	28	75	0.073184	0.333399	Unigene0000720;Unigene0001587;Unigene0002951;Unigene0004274;Unigene0005743;Unigene0007216;Unigene0008948;Unigene0011387;Unigene0012428;Unigene0013312;Unigene0020357;Unigene0020520;Unigene0021851;Unigene0022572;Unigene0022878;Unigene0029409;Unigene0032791;Unigene0033391;Unigene0034248;Unigene0034588;Unigene0035501;Unigene0035857;Unigene0036861;Unigene0036940;Unigene0037533;Unigene0038006;Unigene00…
GO:1901657	glycosyl compound metabolic process	27	72	0.0737422	0.333399	Unigene0000341;Unigene0003110;Unigene0004445;Unigene0010384;Unigene0012835;Unigene0014153;Unigene0014645;Unigene0017966;Unigene0021249;Unigene0024361;Unigene0025101;Unigene0025866;Unigene0026256;Unigene0027249;Unigene0027551;Unigene0028105;Unigene0028614;Unigene0034588;Unigene0034626;Unigene0035417;Unigene0037722;Unigene0038006;Unigene0038309;Unigene0039874;Unigene0039928;Unigene0040608;Unigene00…
GO:0000302	response to reactive oxygen species	18	45	0.0742604	0.333399	Unigene0002502;Unigene0002802;Unigene0003293;Unigene0004751;Unigene0007751;Unigene0008100;Unigene0014650;Unigene0015959;Unigene0023513;Unigene0023749;Unigene0024793;Unigene0033715;Unigene0036392;Unigene0036651;Unigene0036981;Unigene0037931;Unigene0038112;Unigene0039274
GO:0008380	RNA splicing	18	45	0.0742604	0.333399	Unigene0007400;Unigene0008127;Unigene0009740;Unigene0010818;Unigene0012094;Unigene0016952;Unigene0017346;Unigene0017608;Unigene0021522;Unigene0021984;Unigene0023647;Unigene0026644;Unigene0030772;Unigene0032415;Unigene0034255;Unigene0035971;Unigene0038391;Unigene0039274
GO:0006498	N-terminal protein lipidation	10	22	0.0748822	0.333399	Unigene0000146;Unigene0001696;Unigene0011011;Unigene0021042;Unigene0023247;Unigene0025923;Unigene0034007;Unigene0035909;Unigene0036901;Unigene0038753
GO:0031365	N-terminal protein amino acid modification	10	22	0.0748822	0.333399	Unigene0000146;Unigene0001696;Unigene0011011;Unigene0021042;Unigene0023247;Unigene0025923;Unigene0034007;Unigene0035909;Unigene0036901;Unigene0038753
GO:0051606	detection of stimulus	10	22	0.0748822	0.333399	Unigene0002211;Unigene0007733;Unigene0008378;Unigene0023749;Unigene0032808;Unigene0033198;Unigene0033594;Unigene0033821;Unigene0034588;Unigene0040676
GO:0006955	immune response	22	57	0.0753638	0.333399	Unigene0004223;Unigene0008614;Unigene0009203;Unigene0010384;Unigene0011489;Unigene0011527;Unigene0015492;Unigene0017354;Unigene0017613;Unigene0020037;Unigene0021648;Unigene0021984;Unigene0022382;Unigene0023647;Unigene0025775;Unigene0027576;Unigene0030772;Unigene0033633;Unigene0035164;Unigene0037750;Unigene0038309;Unigene0041211
GO:0045087	innate immune response	22	57	0.0753638	0.333399	Unigene0004223;Unigene0008614;Unigene0009203;Unigene0010384;Unigene0011489;Unigene0011527;Unigene0015492;Unigene0017354;Unigene0017613;Unigene0020037;Unigene0021648;Unigene0021984;Unigene0022382;Unigene0023647;Unigene0025775;Unigene0027576;Unigene0030772;Unigene0033633;Unigene0035164;Unigene0037750;Unigene0038309;Unigene0041211
GO:0000956	nuclear-transcribed mRNA catabolic process	3	4	0.0763203	0.333399	Unigene0015000;Unigene0023131;Unigene0033276
GO:0002218	activation of innate immune response	3	4	0.0763203	0.333399	Unigene0020037;Unigene0025775;Unigene0035164
GO:0002253	activation of immune response	3	4	0.0763203	0.333399	Unigene0020037;Unigene0025775;Unigene0035164
GO:0002684	positive regulation of immune system process	3	4	0.0763203	0.333399	Unigene0020037;Unigene0025775;Unigene0035164
GO:0006020	inositol metabolic process	3	4	0.0763203	0.333399	Unigene0006727;Unigene0024538;Unigene0033665
GO:0007067	mitotic nuclear division	3	4	0.0763203	0.333399	Unigene0020441;Unigene0032769;Unigene0034666
GO:0009625	response to insect	3	4	0.0763203	0.333399	Unigene0022161;Unigene0030998;Unigene0032005
GO:0010393	galacturonan metabolic process	3	4	0.0763203	0.333399	Unigene0000349;Unigene0001344;Unigene0024227
GO:0015977	carbon fixation	3	4	0.0763203	0.333399	Unigene0034376;Unigene0037800;Unigene0041116
GO:0031349	positive regulation of defense response	3	4	0.0763203	0.333399	Unigene0020037;Unigene0025775;Unigene0035164
GO:0043401	steroid hormone mediated signaling pathway	3	4	0.0763203	0.333399	Unigene0005500;Unigene0033594;Unigene0036766
GO:0045088	regulation of innate immune response	3	4	0.0763203	0.333399	Unigene0020037;Unigene0025775;Unigene0035164
GO:0045089	positive regulation of innate immune response	3	4	0.0763203	0.333399	Unigene0020037;Unigene0025775;Unigene0035164
GO:0048545	response to steroid hormone	3	4	0.0763203	0.333399	Unigene0005500;Unigene0033594;Unigene0036766
GO:0050776	regulation of immune response	3	4	0.0763203	0.333399	Unigene0020037;Unigene0025775;Unigene0035164
GO:0050778	positive regulation of immune response	3	4	0.0763203	0.333399	Unigene0020037;Unigene0025775;Unigene0035164
GO:0071383	cellular response to steroid hormone stimulus	3	4	0.0763203	0.333399	Unigene0005500;Unigene0033594;Unigene0036766
GO:0016458	gene silencing	44	125	0.0767842	0.33439	Unigene0000079;Unigene0000262;Unigene0000480;Unigene0000695;Unigene0000999;Unigene0002332;Unigene0006324;Unigene0010296;Unigene0010725;Unigene0011489;Unigene0011527;Unigene0011916;Unigene0012431;Unigene0013636;Unigene0013811;Unigene0014931;Unigene0015718;Unigene0016046;Unigene0016772;Unigene0022382;Unigene0022473;Unigene0023647;Unigene0024137;Unigene0024936;Unigene0025428;Unigene0026572;Unigene00…
GO:0006397	mRNA processing	7	14	0.0794502	0.33522	Unigene0002409;Unigene0009615;Unigene0010818;Unigene0023127;Unigene0026644;Unigene0033968;Unigene0034255
GO:0044764	multi-organism cellular process	7	14	0.0794502	0.33522	Unigene0002332;Unigene0010442;Unigene0023497;Unigene0023891;Unigene0025487;Unigene0025683;Unigene0039109
GO:0048856	anatomical structure development	150	469	0.0795345	0.33522	Unigene0000051;Unigene0000054;Unigene0000079;Unigene0000240;Unigene0000253;Unigene0000265;Unigene0000338;Unigene0000480;Unigene0000660;Unigene0000685;Unigene0000690;Unigene0000863;Unigene0000922;Unigene0000938;Unigene0000999;Unigene0001344;Unigene0001455;Unigene0001824;Unigene0001952;Unigene0001953;Unigene0002066;Unigene0002141;Unigene0002207;Unigene0002269;Unigene0002332;Unigene0002448;Unigene00…
GO:0019751	polyol metabolic process	12	28	0.0825175	0.33522	Unigene0002190;Unigene0006727;Unigene0006746;Unigene0011679;Unigene0018115;Unigene0019712;Unigene0024538;Unigene0024623;Unigene0028456;Unigene0033665;Unigene0036766;Unigene0040519
GO:0000018	regulation of DNA recombination	2	2	0.0841019	0.33522	Unigene0022473;Unigene0040885
GO:0000098	sulfur amino acid catabolic process	2	2	0.0841019	0.33522	Unigene0019680;Unigene0035509
GO:0000724	double-strand break repair via homologous recombination	2	2	0.0841019	0.33522	Unigene0021883;Unigene0023497
GO:0000726	non-recombinational repair	2	2	0.0841019	0.33522	Unigene0023579;Unigene0035514
GO:0000959	mitochondrial RNA metabolic process	2	2	0.0841019	0.33522	Unigene0013191;Unigene0027684
GO:0006023	aminoglycan biosynthetic process	2	2	0.0841019	0.33522	Unigene0031868;Unigene0039851
GO:0006302	double-strand break repair	2	2	0.0841019	0.33522	Unigene0021883;Unigene0023497
GO:0006338	chromatin remodeling	2	2	0.0841019	0.33522	Unigene0000690;Unigene0033085
GO:0006536	glutamate metabolic process	2	2	0.0841019	0.33522	Unigene0005976;Unigene0012639
GO:0007051	spindle organization	2	2	0.0841019	0.33522	Unigene0023388;Unigene0039742
GO:0009110	vitamin biosynthetic process	2	2	0.0841019	0.33522	Unigene0004953;Unigene0036371
GO:0009900	dehiscence	2	2	0.0841019	0.33522	Unigene0001824;Unigene0005514
GO:0015846	polyamine transport	2	2	0.0841019	0.33522	Unigene0035301;Unigene0038573
GO:0019336	phenol-containing compound catabolic process	2	2	0.0841019	0.33522	Unigene0020193;Unigene0032177
GO:0030166	proteoglycan biosynthetic process	2	2	0.0841019	0.33522	Unigene0031868;Unigene0039851
GO:0042364	water-soluble vitamin biosynthetic process	2	2	0.0841019	0.33522	Unigene0004953;Unigene0036371
GO:0043255	regulation of carbohydrate biosynthetic process	2	2	0.0841019	0.33522	Unigene0036106;Unigene0036766
GO:0044273	sulfur compound catabolic process	2	2	0.0841019	0.33522	Unigene0019680;Unigene0035509
GO:0048024	regulation of mRNA splicing, via spliceosome	2	2	0.0841019	0.33522	Unigene0010818;Unigene0026644
GO:0048438	floral whorl development	2	2	0.0841019	0.33522	Unigene0011527;Unigene0027212
GO:0048571	long-day photoperiodism	2	2	0.0841019	0.33522	Unigene0023749;Unigene0034255
GO:0050684	regulation of mRNA processing	2	2	0.0841019	0.33522	Unigene0010818;Unigene0026644
GO:0051260	protein homooligomerization	2	2	0.0841019	0.33522	Unigene0019680;Unigene0022878
GO:1901068	guanosine-containing compound metabolic process	2	2	0.0841019	0.33522	Unigene0027551;Unigene0028614
GO:1901616	organic hydroxy compound catabolic process	2	2	0.0841019	0.33522	Unigene0020193;Unigene0032177
GO:1903311	regulation of mRNA metabolic process	2	2	0.0841019	0.33522	Unigene0010818;Unigene0026644
GO:0006310	DNA recombination	13	31	0.0850319	0.337972	Unigene0000079;Unigene0005002;Unigene0007955;Unigene0011916;Unigene0014713;Unigene0021883;Unigene0022473;Unigene0023497;Unigene0024936;Unigene0026572;Unigene0039274;Unigene0040885;Unigene0040969
GO:0002376	immune system process	27	73	0.0858134	0.339867	Unigene0004223;Unigene0008112;Unigene0008614;Unigene0009203;Unigene0010384;Unigene0011489;Unigene0011527;Unigene0013636;Unigene0015492;Unigene0015718;Unigene0017354;Unigene0017613;Unigene0018646;Unigene0020037;Unigene0021648;Unigene0021984;Unigene0022382;Unigene0023647;Unigene0025775;Unigene0027576;Unigene0030772;Unigene0033633;Unigene0035164;Unigene0035909;Unigene0037750;Unigene0038309;Unigene00…
GO:0010208	pollen wall assembly	5	9	0.0869538	0.339867	Unigene0005514;Unigene0010746;Unigene0024579;Unigene0033594;Unigene0034399
GO:0030198	extracellular matrix organization	5	9	0.0869538	0.339867	Unigene0005514;Unigene0010746;Unigene0024579;Unigene0033594;Unigene0034399
GO:0043062	extracellular structure organization	5	9	0.0869538	0.339867	Unigene0005514;Unigene0010746;Unigene0024579;Unigene0033594;Unigene0034399
GO:0072525	pyridine-containing compound biosynthetic process	5	9	0.0869538	0.339867	Unigene0000532;Unigene0021825;Unigene0033470;Unigene0037260;Unigene0038363
GO:0085029	extracellular matrix assembly	5	9	0.0869538	0.339867	Unigene0005514;Unigene0010746;Unigene0024579;Unigene0033594;Unigene0034399
GO:0009617	response to bacterium	24	64	0.0881699	0.342878	Unigene0000051;Unigene0003577;Unigene0006324;Unigene0006746;Unigene0009203;Unigene0010384;Unigene0014931;Unigene0017340;Unigene0017613;Unigene0017966;Unigene0018339;Unigene0018646;Unigene0020037;Unigene0020446;Unigene0023513;Unigene0025710;Unigene0025775;Unigene0033030;Unigene0033594;Unigene0034588;Unigene0037800;Unigene0037801;Unigene0040058;Unigene0041211
GO:0009581	detection of external stimulus	8	17	0.0882102	0.342878	Unigene0007733;Unigene0008378;Unigene0023749;Unigene0032808;Unigene0033198;Unigene0033821;Unigene0034588;Unigene0040676
GO:0043038	amino acid activation	22	58	0.08935	0.345405	Unigene0006680;Unigene0006876;Unigene0009219;Unigene0012519;Unigene0012975;Unigene0013191;Unigene0014255;Unigene0020958;Unigene0025673;Unigene0033001;Unigene0034319;Unigene0034954;Unigene0038477;Unigene0038513;Unigene0038913;Unigene0038969;Unigene0039084;Unigene0039716;Unigene0040424;Unigene0041005;Unigene0041058;Unigene0041980
GO:0043039	tRNA aminoacylation	22	58	0.08935	0.345405	Unigene0006680;Unigene0006876;Unigene0009219;Unigene0012519;Unigene0012975;Unigene0013191;Unigene0014255;Unigene0020958;Unigene0025673;Unigene0033001;Unigene0034319;Unigene0034954;Unigene0038477;Unigene0038513;Unigene0038913;Unigene0038969;Unigene0039084;Unigene0039716;Unigene0040424;Unigene0041005;Unigene0041058;Unigene0041980
GO:0006972	hyperosmotic response	9	20	0.094593	0.36368	Unigene0000474;Unigene0009348;Unigene0021825;Unigene0033086;Unigene0033979;Unigene0035909;Unigene0036392;Unigene0038707;Unigene0040519
GO:0009694	jasmonic acid metabolic process	9	20	0.094593	0.36368	Unigene0000720;Unigene0010384;Unigene0018115;Unigene0032990;Unigene0033086;Unigene0033176;Unigene0033633;Unigene0037689;Unigene0039874
GO:0065003	macromolecular complex assembly	60	178	0.0953987	0.365569	Unigene0001241;Unigene0002131;Unigene0002141;Unigene0002588;Unigene0002708;Unigene0003800;Unigene0005002;Unigene0005477;Unigene0006616;Unigene0006998;Unigene0007820;Unigene0011916;Unigene0012760;Unigene0013825;Unigene0013839;Unigene0014407;Unigene0017368;Unigene0017685;Unigene0018548;Unigene0019192;Unigene0019680;Unigene0021042;Unigene0022382;Unigene0022473;Unigene0022664;Unigene0022878;Unigene00…
GO:0070271	protein complex biogenesis	55	162	0.0956024	0.365569	Unigene0000246;Unigene0001241;Unigene0002131;Unigene0002588;Unigene0002708;Unigene0003800;Unigene0005002;Unigene0005477;Unigene0006616;Unigene0006998;Unigene0007400;Unigene0011916;Unigene0012760;Unigene0013825;Unigene0013839;Unigene0014407;Unigene0017368;Unigene0017685;Unigene0018548;Unigene0019192;Unigene0019680;Unigene0021042;Unigene0022382;Unigene0022664;Unigene0022878;Unigene0024320;Unigene00…
GO:0010468	regulation of gene expression	227	729	0.0987956	0.376437	Unigene0000051;Unigene0000054;Unigene0000079;Unigene0000144;Unigene0000163;Unigene0000180;Unigene0000262;Unigene0000282;Unigene0000341;Unigene0000454;Unigene0000480;Unigene0000494;Unigene0000689;Unigene0000690;Unigene0000695;Unigene0000774;Unigene0000859;Unigene0000922;Unigene0000997;Unigene0000999;Unigene0001005;Unigene0001824;Unigene0002066;Unigene0002141;Unigene0002269;Unigene0002272;Unigene00…
GO:0009696	salicylic acid metabolic process	10	23	0.0992449	0.376437	Unigene0009203;Unigene0010384;Unigene0015492;Unigene0017613;Unigene0018646;Unigene0025775;Unigene0033633;Unigene0038309;Unigene0038945;Unigene0041211
GO:0042537	benzene-containing compound metabolic process	10	23	0.0992449	0.376437	Unigene0009203;Unigene0010384;Unigene0015492;Unigene0017613;Unigene0018646;Unigene0025775;Unigene0033633;Unigene0038309;Unigene0038945;Unigene0041211
GO:0016482	cytoplasmic transport	35	99	0.100087	0.378612	Unigene0000473;Unigene0000474;Unigene0000999;Unigene0002977;Unigene0004417;Unigene0007693;Unigene0011072;Unigene0016388;Unigene0019847;Unigene0020251;Unigene0021468;Unigene0021715;Unigene0021833;Unigene0022556;Unigene0023470;Unigene0024936;Unigene0025923;Unigene0027684;Unigene0029284;Unigene0030913;Unigene0032177;Unigene0032780;Unigene0033281;Unigene0033634;Unigene0034242;Unigene0034500;Unigene00…
GO:0006952	defense response	41	118	0.101154	0.381626	Unigene0003386;Unigene0004223;Unigene0006324;Unigene0008112;Unigene0008131;Unigene0008614;Unigene0009203;Unigene0009371;Unigene0010384;Unigene0010725;Unigene0010796;Unigene0011489;Unigene0011527;Unigene0014931;Unigene0015492;Unigene0017354;Unigene0017613;Unigene0018646;Unigene0020037;Unigene0021648;Unigene0021984;Unigene0022382;Unigene0023647;Unigene0025775;Unigene0027576;Unigene0030772;Unigene00…
GO:0006066	alcohol metabolic process	25	68	0.10161	0.382325	Unigene0000248;Unigene0002190;Unigene0006727;Unigene0006746;Unigene0007164;Unigene0010296;Unigene0011679;Unigene0017984;Unigene0018115;Unigene0019712;Unigene0020277;Unigene0021708;Unigene0024538;Unigene0024623;Unigene0026853;Unigene0028369;Unigene0028456;Unigene0033030;Unigene0033591;Unigene0033665;Unigene0036438;Unigene0036766;Unigene0037319;Unigene0039664;Unigene0040519
GO:0010212	response to ionizing radiation	6	12	0.102541	0.383016	Unigene0000220;Unigene0020901;Unigene0024936;Unigene0032074;Unigene0037091;Unigene0037701
GO:0006766	vitamin metabolic process	11	26	0.102608	0.383016	Unigene0003076;Unigene0004052;Unigene0004594;Unigene0004953;Unigene0007164;Unigene0016582;Unigene0021825;Unigene0035279;Unigene0035417;Unigene0036371;Unigene0038167
GO:0006767	water-soluble vitamin metabolic process	11	26	0.102608	0.383016	Unigene0003076;Unigene0004052;Unigene0004594;Unigene0004953;Unigene0007164;Unigene0016582;Unigene0021825;Unigene0035279;Unigene0035417;Unigene0036371;Unigene0038167
GO:0044267	cellular protein metabolic process	474	1563	0.10433	0.384793	Unigene0000048;Unigene0000051;Unigene0000054;Unigene0000060;Unigene0000099;Unigene0000101;Unigene0000138;Unigene0000146;Unigene0000160;Unigene0000168;Unigene0000208;Unigene0000229;Unigene0000236;Unigene0000338;Unigene0000340;Unigene0000422;Unigene0000442;Unigene0000474;Unigene0000479;Unigene0000498;Unigene0000508;Unigene0000660;Unigene0000695;Unigene0000720;Unigene0000739;Unigene0000774;Unigene00…
GO:0019222	regulation of metabolic process	294	955	0.104668	0.384793	Unigene0000051;Unigene0000054;Unigene0000060;Unigene0000079;Unigene0000101;Unigene0000109;Unigene0000144;Unigene0000163;Unigene0000180;Unigene0000262;Unigene0000282;Unigene0000284;Unigene0000341;Unigene0000454;Unigene0000480;Unigene0000494;Unigene0000578;Unigene0000689;Unigene0000690;Unigene0000695;Unigene0000739;Unigene0000774;Unigene0000859;Unigene0000922;Unigene0000997;Unigene0000999;Unigene00…
GO:0006576	cellular biogenic amine metabolic process	12	29	0.104993	0.384793	Unigene0006075;Unigene0006876;Unigene0007358;Unigene0008854;Unigene0010189;Unigene0013506;Unigene0017613;Unigene0023482;Unigene0026341;Unigene0033030;Unigene0033591;Unigene0041182
GO:0006625	protein targeting to peroxisome	12	29	0.104993	0.384793	Unigene0004417;Unigene0007693;Unigene0011072;Unigene0016388;Unigene0021833;Unigene0022556;Unigene0025923;Unigene0030913;Unigene0032177;Unigene0035100;Unigene0035419;Unigene0038753
GO:0043574	peroxisomal transport	12	29	0.104993	0.384793	Unigene0004417;Unigene0007693;Unigene0011072;Unigene0016388;Unigene0021833;Unigene0022556;Unigene0025923;Unigene0030913;Unigene0032177;Unigene0035100;Unigene0035419;Unigene0038753
GO:0072662	protein localization to peroxisome	12	29	0.104993	0.384793	Unigene0004417;Unigene0007693;Unigene0011072;Unigene0016388;Unigene0021833;Unigene0022556;Unigene0025923;Unigene0030913;Unigene0032177;Unigene0035100;Unigene0035419;Unigene0038753
GO:0072663	establishment of protein localization to peroxisome	12	29	0.104993	0.384793	Unigene0004417;Unigene0007693;Unigene0011072;Unigene0016388;Unigene0021833;Unigene0022556;Unigene0025923;Unigene0030913;Unigene0032177;Unigene0035100;Unigene0035419;Unigene0038753
GO:0006511	ubiquitin-dependent protein catabolic process	13	32	0.106623	0.389549	Unigene0005002;Unigene0005477;Unigene0007372;Unigene0020441;Unigene0024320;Unigene0032769;Unigene0036357;Unigene0036660;Unigene0037091;Unigene0039004;Unigene0039731;Unigene0040280;Unigene0040676
GO:0000097	sulfur amino acid biosynthetic process	31	87	0.106843	0.389549	Unigene0000341;Unigene0003577;Unigene0004021;Unigene0005187;Unigene0006358;Unigene0008127;Unigene0009495;Unigene0010007;Unigene0012835;Unigene0014690;Unigene0016332;Unigene0018548;Unigene0021522;Unigene0021984;Unigene0030225;Unigene0030772;Unigene0033633;Unigene0034255;Unigene0035971;Unigene0036221;Unigene0036901;Unigene0037175;Unigene0037722;Unigene0038287;Unigene0038391;Unigene0038598;Unigene00…
GO:0006006	glucose metabolic process	19	50	0.107431	0.390682	Unigene0000720;Unigene0001587;Unigene0002951;Unigene0007216;Unigene0008948;Unigene0011387;Unigene0012428;Unigene0021851;Unigene0022572;Unigene0022878;Unigene0033391;Unigene0034248;Unigene0035501;Unigene0035857;Unigene0036940;Unigene0037533;Unigene0038006;Unigene0039003;Unigene0039476
GO:0009886	post-embryonic morphogenesis	17	44	0.108326	0.392924	Unigene0000079;Unigene0003800;Unigene0009156;Unigene0012115;Unigene0012461;Unigene0012869;Unigene0012975;Unigene0013236;Unigene0016772;Unigene0017340;Unigene0018339;Unigene0022473;Unigene0024936;Unigene0033594;Unigene0036438;Unigene0041247;Unigene0041838
GO:0007602	phototransduction	7	15	0.112892	0.404293	Unigene0007733;Unigene0008378;Unigene0023749;Unigene0032808;Unigene0033198;Unigene0033821;Unigene0040676
GO:0009555	pollen development	7	15	0.112892	0.404293	Unigene0005514;Unigene0010746;Unigene0022940;Unigene0024579;Unigene0033594;Unigene0034399;Unigene0034500
GO:0009582	detection of abiotic stimulus	7	15	0.112892	0.404293	Unigene0007733;Unigene0008378;Unigene0023749;Unigene0032808;Unigene0033198;Unigene0033821;Unigene0040676
GO:0009583	detection of light stimulus	7	15	0.112892	0.404293	Unigene0007733;Unigene0008378;Unigene0023749;Unigene0032808;Unigene0033198;Unigene0033821;Unigene0040676
GO:0016051	carbohydrate biosynthetic process	7	15	0.112892	0.404293	Unigene0001344;Unigene0003466;Unigene0011329;Unigene0024227;Unigene0036106;Unigene0036766;Unigene0041658
GO:1901661	quinone metabolic process	4	7	0.113403	0.405091	Unigene0005326;Unigene0006097;Unigene0026395;Unigene0028105
GO:0071407	cellular response to organic cyclic compound	27	75	0.113738	0.405263	Unigene0005500;Unigene0009203;Unigene0010384;Unigene0010725;Unigene0011489;Unigene0011527;Unigene0013636;Unigene0013811;Unigene0015718;Unigene0017613;Unigene0018646;Unigene0022382;Unigene0023647;Unigene0030772;Unigene0033313;Unigene0033594;Unigene0035006;Unigene0035909;Unigene0036766;Unigene0036774;Unigene0037750;Unigene0038206;Unigene0038309;Unigene0040086;Unigene0041211;Unigene0041289;Unigene00…
GO:2000241	regulation of reproductive process	8	18	0.119872	0.426045	Unigene0000999;Unigene0001824;Unigene0005594;Unigene0022473;Unigene0031751;Unigene0033190;Unigene0033594;Unigene0033821
GO:0071702	organic substance transport	126	397	0.120388	0.426802	Unigene0000020;Unigene0000167;Unigene0000473;Unigene0000685;Unigene0000695;Unigene0000720;Unigene0000999;Unigene0001294;Unigene0001498;Unigene0001518;Unigene0002118;Unigene0002157;Unigene0002951;Unigene0003800;Unigene0004005;Unigene0004125;Unigene0004223;Unigene0004417;Unigene0004592;Unigene0006237;Unigene0006813;Unigene0007571;Unigene0007693;Unigene0008100;Unigene0009203;Unigene0009508;Unigene00…
GO:0043933	macromolecular complex subunit organization	131	414	0.123432	0.436498	Unigene0000054;Unigene0000079;Unigene0000253;Unigene0000660;Unigene0000690;Unigene0000695;Unigene0000774;Unigene0000922;Unigene0000938;Unigene0001241;Unigene0001284;Unigene0001727;Unigene0002131;Unigene0002141;Unigene0002272;Unigene0002304;Unigene0002332;Unigene0002588;Unigene0002708;Unigene0003800;Unigene0004300;Unigene0004712;Unigene0005002;Unigene0005477;Unigene0006616;Unigene0006998;Unigene00…
GO:0009756	carbohydrate mediated signaling	9	21	0.124574	0.43834	Unigene0002207;Unigene0015770;Unigene0022435;Unigene0023428;Unigene0023647;Unigene0024936;Unigene0030343;Unigene0032988;Unigene0034255
GO:0071322	cellular response to carbohydrate stimulus	9	21	0.124574	0.43834	Unigene0002207;Unigene0015770;Unigene0022435;Unigene0023428;Unigene0023647;Unigene0024936;Unigene0030343;Unigene0032988;Unigene0034255
GO:0006221	pyrimidine nucleotide biosynthetic process	18	48	0.127865	0.4488	Unigene0000473;Unigene0002107;Unigene0004445;Unigene0004751;Unigene0007482;Unigene0009999;Unigene0011387;Unigene0014645;Unigene0014713;Unigene0017346;Unigene0021304;Unigene0025866;Unigene0028310;Unigene0029333;Unigene0032706;Unigene0034117;Unigene0038006;Unigene0039142
GO:0060255	regulation of macromolecule metabolic process	249	809	0.12855	0.450083	Unigene0000051;Unigene0000054;Unigene0000079;Unigene0000101;Unigene0000144;Unigene0000163;Unigene0000180;Unigene0000262;Unigene0000282;Unigene0000341;Unigene0000454;Unigene0000480;Unigene0000494;Unigene0000689;Unigene0000690;Unigene0000695;Unigene0000739;Unigene0000774;Unigene0000859;Unigene0000922;Unigene0000997;Unigene0000999;Unigene0001005;Unigene0001824;Unigene0002066;Unigene0002141;Unigene00…
GO:0051128	regulation of cellular component organization	27	76	0.129618	0.451244	Unigene0000054;Unigene0000338;Unigene0000454;Unigene0000677;Unigene0005002;Unigene0011916;Unigene0014407;Unigene0014650;Unigene0017529;Unigene0017608;Unigene0020441;Unigene0022473;Unigene0023388;Unigene0024469;Unigene0024936;Unigene0026263;Unigene0032074;Unigene0032769;Unigene0034666;Unigene0035478;Unigene0037081;Unigene0037091;Unigene0037701;Unigene0038166;Unigene0038313;Unigene0040010;Unigene00…
GO:0033365	protein localization to organelle	16	42	0.129967	0.451244	Unigene0000473;Unigene0004417;Unigene0007693;Unigene0011072;Unigene0016388;Unigene0021833;Unigene0022556;Unigene0025923;Unigene0027684;Unigene0030913;Unigene0032177;Unigene0035100;Unigene0035357;Unigene0035419;Unigene0038753;Unigene0040969
GO:0006461	protein complex assembly	53	159	0.130427	0.451244	Unigene0001241;Unigene0002131;Unigene0002588;Unigene0002708;Unigene0003800;Unigene0005002;Unigene0005477;Unigene0006616;Unigene0006998;Unigene0011916;Unigene0012760;Unigene0013825;Unigene0013839;Unigene0014407;Unigene0017368;Unigene0017685;Unigene0018548;Unigene0019192;Unigene0019680;Unigene0021042;Unigene0022382;Unigene0022664;Unigene0022878;Unigene0024320;Unigene0024361;Unigene0025101;Unigene00…
GO:0009658	chloroplast organization	15	39	0.130692	0.451244	Unigene0002165;Unigene0003800;Unigene0003903;Unigene0003971;Unigene0006998;Unigene0013825;Unigene0014466;Unigene0023650;Unigene0025101;Unigene0026085;Unigene0029259;Unigene0033607;Unigene0035212;Unigene0037800;Unigene0038963
GO:0007031	peroxisome organization	12	30	0.130718	0.451244	Unigene0004417;Unigene0007693;Unigene0011072;Unigene0016388;Unigene0021833;Unigene0022556;Unigene0025923;Unigene0030913;Unigene0032177;Unigene0035100;Unigene0035419;Unigene0038753
GO:0010604	positive regulation of macromolecule metabolic process	14	36	0.13112	0.451244	Unigene0000101;Unigene0000739;Unigene0005532;Unigene0008856;Unigene0009203;Unigene0011689;Unigene0014877;Unigene0015655;Unigene0033265;Unigene0037777;Unigene0038017;Unigene0040743;Unigene0041247;Unigene0041670
GO:0034470	ncRNA processing	14	36	0.13112	0.451244	Unigene0000054;Unigene0013636;Unigene0022213;Unigene0024127;Unigene0026253;Unigene0026887;Unigene0027551;Unigene0033909;Unigene0034230;Unigene0034255;Unigene0036849;Unigene0037966;Unigene0038338;Unigene0041289
GO:0002682	regulation of immune system process	5	10	0.133584	0.457494	Unigene0017613;Unigene0018646;Unigene0020037;Unigene0025775;Unigene0035164
GO:0010927	cellular component assembly involved in morphogenesis	5	10	0.133584	0.457494	Unigene0005514;Unigene0010746;Unigene0024579;Unigene0033594;Unigene0034399
GO:0042221	response to chemical	182	586	0.137587	0.47006	Unigene0000051;Unigene0000341;Unigene0000720;Unigene0001294;Unigene0001783;Unigene0001824;Unigene0001952;Unigene0001953;Unigene0002005;Unigene0002190;Unigene0002207;Unigene0002211;Unigene0002448;Unigene0002455;Unigene0002502;Unigene0002625;Unigene0002802;Unigene0002881;Unigene0002943;Unigene0003293;Unigene0003577;Unigene0003826;Unigene0004125;Unigene0004237;Unigene0004751;Unigene0005002;Unigene00…
GO:0006163	purine nucleotide metabolic process	21	58	0.143167	0.486767	Unigene0002207;Unigene0003687;Unigene0004641;Unigene0007482;Unigene0009999;Unigene0014153;Unigene0021304;Unigene0022572;Unigene0022679;Unigene0024361;Unigene0025866;Unigene0027249;Unigene0028105;Unigene0030151;Unigene0032806;Unigene0034015;Unigene0034626;Unigene0035073;Unigene0038309;Unigene0039874;Unigene0041484
GO:0031047	gene silencing by RNA	21	58	0.143167	0.486767	Unigene0000079;Unigene0011489;Unigene0011527;Unigene0013636;Unigene0013811;Unigene0014931;Unigene0015718;Unigene0016046;Unigene0022382;Unigene0022473;Unigene0023647;Unigene0024137;Unigene0030772;Unigene0031349;Unigene0033313;Unigene0035006;Unigene0036774;Unigene0037750;Unigene0039250;Unigene0040086;Unigene0041289
GO:0017038	protein import	6	13	0.145393	0.489645	Unigene0000473;Unigene0027684;Unigene0035357;Unigene0036294;Unigene0040969;Unigene0041411
GO:0072657	protein localization to membrane	6	13	0.145393	0.489645	Unigene0006237;Unigene0015718;Unigene0021242;Unigene0036357;Unigene0040436;Unigene0042022
GO:0090150	establishment of protein localization to membrane	6	13	0.145393	0.489645	Unigene0006237;Unigene0015718;Unigene0021242;Unigene0036357;Unigene0040436;Unigene0042022
GO:0005982	starch metabolic process	20	55	0.145401	0.489645	Unigene0001009;Unigene0003292;Unigene0003906;Unigene0003971;Unigene0004992;Unigene0006727;Unigene0010384;Unigene0011679;Unigene0011805;Unigene0014466;Unigene0016450;Unigene0018725;Unigene0023650;Unigene0027576;Unigene0034082;Unigene0034588;Unigene0037800;Unigene0038914;Unigene0039874;Unigene0039928
GO:0048522	positive regulation of cellular process	19	52	0.1476	0.492955	Unigene0000101;Unigene0000739;Unigene0005532;Unigene0008856;Unigene0009203;Unigene0010725;Unigene0011689;Unigene0014407;Unigene0014877;Unigene0015655;Unigene0021029;Unigene0026263;Unigene0033265;Unigene0035478;Unigene0037777;Unigene0038017;Unigene0040743;Unigene0041247;Unigene0041670
GO:0000741	karyogamy	3	5	0.150098	0.492955	Unigene0025285;Unigene0028243;Unigene0036981
GO:0000819	sister chromatid segregation	3	5	0.150098	0.492955	Unigene0000279;Unigene0023311;Unigene0040010
GO:0007062	sister chromatid cohesion	3	5	0.150098	0.492955	Unigene0000279;Unigene0023311;Unigene0040010
GO:0010374	stomatal complex development	3	5	0.150098	0.492955	Unigene0009203;Unigene0015749;Unigene0017346
GO:0016032	viral process	3	5	0.150098	0.492955	Unigene0010442;Unigene0023891;Unigene0025683
GO:0019856	pyrimidine nucleobase biosynthetic process	3	5	0.150098	0.492955	Unigene0004445;Unigene0014645;Unigene0025866
GO:0030148	sphingolipid biosynthetic process	3	5	0.150098	0.492955	Unigene0020344;Unigene0027326;Unigene0039477
GO:0042723	thiamine-containing compound metabolic process	3	5	0.150098	0.492955	Unigene0004052;Unigene0035279;Unigene0038167
GO:0098813	nuclear chromosome segregation	3	5	0.150098	0.492955	Unigene0000279;Unigene0023311;Unigene0040010
GO:0043623	cellular protein complex assembly	46	138	0.150227	0.492955	Unigene0001241;Unigene0002131;Unigene0002588;Unigene0002708;Unigene0003800;Unigene0005002;Unigene0005477;Unigene0006998;Unigene0012760;Unigene0013825;Unigene0013839;Unigene0014407;Unigene0017368;Unigene0018548;Unigene0019192;Unigene0021042;Unigene0022382;Unigene0022664;Unigene0024320;Unigene0024361;Unigene0025101;Unigene0026085;Unigene0026263;Unigene0028456;Unigene0032769;Unigene0032808;Unigene00…
GO:0009909	regulation of flower development	7	16	0.152482	0.498039	Unigene0000999;Unigene0001824;Unigene0005594;Unigene0031751;Unigene0033190;Unigene0033594;Unigene0033821
GO:0048831	regulation of shoot system development	7	16	0.152482	0.498039	Unigene0000999;Unigene0001824;Unigene0005594;Unigene0031751;Unigene0033190;Unigene0033594;Unigene0033821
GO:0000226	microtubule cytoskeleton organization	15	40	0.155584	0.506995	Unigene0002708;Unigene0003903;Unigene0007164;Unigene0012431;Unigene0017685;Unigene0018898;Unigene0022382;Unigene0023388;Unigene0025372;Unigene0033617;Unigene0034972;Unigene0038017;Unigene0039742;Unigene0039783;Unigene0042070
GO:0051716	cellular response to stimulus	188	609	0.156102	0.507035	Unigene0000051;Unigene0000079;Unigene0000997;Unigene0001320;Unigene0001718;Unigene0001824;Unigene0001952;Unigene0002066;Unigene0002190;Unigene0002207;Unigene0002211;Unigene0002277;Unigene0002448;Unigene0002611;Unigene0002625;Unigene0002802;Unigene0002943;Unigene0003160;Unigene0003293;Unigene0003577;Unigene0004223;Unigene0004751;Unigene0005360;Unigene0005500;Unigene0005532;Unigene0007282;Unigene00…
GO:0042451	purine nucleoside biosynthetic process	8	19	0.156674	0.507035	Unigene0014153;Unigene0024361;Unigene0027249;Unigene0028105;Unigene0034626;Unigene0038309;Unigene0039874;Unigene0041484
GO:0046129	purine ribonucleoside biosynthetic process	8	19	0.156674	0.507035	Unigene0014153;Unigene0024361;Unigene0027249;Unigene0028105;Unigene0034626;Unigene0038309;Unigene0039874;Unigene0041484
GO:0009793	embryo development ending in seed dormancy	9	22	0.158977	0.510748	Unigene0002207;Unigene0005594;Unigene0019902;Unigene0022435;Unigene0023428;Unigene0026572;Unigene0030343;Unigene0032988;Unigene0036328
GO:0014070	response to organic cyclic compound	34	100	0.159257	0.510748	Unigene0001953;Unigene0005500;Unigene0009203;Unigene0009348;Unigene0010384;Unigene0010725;Unigene0011489;Unigene0011527;Unigene0013636;Unigene0013811;Unigene0015718;Unigene0017613;Unigene0018387;Unigene0018646;Unigene0022382;Unigene0023647;Unigene0030772;Unigene0032780;Unigene0033313;Unigene0033594;Unigene0033760;Unigene0033979;Unigene0035006;Unigene0035909;Unigene0036766;Unigene0036774;Unigene00…
GO:0016246	RNA interference	10	25	0.159993	0.510748	Unigene0011489;Unigene0011527;Unigene0013636;Unigene0015718;Unigene0022382;Unigene0023647;Unigene0030772;Unigene0036774;Unigene0037750;Unigene0041289
GO:0030422	production of siRNA involved in RNA interference	10	25	0.159993	0.510748	Unigene0011489;Unigene0011527;Unigene0013636;Unigene0015718;Unigene0022382;Unigene0023647;Unigene0030772;Unigene0036774;Unigene0037750;Unigene0041289
GO:0042278	purine nucleoside metabolic process	10	25	0.159993	0.510748	Unigene0014153;Unigene0024361;Unigene0027249;Unigene0027551;Unigene0028105;Unigene0028614;Unigene0034626;Unigene0038309;Unigene0039874;Unigene0041484
GO:0046128	purine ribonucleoside metabolic process	10	25	0.159993	0.510748	Unigene0014153;Unigene0024361;Unigene0027249;Unigene0027551;Unigene0028105;Unigene0028614;Unigene0034626;Unigene0038309;Unigene0039874;Unigene0041484
GO:0042743	hydrogen peroxide metabolic process	22	62	0.16127	0.513662	Unigene0001518;Unigene0001824;Unigene0007090;Unigene0009203;Unigene0009707;Unigene0010384;Unigene0010725;Unigene0012835;Unigene0017529;Unigene0017613;Unigene0018646;Unigene0027212;Unigene0032340;Unigene0032709;Unigene0035509;Unigene0036106;Unigene0037722;Unigene0038166;Unigene0038309;Unigene0040010;Unigene0041211;Unigene0041857
GO:0006220	pyrimidine nucleotide metabolic process	18	50	0.173544	0.539684	Unigene0000473;Unigene0002107;Unigene0004445;Unigene0004751;Unigene0007482;Unigene0009999;Unigene0011387;Unigene0014645;Unigene0014713;Unigene0017346;Unigene0021304;Unigene0025866;Unigene0028310;Unigene0029333;Unigene0032706;Unigene0034117;Unigene0038006;Unigene0039142
GO:0007059	chromosome segregation	18	50	0.173544	0.539684	Unigene0000054;Unigene0000279;Unigene0000454;Unigene0000677;Unigene0002207;Unigene0017608;Unigene0021883;Unigene0022435;Unigene0023311;Unigene0023428;Unigene0024137;Unigene0026572;Unigene0030343;Unigene0032074;Unigene0037091;Unigene0037701;Unigene0039617;Unigene0040010
GO:0001101	response to acid chemical	51	156	0.174162	0.539684	Unigene0000720;Unigene0001783;Unigene0001824;Unigene0002207;Unigene0002881;Unigene0005500;Unigene0007282;Unigene0008112;Unigene0008731;Unigene0009203;Unigene0009348;Unigene0010189;Unigene0010384;Unigene0010725;Unigene0010953;Unigene0011417;Unigene0011986;Unigene0013636;Unigene0013729;Unigene0017003;Unigene0017346;Unigene0017613;Unigene0018115;Unigene0018646;Unigene0021043;Unigene0022298;Unigene00…
GO:0072521	purine-containing compound metabolic process	24	69	0.175692	0.539684	Unigene0002207;Unigene0003687;Unigene0004641;Unigene0007482;Unigene0009999;Unigene0014153;Unigene0021304;Unigene0022572;Unigene0022679;Unigene0024361;Unigene0025866;Unigene0027249;Unigene0027551;Unigene0028105;Unigene0028614;Unigene0030151;Unigene0032806;Unigene0034015;Unigene0034626;Unigene0035073;Unigene0038309;Unigene0039145;Unigene0039874;Unigene0041484
GO:0006323	DNA packaging	4	8	0.176325	0.539684	Unigene0002141;Unigene0007820;Unigene0022473;Unigene0039250
GO:0006333	chromatin assembly or disassembly	4	8	0.176325	0.539684	Unigene0002141;Unigene0007820;Unigene0022473;Unigene0039250
GO:0006555	methionine metabolic process	4	8	0.176325	0.539684	Unigene0009495;Unigene0010007;Unigene0014690;Unigene0019680
GO:0006606	protein import into nucleus	4	8	0.176325	0.539684	Unigene0000473;Unigene0027684;Unigene0035357;Unigene0040969
GO:0006613	cotranslational protein targeting to membrane	4	8	0.176325	0.539684	Unigene0006237;Unigene0015718;Unigene0040436;Unigene0042022
GO:0019359	nicotinamide nucleotide biosynthetic process	4	8	0.176325	0.539684	Unigene0000532;Unigene0033470;Unigene0037260;Unigene0038363
GO:0019363	pyridine nucleotide biosynthetic process	4	8	0.176325	0.539684	Unigene0000532;Unigene0033470;Unigene0037260;Unigene0038363
GO:0031497	chromatin assembly	4	8	0.176325	0.539684	Unigene0002141;Unigene0007820;Unigene0022473;Unigene0039250
GO:0034504	protein localization to nucleus	4	8	0.176325	0.539684	Unigene0000473;Unigene0027684;Unigene0035357;Unigene0040969
GO:0043241	protein complex disassembly	4	8	0.176325	0.539684	Unigene0001727;Unigene0010581;Unigene0013825;Unigene0031799
GO:0043624	cellular protein complex disassembly	4	8	0.176325	0.539684	Unigene0001727;Unigene0010581;Unigene0013825;Unigene0031799
GO:0044744	protein targeting to nucleus	4	8	0.176325	0.539684	Unigene0000473;Unigene0027684;Unigene0035357;Unigene0040969
GO:0051170	nuclear import	4	8	0.176325	0.539684	Unigene0000473;Unigene0027684;Unigene0035357;Unigene0040969
GO:1902593	single-organism nuclear import	4	8	0.176325	0.539684	Unigene0000473;Unigene0027684;Unigene0035357;Unigene0040969
GO:0008202	steroid metabolic process	15	41	0.182788	0.557337	Unigene0000248;Unigene0000341;Unigene0005848;Unigene0007164;Unigene0009016;Unigene0010296;Unigene0018433;Unigene0020277;Unigene0020344;Unigene0021708;Unigene0024918;Unigene0027326;Unigene0037699;Unigene0039477;Unigene0039668
GO:0007275	multicellular organism development	152	492	0.182882	0.557337	Unigene0000051;Unigene0000054;Unigene0000079;Unigene0000230;Unigene0000248;Unigene0000265;Unigene0000480;Unigene0000660;Unigene0000690;Unigene0000922;Unigene0000938;Unigene0000999;Unigene0001455;Unigene0001824;Unigene0001952;Unigene0002066;Unigene0002141;Unigene0002207;Unigene0002269;Unigene0002332;Unigene0002448;Unigene0002625;Unigene0003383;Unigene0003800;Unigene0004293;Unigene0004483;Unigene00…
GO:0031399	regulation of protein modification process	27	79	0.184783	0.558661	Unigene0000101;Unigene0000739;Unigene0003800;Unigene0005532;Unigene0006998;Unigene0008856;Unigene0009203;Unigene0010725;Unigene0011689;Unigene0013825;Unigene0014877;Unigene0017346;Unigene0024936;Unigene0025101;Unigene0026085;Unigene0033265;Unigene0037077;Unigene0037777;Unigene0037800;Unigene0038017;Unigene0038309;Unigene0039874;Unigene0040743;Unigene0041211;Unigene0041247;Unigene0041670;Unigene00…
GO:0031325	positive regulation of cellular metabolic process	14	38	0.185771	0.558661	Unigene0000101;Unigene0000739;Unigene0005532;Unigene0008856;Unigene0009203;Unigene0011689;Unigene0014877;Unigene0015655;Unigene0033265;Unigene0037777;Unigene0038017;Unigene0040743;Unigene0041247;Unigene0041670
GO:0010629	negative regulation of gene expression	44	134	0.186032	0.558661	Unigene0000079;Unigene0000262;Unigene0000480;Unigene0000695;Unigene0000999;Unigene0002332;Unigene0006324;Unigene0010296;Unigene0010725;Unigene0011489;Unigene0011527;Unigene0011916;Unigene0012431;Unigene0013636;Unigene0013811;Unigene0014931;Unigene0015718;Unigene0016046;Unigene0016772;Unigene0022382;Unigene0022473;Unigene0023647;Unigene0024137;Unigene0024936;Unigene0025428;Unigene0026572;Unigene00…
GO:0005975	carbohydrate metabolic process	133	429	0.188074	0.558661	Unigene0000230;Unigene0000349;Unigene0000422;Unigene0000454;Unigene0000468;Unigene0000720;Unigene0001009;Unigene0001344;Unigene0001518;Unigene0001587;Unigene0001696;Unigene0002951;Unigene0003051;Unigene0003292;Unigene0003466;Unigene0003906;Unigene0003971;Unigene0004274;Unigene0004992;Unigene0005067;Unigene0005329;Unigene0005718;Unigene0005743;Unigene0005783;Unigene0006075;Unigene0006324;Unigene00…
GO:0001934	positive regulation of protein phosphorylation	13	35	0.188642	0.558661	Unigene0000101;Unigene0000739;Unigene0005532;Unigene0008856;Unigene0009203;Unigene0011689;Unigene0014877;Unigene0033265;Unigene0037777;Unigene0038017;Unigene0040743;Unigene0041247;Unigene0041670
GO:0010562	positive regulation of phosphorus metabolic process	13	35	0.188642	0.558661	Unigene0000101;Unigene0000739;Unigene0005532;Unigene0008856;Unigene0009203;Unigene0011689;Unigene0014877;Unigene0033265;Unigene0037777;Unigene0038017;Unigene0040743;Unigene0041247;Unigene0041670
GO:0031401	positive regulation of protein modification process	13	35	0.188642	0.558661	Unigene0000101;Unigene0000739;Unigene0005532;Unigene0008856;Unigene0009203;Unigene0011689;Unigene0014877;Unigene0033265;Unigene0037777;Unigene0038017;Unigene0040743;Unigene0041247;Unigene0041670
GO:0032270	positive regulation of cellular protein metabolic process	13	35	0.188642	0.558661	Unigene0000101;Unigene0000739;Unigene0005532;Unigene0008856;Unigene0009203;Unigene0011689;Unigene0014877;Unigene0033265;Unigene0037777;Unigene0038017;Unigene0040743;Unigene0041247;Unigene0041670
GO:0042327	positive regulation of phosphorylation	13	35	0.188642	0.558661	Unigene0000101;Unigene0000739;Unigene0005532;Unigene0008856;Unigene0009203;Unigene0011689;Unigene0014877;Unigene0033265;Unigene0037777;Unigene0038017;Unigene0040743;Unigene0041247;Unigene0041670
GO:0045937	positive regulation of phosphate metabolic process	13	35	0.188642	0.558661	Unigene0000101;Unigene0000739;Unigene0005532;Unigene0008856;Unigene0009203;Unigene0011689;Unigene0014877;Unigene0033265;Unigene0037777;Unigene0038017;Unigene0040743;Unigene0041247;Unigene0041670
GO:0051247	positive regulation of protein metabolic process	13	35	0.188642	0.558661	Unigene0000101;Unigene0000739;Unigene0005532;Unigene0008856;Unigene0009203;Unigene0011689;Unigene0014877;Unigene0033265;Unigene0037777;Unigene0038017;Unigene0040743;Unigene0041247;Unigene0041670
GO:0015988	energy coupled proton transmembrane transport, against electrochemical gradient	5	11	0.188781	0.558661	Unigene0014153;Unigene0015332;Unigene0017400;Unigene0018036;Unigene0027249
GO:1902600	hydrogen ion transmembrane transport	5	11	0.188781	0.558661	Unigene0014153;Unigene0015332;Unigene0017400;Unigene0018036;Unigene0027249
GO:0016265	death	26	76	0.18886	0.558661	Unigene0009203;Unigene0010384;Unigene0010725;Unigene0010796;Unigene0011986;Unigene0013071;Unigene0017613;Unigene0018646;Unigene0020193;Unigene0021833;Unigene0023470;Unigene0025179;Unigene0027576;Unigene0031751;Unigene0032780;Unigene0033086;Unigene0033594;Unigene0033979;Unigene0035909;Unigene0038206;Unigene0038309;Unigene0038707;Unigene0038753;Unigene0039767;Unigene0041211;Unigene0041857
GO:0044106	cellular amine metabolic process	12	32	0.191342	0.564496	Unigene0006075;Unigene0006876;Unigene0007358;Unigene0008854;Unigene0010189;Unigene0013506;Unigene0017613;Unigene0023482;Unigene0026341;Unigene0033030;Unigene0033591;Unigene0041182
GO:0071103	DNA conformation change	11	29	0.193788	0.564496	Unigene0002141;Unigene0003756;Unigene0007820;Unigene0020948;Unigene0022473;Unigene0023579;Unigene0034456;Unigene0035514;Unigene0035522;Unigene0039250;Unigene0039274
GO:0000271	polysaccharide biosynthetic process	6	14	0.19485	0.564496	Unigene0001344;Unigene0003466;Unigene0011329;Unigene0024227;Unigene0036106;Unigene0041658
GO:0042180	cellular ketone metabolic process	6	14	0.19485	0.564496	Unigene0005326;Unigene0006097;Unigene0012287;Unigene0026395;Unigene0028105;Unigene0041211
GO:0043473	pigmentation	6	14	0.19485	0.564496	Unigene0000265;Unigene0019902;Unigene0024341;Unigene0033594;Unigene0033910;Unigene0037508
GO:0043476	pigment accumulation	6	14	0.19485	0.564496	Unigene0000265;Unigene0019902;Unigene0024341;Unigene0033594;Unigene0033910;Unigene0037508
GO:0043478	pigment accumulation in response to UV light	6	14	0.19485	0.564496	Unigene0000265;Unigene0019902;Unigene0024341;Unigene0033594;Unigene0033910;Unigene0037508
GO:0043479	pigment accumulation in tissues in response to UV light	6	14	0.19485	0.564496	Unigene0000265;Unigene0019902;Unigene0024341;Unigene0033594;Unigene0033910;Unigene0037508
GO:0043480	pigment accumulation in tissues	6	14	0.19485	0.564496	Unigene0000265;Unigene0019902;Unigene0024341;Unigene0033594;Unigene0033910;Unigene0037508
GO:1901607	alpha-amino acid biosynthetic process	10	26	0.195859	0.564496	Unigene0004077;Unigene0007998;Unigene0009495;Unigene0010007;Unigene0014690;Unigene0020604;Unigene0033872;Unigene0035107;Unigene0039947;Unigene0041186
GO:0098655	cation transmembrane transport	9	23	0.197375	0.564496	Unigene0014153;Unigene0015332;Unigene0017400;Unigene0018036;Unigene0027249;Unigene0032780;Unigene0034431;Unigene0035528;Unigene0039625
GO:0007389	pattern specification process	24	70	0.197387	0.564496	Unigene0000480;Unigene0000690;Unigene0000922;Unigene0000999;Unigene0001952;Unigene0002269;Unigene0002625;Unigene0005086;Unigene0009203;Unigene0011489;Unigene0011534;Unigene0013636;Unigene0017529;Unigene0019902;Unigene0020233;Unigene0024936;Unigene0027144;Unigene0030772;Unigene0031349;Unigene0039250;Unigene0039263;Unigene0039617;Unigene0040128;Unigene0041289
GO:0000725	recombinational repair	7	17	0.197473	0.564496	Unigene0007955;Unigene0011916;Unigene0021883;Unigene0022473;Unigene0023497;Unigene0026572;Unigene0039274
GO:0048511	rhythmic process	7	17	0.197473	0.564496	Unigene0000863;Unigene0000997;Unigene0002881;Unigene0003906;Unigene0007955;Unigene0008378;Unigene0023749
GO:0034622	cellular macromolecular complex assembly	48	148	0.20043	0.564496	Unigene0001241;Unigene0002131;Unigene0002588;Unigene0002708;Unigene0003800;Unigene0005002;Unigene0005477;Unigene0006998;Unigene0012760;Unigene0013825;Unigene0013839;Unigene0014407;Unigene0017368;Unigene0018548;Unigene0019192;Unigene0021042;Unigene0022382;Unigene0022664;Unigene0024320;Unigene0024361;Unigene0025101;Unigene0026085;Unigene0026263;Unigene0028456;Unigene0029320;Unigene0032769;Unigene00…
GO:0008219	cell death	23	67	0.201851	0.564496	Unigene0009203;Unigene0010384;Unigene0010725;Unigene0010796;Unigene0011986;Unigene0013071;Unigene0017613;Unigene0018646;Unigene0023470;Unigene0025179;Unigene0027576;Unigene0031751;Unigene0032780;Unigene0033086;Unigene0033594;Unigene0033979;Unigene0035909;Unigene0038206;Unigene0038309;Unigene0038707;Unigene0039767;Unigene0041211;Unigene0041857
GO:0022613	ribonucleoprotein complex biogenesis	17	48	0.2034	0.564496	Unigene0000054;Unigene0001140;Unigene0004641;Unigene0007995;Unigene0015000;Unigene0024335;Unigene0026253;Unigene0029320;Unigene0033055;Unigene0033206;Unigene0033276;Unigene0033909;Unigene0034230;Unigene0036372;Unigene0037966;Unigene0038252;Unigene0038338
GO:0006541	glutamine metabolic process	2	3	0.203549	0.564496	Unigene0004953;Unigene0010189
GO:0006561	proline biosynthetic process	2	3	0.203549	0.564496	Unigene0007998;Unigene0041186
GO:0007623	circadian rhythm	2	3	0.203549	0.564496	Unigene0007955;Unigene0008378
GO:0008655	pyrimidine-containing compound salvage	2	3	0.203549	0.564496	Unigene0004052;Unigene0030832
GO:0009965	leaf morphogenesis	2	3	0.203549	0.564496	Unigene0019902;Unigene0024936
GO:0010016	shoot system morphogenesis	2	3	0.203549	0.564496	Unigene0019902;Unigene0024936
GO:0010191	mucilage metabolic process	2	3	0.203549	0.564496	Unigene0007216;Unigene0030907
GO:0010675	regulation of cellular carbohydrate metabolic process	2	3	0.203549	0.564496	Unigene0036106;Unigene0036766
GO:0042439	ethanolamine-containing compound metabolic process	2	3	0.203549	0.564496	Unigene0033030;Unigene0033591
GO:0042752	regulation of circadian rhythm	2	3	0.203549	0.564496	Unigene0007955;Unigene0008378
GO:0043650	dicarboxylic acid biosynthetic process	2	3	0.203549	0.564496	Unigene0023676;Unigene0036696
GO:0046341	CDP-diacylglycerol metabolic process	2	3	0.203549	0.564496	Unigene0033390;Unigene0041412
GO:0048366	leaf development	2	3	0.203549	0.564496	Unigene0019902;Unigene0024936
GO:0048645	organ formation	2	3	0.203549	0.564496	Unigene0000690;Unigene0019902
GO:1901701	cellular response to oxygen-containing compound	26	77	0.210317	0.564496	Unigene0002207;Unigene0005500;Unigene0008112;Unigene0009203;Unigene0010384;Unigene0010725;Unigene0010953;Unigene0011986;Unigene0015770;Unigene0017003;Unigene0017613;Unigene0018646;Unigene0022435;Unigene0023428;Unigene0023647;Unigene0024936;Unigene0026080;Unigene0030343;Unigene0032988;Unigene0034255;Unigene0035909;Unigene0036766;Unigene0038206;Unigene0038309;Unigene0041211;Unigene0041857
GO:1902589	single-organism organelle organization	96	308	0.213842	0.564496	Unigene0000054;Unigene0000217;Unigene0000253;Unigene0000279;Unigene0000454;Unigene0000660;Unigene0000677;Unigene0000695;Unigene0000774;Unigene0000922;Unigene0000938;Unigene0001284;Unigene0002215;Unigene0002272;Unigene0002332;Unigene0002708;Unigene0003903;Unigene0004300;Unigene0004417;Unigene0007164;Unigene0007693;Unigene0007955;Unigene0010611;Unigene0010843;Unigene0011072;Unigene0011387;Unigene00…
GO:0009790	embryo development	13	36	0.221154	0.564496	Unigene0000054;Unigene0002207;Unigene0004752;Unigene0005594;Unigene0019902;Unigene0022435;Unigene0023428;Unigene0026572;Unigene0030343;Unigene0032988;Unigene0035412;Unigene0036328;Unigene0040010
GO:0010941	regulation of cell death	19	55	0.221204	0.564496	Unigene0009203;Unigene0010384;Unigene0010725;Unigene0010796;Unigene0013071;Unigene0017613;Unigene0018646;Unigene0023470;Unigene0027576;Unigene0032780;Unigene0033086;Unigene0033979;Unigene0035909;Unigene0038206;Unigene0038309;Unigene0038707;Unigene0039767;Unigene0041211;Unigene0041857
GO:0043067	regulation of programmed cell death	19	55	0.221204	0.564496	Unigene0009203;Unigene0010384;Unigene0010725;Unigene0010796;Unigene0013071;Unigene0017613;Unigene0018646;Unigene0023470;Unigene0027576;Unigene0032780;Unigene0033086;Unigene0033979;Unigene0035909;Unigene0038206;Unigene0038309;Unigene0038707;Unigene0039767;Unigene0041211;Unigene0041857
GO:0006694	steroid biosynthetic process	12	33	0.225729	0.564496	Unigene0000248;Unigene0000341;Unigene0005848;Unigene0007164;Unigene0010296;Unigene0020277;Unigene0020344;Unigene0021708;Unigene0024918;Unigene0027326;Unigene0037699;Unigene0039477
GO:0009163	nucleoside biosynthetic process	12	33	0.225729	0.564496	Unigene0004445;Unigene0014153;Unigene0014645;Unigene0024361;Unigene0025866;Unigene0027249;Unigene0028105;Unigene0034626;Unigene0038006;Unigene0038309;Unigene0039874;Unigene0041484
GO:0032147	activation of protein kinase activity	12	33	0.225729	0.564496	Unigene0000101;Unigene0000739;Unigene0005532;Unigene0008856;Unigene0009203;Unigene0011689;Unigene0014877;Unigene0033265;Unigene0037777;Unigene0038017;Unigene0041247;Unigene0041670
GO:0033674	positive regulation of kinase activity	12	33	0.225729	0.564496	Unigene0000101;Unigene0000739;Unigene0005532;Unigene0008856;Unigene0009203;Unigene0011689;Unigene0014877;Unigene0033265;Unigene0037777;Unigene0038017;Unigene0041247;Unigene0041670
GO:0042455	ribonucleoside biosynthetic process	12	33	0.225729	0.564496	Unigene0004445;Unigene0014153;Unigene0014645;Unigene0024361;Unigene0025866;Unigene0027249;Unigene0028105;Unigene0034626;Unigene0038006;Unigene0038309;Unigene0039874;Unigene0041484
GO:0045860	positive regulation of protein kinase activity	12	33	0.225729	0.564496	Unigene0000101;Unigene0000739;Unigene0005532;Unigene0008856;Unigene0009203;Unigene0011689;Unigene0014877;Unigene0033265;Unigene0037777;Unigene0038017;Unigene0041247;Unigene0041670
GO:0051347	positive regulation of transferase activity	12	33	0.225729	0.564496	Unigene0000101;Unigene0000739;Unigene0005532;Unigene0008856;Unigene0009203;Unigene0011689;Unigene0014877;Unigene0033265;Unigene0037777;Unigene0038017;Unigene0041247;Unigene0041670
GO:0046467	membrane lipid biosynthetic process	11	30	0.230302	0.564496	Unigene0009348;Unigene0011417;Unigene0011679;Unigene0020344;Unigene0021235;Unigene0027326;Unigene0031818;Unigene0034431;Unigene0035914;Unigene0038166;Unigene0039477
GO:0043094	cellular metabolic compound salvage	17	49	0.231904	0.564496	Unigene0002455;Unigene0004052;Unigene0009495;Unigene0011011;Unigene0012760;Unigene0014690;Unigene0020764;Unigene0021042;Unigene0022664;Unigene0024361;Unigene0030832;Unigene0035419;Unigene0038309;Unigene0040385;Unigene0041116;Unigene0041307;Unigene0041989
GO:0009791	post-embryonic development	76	243	0.234128	0.564496	Unigene0000051;Unigene0000054;Unigene0000079;Unigene0000265;Unigene0000480;Unigene0000660;Unigene0000999;Unigene0001824;Unigene0002066;Unigene0002141;Unigene0002207;Unigene0002332;Unigene0002448;Unigene0003800;Unigene0005594;Unigene0008378;Unigene0009156;Unigene0009203;Unigene0010189;Unigene0011387;Unigene0011527;Unigene0011916;Unigene0012115;Unigene0012431;Unigene0012461;Unigene0012869;Unigene00…
GO:0006497	protein lipidation	10	27	0.23482	0.564496	Unigene0000146;Unigene0001696;Unigene0011011;Unigene0021042;Unigene0023247;Unigene0025923;Unigene0034007;Unigene0035909;Unigene0036901;Unigene0038753
GO:0009066	aspartate family amino acid metabolic process	10	27	0.23482	0.564496	Unigene0004021;Unigene0007998;Unigene0009495;Unigene0010007;Unigene0014690;Unigene0019680;Unigene0028310;Unigene0034901;Unigene0036189;Unigene0039947
GO:0042157	lipoprotein metabolic process	10	27	0.23482	0.564496	Unigene0000146;Unigene0001696;Unigene0011011;Unigene0021042;Unigene0023247;Unigene0025923;Unigene0034007;Unigene0035909;Unigene0036901;Unigene0038753
GO:0042158	lipoprotein biosynthetic process	10	27	0.23482	0.564496	Unigene0000146;Unigene0001696;Unigene0011011;Unigene0021042;Unigene0023247;Unigene0025923;Unigene0034007;Unigene0035909;Unigene0036901;Unigene0038753
GO:0000398	mRNA splicing, via spliceosome	3	6	0.23742	0.564496	Unigene0010818;Unigene0026644;Unigene0034255
GO:0009063	cellular amino acid catabolic process	3	6	0.23742	0.564496	Unigene0019680;Unigene0029579;Unigene0035509
GO:0051259	protein oligomerization	3	6	0.23742	0.564496	Unigene0019680;Unigene0022878;Unigene0035852
GO:0010033	response to organic substance	128	418	0.242792	0.564496	Unigene0000051;Unigene0001824;Unigene0001952;Unigene0001953;Unigene0002005;Unigene0002190;Unigene0002207;Unigene0002448;Unigene0002625;Unigene0002943;Unigene0003577;Unigene0003826;Unigene0004237;Unigene0005002;Unigene0005477;Unigene0005500;Unigene0008112;Unigene0009203;Unigene0009348;Unigene0010189;Unigene0010384;Unigene0010725;Unigene0010746;Unigene0010796;Unigene0010952;Unigene0010953;Unigene00…
GO:0009812	flavonoid metabolic process	8	21	0.243285	0.564496	Unigene0002190;Unigene0002448;Unigene0010746;Unigene0021708;Unigene0024747;Unigene0025775;Unigene0030832;Unigene0039476
GO:0048193	Golgi vesicle transport	8	21	0.243285	0.564496	Unigene0012657;Unigene0019227;Unigene0021833;Unigene0034500;Unigene0034602;Unigene0036357;Unigene0037587;Unigene0038753
GO:0098660	inorganic ion transmembrane transport	8	21	0.243285	0.564496	Unigene0014153;Unigene0015332;Unigene0017400;Unigene0018036;Unigene0027249;Unigene0034431;Unigene0035528;Unigene0039625
GO:0098662	inorganic cation transmembrane transport	8	21	0.243285	0.564496	Unigene0014153;Unigene0015332;Unigene0017400;Unigene0018036;Unigene0027249;Unigene0034431;Unigene0035528;Unigene0039625
GO:0009606	tropism	15	43	0.2434	0.564496	Unigene0000695;Unigene0000992;Unigene0003577;Unigene0007384;Unigene0007955;Unigene0009795;Unigene0015618;Unigene0017613;Unigene0019902;Unigene0021833;Unigene0024137;Unigene0028106;Unigene0032709;Unigene0033910;Unigene0034332
GO:0048646	anatomical structure formation involved in morphogenesis	15	43	0.2434	0.564496	Unigene0000079;Unigene0000690;Unigene0005514;Unigene0010746;Unigene0012461;Unigene0012869;Unigene0016772;Unigene0019902;Unigene0022473;Unigene0024579;Unigene0024936;Unigene0033594;Unigene0033910;Unigene0034399;Unigene0041838
GO:0072593	reactive oxygen species metabolic process	24	72	0.244466	0.564496	Unigene0001518;Unigene0001824;Unigene0007090;Unigene0009203;Unigene0009707;Unigene0010384;Unigene0010725;Unigene0012835;Unigene0017529;Unigene0017613;Unigene0018646;Unigene0027212;Unigene0032340;Unigene0032709;Unigene0035509;Unigene0035650;Unigene0036106;Unigene0037249;Unigene0037722;Unigene0038166;Unigene0038309;Unigene0040010;Unigene0041211;Unigene0041857
GO:0030154	cell differentiation	35	108	0.246475	0.564496	Unigene0000054;Unigene0000253;Unigene0000863;Unigene0000922;Unigene0001344;Unigene0001455;Unigene0001953;Unigene0002141;Unigene0002207;Unigene0002269;Unigene0007216;Unigene0011916;Unigene0012835;Unigene0017529;Unigene0017966;Unigene0021825;Unigene0022435;Unigene0023428;Unigene0024936;Unigene0026071;Unigene0027326;Unigene0030343;Unigene0032340;Unigene0033594;Unigene0033910;Unigene0034500;Unigene00…
GO:0044786	cell cycle DNA replication	7	18	0.246855	0.564496	Unigene0005002;Unigene0011916;Unigene0017346;Unigene0032769;Unigene0037091;Unigene0040676;Unigene0041963
GO:0005977	glycogen metabolic process	4	9	0.247822	0.564496	Unigene0001009;Unigene0036691;Unigene0039220;Unigene0039928
GO:0006112	energy reserve metabolic process	4	9	0.247822	0.564496	Unigene0001009;Unigene0036691;Unigene0039220;Unigene0039928
GO:0006612	protein targeting to membrane	4	9	0.247822	0.564496	Unigene0006237;Unigene0015718;Unigene0040436;Unigene0042022
GO:0007186	G-protein coupled receptor signaling pathway	4	9	0.247822	0.564496	Unigene0002611;Unigene0026080;Unigene0032709;Unigene0039825
GO:0009292	genetic transfer	4	9	0.247822	0.564496	Unigene0002332;Unigene0023497;Unigene0025487;Unigene0039109
GO:0010498	proteasomal protein catabolic process	4	9	0.247822	0.564496	Unigene0007372;Unigene0020441;Unigene0032769;Unigene0040280
GO:0022411	cellular component disassembly	4	9	0.247822	0.564496	Unigene0001727;Unigene0010581;Unigene0013825;Unigene0031799
GO:0032984	macromolecular complex disassembly	4	9	0.247822	0.564496	Unigene0001727;Unigene0010581;Unigene0013825;Unigene0031799
GO:0043161	proteasome-mediated ubiquitin-dependent protein catabolic process	4	9	0.247822	0.564496	Unigene0007372;Unigene0020441;Unigene0032769;Unigene0040280
GO:0048284	organelle fusion	4	9	0.247822	0.564496	Unigene0025285;Unigene0028243;Unigene0036173;Unigene0036981
GO:0008654	phospholipid biosynthetic process	14	40	0.249478	0.564496	Unigene0000054;Unigene0000786;Unigene0006157;Unigene0006837;Unigene0008569;Unigene0014786;Unigene0017183;Unigene0023338;Unigene0030225;Unigene0030807;Unigene0033591;Unigene0036221;Unigene0038945;Unigene0039742
GO:0009116	nucleoside metabolic process	14	40	0.249478	0.564496	Unigene0004445;Unigene0014153;Unigene0014645;Unigene0024361;Unigene0025866;Unigene0027249;Unigene0027551;Unigene0028105;Unigene0028614;Unigene0034626;Unigene0038006;Unigene0038309;Unigene0039874;Unigene0041484
GO:0009119	ribonucleoside metabolic process	14	40	0.249478	0.564496	Unigene0004445;Unigene0014153;Unigene0014645;Unigene0024361;Unigene0025866;Unigene0027249;Unigene0027551;Unigene0028105;Unigene0028614;Unigene0034626;Unigene0038006;Unigene0038309;Unigene0039874;Unigene0041484
GO:0010410	hemicellulose metabolic process	14	40	0.249478	0.564496	Unigene0000454;Unigene0001518;Unigene0005067;Unigene0006075;Unigene0015485;Unigene0018916;Unigene0020513;Unigene0024137;Unigene0027625;Unigene0032709;Unigene0034500;Unigene0034857;Unigene0036933;Unigene0037091
GO:0045491	xylan metabolic process	14	40	0.249478	0.564496	Unigene0000454;Unigene0001518;Unigene0005067;Unigene0006075;Unigene0015485;Unigene0018916;Unigene0020513;Unigene0024137;Unigene0027625;Unigene0032709;Unigene0034500;Unigene0034857;Unigene0036933;Unigene0037091
GO:0006714	sesquiterpenoid metabolic process	5	12	0.250381	0.564496	Unigene0009608;Unigene0028369;Unigene0036438;Unigene0037319;Unigene0040783
GO:0030258	lipid modification	5	12	0.250381	0.564496	Unigene0001728;Unigene0021708;Unigene0033940;Unigene0037689;Unigene0039668
GO:0032958	inositol phosphate biosynthetic process	5	12	0.250381	0.564496	Unigene0002190;Unigene0011679;Unigene0024623;Unigene0028456;Unigene0036766
GO:0046173	polyol biosynthetic process	5	12	0.250381	0.564496	Unigene0002190;Unigene0011679;Unigene0024623;Unigene0028456;Unigene0036766
GO:0006575	cellular modified amino acid metabolic process	13	37	0.255794	0.564496	Unigene0002321;Unigene0004077;Unigene0018077;Unigene0018305;Unigene0020604;Unigene0021984;Unigene0024333;Unigene0033872;Unigene0034985;Unigene0035107;Unigene0039419;Unigene0041182;Unigene0041399
GO:0034285	response to disaccharide	11	31	0.269204	0.564496	Unigene0000051;Unigene0002005;Unigene0002190;Unigene0010384;Unigene0010746;Unigene0020764;Unigene0024747;Unigene0026256;Unigene0032177;Unigene0033633;Unigene0039476
GO:0007010	cytoskeleton organization	30	93	0.277348	0.564496	Unigene0000054;Unigene0000253;Unigene0000922;Unigene0002215;Unigene0002708;Unigene0003903;Unigene0007164;Unigene0010843;Unigene0011916;Unigene0012431;Unigene0012479;Unigene0014407;Unigene0017529;Unigene0017685;Unigene0018898;Unigene0022382;Unigene0023388;Unigene0024936;Unigene0025372;Unigene0026263;Unigene0033617;Unigene0033910;Unigene0034972;Unigene0035478;Unigene0038017;Unigene0038166;Unigene00…
GO:0051276	chromosome organization	83	270	0.281802	0.564496	Unigene0000079;Unigene0000279;Unigene0000454;Unigene0000660;Unigene0000677;Unigene0000690;Unigene0000695;Unigene0000774;Unigene0000938;Unigene0001284;Unigene0002141;Unigene0002272;Unigene0002304;Unigene0002332;Unigene0003756;Unigene0004300;Unigene0004712;Unigene0007820;Unigene0007955;Unigene0008176;Unigene0010051;Unigene0010611;Unigene0011387;Unigene0011489;Unigene0011916;Unigene0012431;Unigene00…
GO:0042445	hormone metabolic process	9	25	0.283744	0.564496	Unigene0000341;Unigene0007358;Unigene0007818;Unigene0010189;Unigene0012835;Unigene0013506;Unigene0017613;Unigene0017966;Unigene0036328
GO:0051235	maintenance of location	9	25	0.283744	0.564496	Unigene0000685;Unigene0002207;Unigene0015770;Unigene0022435;Unigene0023428;Unigene0023647;Unigene0024936;Unigene0030343;Unigene0034255
GO:0010383	cell wall polysaccharide metabolic process	14	41	0.284057	0.564496	Unigene0000454;Unigene0001518;Unigene0005067;Unigene0006075;Unigene0015485;Unigene0018916;Unigene0020513;Unigene0024137;Unigene0027625;Unigene0032709;Unigene0034500;Unigene0034857;Unigene0036933;Unigene0037091
GO:0035966	response to topologically incorrect protein	14	41	0.284057	0.564496	Unigene0005002;Unigene0005477;Unigene0012760;Unigene0021042;Unigene0022664;Unigene0024320;Unigene0024361;Unigene0032769;Unigene0036357;Unigene0036660;Unigene0037091;Unigene0039731;Unigene0040385;Unigene0040676
GO:0071822	protein complex subunit organization	68	220	0.286763	0.564496	Unigene0000054;Unigene0000253;Unigene0000922;Unigene0001241;Unigene0001727;Unigene0002131;Unigene0002588;Unigene0002708;Unigene0003800;Unigene0004712;Unigene0005002;Unigene0005477;Unigene0006616;Unigene0006998;Unigene0010581;Unigene0010843;Unigene0011916;Unigene0012760;Unigene0013825;Unigene0013839;Unigene0014407;Unigene0017368;Unigene0017529;Unigene0017685;Unigene0018548;Unigene0019192;Unigene00…
GO:0000023	maltose metabolic process	1	1	0.290049	0.564496	Unigene0003906
GO:0000086	G2/M transition of mitotic cell cycle	1	1	0.290049	0.564496	Unigene0007733
GO:0000187	activation of MAPK activity	1	1	0.290049	0.564496	Unigene0009203
GO:0006011	UDP-glucose metabolic process	1	1	0.290049	0.564496	Unigene0000138
GO:0006063	uronic acid metabolic process	1	1	0.290049	0.564496	Unigene0020357
GO:0006071	glycerol metabolic process	1	1	0.290049	0.564496	Unigene0006746
GO:0006167	AMP biosynthetic process	1	1	0.290049	0.564496	Unigene0041484
GO:0006636	unsaturated fatty acid biosynthetic process	1	1	0.290049	0.564496	Unigene0000252
GO:0006658	phosphatidylserine metabolic process	1	1	0.290049	0.564496	Unigene0024333
GO:0007020	microtubule nucleation	1	1	0.290049	0.564496	Unigene0039742
GO:0007052	mitotic spindle organization	1	1	0.290049	0.564496	Unigene0023388
GO:0007131	reciprocal meiotic recombination	1	1	0.290049	0.564496	Unigene0022473
GO:0007163	establishment or maintenance of cell polarity	1	1	0.290049	0.564496	Unigene0035412
GO:0009068	aspartate family amino acid catabolic process	1	1	0.290049	0.564496	Unigene0019680
GO:0009087	methionine catabolic process	1	1	0.290049	0.564496	Unigene0019680
GO:0009133	nucleoside diphosphate biosynthetic process	1	1	0.290049	0.564496	Unigene0009325
GO:0009138	pyrimidine nucleoside diphosphate metabolic process	1	1	0.290049	0.564496	Unigene0009325
GO:0009139	pyrimidine nucleoside diphosphate biosynthetic process	1	1	0.290049	0.564496	Unigene0009325
GO:0009143	nucleoside triphosphate catabolic process	1	1	0.290049	0.564496	Unigene0031626
GO:0009157	deoxyribonucleoside monophosphate biosynthetic process	1	1	0.290049	0.564496	Unigene0033872
GO:0009162	deoxyribonucleoside monophosphate metabolic process	1	1	0.290049	0.564496	Unigene0033872
GO:0009176	pyrimidine deoxyribonucleoside monophosphate metabolic process	1	1	0.290049	0.564496	Unigene0033872
GO:0009177	pyrimidine deoxyribonucleoside monophosphate biosynthetic process	1	1	0.290049	0.564496	Unigene0033872
GO:0009186	deoxyribonucleoside diphosphate metabolic process	1	1	0.290049	0.564496	Unigene0009325
GO:0009189	deoxyribonucleoside diphosphate biosynthetic process	1	1	0.290049	0.564496	Unigene0009325
GO:0009196	pyrimidine deoxyribonucleoside diphosphate metabolic process	1	1	0.290049	0.564496	Unigene0009325
GO:0009197	pyrimidine deoxyribonucleoside diphosphate biosynthetic process	1	1	0.290049	0.564496	Unigene0009325
GO:0009303	rRNA transcription	1	1	0.290049	0.564496	Unigene0009383
GO:0009403	toxin biosynthetic process	1	1	0.290049	0.564496	Unigene0009203
GO:0009438	methylglyoxal metabolic process	1	1	0.290049	0.564496	Unigene0012287
GO:0009644	response to high light intensity	1	1	0.290049	0.564496	Unigene0029807
GO:0009700	indole phytoalexin biosynthetic process	1	1	0.290049	0.564496	Unigene0009203
GO:0009718	anthocyanin-containing compound biosynthetic process	1	1	0.290049	0.564496	Unigene0002448
GO:0009720	detection of hormone stimulus	1	1	0.290049	0.564496	Unigene0033594
GO:0009726	detection of endogenous stimulus	1	1	0.290049	0.564496	Unigene0033594
GO:0009740	gibberellic acid mediated signaling pathway	1	1	0.290049	0.564496	Unigene0036766
GO:0009853	photorespiration	1	1	0.290049	0.564496	Unigene0041307
GO:0009910	negative regulation of flower development	1	1	0.290049	0.564496	Unigene0031751
GO:0009937	regulation of gibberellic acid mediated signaling pathway	1	1	0.290049	0.564496	Unigene0036766
GO:0009954	proximal/distal pattern formation	1	1	0.290049	0.564496	Unigene0013636
GO:0009967	positive regulation of signal transduction	1	1	0.290049	0.564496	Unigene0009203
GO:0010160	formation of organ boundary	1	1	0.290049	0.564496	Unigene0000690
GO:0010228	vegetative to reproductive phase transition of meristem	1	1	0.290049	0.564496	Unigene0023749
GO:0010337	regulation of salicylic acid metabolic process	1	1	0.290049	0.564496	Unigene0041211
GO:0010375	stomatal complex patterning	1	1	0.290049	0.564496	Unigene0009203
GO:0010389	regulation of G2/M transition of mitotic cell cycle	1	1	0.290049	0.564496	Unigene0007733
GO:0010413	glucuronoxylan metabolic process	1	1	0.290049	0.564496	Unigene0005067
GO:0010517	regulation of phospholipase activity	1	1	0.290049	0.564496	Unigene0036766
GO:0010518	positive regulation of phospholipase activity	1	1	0.290049	0.564496	Unigene0036766
GO:0010520	regulation of reciprocal meiotic recombination	1	1	0.290049	0.564496	Unigene0022473
GO:0010557	positive regulation of macromolecule biosynthetic process	1	1	0.290049	0.564496	Unigene0015655
GO:0010628	positive regulation of gene expression	1	1	0.290049	0.564496	Unigene0015655
GO:0010863	positive regulation of phospholipase C activity	1	1	0.290049	0.564496	Unigene0036766
GO:0010919	regulation of inositol phosphate biosynthetic process	1	1	0.290049	0.564496	Unigene0036766
GO:0010948	negative regulation of cell cycle process	1	1	0.290049	0.564496	Unigene0032769
GO:0010962	regulation of glucan biosynthetic process	1	1	0.290049	0.564496	Unigene0036106
GO:0015766	disaccharide transport	1	1	0.290049	0.564496	Unigene0016475
GO:0015772	oligosaccharide transport	1	1	0.290049	0.564496	Unigene0016475
GO:0015936	coenzyme A metabolic process	1	1	0.290049	0.564496	Unigene0028105
GO:0015937	coenzyme A biosynthetic process	1	1	0.290049	0.564496	Unigene0028105
GO:0015976	carbon utilization	1	1	0.290049	0.564496	Unigene0036861
GO:0016106	sesquiterpenoid biosynthetic process	1	1	0.290049	0.564496	Unigene0040783
GO:0016117	carotenoid biosynthetic process	1	1	0.290049	0.564496	Unigene0009156
GO:0016226	iron-sulfur cluster assembly	1	1	0.290049	0.564496	Unigene0012617
GO:0016556	mRNA modification	1	1	0.290049	0.564496	Unigene0013433
GO:0018195	peptidyl-arginine modification	1	1	0.290049	0.564496	Unigene0019537
GO:0018216	peptidyl-arginine methylation	1	1	0.290049	0.564496	Unigene0019537
GO:0018871	1-aminocyclopropane-1-carboxylate metabolic process	1	1	0.290049	0.564496	Unigene0002806
GO:0019058	viral life cycle	1	1	0.290049	0.564496	Unigene0010442
GO:0019079	viral genome replication	1	1	0.290049	0.564496	Unigene0010442
GO:0019357	nicotinate nucleotide biosynthetic process	1	1	0.290049	0.564496	Unigene0000532
GO:0019400	alditol metabolic process	1	1	0.290049	0.564496	Unigene0006746
GO:0019418	sulfide oxidation	1	1	0.290049	0.564496	Unigene0000341
GO:0019499	cyanide metabolic process	1	1	0.290049	0.564496	Unigene0012835
GO:0019566	arabinose metabolic process	1	1	0.290049	0.564496	Unigene0033518
GO:0019586	galacturonate metabolic process	1	1	0.290049	0.564496	Unigene0020357
GO:0019627	urea metabolic process	1	1	0.290049	0.564496	Unigene0027684
GO:0023056	positive regulation of signaling	1	1	0.290049	0.564496	Unigene0009203
GO:0031109	microtubule polymerization or depolymerization	1	1	0.290049	0.564496	Unigene0039742
GO:0031163	metallo-sulfur cluster assembly	1	1	0.290049	0.564496	Unigene0012617
GO:0031328	positive regulation of cellular biosynthetic process	1	1	0.290049	0.564496	Unigene0015655
GO:0032465	regulation of cytokinesis	1	1	0.290049	0.564496	Unigene0023388
GO:0032786	positive regulation of DNA-templated transcription, elongation	1	1	0.290049	0.564496	Unigene0015655
GO:0032881	regulation of polysaccharide metabolic process	1	1	0.290049	0.564496	Unigene0036106
GO:0032885	regulation of polysaccharide biosynthetic process	1	1	0.290049	0.564496	Unigene0036106
GO:0032886	regulation of microtubule-based process	1	1	0.290049	0.564496	Unigene0023388
GO:0033477	S-methylmethionine metabolic process	1	1	0.290049	0.564496	Unigene0021984
GO:0033559	unsaturated fatty acid metabolic process	1	1	0.290049	0.564496	Unigene0000252
GO:0033865	nucleoside bisphosphate metabolic process	1	1	0.290049	0.564496	Unigene0028105
GO:0033866	nucleoside bisphosphate biosynthetic process	1	1	0.290049	0.564496	Unigene0028105
GO:0033875	ribonucleoside bisphosphate metabolic process	1	1	0.290049	0.564496	Unigene0028105
GO:0034030	ribonucleoside bisphosphate biosynthetic process	1	1	0.290049	0.564496	Unigene0028105
GO:0034032	purine nucleoside bisphosphate metabolic process	1	1	0.290049	0.564496	Unigene0028105
GO:0034033	purine nucleoside bisphosphate biosynthetic process	1	1	0.290049	0.564496	Unigene0028105
GO:0034969	histone arginine methylation	1	1	0.290049	0.564496	Unigene0019537
GO:0034982	mitochondrial protein processing	1	1	0.290049	0.564496	Unigene0007681
GO:0035337	fatty-acyl-CoA metabolic process	1	1	0.290049	0.564496	Unigene0004237
GO:0035510	DNA dealkylation	1	1	0.290049	0.564496	Unigene0038886
GO:0035825	reciprocal DNA recombination	1	1	0.290049	0.564496	Unigene0022473
GO:0040030	regulation of molecular function, epigenetic	1	1	0.290049	0.564496	Unigene0002332
GO:0042435	indole-containing compound biosynthetic process	1	1	0.290049	0.564496	Unigene0009203
GO:0042822	pyridoxal phosphate metabolic process	1	1	0.290049	0.564496	Unigene0021825
GO:0042823	pyridoxal phosphate biosynthetic process	1	1	0.290049	0.564496	Unigene0021825
GO:0043406	positive regulation of MAP kinase activity	1	1	0.290049	0.564496	Unigene0009203
GO:0043410	positive regulation of MAPK cascade	1	1	0.290049	0.564496	Unigene0009203
GO:0043487	regulation of RNA stability	1	1	0.290049	0.564496	Unigene0031799
GO:0043488	regulation of mRNA stability	1	1	0.290049	0.564496	Unigene0031799
GO:0044839	cell cycle G2/M phase transition	1	1	0.290049	0.564496	Unigene0007733
GO:0045488	pectin metabolic process	1	1	0.290049	0.564496	Unigene0001344
GO:0045489	pectin biosynthetic process	1	1	0.290049	0.564496	Unigene0001344
GO:0045893	positive regulation of transcription, DNA-templated	1	1	0.290049	0.564496	Unigene0015655
GO:0045935	positive regulation of nucleobase-containing compound metabolic process	1	1	0.290049	0.564496	Unigene0015655
GO:0046033	AMP metabolic process	1	1	0.290049	0.564496	Unigene0041484
GO:0046184	aldehyde biosynthetic process	1	1	0.290049	0.564496	Unigene0021825
GO:0046217	indole phytoalexin metabolic process	1	1	0.290049	0.564496	Unigene0009203
GO:0046283	anthocyanin-containing compound metabolic process	1	1	0.290049	0.564496	Unigene0002448
GO:0046416	D-amino acid metabolic process	1	1	0.290049	0.564496	Unigene0010360
GO:0046452	dihydrofolate metabolic process	1	1	0.290049	0.564496	Unigene0004077
GO:0046459	short-chain fatty acid metabolic process	1	1	0.290049	0.564496	Unigene0022554
GO:0046497	nicotinate nucleotide metabolic process	1	1	0.290049	0.564496	Unigene0000532
GO:0046785	microtubule polymerization	1	1	0.290049	0.564496	Unigene0039742
GO:0048311	mitochondrion distribution	1	1	0.290049	0.564496	Unigene0000217
GO:0048572	short-day photoperiodism	1	1	0.290049	0.564496	Unigene0023428
GO:0048573	photoperiodism, flowering	1	1	0.290049	0.564496	Unigene0023749
GO:0048581	negative regulation of post-embryonic development	1	1	0.290049	0.564496	Unigene0031751
GO:0048582	positive regulation of post-embryonic development	1	1	0.290049	0.564496	Unigene0023749
GO:0048859	formation of anatomical boundary	1	1	0.290049	0.564496	Unigene0000690
GO:0051094	positive regulation of developmental process	1	1	0.290049	0.564496	Unigene0023749
GO:0051098	regulation of binding	1	1	0.290049	0.564496	Unigene0039742
GO:0051099	positive regulation of binding	1	1	0.290049	0.564496	Unigene0039742
GO:0051173	positive regulation of nitrogen compound metabolic process	1	1	0.290049	0.564496	Unigene0015655
GO:0051205	protein insertion into membrane	1	1	0.290049	0.564496	Unigene0036357
GO:0051240	positive regulation of multicellular organismal process	1	1	0.290049	0.564496	Unigene0023749
GO:0051241	negative regulation of multicellular organismal process	1	1	0.290049	0.564496	Unigene0031751
GO:0051254	positive regulation of RNA metabolic process	1	1	0.290049	0.564496	Unigene0015655
GO:0051345	positive regulation of hydrolase activity	1	1	0.290049	0.564496	Unigene0036766
GO:0051646	mitochondrion localization	1	1	0.290049	0.564496	Unigene0000217
GO:0051668	localization within membrane	1	1	0.290049	0.564496	Unigene0016287
GO:0052314	phytoalexin metabolic process	1	1	0.290049	0.564496	Unigene0009203
GO:0052315	phytoalexin biosynthetic process	1	1	0.290049	0.564496	Unigene0009203
GO:0060147	regulation of posttranscriptional gene silencing	1	1	0.290049	0.564496	Unigene0010296
GO:0060191	regulation of lipase activity	1	1	0.290049	0.564496	Unigene0036766
GO:0060193	positive regulation of lipase activity	1	1	0.290049	0.564496	Unigene0036766
GO:0060631	regulation of meiosis I	1	1	0.290049	0.564496	Unigene0022473
GO:0060968	regulation of gene silencing	1	1	0.290049	0.564496	Unigene0010296
GO:0070507	regulation of microtubule cytoskeleton organization	1	1	0.290049	0.564496	Unigene0023388
GO:0071902	positive regulation of protein serine/threonine kinase activity	1	1	0.290049	0.564496	Unigene0009203
GO:0071941	nitrogen cycle metabolic process	1	1	0.290049	0.564496	Unigene0027684
GO:0072387	flavin adenine dinucleotide metabolic process	1	1	0.290049	0.564496	Unigene0004594
GO:0098781	ncRNA transcription	1	1	0.290049	0.564496	Unigene0009383
GO:1900274	regulation of phospholipase C activity	1	1	0.290049	0.564496	Unigene0036766
GO:1902533	positive regulation of intracellular signal transduction	1	1	0.290049	0.564496	Unigene0009203
GO:1902680	positive regulation of RNA biosynthetic process	1	1	0.290049	0.564496	Unigene0015655
GO:1902749	regulation of cell cycle G2/M phase transition	1	1	0.290049	0.564496	Unigene0007733
GO:1902930	regulation of alcohol biosynthetic process	1	1	0.290049	0.564496	Unigene0036766
GO:1903508	positive regulation of nucleic acid-templated transcription	1	1	0.290049	0.564496	Unigene0015655
GO:2000242	negative regulation of reproductive process	1	1	0.290049	0.564496	Unigene0031751
GO:0034754	cellular hormone metabolic process	8	22	0.291461	0.56635	Unigene0000341;Unigene0007358;Unigene0007818;Unigene0010189;Unigene0012835;Unigene0013506;Unigene0017613;Unigene0017966
GO:0090558	plant epidermis development	13	38	0.292206	0.56635	Unigene0000054;Unigene0000922;Unigene0001455;Unigene0009203;Unigene0011916;Unigene0015749;Unigene0017346;Unigene0017529;Unigene0021825;Unigene0024936;Unigene0033910;Unigene0038166;Unigene0041247
GO:1901617	organic hydroxy compound biosynthetic process	13	38	0.292206	0.56635	Unigene0000248;Unigene0002190;Unigene0007164;Unigene0010296;Unigene0011679;Unigene0017984;Unigene0020277;Unigene0021825;Unigene0024623;Unigene0028456;Unigene0033591;Unigene0036766;Unigene0039664
GO:0001558	regulation of cell growth	7	19	0.299461	0.577239	Unigene0000054;Unigene0005002;Unigene0011916;Unigene0014650;Unigene0032769;Unigene0037091;Unigene0040676
GO:0048444	floral organ morphogenesis	7	19	0.299461	0.577239	Unigene0000079;Unigene0012461;Unigene0012869;Unigene0016772;Unigene0022473;Unigene0024936;Unigene0041838
GO:0048449	floral organ formation	7	19	0.299461	0.577239	Unigene0000079;Unigene0012461;Unigene0012869;Unigene0016772;Unigene0022473;Unigene0024936;Unigene0041838
GO:0048563	post-embryonic organ morphogenesis	7	19	0.299461	0.577239	Unigene0000079;Unigene0012461;Unigene0012869;Unigene0016772;Unigene0022473;Unigene0024936;Unigene0041838
GO:0019220	regulation of phosphate metabolic process	16	48	0.301768	0.580101	Unigene0000101;Unigene0000739;Unigene0005532;Unigene0008856;Unigene0009203;Unigene0011689;Unigene0014877;Unigene0017346;Unigene0033265;Unigene0036766;Unigene0037077;Unigene0037777;Unigene0038017;Unigene0040743;Unigene0041247;Unigene0041670
GO:0051174	regulation of phosphorus metabolic process	16	48	0.301768	0.580101	Unigene0000101;Unigene0000739;Unigene0005532;Unigene0008856;Unigene0009203;Unigene0011689;Unigene0014877;Unigene0017346;Unigene0033265;Unigene0036766;Unigene0037077;Unigene0037777;Unigene0038017;Unigene0040743;Unigene0041247;Unigene0041670
GO:0016049	cell growth	19	58	0.307846	0.590178	Unigene0000054;Unigene0000240;Unigene0000863;Unigene0000922;Unigene0001952;Unigene0005002;Unigene0008948;Unigene0011916;Unigene0014650;Unigene0017966;Unigene0026071;Unigene0032769;Unigene0033594;Unigene0033910;Unigene0036095;Unigene0037091;Unigene0037441;Unigene0037533;Unigene0040676
GO:0051726	regulation of cell cycle	19	58	0.307846	0.590178	Unigene0000695;Unigene0002141;Unigene0002207;Unigene0005002;Unigene0007733;Unigene0011916;Unigene0017346;Unigene0020441;Unigene0021029;Unigene0022435;Unigene0022473;Unigene0023388;Unigene0023428;Unigene0026572;Unigene0030343;Unigene0032769;Unigene0034666;Unigene0037091;Unigene0039250
GO:0045017	glycerolipid biosynthetic process	11	32	0.309988	0.592674	Unigene0000054;Unigene0006157;Unigene0006837;Unigene0014786;Unigene0017183;Unigene0023338;Unigene0030225;Unigene0030807;Unigene0033591;Unigene0036221;Unigene0039742
GO:0046474	glycerophospholipid biosynthetic process	11	32	0.309988	0.592674	Unigene0000054;Unigene0006157;Unigene0006837;Unigene0014786;Unigene0017183;Unigene0023338;Unigene0030225;Unigene0030807;Unigene0033591;Unigene0036221;Unigene0039742
GO:0006457	protein folding	5	13	0.315999	0.599664	Unigene0011369;Unigene0015342;Unigene0029325;Unigene0038102;Unigene0039154
GO:0008033	tRNA processing	5	13	0.315999	0.599664	Unigene0022213;Unigene0024127;Unigene0026887;Unigene0027551;Unigene0036849
GO:0051640	organelle localization	5	13	0.315999	0.599664	Unigene0000217;Unigene0002165;Unigene0026743;Unigene0035419;Unigene0038833
GO:0000280	nuclear division	18	55	0.316624	0.599664	Unigene0000238;Unigene0000454;Unigene0000677;Unigene0005002;Unigene0011301;Unigene0013182;Unigene0016772;Unigene0020441;Unigene0022473;Unigene0023311;Unigene0024936;Unigene0032074;Unigene0032769;Unigene0034584;Unigene0034666;Unigene0037081;Unigene0037091;Unigene0037701
GO:0009751	response to salicylic acid	10	29	0.319768	0.599664	Unigene0009203;Unigene0010384;Unigene0010725;Unigene0017613;Unigene0018646;Unigene0035909;Unigene0038206;Unigene0038309;Unigene0041211;Unigene0041857
GO:0009863	salicylic acid mediated signaling pathway	10	29	0.319768	0.599664	Unigene0009203;Unigene0010384;Unigene0010725;Unigene0017613;Unigene0018646;Unigene0035909;Unigene0038206;Unigene0038309;Unigene0041211;Unigene0041857
GO:0010154	fruit development	10	29	0.319768	0.599664	Unigene0002207;Unigene0005594;Unigene0019902;Unigene0022435;Unigene0023428;Unigene0026572;Unigene0030343;Unigene0032988;Unigene0036328;Unigene0036766
GO:0048316	seed development	10	29	0.319768	0.599664	Unigene0002207;Unigene0005594;Unigene0019902;Unigene0022435;Unigene0023428;Unigene0026572;Unigene0030343;Unigene0032988;Unigene0036328;Unigene0036766
GO:0071446	cellular response to salicylic acid stimulus	10	29	0.319768	0.599664	Unigene0009203;Unigene0010384;Unigene0010725;Unigene0017613;Unigene0018646;Unigene0035909;Unigene0038206;Unigene0038309;Unigene0041211;Unigene0041857
GO:0009620	response to fungus	14	42	0.320019	0.599664	Unigene0009203;Unigene0010384;Unigene0011489;Unigene0017613;Unigene0018646;Unigene0020037;Unigene0033821;Unigene0035909;Unigene0037701;Unigene0038206;Unigene0038309;Unigene0039476;Unigene0041211;Unigene0041856
GO:0031050	dsRNA fragmentation	14	42	0.320019	0.599664	Unigene0011489;Unigene0011527;Unigene0013636;Unigene0013811;Unigene0015718;Unigene0022382;Unigene0023647;Unigene0030772;Unigene0033313;Unigene0035006;Unigene0036774;Unigene0037750;Unigene0040086;Unigene0041289
GO:0043331	response to dsRNA	14	42	0.320019	0.599664	Unigene0011489;Unigene0011527;Unigene0013636;Unigene0013811;Unigene0015718;Unigene0022382;Unigene0023647;Unigene0030772;Unigene0033313;Unigene0035006;Unigene0036774;Unigene0037750;Unigene0040086;Unigene0041289
GO:0070918	production of small RNA involved in gene silencing by RNA	14	42	0.320019	0.599664	Unigene0011489;Unigene0011527;Unigene0013636;Unigene0013811;Unigene0015718;Unigene0022382;Unigene0023647;Unigene0030772;Unigene0033313;Unigene0035006;Unigene0036774;Unigene0037750;Unigene0040086;Unigene0041289
GO:0071359	cellular response to dsRNA	14	42	0.320019	0.599664	Unigene0011489;Unigene0011527;Unigene0013636;Unigene0013811;Unigene0015718;Unigene0022382;Unigene0023647;Unigene0030772;Unigene0033313;Unigene0035006;Unigene0036774;Unigene0037750;Unigene0040086;Unigene0041289
GO:1901699	cellular response to nitrogen compound	14	42	0.320019	0.599664	Unigene0011489;Unigene0011527;Unigene0013636;Unigene0013811;Unigene0015718;Unigene0022382;Unigene0023647;Unigene0030772;Unigene0033313;Unigene0035006;Unigene0036774;Unigene0037750;Unigene0040086;Unigene0041289
GO:0032268	regulation of cellular protein metabolic process	42	135	0.323289	0.60223	Unigene0000101;Unigene0000739;Unigene0003800;Unigene0005532;Unigene0006876;Unigene0006998;Unigene0008856;Unigene0009203;Unigene0010153;Unigene0010725;Unigene0011689;Unigene0012975;Unigene0013825;Unigene0014877;Unigene0017346;Unigene0017737;Unigene0018701;Unigene0024575;Unigene0024936;Unigene0025101;Unigene0026085;Unigene0029320;Unigene0033124;Unigene0033206;Unigene0033265;Unigene0033467;Unigene00…
GO:0051246	regulation of protein metabolic process	42	135	0.323289	0.60223	Unigene0000101;Unigene0000739;Unigene0003800;Unigene0005532;Unigene0006876;Unigene0006998;Unigene0008856;Unigene0009203;Unigene0010153;Unigene0010725;Unigene0011689;Unigene0012975;Unigene0013825;Unigene0014877;Unigene0017346;Unigene0017737;Unigene0018701;Unigene0024575;Unigene0024936;Unigene0025101;Unigene0026085;Unigene0029320;Unigene0033124;Unigene0033206;Unigene0033265;Unigene0033467;Unigene00…
GO:0006549	isoleucine metabolic process	4	10	0.32398	0.60223	Unigene0001587;Unigene0004021;Unigene0012428;Unigene0022572
GO:0009894	regulation of catabolic process	4	10	0.32398	0.60223	Unigene0000054;Unigene0000109;Unigene0008337;Unigene0021430
GO:0032844	regulation of homeostatic process	4	10	0.32398	0.60223	Unigene0024936;Unigene0032074;Unigene0037091;Unigene0037701
GO:0048513	animal organ development	27	85	0.323995	0.60223	Unigene0000079;Unigene0000690;Unigene0000999;Unigene0001824;Unigene0001952;Unigene0002141;Unigene0002332;Unigene0003800;Unigene0005002;Unigene0007317;Unigene0009376;Unigene0011916;Unigene0012461;Unigene0012869;Unigene0013825;Unigene0016772;Unigene0019902;Unigene0022473;Unigene0024936;Unigene0033633;Unigene0034667;Unigene0035412;Unigene0037750;Unigene0038963;Unigene0039668;Unigene0039874;Unigene00…
GO:0012501	programmed cell death	20	62	0.329352	0.60223	Unigene0009203;Unigene0010384;Unigene0010725;Unigene0010796;Unigene0013071;Unigene0017613;Unigene0018646;Unigene0023470;Unigene0025179;Unigene0027576;Unigene0032780;Unigene0033086;Unigene0033979;Unigene0035909;Unigene0038206;Unigene0038309;Unigene0038707;Unigene0039767;Unigene0041211;Unigene0041857
GO:0009653	anatomical structure morphogenesis	74	243	0.329575	0.60223	Unigene0000051;Unigene0000054;Unigene0000079;Unigene0000240;Unigene0000253;Unigene0000338;Unigene0000480;Unigene0000685;Unigene0000690;Unigene0000922;Unigene0000938;Unigene0000999;Unigene0001455;Unigene0001952;Unigene0001953;Unigene0002141;Unigene0002269;Unigene0002332;Unigene0003800;Unigene0004752;Unigene0005002;Unigene0005514;Unigene0005532;Unigene0007216;Unigene0008948;Unigene0009156;Unigene00…
GO:0006560	proline metabolic process	3	7	0.330433	0.60223	Unigene0007998;Unigene0028514;Unigene0041186
GO:0006826	iron ion transport	3	7	0.330433	0.60223	Unigene0006926;Unigene0012001;Unigene0020408
GO:0009086	methionine biosynthetic process	3	7	0.330433	0.60223	Unigene0009495;Unigene0010007;Unigene0014690
GO:0046112	nucleobase biosynthetic process	3	7	0.330433	0.60223	Unigene0004445;Unigene0014645;Unigene0025866
GO:0065002	intracellular protein transmembrane transport	3	7	0.330433	0.60223	Unigene0028828;Unigene0036294;Unigene0041411
GO:0071265	L-methionine biosynthetic process	3	7	0.330433	0.60223	Unigene0009495;Unigene0010007;Unigene0014690
GO:0071806	protein transmembrane transport	3	7	0.330433	0.60223	Unigene0028828;Unigene0036294;Unigene0041411
GO:0006029	proteoglycan metabolic process	2	4	0.330778	0.60223	Unigene0031868;Unigene0039851
GO:0006084	acetyl-CoA metabolic process	2	4	0.330778	0.60223	Unigene0037699;Unigene0040457
GO:0006772	thiamine metabolic process	2	4	0.330778	0.60223	Unigene0004052;Unigene0038167
GO:0009765	photosynthesis, light harvesting	2	4	0.330778	0.60223	Unigene0027678;Unigene0039022
GO:0010073	meristem maintenance	2	4	0.330778	0.60223	Unigene0011100;Unigene0024936
GO:0043484	regulation of RNA splicing	2	4	0.330778	0.60223	Unigene0010818;Unigene0026644
GO:0090529	cell septum assembly	2	4	0.330778	0.60223	Unigene0011541;Unigene0012117
GO:0050789	regulation of biological process	459	1557	0.332418	0.604435	Unigene0000048;Unigene0000051;Unigene0000054;Unigene0000060;Unigene0000079;Unigene0000101;Unigene0000109;Unigene0000144;Unigene0000163;Unigene0000180;Unigene0000262;Unigene0000271;Unigene0000282;Unigene0000284;Unigene0000338;Unigene0000341;Unigene0000454;Unigene0000480;Unigene0000494;Unigene0000578;Unigene0000677;Unigene0000689;Unigene0000690;Unigene0000695;Unigene0000739;Unigene0000774;Unigene00…
GO:0010605	negative regulation of macromolecule metabolic process	46	149	0.335015	0.608373	Unigene0000079;Unigene0000262;Unigene0000480;Unigene0000695;Unigene0000999;Unigene0002332;Unigene0006324;Unigene0010296;Unigene0010725;Unigene0011489;Unigene0011527;Unigene0011916;Unigene0012431;Unigene0013636;Unigene0013811;Unigene0014931;Unigene0015718;Unigene0016046;Unigene0016772;Unigene0022382;Unigene0022473;Unigene0023647;Unigene0024137;Unigene0024936;Unigene0025428;Unigene0026572;Unigene00…
GO:0040008	regulation of growth	8	23	0.341639	0.61881	Unigene0000054;Unigene0005002;Unigene0011916;Unigene0014650;Unigene0024936;Unigene0032769;Unigene0037091;Unigene0040676
GO:0043647	inositol phosphate metabolic process	8	23	0.341639	0.61881	Unigene0002190;Unigene0011679;Unigene0018115;Unigene0019712;Unigene0024623;Unigene0028456;Unigene0036766;Unigene0040519
GO:0071310	cellular response to organic substance	74	244	0.344961	0.624026	Unigene0000051;Unigene0001824;Unigene0001952;Unigene0002207;Unigene0002448;Unigene0002625;Unigene0002943;Unigene0003577;Unigene0005500;Unigene0008112;Unigene0009203;Unigene0009348;Unigene0010384;Unigene0010725;Unigene0010952;Unigene0010953;Unigene0011489;Unigene0011527;Unigene0011986;Unigene0013636;Unigene0013811;Unigene0015718;Unigene0015770;Unigene0016944;Unigene0017003;Unigene0017613;Unigene00…
GO:0001932	regulation of protein phosphorylation	15	46	0.345995	0.624295	Unigene0000101;Unigene0000739;Unigene0005532;Unigene0008856;Unigene0009203;Unigene0011689;Unigene0014877;Unigene0017346;Unigene0033265;Unigene0037077;Unigene0037777;Unigene0038017;Unigene0040743;Unigene0041247;Unigene0041670
GO:0042325	regulation of phosphorylation	15	46	0.345995	0.624295	Unigene0000101;Unigene0000739;Unigene0005532;Unigene0008856;Unigene0009203;Unigene0011689;Unigene0014877;Unigene0017346;Unigene0033265;Unigene0037077;Unigene0037777;Unigene0038017;Unigene0040743;Unigene0041247;Unigene0041670
GO:0010035	response to inorganic substance	21	66	0.349952	0.630628	Unigene0000341;Unigene0001783;Unigene0004125;Unigene0009348;Unigene0011417;Unigene0011776;Unigene0012617;Unigene0012835;Unigene0013071;Unigene0016944;Unigene0017346;Unigene0018646;Unigene0021043;Unigene0024793;Unigene0027650;Unigene0033470;Unigene0034248;Unigene0034431;Unigene0035056;Unigene0036106;Unigene0037557
GO:0000375	RNA splicing, via transesterification reactions	7	20	0.35406	0.635597	Unigene0007400;Unigene0009740;Unigene0010818;Unigene0016952;Unigene0023647;Unigene0026644;Unigene0034255
GO:0000377	RNA splicing, via transesterification reactions with bulged adenosine as nucleophile	7	20	0.35406	0.635597	Unigene0007400;Unigene0009740;Unigene0010818;Unigene0016952;Unigene0023647;Unigene0026644;Unigene0034255
GO:0032392	DNA geometric change	7	20	0.35406	0.635597	Unigene0003756;Unigene0020948;Unigene0023579;Unigene0034456;Unigene0035514;Unigene0035522;Unigene0039274
GO:0009892	negative regulation of metabolic process	56	184	0.359467	0.644483	Unigene0000079;Unigene0000262;Unigene0000480;Unigene0000695;Unigene0000999;Unigene0002332;Unigene0005718;Unigene0006324;Unigene0010296;Unigene0010725;Unigene0011489;Unigene0011527;Unigene0011916;Unigene0012431;Unigene0013636;Unigene0013811;Unigene0014931;Unigene0014934;Unigene0015718;Unigene0016046;Unigene0016772;Unigene0020699;Unigene0022382;Unigene0022473;Unigene0023647;Unigene0024137;Unigene00…
GO:0070887	cellular response to chemical stimulus	74	245	0.360558	0.644694	Unigene0000051;Unigene0001824;Unigene0001952;Unigene0002207;Unigene0002448;Unigene0002625;Unigene0002943;Unigene0003577;Unigene0005500;Unigene0008112;Unigene0009203;Unigene0009348;Unigene0010384;Unigene0010725;Unigene0010952;Unigene0010953;Unigene0011489;Unigene0011527;Unigene0011986;Unigene0013636;Unigene0013811;Unigene0015718;Unigene0015770;Unigene0016944;Unigene0017003;Unigene0017613;Unigene00…
GO:0006325	chromatin organization	66	218	0.362306	0.644694	Unigene0000079;Unigene0000660;Unigene0000690;Unigene0000695;Unigene0000774;Unigene0000938;Unigene0001284;Unigene0002141;Unigene0002272;Unigene0002304;Unigene0002332;Unigene0004300;Unigene0004712;Unigene0007820;Unigene0007955;Unigene0008176;Unigene0010051;Unigene0010611;Unigene0011387;Unigene0011489;Unigene0011916;Unigene0012431;Unigene0014931;Unigene0015353;Unigene0016772;Unigene0019537;Unigene00…
GO:0009267	cellular response to starvation	10	30	0.364501	0.644694	Unigene0000051;Unigene0007282;Unigene0009348;Unigene0011417;Unigene0021235;Unigene0025775;Unigene0034431;Unigene0034500;Unigene0035914;Unigene0040743
GO:0010053	root epidermal cell differentiation	10	30	0.364501	0.644694	Unigene0000054;Unigene0000922;Unigene0001455;Unigene0011916;Unigene0017529;Unigene0021825;Unigene0024936;Unigene0033910;Unigene0038166;Unigene0041247
GO:0031667	response to nutrient levels	10	30	0.364501	0.644694	Unigene0000051;Unigene0007282;Unigene0009348;Unigene0011417;Unigene0021235;Unigene0025775;Unigene0034431;Unigene0034500;Unigene0035914;Unigene0040743
GO:0031669	cellular response to nutrient levels	10	30	0.364501	0.644694	Unigene0000051;Unigene0007282;Unigene0009348;Unigene0011417;Unigene0021235;Unigene0025775;Unigene0034431;Unigene0034500;Unigene0035914;Unigene0040743
GO:0042594	response to starvation	10	30	0.364501	0.644694	Unigene0000051;Unigene0007282;Unigene0009348;Unigene0011417;Unigene0021235;Unigene0025775;Unigene0034431;Unigene0034500;Unigene0035914;Unigene0040743
GO:0090627	plant epidermal cell differentiation	10	30	0.364501	0.644694	Unigene0000054;Unigene0000922;Unigene0001455;Unigene0011916;Unigene0017529;Unigene0021825;Unigene0024936;Unigene0033910;Unigene0038166;Unigene0041247
GO:0048580	regulation of post-embryonic development	28	90	0.366882	0.644694	Unigene0000999;Unigene0001824;Unigene0002141;Unigene0002207;Unigene0005594;Unigene0008378;Unigene0011387;Unigene0011916;Unigene0012431;Unigene0015770;Unigene0019537;Unigene0022435;Unigene0022473;Unigene0023428;Unigene0023647;Unigene0023749;Unigene0024936;Unigene0027212;Unigene0030343;Unigene0031751;Unigene0033190;Unigene0033594;Unigene0033821;Unigene0033958;Unigene0034255;Unigene0037701;Unigene00…
GO:0001510	RNA methylation	6	17	0.367809	0.644694	Unigene0002808;Unigene0010986;Unigene0014337;Unigene0016201;Unigene0033968;Unigene0036849
GO:0006364	rRNA processing	6	17	0.367809	0.644694	Unigene0000054;Unigene0026253;Unigene0033909;Unigene0034230;Unigene0037966;Unigene0038338
GO:0006754	ATP biosynthetic process	6	17	0.367809	0.644694	Unigene0014153;Unigene0024361;Unigene0027249;Unigene0034626;Unigene0038309;Unigene0039874
GO:0009144	purine nucleoside triphosphate metabolic process	6	17	0.367809	0.644694	Unigene0014153;Unigene0024361;Unigene0027249;Unigene0034626;Unigene0038309;Unigene0039874
GO:0009145	purine nucleoside triphosphate biosynthetic process	6	17	0.367809	0.644694	Unigene0014153;Unigene0024361;Unigene0027249;Unigene0034626;Unigene0038309;Unigene0039874
GO:0009205	purine ribonucleoside triphosphate metabolic process	6	17	0.367809	0.644694	Unigene0014153;Unigene0024361;Unigene0027249;Unigene0034626;Unigene0038309;Unigene0039874
GO:0009206	purine ribonucleoside triphosphate biosynthetic process	6	17	0.367809	0.644694	Unigene0014153;Unigene0024361;Unigene0027249;Unigene0034626;Unigene0038309;Unigene0039874
GO:0042254	ribosome biogenesis	6	17	0.367809	0.644694	Unigene0000054;Unigene0026253;Unigene0033909;Unigene0034230;Unigene0037966;Unigene0038338
GO:0046034	ATP metabolic process	6	17	0.367809	0.644694	Unigene0014153;Unigene0024361;Unigene0027249;Unigene0034626;Unigene0038309;Unigene0039874
GO:0048468	cell development	25	80	0.368449	0.645015	Unigene0000054;Unigene0000253;Unigene0000863;Unigene0000922;Unigene0001344;Unigene0001953;Unigene0007216;Unigene0011916;Unigene0012835;Unigene0017529;Unigene0017966;Unigene0024936;Unigene0026071;Unigene0027326;Unigene0032340;Unigene0033594;Unigene0033910;Unigene0035478;Unigene0036095;Unigene0037441;Unigene0037533;Unigene0038166;Unigene0039767;Unigene0041247;Unigene0041963
GO:0003002	regionalization	16	50	0.37031	0.647469	Unigene0000480;Unigene0000690;Unigene0000999;Unigene0001952;Unigene0002269;Unigene0002625;Unigene0005086;Unigene0009203;Unigene0011534;Unigene0013636;Unigene0019902;Unigene0024936;Unigene0027144;Unigene0039263;Unigene0040128;Unigene0041289
GO:0050794	regulation of cellular process	286	970	0.3753	0.655382	Unigene0000048;Unigene0000051;Unigene0000054;Unigene0000079;Unigene0000101;Unigene0000180;Unigene0000271;Unigene0000282;Unigene0000338;Unigene0000341;Unigene0000454;Unigene0000480;Unigene0000494;Unigene0000677;Unigene0000695;Unigene0000739;Unigene0000783;Unigene0000859;Unigene0000922;Unigene0000997;Unigene0001005;Unigene0001320;Unigene0001824;Unigene0001952;Unigene0001953;Unigene0002066;Unigene00…
GO:0006913	nucleocytoplasmic transport	9	27	0.377998	0.657652	Unigene0000473;Unigene0000999;Unigene0020251;Unigene0021468;Unigene0024936;Unigene0027684;Unigene0029284;Unigene0035357;Unigene0040969
GO:0022610	biological adhesion	9	27	0.377998	0.657652	Unigene0000054;Unigene0000922;Unigene0011916;Unigene0017529;Unigene0024227;Unigene0024936;Unigene0033910;Unigene0038166;Unigene0041247
GO:0051169	nuclear transport	9	27	0.377998	0.657652	Unigene0000473;Unigene0000999;Unigene0020251;Unigene0021468;Unigene0024936;Unigene0027684;Unigene0029284;Unigene0035357;Unigene0040969
GO:0046165	alcohol biosynthetic process	12	37	0.381403	0.659563	Unigene0000248;Unigene0002190;Unigene0007164;Unigene0010296;Unigene0011679;Unigene0017984;Unigene0020277;Unigene0024623;Unigene0028456;Unigene0033591;Unigene0036766;Unigene0039664
GO:0009259	ribonucleotide metabolic process	18	57	0.38146	0.659563	Unigene0002207;Unigene0003687;Unigene0004445;Unigene0014153;Unigene0014645;Unigene0022679;Unigene0024361;Unigene0025866;Unigene0027249;Unigene0028105;Unigene0034015;Unigene0034626;Unigene0035073;Unigene0038006;Unigene0038309;Unigene0039874;Unigene0040377;Unigene0041484
GO:0009260	ribonucleotide biosynthetic process	18	57	0.38146	0.659563	Unigene0002207;Unigene0003687;Unigene0004445;Unigene0014153;Unigene0014645;Unigene0022679;Unigene0024361;Unigene0025866;Unigene0027249;Unigene0028105;Unigene0034015;Unigene0034626;Unigene0035073;Unigene0038006;Unigene0038309;Unigene0039874;Unigene0040377;Unigene0041484
GO:0046390	ribose phosphate biosynthetic process	18	57	0.38146	0.659563	Unigene0002207;Unigene0003687;Unigene0004445;Unigene0014153;Unigene0014645;Unigene0022679;Unigene0024361;Unigene0025866;Unigene0027249;Unigene0028105;Unigene0034015;Unigene0034626;Unigene0035073;Unigene0038006;Unigene0038309;Unigene0039874;Unigene0040377;Unigene0041484
GO:0048285	organelle fission	18	57	0.38146	0.659563	Unigene0000238;Unigene0000454;Unigene0000677;Unigene0005002;Unigene0011301;Unigene0013182;Unigene0016772;Unigene0020441;Unigene0022473;Unigene0023311;Unigene0024936;Unigene0032074;Unigene0032769;Unigene0034584;Unigene0034666;Unigene0037081;Unigene0037091;Unigene0037701
GO:0006643	membrane lipid metabolic process	15	47	0.382096	0.659563	Unigene0009348;Unigene0011417;Unigene0011679;Unigene0020344;Unigene0021235;Unigene0027326;Unigene0031818;Unigene0032709;Unigene0034431;Unigene0035179;Unigene0035914;Unigene0037689;Unigene0038166;Unigene0039477;Unigene0039731
GO:0009129	pyrimidine nucleoside monophosphate metabolic process	5	14	0.383304	0.659563	Unigene0004445;Unigene0014645;Unigene0025866;Unigene0033872;Unigene0038006
GO:0009130	pyrimidine nucleoside monophosphate biosynthetic process	5	14	0.383304	0.659563	Unigene0004445;Unigene0014645;Unigene0025866;Unigene0033872;Unigene0038006
GO:0009225	nucleotide-sugar metabolic process	5	14	0.383304	0.659563	Unigene0000138;Unigene0002944;Unigene0003317;Unigene0038090;Unigene0038790
GO:0006566	threonine metabolic process	4	11	0.401236	0.687068	Unigene0004021;Unigene0007998;Unigene0034901;Unigene0036189
GO:0010051	xylem and phloem pattern formation	4	11	0.401236	0.687068	Unigene0000480;Unigene0001952;Unigene0013636;Unigene0024936
GO:0051258	protein polymerization	4	11	0.401236	0.687068	Unigene0014407;Unigene0026263;Unigene0035478;Unigene0039742
GO:0051493	regulation of cytoskeleton organization	4	11	0.401236	0.687068	Unigene0014407;Unigene0023388;Unigene0026263;Unigene0035478
GO:0048229	gametophyte development	19	61	0.402497	0.688392	Unigene0000230;Unigene0002141;Unigene0005514;Unigene0010746;Unigene0011916;Unigene0014697;Unigene0018085;Unigene0021833;Unigene0022940;Unigene0023388;Unigene0024579;Unigene0025487;Unigene0026572;Unigene0033594;Unigene0034399;Unigene0034500;Unigene0036141;Unigene0037471;Unigene0040128
GO:0048507	meristem development	37	122	0.406382	0.693555	Unigene0000051;Unigene0000240;Unigene0000480;Unigene0000685;Unigene0000922;Unigene0001952;Unigene0002207;Unigene0002269;Unigene0004483;Unigene0004752;Unigene0005532;Unigene0007164;Unigene0010192;Unigene0011100;Unigene0011489;Unigene0011534;Unigene0015770;Unigene0017090;Unigene0017529;Unigene0019902;Unigene0020233;Unigene0022435;Unigene0023428;Unigene0023647;Unigene0024936;Unigene0025179;Unigene00…
GO:0006261	DNA-dependent DNA replication	7	21	0.409448	0.693555	Unigene0005002;Unigene0011916;Unigene0017346;Unigene0032769;Unigene0037091;Unigene0040676;Unigene0041963
GO:0006403	RNA localization	7	21	0.409448	0.693555	Unigene0000999;Unigene0020251;Unigene0021468;Unigene0024936;Unigene0029284;Unigene0034255;Unigene0040969
GO:0006637	acyl-CoA metabolic process	7	21	0.409448	0.693555	Unigene0000248;Unigene0004237;Unigene0007164;Unigene0010296;Unigene0020277;Unigene0037699;Unigene0040457
GO:0035383	thioester metabolic process	7	21	0.409448	0.693555	Unigene0000248;Unigene0004237;Unigene0007164;Unigene0010296;Unigene0020277;Unigene0037699;Unigene0040457
GO:0050657	nucleic acid transport	7	21	0.409448	0.693555	Unigene0000999;Unigene0020251;Unigene0021468;Unigene0024936;Unigene0029284;Unigene0034255;Unigene0040969
GO:0050658	RNA transport	7	21	0.409448	0.693555	Unigene0000999;Unigene0020251;Unigene0021468;Unigene0024936;Unigene0029284;Unigene0034255;Unigene0040969
GO:0051236	establishment of RNA localization	7	21	0.409448	0.693555	Unigene0000999;Unigene0020251;Unigene0021468;Unigene0024936;Unigene0029284;Unigene0034255;Unigene0040969
GO:0019693	ribose phosphate metabolic process	18	58	0.414587	0.701417	Unigene0002207;Unigene0003687;Unigene0004445;Unigene0014153;Unigene0014645;Unigene0022679;Unigene0024361;Unigene0025866;Unigene0027249;Unigene0028105;Unigene0034015;Unigene0034626;Unigene0035073;Unigene0038006;Unigene0038309;Unigene0039874;Unigene0040377;Unigene0041484
GO:0048519	negative regulation of biological process	60	201	0.421119	0.704723	Unigene0000079;Unigene0000262;Unigene0000480;Unigene0000695;Unigene0000999;Unigene0002332;Unigene0005718;Unigene0006324;Unigene0010296;Unigene0010725;Unigene0011489;Unigene0011527;Unigene0011916;Unigene0012431;Unigene0013636;Unigene0013811;Unigene0014931;Unigene0014934;Unigene0015718;Unigene0016046;Unigene0016772;Unigene0020699;Unigene0022382;Unigene0022473;Unigene0023647;Unigene0024137;Unigene00…
GO:0010467	gene expression	409	1398	0.421135	0.704723	Unigene0000051;Unigene0000054;Unigene0000079;Unigene0000144;Unigene0000145;Unigene0000150;Unigene0000160;Unigene0000163;Unigene0000180;Unigene0000262;Unigene0000282;Unigene0000341;Unigene0000454;Unigene0000480;Unigene0000494;Unigene0000545;Unigene0000689;Unigene0000690;Unigene0000695;Unigene0000773;Unigene0000774;Unigene0000859;Unigene0000922;Unigene0000997;Unigene0000999;Unigene0001005;Unigene00…
GO:0010015	root morphogenesis	12	38	0.422571	0.704723	Unigene0000051;Unigene0000054;Unigene0000922;Unigene0001455;Unigene0011916;Unigene0017529;Unigene0021825;Unigene0024936;Unigene0033910;Unigene0037533;Unigene0038166;Unigene0041247
GO:0006573	valine metabolic process	3	8	0.422899	0.704723	Unigene0012428;Unigene0022572;Unigene0029579
GO:0006596	polyamine biosynthetic process	3	8	0.422899	0.704723	Unigene0006075;Unigene0006876;Unigene0023482
GO:0008272	sulfate transport	3	8	0.422899	0.704723	Unigene0025994;Unigene0036880;Unigene0041640
GO:0009309	amine biosynthetic process	3	8	0.422899	0.704723	Unigene0006075;Unigene0006876;Unigene0023482
GO:0009687	abscisic acid metabolic process	3	8	0.422899	0.704723	Unigene0028369;Unigene0036438;Unigene0037319
GO:0042401	cellular biogenic amine biosynthetic process	3	8	0.422899	0.704723	Unigene0006075;Unigene0006876;Unigene0023482
GO:0043288	apocarotenoid metabolic process	3	8	0.422899	0.704723	Unigene0028369;Unigene0036438;Unigene0037319
GO:0072348	sulfur compound transport	3	8	0.422899	0.704723	Unigene0025994;Unigene0036880;Unigene0041640
GO:1902644	tertiary alcohol metabolic process	3	8	0.422899	0.704723	Unigene0028369;Unigene0036438;Unigene0037319
GO:0009888	tissue development	50	167	0.423033	0.704723	Unigene0000051;Unigene0000054;Unigene0000240;Unigene0000480;Unigene0000685;Unigene0000922;Unigene0001455;Unigene0001952;Unigene0002207;Unigene0002269;Unigene0004483;Unigene0004752;Unigene0005532;Unigene0007164;Unigene0007820;Unigene0009203;Unigene0010192;Unigene0011100;Unigene0011489;Unigene0011534;Unigene0011916;Unigene0015749;Unigene0015770;Unigene0017090;Unigene0017346;Unigene0017529;Unigene00…
GO:0018193	peptidyl-amino acid modification	30	99	0.424791	0.706816	Unigene0000660;Unigene0000695;Unigene0000938;Unigene0001518;Unigene0002332;Unigene0009707;Unigene0011916;Unigene0012431;Unigene0016772;Unigene0017529;Unigene0018725;Unigene0019537;Unigene0019902;Unigene0021984;Unigene0022473;Unigene0023282;Unigene0024936;Unigene0025487;Unigene0032709;Unigene0033190;Unigene0033633;Unigene0034255;Unigene0035412;Unigene0035514;Unigene0037826;Unigene0038006;Unigene00…
GO:0006405	RNA export from nucleus	6	18	0.428286	0.71012	Unigene0000999;Unigene0020251;Unigene0021468;Unigene0024936;Unigene0029284;Unigene0040969
GO:0006665	sphingolipid metabolic process	6	18	0.428286	0.71012	Unigene0020344;Unigene0027326;Unigene0032709;Unigene0035179;Unigene0039477;Unigene0039731
GO:0051168	nuclear export	6	18	0.428286	0.71012	Unigene0000999;Unigene0020251;Unigene0021468;Unigene0024936;Unigene0029284;Unigene0040969
GO:0034220	ion transmembrane transport	22	72	0.42928	0.710932	Unigene0001953;Unigene0003668;Unigene0008948;Unigene0014153;Unigene0015332;Unigene0016646;Unigene0016944;Unigene0017400;Unigene0018036;Unigene0019339;Unigene0027249;Unigene0030470;Unigene0032780;Unigene0034431;Unigene0035528;Unigene0035596;Unigene0038095;Unigene0038751;Unigene0039625;Unigene0040141;Unigene0041834;Unigene0041926
GO:0016568	chromatin modification	49	164	0.431174	0.713232	Unigene0000079;Unigene0000660;Unigene0000690;Unigene0000695;Unigene0000774;Unigene0000938;Unigene0001284;Unigene0002272;Unigene0002332;Unigene0004300;Unigene0007955;Unigene0008176;Unigene0010051;Unigene0010611;Unigene0011387;Unigene0011489;Unigene0011916;Unigene0012431;Unigene0015353;Unigene0016772;Unigene0019537;Unigene0021984;Unigene0022473;Unigene0023282;Unigene0023647;Unigene0024936;Unigene00…
GO:0048589	developmental growth	11	35	0.438226	0.719422	Unigene0000240;Unigene0000863;Unigene0008948;Unigene0017966;Unigene0024936;Unigene0026071;Unigene0033594;Unigene0033910;Unigene0036095;Unigene0037441;Unigene0037533
GO:0006970	response to osmotic stress	36	120	0.438748	0.719422	Unigene0000341;Unigene0000474;Unigene0002211;Unigene0002943;Unigene0007090;Unigene0008731;Unigene0009348;Unigene0012835;Unigene0013071;Unigene0014429;Unigene0016944;Unigene0018036;Unigene0018646;Unigene0021825;Unigene0022572;Unigene0022814;Unigene0026071;Unigene0028965;Unigene0031972;Unigene0033086;Unigene0033384;Unigene0033633;Unigene0033677;Unigene0033979;Unigene0034248;Unigene0035056;Unigene00…
GO:0009247	glycolipid biosynthetic process	8	25	0.444211	0.719422	Unigene0009348;Unigene0011417;Unigene0011679;Unigene0021235;Unigene0031818;Unigene0034431;Unigene0035914;Unigene0038166
GO:0007015	actin filament organization	13	42	0.447592	0.719422	Unigene0000054;Unigene0000253;Unigene0000922;Unigene0010843;Unigene0011916;Unigene0014407;Unigene0017529;Unigene0024936;Unigene0026263;Unigene0033910;Unigene0035478;Unigene0038166;Unigene0041247
GO:0009150	purine ribonucleotide metabolic process	13	42	0.447592	0.719422	Unigene0002207;Unigene0003687;Unigene0014153;Unigene0022679;Unigene0024361;Unigene0027249;Unigene0028105;Unigene0034015;Unigene0034626;Unigene0035073;Unigene0038309;Unigene0039874;Unigene0041484
GO:0009152	purine ribonucleotide biosynthetic process	13	42	0.447592	0.719422	Unigene0002207;Unigene0003687;Unigene0014153;Unigene0022679;Unigene0024361;Unigene0027249;Unigene0028105;Unigene0034015;Unigene0034626;Unigene0035073;Unigene0038309;Unigene0039874;Unigene0041484
GO:0009308	amine metabolic process	13	42	0.447592	0.719422	Unigene0006075;Unigene0006876;Unigene0007358;Unigene0007818;Unigene0008854;Unigene0010189;Unigene0013506;Unigene0017613;Unigene0023482;Unigene0026341;Unigene0033030;Unigene0033591;Unigene0041182
GO:0043549	regulation of kinase activity	13	42	0.447592	0.719422	Unigene0000101;Unigene0000739;Unigene0005532;Unigene0008856;Unigene0009203;Unigene0011689;Unigene0014877;Unigene0017346;Unigene0033265;Unigene0037777;Unigene0038017;Unigene0041247;Unigene0041670
GO:0045859	regulation of protein kinase activity	13	42	0.447592	0.719422	Unigene0000101;Unigene0000739;Unigene0005532;Unigene0008856;Unigene0009203;Unigene0011689;Unigene0014877;Unigene0017346;Unigene0033265;Unigene0037777;Unigene0038017;Unigene0041247;Unigene0041670
GO:0051338	regulation of transferase activity	13	42	0.447592	0.719422	Unigene0000101;Unigene0000739;Unigene0005532;Unigene0008856;Unigene0009203;Unigene0011689;Unigene0014877;Unigene0017346;Unigene0033265;Unigene0037777;Unigene0038017;Unigene0041247;Unigene0041670
GO:0002252	immune effector process	5	15	0.450212	0.719422	Unigene0011527;Unigene0013636;Unigene0015718;Unigene0023647;Unigene0035909
GO:0008037	cell recognition	5	15	0.450212	0.719422	Unigene0000099;Unigene0011527;Unigene0034323;Unigene0036109;Unigene0042064
GO:0009692	ethylene metabolic process	5	15	0.450212	0.719422	Unigene0001953;Unigene0002806;Unigene0018567;Unigene0031926;Unigene0039767
GO:0043449	cellular alkene metabolic process	5	15	0.450212	0.719422	Unigene0001953;Unigene0002806;Unigene0018567;Unigene0031926;Unigene0039767
GO:1900673	olefin metabolic process	5	15	0.450212	0.719422	Unigene0001953;Unigene0002806;Unigene0018567;Unigene0031926;Unigene0039767
GO:0006109	regulation of carbohydrate metabolic process	2	5	0.451232	0.719422	Unigene0036106;Unigene0036766
GO:0006144	purine nucleobase metabolic process	2	5	0.451232	0.719422	Unigene0003687;Unigene0039145
GO:0006400	tRNA modification	2	5	0.451232	0.719422	Unigene0022213;Unigene0026887
GO:0006900	membrane budding	2	5	0.451232	0.719422	Unigene0014058;Unigene0034745
GO:0006901	vesicle coating	2	5	0.451232	0.719422	Unigene0014058;Unigene0034745
GO:0009084	glutamine family amino acid biosynthetic process	2	5	0.451232	0.719422	Unigene0007998;Unigene0041186
GO:0009593	detection of chemical stimulus	2	5	0.451232	0.719422	Unigene0002211;Unigene0033594
GO:0009608	response to symbiont	2	5	0.451232	0.719422	Unigene0001696;Unigene0005477
GO:0009832	plant-type cell wall biogenesis	2	5	0.451232	0.719422	Unigene0005067;Unigene0009707
GO:0015994	chlorophyll metabolic process	2	5	0.451232	0.719422	Unigene0020845;Unigene0036106
GO:0031023	microtubule organizing center organization	2	5	0.451232	0.719422	Unigene0017685;Unigene0018898
GO:0031124	mRNA 3'-end processing	2	5	0.451232	0.719422	Unigene0009615;Unigene0023127
GO:0035434	copper ion transmembrane transport	2	5	0.451232	0.719422	Unigene0035528;Unigene0039625
GO:0043102	amino acid salvage	2	5	0.451232	0.719422	Unigene0009495;Unigene0014690
GO:0044743	intracellular protein transmembrane import	2	5	0.451232	0.719422	Unigene0036294;Unigene0041411
GO:0071267	L-methionine salvage	2	5	0.451232	0.719422	Unigene0009495;Unigene0014690
GO:1990066	energy quenching	2	5	0.451232	0.719422	Unigene0033754;Unigene0039057
GO:0055085	transmembrane transport	25	83	0.45223	0.720199	Unigene0001953;Unigene0003668;Unigene0008948;Unigene0014153;Unigene0015332;Unigene0016646;Unigene0016944;Unigene0017400;Unigene0018036;Unigene0019339;Unigene0027249;Unigene0028828;Unigene0030470;Unigene0032780;Unigene0034431;Unigene0035528;Unigene0035596;Unigene0036294;Unigene0038095;Unigene0038751;Unigene0039625;Unigene0040141;Unigene0041411;Unigene0041834;Unigene0041926
GO:0009991	response to extracellular stimulus	10	32	0.455286	0.722619	Unigene0000051;Unigene0007282;Unigene0009348;Unigene0011417;Unigene0021235;Unigene0025775;Unigene0034431;Unigene0034500;Unigene0035914;Unigene0040743
GO:0031668	cellular response to extracellular stimulus	10	32	0.455286	0.722619	Unigene0000051;Unigene0007282;Unigene0009348;Unigene0011417;Unigene0021235;Unigene0025775;Unigene0034431;Unigene0034500;Unigene0035914;Unigene0040743
GO:0071496	cellular response to external stimulus	10	32	0.455286	0.722619	Unigene0000051;Unigene0007282;Unigene0009348;Unigene0011417;Unigene0021235;Unigene0025775;Unigene0034431;Unigene0034500;Unigene0035914;Unigene0040743
GO:0009814	defense response, incompatible interaction	7	22	0.464509	0.725987	Unigene0004223;Unigene0008614;Unigene0015492;Unigene0017354;Unigene0017613;Unigene0025775;Unigene0041211
GO:0065007	biological regulation	498	1712	0.476539	0.725987	Unigene0000048;Unigene0000051;Unigene0000054;Unigene0000060;Unigene0000079;Unigene0000101;Unigene0000109;Unigene0000144;Unigene0000163;Unigene0000180;Unigene0000262;Unigene0000271;Unigene0000282;Unigene0000284;Unigene0000338;Unigene0000341;Unigene0000454;Unigene0000480;Unigene0000494;Unigene0000578;Unigene0000677;Unigene0000685;Unigene0000689;Unigene0000690;Unigene0000695;Unigene0000739;Unigene00…
GO:0006222	UMP biosynthetic process	4	12	0.476663	0.725987	Unigene0004445;Unigene0014645;Unigene0025866;Unigene0038006
GO:0046049	UMP metabolic process	4	12	0.476663	0.725987	Unigene0004445;Unigene0014645;Unigene0025866;Unigene0038006
GO:0006164	purine nucleotide biosynthetic process	13	43	0.486845	0.725987	Unigene0002207;Unigene0003687;Unigene0014153;Unigene0022679;Unigene0024361;Unigene0027249;Unigene0028105;Unigene0034015;Unigene0034626;Unigene0035073;Unigene0038309;Unigene0039874;Unigene0041484
GO:0044036	cell wall macromolecule metabolic process	15	50	0.491599	0.725987	Unigene0000454;Unigene0001518;Unigene0005067;Unigene0006075;Unigene0015485;Unigene0018916;Unigene0020513;Unigene0024137;Unigene0027625;Unigene0032709;Unigene0033617;Unigene0034500;Unigene0034857;Unigene0036933;Unigene0037091
GO:0009755	hormone-mediated signaling pathway	51	174	0.493367	0.725987	Unigene0000051;Unigene0001824;Unigene0001952;Unigene0002448;Unigene0002625;Unigene0002943;Unigene0003577;Unigene0005500;Unigene0009203;Unigene0009348;Unigene0010384;Unigene0010725;Unigene0010952;Unigene0010953;Unigene0011986;Unigene0016944;Unigene0017003;Unigene0017613;Unigene0018646;Unigene0019902;Unigene0023428;Unigene0023546;Unigene0024793;Unigene0033086;Unigene0033176;Unigene0033594;Unigene00…
GO:0032870	cellular response to hormone stimulus	51	174	0.493367	0.725987	Unigene0000051;Unigene0001824;Unigene0001952;Unigene0002448;Unigene0002625;Unigene0002943;Unigene0003577;Unigene0005500;Unigene0009203;Unigene0009348;Unigene0010384;Unigene0010725;Unigene0010952;Unigene0010953;Unigene0011986;Unigene0016944;Unigene0017003;Unigene0017613;Unigene0018646;Unigene0019902;Unigene0023428;Unigene0023546;Unigene0024793;Unigene0033086;Unigene0033176;Unigene0033594;Unigene00…
GO:0071495	cellular response to endogenous stimulus	51	174	0.493367	0.725987	Unigene0000051;Unigene0001824;Unigene0001952;Unigene0002448;Unigene0002625;Unigene0002943;Unigene0003577;Unigene0005500;Unigene0009203;Unigene0009348;Unigene0010384;Unigene0010725;Unigene0010952;Unigene0010953;Unigene0011986;Unigene0016944;Unigene0017003;Unigene0017613;Unigene0018646;Unigene0019902;Unigene0023428;Unigene0023546;Unigene0024793;Unigene0033086;Unigene0033176;Unigene0033594;Unigene00…
GO:0065008	regulation of biological quality	71	243	0.495205	0.725987	Unigene0000048;Unigene0000051;Unigene0000341;Unigene0000454;Unigene0000677;Unigene0000685;Unigene0001733;Unigene0001952;Unigene0002207;Unigene0002211;Unigene0005192;Unigene0005594;Unigene0007358;Unigene0007645;Unigene0007818;Unigene0009534;Unigene0010189;Unigene0010514;Unigene0012001;Unigene0012617;Unigene0012835;Unigene0013071;Unigene0013506;Unigene0014407;Unigene0014429;Unigene0014540;Unigene00…
GO:0006260	DNA replication	17	57	0.495694	0.725987	Unigene0000079;Unigene0002783;Unigene0005002;Unigene0011916;Unigene0012431;Unigene0012869;Unigene0014704;Unigene0014890;Unigene0016772;Unigene0017346;Unigene0017826;Unigene0023497;Unigene0026572;Unigene0032769;Unigene0037091;Unigene0040676;Unigene0041963
GO:1901698	response to nitrogen compound	26	88	0.495807	0.725987	Unigene0010189;Unigene0010384;Unigene0011489;Unigene0011527;Unigene0013636;Unigene0013729;Unigene0013811;Unigene0015718;Unigene0015731;Unigene0017613;Unigene0018646;Unigene0022382;Unigene0023647;Unigene0030772;Unigene0033086;Unigene0033313;Unigene0035006;Unigene0035060;Unigene0035909;Unigene0036774;Unigene0037750;Unigene0038309;Unigene0038945;Unigene0040086;Unigene0041211;Unigene0041289
GO:0000911	cytokinesis by cell plate formation	1	2	0.495997	0.725987	Unigene0000695
GO:0000919	cell plate assembly	1	2	0.495997	0.725987	Unigene0000695
GO:0001709	cell fate determination	1	2	0.495997	0.725987	Unigene0034500
GO:0001738	morphogenesis of a polarized epithelium	1	2	0.495997	0.725987	Unigene0033910
GO:0002009	morphogenesis of an epithelium	1	2	0.495997	0.725987	Unigene0033910
GO:0006083	acetate metabolic process	1	2	0.495997	0.725987	Unigene0036940
GO:0006208	pyrimidine nucleobase catabolic process	1	2	0.495997	0.725987	Unigene0035100
GO:0006379	mRNA cleavage	1	2	0.495997	0.725987	Unigene0013636
GO:0006487	protein N-linked glycosylation	1	2	0.495997	0.725987	Unigene0000422
GO:0006656	phosphatidylcholine biosynthetic process	1	2	0.495997	0.725987	Unigene0033591
GO:0006706	steroid catabolic process	1	2	0.495997	0.725987	Unigene0039668
GO:0006768	biotin metabolic process	1	2	0.495997	0.725987	Unigene0007164
GO:0006971	hypotonic response	1	2	0.495997	0.725987	Unigene0002211
GO:0009250	glucan biosynthetic process	1	2	0.495997	0.725987	Unigene0036106
GO:0009611	response to wounding	1	2	0.495997	0.725987	Unigene0039109
GO:0009637	response to blue light	1	2	0.495997	0.725987	Unigene0036766
GO:0009968	negative regulation of signal transduction	1	2	0.495997	0.725987	Unigene0026080
GO:0010014	meristem initiation	1	2	0.495997	0.725987	Unigene0004752
GO:0010017	red or far-red light signaling pathway	1	2	0.495997	0.725987	Unigene0007955
GO:0010029	regulation of seed germination	1	2	0.495997	0.725987	Unigene0019537
GO:0010074	maintenance of meristem identity	1	2	0.495997	0.725987	Unigene0011100
GO:0010075	regulation of meristem growth	1	2	0.495997	0.725987	Unigene0024936
GO:0010192	mucilage biosynthetic process	1	2	0.495997	0.725987	Unigene0007216
GO:0010394	homogalacturonan metabolic process	1	2	0.495997	0.725987	Unigene0024227
GO:0010647	positive regulation of cell communication	1	2	0.495997	0.725987	Unigene0009203
GO:0010648	negative regulation of cell communication	1	2	0.495997	0.725987	Unigene0026080
GO:0015669	gas transport	1	2	0.495997	0.725987	Unigene0035094
GO:0015800	acidic amino acid transport	1	2	0.495997	0.725987	Unigene0032780
GO:0015807	L-amino acid transport	1	2	0.495997	0.725987	Unigene0032780
GO:0015813	L-glutamate transport	1	2	0.495997	0.725987	Unigene0032780
GO:0015840	urea transport	1	2	0.495997	0.725987	Unigene0034084
GO:0016116	carotenoid metabolic process	1	2	0.495997	0.725987	Unigene0009156
GO:0018065	protein-cofactor linkage	1	2	0.495997	0.725987	Unigene0009946
GO:0019682	glyceraldehyde-3-phosphate metabolic process	1	2	0.495997	0.725987	Unigene0038400
GO:0023057	negative regulation of signaling	1	2	0.495997	0.725987	Unigene0026080
GO:0030522	intracellular receptor signaling pathway	1	2	0.495997	0.725987	Unigene0036766
GO:0031056	regulation of histone modification	1	2	0.495997	0.725987	Unigene0024936
GO:0033044	regulation of chromosome organization	1	2	0.495997	0.725987	Unigene0024936
GO:0034308	primary alcohol metabolic process	1	2	0.495997	0.725987	Unigene0026853
GO:0034433	steroid esterification	1	2	0.495997	0.725987	Unigene0039668
GO:0040020	regulation of meiotic nuclear division	1	2	0.495997	0.725987	Unigene0022473
GO:0042350	GDP-L-fucose biosynthetic process	1	2	0.495997	0.725987	Unigene0038790
GO:0043090	amino acid import	1	2	0.495997	0.725987	Unigene0032780
GO:0043092	L-amino acid import	1	2	0.495997	0.725987	Unigene0032780
GO:0043200	response to amino acid	1	2	0.495997	0.725987	Unigene0013729
GO:0043462	regulation of ATPase activity	1	2	0.495997	0.725987	Unigene0005141
GO:0045995	regulation of embryonic development	1	2	0.495997	0.725987	Unigene0000054
GO:0046113	nucleobase catabolic process	1	2	0.495997	0.725987	Unigene0035100
GO:0046368	GDP-L-fucose metabolic process	1	2	0.495997	0.725987	Unigene0038790
GO:0046470	phosphatidylcholine metabolic process	1	2	0.495997	0.725987	Unigene0033591
GO:0048638	regulation of developmental growth	1	2	0.495997	0.725987	Unigene0024936
GO:0048729	tissue morphogenesis	1	2	0.495997	0.725987	Unigene0033910
GO:0051341	regulation of oxidoreductase activity	1	2	0.495997	0.725987	Unigene0000060
GO:0051353	positive regulation of oxidoreductase activity	1	2	0.495997	0.725987	Unigene0000060
GO:0051445	regulation of meiotic cell cycle	1	2	0.495997	0.725987	Unigene0022473
GO:0071478	cellular response to radiation	1	2	0.495997	0.725987	Unigene0007955
GO:0071482	cellular response to light stimulus	1	2	0.495997	0.725987	Unigene0007955
GO:0071489	cellular response to red or far red light	1	2	0.495997	0.725987	Unigene0007955
GO:0097164	ammonium ion metabolic process	1	2	0.495997	0.725987	Unigene0033591
GO:1900140	regulation of seedling development	1	2	0.495997	0.725987	Unigene0019537
GO:1901606	alpha-amino acid catabolic process	1	2	0.495997	0.725987	Unigene0019680
GO:1902275	regulation of chromatin organization	1	2	0.495997	0.725987	Unigene0024936
GO:1903308	regulation of chromatin modification	1	2	0.495997	0.725987	Unigene0024936
GO:0006664	glycolipid metabolic process	10	33	0.500141	0.729782	Unigene0009348;Unigene0011417;Unigene0011679;Unigene0021235;Unigene0031818;Unigene0034431;Unigene0035179;Unigene0035914;Unigene0037689;Unigene0038166
GO:0010564	regulation of cell cycle process	10	33	0.500141	0.729782	Unigene0002141;Unigene0005002;Unigene0007733;Unigene0011916;Unigene0020441;Unigene0022473;Unigene0023388;Unigene0032769;Unigene0034666;Unigene0037091
GO:1903509	liposaccharide metabolic process	10	33	0.500141	0.729782	Unigene0009348;Unigene0011417;Unigene0011679;Unigene0021235;Unigene0031818;Unigene0034431;Unigene0035179;Unigene0035914;Unigene0037689;Unigene0038166
GO:0043412	macromolecule modification	385	1326	0.501587	0.731136	Unigene0000048;Unigene0000051;Unigene0000054;Unigene0000060;Unigene0000079;Unigene0000099;Unigene0000101;Unigene0000138;Unigene0000146;Unigene0000168;Unigene0000208;Unigene0000229;Unigene0000236;Unigene0000338;Unigene0000422;Unigene0000442;Unigene0000474;Unigene0000479;Unigene0000498;Unigene0000508;Unigene0000660;Unigene0000695;Unigene0000739;Unigene0000774;Unigene0000833;Unigene0000923;Unigene00…
GO:0030029	actin filament-based process	14	47	0.508002	0.73698	Unigene0000054;Unigene0000253;Unigene0000922;Unigene0002215;Unigene0010843;Unigene0011916;Unigene0014407;Unigene0017529;Unigene0024936;Unigene0026263;Unigene0033910;Unigene0035478;Unigene0038166;Unigene0041247
GO:0030036	actin cytoskeleton organization	14	47	0.508002	0.73698	Unigene0000054;Unigene0000253;Unigene0000922;Unigene0002215;Unigene0010843;Unigene0011916;Unigene0014407;Unigene0017529;Unigene0024936;Unigene0026263;Unigene0033910;Unigene0035478;Unigene0038166;Unigene0041247
GO:0009451	RNA modification	25	85	0.508172	0.73698	Unigene0002808;Unigene0004641;Unigene0004882;Unigene0006055;Unigene0007482;Unigene0010313;Unigene0010986;Unigene0011387;Unigene0012975;Unigene0013433;Unigene0014337;Unigene0016201;Unigene0016956;Unigene0019830;Unigene0021197;Unigene0022213;Unigene0026887;Unigene0027678;Unigene0033909;Unigene0033968;Unigene0035774;Unigene0036849;Unigene0037966;Unigene0039928;Unigene0041019
GO:0006558	L-phenylalanine metabolic process	3	9	0.510437	0.73698	Unigene0024341;Unigene0032177;Unigene0036766
GO:0016050	vesicle organization	3	9	0.510437	0.73698	Unigene0014058;Unigene0034745;Unigene0036173
GO:0032504	multicellular organism reproduction	3	9	0.510437	0.73698	Unigene0001824;Unigene0005514;Unigene0036766
GO:0048609	multicellular organismal reproductive process	3	9	0.510437	0.73698	Unigene0001824;Unigene0005514;Unigene0036766
GO:1902221	erythrose 4-phosphate/phosphoenolpyruvate family amino acid metabolic process	3	9	0.510437	0.73698	Unigene0024341;Unigene0032177;Unigene0036766
GO:0000904	cell morphogenesis involved in differentiation	16	54	0.511141	0.73698	Unigene0000054;Unigene0000253;Unigene0000922;Unigene0001953;Unigene0007216;Unigene0011916;Unigene0017529;Unigene0024936;Unigene0027326;Unigene0032340;Unigene0033910;Unigene0035478;Unigene0038166;Unigene0039767;Unigene0041247;Unigene0041963
GO:0071229	cellular response to acid chemical	16	54	0.511141	0.73698	Unigene0005500;Unigene0008112;Unigene0009203;Unigene0010384;Unigene0010725;Unigene0010953;Unigene0011986;Unigene0017003;Unigene0017613;Unigene0018646;Unigene0035909;Unigene0036766;Unigene0038206;Unigene0038309;Unigene0041211;Unigene0041857
GO:0006464	cellular protein modification process	351	1210	0.511342	0.73698	Unigene0000048;Unigene0000051;Unigene0000054;Unigene0000060;Unigene0000099;Unigene0000101;Unigene0000138;Unigene0000146;Unigene0000168;Unigene0000208;Unigene0000229;Unigene0000236;Unigene0000338;Unigene0000422;Unigene0000442;Unigene0000474;Unigene0000479;Unigene0000498;Unigene0000508;Unigene0000660;Unigene0000695;Unigene0000739;Unigene0000774;Unigene0000833;Unigene0000923;Unigene0000938;Unigene00…
GO:0009767	photosynthetic electron transport chain	5	16	0.514995	0.741023	Unigene0017109;Unigene0029473;Unigene0037800;Unigene0038729;Unigene0039874
GO:0006644	phospholipid metabolic process	31	106	0.515197	0.741023	Unigene0000054;Unigene0000786;Unigene0001320;Unigene0003971;Unigene0006157;Unigene0006837;Unigene0008569;Unigene0010384;Unigene0011670;Unigene0011986;Unigene0014786;Unigene0017183;Unigene0023338;Unigene0024333;Unigene0030225;Unigene0030807;Unigene0033390;Unigene0033583;Unigene0033591;Unigene0033607;Unigene0033665;Unigene0034116;Unigene0035509;Unigene0035909;Unigene0036221;Unigene0036283;Unigene00…
GO:0043269	regulation of ion transport	11	37	0.523355	0.751989	Unigene0001953;Unigene0002667;Unigene0003292;Unigene0010384;Unigene0016944;Unigene0019339;Unigene0022382;Unigene0026256;Unigene0030470;Unigene0033633;Unigene0033971
GO:0048583	regulation of response to stimulus	13	44	0.525504	0.754309	Unigene0008112;Unigene0009203;Unigene0011986;Unigene0020037;Unigene0023428;Unigene0025775;Unigene0026080;Unigene0031751;Unigene0033821;Unigene0035164;Unigene0036766;Unigene0038708;Unigene0041211
GO:0036211	protein modification process	351	1213	0.535233	0.767493	Unigene0000048;Unigene0000051;Unigene0000054;Unigene0000060;Unigene0000099;Unigene0000101;Unigene0000138;Unigene0000146;Unigene0000168;Unigene0000208;Unigene0000229;Unigene0000236;Unigene0000338;Unigene0000422;Unigene0000442;Unigene0000474;Unigene0000479;Unigene0000498;Unigene0000508;Unigene0000660;Unigene0000695;Unigene0000739;Unigene0000774;Unigene0000833;Unigene0000923;Unigene0000938;Unigene00…
GO:0006810	transport	297	1027	0.539138	0.772308	Unigene0000020;Unigene0000048;Unigene0000051;Unigene0000167;Unigene0000230;Unigene0000231;Unigene0000341;Unigene0000473;Unigene0000474;Unigene0000544;Unigene0000679;Unigene0000685;Unigene0000695;Unigene0000720;Unigene0000999;Unigene0001136;Unigene0001294;Unigene0001299;Unigene0001424;Unigene0001498;Unigene0001518;Unigene0001952;Unigene0001953;Unigene0002118;Unigene0002157;Unigene0002455;Unigene00…
GO:0009069	serine family amino acid metabolic process	10	34	0.543932	0.778386	Unigene0000868;Unigene0010384;Unigene0012835;Unigene0015845;Unigene0016472;Unigene0018696;Unigene0033633;Unigene0033872;Unigene0038598;Unigene0039874
GO:0032879	regulation of localization	14	48	0.544811	0.778853	Unigene0001953;Unigene0002667;Unigene0003292;Unigene0010384;Unigene0016944;Unigene0019339;Unigene0022382;Unigene0023470;Unigene0026256;Unigene0030470;Unigene0032780;Unigene0033633;Unigene0033971;Unigene0039180
GO:0016570	histone modification	41	142	0.546065	0.779857	Unigene0000660;Unigene0000695;Unigene0000774;Unigene0000938;Unigene0001284;Unigene0002272;Unigene0002332;Unigene0004300;Unigene0007955;Unigene0010611;Unigene0011387;Unigene0011916;Unigene0012431;Unigene0015353;Unigene0016772;Unigene0019537;Unigene0021984;Unigene0022473;Unigene0023282;Unigene0024936;Unigene0025487;Unigene0026125;Unigene0027823;Unigene0029144;Unigene0030425;Unigene0032808;Unigene00…
GO:0009173	pyrimidine ribonucleoside monophosphate metabolic process	4	13	0.54807	0.781138	Unigene0004445;Unigene0014645;Unigene0025866;Unigene0038006
GO:0009174	pyrimidine ribonucleoside monophosphate biosynthetic process	4	13	0.54807	0.781138	Unigene0004445;Unigene0014645;Unigene0025866;Unigene0038006
GO:0042592	homeostatic process	44	153	0.558034	0.786746	Unigene0000048;Unigene0000051;Unigene0000454;Unigene0000677;Unigene0001733;Unigene0002211;Unigene0005192;Unigene0007645;Unigene0009534;Unigene0010514;Unigene0012001;Unigene0012617;Unigene0013071;Unigene0014429;Unigene0014540;Unigene0017445;Unigene0018847;Unigene0018936;Unigene0020419;Unigene0021110;Unigene0023470;Unigene0023520;Unigene0024127;Unigene0024936;Unigene0025480;Unigene0025775;Unigene00…
GO:0006835	dicarboxylic acid transport	2	6	0.558138	0.786746	Unigene0012697;Unigene0032780
GO:0006897	endocytosis	2	6	0.558138	0.786746	Unigene0009348;Unigene0024987
GO:0015695	organic cation transport	2	6	0.558138	0.786746	Unigene0017526;Unigene0039767
GO:0016567	protein ubiquitination	2	6	0.558138	0.786746	Unigene0023428;Unigene0035419
GO:0022898	regulation of transmembrane transporter activity	2	6	0.558138	0.786746	Unigene0001953;Unigene0016944
GO:0032409	regulation of transporter activity	2	6	0.558138	0.786746	Unigene0001953;Unigene0016944
GO:0032412	regulation of ion transmembrane transporter activity	2	6	0.558138	0.786746	Unigene0001953;Unigene0016944
GO:0033692	cellular polysaccharide biosynthetic process	2	6	0.558138	0.786746	Unigene0011329;Unigene0036106
GO:0034637	cellular carbohydrate biosynthetic process	2	6	0.558138	0.786746	Unigene0011329;Unigene0036106
GO:0048017	inositol lipid-mediated signaling	2	6	0.558138	0.786746	Unigene0001320;Unigene0014786
GO:0009933	meristem structural organization	13	45	0.563243	0.792359	Unigene0000480;Unigene0000922;Unigene0001952;Unigene0002269;Unigene0004752;Unigene0005532;Unigene0011489;Unigene0011534;Unigene0017529;Unigene0019902;Unigene0024936;Unigene0030772;Unigene0039250
GO:0048532	anatomical structure arrangement	13	45	0.563243	0.792359	Unigene0000480;Unigene0000922;Unigene0001952;Unigene0002269;Unigene0004752;Unigene0005532;Unigene0011489;Unigene0011534;Unigene0017529;Unigene0019902;Unigene0024936;Unigene0030772;Unigene0039250
GO:0042044	fluid transport	9	31	0.566425	0.796041	Unigene0000341;Unigene0012835;Unigene0013071;Unigene0014429;Unigene0018646;Unigene0026071;Unigene0035056;Unigene0037441;Unigene0037722
GO:0023052	signaling	121	421	0.567982	0.796642	Unigene0000051;Unigene0000997;Unigene0001320;Unigene0001824;Unigene0001952;Unigene0002066;Unigene0002190;Unigene0002207;Unigene0002211;Unigene0002277;Unigene0002448;Unigene0002611;Unigene0002625;Unigene0002943;Unigene0003160;Unigene0003577;Unigene0005360;Unigene0005500;Unigene0005532;Unigene0007733;Unigene0007955;Unigene0008056;Unigene0008112;Unigene0008365;Unigene0008378;Unigene0008612;Unigene00…
GO:0044700	single organism signaling	121	421	0.567982	0.796642	Unigene0000051;Unigene0000997;Unigene0001320;Unigene0001824;Unigene0001952;Unigene0002066;Unigene0002190;Unigene0002207;Unigene0002211;Unigene0002277;Unigene0002448;Unigene0002611;Unigene0002625;Unigene0002943;Unigene0003160;Unigene0003577;Unigene0005360;Unigene0005500;Unigene0005532;Unigene0007733;Unigene0007955;Unigene0008056;Unigene0008112;Unigene0008365;Unigene0008378;Unigene0008612;Unigene00…
GO:0006414	translational elongation	7	24	0.569901	0.798541	Unigene0006876;Unigene0012975;Unigene0017737;Unigene0034319;Unigene0036995;Unigene0038969;Unigene0041465
GO:0009408	response to heat	5	17	0.576322	0.805987	Unigene0007751;Unigene0033979;Unigene0037141;Unigene0039010;Unigene0039274
GO:0010817	regulation of hormone levels	14	49	0.58065	0.805987	Unigene0000341;Unigene0001952;Unigene0005594;Unigene0007358;Unigene0007818;Unigene0010189;Unigene0012835;Unigene0013506;Unigene0017090;Unigene0017613;Unigene0017966;Unigene0019902;Unigene0033910;Unigene0036328
GO:0006771	riboflavin metabolic process	3	10	0.590347	0.805987	Unigene0003076;Unigene0004594;Unigene0016582
GO:0006801	superoxide metabolic process	3	10	0.590347	0.805987	Unigene0035650;Unigene0036106;Unigene0037249
GO:0006839	mitochondrial transport	3	10	0.590347	0.805987	Unigene0014713;Unigene0033874;Unigene0039649
GO:0008064	regulation of actin polymerization or depolymerization	3	10	0.590347	0.805987	Unigene0014407;Unigene0026263;Unigene0035478
GO:0009739	response to gibberellin	3	10	0.590347	0.805987	Unigene0005500;Unigene0017003;Unigene0036766
GO:0010476	gibberellin mediated signaling pathway	3	10	0.590347	0.805987	Unigene0005500;Unigene0017003;Unigene0036766
GO:0019827	stem cell population maintenance	3	10	0.590347	0.805987	Unigene0010192;Unigene0011100;Unigene0024936
GO:0030041	actin filament polymerization	3	10	0.590347	0.805987	Unigene0014407;Unigene0026263;Unigene0035478
GO:0030832	regulation of actin filament length	3	10	0.590347	0.805987	Unigene0014407;Unigene0026263;Unigene0035478
GO:0030833	regulation of actin filament polymerization	3	10	0.590347	0.805987	Unigene0014407;Unigene0026263;Unigene0035478
GO:0030838	positive regulation of actin filament polymerization	3	10	0.590347	0.805987	Unigene0014407;Unigene0026263;Unigene0035478
GO:0031334	positive regulation of protein complex assembly	3	10	0.590347	0.805987	Unigene0014407;Unigene0026263;Unigene0035478
GO:0032271	regulation of protein polymerization	3	10	0.590347	0.805987	Unigene0014407;Unigene0026263;Unigene0035478
GO:0032273	positive regulation of protein polymerization	3	10	0.590347	0.805987	Unigene0014407;Unigene0026263;Unigene0035478
GO:0032956	regulation of actin cytoskeleton organization	3	10	0.590347	0.805987	Unigene0014407;Unigene0026263;Unigene0035478
GO:0032970	regulation of actin filament-based process	3	10	0.590347	0.805987	Unigene0014407;Unigene0026263;Unigene0035478
GO:0042726	flavin-containing compound metabolic process	3	10	0.590347	0.805987	Unigene0003076;Unigene0004594;Unigene0016582
GO:0043254	regulation of protein complex assembly	3	10	0.590347	0.805987	Unigene0014407;Unigene0026263;Unigene0035478
GO:0044087	regulation of cellular component biogenesis	3	10	0.590347	0.805987	Unigene0014407;Unigene0026263;Unigene0035478
GO:0044089	positive regulation of cellular component biogenesis	3	10	0.590347	0.805987	Unigene0014407;Unigene0026263;Unigene0035478
GO:0045010	actin nucleation	3	10	0.590347	0.805987	Unigene0014407;Unigene0026263;Unigene0035478
GO:0051495	positive regulation of cytoskeleton organization	3	10	0.590347	0.805987	Unigene0014407;Unigene0026263;Unigene0035478
GO:0071370	cellular response to gibberellin stimulus	3	10	0.590347	0.805987	Unigene0005500;Unigene0017003;Unigene0036766
GO:0098727	maintenance of cell number	3	10	0.590347	0.805987	Unigene0010192;Unigene0011100;Unigene0024936
GO:0043248	proteasome assembly	8	28	0.591209	0.805987	Unigene0012760;Unigene0021042;Unigene0022664;Unigene0024320;Unigene0024361;Unigene0036660;Unigene0039731;Unigene0040385
GO:0048588	developmental cell growth	8	28	0.591209	0.805987	Unigene0000863;Unigene0017966;Unigene0026071;Unigene0033594;Unigene0033910;Unigene0036095;Unigene0037441;Unigene0037533
GO:0072522	purine-containing compound biosynthetic process	13	46	0.599779	0.816881	Unigene0002207;Unigene0003687;Unigene0014153;Unigene0022679;Unigene0024361;Unigene0027249;Unigene0028105;Unigene0034015;Unigene0034626;Unigene0035073;Unigene0038309;Unigene0039874;Unigene0041484
GO:0065009	regulation of molecular function	28	99	0.601175	0.817992	Unigene0000060;Unigene0000101;Unigene0000578;Unigene0000739;Unigene0001953;Unigene0002332;Unigene0005141;Unigene0005532;Unigene0008856;Unigene0009203;Unigene0011689;Unigene0014877;Unigene0016079;Unigene0016232;Unigene0016944;Unigene0017346;Unigene0020026;Unigene0033265;Unigene0035234;Unigene0035857;Unigene0036698;Unigene0036766;Unigene0037777;Unigene0038017;Unigene0039742;Unigene0039908;Unigene00…
GO:0009311	oligosaccharide metabolic process	11	39	0.603976	0.821012	Unigene0003292;Unigene0003906;Unigene0006727;Unigene0016450;Unigene0019916;Unigene0023650;Unigene0034082;Unigene0034588;Unigene0037800;Unigene0038914;Unigene0041693
GO:0007165	signal transduction	119	417	0.604676	0.821172	Unigene0000051;Unigene0000997;Unigene0001320;Unigene0001824;Unigene0001952;Unigene0002066;Unigene0002190;Unigene0002207;Unigene0002211;Unigene0002277;Unigene0002448;Unigene0002611;Unigene0002625;Unigene0002943;Unigene0003160;Unigene0003577;Unigene0005360;Unigene0005500;Unigene0005532;Unigene0007733;Unigene0007955;Unigene0008056;Unigene0008112;Unigene0008365;Unigene0008378;Unigene0008612;Unigene00…
GO:0006073	cellular glucan metabolic process	43	152	0.608437	0.82527	Unigene0000230;Unigene0001009;Unigene0003051;Unigene0003292;Unigene0003906;Unigene0003971;Unigene0004992;Unigene0005329;Unigene0006727;Unigene0009795;Unigene0010384;Unigene0011679;Unigene0011784;Unigene0011805;Unigene0014466;Unigene0016450;Unigene0017090;Unigene0018725;Unigene0023650;Unigene0023749;Unigene0025710;Unigene0026071;Unigene0027576;Unigene0028401;Unigene0032911;Unigene0034082;Unigene00…
GO:0009218	pyrimidine ribonucleotide metabolic process	4	14	0.613976	0.82527	Unigene0004445;Unigene0014645;Unigene0025866;Unigene0038006
GO:0009220	pyrimidine ribonucleotide biosynthetic process	4	14	0.613976	0.82527	Unigene0004445;Unigene0014645;Unigene0025866;Unigene0038006
GO:0046132	pyrimidine ribonucleoside biosynthetic process	4	14	0.613976	0.82527	Unigene0004445;Unigene0014645;Unigene0025866;Unigene0038006
GO:0046134	pyrimidine nucleoside biosynthetic process	4	14	0.613976	0.82527	Unigene0004445;Unigene0014645;Unigene0025866;Unigene0038006
GO:0032989	cellular component morphogenesis	27	96	0.614074	0.82527	Unigene0000054;Unigene0000253;Unigene0000922;Unigene0001953;Unigene0005514;Unigene0007216;Unigene0008948;Unigene0010192;Unigene0010746;Unigene0011916;Unigene0017529;Unigene0018036;Unigene0024579;Unigene0024936;Unigene0025710;Unigene0027326;Unigene0032340;Unigene0033594;Unigene0033910;Unigene0034399;Unigene0035412;Unigene0035478;Unigene0038166;Unigene0038313;Unigene0039767;Unigene0041247;Unigene00…
GO:0006417	regulation of translation	14	50	0.615281	0.82527	Unigene0006876;Unigene0010153;Unigene0012975;Unigene0017737;Unigene0018701;Unigene0024575;Unigene0029320;Unigene0033124;Unigene0033206;Unigene0033467;Unigene0034319;Unigene0035070;Unigene0038969;Unigene0041465
GO:0034248	regulation of cellular amide metabolic process	14	50	0.615281	0.82527	Unigene0006876;Unigene0010153;Unigene0012975;Unigene0017737;Unigene0018701;Unigene0024575;Unigene0029320;Unigene0033124;Unigene0033206;Unigene0033467;Unigene0034319;Unigene0035070;Unigene0038969;Unigene0041465
GO:1902679	negative regulation of RNA biosynthetic process	14	50	0.615281	0.82527	Unigene0011489;Unigene0011916;Unigene0012431;Unigene0014931;Unigene0022473;Unigene0024137;Unigene0030425;Unigene0031349;Unigene0037091;Unigene0037701;Unigene0037750;Unigene0039250;Unigene0039617;Unigene0042111
GO:0044264	cellular polysaccharide metabolic process	44	156	0.618105	0.82527	Unigene0000230;Unigene0001009;Unigene0003051;Unigene0003292;Unigene0003906;Unigene0003971;Unigene0004992;Unigene0005329;Unigene0006727;Unigene0009795;Unigene0010384;Unigene0011329;Unigene0011679;Unigene0011784;Unigene0011805;Unigene0014466;Unigene0016450;Unigene0017090;Unigene0018725;Unigene0023650;Unigene0023749;Unigene0025710;Unigene0026071;Unigene0027576;Unigene0028401;Unigene0032911;Unigene00…
GO:0000160	phosphorelay signal transduction system	7	25	0.618781	0.82527	Unigene0015770;Unigene0021833;Unigene0030772;Unigene0035512;Unigene0038057;Unigene0038708;Unigene0038753
GO:0051321	meiotic cell cycle	7	25	0.618781	0.82527	Unigene0000454;Unigene0000677;Unigene0000695;Unigene0011916;Unigene0021883;Unigene0022473;Unigene0026572
GO:1903046	meiotic cell cycle process	7	25	0.618781	0.82527	Unigene0000454;Unigene0000677;Unigene0000695;Unigene0011916;Unigene0021883;Unigene0022473;Unigene0026572
GO:0005984	disaccharide metabolic process	10	36	0.626623	0.82527	Unigene0003292;Unigene0003906;Unigene0006727;Unigene0016450;Unigene0019916;Unigene0023650;Unigene0034082;Unigene0034588;Unigene0037800;Unigene0038914
GO:0009890	negative regulation of biosynthetic process	15	54	0.629621	0.82527	Unigene0011489;Unigene0011916;Unigene0012431;Unigene0014931;Unigene0022473;Unigene0024137;Unigene0030425;Unigene0031349;Unigene0034376;Unigene0037091;Unigene0037701;Unigene0037750;Unigene0039250;Unigene0039617;Unigene0042111
GO:0016192	vesicle-mediated transport	33	118	0.633207	0.82527	Unigene0000230;Unigene0002455;Unigene0002502;Unigene0003051;Unigene0007216;Unigene0009348;Unigene0009795;Unigene0010963;Unigene0011190;Unigene0012657;Unigene0014058;Unigene0018036;Unigene0019227;Unigene0021042;Unigene0021833;Unigene0023470;Unigene0024503;Unigene0024987;Unigene0025710;Unigene0033948;Unigene0034500;Unigene0034602;Unigene0034745;Unigene0035060;Unigene0036173;Unigene0036232;Unigene00…
GO:0009699	phenylpropanoid biosynthetic process	5	18	0.633259	0.82527	Unigene0000060;Unigene0034311;Unigene0038707;Unigene0040783;Unigene0041182
GO:0051049	regulation of transport	13	47	0.634871	0.82527	Unigene0001953;Unigene0002667;Unigene0003292;Unigene0010384;Unigene0016944;Unigene0019339;Unigene0022382;Unigene0023470;Unigene0026256;Unigene0030470;Unigene0032780;Unigene0033633;Unigene0033971
GO:0050801	ion homeostasis	18	65	0.638514	0.82527	Unigene0000048;Unigene0002211;Unigene0009534;Unigene0012001;Unigene0012617;Unigene0013071;Unigene0023470;Unigene0023520;Unigene0025480;Unigene0025775;Unigene0026180;Unigene0026256;Unigene0026471;Unigene0034500;Unigene0037722;Unigene0037800;Unigene0037972;Unigene0040119
GO:0000079	regulation of cyclin-dependent protein serine/threonine kinase activity	1	3	0.642221	0.82527	Unigene0017346
GO:0000255	allantoin metabolic process	1	3	0.642221	0.82527	Unigene0034082
GO:0001763	morphogenesis of a branching structure	1	3	0.642221	0.82527	Unigene0040783
GO:0002831	regulation of response to biotic stimulus	1	3	0.642221	0.82527	Unigene0041211
GO:0003333	amino acid transmembrane transport	1	3	0.642221	0.82527	Unigene0032780
GO:0006722	triterpenoid metabolic process	1	3	0.642221	0.82527	Unigene0024918
GO:0006817	phosphate ion transport	1	3	0.642221	0.82527	Unigene0022940
GO:0006821	chloride transport	1	3	0.642221	0.82527	Unigene0030470
GO:0007127	meiosis I	1	3	0.642221	0.82527	Unigene0022473
GO:0008105	asymmetric protein localization	1	3	0.642221	0.82527	Unigene0005594
GO:0009073	aromatic amino acid family biosynthetic process	1	3	0.642221	0.82527	Unigene0020604
GO:0009744	response to sucrose	1	3	0.642221	0.82527	Unigene0000051
GO:0009834	plant-type secondary cell wall biogenesis	1	3	0.642221	0.82527	Unigene0009707
GO:0010162	seed dormancy process	1	3	0.642221	0.82527	Unigene0036766
GO:0016093	polyprenol metabolic process	1	3	0.642221	0.82527	Unigene0039664
GO:0016094	polyprenol biosynthetic process	1	3	0.642221	0.82527	Unigene0039664
GO:0016104	triterpenoid biosynthetic process	1	3	0.642221	0.82527	Unigene0024918
GO:0017182	peptidyl-diphthamide metabolic process	1	3	0.642221	0.82527	Unigene0037826
GO:0018126	protein hydroxylation	1	3	0.642221	0.82527	Unigene0033611
GO:0018202	peptidyl-histidine modification	1	3	0.642221	0.82527	Unigene0037826
GO:0018904	ether metabolic process	1	3	0.642221	0.82527	Unigene0014540
GO:0022611	dormancy process	1	3	0.642221	0.82527	Unigene0036766
GO:0035266	meristem growth	1	3	0.642221	0.82527	Unigene0024936
GO:0045786	negative regulation of cell cycle	1	3	0.642221	0.82527	Unigene0032769
GO:0048585	negative regulation of response to stimulus	1	3	0.642221	0.82527	Unigene0026080
GO:0052386	cell wall thickening	1	3	0.642221	0.82527	Unigene0022940
GO:0072529	pyrimidine-containing compound catabolic process	1	3	0.642221	0.82527	Unigene0035100
GO:0098656	anion transmembrane transport	1	3	0.642221	0.82527	Unigene0032780
GO:1903825	organic acid transmembrane transport	1	3	0.642221	0.82527	Unigene0032780
GO:1904029	regulation of cyclin-dependent protein kinase activity	1	3	0.642221	0.82527	Unigene0017346
GO:0006650	glycerophospholipid metabolic process	23	83	0.643599	0.82527	Unigene0000054;Unigene0001320;Unigene0003971;Unigene0006157;Unigene0006837;Unigene0010384;Unigene0011670;Unigene0011986;Unigene0014786;Unigene0017183;Unigene0023338;Unigene0024333;Unigene0030225;Unigene0030807;Unigene0033390;Unigene0033591;Unigene0033607;Unigene0034116;Unigene0035909;Unigene0036221;Unigene0039742;Unigene0040519;Unigene0041412
GO:0022622	root system development	14	51	0.648502	0.82527	Unigene0000051;Unigene0000054;Unigene0000922;Unigene0001455;Unigene0011916;Unigene0017529;Unigene0020446;Unigene0021825;Unigene0024936;Unigene0033910;Unigene0035412;Unigene0037533;Unigene0038166;Unigene0041247
GO:0048364	root development	14	51	0.648502	0.82527	Unigene0000051;Unigene0000054;Unigene0000922;Unigene0001455;Unigene0011916;Unigene0017529;Unigene0020446;Unigene0021825;Unigene0024936;Unigene0033910;Unigene0035412;Unigene0037533;Unigene0038166;Unigene0041247
GO:0051253	negative regulation of RNA metabolic process	14	51	0.648502	0.82527	Unigene0011489;Unigene0011916;Unigene0012431;Unigene0014931;Unigene0022473;Unigene0024137;Unigene0030425;Unigene0031349;Unigene0037091;Unigene0037701;Unigene0037750;Unigene0039250;Unigene0039617;Unigene0042111
GO:0006473	protein acetylation	2	7	0.64922	0.82527	Unigene0000938;Unigene0023282
GO:0006475	internal protein amino acid acetylation	2	7	0.64922	0.82527	Unigene0000938;Unigene0023282
GO:0006730	one-carbon metabolic process	2	7	0.64922	0.82527	Unigene0015845;Unigene0035939
GO:0006814	sodium ion transport	2	7	0.64922	0.82527	Unigene0026471;Unigene0037972
GO:0006825	copper ion transport	2	7	0.64922	0.82527	Unigene0035528;Unigene0039625
GO:0009132	nucleoside diphosphate metabolic process	2	7	0.64922	0.82527	Unigene0009325;Unigene0036437
GO:0009845	seed germination	2	7	0.64922	0.82527	Unigene0000051;Unigene0019537
GO:0010118	stomatal movement	2	7	0.64922	0.82527	Unigene0011986;Unigene0017346
GO:0016485	protein processing	2	7	0.64922	0.82527	Unigene0007681;Unigene0034827
GO:0016573	histone acetylation	2	7	0.64922	0.82527	Unigene0000938;Unigene0023282
GO:0018393	internal peptidyl-lysine acetylation	2	7	0.64922	0.82527	Unigene0000938;Unigene0023282
GO:0018394	peptidyl-lysine acetylation	2	7	0.64922	0.82527	Unigene0000938;Unigene0023282
GO:0031329	regulation of cellular catabolic process	2	7	0.64922	0.82527	Unigene0000054;Unigene0008337
GO:0043543	protein acylation	2	7	0.64922	0.82527	Unigene0000938;Unigene0023282
GO:0051604	protein maturation	2	7	0.64922	0.82527	Unigene0007681;Unigene0034827
GO:0072503	cellular divalent inorganic cation homeostasis	2	7	0.64922	0.82527	Unigene0023470;Unigene0026180
GO:0072507	divalent inorganic cation homeostasis	2	7	0.64922	0.82527	Unigene0023470;Unigene0026180
GO:0090351	seedling development	2	7	0.64922	0.82527	Unigene0000051;Unigene0019537
GO:0098542	defense response to other organism	9	33	0.651079	0.826888	Unigene0004223;Unigene0008614;Unigene0014931;Unigene0015492;Unigene0017354;Unigene0017613;Unigene0025775;Unigene0039476;Unigene0041211
GO:0006022	aminoglycan metabolic process	3	11	0.661264	0.835691	Unigene0006333;Unigene0031868;Unigene0039851
GO:0010638	positive regulation of organelle organization	3	11	0.661264	0.835691	Unigene0014407;Unigene0026263;Unigene0035478
GO:0031123	RNA 3'-end processing	3	11	0.661264	0.835691	Unigene0000145;Unigene0009615;Unigene0023127
GO:0051130	positive regulation of cellular component organization	3	11	0.661264	0.835691	Unigene0014407;Unigene0026263;Unigene0035478
GO:0055076	transition metal ion homeostasis	3	11	0.661264	0.835691	Unigene0012001;Unigene0012617;Unigene0040119
GO:0008213	protein alkylation	27	98	0.662156	0.835691	Unigene0000660;Unigene0000695;Unigene0002332;Unigene0010611;Unigene0011387;Unigene0011916;Unigene0012431;Unigene0016772;Unigene0019537;Unigene0021984;Unigene0022473;Unigene0024936;Unigene0025487;Unigene0026125;Unigene0033190;Unigene0033449;Unigene0033663;Unigene0033958;Unigene0034255;Unigene0035514;Unigene0037740;Unigene0038006;Unigene0038720;Unigene0040171;Unigene0040330;Unigene0040457;Unigene00…
GO:0040007	growth	27	98	0.662156	0.835691	Unigene0000054;Unigene0000240;Unigene0000685;Unigene0000863;Unigene0000922;Unigene0001952;Unigene0002448;Unigene0005002;Unigene0008948;Unigene0011916;Unigene0014650;Unigene0017529;Unigene0017966;Unigene0018036;Unigene0021042;Unigene0024936;Unigene0026071;Unigene0026648;Unigene0032769;Unigene0033594;Unigene0033910;Unigene0036095;Unigene0037091;Unigene0037441;Unigene0037533;Unigene0040676;Unigene00…
GO:0019684	photosynthesis, light reaction	7	26	0.664439	0.836736	Unigene0017109;Unigene0027678;Unigene0029473;Unigene0037800;Unigene0038729;Unigene0039022;Unigene0039874
GO:0007154	cell communication	133	471	0.664868	0.836736	Unigene0000051;Unigene0000997;Unigene0001320;Unigene0001824;Unigene0001952;Unigene0002066;Unigene0002190;Unigene0002207;Unigene0002211;Unigene0002277;Unigene0002448;Unigene0002611;Unigene0002625;Unigene0002943;Unigene0003160;Unigene0003577;Unigene0005360;Unigene0005500;Unigene0005532;Unigene0007282;Unigene0007733;Unigene0007955;Unigene0008056;Unigene0008112;Unigene0008365;Unigene0008378;Unigene00…
GO:0006873	cellular ion homeostasis	13	48	0.668322	0.836736	Unigene0000048;Unigene0002211;Unigene0009534;Unigene0012001;Unigene0013071;Unigene0023470;Unigene0023520;Unigene0025480;Unigene0026180;Unigene0026256;Unigene0034500;Unigene0037722;Unigene0037800
GO:0015849	organic acid transport	13	48	0.668322	0.836736	Unigene0006813;Unigene0007571;Unigene0012697;Unigene0015731;Unigene0021522;Unigene0023470;Unigene0024579;Unigene0030805;Unigene0032780;Unigene0033910;Unigene0037826;Unigene0039767;Unigene0041856
GO:0015931	nucleobase-containing compound transport	13	48	0.668322	0.836736	Unigene0000999;Unigene0002118;Unigene0004223;Unigene0020251;Unigene0021468;Unigene0021522;Unigene0024579;Unigene0024936;Unigene0029284;Unigene0034255;Unigene0035886;Unigene0036385;Unigene0040969
GO:0045892	negative regulation of transcription, DNA-templated	13	48	0.668322	0.836736	Unigene0011489;Unigene0011916;Unigene0012431;Unigene0014931;Unigene0022473;Unigene0024137;Unigene0030425;Unigene0031349;Unigene0037091;Unigene0037701;Unigene0037750;Unigene0039250;Unigene0039617
GO:0046942	carboxylic acid transport	13	48	0.668322	0.836736	Unigene0006813;Unigene0007571;Unigene0012697;Unigene0015731;Unigene0021522;Unigene0023470;Unigene0024579;Unigene0030805;Unigene0032780;Unigene0033910;Unigene0037826;Unigene0039767;Unigene0041856
GO:0055082	cellular chemical homeostasis	13	48	0.668322	0.836736	Unigene0000048;Unigene0002211;Unigene0009534;Unigene0012001;Unigene0013071;Unigene0023470;Unigene0023520;Unigene0025480;Unigene0026180;Unigene0026256;Unigene0034500;Unigene0037722;Unigene0037800
GO:1903507	negative regulation of nucleic acid-templated transcription	13	48	0.668322	0.836736	Unigene0011489;Unigene0011916;Unigene0012431;Unigene0014931;Unigene0022473;Unigene0024137;Unigene0030425;Unigene0031349;Unigene0037091;Unigene0037701;Unigene0037750;Unigene0039250;Unigene0039617
GO:0006213	pyrimidine nucleoside metabolic process	4	15	0.673527	0.839529	Unigene0004445;Unigene0014645;Unigene0025866;Unigene0038006
GO:0009067	aspartate family amino acid biosynthetic process	4	15	0.673527	0.839529	Unigene0009495;Unigene0010007;Unigene0014690;Unigene0039947
GO:0010260	organ senescence	4	15	0.673527	0.839529	Unigene0001824;Unigene0034667;Unigene0037750;Unigene0039668
GO:0046131	pyrimidine ribonucleoside metabolic process	4	15	0.673527	0.839529	Unigene0004445;Unigene0014645;Unigene0025866;Unigene0038006
GO:0070192	chromosome organization involved in meiotic cell cycle	4	15	0.673527	0.839529	Unigene0000695;Unigene0011916;Unigene0021883;Unigene0026572
GO:0048569	post-embryonic organ development	8	30	0.677619	0.843884	Unigene0000079;Unigene0012461;Unigene0012869;Unigene0016772;Unigene0022473;Unigene0024936;Unigene0035412;Unigene0041838
GO:0045934	negative regulation of nucleobase-containing compound metabolic process	14	52	0.680152	0.846292	Unigene0011489;Unigene0011916;Unigene0012431;Unigene0014931;Unigene0022473;Unigene0024137;Unigene0030425;Unigene0031349;Unigene0037091;Unigene0037701;Unigene0037750;Unigene0039250;Unigene0039617;Unigene0042111
GO:0000902	cell morphogenesis	22	81	0.683483	0.849686	Unigene0000054;Unigene0000253;Unigene0000922;Unigene0001953;Unigene0007216;Unigene0008948;Unigene0010192;Unigene0011916;Unigene0017529;Unigene0024936;Unigene0025710;Unigene0027326;Unigene0032340;Unigene0033594;Unigene0033910;Unigene0035412;Unigene0035478;Unigene0038166;Unigene0038313;Unigene0039767;Unigene0041247;Unigene0041963
GO:0006448	regulation of translational elongation	6	23	0.696238	0.863261	Unigene0006876;Unigene0012975;Unigene0017737;Unigene0034319;Unigene0038969;Unigene0041465
GO:0032535	regulation of cellular component size	6	23	0.696238	0.863261	Unigene0014407;Unigene0017090;Unigene0019902;Unigene0026263;Unigene0033910;Unigene0035478
GO:0090066	regulation of anatomical structure size	6	23	0.696238	0.863261	Unigene0014407;Unigene0017090;Unigene0019902;Unigene0026263;Unigene0033910;Unigene0035478
GO:0019725	cellular homeostasis	31	114	0.699519	0.866569	Unigene0000048;Unigene0001733;Unigene0002211;Unigene0005192;Unigene0007645;Unigene0009534;Unigene0010514;Unigene0012001;Unigene0013071;Unigene0014429;Unigene0014540;Unigene0017445;Unigene0018847;Unigene0018936;Unigene0020419;Unigene0021110;Unigene0023470;Unigene0023520;Unigene0025480;Unigene0026180;Unigene0026256;Unigene0027779;Unigene0029281;Unigene0032285;Unigene0034500;Unigene0036106;Unigene00…
GO:0048878	chemical homeostasis	19	71	0.704301	0.870553	Unigene0000048;Unigene0000051;Unigene0002211;Unigene0009534;Unigene0012001;Unigene0012617;Unigene0013071;Unigene0023470;Unigene0023520;Unigene0025480;Unigene0025775;Unigene0026180;Unigene0026256;Unigene0026471;Unigene0034500;Unigene0037722;Unigene0037800;Unigene0037972;Unigene0040119
GO:0051239	regulation of multicellular organismal process	41	150	0.704586	0.870553	Unigene0000051;Unigene0000054;Unigene0000999;Unigene0001824;Unigene0002141;Unigene0002207;Unigene0004483;Unigene0005594;Unigene0007164;Unigene0008378;Unigene0011387;Unigene0011916;Unigene0012431;Unigene0015770;Unigene0017090;Unigene0019537;Unigene0021390;Unigene0022435;Unigene0022473;Unigene0023428;Unigene0023647;Unigene0023749;Unigene0024936;Unigene0025179;Unigene0025372;Unigene0027212;Unigene00…
GO:2000026	regulation of multicellular organismal development	41	150	0.704586	0.870553	Unigene0000051;Unigene0000054;Unigene0000999;Unigene0001824;Unigene0002141;Unigene0002207;Unigene0004483;Unigene0005594;Unigene0007164;Unigene0008378;Unigene0011387;Unigene0011916;Unigene0012431;Unigene0015770;Unigene0017090;Unigene0019537;Unigene0021390;Unigene0022435;Unigene0022473;Unigene0023428;Unigene0023647;Unigene0023749;Unigene0024936;Unigene0025179;Unigene0025372;Unigene0027212;Unigene00…
GO:0042546	cell wall biogenesis	7	27	0.706575	0.872246	Unigene0005067;Unigene0009707;Unigene0017090;Unigene0018916;Unigene0025372;Unigene0026071;Unigene0032709
GO:0010558	negative regulation of macromolecule biosynthetic process	14	53	0.710106	0.872675	Unigene0011489;Unigene0011916;Unigene0012431;Unigene0014931;Unigene0022473;Unigene0024137;Unigene0030425;Unigene0031349;Unigene0037091;Unigene0037701;Unigene0037750;Unigene0039250;Unigene0039617;Unigene0042111
GO:0031327	negative regulation of cellular biosynthetic process	14	53	0.710106	0.872675	Unigene0011489;Unigene0011916;Unigene0012431;Unigene0014931;Unigene0022473;Unigene0024137;Unigene0030425;Unigene0031349;Unigene0037091;Unigene0037701;Unigene0037750;Unigene0039250;Unigene0039617;Unigene0042111
GO:0007049	cell cycle	56	204	0.71457	0.872675	Unigene0000054;Unigene0000279;Unigene0000454;Unigene0000677;Unigene0000695;Unigene0001294;Unigene0002141;Unigene0002207;Unigene0003577;Unigene0005002;Unigene0007733;Unigene0007818;Unigene0009795;Unigene0011541;Unigene0011916;Unigene0012117;Unigene0016772;Unigene0017346;Unigene0017354;Unigene0017529;Unigene0017608;Unigene0020441;Unigene0021029;Unigene0021883;Unigene0022435;Unigene0022473;Unigene00…
GO:0009141	nucleoside triphosphate metabolic process	8	31	0.716295	0.872675	Unigene0014153;Unigene0024361;Unigene0027249;Unigene0031626;Unigene0034626;Unigene0038309;Unigene0039874;Unigene0040377
GO:0051179	localization	368	1297	0.719545	0.872675	Unigene0000020;Unigene0000048;Unigene0000051;Unigene0000076;Unigene0000167;Unigene0000217;Unigene0000230;Unigene0000231;Unigene0000265;Unigene0000341;Unigene0000473;Unigene0000474;Unigene0000485;Unigene0000544;Unigene0000679;Unigene0000685;Unigene0000695;Unigene0000720;Unigene0000999;Unigene0001129;Unigene0001136;Unigene0001294;Unigene0001299;Unigene0001424;Unigene0001498;Unigene0001518;Unigene00…
GO:0006091	generation of precursor metabolites and energy	31	115	0.719636	0.872675	Unigene0001009;Unigene0006998;Unigene0009203;Unigene0010384;Unigene0013501;Unigene0013645;Unigene0016893;Unigene0017109;Unigene0018447;Unigene0020478;Unigene0026085;Unigene0026256;Unigene0027678;Unigene0028715;Unigene0029473;Unigene0031019;Unigene0031165;Unigene0031517;Unigene0033633;Unigene0036438;Unigene0036691;Unigene0037800;Unigene0038309;Unigene0038602;Unigene0038729;Unigene0039022;Unigene00…
GO:0016569	covalent chromatin modification	41	151	0.722118	0.872675	Unigene0000660;Unigene0000695;Unigene0000774;Unigene0000938;Unigene0001284;Unigene0002272;Unigene0002332;Unigene0004300;Unigene0007955;Unigene0010611;Unigene0011387;Unigene0011916;Unigene0012431;Unigene0015353;Unigene0016772;Unigene0019537;Unigene0021984;Unigene0022473;Unigene0023282;Unigene0024936;Unigene0025487;Unigene0026125;Unigene0027823;Unigene0029144;Unigene0030425;Unigene0032808;Unigene00…
GO:0006661	phosphatidylinositol biosynthetic process	2	8	0.72466	0.872675	Unigene0000054;Unigene0006837
GO:0006749	glutathione metabolic process	2	8	0.72466	0.872675	Unigene0018077;Unigene0034985
GO:0009629	response to gravity	2	8	0.72466	0.872675	Unigene0028106;Unigene0033910
GO:0009630	gravitropism	2	8	0.72466	0.872675	Unigene0028106;Unigene0033910
GO:0009787	regulation of abscisic acid-activated signaling pathway	2	8	0.72466	0.872675	Unigene0011986;Unigene0036766
GO:0015858	nucleoside transport	2	8	0.72466	0.872675	Unigene0002118;Unigene0035886
GO:1901419	regulation of response to alcohol	2	8	0.72466	0.872675	Unigene0011986;Unigene0036766
GO:0015980	energy derivation by oxidation of organic compounds	9	35	0.725457	0.872675	Unigene0001009;Unigene0013645;Unigene0018447;Unigene0020478;Unigene0031517;Unigene0036691;Unigene0038602;Unigene0039220;Unigene0039928
GO:0006595	polyamine metabolic process	4	16	0.726371	0.872675	Unigene0006075;Unigene0006876;Unigene0023482;Unigene0041182
GO:0019932	second-messenger-mediated signaling	4	16	0.726371	0.872675	Unigene0002211;Unigene0013729;Unigene0033176;Unigene0034431
GO:0042127	regulation of cell proliferation	4	16	0.726371	0.872675	Unigene0000783;Unigene0005477;Unigene0033634;Unigene0037091
GO:0044262	cellular carbohydrate metabolic process	51	187	0.726754	0.872675	Unigene0000230;Unigene0001009;Unigene0003051;Unigene0003292;Unigene0003906;Unigene0003971;Unigene0004992;Unigene0005329;Unigene0006727;Unigene0006746;Unigene0008337;Unigene0009795;Unigene0010384;Unigene0011329;Unigene0011679;Unigene0011784;Unigene0011805;Unigene0014466;Unigene0016450;Unigene0017090;Unigene0018725;Unigene0019916;Unigene0022554;Unigene0023650;Unigene0023749;Unigene0024538;Unigene00…
GO:0071705	nitrogen compound transport	27	101	0.728144	0.872675	Unigene0000999;Unigene0002118;Unigene0004223;Unigene0006813;Unigene0020251;Unigene0021468;Unigene0021522;Unigene0023470;Unigene0023876;Unigene0023877;Unigene0024579;Unigene0024936;Unigene0029284;Unigene0029334;Unigene0032780;Unigene0032874;Unigene0033715;Unigene0033910;Unigene0034084;Unigene0034255;Unigene0035301;Unigene0035886;Unigene0036385;Unigene0037470;Unigene0038573;Unigene0040969;Unigene00…
GO:0006470	protein dephosphorylation	5	20	0.731958	0.872675	Unigene0002409;Unigene0013182;Unigene0022471;Unigene0033057;Unigene0033171
GO:0015833	peptide transport	5	20	0.731958	0.872675	Unigene0029334;Unigene0032874;Unigene0033715;Unigene0037470;Unigene0041182
GO:0055065	metal ion homeostasis	5	20	0.731958	0.872675	Unigene0002211;Unigene0012001;Unigene0012617;Unigene0025775;Unigene0040119
GO:0071396	cellular response to lipid	5	20	0.731958	0.872675	Unigene0005500;Unigene0011986;Unigene0017003;Unigene0033594;Unigene0036766
GO:0006479	protein methylation	25	94	0.733177	0.872675	Unigene0000660;Unigene0000695;Unigene0002332;Unigene0010611;Unigene0011387;Unigene0011916;Unigene0012431;Unigene0016772;Unigene0019537;Unigene0021984;Unigene0022473;Unigene0024936;Unigene0025487;Unigene0026125;Unigene0033190;Unigene0033663;Unigene0033958;Unigene0034255;Unigene0035514;Unigene0037740;Unigene0038006;Unigene0040171;Unigene0040330;Unigene0040457;Unigene0040965
GO:0055080	cation homeostasis	10	39	0.734116	0.872675	Unigene0002211;Unigene0012001;Unigene0012617;Unigene0023470;Unigene0025775;Unigene0026180;Unigene0026471;Unigene0034500;Unigene0037972;Unigene0040119
GO:0051172	negative regulation of nitrogen compound metabolic process	14	54	0.738276	0.872675	Unigene0011489;Unigene0011916;Unigene0012431;Unigene0014931;Unigene0022473;Unigene0024137;Unigene0030425;Unigene0031349;Unigene0037091;Unigene0037701;Unigene0037750;Unigene0039250;Unigene0039617;Unigene0042111
GO:0008283	cell proliferation	6	24	0.73835	0.872675	Unigene0000783;Unigene0001824;Unigene0005477;Unigene0011757;Unigene0033634;Unigene0037091
GO:0033993	response to lipid	6	24	0.73835	0.872675	Unigene0005500;Unigene0011986;Unigene0017003;Unigene0031979;Unigene0033594;Unigene0036766
GO:0046486	glycerolipid metabolic process	23	87	0.738859	0.872675	Unigene0000054;Unigene0001320;Unigene0003971;Unigene0006157;Unigene0006837;Unigene0010384;Unigene0011670;Unigene0011986;Unigene0014786;Unigene0017183;Unigene0023338;Unigene0024333;Unigene0030225;Unigene0030807;Unigene0033390;Unigene0033591;Unigene0033607;Unigene0034116;Unigene0035909;Unigene0036221;Unigene0039742;Unigene0040519;Unigene0041412
GO:0006633	fatty acid biosynthetic process	7	28	0.74503	0.872675	Unigene0000252;Unigene0010384;Unigene0012115;Unigene0032990;Unigene0033633;Unigene0034358;Unigene0039874
GO:0015979	photosynthesis	7	28	0.74503	0.872675	Unigene0017109;Unigene0027678;Unigene0029473;Unigene0037800;Unigene0038729;Unigene0039022;Unigene0039874
GO:0055114	oxidation-reduction process	18	69	0.745087	0.872675	Unigene0000341;Unigene0001009;Unigene0013645;Unigene0017003;Unigene0017109;Unigene0018447;Unigene0020478;Unigene0029473;Unigene0031019;Unigene0031517;Unigene0032990;Unigene0036691;Unigene0037800;Unigene0038602;Unigene0038729;Unigene0039220;Unigene0039874;Unigene0039928
GO:0000469	cleavage involved in rRNA processing	1	4	0.746035	0.872675	Unigene0037966
GO:0006354	DNA-templated transcription, elongation	1	4	0.746035	0.872675	Unigene0015655
GO:0006892	post-Golgi vesicle-mediated transport	1	4	0.746035	0.872675	Unigene0012657
GO:0006906	vesicle fusion	1	4	0.746035	0.872675	Unigene0036173
GO:0006914	autophagy	1	4	0.746035	0.872675	Unigene0000054
GO:0007005	mitochondrion organization	1	4	0.746035	0.872675	Unigene0000217
GO:0009640	photomorphogenesis	1	4	0.746035	0.872675	Unigene0023428
GO:0009723	response to ethylene	1	4	0.746035	0.872675	Unigene0038708
GO:0009808	lignin metabolic process	1	4	0.746035	0.872675	Unigene0000814
GO:0009873	ethylene-activated signaling pathway	1	4	0.746035	0.872675	Unigene0038708
GO:0010099	regulation of photomorphogenesis	1	4	0.746035	0.872675	Unigene0023428
GO:0010104	regulation of ethylene-activated signaling pathway	1	4	0.746035	0.872675	Unigene0038708
GO:0010135	ureide metabolic process	1	4	0.746035	0.872675	Unigene0034134
GO:0010506	regulation of autophagy	1	4	0.746035	0.872675	Unigene0000054
GO:0032776	DNA methylation on cytosine	1	4	0.746035	0.872675	Unigene0009226
GO:0032784	regulation of DNA-templated transcription, elongation	1	4	0.746035	0.872675	Unigene0015655
GO:0042545	cell wall modification	1	4	0.746035	0.872675	Unigene0022940
GO:0044801	single-organism membrane fusion	1	4	0.746035	0.872675	Unigene0036173
GO:0046434	organophosphate catabolic process	1	4	0.746035	0.872675	Unigene0031626
GO:0051193	regulation of cofactor metabolic process	1	4	0.746035	0.872675	Unigene0036106
GO:0061025	membrane fusion	1	4	0.746035	0.872675	Unigene0036173
GO:0071214	cellular response to abiotic stimulus	1	4	0.746035	0.872675	Unigene0007955
GO:0071369	cellular response to ethylene stimulus	1	4	0.746035	0.872675	Unigene0038708
GO:0080135	regulation of cellular response to stress	1	4	0.746035	0.872675	Unigene0009203
GO:0090056	regulation of chlorophyll metabolic process	1	4	0.746035	0.872675	Unigene0036106
GO:0090174	organelle membrane fusion	1	4	0.746035	0.872675	Unigene0036173
GO:1901292	nucleoside phosphate catabolic process	1	4	0.746035	0.872675	Unigene0031626
GO:1901401	regulation of tetrapyrrole metabolic process	1	4	0.746035	0.872675	Unigene0036106
GO:2000030	regulation of response to red or far red light	1	4	0.746035	0.872675	Unigene0023428
GO:0018205	peptidyl-lysine modification	24	91	0.746505	0.872675	Unigene0000660;Unigene0000695;Unigene0000938;Unigene0001518;Unigene0002332;Unigene0009707;Unigene0011916;Unigene0012431;Unigene0016772;Unigene0017529;Unigene0021984;Unigene0022473;Unigene0023282;Unigene0024936;Unigene0025487;Unigene0032709;Unigene0033190;Unigene0034255;Unigene0035514;Unigene0038006;Unigene0038166;Unigene0040010;Unigene0040457;Unigene0040965
GO:0050790	regulation of catalytic activity	24	91	0.746505	0.872675	Unigene0000060;Unigene0000101;Unigene0000578;Unigene0000739;Unigene0005141;Unigene0005532;Unigene0008856;Unigene0009203;Unigene0011689;Unigene0014877;Unigene0016079;Unigene0016232;Unigene0017346;Unigene0020026;Unigene0033265;Unigene0035234;Unigene0035857;Unigene0036698;Unigene0036766;Unigene0037777;Unigene0038017;Unigene0039908;Unigene0041247;Unigene0041670
GO:0006342	chromatin silencing	12	47	0.750114	0.87496	Unigene0011489;Unigene0011916;Unigene0012431;Unigene0014931;Unigene0022473;Unigene0024137;Unigene0030425;Unigene0037091;Unigene0037701;Unigene0037750;Unigene0039250;Unigene0039617
GO:0045814	negative regulation of gene expression, epigenetic	12	47	0.750114	0.87496	Unigene0011489;Unigene0011916;Unigene0012431;Unigene0014931;Unigene0022473;Unigene0024137;Unigene0030425;Unigene0037091;Unigene0037701;Unigene0037750;Unigene0039250;Unigene0039617
GO:0006101	citrate metabolic process	8	32	0.751755	0.87496	Unigene0000468;Unigene0006392;Unigene0007580;Unigene0008337;Unigene0013709;Unigene0017663;Unigene0018447;Unigene0031637
GO:0046488	phosphatidylinositol metabolic process	8	32	0.751755	0.87496	Unigene0000054;Unigene0001320;Unigene0006837;Unigene0011670;Unigene0014786;Unigene0034116;Unigene0035909;Unigene0040519
GO:0072350	tricarboxylic acid metabolic process	8	32	0.751755	0.87496	Unigene0000468;Unigene0006392;Unigene0007580;Unigene0008337;Unigene0013709;Unigene0017663;Unigene0018447;Unigene0031637
GO:0022402	cell cycle process	38	142	0.75218	0.87496	Unigene0000054;Unigene0000279;Unigene0000454;Unigene0000677;Unigene0000695;Unigene0002141;Unigene0005002;Unigene0007733;Unigene0007818;Unigene0011541;Unigene0011916;Unigene0012117;Unigene0017346;Unigene0017354;Unigene0017608;Unigene0020441;Unigene0021883;Unigene0022473;Unigene0023311;Unigene0023388;Unigene0024936;Unigene0026572;Unigene0032074;Unigene0032769;Unigene0034255;Unigene0034431;Unigene00…
GO:2000113	negative regulation of cellular macromolecule biosynthetic process	13	51	0.757533	0.879935	Unigene0011489;Unigene0011916;Unigene0012431;Unigene0014931;Unigene0022473;Unigene0024137;Unigene0030425;Unigene0031349;Unigene0037091;Unigene0037701;Unigene0037750;Unigene0039250;Unigene0039617
GO:0009725	response to hormone	63	232	0.757704	0.879935	Unigene0000051;Unigene0001824;Unigene0001952;Unigene0002448;Unigene0002625;Unigene0002943;Unigene0003577;Unigene0003826;Unigene0005002;Unigene0005500;Unigene0009203;Unigene0009348;Unigene0010384;Unigene0010725;Unigene0010952;Unigene0010953;Unigene0011986;Unigene0013636;Unigene0016944;Unigene0017003;Unigene0017613;Unigene0018646;Unigene0019902;Unigene0020866;Unigene0023428;Unigene0023546;Unigene00…
GO:0098771	inorganic ion homeostasis	9	36	0.758402	0.88002	Unigene0002211;Unigene0012001;Unigene0012617;Unigene0023470;Unigene0025775;Unigene0026180;Unigene0026471;Unigene0037972;Unigene0040119
GO:0000278	mitotic cell cycle	17	66	0.761311	0.88267	Unigene0000054;Unigene0000695;Unigene0002141;Unigene0005002;Unigene0007733;Unigene0011916;Unigene0017354;Unigene0020441;Unigene0023388;Unigene0031205;Unigene0032769;Unigene0034255;Unigene0034431;Unigene0034551;Unigene0034666;Unigene0035412;Unigene0041289
GO:0016571	histone methylation	24	92	0.766844	0.888355	Unigene0000660;Unigene0000695;Unigene0002332;Unigene0010611;Unigene0011387;Unigene0011916;Unigene0012431;Unigene0016772;Unigene0019537;Unigene0021984;Unigene0022473;Unigene0024936;Unigene0025487;Unigene0033190;Unigene0033663;Unigene0033958;Unigene0034255;Unigene0035514;Unigene0037740;Unigene0038006;Unigene0040171;Unigene0040330;Unigene0040457;Unigene0040965
GO:0051301	cell division	18	70	0.768265	0.889271	Unigene0000054;Unigene0000695;Unigene0005086;Unigene0011541;Unigene0011916;Unigene0012117;Unigene0017090;Unigene0017354;Unigene0020441;Unigene0022473;Unigene0023388;Unigene0027144;Unigene0032769;Unigene0034255;Unigene0034431;Unigene0034551;Unigene0034666;Unigene0035412
GO:0071554	cell wall organization or biogenesis	33	125	0.770432	0.890741	Unigene0000349;Unigene0000454;Unigene0001518;Unigene0001953;Unigene0003906;Unigene0005067;Unigene0005718;Unigene0006075;Unigene0009707;Unigene0015485;Unigene0016202;Unigene0017090;Unigene0018916;Unigene0020513;Unigene0021851;Unigene0022940;Unigene0024137;Unigene0025372;Unigene0026071;Unigene0027625;Unigene0030772;Unigene0032028;Unigene0032709;Unigene0033617;Unigene0034500;Unigene0034588;Unigene00…
GO:0010243	response to organonitrogen compound	11	44	0.771237	0.890741	Unigene0010189;Unigene0010384;Unigene0013729;Unigene0015731;Unigene0017613;Unigene0018646;Unigene0033086;Unigene0035909;Unigene0038309;Unigene0038945;Unigene0041211
GO:0035556	intracellular signal transduction	36	136	0.772378	0.890741	Unigene0000051;Unigene0000997;Unigene0001320;Unigene0002066;Unigene0002277;Unigene0002625;Unigene0008056;Unigene0008365;Unigene0008612;Unigene0009203;Unigene0010289;Unigene0010296;Unigene0010384;Unigene0012553;Unigene0014786;Unigene0015293;Unigene0015770;Unigene0015956;Unigene0017613;Unigene0018327;Unigene0018646;Unigene0021390;Unigene0021468;Unigene0021833;Unigene0022962;Unigene0023904;Unigene00…
GO:0016129	phytosteroid biosynthetic process	4	17	0.77254	0.890741	Unigene0000248;Unigene0007164;Unigene0010296;Unigene0020277
GO:0016311	dephosphorylation	5	21	0.773422	0.890741	Unigene0002409;Unigene0013182;Unigene0022471;Unigene0033057;Unigene0033171
GO:0044042	glucan metabolic process	44	165	0.773583	0.890741	Unigene0000230;Unigene0001009;Unigene0003051;Unigene0003292;Unigene0003906;Unigene0003971;Unigene0004992;Unigene0005329;Unigene0006727;Unigene0009795;Unigene0010384;Unigene0011679;Unigene0011784;Unigene0011805;Unigene0014466;Unigene0016450;Unigene0017090;Unigene0018725;Unigene0023650;Unigene0023749;Unigene0025710;Unigene0026071;Unigene0027576;Unigene0028401;Unigene0032911;Unigene0034082;Unigene00…
GO:0007126	meiotic nuclear division	3	13	0.775216	0.890741	Unigene0000454;Unigene0000677;Unigene0022473
GO:0009826	unidimensional cell growth	3	13	0.775216	0.890741	Unigene0008948;Unigene0033594;Unigene0033910
GO:0060560	developmental growth involved in morphogenesis	3	13	0.775216	0.890741	Unigene0008948;Unigene0033594;Unigene0033910
GO:0042886	amide transport	6	25	0.776108	0.891041	Unigene0029334;Unigene0032874;Unigene0033715;Unigene0034084;Unigene0037470;Unigene0041182
GO:0009142	nucleoside triphosphate biosynthetic process	7	29	0.77977	0.892082	Unigene0014153;Unigene0024361;Unigene0027249;Unigene0034626;Unigene0038309;Unigene0039874;Unigene0040377
GO:0009199	ribonucleoside triphosphate metabolic process	7	29	0.77977	0.892082	Unigene0014153;Unigene0024361;Unigene0027249;Unigene0034626;Unigene0038309;Unigene0039874;Unigene0040377
GO:0009201	ribonucleoside triphosphate biosynthetic process	7	29	0.77977	0.892082	Unigene0014153;Unigene0024361;Unigene0027249;Unigene0034626;Unigene0038309;Unigene0039874;Unigene0040377
GO:0072330	monocarboxylic acid biosynthetic process	7	29	0.77977	0.892082	Unigene0000252;Unigene0010384;Unigene0012115;Unigene0032990;Unigene0033633;Unigene0034358;Unigene0039874
GO:0044765	single-organism transport	212	761	0.780751	0.892082	Unigene0000048;Unigene0000051;Unigene0000167;Unigene0000231;Unigene0000341;Unigene0000473;Unigene0000679;Unigene0001136;Unigene0001299;Unigene0001424;Unigene0001518;Unigene0001952;Unigene0001953;Unigene0002118;Unigene0002157;Unigene0002667;Unigene0002712;Unigene0003285;Unigene0003292;Unigene0003668;Unigene0003800;Unigene0003897;Unigene0004125;Unigene0004223;Unigene0004417;Unigene0004592;Unigene00…
GO:0005976	polysaccharide metabolic process	68	252	0.784022	0.892082	Unigene0000230;Unigene0000349;Unigene0000454;Unigene0001009;Unigene0001344;Unigene0001518;Unigene0003051;Unigene0003292;Unigene0003466;Unigene0003906;Unigene0003971;Unigene0004992;Unigene0005067;Unigene0005329;Unigene0005718;Unigene0006075;Unigene0006727;Unigene0009795;Unigene0010384;Unigene0011329;Unigene0011679;Unigene0011784;Unigene0011805;Unigene0014466;Unigene0015485;Unigene0015618;Unigene00…
GO:0006875	cellular metal ion homeostasis	2	9	0.785867	0.892082	Unigene0002211;Unigene0012001
GO:0009226	nucleotide-sugar biosynthetic process	2	9	0.785867	0.892082	Unigene0003317;Unigene0038790
GO:0009685	gibberellin metabolic process	2	9	0.785867	0.892082	Unigene0005500;Unigene0017003
GO:0009891	positive regulation of biosynthetic process	2	9	0.785867	0.892082	Unigene0013071;Unigene0015655
GO:0009926	auxin polar transport	2	9	0.785867	0.892082	Unigene0001952;Unigene0005594
GO:0016101	diterpenoid metabolic process	2	9	0.785867	0.892082	Unigene0005500;Unigene0017003
GO:0022618	ribonucleoprotein complex assembly	2	9	0.785867	0.892082	Unigene0029320;Unigene0033206
GO:0071826	ribonucleoprotein complex subunit organization	2	9	0.785867	0.892082	Unigene0029320;Unigene0033206
GO:1902578	single-organism localization	215	774	0.79779	0.904889	Unigene0000048;Unigene0000051;Unigene0000167;Unigene0000217;Unigene0000231;Unigene0000341;Unigene0000473;Unigene0000679;Unigene0000685;Unigene0001136;Unigene0001299;Unigene0001424;Unigene0001518;Unigene0001952;Unigene0001953;Unigene0002118;Unigene0002157;Unigene0002667;Unigene0002712;Unigene0003285;Unigene0003292;Unigene0003668;Unigene0003800;Unigene0003897;Unigene0004125;Unigene0004223;Unigene00…
GO:0010038	response to metal ion	12	49	0.80248	0.908203	Unigene0000341;Unigene0004125;Unigene0012617;Unigene0012835;Unigene0013071;Unigene0016944;Unigene0018646;Unigene0027650;Unigene0033470;Unigene0034248;Unigene0035056;Unigene0036106
GO:0030243	cellulose metabolic process	13	53	0.807123	0.908203	Unigene0000230;Unigene0003051;Unigene0005329;Unigene0009795;Unigene0011784;Unigene0025710;Unigene0028401;Unigene0032911;Unigene0035060;Unigene0036901;Unigene0037900;Unigene0038790;Unigene0039075
GO:0007346	regulation of mitotic cell cycle	6	26	0.809609	0.908203	Unigene0002141;Unigene0007733;Unigene0011916;Unigene0020441;Unigene0032769;Unigene0034666
GO:0009698	phenylpropanoid metabolic process	6	26	0.809609	0.908203	Unigene0000060;Unigene0000814;Unigene0034311;Unigene0038707;Unigene0040783;Unigene0041182
GO:0009799	specification of symmetry	7	30	0.81086	0.908203	Unigene0001952;Unigene0002269;Unigene0011489;Unigene0019902;Unigene0024936;Unigene0030772;Unigene0039250
GO:0009955	adaxial/abaxial pattern specification	4	18	0.812335	0.908203	Unigene0000999;Unigene0002269;Unigene0019902;Unigene0041289
GO:0034762	regulation of transmembrane transport	4	18	0.812335	0.908203	Unigene0001953;Unigene0016944;Unigene0019339;Unigene0030470
GO:0034765	regulation of ion transmembrane transport	4	18	0.812335	0.908203	Unigene0001953;Unigene0016944;Unigene0019339;Unigene0030470
GO:0032506	cytokinetic process	10	42	0.818744	0.908203	Unigene0000054;Unigene0000695;Unigene0011541;Unigene0011916;Unigene0012117;Unigene0017354;Unigene0034255;Unigene0034431;Unigene0034551;Unigene0035412
GO:0006672	ceramide metabolic process	1	5	0.819736	0.908203	Unigene0035179
GO:0006677	glycosylceramide metabolic process	1	5	0.819736	0.908203	Unigene0035179
GO:0006678	glucosylceramide metabolic process	1	5	0.819736	0.908203	Unigene0035179
GO:0006687	glycosphingolipid metabolic process	1	5	0.819736	0.908203	Unigene0035179
GO:0006813	potassium ion transport	1	5	0.819736	0.908203	Unigene0034431
GO:0009902	chloroplast relocation	1	5	0.819736	0.908203	Unigene0002165
GO:0010119	regulation of stomatal movement	1	5	0.819736	0.908203	Unigene0011986
GO:0010431	seed maturation	1	5	0.819736	0.908203	Unigene0036766
GO:0015718	monocarboxylic acid transport	1	5	0.819736	0.908203	Unigene0039767
GO:0019750	chloroplast localization	1	5	0.819736	0.908203	Unigene0002165
GO:0019755	one-carbon compound transport	1	5	0.819736	0.908203	Unigene0034084
GO:0021700	developmental maturation	1	5	0.819736	0.908203	Unigene0036766
GO:0042742	defense response to bacterium	1	5	0.819736	0.908203	Unigene0014931
GO:0050832	defense response to fungus	1	5	0.819736	0.908203	Unigene0039476
GO:0051644	plastid localization	1	5	0.819736	0.908203	Unigene0002165
GO:0051656	establishment of organelle localization	1	5	0.819736	0.908203	Unigene0002165
GO:0051667	establishment of plastid localization	1	5	0.819736	0.908203	Unigene0002165
GO:0060429	epithelium development	1	5	0.819736	0.908203	Unigene0033910
GO:0071804	cellular potassium ion transport	1	5	0.819736	0.908203	Unigene0034431
GO:0071805	potassium ion transmembrane transport	1	5	0.819736	0.908203	Unigene0034431
GO:0006304	DNA modification	16	65	0.820588	0.908203	Unigene0002332;Unigene0007450;Unigene0009226;Unigene0011489;Unigene0011916;Unigene0012431;Unigene0016772;Unigene0021984;Unigene0022473;Unigene0023647;Unigene0024936;Unigene0026572;Unigene0027780;Unigene0034255;Unigene0037750;Unigene0038886
GO:0016310	phosphorylation	56	212	0.820665	0.908203	Unigene0000048;Unigene0000051;Unigene0000101;Unigene0000739;Unigene0002542;Unigene0002611;Unigene0002625;Unigene0002667;Unigene0003292;Unigene0005532;Unigene0008856;Unigene0009203;Unigene0011689;Unigene0011715;Unigene0014823;Unigene0014877;Unigene0015408;Unigene0016944;Unigene0017346;Unigene0017692;Unigene0020287;Unigene0020357;Unigene0020913;Unigene0021204;Unigene0022382;Unigene0022502;Unigene00…
GO:0006818	hydrogen transport	17	69	0.824887	0.91216	Unigene0000231;Unigene0000679;Unigene0013645;Unigene0014153;Unigene0015332;Unigene0017400;Unigene0018036;Unigene0021522;Unigene0024361;Unigene0024579;Unigene0026471;Unigene0027249;Unigene0036385;Unigene0036631;Unigene0038309;Unigene0039874;Unigene0039887
GO:0032259	methylation	35	136	0.826856	0.913621	Unigene0000079;Unigene0000660;Unigene0000695;Unigene0002332;Unigene0002808;Unigene0007482;Unigene0009226;Unigene0010051;Unigene0010611;Unigene0010986;Unigene0011387;Unigene0011916;Unigene0012431;Unigene0014337;Unigene0016201;Unigene0016772;Unigene0019537;Unigene0021984;Unigene0022473;Unigene0024936;Unigene0025487;Unigene0026125;Unigene0033190;Unigene0033663;Unigene0033958;Unigene0033968;Unigene00…
GO:0015711	organic anion transport	18	73	0.829084	0.91465	Unigene0000167;Unigene0004125;Unigene0004223;Unigene0006813;Unigene0007571;Unigene0009508;Unigene0012697;Unigene0015731;Unigene0021522;Unigene0023470;Unigene0024579;Unigene0027427;Unigene0030805;Unigene0032780;Unigene0033910;Unigene0037826;Unigene0039767;Unigene0041856
GO:0048523	negative regulation of cellular process	18	73	0.829084	0.91465	Unigene0011489;Unigene0011916;Unigene0012431;Unigene0014931;Unigene0022473;Unigene0024137;Unigene0026080;Unigene0030425;Unigene0031349;Unigene0032769;Unigene0036698;Unigene0037091;Unigene0037701;Unigene0037750;Unigene0039250;Unigene0039617;Unigene0040646;Unigene0042111
GO:0009738	abscisic acid-activated signaling pathway	2	10	0.834747	0.916598	Unigene0011986;Unigene0036766
GO:0009813	flavonoid biosynthetic process	2	10	0.834747	0.916598	Unigene0002448;Unigene0010746
GO:0015696	ammonium transport	2	10	0.834747	0.916598	Unigene0023876;Unigene0023877
GO:0071215	cellular response to abscisic acid stimulus	2	10	0.834747	0.916598	Unigene0011986;Unigene0036766
GO:0071900	regulation of protein serine/threonine kinase activity	2	10	0.834747	0.916598	Unigene0009203;Unigene0017346
GO:0097306	cellular response to alcohol	2	10	0.834747	0.916598	Unigene0011986;Unigene0036766
GO:0043414	macromolecule methylation	34	133	0.836009	0.917269	Unigene0000079;Unigene0000660;Unigene0000695;Unigene0002332;Unigene0002808;Unigene0007482;Unigene0009226;Unigene0010611;Unigene0010986;Unigene0011387;Unigene0011916;Unigene0012431;Unigene0014337;Unigene0016201;Unigene0016772;Unigene0019537;Unigene0021984;Unigene0022473;Unigene0024936;Unigene0025487;Unigene0026125;Unigene0033190;Unigene0033663;Unigene0033958;Unigene0033968;Unigene0034255;Unigene00…
GO:0030003	cellular cation homeostasis	5	23	0.841318	0.922377	Unigene0002211;Unigene0012001;Unigene0023470;Unigene0026180;Unigene0034500
GO:0006468	protein phosphorylation	42	163	0.843387	0.923928	Unigene0000048;Unigene0000051;Unigene0000101;Unigene0000739;Unigene0002542;Unigene0002625;Unigene0002667;Unigene0003292;Unigene0005532;Unigene0008856;Unigene0009203;Unigene0011689;Unigene0014877;Unigene0016944;Unigene0017346;Unigene0020287;Unigene0021204;Unigene0022382;Unigene0022502;Unigene0024522;Unigene0025235;Unigene0027094;Unigene0031615;Unigene0031751;Unigene0033265;Unigene0033594;Unigene00…
GO:0016128	phytosteroid metabolic process	4	19	0.84623	0.925605	Unigene0000248;Unigene0007164;Unigene0010296;Unigene0020277
GO:0071669	plant-type cell wall organization or biogenesis	4	19	0.84623	0.925605	Unigene0001953;Unigene0005067;Unigene0009707;Unigene0039767
GO:0008154	actin polymerization or depolymerization	3	15	0.855606	0.935015	Unigene0014407;Unigene0026263;Unigene0035478
GO:0009719	response to endogenous stimulus	68	259	0.856158	0.935015	Unigene0000051;Unigene0001824;Unigene0001952;Unigene0002448;Unigene0002625;Unigene0002943;Unigene0003577;Unigene0003826;Unigene0005002;Unigene0005500;Unigene0009203;Unigene0009348;Unigene0010189;Unigene0010384;Unigene0010725;Unigene0010952;Unigene0010953;Unigene0011986;Unigene0013636;Unigene0013729;Unigene0015731;Unigene0016944;Unigene0017003;Unigene0017613;Unigene0018646;Unigene0019902;Unigene00…
GO:0050793	regulation of developmental process	44	172	0.86172	0.93848	Unigene0000051;Unigene0000054;Unigene0000999;Unigene0001824;Unigene0002141;Unigene0002207;Unigene0004483;Unigene0005594;Unigene0007164;Unigene0008378;Unigene0011387;Unigene0011916;Unigene0012431;Unigene0015770;Unigene0017090;Unigene0019537;Unigene0021390;Unigene0022435;Unigene0022473;Unigene0023428;Unigene0023647;Unigene0023749;Unigene0024936;Unigene0025179;Unigene0025372;Unigene0027212;Unigene00…
GO:0006793	phosphorus metabolic process	393	1411	0.861892	0.93848	Unigene0000048;Unigene0000051;Unigene0000054;Unigene0000099;Unigene0000101;Unigene0000168;Unigene0000229;Unigene0000236;Unigene0000248;Unigene0000338;Unigene0000340;Unigene0000442;Unigene0000473;Unigene0000479;Unigene0000532;Unigene0000739;Unigene0000786;Unigene0000833;Unigene0000923;Unigene0000978;Unigene0001011;Unigene0001320;Unigene0001353;Unigene0001505;Unigene0001674;Unigene0001701;Unigene00…
GO:0015698	inorganic anion transport	13	56	0.866944	0.93848	Unigene0000051;Unigene0005187;Unigene0007282;Unigene0018387;Unigene0018646;Unigene0022480;Unigene0022940;Unigene0025994;Unigene0030470;Unigene0032285;Unigene0036880;Unigene0039767;Unigene0041640
GO:0009914	hormone transport	5	24	0.868415	0.93848	Unigene0001952;Unigene0005594;Unigene0017090;Unigene0019902;Unigene0033910
GO:0060918	auxin transport	5	24	0.868415	0.93848	Unigene0001952;Unigene0005594;Unigene0017090;Unigene0019902;Unigene0033910
GO:0006305	DNA alkylation	15	64	0.870806	0.93848	Unigene0002332;Unigene0007450;Unigene0009226;Unigene0011489;Unigene0011916;Unigene0012431;Unigene0016772;Unigene0021984;Unigene0022473;Unigene0023647;Unigene0024936;Unigene0026572;Unigene0027780;Unigene0034255;Unigene0037750
GO:0031324	negative regulation of cellular metabolic process	15	64	0.870806	0.93848	Unigene0011489;Unigene0011916;Unigene0012431;Unigene0014931;Unigene0022473;Unigene0024137;Unigene0030425;Unigene0031349;Unigene0036698;Unigene0037091;Unigene0037701;Unigene0037750;Unigene0039250;Unigene0039617;Unigene0042111
GO:0006928	movement of cell or subcellular component	1	6	0.872056	0.93848	Unigene0026743
GO:0008643	carbohydrate transport	1	6	0.872056	0.93848	Unigene0016475
GO:0010565	regulation of cellular ketone metabolic process	1	6	0.872056	0.93848	Unigene0041211
GO:0042126	nitrate metabolic process	1	6	0.872056	0.93848	Unigene0005187
GO:0045165	cell fate commitment	1	6	0.872056	0.93848	Unigene0034500
GO:0046916	cellular transition metal ion homeostasis	1	6	0.872056	0.93848	Unigene0012001
GO:0070297	regulation of phosphorelay signal transduction system	1	6	0.872056	0.93848	Unigene0038708
GO:2001057	reactive nitrogen species metabolic process	1	6	0.872056	0.93848	Unigene0005187
GO:0034968	histone lysine methylation	16	68	0.872897	0.93848	Unigene0000660;Unigene0000695;Unigene0002332;Unigene0011916;Unigene0012431;Unigene0016772;Unigene0021984;Unigene0022473;Unigene0024936;Unigene0025487;Unigene0033190;Unigene0034255;Unigene0035514;Unigene0038006;Unigene0040457;Unigene0040965
GO:0009636	response to toxic substance	2	11	0.873299	0.93848	Unigene0035164;Unigene0037349
GO:0042440	pigment metabolic process	2	11	0.873299	0.93848	Unigene0002448;Unigene0009156
GO:0046148	pigment biosynthetic process	2	11	0.873299	0.93848	Unigene0002448;Unigene0009156
GO:0052646	alditol phosphate metabolic process	2	11	0.873299	0.93848	Unigene0006746;Unigene0024333
GO:1901264	carbohydrate derivative transport	2	11	0.873299	0.93848	Unigene0002118;Unigene0035886
GO:0006865	amino acid transport	4	20	0.874797	0.938661	Unigene0006813;Unigene0023470;Unigene0032780;Unigene0033910
GO:0007568	aging	4	20	0.874797	0.938661	Unigene0001824;Unigene0034667;Unigene0037750;Unigene0039668
GO:0051234	establishment of localization	338	1222	0.87816	0.941553	Unigene0000020;Unigene0000048;Unigene0000051;Unigene0000076;Unigene0000167;Unigene0000230;Unigene0000231;Unigene0000265;Unigene0000341;Unigene0000473;Unigene0000474;Unigene0000485;Unigene0000544;Unigene0000679;Unigene0000685;Unigene0000695;Unigene0000720;Unigene0000999;Unigene0001129;Unigene0001136;Unigene0001294;Unigene0001299;Unigene0001424;Unigene0001498;Unigene0001518;Unigene0001952;Unigene00…
GO:0000910	cytokinesis	11	49	0.88156	0.944481	Unigene0000054;Unigene0000695;Unigene0011541;Unigene0011916;Unigene0012117;Unigene0017354;Unigene0023388;Unigene0034255;Unigene0034431;Unigene0034551;Unigene0035412
GO:1903047	mitotic cell cycle process	14	61	0.884484	0.946895	Unigene0000054;Unigene0000695;Unigene0002141;Unigene0007733;Unigene0011916;Unigene0017354;Unigene0020441;Unigene0023388;Unigene0032769;Unigene0034255;Unigene0034431;Unigene0034551;Unigene0034666;Unigene0035412
GO:0046471	phosphatidylglycerol metabolic process	3	16	0.88543	0.947188	Unigene0003971;Unigene0010384;Unigene0033607
GO:0006796	phosphate-containing compound metabolic process	386	1393	0.887101	0.947848	Unigene0000048;Unigene0000051;Unigene0000054;Unigene0000099;Unigene0000101;Unigene0000168;Unigene0000229;Unigene0000236;Unigene0000338;Unigene0000340;Unigene0000442;Unigene0000473;Unigene0000479;Unigene0000532;Unigene0000739;Unigene0000786;Unigene0000833;Unigene0000923;Unigene0000978;Unigene0001011;Unigene0001320;Unigene0001353;Unigene0001505;Unigene0001674;Unigene0001701;Unigene0002107;Unigene00…
GO:0018022	peptidyl-lysine methylation	16	69	0.88739	0.947848	Unigene0000660;Unigene0000695;Unigene0002332;Unigene0011916;Unigene0012431;Unigene0016772;Unigene0021984;Unigene0022473;Unigene0024936;Unigene0025487;Unigene0033190;Unigene0034255;Unigene0035514;Unigene0038006;Unigene0040457;Unigene0040965
GO:0022900	electron transport chain	9	42	0.898472	0.958425	Unigene0013645;Unigene0017109;Unigene0018447;Unigene0029473;Unigene0031019;Unigene0031517;Unigene0037800;Unigene0038729;Unigene0039874
GO:0006862	nucleotide transport	4	21	0.89865	0.958425	Unigene0004223;Unigene0021522;Unigene0024579;Unigene0036385
GO:1902410	mitotic cytokinetic process	8	38	0.899945	0.958532	Unigene0000054;Unigene0000695;Unigene0011916;Unigene0017354;Unigene0034255;Unigene0034431;Unigene0034551;Unigene0035412
GO:0071555	cell wall organization	16	70	0.900528	0.958532	Unigene0000349;Unigene0001953;Unigene0003906;Unigene0005718;Unigene0016202;Unigene0017090;Unigene0021851;Unigene0022940;Unigene0025372;Unigene0030772;Unigene0032028;Unigene0034588;Unigene0036294;Unigene0039003;Unigene0039767;Unigene0039928
GO:0000041	transition metal ion transport	7	34	0.9023	0.958532	Unigene0003285;Unigene0006926;Unigene0007282;Unigene0012001;Unigene0020408;Unigene0035528;Unigene0039625
GO:0007166	cell surface receptor signaling pathway	7	34	0.9023	0.958532	Unigene0003160;Unigene0009896;Unigene0013729;Unigene0031929;Unigene0036766;Unigene0040575;Unigene0041670
GO:0045229	external encapsulating structure organization	35	143	0.904514	0.958532	Unigene0000054;Unigene0000349;Unigene0000922;Unigene0001953;Unigene0003545;Unigene0003906;Unigene0004604;Unigene0005514;Unigene0005718;Unigene0010746;Unigene0011916;Unigene0016202;Unigene0017090;Unigene0017529;Unigene0021851;Unigene0022940;Unigene0024579;Unigene0024936;Unigene0025372;Unigene0030146;Unigene0030772;Unigene0032028;Unigene0033594;Unigene0033910;Unigene0034399;Unigene0034588;Unigene00…
GO:0000154	rRNA modification	1	7	0.909195	0.958532	Unigene0033909
GO:0000165	MAPK cascade	1	7	0.909195	0.958532	Unigene0009203
GO:0005985	sucrose metabolic process	1	7	0.909195	0.958532	Unigene0038914
GO:0006553	lysine metabolic process	1	7	0.909195	0.958532	Unigene0039947
GO:0009085	lysine biosynthetic process	1	7	0.909195	0.958532	Unigene0039947
GO:0023014	signal transduction by protein phosphorylation	1	7	0.909195	0.958532	Unigene0009203
GO:0043405	regulation of MAP kinase activity	1	7	0.909195	0.958532	Unigene0009203
GO:0043408	regulation of MAPK cascade	1	7	0.909195	0.958532	Unigene0009203
GO:0051093	negative regulation of developmental process	1	7	0.909195	0.958532	Unigene0031751
GO:0051181	cofactor transport	1	7	0.909195	0.958532	Unigene0036340
GO:0009943	adaxial/abaxial axis specification	3	17	0.90962	0.958532	Unigene0000999;Unigene0002269;Unigene0019902
GO:0015992	proton transport	11	51	0.911421	0.959713	Unigene0000231;Unigene0000679;Unigene0013645;Unigene0014153;Unigene0015332;Unigene0017400;Unigene0018036;Unigene0026471;Unigene0027249;Unigene0036631;Unigene0039887
GO:0010646	regulation of cell communication	9	43	0.913447	0.961129	Unigene0009203;Unigene0011011;Unigene0011625;Unigene0011986;Unigene0026080;Unigene0036766;Unigene0037364;Unigene0038708;Unigene0041670
GO:0000281	mitotic cytokinesis	8	39	0.915373	0.962437	Unigene0000054;Unigene0000695;Unigene0011916;Unigene0017354;Unigene0034255;Unigene0034431;Unigene0034551;Unigene0035412
GO:0007017	microtubule-based process	30	126	0.920651	0.967266	Unigene0000708;Unigene0001702;Unigene0002165;Unigene0002708;Unigene0003903;Unigene0006279;Unigene0007164;Unigene0012431;Unigene0017529;Unigene0017685;Unigene0018898;Unigene0022382;Unigene0022592;Unigene0023388;Unigene0025372;Unigene0033460;Unigene0033617;Unigene0033648;Unigene0034255;Unigene0034551;Unigene0034972;Unigene0036651;Unigene0036875;Unigene0038017;Unigene0038609;Unigene0039089;Unigene00…
GO:0015672	monovalent inorganic cation transport	17	76	0.923506	0.969239	Unigene0000231;Unigene0000679;Unigene0013645;Unigene0014153;Unigene0015332;Unigene0017400;Unigene0018036;Unigene0023470;Unigene0023876;Unigene0023877;Unigene0026471;Unigene0027249;Unigene0032780;Unigene0034431;Unigene0036631;Unigene0037972;Unigene0039887
GO:0006812	cation transport	73	287	0.924242	0.969239	Unigene0000048;Unigene0000167;Unigene0000231;Unigene0000679;Unigene0001136;Unigene0001299;Unigene0003285;Unigene0003668;Unigene0003897;Unigene0004782;Unigene0006637;Unigene0006926;Unigene0007282;Unigene0008612;Unigene0008948;Unigene0009534;Unigene0011417;Unigene0012001;Unigene0013071;Unigene0013422;Unigene0013645;Unigene0013676;Unigene0013729;Unigene0014153;Unigene0015332;Unigene0016132;Unigene00…
GO:0051052	regulation of DNA metabolic process	9	44	0.926499	0.969239	Unigene0000341;Unigene0002141;Unigene0011916;Unigene0016772;Unigene0022473;Unigene0025487;Unigene0026572;Unigene0040885;Unigene0041963
GO:0009737	response to abscisic acid	2	13	0.926705	0.969239	Unigene0011986;Unigene0036766
GO:0097305	response to alcohol	2	13	0.926705	0.969239	Unigene0011986;Unigene0036766
GO:0009966	regulation of signal transduction	5	27	0.927337	0.969239	Unigene0009203;Unigene0011986;Unigene0026080;Unigene0036766;Unigene0038708
GO:0023051	regulation of signaling	5	27	0.927337	0.969239	Unigene0009203;Unigene0011986;Unigene0026080;Unigene0036766;Unigene0038708
GO:0010466	negative regulation of peptidase activity	1	8	0.935557	0.974941	Unigene0036698
GO:0030162	regulation of proteolysis	1	8	0.935557	0.974941	Unigene0036698
GO:0045861	negative regulation of proteolysis	1	8	0.935557	0.974941	Unigene0036698
GO:0052547	regulation of peptidase activity	1	8	0.935557	0.974941	Unigene0036698
GO:0009798	axis specification	3	19	0.944611	0.981491	Unigene0000999;Unigene0002269;Unigene0019902
GO:0009664	plant-type cell wall organization	2	14	0.944624	0.981491	Unigene0001953;Unigene0039767
GO:0055067	monovalent inorganic cation homeostasis	2	14	0.944624	0.981491	Unigene0026471;Unigene0037972
GO:1902531	regulation of intracellular signal transduction	2	14	0.944624	0.981491	Unigene0009203;Unigene0038708
GO:0006026	aminoglycan catabolic process	1	9	0.954268	0.98514	Unigene0006333
GO:0032507	maintenance of protein location in cell	1	9	0.954268	0.98514	Unigene0000685
GO:0045185	maintenance of protein location	1	9	0.954268	0.98514	Unigene0000685
GO:0051651	maintenance of location in cell	1	9	0.954268	0.98514	Unigene0000685
GO:0061687	detoxification of inorganic compound	1	9	0.954268	0.98514	Unigene0037349
GO:0098754	detoxification	1	9	0.954268	0.98514	Unigene0037349
GO:0006820	anion transport	32	139	0.95442	0.98514	Unigene0000051;Unigene0000167;Unigene0004125;Unigene0004223;Unigene0005187;Unigene0006813;Unigene0007282;Unigene0007571;Unigene0009508;Unigene0012697;Unigene0015731;Unigene0018387;Unigene0018646;Unigene0019339;Unigene0021522;Unigene0022480;Unigene0022940;Unigene0023470;Unigene0024579;Unigene0025994;Unigene0027427;Unigene0030470;Unigene0030805;Unigene0032285;Unigene0032780;Unigene0033031;Unigene00…
GO:0044770	cell cycle phase transition	3	20	0.956931	0.98514	Unigene0002141;Unigene0007733;Unigene0011916
GO:0044772	mitotic cell cycle phase transition	3	20	0.956931	0.98514	Unigene0002141;Unigene0007733;Unigene0011916
GO:1901987	regulation of cell cycle phase transition	3	20	0.956931	0.98514	Unigene0002141;Unigene0007733;Unigene0011916
GO:1901990	regulation of mitotic cell cycle phase transition	3	20	0.956931	0.98514	Unigene0002141;Unigene0007733;Unigene0011916
GO:0006563	L-serine metabolic process	2	15	0.958319	0.98514	Unigene0012835;Unigene0038598
GO:0015893	drug transport	2	15	0.958319	0.98514	Unigene0035014;Unigene0038306
GO:0042493	response to drug	2	15	0.958319	0.98514	Unigene0035014;Unigene0038306
GO:0045333	cellular respiration	4	25	0.958608	0.98514	Unigene0013645;Unigene0018447;Unigene0031517;Unigene0038602
GO:0030001	metal ion transport	43	184	0.965235	0.988567	Unigene0000048;Unigene0000679;Unigene0001299;Unigene0003285;Unigene0003668;Unigene0003897;Unigene0006926;Unigene0007282;Unigene0008948;Unigene0009534;Unigene0012001;Unigene0013071;Unigene0013422;Unigene0013729;Unigene0018036;Unigene0020408;Unigene0021833;Unigene0023470;Unigene0023520;Unigene0025241;Unigene0025480;Unigene0026071;Unigene0026256;Unigene0026471;Unigene0026538;Unigene0031389;Unigene00…
GO:0051336	regulation of hydrolase activity	8	44	0.965437	0.988567	Unigene0000578;Unigene0005141;Unigene0016232;Unigene0020026;Unigene0035857;Unigene0036698;Unigene0036766;Unigene0039908
GO:0061640	cytoskeleton-dependent cytokinesis	8	44	0.965437	0.988567	Unigene0000054;Unigene0000695;Unigene0011916;Unigene0017354;Unigene0034255;Unigene0034431;Unigene0034551;Unigene0035412
GO:0009690	cytokinin metabolic process	1	10	0.967548	0.988567	Unigene0007818
GO:0043086	negative regulation of catalytic activity	1	10	0.967548	0.988567	Unigene0036698
GO:0044092	negative regulation of molecular function	1	10	0.967548	0.988567	Unigene0036698
GO:0051346	negative regulation of hydrolase activity	1	10	0.967548	0.988567	Unigene0036698
GO:1901136	carbohydrate derivative catabolic process	1	10	0.967548	0.988567	Unigene0006333
GO:0015914	phospholipid transport	2	16	0.968732	0.98906	Unigene0000167;Unigene0027427
GO:0015748	organophosphate ester transport	8	45	0.971409	0.991076	Unigene0000167;Unigene0004223;Unigene0021522;Unigene0023470;Unigene0024579;Unigene0027427;Unigene0032780;Unigene0036385
GO:0006811	ion transport	108	431	0.973388	0.992377	Unigene0000048;Unigene0000051;Unigene0000167;Unigene0000231;Unigene0000679;Unigene0001136;Unigene0001299;Unigene0001953;Unigene0002667;Unigene0003285;Unigene0003292;Unigene0003668;Unigene0003897;Unigene0004125;Unigene0004223;Unigene0004782;Unigene0005187;Unigene0006637;Unigene0006813;Unigene0006926;Unigene0007282;Unigene0007571;Unigene0008612;Unigene0008948;Unigene0009508;Unigene0009534;Unigene00…
GO:0006306	DNA methylation	1	11	0.976973	0.992447	Unigene0009226
GO:0007215	glutamate receptor signaling pathway	1	11	0.976973	0.992447	Unigene0013729
GO:0022604	regulation of cell morphogenesis	1	11	0.976973	0.992447	Unigene0038313
GO:0044728	DNA methylation or demethylation	1	11	0.976973	0.992447	Unigene0009226
GO:0048528	post-embryonic root development	1	11	0.976973	0.992447	Unigene0035412
GO:0010087	phloem or xylem histogenesis	2	18	0.982556	0.993464	Unigene0019902;Unigene0040659
GO:0009148	pyrimidine nucleoside triphosphate biosynthetic process	1	12	0.983662	0.993464	Unigene0040377
GO:0009208	pyrimidine ribonucleoside triphosphate metabolic process	1	12	0.983662	0.993464	Unigene0040377
GO:0009209	pyrimidine ribonucleoside triphosphate biosynthetic process	1	12	0.983662	0.993464	Unigene0040377
GO:0022603	regulation of anatomical structure morphogenesis	1	12	0.983662	0.993464	Unigene0038313
GO:0032269	negative regulation of cellular protein metabolic process	1	12	0.983662	0.993464	Unigene0036698
GO:0051248	negative regulation of protein metabolic process	1	12	0.983662	0.993464	Unigene0036698
GO:0006869	lipid transport	3	24	0.984828	0.993464	Unigene0000167;Unigene0027427;Unigene0040860
GO:0010876	lipid localization	3	24	0.984828	0.993464	Unigene0000167;Unigene0027427;Unigene0040860
GO:0048509	regulation of meristem development	9	53	0.98553	0.993464	Unigene0004483;Unigene0007164;Unigene0017090;Unigene0024936;Unigene0025179;Unigene0025372;Unigene0036294;Unigene0039022;Unigene0040049
GO:0051273	beta-glucan metabolic process	14	75	0.985719	0.993464	Unigene0000230;Unigene0003051;Unigene0005329;Unigene0009795;Unigene0011784;Unigene0025710;Unigene0026071;Unigene0028401;Unigene0032911;Unigene0035060;Unigene0036901;Unigene0037900;Unigene0038790;Unigene0039075
GO:0043087	regulation of GTPase activity	4	30	0.987642	0.994691	Unigene0000578;Unigene0016232;Unigene0020026;Unigene0035857
GO:0009147	pyrimidine nucleoside triphosphate metabolic process	1	13	0.988408	0.994753	Unigene0040377
GO:0022904	respiratory electron transport chain	2	20	0.990363	0.99601	Unigene0018447;Unigene0031517
GO:0034728	nucleosome organization	2	23	0.996102	1	Unigene0004712;Unigene0036239
GO:0071824	protein-DNA complex subunit organization	2	24	0.997127	1	Unigene0004712;Unigene0036239
GO:0000272	polysaccharide catabolic process	2	26	0.998446	1	Unigene0000349;Unigene0005718
GO:0016052	carbohydrate catabolic process	2	26	0.998446	1	Unigene0000349;Unigene0005718
GO:0070838	divalent metal ion transport	11	78	0.99942	1	Unigene0001299;Unigene0003897;Unigene0013422;Unigene0013729;Unigene0018036;Unigene0023470;Unigene0025241;Unigene0026071;Unigene0031389;Unigene0034500;Unigene0037441
GO:0072511	divalent inorganic cation transport	11	78	0.99942	1	Unigene0001299;Unigene0003897;Unigene0013422;Unigene0013729;Unigene0018036;Unigene0023470;Unigene0025241;Unigene0026071;Unigene0031389;Unigene0034500;Unigene0037441
GO:0006816	calcium ion transport	2	32	0.999761	1	Unigene0013729;Unigene0034500
GO:0008150	biological_process	2227	7678	1	1	Unigene0000020;Unigene0000048;Unigene0000051;Unigene0000054;Unigene0000059;Unigene0000060;Unigene0000071;Unigene0000075;Unigene0000076;Unigene0000077;Unigene0000079;Unigene0000085;Unigene0000099;Unigene0000101;Unigene0000109;Unigene0000138;Unigene0000144;Unigene0000145;Unigene0000146;Unigene0000148;Unigene0000150;Unigene0000160;Unigene0000163;Unigene0000167;Unigene0000168;Unigene0000169;Unigene00…
Unigene0041499;Unigene0041509;Unigene0041518;Unigene0041531;Unigene0041547;Unigene0041569;Unigene0041570;Unigene0041575;Unigene0041640;Unigene0041658;Unigene0041670;Unigene0041693;Unigene0041729;Unigene0041734;Unigene0041778;Unigene0041788;Unigene0041828;Unigene0041834;Unigene0041838;Unigene0041844;Unigene0041856;Unigene0041857;Unigene0041861;Unigene0041896;Unigene0041926;Unigene0041950;Unigene00…

## Sheet: GP
GO analysis result for single-copy genes in Chaenomeles sinensis(GP)
GO ID	Description	out (2227)	All (7948)	pvalue	p.adjust	Genes
GO:0006807	nitrogen compound metabolic process	589	1538	1.04122e-22	1.49207e-19	Unigene0000015;Unigene0000024;Unigene0000042;Unigene0000092;Unigene0000099;Unigene0000108;Unigene0000116;Unigene0000190;Unigene0000205;Unigene0000226;Unigene0000241;Unigene0000299;Unigene0000343;Unigene0000418;Unigene0000480;Unigene0000525;Unigene0000577;Unigene0000592;Unigene0000613;Unigene0000642;Unigene0000672;Unigene0000695;Unigene0000707;Unigene0000729;Unigene0000747;Unigene0000767;Unigene00…
GO:0046483	heterocycle metabolic process	486	1245	2.84505e-20	1.62742e-17	Unigene0000015;Unigene0000024;Unigene0000042;Unigene0000099;Unigene0000108;Unigene0000190;Unigene0000205;Unigene0000226;Unigene0000241;Unigene0000299;Unigene0000343;Unigene0000418;Unigene0000480;Unigene0000525;Unigene0000577;Unigene0000592;Unigene0000613;Unigene0000642;Unigene0000695;Unigene0000747;Unigene0000767;Unigene0000902;Unigene0000944;Unigene0001041;Unigene0001242;Unigene0001353;Unigene00…
GO:0034641	cellular nitrogen compound metabolic process	505	1305	3.40703e-20	1.62742e-17	Unigene0000015;Unigene0000024;Unigene0000042;Unigene0000099;Unigene0000108;Unigene0000190;Unigene0000205;Unigene0000226;Unigene0000241;Unigene0000299;Unigene0000343;Unigene0000418;Unigene0000480;Unigene0000525;Unigene0000577;Unigene0000592;Unigene0000613;Unigene0000642;Unigene0000695;Unigene0000707;Unigene0000729;Unigene0000747;Unigene0000767;Unigene0000902;Unigene0000944;Unigene0001041;Unigene00…
GO:1901360	organic cyclic compound metabolic process	514	1366	1.29402e-17	4.63584e-15	Unigene0000015;Unigene0000024;Unigene0000042;Unigene0000099;Unigene0000108;Unigene0000190;Unigene0000205;Unigene0000226;Unigene0000241;Unigene0000299;Unigene0000343;Unigene0000418;Unigene0000480;Unigene0000525;Unigene0000577;Unigene0000592;Unigene0000613;Unigene0000642;Unigene0000695;Unigene0000747;Unigene0000767;Unigene0000902;Unigene0000944;Unigene0001041;Unigene0001242;Unigene0001353;Unigene00…
GO:0006725	cellular aromatic compound metabolic process	497	1321	5.78544e-17	1.65811e-14	Unigene0000015;Unigene0000024;Unigene0000042;Unigene0000099;Unigene0000108;Unigene0000190;Unigene0000205;Unigene0000226;Unigene0000241;Unigene0000299;Unigene0000343;Unigene0000418;Unigene0000480;Unigene0000525;Unigene0000577;Unigene0000592;Unigene0000613;Unigene0000642;Unigene0000695;Unigene0000747;Unigene0000767;Unigene0000902;Unigene0000944;Unigene0001041;Unigene0001242;Unigene0001353;Unigene00…
GO:0006139	nucleobase-containing compound metabolic process	428	1117	5.07772e-16	1.21273e-13	Unigene0000015;Unigene0000024;Unigene0000042;Unigene0000099;Unigene0000108;Unigene0000190;Unigene0000205;Unigene0000226;Unigene0000241;Unigene0000299;Unigene0000343;Unigene0000418;Unigene0000480;Unigene0000525;Unigene0000577;Unigene0000592;Unigene0000613;Unigene0000642;Unigene0000695;Unigene0000747;Unigene0000767;Unigene0000902;Unigene0000944;Unigene0001041;Unigene0001242;Unigene0001473;Unigene00…
GO:0090304	nucleic acid metabolic process	359	924	2.15013e-14	4.40162e-12	Unigene0000015;Unigene0000024;Unigene0000042;Unigene0000099;Unigene0000190;Unigene0000205;Unigene0000226;Unigene0000241;Unigene0000299;Unigene0000343;Unigene0000418;Unigene0000480;Unigene0000525;Unigene0000577;Unigene0000592;Unigene0000613;Unigene0000642;Unigene0000695;Unigene0000747;Unigene0000767;Unigene0000902;Unigene0001041;Unigene0001242;Unigene0001473;Unigene0001494;Unigene0001508;Unigene00…
GO:1901564	organonitrogen compound metabolic process	283	714	1.39392e-12	2.49687e-10	Unigene0000042;Unigene0000092;Unigene0000116;Unigene0000226;Unigene0000525;Unigene0000613;Unigene0000672;Unigene0000707;Unigene0000729;Unigene0000902;Unigene0001041;Unigene0001353;Unigene0001416;Unigene0001716;Unigene0001722;Unigene0001893;Unigene0002384;Unigene0002418;Unigene0002520;Unigene0002542;Unigene0002702;Unigene0002855;Unigene0002918;Unigene0002922;Unigene0002930;Unigene0003021;Unigene00…
GO:0044281	small molecule metabolic process	393	1056	1.87464e-12	2.98485e-10	Unigene0000042;Unigene0000092;Unigene0000108;Unigene0000116;Unigene0000226;Unigene0000453;Unigene0000498;Unigene0000525;Unigene0000566;Unigene0000569;Unigene0000613;Unigene0000707;Unigene0000902;Unigene0001035;Unigene0001041;Unigene0001149;Unigene0001353;Unigene0001416;Unigene0001588;Unigene0001716;Unigene0001722;Unigene0001759;Unigene0001893;Unigene0001959;Unigene0002384;Unigene0002418;Unigene00…
GO:0044238	primary metabolic process	1186	3745	4.88103e-12	6.99451e-10	Unigene0000015;Unigene0000024;Unigene0000042;Unigene0000043;Unigene0000059;Unigene0000064;Unigene0000069;Unigene0000080;Unigene0000092;Unigene0000098;Unigene0000099;Unigene0000108;Unigene0000116;Unigene0000120;Unigene0000127;Unigene0000133;Unigene0000156;Unigene0000190;Unigene0000205;Unigene0000226;Unigene0000229;Unigene0000233;Unigene0000241;Unigene0000252;Unigene0000265;Unigene0000277;Unigene00…
GO:0016070	RNA metabolic process	248	629	7.8432e-11	1.02175e-08	Unigene0000015;Unigene0000024;Unigene0000042;Unigene0000099;Unigene0000190;Unigene0000205;Unigene0000226;Unigene0000241;Unigene0000343;Unigene0000418;Unigene0000480;Unigene0000525;Unigene0000577;Unigene0000592;Unigene0000613;Unigene0000642;Unigene0000767;Unigene0000902;Unigene0001041;Unigene0001494;Unigene0001508;Unigene0001950;Unigene0002162;Unigene0002229;Unigene0002384;Unigene0002542;Unigene00…
GO:0019752	carboxylic acid metabolic process	275	714	1.26032e-10	1.50504e-08	Unigene0000042;Unigene0000092;Unigene0000116;Unigene0000226;Unigene0000453;Unigene0000498;Unigene0000525;Unigene0000569;Unigene0000613;Unigene0001035;Unigene0001149;Unigene0001353;Unigene0001416;Unigene0001722;Unigene0001759;Unigene0001959;Unigene0002384;Unigene0002536;Unigene0002542;Unigene0002702;Unigene0002710;Unigene0002855;Unigene0002903;Unigene0002922;Unigene0002930;Unigene0003021;Unigene00…
GO:0043436	oxoacid metabolic process	280	735	3.28632e-10	3.62254e-08	Unigene0000042;Unigene0000092;Unigene0000116;Unigene0000226;Unigene0000453;Unigene0000498;Unigene0000525;Unigene0000569;Unigene0000613;Unigene0001035;Unigene0001149;Unigene0001353;Unigene0001416;Unigene0001722;Unigene0001759;Unigene0001959;Unigene0002384;Unigene0002536;Unigene0002542;Unigene0002702;Unigene0002710;Unigene0002855;Unigene0002903;Unigene0002922;Unigene0002930;Unigene0003021;Unigene00…
GO:0006082	organic acid metabolic process	280	736	3.88575e-10	3.97734e-08	Unigene0000042;Unigene0000092;Unigene0000116;Unigene0000226;Unigene0000453;Unigene0000498;Unigene0000525;Unigene0000569;Unigene0000613;Unigene0001035;Unigene0001149;Unigene0001353;Unigene0001416;Unigene0001722;Unigene0001759;Unigene0001959;Unigene0002384;Unigene0002536;Unigene0002542;Unigene0002702;Unigene0002710;Unigene0002855;Unigene0002903;Unigene0002922;Unigene0002930;Unigene0003021;Unigene00…
GO:0044710	single-organism metabolic process	782	2402	2.41825e-09	2.31024e-07	Unigene0000042;Unigene0000043;Unigene0000054;Unigene0000069;Unigene0000083;Unigene0000092;Unigene0000099;Unigene0000108;Unigene0000116;Unigene0000127;Unigene0000156;Unigene0000190;Unigene0000226;Unigene0000233;Unigene0000268;Unigene0000313;Unigene0000324;Unigene0000350;Unigene0000453;Unigene0000482;Unigene0000498;Unigene0000508;Unigene0000525;Unigene0000566;Unigene0000569;Unigene0000613;Unigene00…
GO:0051186	cofactor metabolic process	92	199	2.3461e-08	2.10122e-06	Unigene0001531;Unigene0001716;Unigene0002527;Unigene0002702;Unigene0002922;Unigene0003160;Unigene0004270;Unigene0005121;Unigene0005947;Unigene0006913;Unigene0007350;Unigene0007625;Unigene0007793;Unigene0008058;Unigene0008717;Unigene0008840;Unigene0009466;Unigene0009524;Unigene0010797;Unigene0012304;Unigene0013153;Unigene0014166;Unigene0014439;Unigene0014704;Unigene0014981;Unigene0015626;Unigene00…
GO:1901566	organonitrogen compound biosynthetic process	177	446	2.94905e-08	2.48587e-06	Unigene0000042;Unigene0000092;Unigene0000116;Unigene0000226;Unigene0000525;Unigene0000613;Unigene0000672;Unigene0000707;Unigene0000729;Unigene0001041;Unigene0001416;Unigene0001722;Unigene0002384;Unigene0002418;Unigene0002520;Unigene0002542;Unigene0002855;Unigene0002918;Unigene0002922;Unigene0002930;Unigene0003021;Unigene0003122;Unigene0003149;Unigene0003264;Unigene0003352;Unigene0003432;Unigene00…
GO:0044237	cellular metabolic process	1321	4329	3.23089e-08	2.57215e-06	Unigene0000012;Unigene0000015;Unigene0000024;Unigene0000035;Unigene0000042;Unigene0000059;Unigene0000064;Unigene0000069;Unigene0000092;Unigene0000098;Unigene0000099;Unigene0000108;Unigene0000116;Unigene0000120;Unigene0000127;Unigene0000133;Unigene0000156;Unigene0000157;Unigene0000164;Unigene0000167;Unigene0000190;Unigene0000205;Unigene0000226;Unigene0000229;Unigene0000233;Unigene0000241;Unigene00…
GO:0044248	cellular catabolic process	103	232	4.71133e-08	3.55334e-06	Unigene0000064;Unigene0000099;Unigene0000116;Unigene0000304;Unigene0000498;Unigene0000569;Unigene0001792;Unigene0001893;Unigene0002210;Unigene0002545;Unigene0002702;Unigene0003021;Unigene0003128;Unigene0003416;Unigene0003795;Unigene0004270;Unigene0004558;Unigene0004635;Unigene0004638;Unigene0006935;Unigene0007350;Unigene0007694;Unigene0008075;Unigene0008149;Unigene0008585;Unigene0009026;Unigene00…
GO:0044271	cellular nitrogen compound biosynthetic process	211	558	1.26006e-07	9.02836e-06	Unigene0000015;Unigene0000024;Unigene0000099;Unigene0000205;Unigene0000226;Unigene0000241;Unigene0000343;Unigene0000525;Unigene0000577;Unigene0000613;Unigene0000642;Unigene0000729;Unigene0000767;Unigene0001041;Unigene0002162;Unigene0002229;Unigene0002384;Unigene0002418;Unigene0002520;Unigene0002524;Unigene0002542;Unigene0002918;Unigene0002922;Unigene0002930;Unigene0003120;Unigene0003122;Unigene00…
GO:0033013	tetrapyrrole metabolic process	44	79	1.95855e-07	1.33648e-05	Unigene0002922;Unigene0004270;Unigene0004703;Unigene0005121;Unigene0006913;Unigene0007350;Unigene0007793;Unigene0008058;Unigene0009466;Unigene0013153;Unigene0014439;Unigene0014704;Unigene0014981;Unigene0015626;Unigene0017359;Unigene0020407;Unigene0020980;Unigene0021522;Unigene0021911;Unigene0022868;Unigene0024972;Unigene0026435;Unigene0030199;Unigene0032313;Unigene0032327;Unigene0032499;Unigene00…
GO:0006778	porphyrin-containing compound metabolic process	43	78	3.96754e-07	2.58431e-05	Unigene0002922;Unigene0004270;Unigene0005121;Unigene0006913;Unigene0007350;Unigene0007793;Unigene0008058;Unigene0009466;Unigene0013153;Unigene0014439;Unigene0014704;Unigene0014981;Unigene0015626;Unigene0017359;Unigene0020407;Unigene0020980;Unigene0021522;Unigene0021911;Unigene0022868;Unigene0024972;Unigene0026435;Unigene0030199;Unigene0032313;Unigene0032327;Unigene0032499;Unigene0033296;Unigene00…
GO:1901361	organic cyclic compound catabolic process	28	43	4.2576e-07	2.65267e-05	Unigene0001893;Unigene0003021;Unigene0006935;Unigene0007350;Unigene0008585;Unigene0014439;Unigene0019564;Unigene0021522;Unigene0022699;Unigene0024972;Unigene0026535;Unigene0029425;Unigene0033296;Unigene0034154;Unigene0034792;Unigene0035534;Unigene0035579;Unigene0036371;Unigene0037527;Unigene0037539;Unigene0037689;Unigene0038223;Unigene0039228;Unigene0039611;Unigene0040055;Unigene0040250;Unigene00…
GO:0044711	single-organism biosynthetic process	196	520	4.77919e-07	2.85357e-05	Unigene0000042;Unigene0000092;Unigene0000099;Unigene0000116;Unigene0000672;Unigene0000707;Unigene0001041;Unigene0001265;Unigene0001416;Unigene0001722;Unigene0001792;Unigene0001883;Unigene0002418;Unigene0002452;Unigene0002536;Unigene0002542;Unigene0002794;Unigene0002855;Unigene0002918;Unigene0002930;Unigene0003005;Unigene0003021;Unigene0003120;Unigene0003122;Unigene0003149;Unigene0003241;Unigene00…
GO:1901575	organic substance catabolic process	111	266	7.1943e-07	4.12377e-05	Unigene0000064;Unigene0000116;Unigene0000304;Unigene0000498;Unigene0000569;Unigene0001792;Unigene0001893;Unigene0002210;Unigene0002280;Unigene0002702;Unigene0003021;Unigene0003128;Unigene0003416;Unigene0003795;Unigene0004270;Unigene0004558;Unigene0004635;Unigene0004638;Unigene0006836;Unigene0006935;Unigene0007350;Unigene0007694;Unigene0008075;Unigene0008149;Unigene0008585;Unigene0009026;Unigene00…
GO:0034660	ncRNA metabolic process	87	198	8.98967e-07	4.7804e-05	Unigene0000099;Unigene0000226;Unigene0000480;Unigene0000525;Unigene0000613;Unigene0000902;Unigene0001041;Unigene0001950;Unigene0002384;Unigene0002542;Unigene0002922;Unigene0003083;Unigene0003596;Unigene0004141;Unigene0004781;Unigene0005060;Unigene0005121;Unigene0005515;Unigene0005888;Unigene0006336;Unigene0006968;Unigene0007786;Unigene0008429;Unigene0008717;Unigene0008787;Unigene0009025;Unigene00…
GO:0006996	organelle organization	220	599	9.00704e-07	4.7804e-05	Unigene0000024;Unigene0000069;Unigene0000097;Unigene0000099;Unigene0000116;Unigene0000213;Unigene0000233;Unigene0000324;Unigene0000498;Unigene0000569;Unigene0000592;Unigene0000660;Unigene0000695;Unigene0000935;Unigene0001351;Unigene0001844;Unigene0001959;Unigene0002004;Unigene0002162;Unigene0002229;Unigene0002415;Unigene0002497;Unigene0002922;Unigene0002930;Unigene0003120;Unigene0003128;Unigene00…
GO:0044270	cellular nitrogen compound catabolic process	27	42	1.00478e-06	4.87171e-05	Unigene0001893;Unigene0003021;Unigene0006935;Unigene0007350;Unigene0008585;Unigene0014439;Unigene0019564;Unigene0021522;Unigene0022699;Unigene0024972;Unigene0026535;Unigene0029425;Unigene0033296;Unigene0034154;Unigene0034792;Unigene0035534;Unigene0035579;Unigene0037527;Unigene0037539;Unigene0037689;Unigene0038223;Unigene0039228;Unigene0039611;Unigene0040055;Unigene0040250;Unigene0041654;Unigene00…
GO:0046700	heterocycle catabolic process	27	42	1.00478e-06	4.87171e-05	Unigene0001893;Unigene0003021;Unigene0006935;Unigene0007350;Unigene0008585;Unigene0014439;Unigene0019564;Unigene0021522;Unigene0022699;Unigene0024972;Unigene0026535;Unigene0029425;Unigene0033296;Unigene0034154;Unigene0034792;Unigene0035534;Unigene0035579;Unigene0037527;Unigene0037539;Unigene0037689;Unigene0038223;Unigene0039228;Unigene0039611;Unigene0040055;Unigene0040250;Unigene0041654;Unigene00…
GO:0009416	response to light stimulus	97	227	1.0199e-06	4.87171e-05	Unigene0000108;Unigene0000119;Unigene0000498;Unigene0000667;Unigene0001210;Unigene0001498;Unigene0001567;Unigene0001677;Unigene0001792;Unigene0002027;Unigene0002162;Unigene0002229;Unigene0002264;Unigene0002542;Unigene0002682;Unigene0003021;Unigene0003160;Unigene0003363;Unigene0003419;Unigene0004171;Unigene0004270;Unigene0004284;Unigene0004397;Unigene0004398;Unigene0004558;Unigene0006211;Unigene00…
GO:0019439	aromatic compound catabolic process	25	38	1.34354e-06	6.21061e-05	Unigene0003021;Unigene0006935;Unigene0007350;Unigene0008585;Unigene0014439;Unigene0019564;Unigene0021522;Unigene0022699;Unigene0024972;Unigene0026535;Unigene0029425;Unigene0033296;Unigene0034154;Unigene0034792;Unigene0035534;Unigene0035579;Unigene0037527;Unigene0037539;Unigene0037689;Unigene0038223;Unigene0039228;Unigene0039611;Unigene0040055;Unigene0040250;Unigene0042591
GO:0009056	catabolic process	116	285	1.82215e-06	8.15981e-05	Unigene0000064;Unigene0000099;Unigene0000116;Unigene0000304;Unigene0000498;Unigene0000569;Unigene0001792;Unigene0001893;Unigene0002210;Unigene0002280;Unigene0002545;Unigene0002702;Unigene0003021;Unigene0003128;Unigene0003416;Unigene0003795;Unigene0004270;Unigene0004558;Unigene0004635;Unigene0004638;Unigene0006836;Unigene0006935;Unigene0007350;Unigene0007694;Unigene0008075;Unigene0008149;Unigene00…
GO:0044763	single-organism cellular process	900	2893	2.15497e-06	9.3578e-05	Unigene0000024;Unigene0000035;Unigene0000042;Unigene0000069;Unigene0000092;Unigene0000097;Unigene0000099;Unigene0000108;Unigene0000116;Unigene0000119;Unigene0000120;Unigene0000156;Unigene0000190;Unigene0000226;Unigene0000229;Unigene0000233;Unigene0000265;Unigene0000324;Unigene0000350;Unigene0000381;Unigene0000453;Unigene0000498;Unigene0000508;Unigene0000525;Unigene0000550;Unigene0000566;Unigene00…
GO:0032787	monocarboxylic acid metabolic process	141	361	2.2974e-06	9.68285e-05	Unigene0000092;Unigene0000498;Unigene0000569;Unigene0001035;Unigene0001353;Unigene0001759;Unigene0001959;Unigene0002536;Unigene0002542;Unigene0002903;Unigene0002922;Unigene0002930;Unigene0003128;Unigene0003416;Unigene0003795;Unigene0004270;Unigene0004291;Unigene0004558;Unigene0004638;Unigene0004644;Unigene0004967;Unigene0005121;Unigene0005174;Unigene0005443;Unigene0005947;Unigene0006359;Unigene00…
GO:0071704	organic substance metabolic process	1421	4757	3.7375e-06	0.000153024	Unigene0000012;Unigene0000015;Unigene0000024;Unigene0000035;Unigene0000042;Unigene0000043;Unigene0000059;Unigene0000064;Unigene0000069;Unigene0000092;Unigene0000098;Unigene0000099;Unigene0000102;Unigene0000108;Unigene0000116;Unigene0000120;Unigene0000127;Unigene0000133;Unigene0000156;Unigene0000164;Unigene0000190;Unigene0000205;Unigene0000226;Unigene0000229;Unigene0000233;Unigene0000241;Unigene00…
GO:0006787	porphyrin-containing compound catabolic process	14	17	4.91998e-06	0.000185535	Unigene0007350;Unigene0014439;Unigene0021522;Unigene0024972;Unigene0033296;Unigene0034154;Unigene0034792;Unigene0035534;Unigene0035579;Unigene0037689;Unigene0039228;Unigene0039611;Unigene0040055;Unigene0042591
GO:0033015	tetrapyrrole catabolic process	14	17	4.91998e-06	0.000185535	Unigene0007350;Unigene0014439;Unigene0021522;Unigene0024972;Unigene0033296;Unigene0034154;Unigene0034792;Unigene0035534;Unigene0035579;Unigene0037689;Unigene0039228;Unigene0039611;Unigene0040055;Unigene0042591
GO:0051187	cofactor catabolic process	14	17	4.91998e-06	0.000185535	Unigene0007350;Unigene0014439;Unigene0021522;Unigene0024972;Unigene0033296;Unigene0034154;Unigene0034792;Unigene0035534;Unigene0035579;Unigene0037689;Unigene0039228;Unigene0039611;Unigene0040055;Unigene0042591
GO:0071840	cellular component organization or biogenesis	337	990	5.39491e-06	0.000198228	Unigene0000024;Unigene0000042;Unigene0000069;Unigene0000097;Unigene0000099;Unigene0000108;Unigene0000116;Unigene0000164;Unigene0000213;Unigene0000233;Unigene0000324;Unigene0000480;Unigene0000498;Unigene0000550;Unigene0000569;Unigene0000592;Unigene0000660;Unigene0000667;Unigene0000695;Unigene0000935;Unigene0001283;Unigene0001351;Unigene0001677;Unigene0001690;Unigene0001792;Unigene0001844;Unigene00…
GO:0006520	cellular amino acid metabolic process	130	333	5.90566e-06	0.00021157	Unigene0000042;Unigene0000092;Unigene0000116;Unigene0000226;Unigene0000525;Unigene0000613;Unigene0001353;Unigene0001416;Unigene0001722;Unigene0002384;Unigene0002702;Unigene0002855;Unigene0003021;Unigene0003122;Unigene0003149;Unigene0003352;Unigene0003432;Unigene0003596;Unigene0003978;Unigene0004141;Unigene0004270;Unigene0004419;Unigene0004584;Unigene0004585;Unigene0004781;Unigene0004967;Unigene00…
GO:0009314	response to radiation	100	244	6.58525e-06	0.000226593	Unigene0000108;Unigene0000119;Unigene0000498;Unigene0000667;Unigene0001210;Unigene0001498;Unigene0001567;Unigene0001677;Unigene0001792;Unigene0001924;Unigene0002027;Unigene0002162;Unigene0002229;Unigene0002264;Unigene0002542;Unigene0002682;Unigene0003021;Unigene0003160;Unigene0003363;Unigene0003419;Unigene0004171;Unigene0004270;Unigene0004284;Unigene0004397;Unigene0004398;Unigene0004558;Unigene00…
GO:0018130	heterocycle biosynthetic process	165	441	6.68793e-06	0.000226593	Unigene0000015;Unigene0000024;Unigene0000099;Unigene0000205;Unigene0000241;Unigene0000343;Unigene0000577;Unigene0000642;Unigene0000767;Unigene0001041;Unigene0002162;Unigene0002229;Unigene0002418;Unigene0002524;Unigene0002918;Unigene0002922;Unigene0002930;Unigene0003120;Unigene0003122;Unigene0003241;Unigene0003419;Unigene0003815;Unigene0003842;Unigene0004132;Unigene0004244;Unigene0004270;Unigene00…
GO:0044249	cellular biosynthetic process	462	1407	6.79937e-06	0.000226593	Unigene0000012;Unigene0000015;Unigene0000024;Unigene0000035;Unigene0000042;Unigene0000069;Unigene0000092;Unigene0000099;Unigene0000116;Unigene0000164;Unigene0000205;Unigene0000226;Unigene0000233;Unigene0000241;Unigene0000343;Unigene0000525;Unigene0000566;Unigene0000577;Unigene0000604;Unigene0000613;Unigene0000642;Unigene0000660;Unigene0000672;Unigene0000707;Unigene0000729;Unigene0000767;Unigene00…
GO:0009058	biosynthetic process	494	1517	8.41582e-06	0.000274088	Unigene0000012;Unigene0000015;Unigene0000024;Unigene0000035;Unigene0000042;Unigene0000069;Unigene0000092;Unigene0000099;Unigene0000116;Unigene0000164;Unigene0000205;Unigene0000226;Unigene0000233;Unigene0000241;Unigene0000343;Unigene0000525;Unigene0000566;Unigene0000577;Unigene0000604;Unigene0000613;Unigene0000642;Unigene0000660;Unigene0000672;Unigene0000707;Unigene0000729;Unigene0000767;Unigene00…
GO:1901362	organic cyclic compound biosynthetic process	180	490	9.33473e-06	0.000297259	Unigene0000015;Unigene0000024;Unigene0000099;Unigene0000205;Unigene0000241;Unigene0000343;Unigene0000577;Unigene0000642;Unigene0000767;Unigene0001041;Unigene0002162;Unigene0002229;Unigene0002418;Unigene0002524;Unigene0002918;Unigene0002922;Unigene0002930;Unigene0002967;Unigene0003120;Unigene0003122;Unigene0003241;Unigene0003419;Unigene0003815;Unigene0003842;Unigene0004132;Unigene0004244;Unigene00…
GO:1901576	organic substance biosynthetic process	462	1412	1.04526e-05	0.000325622	Unigene0000012;Unigene0000015;Unigene0000024;Unigene0000035;Unigene0000042;Unigene0000069;Unigene0000092;Unigene0000099;Unigene0000116;Unigene0000164;Unigene0000205;Unigene0000226;Unigene0000233;Unigene0000241;Unigene0000343;Unigene0000525;Unigene0000566;Unigene0000577;Unigene0000604;Unigene0000613;Unigene0000642;Unigene0000660;Unigene0000672;Unigene0000707;Unigene0000729;Unigene0000767;Unigene00…
GO:0006720	isoprenoid metabolic process	40	78	1.09674e-05	0.000334389	Unigene0002542;Unigene0003241;Unigene0003429;Unigene0003446;Unigene0004244;Unigene0004270;Unigene0004291;Unigene0007995;Unigene0009893;Unigene0012304;Unigene0012339;Unigene0013138;Unigene0013153;Unigene0014166;Unigene0014784;Unigene0015752;Unigene0015842;Unigene0016019;Unigene0016628;Unigene0019369;Unigene0020722;Unigene0022868;Unigene0023044;Unigene0024189;Unigene0024751;Unigene0029014;Unigene00…
GO:0044255	cellular lipid metabolic process	137	359	1.31989e-05	0.000394041	Unigene0000099;Unigene0000156;Unigene0000350;Unigene0000498;Unigene0000508;Unigene0000707;Unigene0001035;Unigene0001265;Unigene0001588;Unigene0001759;Unigene0002170;Unigene0002536;Unigene0002542;Unigene0003005;Unigene0003128;Unigene0003241;Unigene0003393;Unigene0003416;Unigene0003429;Unigene0003432;Unigene0003446;Unigene0003795;Unigene0004244;Unigene0004270;Unigene0004291;Unigene0004558;Unigene00…
GO:0009657	plastid organization	49	103	1.7266e-05	0.000504943	Unigene0000024;Unigene0002922;Unigene0002930;Unigene0003160;Unigene0005121;Unigene0006211;Unigene0009105;Unigene0009981;Unigene0010773;Unigene0011058;Unigene0012795;Unigene0013153;Unigene0013726;Unigene0014088;Unigene0015940;Unigene0016019;Unigene0017874;Unigene0017982;Unigene0019369;Unigene0020250;Unigene0020980;Unigene0021735;Unigene0022131;Unigene0022868;Unigene0023775;Unigene0023865;Unigene00…
GO:0019438	aromatic compound biosynthetic process	164	446	2.21601e-05	0.00063511	Unigene0000015;Unigene0000024;Unigene0000099;Unigene0000205;Unigene0000241;Unigene0000343;Unigene0000577;Unigene0000642;Unigene0000767;Unigene0001041;Unigene0002162;Unigene0002229;Unigene0002418;Unigene0002524;Unigene0002922;Unigene0002930;Unigene0003120;Unigene0003122;Unigene0003241;Unigene0003419;Unigene0003815;Unigene0003842;Unigene0004132;Unigene0004244;Unigene0004270;Unigene0004378;Unigene00…
GO:0008299	isoprenoid biosynthetic process	26	45	2.62213e-05	0.000736767	Unigene0002542;Unigene0003241;Unigene0004244;Unigene0004270;Unigene0007995;Unigene0012339;Unigene0013153;Unigene0015752;Unigene0015842;Unigene0016019;Unigene0019369;Unigene0022868;Unigene0023044;Unigene0024189;Unigene0029014;Unigene0031301;Unigene0032165;Unigene0032499;Unigene0034448;Unigene0036530;Unigene0037591;Unigene0037905;Unigene0039717;Unigene0040089;Unigene0040712;Unigene0042591
GO:0044723	single-organism carbohydrate metabolic process	87	213	3.01732e-05	0.000831503	Unigene0000069;Unigene0000092;Unigene0000116;Unigene0000566;Unigene0000569;Unigene0001588;Unigene0001883;Unigene0002729;Unigene0002794;Unigene0002930;Unigene0005285;Unigene0008033;Unigene0008419;Unigene0008524;Unigene0009031;Unigene0009217;Unigene0009808;Unigene0010031;Unigene0010185;Unigene0010482;Unigene0010823;Unigene0011321;Unigene0013193;Unigene0013396;Unigene0013698;Unigene0014654;Unigene00…
GO:0009987	cellular process	1635	5576	3.7089e-05	0.0010028	Unigene0000008;Unigene0000012;Unigene0000015;Unigene0000024;Unigene0000035;Unigene0000042;Unigene0000059;Unigene0000064;Unigene0000069;Unigene0000092;Unigene0000097;Unigene0000098;Unigene0000099;Unigene0000108;Unigene0000116;Unigene0000119;Unigene0000120;Unigene0000127;Unigene0000133;Unigene0000156;Unigene0000157;Unigene0000164;Unigene0000167;Unigene0000190;Unigene0000205;Unigene0000213;Unigene00…
GO:0044265	cellular macromolecule catabolic process	63	145	4.29578e-05	0.00113997	Unigene0000064;Unigene0000116;Unigene0000304;Unigene0000569;Unigene0001792;Unigene0002210;Unigene0003021;Unigene0004270;Unigene0004558;Unigene0004635;Unigene0006935;Unigene0007694;Unigene0008149;Unigene0008585;Unigene0009026;Unigene0009031;Unigene0009808;Unigene0011983;Unigene0012010;Unigene0012926;Unigene0013201;Unigene0014654;Unigene0014734;Unigene0015094;Unigene0017382;Unigene0019367;Unigene00…
GO:0009628	response to abiotic stimulus	156	426	4.51824e-05	0.00117721	Unigene0000059;Unigene0000092;Unigene0000108;Unigene0000119;Unigene0000498;Unigene0000581;Unigene0000667;Unigene0000696;Unigene0001210;Unigene0001498;Unigene0001567;Unigene0001588;Unigene0001634;Unigene0001677;Unigene0001792;Unigene0001924;Unigene0001959;Unigene0002027;Unigene0002162;Unigene0002229;Unigene0002264;Unigene0002542;Unigene0002682;Unigene0003021;Unigene0003160;Unigene0003363;Unigene00…
GO:0016043	cellular component organization	310	923	4.63737e-05	0.00118667	Unigene0000024;Unigene0000042;Unigene0000069;Unigene0000097;Unigene0000099;Unigene0000108;Unigene0000116;Unigene0000213;Unigene0000233;Unigene0000324;Unigene0000498;Unigene0000550;Unigene0000569;Unigene0000592;Unigene0000660;Unigene0000667;Unigene0000695;Unigene0000935;Unigene0001283;Unigene0001351;Unigene0001677;Unigene0001690;Unigene0001792;Unigene0001844;Unigene0001959;Unigene0002004;Unigene00…
GO:0009648	photoperiodism	21	35	7.34012e-05	0.00184533	Unigene0000498;Unigene0002027;Unigene0003021;Unigene0003363;Unigene0004171;Unigene0004397;Unigene0004558;Unigene0010031;Unigene0019946;Unigene0021749;Unigene0026615;Unigene0028647;Unigene0030262;Unigene0032310;Unigene0032443;Unigene0032698;Unigene0032732;Unigene0032866;Unigene0038143;Unigene0038852;Unigene0040250
GO:0051188	cofactor biosynthetic process	41	86	7.7501e-05	0.00189066	Unigene0001531;Unigene0002922;Unigene0004270;Unigene0005121;Unigene0005947;Unigene0007793;Unigene0008058;Unigene0009466;Unigene0013153;Unigene0014704;Unigene0014981;Unigene0015626;Unigene0020407;Unigene0020980;Unigene0022868;Unigene0024134;Unigene0026019;Unigene0026066;Unigene0026435;Unigene0028295;Unigene0030690;Unigene0031731;Unigene0032313;Unigene0032327;Unigene0032499;Unigene0033829;Unigene00…
GO:0044699	single-organism process	1240	4154	7.78428e-05	0.00189066	Unigene0000008;Unigene0000024;Unigene0000035;Unigene0000042;Unigene0000043;Unigene0000054;Unigene0000069;Unigene0000083;Unigene0000092;Unigene0000097;Unigene0000099;Unigene0000108;Unigene0000116;Unigene0000119;Unigene0000120;Unigene0000127;Unigene0000156;Unigene0000190;Unigene0000226;Unigene0000229;Unigene0000233;Unigene0000241;Unigene0000252;Unigene0000265;Unigene0000268;Unigene0000313;Unigene00…
GO:0016114	terpenoid biosynthetic process	23	40	8.48664e-05	0.00202689	Unigene0002542;Unigene0003241;Unigene0004244;Unigene0004270;Unigene0012339;Unigene0013153;Unigene0015752;Unigene0016019;Unigene0022868;Unigene0023044;Unigene0024189;Unigene0029014;Unigene0031301;Unigene0032165;Unigene0032499;Unigene0034448;Unigene0036530;Unigene0037591;Unigene0037905;Unigene0039717;Unigene0040089;Unigene0040712;Unigene0042591
GO:0006721	terpenoid metabolic process	32	63	0.000103934	0.00240659	Unigene0002542;Unigene0003241;Unigene0003429;Unigene0003446;Unigene0004244;Unigene0004270;Unigene0004291;Unigene0012339;Unigene0013138;Unigene0013153;Unigene0014784;Unigene0015752;Unigene0016019;Unigene0016628;Unigene0020722;Unigene0022868;Unigene0023044;Unigene0024189;Unigene0029014;Unigene0031301;Unigene0032165;Unigene0032499;Unigene0033632;Unigene0034448;Unigene0036530;Unigene0037591;Unigene00…
GO:0006732	coenzyme metabolic process	60	140	0.000104123	0.00240659	Unigene0001531;Unigene0001716;Unigene0002527;Unigene0002702;Unigene0003160;Unigene0004270;Unigene0005121;Unigene0005947;Unigene0007625;Unigene0008717;Unigene0008840;Unigene0009466;Unigene0009524;Unigene0010797;Unigene0012304;Unigene0013153;Unigene0014166;Unigene0014981;Unigene0015714;Unigene0016175;Unigene0017509;Unigene0018577;Unigene0020716;Unigene0020980;Unigene0022679;Unigene0022868;Unigene00…
GO:0006399	tRNA metabolic process	42	90	0.000117351	0.00266927	Unigene0000226;Unigene0000525;Unigene0000613;Unigene0000902;Unigene0001950;Unigene0002384;Unigene0003083;Unigene0003596;Unigene0004141;Unigene0004781;Unigene0005515;Unigene0008429;Unigene0008787;Unigene0009025;Unigene0011230;Unigene0012795;Unigene0014088;Unigene0016482;Unigene0018266;Unigene0019693;Unigene0019812;Unigene0021077;Unigene0021152;Unigene0031069;Unigene0032303;Unigene0032721;Unigene00…
GO:0044802	single-organism membrane organization	38	80	0.000154355	0.0034561	Unigene0000024;Unigene0002922;Unigene0002930;Unigene0005121;Unigene0009981;Unigene0010773;Unigene0011058;Unigene0012795;Unigene0013153;Unigene0013726;Unigene0016019;Unigene0020980;Unigene0021735;Unigene0022131;Unigene0022699;Unigene0022868;Unigene0023389;Unigene0023865;Unigene0028295;Unigene0028305;Unigene0031227;Unigene0031237;Unigene0031301;Unigene0032016;Unigene0032431;Unigene0032499;Unigene00…
GO:0050896	response to stimulus	432	1347	0.000182154	0.0040158	Unigene0000035;Unigene0000042;Unigene0000059;Unigene0000092;Unigene0000108;Unigene0000119;Unigene0000127;Unigene0000156;Unigene0000190;Unigene0000324;Unigene0000350;Unigene0000498;Unigene0000569;Unigene0000581;Unigene0000667;Unigene0000696;Unigene0000902;Unigene0001210;Unigene0001242;Unigene0001265;Unigene0001275;Unigene0001353;Unigene0001463;Unigene0001464;Unigene0001469;Unigene0001473;Unigene00…
GO:0032774	RNA biosynthetic process	96	250	0.000197544	0.00428242	Unigene0000015;Unigene0000024;Unigene0000099;Unigene0000205;Unigene0000241;Unigene0000343;Unigene0000577;Unigene0000642;Unigene0000767;Unigene0002162;Unigene0002229;Unigene0002930;Unigene0003120;Unigene0003241;Unigene0003419;Unigene0004132;Unigene0004244;Unigene0004270;Unigene0004378;Unigene0005121;Unigene0005565;Unigene0006211;Unigene0006742;Unigene0006883;Unigene0006968;Unigene0007516;Unigene00…
GO:0006259	DNA metabolic process	109	290	0.000201903	0.00428242	Unigene0000299;Unigene0000747;Unigene0000902;Unigene0001242;Unigene0001473;Unigene0001792;Unigene0001924;Unigene0002229;Unigene0002264;Unigene0002361;Unigene0002944;Unigene0002980;Unigene0003120;Unigene0003419;Unigene0003810;Unigene0004162;Unigene0004178;Unigene0004397;Unigene0004558;Unigene0004833;Unigene0004907;Unigene0005197;Unigene0005278;Unigene0005280;Unigene0005565;Unigene0005791;Unigene00…
GO:0006629	lipid metabolic process	154	431	0.000203213	0.00428242	Unigene0000043;Unigene0000099;Unigene0000156;Unigene0000350;Unigene0000498;Unigene0000508;Unigene0000707;Unigene0001035;Unigene0001265;Unigene0001588;Unigene0001759;Unigene0002170;Unigene0002536;Unigene0002542;Unigene0002979;Unigene0003005;Unigene0003128;Unigene0003241;Unigene0003393;Unigene0003416;Unigene0003429;Unigene0003432;Unigene0003446;Unigene0003795;Unigene0004244;Unigene0004270;Unigene00…
GO:0006090	pyruvate metabolic process	57	135	0.000247451	0.00513909	Unigene0000092;Unigene0001959;Unigene0002542;Unigene0002922;Unigene0002930;Unigene0004270;Unigene0004291;Unigene0004644;Unigene0005121;Unigene0005443;Unigene0006359;Unigene0006729;Unigene0008717;Unigene0009105;Unigene0009466;Unigene0009524;Unigene0010482;Unigene0010823;Unigene0011058;Unigene0013153;Unigene0014683;Unigene0014981;Unigene0015714;Unigene0016019;Unigene0016724;Unigene0016729;Unigene00…
GO:1901565	organonitrogen compound catabolic process	22	40	0.000291136	0.00595996	Unigene0001893;Unigene0002702;Unigene0006836;Unigene0007350;Unigene0011019;Unigene0014439;Unigene0014894;Unigene0019643;Unigene0021522;Unigene0024972;Unigene0033296;Unigene0034154;Unigene0034306;Unigene0034792;Unigene0035534;Unigene0035579;Unigene0037689;Unigene0039228;Unigene0039611;Unigene0040055;Unigene0041654;Unigene0042591
GO:0006733	oxidoreduction coenzyme metabolic process	32	66	0.000314657	0.00635075	Unigene0001716;Unigene0002527;Unigene0002702;Unigene0004270;Unigene0005121;Unigene0005947;Unigene0008717;Unigene0008840;Unigene0009524;Unigene0010797;Unigene0013153;Unigene0016175;Unigene0018577;Unigene0020980;Unigene0022679;Unigene0022868;Unigene0026039;Unigene0030755;Unigene0032071;Unigene0032310;Unigene0032499;Unigene0033803;Unigene0033829;Unigene0034154;Unigene0034408;Unigene0035178;Unigene00…
GO:0034654	nucleobase-containing compound biosynthetic process	136	378	0.000338823	0.00673711	Unigene0000015;Unigene0000024;Unigene0000099;Unigene0000205;Unigene0000241;Unigene0000343;Unigene0000577;Unigene0000642;Unigene0000767;Unigene0001041;Unigene0002162;Unigene0002229;Unigene0002418;Unigene0002524;Unigene0002930;Unigene0003120;Unigene0003122;Unigene0003241;Unigene0003419;Unigene0003815;Unigene0003842;Unigene0004132;Unigene0004244;Unigene0004270;Unigene0004378;Unigene0005121;Unigene00…
GO:0016109	tetraterpenoid biosynthetic process	19	33	0.000343203	0.00673711	Unigene0002542;Unigene0003241;Unigene0004244;Unigene0004270;Unigene0012339;Unigene0013153;Unigene0015752;Unigene0016019;Unigene0022868;Unigene0024189;Unigene0029014;Unigene0031301;Unigene0032165;Unigene0032499;Unigene0036530;Unigene0037591;Unigene0039717;Unigene0040089;Unigene0042591
GO:0006281	DNA repair	30	61	0.000351991	0.00680704	Unigene0001242;Unigene0001473;Unigene0002229;Unigene0002944;Unigene0003120;Unigene0004558;Unigene0005918;Unigene0006327;Unigene0006935;Unigene0007645;Unigene0009065;Unigene0009862;Unigene0014617;Unigene0014689;Unigene0016523;Unigene0016626;Unigene0017293;Unigene0017887;Unigene0022069;Unigene0023381;Unigene0030169;Unigene0032175;Unigene0035227;Unigene0036173;Unigene0036556;Unigene0037467;Unigene00…
GO:0043603	cellular amide metabolic process	66	163	0.000356265	0.00680704	Unigene0000226;Unigene0000525;Unigene0000613;Unigene0000729;Unigene0002384;Unigene0002520;Unigene0002542;Unigene0003264;Unigene0003596;Unigene0004073;Unigene0004141;Unigene0004781;Unigene0005188;Unigene0005946;Unigene0006684;Unigene0007625;Unigene0009754;Unigene0012582;Unigene0012795;Unigene0014088;Unigene0014144;Unigene0014528;Unigene0017173;Unigene0017509;Unigene0018266;Unigene0019622;Unigene00…
GO:0003006	developmental process involved in reproduction	125	344	0.000369803	0.00697274	Unigene0000099;Unigene0000108;Unigene0000119;Unigene0000127;Unigene0000233;Unigene0000241;Unigene0000581;Unigene0000592;Unigene0000667;Unigene0000747;Unigene0000902;Unigene0000935;Unigene0001210;Unigene0001351;Unigene0001677;Unigene0002162;Unigene0002384;Unigene0002497;Unigene0002922;Unigene0003363;Unigene0003419;Unigene0004122;Unigene0004141;Unigene0004269;Unigene0004569;Unigene0004638;Unigene00…
GO:0006974	cellular response to DNA damage stimulus	31	64	0.000397115	0.00739047	Unigene0001242;Unigene0001473;Unigene0002229;Unigene0002944;Unigene0003120;Unigene0004558;Unigene0005918;Unigene0006327;Unigene0006935;Unigene0007645;Unigene0009065;Unigene0009862;Unigene0014617;Unigene0014689;Unigene0016523;Unigene0016626;Unigene0017293;Unigene0017887;Unigene0022069;Unigene0023381;Unigene0026622;Unigene0030169;Unigene0032175;Unigene0035227;Unigene0036173;Unigene0036556;Unigene00…
GO:0044085	cellular component biogenesis	103	277	0.000470496	0.00864385	Unigene0000024;Unigene0000099;Unigene0000164;Unigene0000324;Unigene0000480;Unigene0000550;Unigene0000667;Unigene0001690;Unigene0001792;Unigene0002542;Unigene0002682;Unigene0003120;Unigene0004635;Unigene0005025;Unigene0005413;Unigene0006211;Unigene0006883;Unigene0007516;Unigene0007786;Unigene0009026;Unigene0009031;Unigene0009518;Unigene0009638;Unigene0010633;Unigene0010722;Unigene0011043;Unigene00…
GO:0006518	peptide metabolic process	57	138	0.000486575	0.0088261	Unigene0000226;Unigene0000525;Unigene0000613;Unigene0000729;Unigene0002384;Unigene0002520;Unigene0002542;Unigene0003264;Unigene0003596;Unigene0004073;Unigene0004141;Unigene0004781;Unigene0005188;Unigene0005946;Unigene0006684;Unigene0009754;Unigene0012582;Unigene0012795;Unigene0014088;Unigene0014144;Unigene0014528;Unigene0017173;Unigene0018266;Unigene0019622;Unigene0019693;Unigene0019812;Unigene00…
GO:0072524	pyridine-containing compound metabolic process	30	62	0.000501333	0.00898013	Unigene0001716;Unigene0002702;Unigene0004270;Unigene0005121;Unigene0008717;Unigene0009524;Unigene0013153;Unigene0016175;Unigene0018577;Unigene0020980;Unigene0022679;Unigene0022868;Unigene0026039;Unigene0030690;Unigene0030755;Unigene0031731;Unigene0032310;Unigene0032499;Unigene0033803;Unigene0033829;Unigene0034154;Unigene0034408;Unigene0034609;Unigene0035178;Unigene0036313;Unigene0037134;Unigene00…
GO:0016108	tetraterpenoid metabolic process	19	34	0.000575007	0.0101726	Unigene0002542;Unigene0003241;Unigene0004244;Unigene0004270;Unigene0012339;Unigene0013153;Unigene0015752;Unigene0016019;Unigene0022868;Unigene0024189;Unigene0029014;Unigene0031301;Unigene0032165;Unigene0032499;Unigene0036530;Unigene0037591;Unigene0039717;Unigene0040089;Unigene0042591
GO:0033014	tetrapyrrole biosynthetic process	24	47	0.000676304	0.0118188	Unigene0002922;Unigene0004270;Unigene0004703;Unigene0005121;Unigene0007793;Unigene0008058;Unigene0009466;Unigene0013153;Unigene0014704;Unigene0014981;Unigene0015626;Unigene0020407;Unigene0020980;Unigene0022868;Unigene0026435;Unigene0032313;Unigene0032327;Unigene0032499;Unigene0036430;Unigene0036512;Unigene0037591;Unigene0037905;Unigene0039229;Unigene0042591
GO:0048827	phyllome development	18	32	0.000720734	0.0124038	Unigene0000108;Unigene0000581;Unigene0000667;Unigene0000747;Unigene0000902;Unigene0002997;Unigene0003429;Unigene0004269;Unigene0007962;Unigene0012583;Unigene0016326;Unigene0020442;Unigene0027117;Unigene0034071;Unigene0034165;Unigene0038143;Unigene0038965;Unigene0039734
GO:0043043	peptide biosynthetic process	55	134	0.000727087	0.0124038	Unigene0000226;Unigene0000525;Unigene0000613;Unigene0000729;Unigene0002384;Unigene0002520;Unigene0002542;Unigene0003264;Unigene0003596;Unigene0004073;Unigene0004141;Unigene0004781;Unigene0005188;Unigene0005946;Unigene0006684;Unigene0009754;Unigene0012582;Unigene0012795;Unigene0014088;Unigene0014144;Unigene0014528;Unigene0018266;Unigene0019622;Unigene0019693;Unigene0019812;Unigene0019997;Unigene00…
GO:0043604	amide biosynthetic process	58	143	0.000752281	0.0125346	Unigene0000226;Unigene0000525;Unigene0000613;Unigene0000729;Unigene0002384;Unigene0002520;Unigene0002542;Unigene0003264;Unigene0003596;Unigene0004073;Unigene0004141;Unigene0004781;Unigene0005188;Unigene0005946;Unigene0006684;Unigene0009754;Unigene0012582;Unigene0012795;Unigene0014088;Unigene0014144;Unigene0014528;Unigene0018266;Unigene0019622;Unigene0019693;Unigene0019812;Unigene0019997;Unigene00…
GO:0043933	macromolecular complex subunit organization	128	359	0.000759436	0.0125346	Unigene0000024;Unigene0000097;Unigene0000099;Unigene0000233;Unigene0000324;Unigene0000550;Unigene0000660;Unigene0000935;Unigene0001351;Unigene0001690;Unigene0001792;Unigene0001844;Unigene0002162;Unigene0002542;Unigene0003120;Unigene0003363;Unigene0003419;Unigene0004635;Unigene0004977;Unigene0005025;Unigene0005197;Unigene0005413;Unigene0005565;Unigene0005637;Unigene0006211;Unigene0006883;Unigene00…
GO:0022607	cellular component assembly	73	188	0.000766332	0.0125346	Unigene0000024;Unigene0000324;Unigene0000550;Unigene0000667;Unigene0001690;Unigene0001792;Unigene0002542;Unigene0002682;Unigene0003120;Unigene0004635;Unigene0005025;Unigene0005413;Unigene0006211;Unigene0006883;Unigene0009026;Unigene0009031;Unigene0009518;Unigene0010633;Unigene0011900;Unigene0012010;Unigene0013726;Unigene0014074;Unigene0014095;Unigene0014439;Unigene0014734;Unigene0014894;Unigene00…
GO:0022414	reproductive process	133	375	0.000769744	0.0125346	Unigene0000099;Unigene0000108;Unigene0000119;Unigene0000127;Unigene0000233;Unigene0000241;Unigene0000324;Unigene0000581;Unigene0000592;Unigene0000667;Unigene0000747;Unigene0000902;Unigene0000935;Unigene0001210;Unigene0001351;Unigene0001677;Unigene0002162;Unigene0002384;Unigene0002497;Unigene0002922;Unigene0003120;Unigene0003363;Unigene0003419;Unigene0004122;Unigene0004141;Unigene0004269;Unigene00…
GO:0097659	nucleic acid-templated transcription	86	228	0.000807262	0.0129978	Unigene0000015;Unigene0000024;Unigene0000099;Unigene0000205;Unigene0000241;Unigene0000343;Unigene0000577;Unigene0000642;Unigene0002162;Unigene0002229;Unigene0002930;Unigene0003120;Unigene0003241;Unigene0003419;Unigene0004132;Unigene0004270;Unigene0004378;Unigene0005121;Unigene0005565;Unigene0006211;Unigene0006742;Unigene0006883;Unigene0006968;Unigene0007516;Unigene0007645;Unigene0008534;Unigene00…
GO:0019219	regulation of nucleobase-containing compound metabolic process	81	213	0.000853615	0.0134867	Unigene0000015;Unigene0000024;Unigene0000099;Unigene0000205;Unigene0000343;Unigene0000767;Unigene0002162;Unigene0002229;Unigene0003120;Unigene0003241;Unigene0003419;Unigene0003810;Unigene0004270;Unigene0004378;Unigene0005197;Unigene0005565;Unigene0006211;Unigene0006742;Unigene0006883;Unigene0007516;Unigene0007645;Unigene0008534;Unigene0009026;Unigene0009466;Unigene0009981;Unigene0010186;Unigene00…
GO:0016042	lipid catabolic process	23	45	0.000856449	0.0134867	Unigene0000498;Unigene0003128;Unigene0003416;Unigene0003795;Unigene0004558;Unigene0004638;Unigene0008075;Unigene0009217;Unigene0014216;Unigene0014734;Unigene0015704;Unigene0019778;Unigene0025571;Unigene0030212;Unigene0032719;Unigene0034535;Unigene0036371;Unigene0037553;Unigene0038309;Unigene0038716;Unigene0039669;Unigene0040746;Unigene0041654
GO:0006412	translation	54	132	0.000887764	0.0137653	Unigene0000226;Unigene0000525;Unigene0000613;Unigene0000729;Unigene0002384;Unigene0002520;Unigene0002542;Unigene0003264;Unigene0003596;Unigene0004073;Unigene0004141;Unigene0004781;Unigene0005188;Unigene0005946;Unigene0006684;Unigene0009754;Unigene0012582;Unigene0012795;Unigene0014088;Unigene0014144;Unigene0014528;Unigene0018266;Unigene0019622;Unigene0019693;Unigene0019812;Unigene0019997;Unigene00…
GO:0009057	macromolecule catabolic process	76	198	0.000893349	0.0137653	Unigene0000064;Unigene0000116;Unigene0000304;Unigene0000498;Unigene0000569;Unigene0001792;Unigene0002210;Unigene0002280;Unigene0003021;Unigene0004270;Unigene0004558;Unigene0004635;Unigene0004638;Unigene0006836;Unigene0006935;Unigene0007694;Unigene0008149;Unigene0008585;Unigene0009026;Unigene0009031;Unigene0009105;Unigene0009808;Unigene0010081;Unigene0011983;Unigene0012010;Unigene0012926;Unigene00…
GO:0051171	regulation of nitrogen compound metabolic process	97	263	0.000931128	0.0141947	Unigene0000015;Unigene0000024;Unigene0000099;Unigene0000205;Unigene0000226;Unigene0000343;Unigene0000525;Unigene0000613;Unigene0000767;Unigene0002162;Unigene0002229;Unigene0003120;Unigene0003241;Unigene0003419;Unigene0003810;Unigene0004270;Unigene0004378;Unigene0005188;Unigene0005197;Unigene0005565;Unigene0006211;Unigene0006742;Unigene0006883;Unigene0007516;Unigene0007645;Unigene0008534;Unigene00…
GO:0044260	cellular macromolecule metabolic process	840	2784	0.000959647	0.0144755	Unigene0000012;Unigene0000015;Unigene0000024;Unigene0000035;Unigene0000042;Unigene0000059;Unigene0000064;Unigene0000069;Unigene0000098;Unigene0000099;Unigene0000108;Unigene0000116;Unigene0000120;Unigene0000127;Unigene0000133;Unigene0000164;Unigene0000190;Unigene0000205;Unigene0000226;Unigene0000229;Unigene0000233;Unigene0000241;Unigene0000252;Unigene0000299;Unigene0000304;Unigene0000313;Unigene00…
GO:0009668	plastid membrane organization	30	64	0.000974303	0.0145435	Unigene0000024;Unigene0002922;Unigene0002930;Unigene0005121;Unigene0009981;Unigene0010773;Unigene0011058;Unigene0012795;Unigene0013153;Unigene0013726;Unigene0016019;Unigene0020980;Unigene0021735;Unigene0022131;Unigene0022868;Unigene0023865;Unigene0028295;Unigene0031227;Unigene0031237;Unigene0031301;Unigene0032016;Unigene0032431;Unigene0032499;Unigene0032886;Unigene0033418;Unigene0035601;Unigene00…
GO:0044282	small molecule catabolic process	27	56	0.00101077	0.0149324	Unigene0000498;Unigene0002702;Unigene0003128;Unigene0003416;Unigene0003795;Unigene0004558;Unigene0004638;Unigene0008075;Unigene0009217;Unigene0011019;Unigene0014216;Unigene0014734;Unigene0014894;Unigene0015704;Unigene0019778;Unigene0025571;Unigene0027548;Unigene0030212;Unigene0032719;Unigene0034306;Unigene0034535;Unigene0037553;Unigene0038309;Unigene0038716;Unigene0039669;Unigene0040746;Unigene00…
GO:0000003	reproduction	134	381	0.00107782	0.015677	Unigene0000099;Unigene0000108;Unigene0000119;Unigene0000127;Unigene0000233;Unigene0000241;Unigene0000324;Unigene0000581;Unigene0000592;Unigene0000667;Unigene0000747;Unigene0000902;Unigene0000935;Unigene0001210;Unigene0001351;Unigene0001677;Unigene0002162;Unigene0002384;Unigene0002497;Unigene0002922;Unigene0003120;Unigene0003363;Unigene0003419;Unigene0004122;Unigene0004141;Unigene0004269;Unigene00…
GO:0044257	cellular protein catabolic process	53	130	0.00108306	0.015677	Unigene0000064;Unigene0000116;Unigene0000304;Unigene0000569;Unigene0001792;Unigene0002210;Unigene0004270;Unigene0004558;Unigene0004635;Unigene0007694;Unigene0008149;Unigene0009026;Unigene0009031;Unigene0009808;Unigene0011983;Unigene0012010;Unigene0012926;Unigene0013201;Unigene0014654;Unigene0014734;Unigene0015094;Unigene0017382;Unigene0019367;Unigene0019388;Unigene0021484;Unigene0022586;Unigene00…
GO:0031326	regulation of cellular biosynthetic process	91	246	0.00118744	0.017016	Unigene0000015;Unigene0000024;Unigene0000042;Unigene0000099;Unigene0000205;Unigene0000226;Unigene0000343;Unigene0000525;Unigene0000613;Unigene0000767;Unigene0002162;Unigene0002229;Unigene0003120;Unigene0003241;Unigene0003419;Unigene0004270;Unigene0004378;Unigene0005188;Unigene0005565;Unigene0006211;Unigene0006742;Unigene0006883;Unigene0007516;Unigene0007645;Unigene0008534;Unigene0009026;Unigene00…
GO:0006779	porphyrin-containing compound biosynthetic process	23	46	0.00126386	0.0177794	Unigene0002922;Unigene0004270;Unigene0005121;Unigene0007793;Unigene0008058;Unigene0009466;Unigene0013153;Unigene0014704;Unigene0014981;Unigene0015626;Unigene0020407;Unigene0020980;Unigene0022868;Unigene0026435;Unigene0032313;Unigene0032327;Unigene0032499;Unigene0036430;Unigene0036512;Unigene0037591;Unigene0037905;Unigene0039229;Unigene0042591
GO:0016054	organic acid catabolic process	26	54	0.00127793	0.0177794	Unigene0000498;Unigene0002702;Unigene0003128;Unigene0003416;Unigene0003795;Unigene0004558;Unigene0004638;Unigene0008075;Unigene0009217;Unigene0011019;Unigene0014216;Unigene0014734;Unigene0014894;Unigene0015704;Unigene0019778;Unigene0025571;Unigene0030212;Unigene0032719;Unigene0034306;Unigene0034535;Unigene0037553;Unigene0038309;Unigene0038716;Unigene0039669;Unigene0040746;Unigene0041654
GO:0046395	carboxylic acid catabolic process	26	54	0.00127793	0.0177794	Unigene0000498;Unigene0002702;Unigene0003128;Unigene0003416;Unigene0003795;Unigene0004558;Unigene0004638;Unigene0008075;Unigene0009217;Unigene0011019;Unigene0014216;Unigene0014734;Unigene0014894;Unigene0015704;Unigene0019778;Unigene0025571;Unigene0030212;Unigene0032719;Unigene0034306;Unigene0034535;Unigene0037553;Unigene0038309;Unigene0038716;Unigene0039669;Unigene0040746;Unigene0041654
GO:0009639	response to red or far red light	34	76	0.00129251	0.0178093	Unigene0000108;Unigene0001792;Unigene0002162;Unigene0002542;Unigene0003419;Unigene0004270;Unigene0007521;Unigene0007645;Unigene0008369;Unigene0009026;Unigene0009466;Unigene0010081;Unigene0014686;Unigene0020980;Unigene0022053;Unigene0022586;Unigene0022868;Unigene0025571;Unigene0026615;Unigene0027117;Unigene0027413;Unigene0028321;Unigene0028647;Unigene0032349;Unigene0032866;Unigene0034165;Unigene00…
GO:0006351	transcription, DNA-templated	84	225	0.00132002	0.0178398	Unigene0000015;Unigene0000024;Unigene0000099;Unigene0000205;Unigene0000241;Unigene0000343;Unigene0000642;Unigene0002162;Unigene0002229;Unigene0002930;Unigene0003120;Unigene0003241;Unigene0003419;Unigene0004132;Unigene0004270;Unigene0004378;Unigene0005121;Unigene0005565;Unigene0006211;Unigene0006742;Unigene0006883;Unigene0006968;Unigene0007516;Unigene0007645;Unigene0008534;Unigene0009026;Unigene00…
GO:0006396	RNA processing	68	176	0.00133187	0.0178398	Unigene0000042;Unigene0000099;Unigene0000190;Unigene0000480;Unigene0000902;Unigene0001494;Unigene0001508;Unigene0002162;Unigene0002229;Unigene0003097;Unigene0003419;Unigene0004132;Unigene0004159;Unigene0004435;Unigene0005565;Unigene0005888;Unigene0006574;Unigene0006883;Unigene0006968;Unigene0007786;Unigene0008429;Unigene0008534;Unigene0008750;Unigene0009025;Unigene0010186;Unigene0010791;Unigene00…
GO:0030163	protein catabolic process	53	131	0.00133207	0.0178398	Unigene0000064;Unigene0000116;Unigene0000304;Unigene0000569;Unigene0001792;Unigene0002210;Unigene0004270;Unigene0004558;Unigene0004635;Unigene0007694;Unigene0008149;Unigene0009026;Unigene0009031;Unigene0009808;Unigene0011983;Unigene0012010;Unigene0012926;Unigene0013201;Unigene0014654;Unigene0014734;Unigene0015094;Unigene0017382;Unigene0019367;Unigene0019388;Unigene0021484;Unigene0022586;Unigene00…
GO:0008610	lipid biosynthetic process	65	167	0.00135288	0.0179508	Unigene0000099;Unigene0000707;Unigene0001265;Unigene0002536;Unigene0002542;Unigene0003005;Unigene0003241;Unigene0003393;Unigene0003432;Unigene0004244;Unigene0004270;Unigene0004584;Unigene0005637;Unigene0007995;Unigene0008832;Unigene0009466;Unigene0010803;Unigene0012339;Unigene0013153;Unigene0014166;Unigene0014594;Unigene0014648;Unigene0014981;Unigene0015752;Unigene0015842;Unigene0016019;Unigene00…
GO:0000338	protein deneddylation	15	26	0.0014116	0.018558	Unigene0001792;Unigene0002162;Unigene0007521;Unigene0007645;Unigene0009026;Unigene0010081;Unigene0022586;Unigene0027413;Unigene0028321;Unigene0035319;Unigene0037399;Unigene0038662;Unigene0038817;Unigene0039518;Unigene0039734
GO:0033554	cellular response to stress	70	183	0.00155594	0.0202697	Unigene0001242;Unigene0001265;Unigene0001473;Unigene0001677;Unigene0002017;Unigene0002229;Unigene0002264;Unigene0002361;Unigene0002944;Unigene0003120;Unigene0004398;Unigene0004558;Unigene0004967;Unigene0005539;Unigene0005918;Unigene0006327;Unigene0006935;Unigene0007645;Unigene0008450;Unigene0009065;Unigene0009518;Unigene0009862;Unigene0011515;Unigene0014416;Unigene0014617;Unigene0014666;Unigene00…
GO:0009062	fatty acid catabolic process	22	44	0.00160278	0.0203256	Unigene0000498;Unigene0003128;Unigene0003416;Unigene0003795;Unigene0004558;Unigene0004638;Unigene0008075;Unigene0009217;Unigene0014216;Unigene0014734;Unigene0015704;Unigene0019778;Unigene0025571;Unigene0030212;Unigene0032719;Unigene0034535;Unigene0037553;Unigene0038309;Unigene0038716;Unigene0039669;Unigene0040746;Unigene0041654
GO:0044242	cellular lipid catabolic process	22	44	0.00160278	0.0203256	Unigene0000498;Unigene0003128;Unigene0003416;Unigene0003795;Unigene0004558;Unigene0004638;Unigene0008075;Unigene0009217;Unigene0014216;Unigene0014734;Unigene0015704;Unigene0019778;Unigene0025571;Unigene0030212;Unigene0032719;Unigene0034535;Unigene0037553;Unigene0038309;Unigene0038716;Unigene0039669;Unigene0040746;Unigene0041654
GO:0072329	monocarboxylic acid catabolic process	22	44	0.00160278	0.0203256	Unigene0000498;Unigene0003128;Unigene0003416;Unigene0003795;Unigene0004558;Unigene0004638;Unigene0008075;Unigene0009217;Unigene0014216;Unigene0014734;Unigene0015704;Unigene0019778;Unigene0025571;Unigene0030212;Unigene0032719;Unigene0034535;Unigene0037553;Unigene0038309;Unigene0038716;Unigene0039669;Unigene0040746;Unigene0041654
GO:0008652	cellular amino acid biosynthetic process	57	144	0.00165022	0.0207436	Unigene0000042;Unigene0000092;Unigene0000116;Unigene0001416;Unigene0001722;Unigene0002855;Unigene0003021;Unigene0003149;Unigene0003352;Unigene0003432;Unigene0003978;Unigene0004419;Unigene0004584;Unigene0004585;Unigene0004967;Unigene0005826;Unigene0006319;Unigene0007636;Unigene0008534;Unigene0009192;Unigene0009466;Unigene0009524;Unigene0009833;Unigene0009981;Unigene0010622;Unigene0010659;Unigene00…
GO:2000112	regulation of cellular macromolecule biosynthetic process	87	236	0.00169594	0.0210395	Unigene0000015;Unigene0000024;Unigene0000099;Unigene0000205;Unigene0000226;Unigene0000343;Unigene0000525;Unigene0000613;Unigene0002162;Unigene0002229;Unigene0003120;Unigene0003241;Unigene0003419;Unigene0004270;Unigene0004378;Unigene0005188;Unigene0005565;Unigene0006211;Unigene0006742;Unigene0006883;Unigene0007516;Unigene0007645;Unigene0008534;Unigene0009026;Unigene0009466;Unigene0009754;Unigene00…
GO:0005996	monosaccharide metabolic process	41	97	0.00170313	0.0210395	Unigene0000092;Unigene0000116;Unigene0000566;Unigene0000569;Unigene0002930;Unigene0008033;Unigene0008524;Unigene0009031;Unigene0010185;Unigene0010482;Unigene0010823;Unigene0013698;Unigene0014654;Unigene0015272;Unigene0015412;Unigene0017173;Unigene0020651;Unigene0020977;Unigene0021373;Unigene0021457;Unigene0021484;Unigene0022586;Unigene0022679;Unigene0026638;Unigene0026688;Unigene0030755;Unigene00…
GO:0009117	nucleotide metabolic process	75	199	0.00173673	0.0212713	Unigene0000108;Unigene0001041;Unigene0001716;Unigene0002418;Unigene0002702;Unigene0002918;Unigene0002930;Unigene0003120;Unigene0003122;Unigene0003160;Unigene0003810;Unigene0003842;Unigene0004244;Unigene0004270;Unigene0005121;Unigene0005280;Unigene0005947;Unigene0007432;Unigene0008058;Unigene0008117;Unigene0008717;Unigene0009524;Unigene0013153;Unigene0014576;Unigene0014981;Unigene0015824;Unigene00…
GO:0010556	regulation of macromolecule biosynthetic process	88	240	0.00192406	0.0233659	Unigene0000015;Unigene0000024;Unigene0000099;Unigene0000205;Unigene0000226;Unigene0000343;Unigene0000525;Unigene0000613;Unigene0000767;Unigene0002162;Unigene0002229;Unigene0003120;Unigene0003241;Unigene0003419;Unigene0004270;Unigene0004378;Unigene0005188;Unigene0005565;Unigene0006211;Unigene0006742;Unigene0006883;Unigene0007516;Unigene0007645;Unigene0008534;Unigene0009026;Unigene0009466;Unigene00…
GO:0065003	macromolecular complex assembly	63	163	0.00194528	0.0234252	Unigene0000024;Unigene0000550;Unigene0001690;Unigene0001792;Unigene0002542;Unigene0003120;Unigene0004635;Unigene0005025;Unigene0005413;Unigene0006211;Unigene0006883;Unigene0009026;Unigene0009031;Unigene0009518;Unigene0010633;Unigene0011900;Unigene0012010;Unigene0013726;Unigene0014074;Unigene0014439;Unigene0014734;Unigene0014894;Unigene0014981;Unigene0015094;Unigene0015797;Unigene0016287;Unigene00…
GO:0055086	nucleobase-containing small molecule metabolic process	87	238	0.00225477	0.0269257	Unigene0000108;Unigene0000902;Unigene0001041;Unigene0001716;Unigene0001893;Unigene0002418;Unigene0002702;Unigene0002918;Unigene0002930;Unigene0003120;Unigene0003122;Unigene0003160;Unigene0003810;Unigene0003815;Unigene0003842;Unigene0004244;Unigene0004270;Unigene0005121;Unigene0005280;Unigene0005947;Unigene0007432;Unigene0008058;Unigene0008117;Unigene0008717;Unigene0009466;Unigene0009524;Unigene00…
GO:0006950	response to stress	222	676	0.00227592	0.0269537	Unigene0000042;Unigene0000059;Unigene0000092;Unigene0000119;Unigene0000569;Unigene0000696;Unigene0000902;Unigene0001242;Unigene0001265;Unigene0001275;Unigene0001473;Unigene0001484;Unigene0001498;Unigene0001588;Unigene0001634;Unigene0001677;Unigene0001792;Unigene0001959;Unigene0002017;Unigene0002162;Unigene0002229;Unigene0002264;Unigene0002361;Unigene0002536;Unigene0002944;Unigene0003005;Unigene00…
GO:0044712	single-organism catabolic process	30	67	0.00239389	0.0281184	Unigene0000498;Unigene0001893;Unigene0002702;Unigene0003128;Unigene0003416;Unigene0003795;Unigene0004558;Unigene0004638;Unigene0008075;Unigene0009217;Unigene0011019;Unigene0014216;Unigene0014734;Unigene0014894;Unigene0015704;Unigene0019778;Unigene0025571;Unigene0026535;Unigene0027548;Unigene0030212;Unigene0032719;Unigene0034306;Unigene0034535;Unigene0036371;Unigene0037553;Unigene0038309;Unigene00…
GO:0019362	pyridine nucleotide metabolic process	27	59	0.00264976	0.0308707	Unigene0001716;Unigene0002702;Unigene0004270;Unigene0005121;Unigene0008717;Unigene0009524;Unigene0013153;Unigene0016175;Unigene0018577;Unigene0020980;Unigene0022679;Unigene0022868;Unigene0026039;Unigene0030755;Unigene0032310;Unigene0032499;Unigene0033803;Unigene0033829;Unigene0034154;Unigene0034408;Unigene0035178;Unigene0036313;Unigene0037134;Unigene0040547;Unigene0041019;Unigene0041794;Unigene00…
GO:0019637	organophosphate metabolic process	123	354	0.00277617	0.0320827	Unigene0000099;Unigene0000108;Unigene0000156;Unigene0000350;Unigene0000508;Unigene0000707;Unigene0001041;Unigene0001588;Unigene0001716;Unigene0002170;Unigene0002418;Unigene0002702;Unigene0002918;Unigene0002930;Unigene0003005;Unigene0003120;Unigene0003122;Unigene0003160;Unigene0003393;Unigene0003432;Unigene0003810;Unigene0003815;Unigene0003842;Unigene0004244;Unigene0004270;Unigene0004584;Unigene00…
GO:0043038	amino acid activation	24	51	0.00285212	0.0324373	Unigene0000226;Unigene0000525;Unigene0000613;Unigene0002384;Unigene0003596;Unigene0004141;Unigene0004781;Unigene0012795;Unigene0014088;Unigene0018266;Unigene0019693;Unigene0019812;Unigene0021152;Unigene0032303;Unigene0032887;Unigene0033360;Unigene0033418;Unigene0034956;Unigene0036378;Unigene0036385;Unigene0038244;Unigene0038908;Unigene0039717;Unigene0040849
GO:0043039	tRNA aminoacylation	24	51	0.00285212	0.0324373	Unigene0000226;Unigene0000525;Unigene0000613;Unigene0002384;Unigene0003596;Unigene0004141;Unigene0004781;Unigene0012795;Unigene0014088;Unigene0018266;Unigene0019693;Unigene0019812;Unigene0021152;Unigene0032303;Unigene0032887;Unigene0033360;Unigene0033418;Unigene0034956;Unigene0036378;Unigene0036385;Unigene0038244;Unigene0038908;Unigene0039717;Unigene0040849
GO:0051603	proteolysis involved in cellular protein catabolic process	49	123	0.00289772	0.0326963	Unigene0000064;Unigene0000116;Unigene0000304;Unigene0000569;Unigene0001792;Unigene0002210;Unigene0004558;Unigene0004635;Unigene0007694;Unigene0008149;Unigene0009026;Unigene0009031;Unigene0009808;Unigene0011983;Unigene0012010;Unigene0012926;Unigene0013201;Unigene0014654;Unigene0014734;Unigene0015094;Unigene0017382;Unigene0019367;Unigene0019388;Unigene0021484;Unigene0022586;Unigene0022963;Unigene00…
GO:0006508	proteolysis	67	178	0.00308182	0.0345019	Unigene0000064;Unigene0000116;Unigene0000304;Unigene0000569;Unigene0001792;Unigene0002162;Unigene0002210;Unigene0002355;Unigene0004114;Unigene0004558;Unigene0004635;Unigene0006129;Unigene0007521;Unigene0007645;Unigene0007694;Unigene0008149;Unigene0009026;Unigene0009031;Unigene0009808;Unigene0010081;Unigene0011983;Unigene0012010;Unigene0012926;Unigene0013201;Unigene0014654;Unigene0014734;Unigene00…
GO:0080090	regulation of primary metabolic process	118	339	0.00312904	0.034759	Unigene0000015;Unigene0000024;Unigene0000099;Unigene0000205;Unigene0000226;Unigene0000343;Unigene0000525;Unigene0000613;Unigene0000767;Unigene0002162;Unigene0002229;Unigene0003120;Unigene0003241;Unigene0003419;Unigene0003810;Unigene0004192;Unigene0004270;Unigene0004378;Unigene0004771;Unigene0005188;Unigene0005197;Unigene0005508;Unigene0005565;Unigene0006211;Unigene0006742;Unigene0006883;Unigene00…
GO:0070271	protein complex biogenesis	59	154	0.00335501	0.0369825	Unigene0000024;Unigene0000550;Unigene0001690;Unigene0001792;Unigene0002542;Unigene0003120;Unigene0004635;Unigene0005025;Unigene0005413;Unigene0006211;Unigene0009026;Unigene0009031;Unigene0010633;Unigene0011900;Unigene0012010;Unigene0013726;Unigene0014074;Unigene0014439;Unigene0014734;Unigene0014894;Unigene0014981;Unigene0015094;Unigene0015797;Unigene0016287;Unigene0017095;Unigene0019490;Unigene00…
GO:0051252	regulation of RNA metabolic process	70	188	0.00345369	0.0377796	Unigene0000015;Unigene0000024;Unigene0000099;Unigene0000205;Unigene0000343;Unigene0000767;Unigene0002162;Unigene0002229;Unigene0003120;Unigene0003241;Unigene0003419;Unigene0004270;Unigene0004378;Unigene0005565;Unigene0006211;Unigene0006742;Unigene0006883;Unigene0007516;Unigene0007645;Unigene0008534;Unigene0009026;Unigene0009466;Unigene0009981;Unigene0010186;Unigene0010773;Unigene0013153;Unigene00…
GO:2001141	regulation of RNA biosynthetic process	69	185	0.00350438	0.0380131	Unigene0000015;Unigene0000024;Unigene0000099;Unigene0000205;Unigene0000343;Unigene0000767;Unigene0002162;Unigene0002229;Unigene0003120;Unigene0003241;Unigene0003419;Unigene0004270;Unigene0004378;Unigene0005565;Unigene0006211;Unigene0006742;Unigene0006883;Unigene0007516;Unigene0007645;Unigene0008534;Unigene0009026;Unigene0009466;Unigene0009981;Unigene0010186;Unigene0010773;Unigene0013153;Unigene00…
GO:0006355	regulation of transcription, DNA-templated	68	182	0.00355461	0.0380131	Unigene0000015;Unigene0000024;Unigene0000099;Unigene0000205;Unigene0000343;Unigene0002162;Unigene0002229;Unigene0003120;Unigene0003241;Unigene0003419;Unigene0004270;Unigene0004378;Unigene0005565;Unigene0006211;Unigene0006742;Unigene0006883;Unigene0007516;Unigene0007645;Unigene0008534;Unigene0009026;Unigene0009466;Unigene0009981;Unigene0010186;Unigene0010773;Unigene0013153;Unigene0013726;Unigene00…
GO:1903506	regulation of nucleic acid-templated transcription	68	182	0.00355461	0.0380131	Unigene0000015;Unigene0000024;Unigene0000099;Unigene0000205;Unigene0000343;Unigene0002162;Unigene0002229;Unigene0003120;Unigene0003241;Unigene0003419;Unigene0004270;Unigene0004378;Unigene0005565;Unigene0006211;Unigene0006742;Unigene0006883;Unigene0007516;Unigene0007645;Unigene0008534;Unigene0009026;Unigene0009466;Unigene0009981;Unigene0010186;Unigene0010773;Unigene0013153;Unigene0013726;Unigene00…
GO:0006418	tRNA aminoacylation for protein translation	23	49	0.00360624	0.0382796	Unigene0000226;Unigene0000525;Unigene0000613;Unigene0002384;Unigene0003596;Unigene0004141;Unigene0004781;Unigene0012795;Unigene0014088;Unigene0018266;Unigene0019693;Unigene0019812;Unigene0021152;Unigene0032303;Unigene0032887;Unigene0033360;Unigene0033418;Unigene0036378;Unigene0036385;Unigene0038244;Unigene0038908;Unigene0039717;Unigene0040849
GO:0016071	mRNA metabolic process	15	28	0.00377997	0.0398286	Unigene0003021;Unigene0005888;Unigene0013450;Unigene0019564;Unigene0022699;Unigene0025533;Unigene0026313;Unigene0028647;Unigene0029425;Unigene0034013;Unigene0034282;Unigene0037527;Unigene0037539;Unigene0038223;Unigene0040250
GO:0009889	regulation of biosynthetic process	93	261	0.00388403	0.0406264	Unigene0000015;Unigene0000024;Unigene0000042;Unigene0000099;Unigene0000205;Unigene0000226;Unigene0000343;Unigene0000525;Unigene0000613;Unigene0000767;Unigene0002162;Unigene0002229;Unigene0003120;Unigene0003241;Unigene0003419;Unigene0004270;Unigene0004378;Unigene0005188;Unigene0005565;Unigene0006211;Unigene0006742;Unigene0006883;Unigene0007516;Unigene0007645;Unigene0008534;Unigene0009026;Unigene00…
GO:0006753	nucleoside phosphate metabolic process	78	214	0.00403756	0.0419263	Unigene0000108;Unigene0001041;Unigene0001716;Unigene0002418;Unigene0002702;Unigene0002918;Unigene0002930;Unigene0003120;Unigene0003122;Unigene0003160;Unigene0003810;Unigene0003815;Unigene0003842;Unigene0004244;Unigene0004270;Unigene0005121;Unigene0005280;Unigene0005947;Unigene0007432;Unigene0008058;Unigene0008117;Unigene0008717;Unigene0009466;Unigene0009524;Unigene0013153;Unigene0014576;Unigene00…
GO:0070085	glycosylation	21	44	0.00416061	0.0428932	Unigene0000069;Unigene0000566;Unigene0005285;Unigene0009808;Unigene0010031;Unigene0021373;Unigene0021596;Unigene0025499;Unigene0028199;Unigene0030983;Unigene0032353;Unigene0033984;Unigene0037699;Unigene0038223;Unigene0038820;Unigene0039157;Unigene0039868;Unigene0040238;Unigene0041724;Unigene0042038;Unigene0042624
GO:0061024	membrane organization	43	107	0.00420321	0.0430229	Unigene0000024;Unigene0002922;Unigene0002930;Unigene0005121;Unigene0005808;Unigene0009981;Unigene0010773;Unigene0011058;Unigene0011139;Unigene0012795;Unigene0013153;Unigene0013643;Unigene0013726;Unigene0016019;Unigene0017647;Unigene0020980;Unigene0021735;Unigene0022131;Unigene0022699;Unigene0022868;Unigene0023389;Unigene0023865;Unigene0028295;Unigene0028305;Unigene0031227;Unigene0031237;Unigene00…
GO:0046496	nicotinamide nucleotide metabolic process	26	58	0.00445863	0.0453136	Unigene0001716;Unigene0002702;Unigene0004270;Unigene0005121;Unigene0008717;Unigene0009524;Unigene0013153;Unigene0016175;Unigene0018577;Unigene0020980;Unigene0022679;Unigene0022868;Unigene0026039;Unigene0030755;Unigene0032499;Unigene0033803;Unigene0033829;Unigene0034154;Unigene0034408;Unigene0035178;Unigene0036313;Unigene0037134;Unigene0040547;Unigene0041019;Unigene0041794;Unigene0042591
GO:0019318	hexose metabolic process	33	78	0.00453	0.0457147	Unigene0000092;Unigene0000116;Unigene0000566;Unigene0000569;Unigene0008033;Unigene0008524;Unigene0009031;Unigene0010185;Unigene0010482;Unigene0010823;Unigene0014654;Unigene0017173;Unigene0020651;Unigene0020977;Unigene0021373;Unigene0021484;Unigene0022586;Unigene0022679;Unigene0026638;Unigene0026688;Unigene0030755;Unigene0032158;Unigene0032679;Unigene0032861;Unigene0033289;Unigene0033888;Unigene00…
GO:0009081	branched-chain amino acid metabolic process	12	21	0.00474013	0.0475008	Unigene0000116;Unigene0002702;Unigene0007350;Unigene0008606;Unigene0009524;Unigene0012939;Unigene0026828;Unigene0032238;Unigene0035755;Unigene0035821;Unigene0035880;Unigene0037134
GO:0006401	RNA catabolic process	9	14	0.00500858	0.0495391	Unigene0003021;Unigene0008585;Unigene0019564;Unigene0022699;Unigene0029425;Unigene0037527;Unigene0037539;Unigene0038223;Unigene0040250
GO:0016072	rRNA metabolic process	39	96	0.00501268	0.0495391	Unigene0000099;Unigene0000480;Unigene0001041;Unigene0002542;Unigene0002922;Unigene0005121;Unigene0005888;Unigene0006336;Unigene0007786;Unigene0008717;Unigene0009327;Unigene0010773;Unigene0011043;Unigene0012795;Unigene0013153;Unigene0013726;Unigene0014981;Unigene0017945;Unigene0019622;Unigene0020250;Unigene0020980;Unigene0021484;Unigene0021735;Unigene0022868;Unigene0026105;Unigene0028295;Unigene00…
GO:0006461	protein complex assembly	57	151	0.00562343	0.0551943	Unigene0000024;Unigene0000550;Unigene0001690;Unigene0001792;Unigene0002542;Unigene0003120;Unigene0004635;Unigene0005025;Unigene0005413;Unigene0006211;Unigene0009026;Unigene0009031;Unigene0010633;Unigene0011900;Unigene0012010;Unigene0013726;Unigene0014074;Unigene0014439;Unigene0014734;Unigene0014894;Unigene0014981;Unigene0015094;Unigene0015797;Unigene0016287;Unigene0017095;Unigene0019490;Unigene00…
GO:0009658	chloroplast organization	21	45	0.00577405	0.0562872	Unigene0000024;Unigene0002930;Unigene0005121;Unigene0010773;Unigene0011058;Unigene0013153;Unigene0013726;Unigene0016019;Unigene0020980;Unigene0021735;Unigene0022868;Unigene0023775;Unigene0028295;Unigene0031227;Unigene0032431;Unigene0032499;Unigene0032886;Unigene0033168;Unigene0033418;Unigene0037094;Unigene0037594
GO:0009404	toxin metabolic process	15	29	0.00582657	0.0564154	Unigene0000099;Unigene0003429;Unigene0004635;Unigene0006334;Unigene0014216;Unigene0014734;Unigene0024011;Unigene0024934;Unigene0030253;Unigene0032302;Unigene0034535;Unigene0036700;Unigene0036818;Unigene0039669;Unigene0042289
GO:0031323	regulation of cellular metabolic process	122	358	0.00599074	0.0576157	Unigene0000015;Unigene0000024;Unigene0000042;Unigene0000099;Unigene0000205;Unigene0000226;Unigene0000343;Unigene0000525;Unigene0000613;Unigene0000767;Unigene0002162;Unigene0002229;Unigene0003120;Unigene0003241;Unigene0003419;Unigene0003810;Unigene0004192;Unigene0004270;Unigene0004378;Unigene0004771;Unigene0005188;Unigene0005197;Unigene0005508;Unigene0005565;Unigene0006211;Unigene0006742;Unigene00…
GO:0009101	glycoprotein biosynthetic process	18	37	0.00603888	0.0576915	Unigene0000069;Unigene0000566;Unigene0000672;Unigene0005285;Unigene0009808;Unigene0010031;Unigene0012719;Unigene0021373;Unigene0021596;Unigene0025499;Unigene0028199;Unigene0032353;Unigene0033984;Unigene0037699;Unigene0038223;Unigene0039868;Unigene0040238;Unigene0042624
GO:0016441	posttranscriptional gene silencing	19	40	0.00670246	0.0636068	Unigene0000042;Unigene0003419;Unigene0005565;Unigene0005888;Unigene0006883;Unigene0010186;Unigene0010791;Unigene0011986;Unigene0014353;Unigene0020442;Unigene0020716;Unigene0021485;Unigene0023103;Unigene0023389;Unigene0027309;Unigene0031998;Unigene0033598;Unigene0033932;Unigene0038223
GO:0044283	small molecule biosynthetic process	78	218	0.00689978	0.0650486	Unigene0000042;Unigene0000092;Unigene0000116;Unigene0000707;Unigene0001416;Unigene0001722;Unigene0002536;Unigene0002855;Unigene0003005;Unigene0003021;Unigene0003149;Unigene0003352;Unigene0003432;Unigene0003978;Unigene0004270;Unigene0004419;Unigene0004584;Unigene0004585;Unigene0004967;Unigene0005826;Unigene0005837;Unigene0006211;Unigene0006319;Unigene0007609;Unigene0007636;Unigene0007995;Unigene00…
GO:0006206	pyrimidine nucleobase metabolic process	7	10	0.00700048	0.0655665	Unigene0001893;Unigene0002918;Unigene0014576;Unigene0029216;Unigene0039382;Unigene0039612;Unigene0041654
GO:0051641	cellular localization	105	305	0.00742633	0.0691035	Unigene0000055;Unigene0000059;Unigene0000069;Unigene0000498;Unigene0001041;Unigene0001464;Unigene0001529;Unigene0002027;Unigene0002415;Unigene0002474;Unigene0002497;Unigene0002545;Unigene0002797;Unigene0003094;Unigene0003128;Unigene0003336;Unigene0003355;Unigene0003510;Unigene0003795;Unigene0003856;Unigene0004050;Unigene0004270;Unigene0004558;Unigene0004638;Unigene0004967;Unigene0004982;Unigene00…
GO:0006188	IMP biosynthetic process	6	8	0.00781045	0.071746	Unigene0003122;Unigene0020504;Unigene0033014;Unigene0033042;Unigene0034165;Unigene0037736
GO:0046040	IMP metabolic process	6	8	0.00781045	0.071746	Unigene0003122;Unigene0020504;Unigene0033014;Unigene0033042;Unigene0034165;Unigene0037736
GO:0022406	membrane docking	5	6	0.00792111	0.072299	Unigene0001464;Unigene0019415;Unigene0023428;Unigene0036016;Unigene0036870
GO:1901615	organic hydroxy compound metabolic process	54	144	0.00803775	0.0728993	Unigene0000707;Unigene0001588;Unigene0002903;Unigene0003005;Unigene0004270;Unigene0004291;Unigene0004967;Unigene0005174;Unigene0005837;Unigene0006211;Unigene0007350;Unigene0007995;Unigene0008419;Unigene0008606;Unigene0009217;Unigene0009466;Unigene0011505;Unigene0013138;Unigene0014095;Unigene0014594;Unigene0015714;Unigene0016214;Unigene0016628;Unigene0017350;Unigene0018245;Unigene0020716;Unigene00…
GO:0032502	developmental process	243	764	0.0084987	0.0762878	Unigene0000042;Unigene0000097;Unigene0000099;Unigene0000108;Unigene0000119;Unigene0000127;Unigene0000233;Unigene0000241;Unigene0000252;Unigene0000498;Unigene0000581;Unigene0000591;Unigene0000592;Unigene0000660;Unigene0000667;Unigene0000747;Unigene0000902;Unigene0000935;Unigene0001210;Unigene0001283;Unigene0001351;Unigene0001353;Unigene0001677;Unigene0001732;Unigene0001792;Unigene0002162;Unigene00…
GO:0009100	glycoprotein metabolic process	18	38	0.00851783	0.0762878	Unigene0000069;Unigene0000566;Unigene0000672;Unigene0005285;Unigene0009808;Unigene0010031;Unigene0012719;Unigene0021373;Unigene0021596;Unigene0025499;Unigene0028199;Unigene0032353;Unigene0033984;Unigene0037699;Unigene0038223;Unigene0039868;Unigene0040238;Unigene0042624
GO:0071822	protein complex subunit organization	73	204	0.00872713	0.0776768	Unigene0000024;Unigene0000097;Unigene0000099;Unigene0000550;Unigene0001690;Unigene0001792;Unigene0002162;Unigene0002542;Unigene0003120;Unigene0004635;Unigene0005025;Unigene0005413;Unigene0005637;Unigene0006211;Unigene0008727;Unigene0009026;Unigene0009031;Unigene0010633;Unigene0011900;Unigene0012010;Unigene0013726;Unigene0014074;Unigene0014439;Unigene0014704;Unigene0014734;Unigene0014894;Unigene00…
GO:0016053	organic acid biosynthetic process	61	167	0.00967961	0.0848048	Unigene0000042;Unigene0000092;Unigene0000116;Unigene0001416;Unigene0001722;Unigene0002536;Unigene0002855;Unigene0003021;Unigene0003149;Unigene0003352;Unigene0003432;Unigene0003978;Unigene0004270;Unigene0004419;Unigene0004584;Unigene0004585;Unigene0004967;Unigene0005826;Unigene0006319;Unigene0007636;Unigene0008534;Unigene0009192;Unigene0009466;Unigene0009524;Unigene0009833;Unigene0009981;Unigene00…
GO:0046394	carboxylic acid biosynthetic process	61	167	0.00967961	0.0848048	Unigene0000042;Unigene0000092;Unigene0000116;Unigene0001416;Unigene0001722;Unigene0002536;Unigene0002855;Unigene0003021;Unigene0003149;Unigene0003352;Unigene0003432;Unigene0003978;Unigene0004270;Unigene0004419;Unigene0004584;Unigene0004585;Unigene0004967;Unigene0005826;Unigene0006319;Unigene0007636;Unigene0008534;Unigene0009192;Unigene0009466;Unigene0009524;Unigene0009833;Unigene0009981;Unigene00…
GO:0006486	protein glycosylation	16	33	0.00981122	0.0848048	Unigene0000069;Unigene0000566;Unigene0005285;Unigene0009808;Unigene0010031;Unigene0021373;Unigene0021596;Unigene0025499;Unigene0028199;Unigene0032353;Unigene0033984;Unigene0037699;Unigene0038223;Unigene0039868;Unigene0040238;Unigene0042624
GO:0043413	macromolecule glycosylation	16	33	0.00981122	0.0848048	Unigene0000069;Unigene0000566;Unigene0005285;Unigene0009808;Unigene0010031;Unigene0021373;Unigene0021596;Unigene0025499;Unigene0028199;Unigene0032353;Unigene0033984;Unigene0037699;Unigene0038223;Unigene0039868;Unigene0040238;Unigene0042624
GO:0051276	chromosome organization	79	224	0.00982387	0.0848048	Unigene0000233;Unigene0000324;Unigene0000660;Unigene0000935;Unigene0001351;Unigene0001844;Unigene0002162;Unigene0002229;Unigene0003120;Unigene0003363;Unigene0003419;Unigene0004833;Unigene0004977;Unigene0005197;Unigene0005565;Unigene0006382;Unigene0006883;Unigene0007645;Unigene0008320;Unigene0008534;Unigene0008727;Unigene0009026;Unigene0009065;Unigene0009518;Unigene0010186;Unigene0011251;Unigene00…
GO:0034655	nucleobase-containing compound catabolic process	11	20	0.00994916	0.0853722	Unigene0003021;Unigene0006935;Unigene0008585;Unigene0019564;Unigene0022699;Unigene0026535;Unigene0029425;Unigene0037527;Unigene0037539;Unigene0038223;Unigene0040250
GO:0048518	positive regulation of biological process	42	109	0.0108142	0.0918772	Unigene0002729;Unigene0002843;Unigene0004192;Unigene0004378;Unigene0004771;Unigene0005025;Unigene0005508;Unigene0007645;Unigene0008369;Unigene0009026;Unigene0012519;Unigene0014981;Unigene0015058;Unigene0015406;Unigene0016765;Unigene0018283;Unigene0019379;Unigene0022868;Unigene0023467;Unigene0024011;Unigene0027095;Unigene0029734;Unigene0030253;Unigene0030755;Unigene0031237;Unigene0031329;Unigene00…
GO:0035194	posttranscriptional gene silencing by RNA	17	36	0.0108355	0.0918772	Unigene0000042;Unigene0003419;Unigene0005565;Unigene0005888;Unigene0006883;Unigene0010186;Unigene0010791;Unigene0011986;Unigene0020442;Unigene0021485;Unigene0023103;Unigene0023389;Unigene0027309;Unigene0031998;Unigene0033598;Unigene0033932;Unigene0038223
GO:0006402	mRNA catabolic process	8	13	0.0117839	0.0993316	Unigene0003021;Unigene0019564;Unigene0022699;Unigene0029425;Unigene0037527;Unigene0037539;Unigene0038223;Unigene0040250
GO:0009746	response to hexose	12	23	0.0122049	0.101684	Unigene0008024;Unigene0015858;Unigene0017712;Unigene0022438;Unigene0027095;Unigene0027853;Unigene0029178;Unigene0029361;Unigene0029749;Unigene0033192;Unigene0037924;Unigene0040398
GO:0034284	response to monosaccharide	12	23	0.0122049	0.101684	Unigene0008024;Unigene0015858;Unigene0017712;Unigene0022438;Unigene0027095;Unigene0027853;Unigene0029178;Unigene0029361;Unigene0029749;Unigene0033192;Unigene0037924;Unigene0040398
GO:0006886	intracellular protein transport	69	194	0.0122932	0.101827	Unigene0000055;Unigene0000498;Unigene0001041;Unigene0001464;Unigene0001529;Unigene0002027;Unigene0002415;Unigene0002545;Unigene0002797;Unigene0003094;Unigene0003128;Unigene0003336;Unigene0003355;Unigene0003795;Unigene0004270;Unigene0004558;Unigene0004638;Unigene0004967;Unigene0006334;Unigene0006359;Unigene0007521;Unigene0008075;Unigene0008320;Unigene0009196;Unigene0009466;Unigene0009981;Unigene00…
GO:0051649	establishment of localization in cell	97	284	0.0124341	0.102403	Unigene0000055;Unigene0000059;Unigene0000069;Unigene0000498;Unigene0001041;Unigene0001464;Unigene0001529;Unigene0002027;Unigene0002415;Unigene0002474;Unigene0002545;Unigene0002797;Unigene0003094;Unigene0003128;Unigene0003336;Unigene0003355;Unigene0003510;Unigene0003795;Unigene0003856;Unigene0004270;Unigene0004558;Unigene0004638;Unigene0004967;Unigene0004982;Unigene0006334;Unigene0006359;Unigene00…
GO:0009743	response to carbohydrate	28	68	0.0130037	0.106463	Unigene0002162;Unigene0002682;Unigene0003419;Unigene0004270;Unigene0008024;Unigene0008717;Unigene0009466;Unigene0010482;Unigene0015858;Unigene0017712;Unigene0019564;Unigene0022438;Unigene0027095;Unigene0027117;Unigene0027853;Unigene0028647;Unigene0029178;Unigene0029361;Unigene0029749;Unigene0032074;Unigene0032349;Unigene0033192;Unigene0034165;Unigene0037924;Unigene0038143;Unigene0038938;Unigene00…
GO:0010608	posttranscriptional regulation of gene expression	39	101	0.0131943	0.106463	Unigene0000042;Unigene0000226;Unigene0000525;Unigene0000613;Unigene0003355;Unigene0003419;Unigene0004270;Unigene0005188;Unigene0005565;Unigene0005888;Unigene0006883;Unigene0009754;Unigene0010186;Unigene0010791;Unigene0011986;Unigene0012795;Unigene0014353;Unigene0019622;Unigene0020442;Unigene0020716;Unigene0020839;Unigene0020980;Unigene0021153;Unigene0021485;Unigene0022153;Unigene0023103;Unigene00…
GO:0019941	modification-dependent protein catabolic process	38	98	0.0132809	0.106463	Unigene0000064;Unigene0000304;Unigene0001792;Unigene0002210;Unigene0004558;Unigene0004635;Unigene0007694;Unigene0008149;Unigene0009026;Unigene0009031;Unigene0009808;Unigene0011983;Unigene0012010;Unigene0012926;Unigene0013201;Unigene0014734;Unigene0015094;Unigene0017382;Unigene0019367;Unigene0019388;Unigene0022963;Unigene0026574;Unigene0027117;Unigene0028219;Unigene0033003;Unigene0033723;Unigene00…
GO:0043632	modification-dependent macromolecule catabolic process	38	98	0.0132809	0.106463	Unigene0000064;Unigene0000304;Unigene0001792;Unigene0002210;Unigene0004558;Unigene0004635;Unigene0007694;Unigene0008149;Unigene0009026;Unigene0009031;Unigene0009808;Unigene0011983;Unigene0012010;Unigene0012926;Unigene0013201;Unigene0014734;Unigene0015094;Unigene0017382;Unigene0019367;Unigene0019388;Unigene0022963;Unigene0026574;Unigene0027117;Unigene0028219;Unigene0033003;Unigene0033723;Unigene00…
GO:1901605	alpha-amino acid metabolic process	59	163	0.0132986	0.106463	Unigene0000042;Unigene0000092;Unigene0000116;Unigene0001353;Unigene0002702;Unigene0003122;Unigene0003978;Unigene0004270;Unigene0004585;Unigene0004967;Unigene0005826;Unigene0007350;Unigene0007625;Unigene0007636;Unigene0008606;Unigene0009192;Unigene0009241;Unigene0009466;Unigene0010301;Unigene0010622;Unigene0011019;Unigene0011489;Unigene0011723;Unigene0012939;Unigene0013133;Unigene0014894;Unigene00…
GO:0006089	lactate metabolic process	13	26	0.014236	0.113335	Unigene0002903;Unigene0005174;Unigene0007350;Unigene0008419;Unigene0008606;Unigene0014095;Unigene0016214;Unigene0028025;Unigene0032074;Unigene0034094;Unigene0036818;Unigene0038852;Unigene0039801
GO:0006006	glucose metabolic process	22	51	0.014418	0.114149	Unigene0000092;Unigene0000116;Unigene0000569;Unigene0009031;Unigene0010482;Unigene0010823;Unigene0014654;Unigene0017173;Unigene0020651;Unigene0021373;Unigene0021484;Unigene0022586;Unigene0022679;Unigene0026638;Unigene0032861;Unigene0033888;Unigene0035565;Unigene0035755;Unigene0035821;Unigene0036016;Unigene0039518;Unigene0042660
GO:0006739	NADP metabolic process	23	54	0.0148693	0.117075	Unigene0001716;Unigene0002702;Unigene0004270;Unigene0005121;Unigene0008717;Unigene0009524;Unigene0013153;Unigene0016175;Unigene0018577;Unigene0020980;Unigene0022679;Unigene0022868;Unigene0026039;Unigene0030755;Unigene0032499;Unigene0033803;Unigene0033829;Unigene0034154;Unigene0034408;Unigene0037134;Unigene0040547;Unigene0041794;Unigene0042591
GO:1902589	single-organism organelle organization	93	273	0.0152486	0.119406	Unigene0000097;Unigene0000099;Unigene0000233;Unigene0000324;Unigene0000498;Unigene0000935;Unigene0001351;Unigene0002162;Unigene0003120;Unigene0003128;Unigene0003363;Unigene0003795;Unigene0004558;Unigene0004638;Unigene0004787;Unigene0004833;Unigene0004977;Unigene0005025;Unigene0005197;Unigene0005637;Unigene0006382;Unigene0007645;Unigene0008075;Unigene0008320;Unigene0008534;Unigene0009026;Unigene00…
GO:1902582	single-organism intracellular transport	70	199	0.0153939	0.119889	Unigene0000498;Unigene0001464;Unigene0001529;Unigene0002027;Unigene0002415;Unigene0002474;Unigene0002545;Unigene0002797;Unigene0003128;Unigene0003336;Unigene0003510;Unigene0003795;Unigene0003856;Unigene0004270;Unigene0004558;Unigene0004638;Unigene0004967;Unigene0006334;Unigene0006359;Unigene0007521;Unigene0008075;Unigene0008320;Unigene0009196;Unigene0009466;Unigene0009981;Unigene0010456;Unigene00…
GO:0046907	intracellular transport	96	283	0.0156407	0.121152	Unigene0000055;Unigene0000059;Unigene0000069;Unigene0000498;Unigene0001041;Unigene0001464;Unigene0001529;Unigene0002027;Unigene0002415;Unigene0002474;Unigene0002545;Unigene0002797;Unigene0003094;Unigene0003128;Unigene0003336;Unigene0003355;Unigene0003510;Unigene0003795;Unigene0003856;Unigene0004270;Unigene0004558;Unigene0004638;Unigene0004967;Unigene0004982;Unigene0006334;Unigene0006359;Unigene00…
[truncated: 1,249 more rows]

## Sheet: MY
GO analysis result for single-copy genes in Chaenomeles cathayensis(MY)
GO ID	Description	out (2239)	All (7842)	pvalue	p.adjust	Genes
[truncated: 1,429 more rows]

## Sheet: MYXZ
GO analysis result for single-copy genes in Chaenomeles thibetica(MYXZ)
[truncated: 1,457 more rows]

## Sheet: RB
GO analysis result for single-copy genes in Chaenomeles japonica(RB)
[truncated: 1,442 more rows]

[truncated: 6 more sheets: XZ, XZSS, ZPCA, ZPLP, ZPLY, ZPXC]
