# Supplementary material for: Comparative transcriptomics provides a strategy for phylogenetic analysis and SSR marker development in Chaenomeles
Source: Sci Rep. 2021 Aug 12;11:16441. doi: 10.1038/s41598-021-95776-z (PMC8361139; doi:10.1038/s41598-021-95776-z)
Supplement: Supplementary file 5 — Supplementary Table S4. [file 41598_2021_95776_MOESM5_ESM.xlsx]

## Sheet: DY
KEGG analysis result for single-copy genes in Docynia delavayi(DY)
Pathway	out (1526)	All (6217)	Pvalue	Qvalue	Pathway ID	Genes	K_IDs
Non-homologous end-joining	8	8	1.29946e-05	0.00167631	ko03450	Unigene0001718;Unigene0010885;Unigene0014781;Unigene0015601;Unigene0020901;Unigene0023579;Unigene0023987;Unigene0035514	K10886+K10866+K03512+K10865+K10777+K10884+K04799+K10885
Ribosome biogenesis in eukaryotes	39	98	0.000553641	0.0323186	ko03008	Unigene0000424;Unigene0000443;Unigene0001139;Unigene0001140;Unigene0001902;Unigene0002854;Unigene0003841;Unigene0004547;Unigene0004641;Unigene0006926;Unigene0007482;Unigene0007589;Unigene0009321;Unigene0010839;Unigene0010932;Unigene0010947;Unigene0011100;Unigene0013991;Unigene0015048;Unigene0017838;Unigene0019287;Unigene0020221;Unigene0020251;Unigene0020893;Unigene0020905;Unigene0021234;Unigene00…	K14565+K14573+K14550+K11108+K14521+K14569+K14290+K14558+K11131+K06943+K14563+K14571+K03538+K12619+K01164+K14566+K14538+K14567+K03539+K14552+K14559+K14560+K14556+K07562+K06943+K14536+K07936+K11130+K14548+K14537+K14554+K03537+K14561+K14574+K14572+K14549+K14546+K14568+K03097
Biosynthesis of amino acids	97	297	0.000751594	0.0323186	ko01230	Unigene0000169;Unigene0000194;Unigene0001316;Unigene0001587;Unigene0001629;Unigene0002530;Unigene0003614;Unigene0003990;Unigene0005122;Unigene0005970;Unigene0005999;Unigene0006374;Unigene0006375;Unigene0006724;Unigene0006933;Unigene0007998;Unigene0008854;Unigene0009650;Unigene0010007;Unigene0011540;Unigene0011670;Unigene0012030;Unigene0012428;Unigene0012835;Unigene0013709;Unigene0014703;Unigene00…	K00134+K00264+K01714+K01754+K01703+K01803+K00814+K01704+K00616+K14272+K01663+K01834+K01834+K00928+K00873+K00286+K01817+K00031+K01760+K00145+K18649+K00873+K01653+K13034+K00030+K11755+K15227+K00600+K00817+K01695+K00826+K00616+K01915+K00811+K01620+K00818+K00850+K01649+K00873+K10206+K01783+K00053+K01739+K14454+K00800+K01733+K00640+K05359+K00815+K00640+K01689+K01696+K01814+K01626+K01626+K15227+K14455+…
Purine metabolism	74	220	0.00126663	0.0398154	ko00230	Unigene0000113;Unigene0000150;Unigene0000429;Unigene0000432;Unigene0001524;Unigene0002207;Unigene0002783;Unigene0003362;Unigene0003687;Unigene0004266;Unigene0004840;Unigene0005417;Unigene0005989;Unigene0006933;Unigene0008738;Unigene0008999;Unigene0009999;Unigene0010348;Unigene0011851;Unigene0012030;Unigene0012094;Unigene0012431;Unigene0014179;Unigene0016407;Unigene0016547;Unigene0017302;Unigene00…	K03023+K03006+K02327+K03504+K14641+K01490+K02335+K03787+K00764+K01510+K01081+K02326+K06928+K00873+K00939+K01488+K00602+K01427+K03010+K00873+K03015+K02328+K03025+K00951+K01517+K03506+K03016+K01951+K10807+K00365+K18447+K00873+K11808+K03026+K00939+K03017+K00962+K03019+K03021+K01519+K03012+K13484+K00939+K00873+K00873+K01952+K14977+K02083+K01835+K00106+K03020+K01490+K01939+K03505+K03505+K10808+K03002+…
Spliceosome	88	272	0.00179485	0.0398154	ko03040	Unigene0000131;Unigene0000179;Unigene0000317;Unigene0000339;Unigene0000480;Unigene0000515;Unigene0000545;Unigene0001043;Unigene0002225;Unigene0002630;Unigene0003867;Unigene0003967;Unigene0005426;Unigene0006543;Unigene0006560;Unigene0007064;Unigene0007187;Unigene0009256;Unigene0009696;Unigene0009740;Unigene0010668;Unigene0011353;Unigene0011857;Unigene0012855;Unigene0013442;Unigene0014309;Unigene00…	K12823+K12818+K12852+K12896+K11984+K12820+K12855+K12856+K13025+K11087+K12879+K12741+K12823+K11099+K12822+K12826+K12833+K12896+K12825+K12893+K12877+K12844+K03283+K12741+K12876+K12860+K12741+K12842+K12823+K11094+K12818+K03283+K12623+K12865+K12837+K03283+K06063+K12821+K12741+K12812+K12831+K12861+K12836+K12830+K12818+K11088+K12836+K12875+K12878+K12868+K12839+K12828+K12831+K12857+K11097+K03283+K12829+…
Vitamin B6 metabolism	9	14	0.00185188	0.0398154	ko00750	Unigene0004953;Unigene0021825;Unigene0024016;Unigene0034131;Unigene0035417;Unigene0036548;Unigene0038476;Unigene0039911;Unigene0040882	K08681+K00868+K01733+K00831+K00275+K06215+K01733+K00275+K05275
Base excision repair	24	59	0.00440702	0.0803202	ko03410	Unigene0000429;Unigene0000432;Unigene0002783;Unigene0005417;Unigene0007450;Unigene0009398;Unigene0012431;Unigene0014074;Unigene0014704;Unigene0014781;Unigene0015450;Unigene0017302;Unigene0018532;Unigene0023987;Unigene0027780;Unigene0028263;Unigene0034534;Unigene0035020;Unigene0035633;Unigene0035635;Unigene0035904;Unigene0037439;Unigene0037940;Unigene0038642	K02327+K03504+K02335+K02326+K01246+K10801+K02328+K01247+K03648+K03512+K04802+K03506+K10747+K04799+K03660+K01247+K03575+K10773+K03505+K03505+K10747+K01246+K01142+K10803
Aminoacyl-tRNA biosynthesis	31	82	0.0049811	0.0803202	ko00970	Unigene0006680;Unigene0006876;Unigene0009219;Unigene0010005;Unigene0010841;Unigene0012519;Unigene0012755;Unigene0012975;Unigene0013191;Unigene0014255;Unigene0014358;Unigene0015084;Unigene0020958;Unigene0022650;Unigene0025673;Unigene0033001;Unigene0034319;Unigene0034715;Unigene0034954;Unigene0038066;Unigene0038477;Unigene0038513;Unigene0038913;Unigene0038969;Unigene0039084;Unigene0039524;Unigene00…	K01872+K01869+K01893+K01873+K02434+K01881+K01874+K01869+K01872+K01893+K01868+K04567+K01886+K01866+K01868+K01876+K01873+K00604+K01887+K01874+K01890+K01880+K01883+K01870+K01867+K01883+K01889+K01875+K01875+K01889+K14164
Terpenoid backbone biosynthesis	22	54	0.00613914	0.0879944	ko00900	Unigene0000453;Unigene0000976;Unigene0005050;Unigene0006198;Unigene0006864;Unigene0009354;Unigene0010384;Unigene0016529;Unigene0020438;Unigene0020570;Unigene0020973;Unigene0021418;Unigene0026891;Unigene0030161;Unigene0030917;Unigene0033122;Unigene0033921;Unigene0034827;Unigene0035509;Unigene0036550;Unigene0037699;Unigene0040227	K13789+K01662+K10960+K00991+K05955+K01597+K03526+K00099+K00021+K01823+K01662+K05356+K11778+K15891+K00919+K11778+K11778+K06013+K05906+K13789+K01641+K00021
N-Glycan biosynthesis	24	61	0.00721989	0.0931366	ko00510	Unigene0000422;Unigene0001728;Unigene0003293;Unigene0004274;Unigene0007372;Unigene0013352;Unigene0020344;Unigene0025710;Unigene0030272;Unigene0032926;Unigene0034297;Unigene0034741;Unigene0035060;Unigene0035178;Unigene0036651;Unigene0036684;Unigene0036901;Unigene0037160;Unigene0038945;Unigene0039556;Unigene0040127;Unigene0040280;Unigene0040471;Unigene0041693	K12670+K07432+K03849+K01231+K03847+K07151+K00729+K05546+K12667+K01230+K03850+K03842+K00721+K00737+K03849+K01228+K12666+K00737+K00902+K09658+K03843+K03846+K00737+K00726
Proteasome	25	65	0.00862713	0.101173	ko03050	Unigene0000065;Unigene0000109;Unigene0000183;Unigene0003590;Unigene0003882;Unigene0004107;Unigene0004767;Unigene0006618;Unigene0008336;Unigene0013522;Unigene0015208;Unigene0020170;Unigene0021353;Unigene0021430;Unigene0021955;Unigene0021965;Unigene0027552;Unigene0033073;Unigene0034100;Unigene0034770;Unigene0035802;Unigene0036220;Unigene0039472;Unigene0039815;Unigene0041752	K03037+K03033+K06699+K03063+K02731+K02729+K02730+K03062+K03065+K03039+K03031+K02739+K03066+K03033+K02727+K06700+K10881+K03036+K02726+K06691+K03029+K03030+K02735+K03064+K03028
Galactose metabolism	23	59	0.00958428	0.103031	ko00052	Unigene0002007;Unigene0002944;Unigene0005316;Unigene0005743;Unigene0005783;Unigene0013399;Unigene0014468;Unigene0016488;Unigene0017692;Unigene0019474;Unigene0020520;Unigene0020913;Unigene0023246;Unigene0026647;Unigene0031858;Unigene0033391;Unigene0034588;Unigene0035095;Unigene0036933;Unigene0037023;Unigene0039499;Unigene0039842;Unigene0040653	K12447+K00963+K00963+K01784+K01785+K18819+K18819+K01187+K00844+K06617+K00965+K00850+K06617+K01190+K01193+K00850+K01835+K06617+K12309+K07407+K06617+K00850+K01835
RNA transport	78	253	0.0121188	0.120255	ko03013	Unigene0000020;Unigene0000485;Unigene0000999;Unigene0001129;Unigene0001655;Unigene0001748;Unigene0002225;Unigene0002406;Unigene0002821;Unigene0002977;Unigene0003035;Unigene0003412;Unigene0003577;Unigene0003841;Unigene0003867;Unigene0004194;Unigene0005376;Unigene0005757;Unigene0006101;Unigene0006881;Unigene0008502;Unigene0009149;Unigene0009321;Unigene0010153;Unigene0010535;Unigene0010668;Unigene00…	K09291+K14301+K14289+K14309+K03240+K03257+K13025+K03241+K03680+K14312+K14321+K03250+K14327+K14290+K12879+K03239+K13151+K13114+K03236+K03262+K00784+K14293+K03538+K03252+K14319+K12877+K01164+K03113+K03243+K12876+K14298+K03539+K14314+K14318+K14299+K12812+K14304+K07562+K07936+K18213+K14319+K03260+K12875+K03246+K13126+K12878+K14300+K03247+K03260+K03537+K14310+K05019+K14291+K03254+K03253+K03680+K12882+…
2-Oxocarboxylic acid metabolism	28	78	0.0160202	0.147615	ko01210	Unigene0001629;Unigene0003614;Unigene0003990;Unigene0005970;Unigene0006724;Unigene0008654;Unigene0009650;Unigene0011540;Unigene0012428;Unigene0013709;Unigene0017966;Unigene0018150;Unigene0020134;Unigene0020446;Unigene0022001;Unigene0022572;Unigene0023605;Unigene0028310;Unigene0028514;Unigene0030006;Unigene0031637;Unigene0032286;Unigene0033383;Unigene0033839;Unigene0034265;Unigene0036673;Unigene00…	K01703+K00814+K01704+K14272+K00928+K11820+K00031+K00145+K01653+K00030+K11820+K00826+K00811+K00818+K01649+K00053+K14454+K14455+K00930+K01687+K01647+K01647+K00031+K14682+K00052+K00826+K00031+K14677
Folate biosynthesis	12	27	0.0185423	0.159464	ko00790	Unigene0001479;Unigene0004077;Unigene0020604;Unigene0022284;Unigene0026085;Unigene0033872;Unigene0035224;Unigene0035341;Unigene0036527;Unigene0037384;Unigene0038206;Unigene0039419	K03637+K20457+K18482+K15631+K01724+K13998+K01930+K00079+K01930+K18482+K15376+K13941
Thiamine metabolism	11	25	0.0258147	0.208131	ko00730	Unigene0000976;Unigene0004052;Unigene0005989;Unigene0008738;Unigene0020973;Unigene0024448;Unigene0033971;Unigene0034436;Unigene0035279;Unigene0038167;Unigene0038922	K01662+K00878+K06928+K00939+K01662+K00939+K00939+K06949+K00949+K14153+K00939
Pentose phosphate pathway	25	72	0.0333586	0.245809	ko00030	Unigene0003870;Unigene0005122;Unigene0007952;Unigene0008241;Unigene0013312;Unigene0019111;Unigene0019830;Unigene0020913;Unigene0022233;Unigene0032791;Unigene0033014;Unigene0033391;Unigene0034588;Unigene0035501;Unigene0037268;Unigene0037800;Unigene0038400;Unigene0038914;Unigene0039436;Unigene0039476;Unigene0039597;Unigene0039842;Unigene0040457;Unigene0040653;Unigene0041242	K00852+K00616+K00131+K00033+K00036+K00616+K03841+K00850+K01783+K00036+K01057+K00850+K01835+K01623+K01057+K03841+K01807+K03841+K00033+K01810+K00948+K00850+K00895+K01835+K00615
Nucleotide excision repair	36	111	0.0358937	0.245809	ko03420	Unigene0000040;Unigene0000220;Unigene0000305;Unigene0000429;Unigene0000432;Unigene0002783;Unigene0004486;Unigene0004685;Unigene0005417;Unigene0008199;Unigene0009296;Unigene0010103;Unigene0012431;Unigene0012911;Unigene0015450;Unigene0017302;Unigene0017346;Unigene0018532;Unigene0020535;Unigene0020838;Unigene0020948;Unigene0022844;Unigene0023428;Unigene0024590;Unigene0026787;Unigene0030313;Unigene00…	K10610+K10841+K10848+K02327+K03504+K02335+K07466+K10740+K02326+K10755+K10846+K10840+K02328+K07466+K04802+K03506+K06634+K10747+K02202+K10755+K10843+K10839+K10609+K10739+K10838+K07466+K10755+K10754+K03505+K03505+K10747+K03143+K10839+K10844+K03141+K10756
Metabolic pathways	626	2427	0.0362045	0.245809	ko01100	Unigene0000056;Unigene0000113;Unigene0000150;Unigene0000169;Unigene0000194;Unigene0000248;Unigene0000252;Unigene0000341;Unigene0000349;Unigene0000422;Unigene0000429;Unigene0000432;Unigene0000451;Unigene0000453;Unigene0000468;Unigene0000471;Unigene0000477;Unigene0000532;Unigene0000672;Unigene0000676;Unigene0000786;Unigene0000828;Unigene0000842;Unigene0000868;Unigene0000890;Unigene0000976;Unigene00…	K21374+K03023+K03006+K00134+K00264+K00648+K01254+K00392+K01051+K12670+K02327+K03504+K01114+K13789+K00026+K08679+K09841+K00763+K09828+K11262+K00912+K00914+K00487+K00281+K00863+K01662+K00975+K01714+K00888+K03637+K01754+K01703+K07432+K08901+K12447+K01188+K01465+K00901+K01490+K05350+K01938+K05280+K00074+K03857+K01803+K04718+K11001+K00591+K02293+K00276+K02335+K01205+K22848+K00963+K05309+K00413+K03849+…
Glucosinolate biosynthesis	5	9	0.0453529	0.28184	ko00966	Unigene0001629;Unigene0008654;Unigene0017966;Unigene0018150;Unigene0036673	K01703+K11820+K11820+K00826+K00826
Mismatch repair	25	74	0.0459417	0.28184	ko03430	Unigene0000429;Unigene0000432;Unigene0002859;Unigene0004486;Unigene0004685;Unigene0005719;Unigene0008199;Unigene0012431;Unigene0012869;Unigene0012911;Unigene0015450;Unigene0018532;Unigene0020838;Unigene0022473;Unigene0024590;Unigene0026572;Unigene0030313;Unigene0030843;Unigene0033937;Unigene0035633;Unigene0035635;Unigene0035904;Unigene0037991;Unigene0040885;Unigene0041964	K02327+K03504+K08739+K07466+K10740+K10858+K10755+K02328+K08737+K07466+K04802+K10747+K10755+K08735+K10739+K08734+K07466+K10755+K10754+K03505+K03505+K10747+K03111+K07456+K10756
mRNA surveillance pathway	48	157	0.0485163	0.28184	ko03015	Unigene0000145;Unigene0000199;Unigene0002225;Unigene0002409;Unigene0003577;Unigene0004288;Unigene0005757;Unigene0006201;Unigene0006513;Unigene0008563;Unigene0009615;Unigene0010668;Unigene0010997;Unigene0011043;Unigene0013442;Unigene0013467;Unigene0018254;Unigene0019128;Unigene0019960;Unigene0020086;Unigene0020100;Unigene0021229;Unigene0021265;Unigene0021897;Unigene0023127;Unigene0023131;Unigene00…	K14376+K14400+K13025+K13917+K14327+K14407+K13114+K14404+K14401+K14962+K14402+K12877+K14411+K03456+K12876+K14411+K14409+K13917+K12812+K11584+K14396+K14399+K11583+K14416+K14397+K06965+K14404+K12875+K06100+K13126+K00565+K03267+K06100+K00565+K12882+K12812+K14396+K11584+K13126+K14324+K13126+K14406+K14962+K14403+K14326+K14411+K03456+K04382
Selenocompound metabolism	9	21	0.0502505	0.28184	ko00450	Unigene0010007;Unigene0012617;Unigene0012755;Unigene0019680;Unigene0023394;Unigene0036106;Unigene0036945;Unigene0038066;Unigene0041239	K01760+K11717+K01874+K01761+K01739+K00384+K13811+K01874+K08247
Phenylalanine, tyrosine and tryptophan biosynthesis	20	58	0.0569894	0.306318	ko00400	Unigene0008854;Unigene0015514;Unigene0016150;Unigene0017613;Unigene0020134;Unigene0023605;Unigene0023676;Unigene0024341;Unigene0024367;Unigene0026341;Unigene0027152;Unigene0027155;Unigene0027694;Unigene0028310;Unigene0028316;Unigene0034491;Unigene0034901;Unigene0036696;Unigene0036883;Unigene0040040	K01817+K15227+K00817+K01695+K00811+K14454+K00800+K05359+K00815+K01696+K01626+K01626+K15227+K14455+K01735+K01626+K01657+K01626+K01658+K00891
Arginine biosynthesis	16	45	0.0646723	0.325536	ko00220	Unigene0003614;Unigene0005970;Unigene0006075;Unigene0010348;Unigene0011540;Unigene0019692;Unigene0020134;Unigene0020446;Unigene0023605;Unigene0028310;Unigene0028514;Unigene0028647;Unigene0032806;Unigene0033839;Unigene0036189;Unigene0040218	K00814+K14272+K00262+K01427+K00145+K01915+K00811+K00818+K14454+K14455+K00930+K13427+K00611+K14682+K01940+K14677
RNA degradation	45	149	0.0656118	0.325536	ko03018	Unigene0000155;Unigene0001220;Unigene0005060;Unigene0005445;Unigene0010839;Unigene0010846;Unigene0011369;Unigene0013626;Unigene0013915;Unigene0014373;Unigene0015342;Unigene0017392;Unigene0020248;Unigene0020759;Unigene0020913;Unigene0022299;Unigene0022497;Unigene0022581;Unigene0022584;Unigene0024624;Unigene0025683;Unigene0027316;Unigene0027684;Unigene0029174;Unigene0030803;Unigene0031835;Unigene00…	K12599+K12604+K12585+K12607+K12619+K12603+K04077+K11600+K12598+K10643+K04077+K12623+K12580+K10643+K00850+K12617+K01148+K12608+K03681+K01689+K13126+K12593+K00962+K12605+K12581+K12603+K12591+K00850+K12587+K12608+K12581+K03678+K12598+K01689+K13126+K13126+K00962+K04077+K12603+K00850+K12600+K12614+K12627+K12616+K01689
Valine, leucine and isoleucine biosynthesis	10	26	0.081496	0.38937	ko00290	Unigene0001587;Unigene0001629;Unigene0003990;Unigene0012428;Unigene0018150;Unigene0022001;Unigene0022572;Unigene0030006;Unigene0034265;Unigene0036673	K01754+K01703+K01704+K01653+K00826+K01649+K00053+K01687+K00052+K00826
Basal transcription factors	20	61	0.0906407	0.410707	ko03022	Unigene0000160;Unigene0000206;Unigene0014125;Unigene0015655;Unigene0017346;Unigene0017608;Unigene0018987;Unigene0019540;Unigene0020081;Unigene0020535;Unigene0020948;Unigene0022212;Unigene0024186;Unigene0030100;Unigene0033039;Unigene0036658;Unigene0037103;Unigene0039026;Unigene0039274;Unigene0041141	K03128+K03132+K03124+K03138+K06634+K03130+K14649+K03137+K03124+K02202+K10843+K03125+K03136+K03135+K03123+K03133+K03143+K03129+K10844+K03141
One carbon pool by folate	11	30	0.0945582	0.410707	ko00670	Unigene0002321;Unigene0004578;Unigene0009999;Unigene0012867;Unigene0015845;Unigene0016472;Unigene0029785;Unigene0033872;Unigene0034715;Unigene0035532;Unigene0035939	K01938+K01433+K00602+K01934+K00600+K00605+K00288+K13998+K00604+K01934+K00297
Glycosylphosphatidylinositol(GPI)-anchor biosynthesis	13	37	0.098137	0.410707	ko00563	Unigene0002529;Unigene0002635;Unigene0007136;Unigene0010970;Unigene0020590;Unigene0027326;Unigene0034882;Unigene0035176;Unigene0036794;Unigene0037432;Unigene0039556;Unigene0040355;Unigene0042017	K03857+K11001+K03861+K05310+K05290+K03859+K05284+K07541+K05286+K03434+K09658+K05292+K05291
Phosphonate and phosphinate metabolism	3	5	0.098697	0.410707	ko00440	Unigene0015807;Unigene0032921;Unigene0033591	K00967+K00993+K00968
Monobactam biosynthesis	5	11	0.107269	0.429465	ko00261	Unigene0001316;Unigene0006724;Unigene0035192;Unigene0036945;Unigene0037691	K01714+K00928+K12524+K13811+K00215
Porphyrin and chlorophyll metabolism	19	59	0.112838	0.429465	ko00860	Unigene0005050;Unigene0005360;Unigene0005581;Unigene0009946;Unigene0011828;Unigene0018294;Unigene0020845;Unigene0022384;Unigene0023963;Unigene0027576;Unigene0028707;Unigene0034540;Unigene0036004;Unigene0036328;Unigene0036852;Unigene0038963;Unigene0040422;Unigene0040469;Unigene0041574	K10960+K08101+K01772+K01749+K03404+K13606+K18010+K01772+K08099+K13545+K01599+K13071+K04035+K00231+K00231+K04040+K01599+K02259+K02492
Carbon metabolism	99	362	0.113192	0.429465	ko01200	Unigene0000169;Unigene0000468;Unigene0000868;Unigene0000890;Unigene0001587;Unigene0002321;Unigene0002530;Unigene0003614;Unigene0003974;Unigene0005122;Unigene0005557;Unigene0005970;Unigene0006374;Unigene0006375;Unigene0006392;Unigene0006933;Unigene0007580;Unigene0007952;Unigene0008241;Unigene0008337;Unigene0008560;Unigene0009650;Unigene0011079;Unigene0011907;Unigene0012030;Unigene0012835;Unigene00…	K00134+K00026+K00281+K00863+K01754+K01938+K01803+K00814+K00161+K00616+K00830+K14272+K01834+K01834+K01679+K00873+K01595+K00131+K00033+K00026+K18121+K00031+K00121+K00627+K00873+K13034+K00036+K00030+K01961+K00600+K00605+K00026+K00844+K02437+K00234+K00051+K00616+K03841+K01962+K00850+K01899+K00873+K01783+K01913+K00029+K01900+K14454+K00640+K00640+K01689+K01962+K00121+K14455+K00927+K00028+K00028+K00162+…
Protein export	20	63	0.119032	0.430502	ko03060	Unigene0002277;Unigene0004518;Unigene0005048;Unigene0006135;Unigene0006237;Unigene0007681;Unigene0015015;Unigene0015718;Unigene0015935;Unigene0020082;Unigene0021242;Unigene0022640;Unigene0025147;Unigene0028828;Unigene0036005;Unigene0036505;Unigene0039303;Unigene0040086;Unigene0040436;Unigene0042022	K12272+K03217+K09647+K09481+K03106+K09647+K03105+K03106+K13431+K10956+K03217+K12275+K03070+K09540+K03070+K03070+K03217+K09648+K03107+K03110
Biosynthesis of secondary metabolites	335	1298	0.124739	0.430502	ko01110	Unigene0000056;Unigene0000169;Unigene0000194;Unigene0000451;Unigene0000453;Unigene0000468;Unigene0000477;Unigene0000672;Unigene0000676;Unigene0000842;Unigene0000868;Unigene0000976;Unigene0001009;Unigene0001316;Unigene0001587;Unigene0001629;Unigene0002065;Unigene0002180;Unigene0002207;Unigene0002282;Unigene0002352;Unigene0002444;Unigene0002530;Unigene0002656;Unigene0002667;Unigene0002757;Unigene00…	K21374+K00134+K00264+K01114+K13789+K00026+K09841+K09828+K11262+K00487+K00281+K01662+K00975+K01714+K01754+K01703+K01188+K00901+K01490+K05350+K05280+K18693+K01803+K00591+K02293+K00276+K03787+K00764+K00705+K00161+K01704+K09699+K21371+K00422+K01904+K01859+K11752+K01081+K15397+K10960+K00616+K01613+K08101+K00830+K01772+K01785+K14272+K01663+K01188+K06126+K22389+K00991+K01834+K01834+K01679+K00928+K00873+…
Alanine, aspartate and glutamate metabolism	21	67	0.124857	0.430502	ko00250	Unigene0000194;Unigene0003614;Unigene0003687;Unigene0005557;Unigene0005970;Unigene0005976;Unigene0006075;Unigene0013071;Unigene0017862;Unigene0019692;Unigene0020134;Unigene0023605;Unigene0025866;Unigene0028310;Unigene0033228;Unigene0035561;Unigene0036189;Unigene0038006;Unigene0038892;Unigene0039966;Unigene0041484	K00264+K00814+K00764+K00830+K14272+K00294+K00262+K01580+K01956+K01915+K00811+K14454+K00609+K14455+K13566+K01939+K01940+K01955+K00820+K00827+K01756
Amino sugar and nucleotide sugar metabolism	41	142	0.133396	0.430502	ko00520	Unigene0000430;Unigene0000471;Unigene0001009;Unigene0002007;Unigene0002944;Unigene0003317;Unigene0003466;Unigene0005316;Unigene0005743;Unigene0007316;Unigene0011415;Unigene0011651;Unigene0013506;Unigene0014851;Unigene0015408;Unigene0017692;Unigene0017881;Unigene0018873;Unigene0019999;Unigene0020357;Unigene0020520;Unigene0021240;Unigene0022934;Unigene0026768;Unigene0029254;Unigene0029409;Unigene00…	K13648+K08679+K00975+K12447+K00963+K00012+K13648+K00963+K01784+K01183+K00975+K13648+K08679+K16190+K00847+K00844+K01183+K13648+K08678+K18677+K00965+K12446+K00966+K15920+K12373+K12448+K06118+K01209+K01835+K00847+K00326+K01183+K00972+K01836+K01711+K05305+K00820+K01810+K13648+K01835+K13648
Nicotinate and nicotinamide metabolism	9	25	0.136517	0.430502	ko00760	Unigene0000532;Unigene0003362;Unigene0004743;Unigene0004840;Unigene0033470;Unigene0036832;Unigene0037175;Unigene0037260;Unigene0038114	K00763+K03787+K18551+K01081+K01950+K00858+K01513+K00767+K18551
Pyrimidine metabolism	48	169	0.138215	0.430502	ko00240	Unigene0000113;Unigene0000150;Unigene0000429;Unigene0000432;Unigene0001524;Unigene0002158;Unigene0002783;Unigene0003362;Unigene0004266;Unigene0004445;Unigene0004840;Unigene0005417;Unigene0009325;Unigene0011851;Unigene0012094;Unigene0012431;Unigene0014179;Unigene0014645;Unigene0014773;Unigene0017302;Unigene0017862;Unigene0017879;Unigene0018789;Unigene0020399;Unigene0023764;Unigene0025866;Unigene00…	K03023+K03006+K02327+K03504+K14641+K01465+K02335+K03787+K01510+K00254+K01081+K02326+K00943+K03010+K03015+K02328+K03025+K13421+K13800+K03506+K01956+K01431+K03016+K10807+K03026+K00609+K00876+K03017+K00962+K03019+K03021+K03012+K13998+K03020+K01464+K16329+K03505+K03505+K10808+K03002+K01513+K01955+K02999+K03013+K03024+K00962+K01510+K03005
Lysine biosynthesis	6	15	0.138278	0.430502	ko00300	Unigene0001316;Unigene0006724;Unigene0022138;Unigene0035192;Unigene0037691;Unigene0039947	K01714+K00928+K10206+K12524+K00215+K01586
Glycolysis / Gluconeogenesis	49	173	0.140163	0.430502	ko00010	Unigene0000169;Unigene0002530;Unigene0003974;Unigene0005783;Unigene0006374;Unigene0006375;Unigene0006933;Unigene0007096;Unigene0007952;Unigene0011079;Unigene0011907;Unigene0012030;Unigene0017169;Unigene0017692;Unigene0018666;Unigene0019575;Unigene0019830;Unigene0020913;Unigene0021779;Unigene0022035;Unigene0022554;Unigene0023951;Unigene0024538;Unigene0024624;Unigene0026805;Unigene0028296;Unigene00…	K00134+K01803+K00161+K01785+K01834+K01834+K00873+K01792+K00131+K00121+K00627+K00873+K00001+K00844+K00128+K00016+K03841+K00850+K03103+K00873+K01913+K01568+K00002+K01689+K01792+K00121+K00927+K00162+K00627+K00850+K00162+K00873+K00873+K01835+K01689+K00128+K01623+K01792+K01895+K00382+K03841+K03841+K00873+K01810+K00850+K00895+K01835+K01568+K01689
Sulfur relay system	5	12	0.148195	0.444584	ko04122	Unigene0001479;Unigene0006594;Unigene0011297;Unigene0015951;Unigene0022213	K03637+K11996+K14168+K01011+K12161
Isoquinoline alkaloid biosynthesis	10	30	0.179905	0.527449	ko00950	Unigene0002757;Unigene0004402;Unigene0014439;Unigene0017834;Unigene0020134;Unigene0023605;Unigene0024367;Unigene0026329;Unigene0028310;Unigene0029331	K00276+K00422+K00422+K00422+K00811+K14454+K00815+K00422+K14455+K00422
Histidine metabolism	10	31	0.210588	0.594399	ko00340	Unigene0005999;Unigene0011670;Unigene0014703;Unigene0016150;Unigene0018666;Unigene0026853;Unigene0027069;Unigene0033123;Unigene0035319;Unigene0038556	K01663+K18649+K11755+K00817+K00128+K01590+K01814+K01693+K00128+K00765
Fatty acid biosynthesis	13	42	0.211956	0.594399	ko00061	Unigene0000248;Unigene0000676;Unigene0010898;Unigene0013507;Unigene0014078;Unigene0020506;Unigene0021367;Unigene0024859;Unigene0026395;Unigene0028105;Unigene0029355;Unigene0030978;Unigene0038323	K00648+K11262+K01897+K10781+K01961+K01962+K03921+K01897+K00645+K01962+K01897+K09458+K00208
Cysteine and methionine metabolism	34	123	0.239193	0.622806	ko00270	Unigene0000468;Unigene0006724;Unigene0008337;Unigene0009173;Unigene0009226;Unigene0009495;Unigene0010007;Unigene0012835;Unigene0014690;Unigene0015951;Unigene0016660;Unigene0017663;Unigene0018150;Unigene0019575;Unigene0019680;Unigene0020134;Unigene0021984;Unigene0023394;Unigene0023605;Unigene0024179;Unigene0024367;Unigene0024391;Unigene0028310;Unigene0034985;Unigene0035192;Unigene0036673;Unigene00…	K00026+K00928+K00026+K21456+K00558+K01244+K01760+K13034+K16054+K01011+K00797+K00026+K00826+K00016+K01761+K00811+K00547+K01739+K14454+K00640+K00815+K00640+K14455+K01919+K12524+K00826+K00789+K00797+K00547+K01738+K00827+K00547+K01251+K00899
Tyrosine metabolism	17	58	0.239816	0.622806	ko00350	Unigene0002757;Unigene0004402;Unigene0011079;Unigene0014439;Unigene0016150;Unigene0017169;Unigene0017834;Unigene0020134;Unigene0020193;Unigene0023605;Unigene0024367;Unigene0026329;Unigene0028296;Unigene0028310;Unigene0029331;Unigene0032177;Unigene0042091	K00276+K00422+K00121+K00422+K00817+K00001+K00422+K00811+K01555+K14454+K00815+K00422+K00121+K14455+K00422+K00451+K07253
RNA polymerase	17	58	0.239816	0.622806	ko03020	Unigene0000113;Unigene0000150;Unigene0011851;Unigene0012094;Unigene0014179;Unigene0018789;Unigene0023764;Unigene0027093;Unigene0028483;Unigene0030077;Unigene0032415;Unigene0034951;Unigene0036634;Unigene0038085;Unigene0038645;Unigene0038779;Unigene0041797	K03023+K03006+K03010+K03015+K03025+K03016+K03026+K03017+K03019+K03021+K03012+K03020+K03002+K02999+K03013+K03024+K03005
Pyruvate metabolism	35	127	0.241398	0.622806	ko00620	Unigene0000468;Unigene0000676;Unigene0003974;Unigene0006392;Unigene0006933;Unigene0007580;Unigene0008337;Unigene0011907;Unigene0012030;Unigene0012287;Unigene0014078;Unigene0017663;Unigene0018666;Unigene0019048;Unigene0019575;Unigene0020436;Unigene0020506;Unigene0022001;Unigene0022035;Unigene0022554;Unigene0022878;Unigene0028105;Unigene0029275;Unigene0029493;Unigene0030812;Unigene0033064;Unigene00…	K00026+K11262+K00161+K01679+K00873+K01595+K00026+K00627+K00873+K00102+K01961+K00026+K00128+K00051+K00016+K18881+K01962+K01649+K00873+K01913+K00029+K01962+K00028+K00028+K00162+K00627+K00162+K00873+K00873+K00128+K01895+K00382+K00873+K01006+K01512
Sulfur metabolism	11	36	0.253126	0.630212	ko00920	Unigene0000341;Unigene0011776;Unigene0012835;Unigene0015951;Unigene0023394;Unigene0024179;Unigene0024391;Unigene0028399;Unigene0030083;Unigene0036945;Unigene0038598	K00392+K00387+K13034+K01011+K01739+K00640+K00640+K05907+K15422+K13811+K01738
Caffeine metabolism	2	4	0.254039	0.630212	ko00232	Unigene0020808;Unigene0034773	K00365+K00106
Fatty acid metabolism	21	75	0.281189	0.684403	ko01212	Unigene0000248;Unigene0000676;Unigene0007217;Unigene0010898;Unigene0011993;Unigene0013507;Unigene0014078;Unigene0014384;Unigene0020506;Unigene0021367;Unigene0022556;Unigene0024859;Unigene0026395;Unigene0028105;Unigene0029355;Unigene0030978;Unigene0034499;Unigene0036660;Unigene0038323;Unigene0038795;Unigene0039477	K00648+K11262+K00232+K01897+K07512+K10781+K01961+K00232+K01962+K03921+K00232+K01897+K00645+K01962+K01897+K09458+K00249+K10527+K00208+K00232+K10251
Propanoate metabolism	17	60	0.290519	0.694019	ko00640	Unigene0000676;Unigene0004237;Unigene0014078;Unigene0019575;Unigene0020506;Unigene0021115;Unigene0023089;Unigene0028105;Unigene0033312;Unigene0033903;Unigene0034377;Unigene0034499;Unigene0034688;Unigene0034689;Unigene0036940;Unigene0037349;Unigene0038449	K11262+K09699+K01961+K00016+K01962+K01899+K01900+K01962+K01578+K05605+K00167+K00249+K00140+K00140+K01895+K00382+K05605
Glycerolipid metabolism	29	107	0.301442	0.706564	ko00561	Unigene0000890;Unigene0002180;Unigene0002444;Unigene0002932;Unigene0005236;Unigene0006746;Unigene0007076;Unigene0010845;Unigene0011016;Unigene0013248;Unigene0017551;Unigene0018666;Unigene0021673;Unigene0023179;Unigene0024538;Unigene0024895;Unigene0028253;Unigene0030143;Unigene0030154;Unigene0031818;Unigene0032165;Unigene0033583;Unigene0033718;Unigene0035319;Unigene0036517;Unigene0037023;Unigene00…	K00863+K00901+K18693+K22848+K01054+K00864+K13508+K01054+K01054+K14674+K13523+K00128+K13519+K06119+K00002+K15728+K00655+K01054+K13513+K06118+K00679+K00630+K09480+K00128+K21362+K07407+K03715+K09480+K15918
Fructose and mannose metabolism	22	80	0.30733	0.706564	ko00051	Unigene0000890;Unigene0002258;Unigene0002530;Unigene0015408;Unigene0017692;Unigene0019648;Unigene0019830;Unigene0020913;Unigene0021366;Unigene0022840;Unigene0022934;Unigene0027748;Unigene0033391;Unigene0034849;Unigene0035501;Unigene0036861;Unigene0037800;Unigene0038090;Unigene0038790;Unigene0038914;Unigene0039842;Unigene0040457	K00863+K19355+K01803+K00847+K00844+K00008+K03841+K00850+K18447+K01805+K00966+K19355+K00850+K00847+K01623+K01103+K03841+K01711+K05305+K03841+K00850+K00895
Carbon fixation in photosynthetic organisms	24	88	0.312202	0.706564	ko00710	Unigene0000169;Unigene0000468;Unigene0002530;Unigene0003614;Unigene0005970;Unigene0007580;Unigene0008337;Unigene0017663;Unigene0019048;Unigene0019830;Unigene0022233;Unigene0022878;Unigene0023605;Unigene0028310;Unigene0028587;Unigene0029275;Unigene0029493;Unigene0035501;Unigene0037800;Unigene0038400;Unigene0038914;Unigene0041116;Unigene0041242;Unigene0041272	K00134+K00026+K01803+K00814+K14272+K01595+K00026+K00026+K00051+K03841+K01783+K00029+K14454+K14455+K00927+K00028+K00028+K01623+K03841+K01807+K03841+K01601+K00615+K01006
Other types of O-glycan biosynthesis	4	12	0.337119	0.749798	ko00514	Unigene0001344;Unigene0013657;Unigene0019729;Unigene0039699	K20784+K09667+K20782+K09667
Pantothenate and CoA biosynthesis	11	39	0.354512	0.76884	ko00770	Unigene0010476;Unigene0012428;Unigene0017879;Unigene0018150;Unigene0022104;Unigene0022572;Unigene0030006;Unigene0035100;Unigene0036673;Unigene0037175;Unigene0039533	K06133+K01653+K01431+K00826+K09680+K00053+K01687+K01464+K00826+K01513+K01918
Glycosphingolipid biosynthesis - ganglio series	2	5	0.3576	0.76884	ko00604	Unigene0029254;Unigene0036933	K12373+K12309
Riboflavin metabolism	6	20	0.364393	0.769101	ko00740	Unigene0004594;Unigene0011086;Unigene0016582;Unigene0021235;Unigene0037175;Unigene0039324	K11752+K00794+K11752+K14379+K01513+K18453
Protein processing in endoplasmic reticulum	72	282	0.369646	0.769101	ko04141	Unigene0000060;Unigene0000138;Unigene0000422;Unigene0000474;Unigene0000508;Unigene0000887;Unigene0001733;Unigene0004370;Unigene0004461;Unigene0005192;Unigene0006135;Unigene0007209;Unigene0007751;Unigene0008156;Unigene0009666;Unigene0011416;Unigene0011720;Unigene0011857;Unigene0011900;Unigene0012138;Unigene0012356;Unigene0013298;Unigene0013352;Unigene0015950;Unigene0016992;Unigene0017083;Unigene00…	K10661+K11718+K12670+K08653+K10597+K09487+K09580+K10636+K13249+K09584+K09481+K13989+K13993+K08057+K13989+K09580+K08288+K03283+K09518+K08288+K14005+K08054+K07151+K09486+K10601+K03283+K13993+K10085+K03283+K03094+K09517+K10575+K10956+K09487+K12275+K10839+K01456+K05546+K08057+K10666+K13993+K13993+K09540+K12667+K09562+K03283+K04523+K10666+K01230+K14006+K09518+K14016+K14016+K14011+K14007+K09503+K14026+…
Carotenoid biosynthesis	9	33	0.422552	0.846965	ko00906	Unigene0000477;Unigene0002667;Unigene0009156;Unigene0009678;Unigene0011941;Unigene0016302;Unigene0027443;Unigene0030148;Unigene0034102	K09841+K02293+K06444+K09835+K09840+K00514+K09837+K09843+K06443
Sphingolipid metabolism	11	41	0.425224	0.846965	ko00600	Unigene0002611;Unigene0005800;Unigene0006721;Unigene0019344;Unigene0026647;Unigene0034693;Unigene0035179;Unigene0036933;Unigene0037023;Unigene0039731;Unigene0040611	K04718+K04712+K04715+K00654+K01190+K04710+K17108+K12309+K07407+K01634+K04708
Phenylalanine metabolism	13	49	0.426766	0.846965	ko00360	Unigene0000842;Unigene0002455;Unigene0002757;Unigene0004405;Unigene0010746;Unigene0011897;Unigene0016150;Unigene0020134;Unigene0023605;Unigene0024367;Unigene0028310;Unigene0039155;Unigene0042091	K00487+K00074+K00276+K01904+K01904+K01904+K00817+K00811+K14454+K00815+K14455+K00588+K07253
Arachidonic acid metabolism	5	18	0.463272	0.892014	ko00590	Unigene0000252;Unigene0002966;Unigene0013248;Unigene0024793;Unigene0035341	K01254+K05309+K14674+K00432+K00079
Glycosaminoglycan degradation	6	22	0.463294	0.892014	ko00531	Unigene0002913;Unigene0004152;Unigene0024183;Unigene0029254;Unigene0036933;Unigene0041450	K01205+K10532+K10532+K12373+K12309+K07964
Other glycan degradation	7	27	0.507327	0.942219	ko00511	Unigene0004009;Unigene0022149;Unigene0026647;Unigene0029254;Unigene0031910;Unigene0035179;Unigene0036933	K01206+K01444+K01190+K12373+K01227+K17108+K12309
Arginine and proline metabolism	18	72	0.509793	0.942219	ko00330	Unigene0005976;Unigene0007998;Unigene0011780;Unigene0014488;Unigene0015816;Unigene0016660;Unigene0018666;Unigene0020134;Unigene0023482;Unigene0023605;Unigene0028310;Unigene0028647;Unigene0033611;Unigene0034687;Unigene0035319;Unigene0035477;Unigene0038137;Unigene0041186	K00294+K00286+K01259+K13366+K17839+K00797+K00128+K00811+K10536+K14454+K14455+K13427+K00472+K00472+K00128+K00472+K00797+K00286
Biotin metabolism	5	19	0.51622	0.942219	ko00780	Unigene0007164;Unigene0022804;Unigene0030978;Unigene0038323;Unigene0042115	K01012+K00652+K09458+K00208+K19562
Glycine, serine and threonine metabolism	23	93	0.52368	0.942219	ko00260	Unigene0000868;Unigene0001587;Unigene0002757;Unigene0005557;Unigene0005970;Unigene0006374;Unigene0006375;Unigene0006724;Unigene0007173;Unigene0015845;Unigene0016472;Unigene0017613;Unigene0018399;Unigene0020338;Unigene0024016;Unigene0026341;Unigene0034131;Unigene0035192;Unigene0037349;Unigene0038476;Unigene0039467;Unigene0039966;Unigene0041307	K00281+K01754+K00276+K00830+K14272+K01834+K01834+K00928+K00130+K00600+K00605+K01695+K02437+K01620+K01733+K01696+K00831+K12524+K00382+K01733+K15919+K00827+K15918
Nitrogen metabolism	9	36	0.538888	0.942219	ko00910	Unigene0000194;Unigene0002901;Unigene0005187;Unigene0006075;Unigene0012639;Unigene0019548;Unigene0019692;Unigene0021272;Unigene0030982	K00264+K01673+K00366+K00262+K00284+K02575+K01915+K01673+K01673
Fatty acid degradation	16	65	0.542841	0.942219	ko00071	Unigene0007217;Unigene0010898;Unigene0011079;Unigene0014384;Unigene0017169;Unigene0018666;Unigene0022556;Unigene0024859;Unigene0028296;Unigene0029355;Unigene0032899;Unigene0034499;Unigene0035319;Unigene0036660;Unigene0038795;Unigene0039939	K00232+K01897+K00121+K00232+K00001+K00128+K00232+K01897+K00121+K01897+K07517+K00249+K00128+K10527+K00232+K07517
Citrate cycle (TCA cycle)	21	86	0.552914	0.942219	ko00020	Unigene0000468;Unigene0003974;Unigene0006392;Unigene0008337;Unigene0009650;Unigene0011907;Unigene0013709;Unigene0016160;Unigene0017663;Unigene0018447;Unigene0021115;Unigene0023089;Unigene0030812;Unigene0031637;Unigene0032286;Unigene0033064;Unigene0033383;Unigene0033489;Unigene0037349;Unigene0038377;Unigene0041500	K00026+K00161+K01679+K00026+K00031+K00627+K00030+K01648+K00026+K00234+K01899+K01900+K00162+K01647+K01647+K00627+K00031+K00162+K00382+K00031+K00658
Autophagy - other eukaryotes	17	70	0.566555	0.942219	ko04136	Unigene0000054;Unigene0000828;Unigene0000902;Unigene0000966;Unigene0001505;Unigene0004592;Unigene0014039;Unigene0015218;Unigene0017667;Unigene0021833;Unigene0023802;Unigene0024320;Unigene0029852;Unigene0030986;Unigene0033310;Unigene0034913;Unigene0041499	K07203+K00914+K17906+K08330+K08269+K08334+K07204+K08331+K17606+K08333+K08266+K17907+K17888+K08341+K17890+K08337+K04382
Brassinosteroid biosynthesis	5	20	0.566829	0.942219	ko00905	Unigene0012080;Unigene0024479;Unigene0031975;Unigene0037550;Unigene0040566	K09587+K09591+K20623+K12637+K09590
Peroxisome	30	124	0.571673	0.942219	ko04146	Unigene0001656;Unigene0001896;Unigene0005557;Unigene0005801;Unigene0007217;Unigene0009650;Unigene0010317;Unigene0010898;Unigene0010961;Unigene0011727;Unigene0011745;Unigene0014384;Unigene0020386;Unigene0022556;Unigene0022786;Unigene0024859;Unigene0026294;Unigene0026542;Unigene0029355;Unigene0030913;Unigene0033312;Unigene0033358;Unigene0033383;Unigene0033933;Unigene0034773;Unigene0035419;Unigene00…	K13341+K12663+K00830+K13348+K00232+K00031+K13337+K01897+K13338+K13347+K12261+K00232+K13348+K00232+K00477+K01897+K13348+K13336+K01897+K13339+K01578+K17879+K00031+K13344+K00106+K13346+K04564+K00031+K00232+K06664
Photosynthesis	15	62	0.574887	0.942219	ko00195	Unigene0001766;Unigene0007506;Unigene0010698;Unigene0014153;Unigene0016893;Unigene0017109;Unigene0028715;Unigene0029473;Unigene0031019;Unigene0031057;Unigene0036438;Unigene0037877;Unigene0038309;Unigene0039234;Unigene0039874	K08901+K02115+K02695+K02111+K02639+K02705+K02639+K02703+K02635+K08906+K02639+K02694+K02109+K08901+K02115
C5-Branched dibasic acid metabolism	4	16	0.578696	0.942219	ko00660	Unigene0001629;Unigene0003990;Unigene0012428;Unigene0034265	K01703+K01704+K01653+K00052
Ubiquinone and other terpenoid-quinone biosynthesis	13	54	0.584678	0.942219	ko00130	Unigene0000842;Unigene0002656;Unigene0004405;Unigene0006097;Unigene0010746;Unigene0011897;Unigene0020370;Unigene0023574;Unigene0024367;Unigene0027384;Unigene0028792;Unigene0032380;Unigene0036211	K00487+K00591+K01904+K06126+K01904+K01904+K03809+K12502+K00815+K06127+K03809+K14760+K05928
Tropane, piperidine and pyridine alkaloid biosynthesis	7	29	0.591626	0.942219	ko00960	Unigene0002757;Unigene0016150;Unigene0020134;Unigene0023605;Unigene0024367;Unigene0028310;Unigene0033166	K00276+K00817+K00811+K14454+K00815+K14455+K08081
beta-Alanine metabolism	17	72	0.618643	0.973231	ko00410	Unigene0002757;Unigene0013071;Unigene0014488;Unigene0015816;Unigene0016660;Unigene0017879;Unigene0018666;Unigene0033312;Unigene0033903;Unigene0034499;Unigene0034688;Unigene0034689;Unigene0035100;Unigene0035319;Unigene0038137;Unigene0038449;Unigene0039533	K00276+K01580+K13366+K17839+K00797+K01431+K00128+K01578+K05605+K00249+K00140+K00140+K01464+K00128+K00797+K05605+K01918
Inositol phosphate metabolism	21	90	0.64609	1	ko00562	Unigene0000451;Unigene0000828;Unigene0001320;Unigene0002530;Unigene0006727;Unigene0011670;Unigene0014786;Unigene0015077;Unigene0018115;Unigene0019712;Unigene0021779;Unigene0022960;Unigene0023652;Unigene0025557;Unigene0030083;Unigene0033665;Unigene0034116;Unigene0034683;Unigene0034688;Unigene0034689;Unigene0036855	K01114+K00914+K00888+K01803+K01092+K18649+K19801+K05857+K00913+K00913+K03103+K01765+K01114+K00889+K15422+K01858+K00921+K00915+K00140+K00140+K10572
Flavone and flavonol biosynthesis	1	4	0.675958	1	ko00944	Unigene0002352	K05280
Butanoate metabolism	6	28	0.718478	1	ko00650	Unigene0002455;Unigene0008560;Unigene0012428;Unigene0013071;Unigene0037699;Unigene0042070	K00074+K18121+K01653+K01580+K01641+K18121
Glycosphingolipid biosynthesis - globo and isoglobo series	2	10	0.74581	1	ko00603	Unigene0029254;Unigene0037023	K12373+K07407
Glyoxylate and dicarboxylate metabolism	24	108	0.748072	1	ko00630	Unigene0000468;Unigene0000868;Unigene0004578;Unigene0005557;Unigene0005970;Unigene0008337;Unigene0008560;Unigene0012639;Unigene0015845;Unigene0016472;Unigene0017663;Unigene0018399;Unigene0019692;Unigene0022554;Unigene0031637;Unigene0032286;Unigene0036047;Unigene0036940;Unigene0037349;Unigene0038549;Unigene0039467;Unigene0041116;Unigene0041307;Unigene0042070	K00026+K00281+K01433+K00830+K14272+K00026+K18121+K00284+K00600+K00605+K00026+K02437+K01915+K01913+K01647+K01647+K19269+K01895+K00382+K19269+K15919+K01601+K15918+K18121
Glycerophospholipid metabolism	27	121	0.749551	1	ko00564	Unigene0000451;Unigene0002180;Unigene0002444;Unigene0005290;Unigene0006107;Unigene0007076;Unigene0011986;Unigene0013248;Unigene0015807;Unigene0016547;Unigene0017551;Unigene0017984;Unigene0021673;Unigene0023652;Unigene0024333;Unigene0024895;Unigene0027591;Unigene0028253;Unigene0029304;Unigene0030154;Unigene0032921;Unigene0033390;Unigene0033583;Unigene0033591;Unigene0036283;Unigene0041412;Unigene00…	K01114+K00901+K18693+K01613+K22389+K13508+K01115+K14674+K00967+K01517+K13523+K05929+K13519+K01114+K08730+K15728+K06130+K00655+K00550+K13513+K00993+K00981+K00630+K00968+K01613+K00981+K00995
Homologous recombination	27	121	0.749551	1	ko03440	Unigene0000429;Unigene0000432;Unigene0000434;Unigene0002783;Unigene0004486;Unigene0004685;Unigene0010885;Unigene0011001;Unigene0012431;Unigene0012911;Unigene0015601;Unigene0016772;Unigene0021883;Unigene0022598;Unigene0024590;Unigene0027552;Unigene0030313;Unigene0033850;Unigene0035633;Unigene0035635;Unigene0037991;Unigene0038360;Unigene0039040;Unigene0039430;Unigene0039831;Unigene0041896;Unigene00…	K02327+K03504+K10901+K02335+K07466+K10740+K10866+K10882+K02328+K07466+K10865+K03165+K10880+K10875+K10739+K10881+K07466+K10728+K03505+K03505+K03111+K10875+K10867+K11864+K03165+K10869+K20776
Indole alkaloid biosynthesis	1	5	0.755547	1	ko00901	Unigene0016556	K21026
Ubiquitin mediated proteolysis	39	174	0.772087	1	ko04120	Unigene0000040;Unigene0000508;Unigene0000895;Unigene0005002;Unigene0007645;Unigene0008286;Unigene0008461;Unigene0008835;Unigene0009967;Unigene0011349;Unigene0011547;Unigene0011916;Unigene0014942;Unigene0015314;Unigene0016992;Unigene0018293;Unigene0019424;Unigene0019469;Unigene0020441;Unigene0020720;Unigene0022722;Unigene0023428;Unigene0026058;Unigene0026590;Unigene0028093;Unigene0032264;Unigene00…	K10610+K10597+K10590+K03350+K03354+K03363+K04506+K10580+K03364+K10686+K10144+K03353+K10598+K10573+K10601+K03094+K10575+K10604+K03351+K06688+K10685+K10609+K10589+K10581+K04506+K10588+K03357+K10604+K04506+K03355+K10143+K03354+K03094+K03094+K20217+K10144+K03349+K10599+K06689
Photosynthesis - antenna proteins	4	21	0.795683	1	ko00196	Unigene0003622;Unigene0009231;Unigene0026256;Unigene0039753	K08908+K14172+K08908+K08912
Synthesis and degradation of ketone bodies	1	6	0.815598	1	ko00072	Unigene0037699	K01641
Lipoic acid metabolism	1	6	0.815598	1	ko00785	Unigene0034358	K03644
SNARE interactions in vesicular transport	9	46	0.830988	1	ko04130	Unigene0002802;Unigene0004005;Unigene0018329;Unigene0021387;Unigene0033033;Unigene0034011;Unigene0034242;Unigene0034448;Unigene0038893	K08517+K08490+K08515+K08515+K08490+K08503+K08495+K08488+K08486
DNA replication	24	114	0.837517	1	ko03030	Unigene0000429;Unigene0000432;Unigene0002783;Unigene0004486;Unigene0004685;Unigene0005417;Unigene0008199;Unigene0012431;Unigene0012911;Unigene0015450;Unigene0017302;Unigene0018532;Unigene0020838;Unigene0023649;Unigene0023987;Unigene0024590;Unigene0030313;Unigene0030843;Unigene0033937;Unigene0035633;Unigene0035635;Unigene0035904;Unigene0037991;Unigene0041964	K02327+K03504+K02335+K07466+K10740+K02326+K10755+K02328+K07466+K04802+K03506+K10747+K10755+K10743+K04799+K10739+K07466+K10755+K10754+K03505+K03505+K10747+K03111+K10756
Valine, leucine and isoleucine degradation	17	83	0.840076	1	ko00280	Unigene0004237;Unigene0018150;Unigene0018666;Unigene0021648;Unigene0024282;Unigene0033903;Unigene0034377;Unigene0034499;Unigene0034688;Unigene0034689;Unigene0035319;Unigene0036673;Unigene0037349;Unigene0037699;Unigene0037788;Unigene0038449;Unigene0039966	K09699+K00826+K00128+K01969+K05607+K05605+K00167+K00249+K00140+K00140+K00128+K00826+K00382+K01641+K01968+K05605+K00827
Ascorbate and aldarate metabolism	11	57	0.861091	1	ko00053	Unigene0002007;Unigene0003317;Unigene0011670;Unigene0012681;Unigene0013858;Unigene0014851;Unigene0015837;Unigene0018666;Unigene0019221;Unigene0034757;Unigene0035319	K12447+K00012+K18649+K00434+K14190+K16190+K00225+K00128+K08232+K08232+K00128
Circadian rhythm - plant	11	57	0.861091	1	ko04712	Unigene0000271;Unigene0000997;Unigene0001759;Unigene0002066;Unigene0008131;Unigene0021310;Unigene0023749;Unigene0026544;Unigene0035286;Unigene0036150;Unigene0041256	K12115+K12129+K16240+K12127+K16221+K12130+K12124+K12119+K12118+K10143+K03097
Lysine degradation	15	76	0.868865	1	ko00310	Unigene0000423;Unigene0000660;Unigene0002332;Unigene0008267;Unigene0010164;Unigene0010611;Unigene0017361;Unigene0018666;Unigene0022258;Unigene0031269;Unigene0034039;Unigene0035319;Unigene0035636;Unigene0037740;Unigene0041500	K11423+K22748+K11430+K19199+K11430+K11420+K19199+K00128+K11423+K11423+K14157+K00128+K18826+K11423+K00658
Starch and sucrose metabolism	35	166	0.874301	1	ko00500	Unigene0001009;Unigene0002065;Unigene0002282;Unigene0002944;Unigene0003906;Unigene0004506;Unigene0005316;Unigene0006022;Unigene0011415;Unigene0011679;Unigene0014893;Unigene0015039;Unigene0015408;Unigene0016488;Unigene0017692;Unigene0019063;Unigene0019916;Unigene0020404;Unigene0021366;Unigene0027879;Unigene0031549;Unigene0031858;Unigene0033069;Unigene0034588;Unigene0034849;Unigene0034928;Unigene00…	K00975+K01188+K05350+K00963+K00705+K01176+K00963+K01188+K00975+K13679+K05349+K01188+K00847+K01187+K00844+K00688+K01194+K05349+K18447+K00703+K19893+K01193+K00703+K01835+K00847+K05349+K00700+K00700+K01513+K01214+K00705+K00700+K01810+K01835+K01214
Flavonoid biosynthesis	10	54	0.886231	1	ko00941	Unigene0000842;Unigene0002352;Unigene0004485;Unigene0018677;Unigene0027530;Unigene0028314;Unigene0030127;Unigene0034599;Unigene0038837;Unigene0039155	K00487+K05280+K01859+K08695+K13065+K13082+K05278+K13065+K00475+K00588
Ether lipid metabolism	6	35	0.892309	1	ko00565	Unigene0000451;Unigene0011986;Unigene0013248;Unigene0021673;Unigene0023652;Unigene0032921	K01114+K01115+K14674+K13519+K01114+K00993
Stilbenoid, diarylheptanoid and gingerol biosynthesis	4	25	0.895396	1	ko00945	Unigene0000842;Unigene0027530;Unigene0034599;Unigene0039155	K00487+K13065+K13065+K00588
Biosynthesis of unsaturated fatty acids	6	36	0.907487	1	ko01040	Unigene0007217;Unigene0014384;Unigene0021367;Unigene0022556;Unigene0038795;Unigene0039477	K00232+K00232+K03921+K00232+K00232+K10251
Phosphatidylinositol signaling system	19	98	0.908415	1	ko04070	Unigene0000828;Unigene0000906;Unigene0001320;Unigene0002180;Unigene0006727;Unigene0007888;Unigene0011670;Unigene0014786;Unigene0015077;Unigene0017067;Unigene0018115;Unigene0019712;Unigene0025557;Unigene0030083;Unigene0033390;Unigene0034116;Unigene0034683;Unigene0036855;Unigene0041412	K00914+K13024+K00888+K00901+K01092+K02183+K18649+K19801+K05857+K02183+K00913+K00913+K00889+K15422+K00981+K00921+K00915+K10572+K00981
alpha-Linolenic acid metabolism	10	56	0.911329	1	ko00592	Unigene0006107;Unigene0007217;Unigene0007358;Unigene0013248;Unigene0014384;Unigene0021695;Unigene0022556;Unigene0032990;Unigene0036660;Unigene0038795	K22389+K00232+K10528+K14674+K00232+K10526+K00232+K00454+K10527+K00232
Endocytosis	49	237	0.93385	1	ko04144	Unigene0000514;Unigene0002028;Unigene0003029;Unigene0003434;Unigene0005378;Unigene0006740;Unigene0008056;Unigene0010958;Unigene0011857;Unigene0011986;Unigene0012123;Unigene0012553;Unigene0014333;Unigene0014407;Unigene0015293;Unigene0015956;Unigene0016209;Unigene0016232;Unigene0016287;Unigene0017083;Unigene0018092;Unigene0018418;Unigene0018772;Unigene0020834;Unigene0021073;Unigene0022089;Unigene00…	K01528+K11866+K19366+K12189+K19476+K12197+K07937+K18466+K03283+K01115+K12190+K07904+K12486+K05755+K07904+K07904+K12486+K12486+K12195+K03283+K03283+K19476+K12471+K11827+K12193+K12471+K12489+K12479+K15053+K07904+K12198+K00889+K19366+K05756+K12196+K11824+K03283+K10364+K19476+K10396+K11826+K05758+K12185+K12489+K12191+K12200+K07904+K10365+K05757
Oxidative phosphorylation	37	184	0.936578	1	ko00190	Unigene0003076;Unigene0005066;Unigene0007506;Unigene0013501;Unigene0013645;Unigene0013830;Unigene0014153;Unigene0015332;Unigene0017400;Unigene0018036;Unigene0018447;Unigene0020896;Unigene0021042;Unigene0021863;Unigene0024361;Unigene0024943;Unigene0025223;Unigene0026200;Unigene0027083;Unigene0027249;Unigene0030807;Unigene0031517;Unigene0033110;Unigene0033350;Unigene0033873;Unigene0034066;Unigene00…	K00413+K02151+K02115+K05582+K02256+K03879+K02111+K02148+K02146+K02144+K00234+K03940+K03942+K02147+K02138+K00416+K02266+K03955+K02258+K02132+K03939+K03934+K02152+K00411+K03955+K03949+K02135+K00411+K02149+K02109+K03941+K01507+K02145+K02115+K02259+K03946+K03953
Pentose and glucuronate interconversions	15	83	0.938333	1	ko00040	Unigene0000349;Unigene0002007;Unigene0002944;Unigene0003317;Unigene0005316;Unigene0005718;Unigene0007178;Unigene0007475;Unigene0010238;Unigene0014851;Unigene0019648;Unigene0022233;Unigene0022840;Unigene0024538;Unigene0032028	K01051+K12447+K00963+K00012+K00963+K01051+K01728+K01051+K01213+K16190+K00008+K01783+K01805+K00002+K01051
Steroid biosynthesis	8	49	0.940032	1	ko00100	Unigene0000672;Unigene0010296;Unigene0013248;Unigene0018159;Unigene0024178;Unigene0033356;Unigene0037133;Unigene0037718	K09828+K01824+K14674+K08246+K00222+K00227+K00801+K07748
Monoterpenoid biosynthesis	1	10	0.940321	1	ko00902	Unigene0009412	K15095
Zeatin biosynthesis	2	17	0.945835	1	ko00908	Unigene0007818;Unigene0040822	K10760+K00791
Taurine and hypotaurine metabolism	1	11	0.954993	1	ko00430	Unigene0013071	K01580
Cyanoamino acid metabolism	9	57	0.960875	1	ko00460	Unigene0002065;Unigene0002282;Unigene0006022;Unigene0012835;Unigene0014893;Unigene0015039;Unigene0015845;Unigene0020404;Unigene0034928	K01188+K05350+K01188+K13034+K05349+K01188+K00600+K05349+K05349
Fatty acid elongation	5	36	0.961503	1	ko00062	Unigene0004860;Unigene0011179;Unigene0011993;Unigene0025981;Unigene0039477	K15397+K01076+K07512+K15397+K10251
Sesquiterpenoid and triterpenoid biosynthesis	2	19	0.966137	1	ko00909	Unigene0030161;Unigene0037133	K15891+K00801
Glutathione metabolism	21	122	0.980815	1	ko00480	Unigene0005932;Unigene0007254;Unigene0008241;Unigene0009173;Unigene0009650;Unigene0012681;Unigene0013147;Unigene0013312;Unigene0016660;Unigene0018077;Unigene0018330;Unigene0020399;Unigene0021358;Unigene0024793;Unigene0032791;Unigene0033383;Unigene0034985;Unigene0036437;Unigene0038137;Unigene0038377;Unigene0039436	K00799+K00799+K00033+K21456+K00031+K00434+K00799+K00036+K00797+K01469+K01255+K10807+K01256+K00432+K00036+K00031+K01919+K10808+K00797+K00031+K00033
Diterpenoid biosynthesis	3	28	0.981352	1	ko00904	Unigene0015010;Unigene0017003;Unigene0029324	K17961+K04122+K04123
Cutin, suberine and wax biosynthesis	1	15	0.985449	1	ko00073	Unigene0015865	K17991
Phagosome	19	116	0.987915	1	ko04145	Unigene0000828;Unigene0001241;Unigene0002802;Unigene0005066;Unigene0006135;Unigene0008156;Unigene0013298;Unigene0015332;Unigene0017400;Unigene0018036;Unigene0020082;Unigene0021863;Unigene0025775;Unigene0033110;Unigene0034116;Unigene0034448;Unigene0036978;Unigene0038586;Unigene0039654	K00914+K07374+K08517+K02151+K09481+K08057+K08054+K02148+K02146+K02144+K10956+K02147+K08057+K02152+K00921+K08488+K02149+K07375+K02145
ABC transporters	6	50	0.991681	1	ko02010	Unigene0000265;Unigene0007374;Unigene0035936;Unigene0038306;Unigene0038624;Unigene0041570	K05658+K05655+K05674+K05663+K05643+K05656
Tryptophan metabolism	6	51	0.993109	1	ko00380	Unigene0008654;Unigene0017966;Unigene0018666;Unigene0023891;Unigene0031165;Unigene0035319	K11820+K11820+K00128+K22450+K22450+K00128
Phenylpropanoid biosynthesis	21	131	0.993615	1	ko00940	Unigene0000842;Unigene0002065;Unigene0002282;Unigene0004405;Unigene0006022;Unigene0008212;Unigene0010746;Unigene0011897;Unigene0012278;Unigene0014893;Unigene0015039;Unigene0020404;Unigene0027530;Unigene0027650;Unigene0028309;Unigene0034599;Unigene0034928;Unigene0037722;Unigene0038284;Unigene0039155;Unigene0040618	K00487+K01188+K05350+K01904+K01188+K00430+K01904+K01904+K22395+K05349+K01188+K05349+K13065+K18368+K00083+K13065+K05349+K00430+K12356+K00588+K00430
Plant hormone signal transduction	45	251	0.995835	1	ko04075	Unigene0000051;Unigene0000838;Unigene0001992;Unigene0002189;Unigene0002353;Unigene0003023;Unigene0005005;Unigene0010952;Unigene0010953;Unigene0012439;Unigene0012999;Unigene0015448;Unigene0016106;Unigene0016675;Unigene0017638;Unigene0018005;Unigene0018378;Unigene0018411;Unigene0019547;Unigene0019723;Unigene0021390;Unigene0021790;Unigene0021791;Unigene0023546;Unigene0024506;Unigene0027495;Unigene00…	K14489+K14514+K14488+K14508+K14487+K14488+K13422+K14484+K13464+K14514+K14491+K14497+K14484+K14432+K14488+K13449+K14432+K14496+K13464+K14488+K14491+K14488+K14488+K14484+K14493+K14498+K14510+K14491+K14432+K13415+K14486+K13946+K14431+K14506+K14516+K13464+K14503+K13464+K14486+K14509+K14494+K14488+K14486+K14485+K14431
Plant-pathogen interaction	68	367	0.998131	1	ko04626	Unigene0000038;Unigene0000103;Unigene0000236;Unigene0000459;Unigene0000887;Unigene0001098;Unigene0001938;Unigene0001953;Unigene0003438;Unigene0003668;Unigene0004016;Unigene0004221;Unigene0004267;Unigene0004860;Unigene0005620;Unigene0005826;Unigene0006239;Unigene0006746;Unigene0007496;Unigene0007866;Unigene0007888;Unigene0009203;Unigene0011825;Unigene0011955;Unigene0012564;Unigene0014728;Unigene00…	K09422+K02358+K13412+K09422+K09487+K13420+K09422+K13448+K13448+K05391+K13457+K09422+K13448+K15397+K13412+K13412+K09422+K00864+K09422+K09422+K02183+K20536+K13448+K09422+K09422+K13457+K13459+K09422+K13412+K02183+K13459+K13449+K13412+K05391+K09487+K13412+K09422+K13424+K02358+K13448+K15397+K13436+K09422+K13427+K09422+K13448+K13448+K13448+K13448+K12795+K09422+K13448+K09422+K09422+K13414+K09422+K05391+…
Linoleic acid metabolism	2	32	0.998637	1	ko00591	Unigene0013248;Unigene0032990	K14674+K00454
MAPK signaling pathway - plant	31	206	0.999738	1	ko04016	Unigene0000739;Unigene0000838;Unigene0001098;Unigene0002467;Unigene0005005;Unigene0006188;Unigene0007650;Unigene0007888;Unigene0008943;Unigene0009203;Unigene0010048;Unigene0012439;Unigene0013676;Unigene0015448;Unigene0017067;Unigene0018005;Unigene0018411;Unigene0022866;Unigene0024029;Unigene0027495;Unigene0027943;Unigene0035512;Unigene0036204;Unigene0037333;Unigene0038057;Unigene0038708;Unigene00…	K20717+K14514+K13420+K20725+K13422+K20538+K20725+K02183+K20718+K20536+K20714+K14514+K17686+K14497+K02183+K13449+K14496+K20726+K13424+K14498+K14510+K14516+K13414+K13414+K14509+K20726+K20538+K17686+K20553+K20717+K20606
Ribosome	58	460	1	1	ko03010	Unigene0001843;Unigene0002077;Unigene0002613;Unigene0002886;Unigene0006329;Unigene0006431;Unigene0006644;Unigene0007858;Unigene0008114;Unigene0008488;Unigene0009390;Unigene0011981;Unigene0012074;Unigene0014525;Unigene0016134;Unigene0017467;Unigene0017597;Unigene0017971;Unigene0020544;Unigene0022078;Unigene0022876;Unigene0023186;Unigene0023777;Unigene0023804;Unigene0024097;Unigene0025556;Unigene00…	K02923+K02941+K02903+K02948+K02925+K02935+K02887+K02908+K02904+K02975+K02881+K02995+K02881+K02981+K02950+K02937+K02949+K02863+K02936+K02935+K02902+K02934+K02940+K02897+K02868+K02896+K02939+K02883+K02892+K02896+K02921+K02942+K02881+K02899+K02935+K02922+K02990+K02974+K02906+K02976+K02935+K02867+K02952+K02906+K02946+K02872+K02882+K02988+K02864+K02910+K02871+K02930+K02930+K02911+K02984+K02989+K02987+…

## Sheet: GP
KEGG analysis result for single-copy genes in Chaenomeles sinensis(GP)
Pathway	out (1525)	All (6388)	Pvalue	Qvalue	Pathway ID	Genes	K_IDs
Non-homologous end-joining	8	8	1.0403e-05	0.00134198	ko03450	Unigene0005918;Unigene0009065;Unigene0009985;Unigene0016626;Unigene0021673;Unigene0035227;Unigene0038260;Unigene0039542	K04799+K10885+K03512+K10865+K10777+K10886+K10866+K10884
Spliceosome	89	263	0.000122053	0.00787243	ko03040	Unigene0000067;Unigene0000167;Unigene0000222;Unigene0000296;Unigene0000382;Unigene0000581;Unigene0000661;Unigene0001453;Unigene0001494;Unigene0001508;Unigene0002499;Unigene0003097;Unigene0004159;Unigene0006343;Unigene0008673;Unigene0009232;Unigene0009963;Unigene0010041;Unigene0011099;Unigene0012420;Unigene0012496;Unigene0013639;Unigene0013811;Unigene0013907;Unigene0014592;Unigene0016086;Unigene00…	K12823+K12823+K12820+K12844+K12856+K11984+K12860+K12896+K12867+K12839+K12843+K12890+K12817+K03283+K12835+K12831+K12893+K11087+K03283+K12878+K12821+K12893+K03283+K12837+K12662+K12823+K12850+K06063+K12818+K12858+K12880+K12830+K12819+K12863+K12875+K12855+K12876+K13025+K12825+K12741+K12857+K12741+K12882+K12828+K12623+K12741+K12836+K12869+K12897+K11092+K11088+K12812+K12837+K11097+K09564+K03283+K12821+…
Biosynthesis of amino acids	96	296	0.00038242	0.0157937	ko01230	Unigene0000092;Unigene0000116;Unigene0000536;Unigene0001722;Unigene0001842;Unigene0002710;Unigene0003149;Unigene0003978;Unigene0004644;Unigene0004878;Unigene0004967;Unigene0005826;Unigene0007173;Unigene0007636;Unigene0008058;Unigene0009192;Unigene0010659;Unigene0011085;Unigene0011723;Unigene0011891;Unigene0012650;Unigene0012712;Unigene0012854;Unigene0012939;Unigene0013024;Unigene0014267;Unigene00…	K00264+K01754+K14682+K01687+K00789+K00031+K01626+K15227+K01834+K01733+K01695+K01760+K01783+K01714+K00948+K01738+K01626+K00873+K01586+K01658+K13034+K01626+K01620+K00052+K01693+K01834+K00765+K00850+K01817+K00640+K14455+K00615+K14677+K01689+K00873+K15227+K01940+K00616+K00826+K00611+K01623+K00215+K00873+K00927+K01689+K00640+K00600+K10206+K01649+K01735+K01657+K00030+K00818+K01689+K01696+K01704+K00815+…
Base excision repair	24	53	0.000489726	0.0157937	ko03410	Unigene0000299;Unigene0001473;Unigene0002361;Unigene0002944;Unigene0005918;Unigene0006327;Unigene0008166;Unigene0009862;Unigene0009985;Unigene0013520;Unigene0014617;Unigene0016523;Unigene0016647;Unigene0017887;Unigene0020677;Unigene0023381;Unigene0029484;Unigene0031023;Unigene0035211;Unigene0035212;Unigene0035518;Unigene0038680;Unigene0039886;Unigene0041286	K02327+K01246+K10747+K10773+K04799+K01247+K02335+K03660+K03512+K03504+K03575+K01247+K10803+K01246+K10747+K03648+K02326+K03506+K03505+K03505+K04802+K01142+K02328+K10801
RNA transport	78	240	0.00123333	0.0268642	ko03013	Unigene0000055;Unigene0000306;Unigene0000549;Unigene0001033;Unigene0003021;Unigene0003264;Unigene0003902;Unigene0004167;Unigene0004927;Unigene0005188;Unigene0005946;Unigene0006359;Unigene0006482;Unigene0006684;Unigene0008603;Unigene0008843;Unigene0008925;Unigene0009395;Unigene0012399;Unigene0012420;Unigene0013013;Unigene0014688;Unigene0014897;Unigene0018194;Unigene0018965;Unigene0019014;Unigene00…	K09291+K14326+K14292+K14301+K14327+K03680+K14324+K13130+K14321+K03254+K03240+K13126+K14312+K03242+K14300+K05749+K03243+K14293+K14314+K12878+K03250+K07562+K13114+K03539+K14305+K12880+K03253+K00784+K03246+K12875+K14290+K12876+K03260+K13025+K14310+K03236+K13151+K03113+K03241+K03247+K12882+K03260+K14004+K03248+K03537+K12812+K07936+K12812+K03260+K13126+K03754+K14298+K03252+K14317+K14319+K12877+K14303+…
Pentose phosphate pathway	25	59	0.0012495	0.0268642	ko00030	Unigene0000284;Unigene0002042;Unigene0007173;Unigene0008058;Unigene0010482;Unigene0012525;Unigene0013993;Unigene0014683;Unigene0015858;Unigene0016384;Unigene0018577;Unigene0020463;Unigene0022679;Unigene0022868;Unigene0026039;Unigene0026688;Unigene0027317;Unigene0030755;Unigene0032952;Unigene0033239;Unigene0033888;Unigene0034397;Unigene0036968;Unigene0038316;Unigene0040547	K00895+K01835+K01783+K00948+K01810+K01057+K00131+K00850+K03841+K00615+K00033+K00616+K01623+K03841+K00033+K00036+K03841+K01835+K01807+K00850+K00850+K00616+K00852+K01057+K00036
Aminoacyl-tRNA biosynthesis	31	80	0.00203303	0.0374658	ko00970	Unigene0000226;Unigene0000525;Unigene0000613;Unigene0002384;Unigene0002963;Unigene0003096;Unigene0003596;Unigene0004141;Unigene0004781;Unigene0011279;Unigene0012795;Unigene0014088;Unigene0018266;Unigene0019693;Unigene0019812;Unigene0021152;Unigene0032303;Unigene0032887;Unigene0032903;Unigene0033360;Unigene0033418;Unigene0034304;Unigene0034956;Unigene0036378;Unigene0036385;Unigene0037196;Unigene00…	K01869+K01873+K01873+K01874+K00604+K01866+K01889+K01868+K01893+K01874+K01869+K14164+K01883+K01890+K01872+K01886+K01889+K01880+K01868+K01883+K01875+K04567+K01876+K01867+K01872+K02434+K01887+K01893+K01875+K01870+K01881
Galactose metabolism	23	55	0.00237814	0.0383475	ko00052	Unigene0002042;Unigene0003362;Unigene0008033;Unigene0008936;Unigene0010185;Unigene0012512;Unigene0013127;Unigene0014683;Unigene0014805;Unigene0016423;Unigene0016882;Unigene0017490;Unigene0017946;Unigene0020344;Unigene0020977;Unigene0027359;Unigene0030755;Unigene0031185;Unigene0033239;Unigene0033698;Unigene0033888;Unigene0036329;Unigene0036876	K01835+K06617+K00965+K07407+K01784+K06617+K00963+K00850+K18819+K06617+K06617+K12447+K00963+K00844+K18819+K01193+K01835+K01785+K00850+K01187+K00850+K12309+K01190
Nucleotide excision repair	35	95	0.00296879	0.0425526	ko03420	Unigene0000299;Unigene0001924;Unigene0002229;Unigene0002361;Unigene0004105;Unigene0006935;Unigene0008166;Unigene0012668;Unigene0013520;Unigene0015464;Unigene0016610;Unigene0019727;Unigene0020677;Unigene0021719;Unigene0022807;Unigene0026268;Unigene0027497;Unigene0029484;Unigene0030127;Unigene0030169;Unigene0031023;Unigene0031426;Unigene0032682;Unigene0033283;Unigene0035211;Unigene0035212;Unigene00…	K02327+K10841+K10844+K10747+K02202+K10848+K02335+K10754+K03504+K07466+K07466+K03143+K10747+K10838+K10756+K10610+K10755+K02326+K07466+K10843+K03506+K10739+K10846+K03141+K03505+K03505+K06634+K04802+K10839+K10609+K10740+K02328+K10839+K10755+K10755
Purine metabolism	74	234	0.00363031	0.046831	ko00230	Unigene0000299;Unigene0000642;Unigene0001673;Unigene0001755;Unigene0002042;Unigene0002287;Unigene0002418;Unigene0002522;Unigene0002809;Unigene0003009;Unigene0003122;Unigene0003352;Unigene0004132;Unigene0004244;Unigene0004300;Unigene0004458;Unigene0005512;Unigene0006043;Unigene0007997;Unigene0008058;Unigene0008166;Unigene0008585;Unigene0010687;Unigene0011085;Unigene0011867;Unigene0012144;Unigene00…	K02327+K03006+K01510+K03023+K01835+K13811+K00602+K01081+K00939+K03002+K01952+K01513+K03012+K00939+K18447+K00951+K03017+K02999+K03019+K00948+K02335+K00962+K00962+K00873+K10807+K01510+K01514+K03015+K03020+K00951+K03504+K03021+K03013+K00873+K01490+K00873+K01427+K10808+K06928+K01519+K00365+K03024+K01517+K18453+K03010+K02326+K01835+K03506+K00873+K01939+K01756+K00764+K00873+K01490+K00873+K03505+K03505+…
Glycolysis / Gluconeogenesis	49	146	0.00470463	0.0551725	ko00010	Unigene0000284;Unigene0002042;Unigene0002643;Unigene0003644;Unigene0004262;Unigene0004644;Unigene0010482;Unigene0011085;Unigene0012131;Unigene0013993;Unigene0014267;Unigene0014654;Unigene0014683;Unigene0015858;Unigene0016724;Unigene0016729;Unigene0018822;Unigene0019055;Unigene0020344;Unigene0021618;Unigene0022679;Unigene0022822;Unigene0022868;Unigene0023973;Unigene0024117;Unigene0027317;Unigene00…	K00895+K01835+K00382+K00121+K01792+K01834+K01810+K00873+K01568+K00131+K01834+K01895+K00850+K03841+K01689+K00873+K00128+K00121+K00844+K01792+K01623+K00873+K03841+K00927+K01689+K03841+K00016+K00001+K01835+K01785+K01689+K00162+K00873+K01803+K00134+K00850+K00627+K00873+K00850+K00002+K00161+K00873+K00627+K01792+K01913+K01568+K00128+K00162+K03103
Phenylalanine, tyrosine and tryptophan biosynthesis	20	49	0.00619499	0.0629018	ko00400	Unigene0003149;Unigene0003978;Unigene0004967;Unigene0010659;Unigene0011891;Unigene0012712;Unigene0014714;Unigene0016057;Unigene0017534;Unigene0027827;Unigene0028072;Unigene0032105;Unigene0032285;Unigene0032551;Unigene0033385;Unigene0033536;Unigene0033659;Unigene0034724;Unigene0035608;Unigene0040968	K01626+K15227+K01695+K01626+K01658+K01626+K01817+K14455+K15227+K01735+K01657+K01696+K00815+K14454+K01626+K00891+K00800+K00817+K05359+K00811
N-Glycan biosynthesis	24	62	0.00633894	0.0629018	ko00510	Unigene0000003;Unigene0000566;Unigene0000646;Unigene0004398;Unigene0009606;Unigene0009808;Unigene0010016;Unigene0014189;Unigene0014462;Unigene0015116;Unigene0021596;Unigene0026629;Unigene0027503;Unigene0032353;Unigene0032637;Unigene0033874;Unigene0037455;Unigene0037743;Unigene0038820;Unigene0039157;Unigene0040238;Unigene0042038;Unigene0042371;Unigene0042681	K00737+K01231+K01228+K03849+K01230+K03847+K00721+K07151+K00726+K12666+K12670+K05546+K12667+K00737+K09658+K00902+K00729+K03850+K03842+K03843+K00737+K03846+K07432+K03849
Amino sugar and nucleotide sugar metabolism	42	124	0.00709928	0.0640439	ko00520	Unigene0001883;Unigene0001959;Unigene0002042;Unigene0002264;Unigene0002353;Unigene0002452;Unigene0002524;Unigene0002777;Unigene0004486;Unigene0004487;Unigene0008033;Unigene0008524;Unigene0008838;Unigene0010185;Unigene0010482;Unigene0011098;Unigene0013127;Unigene0015272;Unigene0015412;Unigene0017490;Unigene0017946;Unigene0019643;Unigene0020344;Unigene0021457;Unigene0021546;Unigene0022393;Unigene00…	K13648+K00326+K01835+K01836+K15920+K00820+K05305+K12446+K13648+K13648+K00965+K18677+K08679+K01784+K01810+K00326+K00963+K01209+K00847+K12447+K00963+K01183+K00844+K00847+K00975+K01183+K12373+K13648+K06118+K01835+K08679+K12448+K13648+K00966+K08678+K00972+K00975+K13648+K16190+K01183+K00012+K01711
Carbon metabolism	98	330	0.00744697	0.0640439	ko01200	Unigene0000116;Unigene0000453;Unigene0001149;Unigene0001716;Unigene0002643;Unigene0002710;Unigene0003644;Unigene0004644;Unigene0005947;Unigene0007173;Unigene0007581;Unigene0008058;Unigene0008276;Unigene0009192;Unigene0009356;Unigene0009524;Unigene0010482;Unigene0011019;Unigene0011085;Unigene0011489;Unigene0012525;Unigene0012650;Unigene0012981;Unigene0013993;Unigene0014267;Unigene0014476;Unigene00…	K01754+K00029+K00028+K18121+K00382+K00031+K00121+K01834+K01962+K01783+K00140+K00948+K00234+K01738+K00297+K18121+K01810+K02437+K00873+K00281+K01057+K13034+K00026+K00131+K01834+K05605+K01895+K00850+K00640+K03841+K14455+K00615+K01689+K00873+K00028+K01938+K19269+K01900+K00033+K01961+K00121+K00026+K00844+K00616+K00863+K01623+K00873+K03841+K00927+K01689+K00605+K00640+K00830+K00600+K01679+K00033+K00036+…
Vitamin B6 metabolism	9	17	0.00896096	0.0701815	ko00750	Unigene0003928;Unigene0004878;Unigene0019913;Unigene0030690;Unigene0031731;Unigene0033829;Unigene0034609;Unigene0036262;Unigene0041211	K00275+K01733+K05275+K08681+K00275+K06215+K00868+K00831+K01733
Arginine biosynthesis	16	38	0.00975205	0.0701815	ko00220	Unigene0000536;Unigene0003790;Unigene0016057;Unigene0016590;Unigene0017767;Unigene0022579;Unigene0023797;Unigene0031909;Unigene0032551;Unigene0033572;Unigene0033770;Unigene0036303;Unigene0038942;Unigene0040968;Unigene0042178;Unigene0042407	K14682+K13427+K14455+K14677+K01940+K00611+K01427+K00818+K14454+K01915+K00145+K00814+K00262+K00811+K00930+K14272
2-Oxocarboxylic acid metabolism	27	74	0.00979276	0.0701815	ko01210	Unigene0000536;Unigene0001722;Unigene0002710;Unigene0012939;Unigene0016057;Unigene0016590;Unigene0020910;Unigene0020958;Unigene0023508;Unigene0026828;Unigene0031906;Unigene0031909;Unigene0032238;Unigene0032551;Unigene0032995;Unigene0033770;Unigene0035755;Unigene0035821;Unigene0036303;Unigene0036690;Unigene0039012;Unigene0039098;Unigene0040098;Unigene0040968;Unigene0041943;Unigene0042178;Unigene00…	K14682+K01687+K00031+K00052+K14455+K14677+K11820+K00826+K11820+K01649+K00030+K00818+K01704+K14454+K00826+K00145+K01653+K00053+K00814+K01703+K01647+K00928+K00031+K00811+K01647+K00930+K14272
Basal transcription factors	20	51	0.0103459	0.0702436	ko03022	Unigene0002229;Unigene0004105;Unigene0004378;Unigene0006403;Unigene0013755;Unigene0014144;Unigene0019727;Unigene0019997;Unigene0022001;Unigene0026607;Unigene0029637;Unigene0030169;Unigene0030399;Unigene0032020;Unigene0032634;Unigene0033283;Unigene0035469;Unigene0036219;Unigene0038692;Unigene0040350	K10844+K02202+K03138+K03135+K03136+K03128+K03143+K03124+K03132+K03130+K14649+K10843+K03133+K03124+K03137+K03141+K06634+K03125+K03129+K03123
Metabolic pathways	624	2453	0.0112397	0.0724961	ko01100	Unigene0000003;Unigene0000092;Unigene0000116;Unigene0000126;Unigene0000156;Unigene0000284;Unigene0000299;Unigene0000350;Unigene0000453;Unigene0000508;Unigene0000536;Unigene0000559;Unigene0000566;Unigene0000642;Unigene0000646;Unigene0000696;Unigene0000707;Unigene0001035;Unigene0001149;Unigene0001289;Unigene0001354;Unigene0001375;Unigene0001505;Unigene0001716;Unigene0001722;Unigene0001740;Unigene00…	K00737+K00264+K01754+K01955+K01115+K00895+K02327+K00888+K00029+K00921+K14682+K00889+K01231+K03006+K01228+K00938+K00968+K11262+K00028+K00413+K02149+K02704+K05349+K18121+K01687+K00430+K03023+K07512+K02695+K00789+K01431+K01835+K05350+K00995+K00700+K01836+K01051+K13811+K01205+K15920+K00602+K00748+K00820+K04718+K01081+K05305+K06126+K00454+K00382+K01904+K00031+K01214+K05278+K12446+K00939+K00547+K13800+…
Proteasome	25	69	0.0139119	0.0841614	ko03050	Unigene0000636;Unigene0001894;Unigene0002210;Unigene0002424;Unigene0002623;Unigene0005853;Unigene0007261;Unigene0007694;Unigene0013196;Unigene0014415;Unigene0017382;Unigene0019553;Unigene0021509;Unigene0022242;Unigene0026946;Unigene0029513;Unigene0032411;Unigene0033529;Unigene0035104;Unigene0035767;Unigene0037135;Unigene0038581;Unigene0039006;Unigene0040986;Unigene0041598	K06699+K03033+K03029+K06691+K02731+K03066+K03039+K02727+K03031+K03037+K02729+K02735+K02739+K03065+K03063+K03033+K03062+K03030+K03064+K10881+K02726+K02730+K06700+K03028+K03036
Histidine metabolism	10	21	0.0148092	0.0841614	ko00340	Unigene0011505;Unigene0013024;Unigene0014609;Unigene0018822;Unigene0033114;Unigene0033425;Unigene0034724;Unigene0037836;Unigene0039674;Unigene0039904	K01590+K01693+K00765+K00128+K18649+K11755+K00817+K01663+K00128+K01814
Thiamine metabolism	11	24	0.0150055	0.0841614	ko00730	Unigene0002809;Unigene0003446;Unigene0004244;Unigene0026066;Unigene0026533;Unigene0029555;Unigene0033632;Unigene0036340;Unigene0036582;Unigene0037438;Unigene0040164	K00939+K01662+K00939+K00949+K06928+K00878+K01662+K00939+K14153+K06949+K00939
Ribosome biogenesis in eukaryotes	39	120	0.0189323	0.101761	ko03008	Unigene0000012;Unigene0000158;Unigene0000270;Unigene0001041;Unigene0001252;Unigene0001708;Unigene0002319;Unigene0002696;Unigene0003094;Unigene0003857;Unigene0004091;Unigene0004612;Unigene0007314;Unigene0007580;Unigene0009638;Unigene0009664;Unigene0014688;Unigene0016070;Unigene0017945;Unigene0018194;Unigene0020371;Unigene0022297;Unigene0023403;Unigene0026105;Unigene0032721;Unigene0033081;Unigene00…	K14536+K14559+K14521+K14554+K11130+K11131+K06943+K14571+K14556+K14560+K14567+K14561+K14573+K14552+K11108+K14572+K07562+K14568+K14563+K03539+K14546+K14290+K14558+K14549+K03537+K14565+K07936+K03097+K01164+K12619+K14566+K06943+K14538+K14569+K14537+K14548+K14550+K03538+K14574
Folate biosynthesis	12	28	0.0205325	0.105948	ko00790	Unigene0001531;Unigene0007625;Unigene0013721;Unigene0014140;Unigene0023446;Unigene0025191;Unigene0026019;Unigene0028295;Unigene0032916;Unigene0034193;Unigene0041665;Unigene0042432	K15631+K13941+K01930+K18482+K03637+K01930+K13998+K01724+K00079+K18482+K20457+K15376
Terpenoid backbone biosynthesis	23	65	0.0238891	0.118527	ko00900	Unigene0000696;Unigene0003446;Unigene0004270;Unigene0007922;Unigene0008855;Unigene0009893;Unigene0010769;Unigene0012304;Unigene0014166;Unigene0014784;Unigene0024139;Unigene0024751;Unigene0025261;Unigene0026435;Unigene0030189;Unigene0033632;Unigene0034306;Unigene0036155;Unigene0039322;Unigene0039819;Unigene0040387;Unigene0041209;Unigene0042852	K00938+K01662+K03526+K05955+K13789+K01823+K11778+K01597+K01641+K00919+K15891+K00021+K05356+K10960+K13789+K01662+K05906+K11778+K00991+K06013+K00099+K11778+K00021
Protein export	20	56	0.0305599	0.146008	ko03060	Unigene0001621;Unigene0006734;Unigene0010083;Unigene0011986;Unigene0016651;Unigene0020087;Unigene0020370;Unigene0023389;Unigene0028305;Unigene0032016;Unigene0032727;Unigene0035913;Unigene0035936;Unigene0038749;Unigene0041204;Unigene0041276;Unigene0041595;Unigene0042022;Unigene0042319;Unigene0042802	K12272+K03105+K03217+K09648+K09481+K13431+K03070+K03106+K03106+K10956+K03107+K03070+K03217+K09540+K12275+K09647+K03217+K03110+K03070+K09647
Alanine, aspartate and glutamate metabolism	21	61	0.0403871	0.186069	ko00250	Unigene0000092;Unigene0000126;Unigene0002452;Unigene0007156;Unigene0010301;Unigene0014576;Unigene0016057;Unigene0017767;Unigene0025777;Unigene0027095;Unigene0032551;Unigene0032832;Unigene0033014;Unigene0033042;Unigene0033572;Unigene0036303;Unigene0038603;Unigene0038942;Unigene0040606;Unigene0040968;Unigene0042407	K00264+K01955+K00820+K00827+K00294+K00609+K14455+K01940+K00830+K01580+K14454+K01939+K01756+K00764+K01915+K00814+K13566+K00262+K01956+K00811+K14272
Glycerolipid metabolism	29	90	0.0435659	0.190136	ko00561	Unigene0003961;Unigene0004669;Unigene0006025;Unigene0008936;Unigene0008949;Unigene0009217;Unigene0011318;Unigene0013799;Unigene0017103;Unigene0017850;Unigene0018142;Unigene0018822;Unigene0022487;Unigene0026103;Unigene0029413;Unigene0030862;Unigene0032428;Unigene0032815;Unigene0032999;Unigene0033331;Unigene0034735;Unigene0034907;Unigene0035601;Unigene0035876;Unigene0036218;Unigene0036546;Unigene00…	K14674+K01054+K06119+K07407+K01054+K00864+K13508+K22848+K13519+K13513+K01054+K00128+K00863+K13523+K06118+K15728+K00679+K01054+K00901+K15918+K00002+K00655+K03715+K18693+K21362+K00630+K09480+K00128+K09480
Pyruvate metabolism	35	112	0.0442178	0.190136	ko00620	Unigene0000453;Unigene0001035;Unigene0001149;Unigene0002643;Unigene0004455;Unigene0005947;Unigene0011085;Unigene0012981;Unigene0014654;Unigene0016729;Unigene0017057;Unigene0018167;Unigene0018684;Unigene0018822;Unigene0019236;Unigene0022822;Unigene0026029;Unigene0026828;Unigene0028413;Unigene0032344;Unigene0032710;Unigene0033267;Unigene0033316;Unigene0034965;Unigene0034976;Unigene0035200;Unigene00…	K00029+K11262+K00028+K00382+K01512+K01962+K00873+K00026+K01895+K00873+K00028+K18881+K01961+K00128+K00026+K00873+K01679+K01649+K00016+K00162+K00873+K00627+K00873+K00161+K01595+K00873+K00627+K01006+K00026+K01913+K00128+K01962+K00162+K00051+K00102
RNA degradation	45	150	0.0485865	0.202182	ko03018	Unigene0000166;Unigene0000314;Unigene0000652;Unigene0001369;Unigene0001972;Unigene0002162;Unigene0002232;Unigene0002547;Unigene0006359;Unigene0007134;Unigene0008585;Unigene0010687;Unigene0011944;Unigene0014683;Unigene0016724;Unigene0017093;Unigene0019460;Unigene0020806;Unigene0022988;Unigene0023053;Unigene0024117;Unigene0027340;Unigene0028748;Unigene0030108;Unigene0030925;Unigene0031289;Unigene00…	K12607+K12616+K10643+K03678+K11600+K12598+K04077+K04077+K13126+K12593+K00962+K00962+K12608+K00850+K01689+K12603+K01148+K12599+K12580+K12587+K01689+K03681+K12604+K12623+K12605+K04077+K01689+K12581+K12603+K00850+K00850+K13126+K12585+K12627+K12614+K12608+K12581+K12619+K12617+K10643+K12603+K13126+K12591+K12600+K12598
One carbon pool by folate	11	28	0.0502435	0.202544	ko00670	Unigene0002418;Unigene0002963;Unigene0009356;Unigene0012077;Unigene0017509;Unigene0024189;Unigene0025891;Unigene0026019;Unigene0035379;Unigene0039046;Unigene0039464	K00602+K00604+K00297+K00288+K01938+K00605+K00600+K13998+K01934+K01433+K01934
Propanoate metabolism	17	49	0.0571902	0.211791	ko00640	Unigene0001035;Unigene0002643;Unigene0005947;Unigene0007581;Unigene0014476;Unigene0014654;Unigene0018242;Unigene0018684;Unigene0028413;Unigene0032579;Unigene0033472;Unigene0037552;Unigene0038261;Unigene0039494;Unigene0039615;Unigene0039700;Unigene0040590	K11262+K00382+K01962+K00140+K05605+K01895+K01900+K01961+K00016+K05605+K01578+K00140+K00249+K09699+K00167+K01962+K01899
mRNA surveillance pathway	48	163	0.057362	0.211791	ko03015	Unigene0000306;Unigene0000311;Unigene0001161;Unigene0003021;Unigene0003288;Unigene0003902;Unigene0004897;Unigene0006359;Unigene0006883;Unigene0008796;Unigene0011016;Unigene0013108;Unigene0014353;Unigene0014897;Unigene0018737;Unigene0018895;Unigene0021669;Unigene0022259;Unigene0022346;Unigene0022644;Unigene0023046;Unigene0023419;Unigene0025964;Unigene0026125;Unigene0026313;Unigene0026944;Unigene00…	K14326+K14962+K14406+K14327+K06100+K14324+K14962+K13126+K14403+K14416+K14376+K14407+K06100+K13114+K11583+K03456+K13917+K12875+K14404+K12876+K03267+K13025+K04382+K14399+K00565+K14411+K14409+K14396+K12882+K14400+K14396+K14411+K12812+K12812+K13126+K14402+K14397+K12877+K00565+K13917+K06965+K11584+K03456+K14411+K13126+K11584+K14404+K14401
Selenocompound metabolism	9	22	0.0574627	0.211791	ko00450	Unigene0002287;Unigene0002384;Unigene0005826;Unigene0011279;Unigene0014894;Unigene0033789;Unigene0036530;Unigene0039992;Unigene0042725	K13811+K01874+K01760+K01874+K01761+K11717+K00384+K08247+K01739
Mismatch repair	25	78	0.0613536	0.21985	ko03430	Unigene0000299;Unigene0001242;Unigene0002361;Unigene0012668;Unigene0013520;Unigene0015464;Unigene0016610;Unigene0017293;Unigene0020677;Unigene0022807;Unigene0027497;Unigene0030127;Unigene0031426;Unigene0035211;Unigene0035212;Unigene0035518;Unigene0035980;Unigene0036599;Unigene0037467;Unigene0038695;Unigene0038965;Unigene0039826;Unigene0039886;Unigene0041445;Unigene0042184	K02327+K08735+K10747+K10754+K03504+K07466+K07466+K10858+K10747+K10756+K10755+K07466+K10739+K03505+K03505+K04802+K03111+K08739+K07456+K10740+K08734+K08737+K02328+K10755+K10755
Monobactam biosynthesis	5	10	0.0654986	0.22836	ko00261	Unigene0002287;Unigene0007636;Unigene0022687;Unigene0037355;Unigene0039098	K13811+K01714+K00215+K12524+K00928
Cysteine and methionine metabolism	34	112	0.0679116	0.230542	ko00270	Unigene0001842;Unigene0002855;Unigene0004419;Unigene0004585;Unigene0005278;Unigene0005375;Unigene0005826;Unigene0007156;Unigene0008344;Unigene0008439;Unigene0008534;Unigene0009192;Unigene0010622;Unigene0012650;Unigene0012981;Unigene0013042;Unigene0014894;Unigene0015719;Unigene0016057;Unigene0017173;Unigene0018624;Unigene0019236;Unigene0020958;Unigene0025585;Unigene0028413;Unigene0032285;Unigene00…	K00789+K00547+K00547+K16054+K00558+K01011+K01760+K00827+K00899+K00797+K00547+K01738+K01244+K13034+K00026+K00797+K01761+K00640+K14455+K01919+K21456+K00026+K00826+K00640+K00016+K00815+K14454+K00826+K01251+K12524+K00026+K00928+K00811+K01739
Tyrosine metabolism	17	51	0.0803017	0.265613	ko00350	Unigene0003644;Unigene0016057;Unigene0019055;Unigene0022857;Unigene0026644;Unigene0029596;Unigene0030133;Unigene0031098;Unigene0032285;Unigene0032540;Unigene0032551;Unigene0033296;Unigene0033399;Unigene0033401;Unigene0034724;Unigene0039765;Unigene0040968	K00121+K14455+K00121+K07253+K00451+K00422+K00001+K00276+K00815+K00422+K14454+K01555+K00422+K00422+K00817+K00422+K00811
Porphyrin and chlorophyll metabolism	19	59	0.0906184	0.28207	ko00860	Unigene0004703;Unigene0007793;Unigene0012669;Unigene0013153;Unigene0017359;Unigene0020407;Unigene0021911;Unigene0026435;Unigene0028113;Unigene0030199;Unigene0032313;Unigene0032327;Unigene0033018;Unigene0036512;Unigene0037905;Unigene0039228;Unigene0040499;Unigene0040724;Unigene0042591	K08101+K01772+K01749+K04040+K01599+K01772+K18010+K10960+K00231+K01599+K04035+K03404+K13071+K00231+K02259+K08099+K02492+K13606+K13545
Lysine biosynthesis	6	14	0.0926259	0.28207	ko00300	Unigene0007636;Unigene0011723;Unigene0022687;Unigene0026235;Unigene0037355;Unigene0039098	K01714+K01586+K00215+K10206+K12524+K00928
Biosynthesis of secondary metabolites	335	1325	0.0944771	0.28207	ko01110	Unigene0000092;Unigene0000116;Unigene0000156;Unigene0000284;Unigene0000536;Unigene0000696;Unigene0001035;Unigene0001505;Unigene0001722;Unigene0001740;Unigene0001842;Unigene0002042;Unigene0002145;Unigene0002188;Unigene0002418;Unigene0002522;Unigene0002527;Unigene0002536;Unigene0002643;Unigene0002682;Unigene0002710;Unigene0002729;Unigene0002744;Unigene0002809;Unigene0002855;Unigene0003005;Unigene00…	K00264+K01754+K01115+K00895+K14682+K00938+K11262+K05349+K01687+K00430+K00789+K01835+K05350+K00700+K00602+K01081+K06126+K00454+K00382+K01904+K00031+K01214+K05278+K00939+K00547+K13679+K01952+K01626+K00588+K11752+K00232+K01662+K01613+K00121+K13427+K14674+K15227+K00939+K01792+K03526+K18447+K01114+K00547+K00232+K01834+K08101+K09835+K01733+K01695+K22389+K01760+K01962+K00083+K01114+K00827+K01783+K01714+…
Nicotinate and nicotinamide metabolism	9	24	0.0956952	0.28207	ko00760	Unigene0002522;Unigene0003352;Unigene0013654;Unigene0034408;Unigene0035178;Unigene0036313;Unigene0038596;Unigene0041019;Unigene0042017	K01081+K01513+K18551+K00858+K00763+K01950+K03787+K00767+K18551
Glucosinolate biosynthesis	5	11	0.09716	0.28207	ko00966	Unigene0020910;Unigene0020958;Unigene0023508;Unigene0032995;Unigene0036690	K11820+K00826+K11820+K00826+K01703
Glycosylphosphatidylinositol(GPI)-anchor biosynthesis	13	38	0.0983965	0.28207	ko00563	Unigene0004917;Unigene0007033;Unigene0010703;Unigene0013698;Unigene0026570;Unigene0030197;Unigene0032637;Unigene0035103;Unigene0036480;Unigene0036806;Unigene0039204;Unigene0039388;Unigene0039766	K03861+K05310+K05291+K05292+K11001+K05290+K09658+K03434+K03857+K05286+K05284+K07541+K03859
Fatty acid degradation	16	50	0.119386	0.330907	ko00071	Unigene0003416;Unigene0003644;Unigene0004638;Unigene0018822;Unigene0019055;Unigene0023304;Unigene0029370;Unigene0030133;Unigene0030212;Unigene0038261;Unigene0038716;Unigene0038917;Unigene0039011;Unigene0039669;Unigene0039674;Unigene0042173	K00232+K00121+K00232+K00128+K00121+K01897+K07517+K00001+K00232+K00249+K00232+K07517+K01897+K10527+K00128+K01897
Fructose and mannose metabolism	23	76	0.120563	0.330907	ko00051	Unigene0000284;Unigene0002524;Unigene0004300;Unigene0014683;Unigene0015412;Unigene0015858;Unigene0020344;Unigene0021457;Unigene0022487;Unigene0022679;Unigene0022868;Unigene0027317;Unigene0029315;Unigene0030243;Unigene0032679;Unigene0032819;Unigene0032838;Unigene0033239;Unigene0033803;Unigene0033888;Unigene0035994;Unigene0035996;Unigene0042137	K00895+K05305+K18447+K00850+K00847+K03841+K00844+K00847+K00863+K01623+K03841+K03841+K00008+K19355+K01103+K01803+K00966+K00850+K01805+K00850+K19355+K19355+K01711
Valine, leucine and isoleucine biosynthesis	10	29	0.131607	0.353694	ko00290	Unigene0000116;Unigene0001722;Unigene0012939;Unigene0020958;Unigene0026828;Unigene0032238;Unigene0032995;Unigene0035755;Unigene0035821;Unigene0036690	K01754+K01687+K00052+K00826+K01649+K01704+K00826+K01653+K00053+K01703
Sulfur relay system	5	12	0.135055	0.355552	ko04122	Unigene0005375;Unigene0008429;Unigene0023446;Unigene0031015;Unigene0034825	K01011+K12161+K03637+K11996+K14168
Sphingolipid metabolism	11	33	0.142142	0.363524	ko00600	Unigene0002498;Unigene0008936;Unigene0010291;Unigene0011939;Unigene0016437;Unigene0034535;Unigene0035896;Unigene0035990;Unigene0036329;Unigene0036876;Unigene0039753	K04718+K07407+K00654+K04712+K04715+K01634+K04708+K04710+K12309+K01190+K17108
Glycosphingolipid biosynthesis - ganglio series	2	3	0.143719	0.363524	ko00604	Unigene0023445;Unigene0036329	K12373+K12309
Phosphonate and phosphinate metabolism	3	6	0.151917	0.376871	ko00440	Unigene0000707;Unigene0013235;Unigene0042651	K00968+K00993+K00967
Glycosaminoglycan degradation	6	16	0.160752	0.391265	ko00531	Unigene0002328;Unigene0009188;Unigene0023445;Unigene0029857;Unigene0035301;Unigene0036329	K01205+K10532+K12373+K07964+K10532+K12309
Autophagy - other eukaryotes	17	57	0.181889	0.434514	ko04136	Unigene0000099;Unigene0000319;Unigene0000330;Unigene0000498;Unigene0002417;Unigene0002545;Unigene0004635;Unigene0024156;Unigene0025499;Unigene0025964;Unigene0030865;Unigene0031259;Unigene0032456;Unigene0033815;Unigene0037927;Unigene0040303;Unigene0040754	K07203+K07204+K17906+K08333+K08330+K08334+K17907+K08331+K00914+K04382+K08341+K17888+K08266+K08269+K17606+K08337+K17890
Isoquinoline alkaloid biosynthesis	10	31	0.185315	0.434648	ko00950	Unigene0016057;Unigene0029596;Unigene0031098;Unigene0032285;Unigene0032540;Unigene0032551;Unigene0033399;Unigene0033401;Unigene0039765;Unigene0040968	K14455+K00422+K00276+K00815+K00422+K14454+K00422+K00422+K00422+K00811
Arachidonic acid metabolism	6	17	0.200997	0.460098	ko00590	Unigene0003961;Unigene0032916;Unigene0034838;Unigene0038004;Unigene0038733;Unigene0042289	K14674+K00079+K15730+K05309+K01254+K00432
beta-Alanine metabolism	17	58	0.203299	0.460098	ko00410	Unigene0001893;Unigene0004478;Unigene0007581;Unigene0008439;Unigene0010643;Unigene0013042;Unigene0014476;Unigene0018822;Unigene0024134;Unigene0027095;Unigene0031098;Unigene0032579;Unigene0033472;Unigene0037552;Unigene0038261;Unigene0039674;Unigene0041654	K01431+K17839+K00140+K00797+K13366+K00797+K05605+K00128+K01918+K01580+K00276+K05605+K01578+K00140+K00249+K00128+K01464
Pyrimidine metabolism	48	182	0.235238	0.522046	ko00240	Unigene0000126;Unigene0000299;Unigene0000642;Unigene0001673;Unigene0001755;Unigene0001893;Unigene0002522;Unigene0002918;Unigene0003009;Unigene0003352;Unigene0004132;Unigene0005512;Unigene0006043;Unigene0007997;Unigene0008166;Unigene0008585;Unigene0010687;Unigene0011867;Unigene0012144;Unigene0012632;Unigene0013339;Unigene0013520;Unigene0014576;Unigene0014738;Unigene0015444;Unigene0015880;Unigene00…	K01955+K02327+K03006+K01510+K03023+K01431+K01081+K13800+K03002+K01513+K03012+K03017+K02999+K03019+K02335+K00962+K00962+K10807+K01510+K03015+K03020+K03504+K00609+K03021+K03013+K16329+K10808+K13998+K03024+K13421+K03010+K02326+K03506+K03505+K03505+K03016+K00876+K03787+K03026+K00254+K14641+K01465+K03005+K02328+K03025+K00943+K01956+K01464
Glyoxylate and dicarboxylate metabolism	24	87	0.241192	0.522046	ko00630	Unigene0001716;Unigene0002643;Unigene0009524;Unigene0011019;Unigene0011489;Unigene0012981;Unigene0014654;Unigene0018117;Unigene0019236;Unigene0024189;Unigene0025777;Unigene0025891;Unigene0028393;Unigene0033331;Unigene0033572;Unigene0034006;Unigene0036070;Unigene0038309;Unigene0038543;Unigene0038720;Unigene0039012;Unigene0039046;Unigene0041943;Unigene0042407	K18121+K00382+K18121+K02437+K00281+K00026+K01895+K19269+K00026+K00605+K00830+K00600+K01601+K15918+K01915+K15919+K19269+K00026+K01913+K00284+K01647+K01433+K01647+K14272
Caffeine metabolism	2	4	0.242812	0.522046	ko00232	Unigene0027548;Unigene0039371	K00365+K00106
Tropane, piperidine and pyridine alkaloid biosynthesis	7	22	0.257531	0.544615	ko00960	Unigene0016057;Unigene0031098;Unigene0032285;Unigene0032551;Unigene0034724;Unigene0034823;Unigene0040968	K14455+K00276+K00815+K14454+K00817+K08081+K00811
Protein processing in endoplasmic reticulum	72	282	0.272854	0.567712	ko04141	Unigene0000059;Unigene0000069;Unigene0000114;Unigene0000229;Unigene0000297;Unigene0000304;Unigene0000646;Unigene0000944;Unigene0001978;Unigene0005619;Unigene0006343;Unigene0007841;Unigene0009570;Unigene0009606;Unigene0009671;Unigene0011099;Unigene0011703;Unigene0012518;Unigene0013811;Unigene0013835;Unigene0013876;Unigene0014101;Unigene0014189;Unigene0015116;Unigene0016651;Unigene0017522;Unigene00…	K08653+K14007+K14016+K09580+K14026+K10597+K01228+K11718+K10575+K13993+K03283+K10084+K10085+K01230+K09503+K03283+K09518+K13989+K03283+K13989+K10601+K09487+K07151+K12666+K09481+K09562+K07765+K06689+K10666+K13249+K13719+K13989+K12670+K09487+K10636+K14006+K13993+K13993+K09486+K13993+K05546+K12667+K14018+K13993+K09584+K10661+K10956+K01456+K14004+K09523+K04523+K08057+K14005+K03283+K09517+K03094+K08288+…
Peroxisome	29	109	0.282812	0.579091	ko04146	Unigene0002415;Unigene0002710;Unigene0003416;Unigene0004638;Unigene0004665;Unigene0009756;Unigene0012601;Unigene0013458;Unigene0013945;Unigene0019354;Unigene0023037;Unigene0023081;Unigene0023304;Unigene0025571;Unigene0025777;Unigene0026151;Unigene0029574;Unigene0030212;Unigene0031012;Unigene0031777;Unigene0033472;Unigene0033850;Unigene0036972;Unigene0038716;Unigene0039011;Unigene0039371;Unigene00…	K13338+K00031+K00232+K00232+K13348+K04564+K13347+K00477+K13348+K13344+K12663+K13348+K01897+K06664+K00830+K17879+K13337+K00232+K12261+K13336+K01578+K13341+K13346+K00232+K01897+K00106+K00031+K13339+K01897
Valine, leucine and isoleucine degradation	17	62	0.299054	0.60278	ko00280	Unigene0002643;Unigene0007156;Unigene0007581;Unigene0007920;Unigene0014166;Unigene0014476;Unigene0018822;Unigene0020958;Unigene0030300;Unigene0032579;Unigene0032995;Unigene0037552;Unigene0038261;Unigene0039494;Unigene0039615;Unigene0039674;Unigene0041486	K00382+K00827+K00140+K01969+K01641+K05605+K00128+K00826+K05607+K05605+K00826+K00140+K00249+K09699+K00167+K00128+K01968
Pantothenate and CoA biosynthesis	11	39	0.317911	0.63093	ko00770	Unigene0001722;Unigene0001893;Unigene0002092;Unigene0003352;Unigene0020958;Unigene0024134;Unigene0032995;Unigene0035755;Unigene0035821;Unigene0039868;Unigene0041654	K01687+K01431+K06133+K01513+K00826+K01918+K00826+K01653+K00053+K09680+K01464
Glycine, serine and threonine metabolism	23	87	0.324463	0.634178	ko00260	Unigene0000116;Unigene0002643;Unigene0004644;Unigene0004878;Unigene0004967;Unigene0007156;Unigene0011019;Unigene0011489;Unigene0012854;Unigene0014267;Unigene0020774;Unigene0024189;Unigene0025777;Unigene0025891;Unigene0031098;Unigene0032105;Unigene0033331;Unigene0034006;Unigene0036262;Unigene0037355;Unigene0039098;Unigene0041211;Unigene0042407	K01754+K00382+K01834+K01733+K01695+K00827+K02437+K00281+K01620+K01834+K00130+K00605+K00830+K00600+K00276+K01696+K15918+K15919+K00831+K12524+K00928+K01733+K14272
Riboflavin metabolism	6	20	0.337516	0.649843	ko00740	Unigene0003160;Unigene0003352;Unigene0008434;Unigene0019515;Unigene0029188;Unigene0029381	K11752+K01513+K11752+K14379+K18453+K00794
Carbon fixation in photosynthetic organisms	24	92	0.34598	0.656344	ko00710	Unigene0000453;Unigene0001149;Unigene0007173;Unigene0012981;Unigene0015858;Unigene0016057;Unigene0016384;Unigene0017057;Unigene0019236;Unigene0022679;Unigene0022868;Unigene0023973;Unigene0027317;Unigene0028393;Unigene0032551;Unigene0032819;Unigene0032952;Unigene0033112;Unigene0034976;Unigene0035970;Unigene0036303;Unigene0038309;Unigene0041336;Unigene0042407	K00029+K00028+K01783+K00026+K03841+K14455+K00615+K00028+K00026+K01623+K03841+K00927+K03841+K01601+K14454+K01803+K01807+K00134+K01595+K01006+K00814+K00026+K00051+K14272
Sulfur metabolism	11	40	0.351484	0.657122	ko00920	Unigene0002287;Unigene0005375;Unigene0009192;Unigene0012650;Unigene0015096;Unigene0015719;Unigene0025585;Unigene0030155;Unigene0037754;Unigene0040248;Unigene0042725	K13811+K01011+K01738+K13034+K00392+K00640+K00640+K15422+K05907+K00387+K01739
DNA replication	24	95	0.413488	0.761999	ko03030	Unigene0000299;Unigene0002361;Unigene0005918;Unigene0008166;Unigene0012668;Unigene0013520;Unigene0015464;Unigene0016610;Unigene0020677;Unigene0022807;Unigene0027497;Unigene0029484;Unigene0030127;Unigene0031023;Unigene0031258;Unigene0031426;Unigene0035211;Unigene0035212;Unigene0035518;Unigene0035980;Unigene0038695;Unigene0039886;Unigene0041445;Unigene0042184	K02327+K10747+K04799+K02335+K10754+K03504+K07466+K07466+K10747+K10756+K10755+K02326+K07466+K03506+K10743+K10739+K03505+K03505+K04802+K03111+K10740+K02328+K10755+K10755
C5-Branched dibasic acid metabolism	4	14	0.438736	0.79714	ko00660	Unigene0012939;Unigene0032238;Unigene0035755;Unigene0036690	K00052+K01704+K01653+K01703
Citrate cycle (TCA cycle)	20	80	0.449003	0.799655	ko00020	Unigene0002643;Unigene0002710;Unigene0008276;Unigene0012981;Unigene0018242;Unigene0019236;Unigene0026029;Unigene0031906;Unigene0032344;Unigene0033267;Unigene0034965;Unigene0035288;Unigene0036481;Unigene0038309;Unigene0039012;Unigene0039795;Unigene0040098;Unigene0040590;Unigene0041035;Unigene0041943	K00382+K00031+K00234+K00026+K01900+K00026+K01679+K00030+K00162+K00627+K00161+K00627+K01648+K00026+K01647+K00162+K00031+K01899+K00658+K01647
Homologous recombination	26	105	0.452518	0.799655	ko03440	Unigene0000299;Unigene0004397;Unigene0006808;Unigene0008166;Unigene0011092;Unigene0011487;Unigene0013520;Unigene0015464;Unigene0016610;Unigene0016626;Unigene0018235;Unigene0023713;Unigene0030127;Unigene0031426;Unigene0033309;Unigene0035211;Unigene0035212;Unigene0035491;Unigene0035767;Unigene0035980;Unigene0037644;Unigene0038260;Unigene0038568;Unigene0038695;Unigene0039584;Unigene0039886	K02327+K03165+K20776+K02335+K10728+K10867+K03504+K07466+K07466+K10865+K10882+K10875+K07466+K10739+K10901+K03505+K03505+K11864+K10881+K03111+K03165+K10866+K10869+K10740+K10875+K02328
Butanoate metabolism	6	24	0.526887	0.918492	ko00650	Unigene0001716;Unigene0009524;Unigene0014166;Unigene0027095;Unigene0035755;Unigene0038068	K18121+K18121+K01641+K01580+K01653+K00074
Other types of O-glycan biosynthesis	4	16	0.553705	0.947667	ko00514	Unigene0000269;Unigene0011321;Unigene0038235;Unigene0040449	K09667+K20784+K20782+K09667
Other glycan degradation	7	29	0.558316	0.947667	ko00511	Unigene0015354;Unigene0023445;Unigene0036329;Unigene0036876;Unigene0038289;Unigene0038491;Unigene0039753	K01206+K12373+K12309+K01190+K01444+K01227+K17108
Endocytosis	49	214	0.659465	1	ko04144	Unigene0000156;Unigene0000559;Unigene0001464;Unigene0001522;Unigene0002721;Unigene0003856;Unigene0003932;Unigene0003991;Unigene0004625;Unigene0005025;Unigene0005086;Unigene0005825;Unigene0006343;Unigene0009435;Unigene0011099;Unigene0011145;Unigene0011800;Unigene0013811;Unigene0016999;Unigene0018007;Unigene0018849;Unigene0019340;Unigene0019384;Unigene0021749;Unigene0025137;Unigene0025215;Unigene00…	K01115+K00889+K12479+K01528+K19476+K12195+K07904+K15053+K12189+K05755+K12486+K12196+K03283+K12486+K03283+K12471+K18466+K03283+K12191+K11827+K05757+K19476+K12198+K07904+K12185+K10396+K12200+K05756+K07937+K07904+K12190+K11824+K12489+K03283+K10364+K12193+K11866+K07904+K05758+K11826+K12471+K19366+K07904+K12486+K12489+K10365+K19366+K12197+K19476
Flavone and flavonol biosynthesis	1	4	0.66424	1	ko00944	Unigene0033489	K05280
Glycosphingolipid biosynthesis - globo and isoglobo series	2	9	0.671948	1	ko00603	Unigene0008936;Unigene0023445	K07407+K12373
Brassinosteroid biosynthesis	5	23	0.673573	1	ko00905	Unigene0011523;Unigene0016572;Unigene0037786;Unigene0040802;Unigene0041599	K09590+K09591+K12637+K09587+K20623
Starch and sucrose metabolism	35	156	0.69481	1	ko00500	Unigene0001505;Unigene0002042;Unigene0002145;Unigene0002188;Unigene0002729;Unigene0003005;Unigene0003352;Unigene0004300;Unigene0010399;Unigene0010482;Unigene0011057;Unigene0013127;Unigene0013193;Unigene0015162;Unigene0015406;Unigene0015412;Unigene0017946;Unigene0020012;Unigene0020344;Unigene0021416;Unigene0021457;Unigene0021546;Unigene0021986;Unigene0027359;Unigene0030363;Unigene0030755;Unigene00…	K05349+K01835+K05350+K00700+K01214+K13679+K01513+K18447+K05349+K01810+K19893+K00963+K01194+K05349+K00705+K00847+K00963+K00703+K00844+K01188+K00847+K00975+K01188+K01193+K01176+K01835+K00705+K01187+K00688+K00975+K00700+K00700+K01188+K00703+K01214
Photosynthesis - antenna proteins	4	19	0.699144	1	ko00196	Unigene0008717;Unigene0030437;Unigene0039325;Unigene0040269	K08908+K08912+K08908+K14172
Circadian rhythm - plant	11	51	0.702509	1	ko04712	Unigene0001210;Unigene0014033;Unigene0030234;Unigene0032866;Unigene0033522;Unigene0034551;Unigene0034729;Unigene0034843;Unigene0036190;Unigene0038108;Unigene0040650	K12127+K12129+K12115+K12124+K16221+K10143+K03097+K12130+K12119+K16240+K12118
Phenylalanine metabolism	13	60	0.703998	1	ko00360	Unigene0002682;Unigene0003154;Unigene0010378;Unigene0016057;Unigene0017161;Unigene0022857;Unigene0031098;Unigene0032285;Unigene0032551;Unigene0034724;Unigene0038068;Unigene0039720;Unigene0040968	K01904+K00588+K00487+K14455+K01904+K07253+K00276+K00815+K14454+K00817+K00074+K01904+K00811
Fatty acid metabolism	21	96	0.715426	1	ko01212	Unigene0001035;Unigene0001759;Unigene0003416;Unigene0004638;Unigene0005947;Unigene0012181;Unigene0018684;Unigene0018911;Unigene0020031;Unigene0023304;Unigene0030212;Unigene0032071;Unigene0034707;Unigene0035289;Unigene0037665;Unigene0038261;Unigene0038716;Unigene0039011;Unigene0039669;Unigene0039700;Unigene0042173	K11262+K07512+K00232+K00232+K01962+K00208+K01961+K09458+K10251+K01897+K00232+K00645+K00648+K10781+K03921+K00249+K00232+K01897+K10527+K01962+K01897
Arginine and proline metabolism	18	83	0.720775	1	ko00330	Unigene0003790;Unigene0004478;Unigene0008439;Unigene0009528;Unigene0010301;Unigene0010643;Unigene0013042;Unigene0016057;Unigene0018822;Unigene0018881;Unigene0030150;Unigene0032551;Unigene0038343;Unigene0038677;Unigene0039674;Unigene0040968;Unigene0041289;Unigene0041862	K13427+K17839+K00797+K00472+K00294+K13366+K00797+K14455+K00128+K00472+K01259+K14454+K00472+K10536+K00128+K00811+K00286+K00286
Fatty acid biosynthesis	13	61	0.72766	1	ko00061	Unigene0001035;Unigene0005947;Unigene0012181;Unigene0018684;Unigene0018911;Unigene0023304;Unigene0032071;Unigene0034707;Unigene0035289;Unigene0037665;Unigene0039011;Unigene0039700;Unigene0042173	K11262+K01962+K00208+K01961+K09458+K01897+K00645+K00648+K10781+K03921+K01897+K01962+K01897
Nitrogen metabolism	9	44	0.756483	1	ko00910	Unigene0000092;Unigene0004875;Unigene0010299;Unigene0027637;Unigene0032667;Unigene0033572;Unigene0034015;Unigene0038720;Unigene0038942	K00264+K01673+K02575+K00366+K01673+K01915+K01673+K00284+K00262
Glycerophospholipid metabolism	27	125	0.75767	1	ko00564	Unigene0000156;Unigene0000707;Unigene0002170;Unigene0003507;Unigene0003961;Unigene0004358;Unigene0005009;Unigene0006346;Unigene0007937;Unigene0011318;Unigene0013054;Unigene0013235;Unigene0017103;Unigene0017850;Unigene0022457;Unigene0026103;Unigene0028679;Unigene0030862;Unigene0032755;Unigene0032999;Unigene0034592;Unigene0034907;Unigene0035798;Unigene0035876;Unigene0036546;Unigene0039596;Unigene00…	K01115+K00968+K00995+K01613+K14674+K01114+K22389+K01114+K00981+K13508+K00550+K00993+K13519+K13513+K01613+K13523+K01517+K15728+K08730+K00901+K00981+K00655+K06130+K18693+K00630+K05929+K00967
RNA polymerase	17	82	0.786339	1	ko03020	Unigene0000642;Unigene0001755;Unigene0003009;Unigene0004132;Unigene0005512;Unigene0006043;Unigene0007997;Unigene0012632;Unigene0013339;Unigene0014738;Unigene0015444;Unigene0028233;Unigene0029425;Unigene0035892;Unigene0038962;Unigene0039851;Unigene0040075	K03006+K03023+K03002+K03012+K03017+K02999+K03019+K03015+K03020+K03021+K03013+K03024+K03010+K03016+K03026+K03005+K03025
Ascorbate and aldarate metabolism	11	55	0.795888	1	ko00053	Unigene0017490;Unigene0018822;Unigene0024058;Unigene0024312;Unigene0033114;Unigene0033297;Unigene0035054;Unigene0037648;Unigene0037676;Unigene0038782;Unigene0039674	K12447+K00128+K00225+K14190+K18649+K08232+K00434+K08232+K16190+K00012+K00128
Carotenoid biosynthesis	9	46	0.803305	1	ko00906	Unigene0004803;Unigene0012339;Unigene0015752;Unigene0019067;Unigene0019740;Unigene0027326;Unigene0033628;Unigene0038294;Unigene0040089	K09835+K00514+K06444+K09841+K09843+K09840+K09837+K06443+K02293
Synthesis and degradation of ketone bodies	1	6	0.805501	1	ko00072	Unigene0014166	K01641
Lipoic acid metabolism	1	6	0.805501	1	ko00785	Unigene0003766	K03644
Indole alkaloid biosynthesis	1	6	0.805501	1	ko00901	Unigene0036307	K21026
Ubiquinone and other terpenoid-quinone biosynthesis	13	65	0.809737	1	ko00130	Unigene0002527;Unigene0002682;Unigene0010378;Unigene0017161;Unigene0019654;Unigene0020113;Unigene0022423;Unigene0032285;Unigene0036434;Unigene0039720;Unigene0041652;Unigene0042169;Unigene0042321	K06126+K01904+K00487+K01904+K05928+K03809+K00591+K00815+K03809+K01904+K06127+K12502+K14760
Pentose and glucuronate interconversions	15	75	0.822438	1	ko00040	Unigene0002280;Unigene0007173;Unigene0012090;Unigene0013127;Unigene0017490;Unigene0017946;Unigene0018796;Unigene0022655;Unigene0029315;Unigene0033803;Unigene0034735;Unigene0037448;Unigene0037676;Unigene0037980;Unigene0038782	K01051+K01783+K01051+K00963+K12447+K00963+K01051+K01051+K00008+K01805+K00002+K01728+K16190+K01213+K00012
Glutathione metabolism	20	98	0.823224	1	ko00480	Unigene0002710;Unigene0005989;Unigene0008439;Unigene0011867;Unigene0013042;Unigene0017173;Unigene0018577;Unigene0018624;Unigene0025730;Unigene0026039;Unigene0026688;Unigene0027320;Unigene0029233;Unigene0030254;Unigene0035054;Unigene0035881;Unigene0036279;Unigene0040098;Unigene0040547;Unigene0042289	K00031+K01256+K00797+K10807+K00797+K01919+K00033+K21456+K10808+K00033+K00036+K01469+K00799+K00799+K00434+K00799+K01255+K00031+K00036+K00432
Ubiquitin mediated proteolysis	39	186	0.848908	1	ko04120	Unigene0000304;Unigene0000775;Unigene0001792;Unigene0001978;Unigene0002390;Unigene0002989;Unigene0003120;Unigene0006039;Unigene0006199;Unigene0006661;Unigene0009026;Unigene0009208;Unigene0013106;Unigene0013201;Unigene0013876;Unigene0013898;Unigene0018046;Unigene0018183;Unigene0019388;Unigene0020183;Unigene0021995;Unigene0026268;Unigene0033228;Unigene0033976;Unigene0033985;Unigene0034182;Unigene00…	K10597+K10589+K20217+K10575+K10588+K03350+K03353+K10580+K10604+K10685+K03354+K03349+K10686+K03351+K10601+K10573+K06689+K04506+K04506+K10144+K10604+K10610+K10590+K04506+K03355+K10598+K10599+K10143+K03363+K03094+K10581+K03354+K03364+K03357+K10609+K03094+K03094+K06688+K10144
Taurine and hypotaurine metabolism	1	7	0.851978	1	ko00430	Unigene0027095	K01580
Photosynthesis	14	74	0.875262	1	ko00195	Unigene0001375;Unigene0001818;Unigene0004291;Unigene0006464;Unigene0006616;Unigene0011331;Unigene0014981;Unigene0019716;Unigene0027235;Unigene0028334;Unigene0034339;Unigene0034453;Unigene0035171;Unigene0039229	K02704+K02695+K02639+K02115+K08901+K02705+K02115+K02639+K02694+K02703+K08901+K08906+K02111+K02639
Cyanoamino acid metabolism	9	50	0.876189	1	ko00460	Unigene0001505;Unigene0002145;Unigene0010399;Unigene0012650;Unigene0015162;Unigene0021416;Unigene0021986;Unigene0025891;Unigene0039246	K05349+K05350+K05349+K13034+K05349+K01188+K01188+K00600+K01188
Ether lipid metabolism	6	36	0.89151	1	ko00565	Unigene0000156;Unigene0003961;Unigene0004358;Unigene0006346;Unigene0013235;Unigene0017103	K01115+K14674+K01114+K01114+K00993+K13519
alpha-Linolenic acid metabolism	10	56	0.891523	1	ko00592	Unigene0002536;Unigene0003416;Unigene0003961;Unigene0004638;Unigene0005009;Unigene0013133;Unigene0030212;Unigene0034069;Unigene0038716;Unigene0039669	K00454+K00232+K14674+K00232+K22389+K10528+K00232+K10526+K00232+K10527
Biotin metabolism	5	31	0.894366	1	ko00780	Unigene0003063;Unigene0012181;Unigene0018911;Unigene0032253;Unigene0039467	K00652+K00208+K09458+K01012+K19562
SNARE interactions in vesicular transport	9	52	0.903383	1	ko04130	Unigene0005509;Unigene0011139;Unigene0014808;Unigene0017647;Unigene0022211;Unigene0029478;Unigene0032915;Unigene0034867;Unigene0037380	K08488+K08490+K08515+K08495+K08490+K08515+K08486+K08517+K08503
Inositol phosphate metabolism	21	110	0.905743	1	ko00562	Unigene0000350;Unigene0000508;Unigene0000559;Unigene0004358;Unigene0006346;Unigene0007581;Unigene0008419;Unigene0012160;Unigene0021791;Unigene0025499;Unigene0028257;Unigene0030155;Unigene0032819;Unigene0033085;Unigene0033114;Unigene0034341;Unigene0034948;Unigene0037552;Unigene0039024;Unigene0039828;Unigene0040148	K00888+K00921+K00889+K01114+K01114+K00140+K01092+K05857+K00913+K00914+K10572+K15422+K01803+K01858+K18649+K00913+K19801+K00140+K01765+K03103+K00915
Steroid biosynthesis	8	48	0.915591	1	ko00100	Unigene0003961;Unigene0013940;Unigene0015934;Unigene0020716;Unigene0028487;Unigene0034727;Unigene0035347;Unigene0037336	K14674+K00222+K00227+K01824+K08246+K00801+K07748+K09828
Diterpenoid biosynthesis	3	22	0.924524	1	ko00904	Unigene0039096;Unigene0040672;Unigene0042145	K04122+K17961+K04123
Oxidative phosphorylation	34	175	0.934334	1	ko00190	Unigene0001289;Unigene0001354;Unigene0004725;Unigene0006464;Unigene0008276;Unigene0008910;Unigene0009031;Unigene0009196;Unigene0014153;Unigene0014981;Unigene0015094;Unigene0016091;Unigene0016108;Unigene0017372;Unigene0021019;Unigene0021246;Unigene0023747;Unigene0024016;Unigene0025445;Unigene0027159;Unigene0028219;Unigene0031605;Unigene0031972;Unigene0032027;Unigene0033714;Unigene0034212;Unigene00…	K00413+K02149+K03946+K02115+K00234+K02256+K02148+K02144+K03934+K02115+K03942+K05582+K02152+K00411+K00411+K02135+K02266+K03949+K03940+K02145+K02138+K03939+K02258+K02147+K02151+K03955+K02111+K03941+K03953+K00416+K02259+K02132+K02146+K01507
Lysine degradation	14	80	0.934473	1	ko00310	Unigene0000615;Unigene0000935;Unigene0008862;Unigene0018054;Unigene0018822;Unigene0024547;Unigene0034277;Unigene0034338;Unigene0034768;Unigene0035003;Unigene0038987;Unigene0039674;Unigene0041035;Unigene0041550	K11423+K22748+K19199+K11420+K00128+K11430+K11430+K18826+K19199+K11423+K11423+K00128+K00658+K14157
Monoterpenoid biosynthesis	1	10	0.934772	1	ko00902	Unigene0040011	K15095
Biosynthesis of unsaturated fatty acids	6	42	0.956942	1	ko01040	Unigene0003416;Unigene0004638;Unigene0020031;Unigene0030212;Unigene0037665;Unigene0038716	K00232+K00232+K10251+K00232+K03921+K00232
Phosphatidylinositol signaling system	19	110	0.963922	1	ko04070	Unigene0000350;Unigene0000387;Unigene0000508;Unigene0000559;Unigene0007937;Unigene0008419;Unigene0009038;Unigene0012160;Unigene0019443;Unigene0021791;Unigene0025499;Unigene0028257;Unigene0030155;Unigene0032999;Unigene0033114;Unigene0034341;Unigene0034592;Unigene0034948;Unigene0040148	K00888+K13024+K00921+K00889+K00981+K01092+K02183+K05857+K02183+K00913+K00914+K10572+K15422+K00901+K18649+K00913+K00981+K19801+K00915
MAPK signaling pathway - plant	31	169	0.967106	1	ko04016	Unigene0000943;Unigene0003583;Unigene0004740;Unigene0005394;Unigene0005403;Unigene0007084;Unigene0009038;Unigene0010881;Unigene0014119;Unigene0015347;Unigene0018825;Unigene0019443;Unigene0021233;Unigene0024011;Unigene0026138;Unigene0028289;Unigene0029623;Unigene0029734;Unigene0030744;Unigene0032232;Unigene0035089;Unigene0035136;Unigene0037473;Unigene0037474;Unigene0038131;Unigene0038223;Unigene00…	K17686+K14498+K20718+K13414+K14497+K20725+K02183+K20726+K14509+K14514+K14514+K02183+K14516+K20536+K13422+K17686+K13449+K20717+K20606+K13414+K20717+K20714+K20538+K20538+K14510+K20553+K20726+K14496+K13420+K13424+K20725
Zeatin biosynthesis	2	22	0.980585	1	ko00908	Unigene0016482;Unigene0041027	K10760+K00791
Sesquiterpenoid and triterpenoid biosynthesis	2	22	0.980585	1	ko00909	Unigene0024139;Unigene0034727	K15891+K00801
Fatty acid elongation	5	43	0.986717	1	ko00062	Unigene0001759;Unigene0003396;Unigene0020031;Unigene0026494;Unigene0041319	K07512+K01076+K10251+K15397+K15397
Phagosome	19	123	0.992215	1	ko04145	Unigene0000508;Unigene0000550;Unigene0001354;Unigene0005509;Unigene0009031;Unigene0009196;Unigene0016108;Unigene0016651;Unigene0025499;Unigene0027159;Unigene0032016;Unigene0032027;Unigene0032590;Unigene0032861;Unigene0033714;Unigene0034867;Unigene0038194;Unigene0039137;Unigene0040879	K00921+K07374+K02149+K08488+K02148+K02144+K02152+K09481+K00914+K02145+K10956+K02147+K08057+K07375+K02151+K08517+K08054+K08057+K02146
Tryptophan metabolism	6	53	0.99363	1	ko00380	Unigene0018822;Unigene0020910;Unigene0023508;Unigene0028510;Unigene0035920;Unigene0039674	K00128+K11820+K11820+K22450+K22450+K00128
ABC transporters	6	58	0.99751	1	ko02010	Unigene0000119;Unigene0011474;Unigene0021522;Unigene0032694;Unigene0033216;Unigene0035519	K05658+K05674+K05656+K05663+K05655+K05643
Flavonoid biosynthesis	10	85	0.998502	1	ko00941	Unigene0002744;Unigene0003154;Unigene0009060;Unigene0010378;Unigene0011758;Unigene0032176;Unigene0032473;Unigene0033489;Unigene0033633;Unigene0034528	K05278+K00588+K13065+K00487+K13065+K08695+K01859+K05280+K00475+K13082
Stilbenoid, diarylheptanoid and gingerol biosynthesis	4	52	0.999448	1	ko00945	Unigene0003154;Unigene0009060;Unigene0010378;Unigene0011758	K00588+K13065+K00487+K13065
Linoleic acid metabolism	2	37	0.999492	1	ko00591	Unigene0002536;Unigene0003961	K00454+K14674
Cutin, suberine and wax biosynthesis	1	29	0.99964	1	ko00073	Unigene0039049	K17991
Plant hormone signal transduction	45	286	0.999783	1	ko04075	Unigene0000035;Unigene0000667;Unigene0001061;Unigene0001136;Unigene0001469;Unigene0003533;Unigene0003583;Unigene0005403;Unigene0005565;Unigene0007567;Unigene0008369;Unigene0008728;Unigene0008960;Unigene0014119;Unigene0014717;Unigene0015347;Unigene0018174;Unigene0018762;Unigene0018825;Unigene0018975;Unigene0021233;Unigene0021515;Unigene0023156;Unigene0024481;Unigene0024833;Unigene0024834;Unigene00…	K14486+K13415+K14508+K14493+K14486+K14488+K14498+K14497+K14486+K14488+K14506+K14503+K14491+K14509+K14484+K14514+K14432+K14488+K14514+K14491+K14516+K14487+K14484+K14432+K14488+K14488+K13422+K14484+K14488+K13449+K14491+K14489+K13464+K13946+K14494+K14431+K13464+K14432+K13464+K14510+K14488+K14496+K14485+K14431+K13464
Phenylpropanoid biosynthesis	21	176	0.999983	1	ko00940	Unigene0001505;Unigene0001740;Unigene0002145;Unigene0002682;Unigene0003154;Unigene0006127;Unigene0009060;Unigene0010378;Unigene0010399;Unigene0011758;Unigene0014574;Unigene0015162;Unigene0017161;Unigene0021416;Unigene0021986;Unigene0029178;Unigene0036704;Unigene0036795;Unigene0039246;Unigene0039720;Unigene0040914	K05349+K00430+K05350+K01904+K00588+K00083+K13065+K00487+K05349+K13065+K12356+K05349+K01904+K01188+K01188+K00430+K18368+K00430+K01188+K01904+K22395
Plant-pathogen interaction	69	432	0.999987	1	ko04626	Unigene0000132;Unigene0001306;Unigene0001620;Unigene0003790;Unigene0005394;Unigene0006231;Unigene0006408;Unigene0006949;Unigene0006950;Unigene0008825;Unigene0009038;Unigene0009217;Unigene0009477;Unigene0012062;Unigene0012649;Unigene0013387;Unigene0014101;Unigene0014496;Unigene0014641;Unigene0014825;Unigene0016334;Unigene0018096;Unigene0018216;Unigene0018972;Unigene0019443;Unigene0021069;Unigene00…	K13459+K12795+K13412+K13427+K13414+K05391+K13448+K09422+K09422+K13412+K02183+K00864+K05391+K13448+K13448+K13412+K09487+K18835+K02358+K09422+K13448+K13412+K02358+K13412+K02183+K09422+K09422+K09487+K09422+K20536+K09422+K09422+K15397+K13412+K13448+K09422+K13448+K13457+K02358+K13449+K13459+K05391+K09422+K13448+K13414+K13448+K13448+K09422+K09422+K13448+K09422+K13457+K05391+K05391+K13436+K09422+K09422+…
Ribosome	58	483	1	1	ko03010	Unigene0000164;Unigene0002911;Unigene0003837;Unigene0006210;Unigene0006337;Unigene0007802;Unigene0008112;Unigene0009575;Unigene0010724;Unigene0011368;Unigene0013032;Unigene0013788;Unigene0014473;Unigene0014564;Unigene0015733;Unigene0019604;Unigene0020323;Unigene0021321;Unigene0021610;Unigene0021840;Unigene0022917;Unigene0022918;Unigene0023699;Unigene0023787;Unigene0024941;Unigene0025705;Unigene00…	K02941+K02906+K02923+K02981+K02881+K02908+K02976+K02950+K02896+K02936+K02922+K02934+K02887+K02911+K02989+K02871+K02921+K02949+K02892+K02974+K02881+K02881+K02897+K02935+K02883+K02990+K02985+K02868+K02925+K02984+K02867+K02942+K02935+K02906+K02864+K02902+K02882+K02937+K02896+K02910+K02930+K02930+K02948+K02939+K02899+K02863+K02946+K02904+K02988+K02987+K02935+K02903+K02995+K02872+K02935+K02952+K02975+…

## Sheet: MY
KEGG analysis result for single-copy genes in Chaenomeles sinensis(MY)
Pathway	out (1525)	All (6365)	Pvalue	Qvalue	Pathway ID	Genes	K_IDs
Non-homologous end-joining	8	8	1.07077e-05	0.00138129	ko03450	Unigene0002387;Unigene0002612;Unigene0017516;Unigene0018488;Unigene0019423;Unigene0035185;Unigene0036290;Unigene0037160	K10865+K10885+K03512+K10777+K10866+K04799+K10886+K10884
Purine metabolism	74	205	4.99455e-05	0.00322148	ko00230	Unigene0000746;Unigene0000998;Unigene0001311;Unigene0001674;Unigene0001741;Unigene0002284;Unigene0002535;Unigene0003275;Unigene0003291;Unigene0004017;Unigene0005006;Unigene0005656;Unigene0006072;Unigene0006101;Unigene0007279;Unigene0007460;Unigene0008502;Unigene0009345;Unigene0009796;Unigene0010073;Unigene0010260;Unigene0010479;Unigene0010714;Unigene0011044;Unigene0012345;Unigene0014799;Unigene00…	K00873+K00962+K01490+K01488+K03023+K01510+K00873+K03013+K01081+K03024+K01514+K03025+K03012+K03019+K00939+K03015+K00873+K02083+K14977+K01490+K02326+K01939+K03006+K18447+K01519+K02335+K00873+K00939+K03010+K00939+K00951+K01510+K00962+K00764+K00873+K01517+K03002+K11808+K00873+K03506+K03021+K03505+K03017+K06928+K03504+K00365+K10808+K01513+K01835+K01945+K01756+K00951+K03016+K13484+K01951+K01952+K02999+…
Aminoacyl-tRNA biosynthesis	31	70	0.000138906	0.0055831	ko00970	Unigene0000320;Unigene0000353;Unigene0000950;Unigene0001965;Unigene0002276;Unigene0002510;Unigene0002755;Unigene0007793;Unigene0009195;Unigene0010751;Unigene0016263;Unigene0021503;Unigene0023637;Unigene0024502;Unigene0024526;Unigene0025987;Unigene0026128;Unigene0027201;Unigene0031511;Unigene0032918;Unigene0033447;Unigene0034970;Unigene0035071;Unigene0035230;Unigene0035643;Unigene0035732;Unigene00…	K01870+K01868+K01872+K14164+K01867+K01893+K01868+K01881+K01875+K01883+K01875+K01866+K01887+K01880+K01874+K00604+K01886+K01876+K01889+K01869+K01883+K01889+K01874+K02434+K01869+K01893+K04567+K01890+K01873+K01872+K01873
Base excision repair	24	50	0.000173119	0.0055831	ko03410	Unigene0001610;Unigene0007213;Unigene0007773;Unigene0010260;Unigene0012001;Unigene0012008;Unigene0014799;Unigene0015757;Unigene0017516;Unigene0017780;Unigene0024930;Unigene0025347;Unigene0027055;Unigene0027077;Unigene0027143;Unigene0035185;Unigene0035756;Unigene0036258;Unigene0036695;Unigene0036729;Unigene0038511;Unigene0039088;Unigene0040726;Unigene0041027	K01247+K04802+K10801+K02326+K03660+K03575+K02335+K01247+K03512+K01246+K03506+K03505+K03648+K03504+K10747+K04799+K03505+K01246+K02327+K10773+K10747+K01142+K02328+K10803
N-Glycan biosynthesis	24	52	0.00036541	0.00819947	ko00510	Unigene0000416;Unigene0001009;Unigene0002465;Unigene0004018;Unigene0004830;Unigene0005855;Unigene0008887;Unigene0012511;Unigene0015569;Unigene0016214;Unigene0016433;Unigene0016683;Unigene0017610;Unigene0017856;Unigene0020015;Unigene0021687;Unigene0023456;Unigene0025284;Unigene0031625;Unigene0034204;Unigene0035784;Unigene0036463;Unigene0036931;Unigene0040862	K01231+K00902+K00729+K09658+K12666+K03849+K03843+K01230+K07151+K00737+K00721+K03849+K03847+K12670+K00737+K03850+K00726+K12667+K03846+K00737+K03842+K05546+K07432+K01228
Nucleotide excision repair	36	89	0.000381371	0.00819947	ko03420	Unigene0002115;Unigene0003429;Unigene0007213;Unigene0008039;Unigene0010260;Unigene0011796;Unigene0014799;Unigene0016267;Unigene0016510;Unigene0016577;Unigene0018576;Unigene0020089;Unigene0023615;Unigene0024930;Unigene0025347;Unigene0025586;Unigene0027077;Unigene0027098;Unigene0027143;Unigene0029031;Unigene0029280;Unigene0030209;Unigene0030274;Unigene0032122;Unigene0032245;Unigene0032477;Unigene00…	K03141+K10754+K04802+K10844+K02326+K10846+K02335+K10848+K10843+K10840+K10839+K10841+K10755+K03506+K03505+K10740+K03504+K10739+K10747+K10838+K07466+K07466+K07466+K10839+K10610+K10609+K03143+K03505+K02327+K06634+K10755+K10756+K10747+K02202+K10755+K02328
Spliceosome	88	268	0.000479324	0.00883325	ko03040	Unigene0000439;Unigene0000995;Unigene0002986;Unigene0003067;Unigene0005124;Unigene0005463;Unigene0006031;Unigene0006181;Unigene0006183;Unigene0006545;Unigene0007143;Unigene0007154;Unigene0007525;Unigene0007776;Unigene0008053;Unigene0008628;Unigene0009037;Unigene0009216;Unigene0010444;Unigene0010554;Unigene0011648;Unigene0011709;Unigene0012260;Unigene0012463;Unigene0012981;Unigene0013088;Unigene00…	K03283+K12855+K12876+K12869+K12826+K09564+K12858+K03283+K03283+K12856+K12823+K12831+K12823+K12829+K12850+K03283+K12879+K12882+K12823+K12837+K06063+K12843+K12662+K12852+K12820+K12896+K11099+K12823+K12863+K12860+K12821+K12822+K12819+K12821+K12870+K12839+K12828+K12623+K12823+K12893+K11088+K12627+K12877+K12875+K11094+K12867+K11087+K12833+K12897+K12741+K12830+K11097+K12868+K12818+K12741+K13025+K12857+…
Ribosome biogenesis in eukaryotes	39	101	0.000671331	0.0108252	ko03008	Unigene0001076;Unigene0002051;Unigene0004164;Unigene0006981;Unigene0010214;Unigene0011183;Unigene0011193;Unigene0013735;Unigene0017704;Unigene0018476;Unigene0018608;Unigene0019027;Unigene0019049;Unigene0021209;Unigene0023022;Unigene0026060;Unigene0026083;Unigene0027406;Unigene0028163;Unigene0030137;Unigene0030946;Unigene0032085;Unigene0032172;Unigene0032451;Unigene0034067;Unigene0034815;Unigene00…	K14563+K11108+K14538+K14558+K11130+K03097+K07936+K14572+K14569+K11131+K14559+K14550+K06943+K14546+K14290+K14552+K14560+K14571+K14536+K03539+K14565+K14549+K14556+K14521+K14537+K14561+K03538+K07562+K06943+K03537+K14566+K12619+K14567+K14568+K01164+K14548+K14574+K14573+K14554
Biosynthesis of amino acids	96	301	0.000823544	0.0118041	ko01230	Unigene0000158;Unigene0000746;Unigene0000868;Unigene0001266;Unigene0001332;Unigene0001398;Unigene0001457;Unigene0002221;Unigene0002351;Unigene0002535;Unigene0002571;Unigene0003277;Unigene0003328;Unigene0003605;Unigene0003614;Unigene0003841;Unigene0003976;Unigene0004647;Unigene0005141;Unigene0005538;Unigene0006400;Unigene0006683;Unigene0007340;Unigene0008422;Unigene0008502;Unigene0008650;Unigene00…	K01689+K00873+K00264+K00053+K01658+K01696+K01663+K01834+K00600+K00873+K01626+K01653+K01647+K01834+K15227+K01803+K00145+K01695+K00850+K01657+K11755+K00831+K01687+K00789+K00873+K00826+K01760+K14682+K00927+K00826+K12524+K00800+K14455+K01703+K01817+K01783+K00811+K05359+K00616+K13034+K00818+K00765+K00616+K01940+K00615+K00286+K00873+K14677+K01649+K14454+K00611+K00030+K00873+K10206+K00215+K00873+K01647+…
Mismatch repair	25	63	0.00387513	0.0490824	ko03430	Unigene0003416;Unigene0003429;Unigene0005077;Unigene0007213;Unigene0010447;Unigene0020794;Unigene0022997;Unigene0023615;Unigene0025347;Unigene0025586;Unigene0027077;Unigene0027098;Unigene0027143;Unigene0029280;Unigene0030179;Unigene0030209;Unigene0030274;Unigene0035756;Unigene0036695;Unigene0038316;Unigene0038442;Unigene0038511;Unigene0040278;Unigene0040623;Unigene0040726	K03111+K10754+K10858+K04802+K08734+K08737+K07456+K10755+K03505+K10740+K03504+K10739+K10747+K07466+K08735+K07466+K07466+K03505+K02327+K10755+K10756+K10747+K10755+K08739+K02328
RNA transport	78	249	0.00418532	0.0490824	ko03013	Unigene0000006;Unigene0000069;Unigene0000087;Unigene0000189;Unigene0000316;Unigene0000366;Unigene0000464;Unigene0000682;Unigene0000922;Unigene0001432;Unigene0002896;Unigene0002986;Unigene0003065;Unigene0004843;Unigene0006162;Unigene0006535;Unigene0007150;Unigene0008173;Unigene0008675;Unigene0009037;Unigene0009120;Unigene0009216;Unigene0010537;Unigene0010699;Unigene0010969;Unigene0011193;Unigene00…	K03260+K14327+K14288+K14319+K09291+K14289+K13126+K14299+K14309+K14312+K13151+K12876+K03248+K14326+K14293+K03113+K14324+K05749+K00784+K12879+K03239+K12882+K14304+K14292+K14318+K07936+K14319+K14317+K14298+K03680+K13126+K14310+K14305+K12877+K12875+K05019+K03257+K14315+K03242+K14291+K14290+K03260+K03254+K03247+K18213+K03243+K14321+K03260+K03539+K03680+K13025+K03754+K13130+K12878+K14303+K03241+K03246+…
Terpenoid backbone biosynthesis	22	55	0.00585113	0.0592847	ko00900	Unigene0002595;Unigene0003024;Unigene0005531;Unigene0006637;Unigene0010762;Unigene0012655;Unigene0013786;Unigene0015121;Unigene0018842;Unigene0022780;Unigene0024967;Unigene0026013;Unigene0026238;Unigene0031545;Unigene0033033;Unigene0033698;Unigene0034100;Unigene0034344;Unigene0036473;Unigene0037275;Unigene0039529;Unigene0041091	K05955+K00099+K00919+K00021+K10960+K01823+K13789+K15891+K03526+K01597+K11778+K13789+K06013+K05906+K00991+K05356+K00021+K01662+K01641+K11778+K01662+K11778
RNA degradation	45	133	0.00597443	0.0592847	ko03018	Unigene0000158;Unigene0000260;Unigene0000464;Unigene0000876;Unigene0000991;Unigene0000998;Unigene0002013;Unigene0002140;Unigene0005030;Unigene0005141;Unigene0005642;Unigene0008118;Unigene0008773;Unigene0012025;Unigene0013095;Unigene0015780;Unigene0016943;Unigene0017964;Unigene0018163;Unigene0018944;Unigene0019430;Unigene0021068;Unigene0021265;Unigene0021784;Unigene0024054;Unigene0025179;Unigene00…	K01689+K12616+K13126+K12580+K12604+K00962+K12603+K12587+K12603+K00850+K12581+K12598+K03681+K03678+K01148+K10643+K13126+K04077+K12623+K12614+K12627+K04077+K00962+K11600+K12591+K12599+K01689+K00850+K04077+K12603+K12608+K12581+K12607+K12585+K12619+K13126+K12608+K12593+K12600+K12617+K12598+K10643+K01689+K00850+K12605
Phenylalanine, tyrosine and tryptophan biosynthesis	20	49	0.00646464	0.0595671	ko00400	Unigene0001332;Unigene0001398;Unigene0002571;Unigene0003614;Unigene0004647;Unigene0005538;Unigene0010198;Unigene0010223;Unigene0010954;Unigene0011280;Unigene0011314;Unigene0018214;Unigene0025178;Unigene0031275;Unigene0031680;Unigene0033542;Unigene0033936;Unigene0035957;Unigene0039647;Unigene0039648	K01658+K01696+K01626+K15227+K01695+K01657+K00800+K14455+K01817+K00811+K05359+K14454+K01735+K00817+K00815+K01626+K15227+K00891+K01626+K01626
Basal transcription factors	20	50	0.00839899	0.0722314	ko03022	Unigene0001977;Unigene0002115;Unigene0007813;Unigene0008039;Unigene0016160;Unigene0016510;Unigene0018862;Unigene0022289;Unigene0023527;Unigene0023611;Unigene0031939;Unigene0034515;Unigene0034739;Unigene0035568;Unigene0036061;Unigene0037747;Unigene0038109;Unigene0038960;Unigene0039767;Unigene0040823	K14649+K03141+K03136+K10844+K03138+K10843+K03124+K03133+K03123+K03130+K03132+K03137+K03143+K03124+K03128+K06634+K03129+K03135+K02202+K03125
Vitamin B6 metabolism	9	17	0.00918608	0.0740627	ko00750	Unigene0006683;Unigene0010692;Unigene0018665;Unigene0027570;Unigene0027709;Unigene0029083;Unigene0030714;Unigene0032538;Unigene0035540	K00831+K06215+K00275+K08681+K05275+K00868+K00275+K01733+K01733
Metabolic pathways	625	2445	0.0098654	0.074861	ko01100	Unigene0000007;Unigene0000041;Unigene0000080;Unigene0000109;Unigene0000147;Unigene0000158;Unigene0000161;Unigene0000301;Unigene0000393;Unigene0000416;Unigene0000505;Unigene0000746;Unigene0000845;Unigene0000863;Unigene0000864;Unigene0000865;Unigene0000868;Unigene0000883;Unigene0000902;Unigene0001009;Unigene0001200;Unigene0001243;Unigene0001266;Unigene0001311;Unigene0001332;Unigene0001356;Unigene00…	K00281+K00487+K00763+K00993+K00921+K01689+K01955+K20279+K09680+K01231+K00654+K00873+K12446+K00888+K01190+K03934+K00264+K11262+K00949+K00902+K00416+K12447+K00053+K01490+K01658+K01057+K01724+K01696+K00830+K01663+K12448+K01205+K17108+K00876+K03434+K01488+K03946+K03023+K00128+K01465+K01834+K00600+K01051+K00729+K00873+K01824+K01568+K01626+K00912+K00099+K03103+K00972+K00012+K00968+K09841+K02258+K03013+…
Glycosylphosphatidylinositol(GPI)-anchor biosynthesis	13	29	0.010845	0.0777222	ko00563	Unigene0001569;Unigene0004018;Unigene0011825;Unigene0016311;Unigene0020145;Unigene0030254;Unigene0030304;Unigene0033959;Unigene0034119;Unigene0035839;Unigene0040034;Unigene0040052;Unigene0040255	K03434+K09658+K07541+K03859+K03857+K05290+K11001+K05292+K05284+K05291+K05310+K03861+K05286
mRNA surveillance pathway	48	149	0.0127308	0.0864356	ko03015	Unigene0000069;Unigene0000464;Unigene0002368;Unigene0002986;Unigene0004479;Unigene0004705;Unigene0004843;Unigene0007150;Unigene0007520;Unigene0007771;Unigene0008669;Unigene0009081;Unigene0009216;Unigene0010501;Unigene0012054;Unigene0012854;Unigene0016835;Unigene0016943;Unigene0016978;Unigene0017123;Unigene0019235;Unigene0019733;Unigene0019852;Unigene0020490;Unigene0022385;Unigene0024637;Unigene00…	K14327+K13126+K14403+K12876+K04382+K14406+K14326+K14324+K14396+K14962+K11584+K14404+K12882+K03456+K06100+K14962+K11583+K13126+K03267+K14397+K14401+K12877+K13917+K12875+K14396+K14399+K14411+K06965+K14404+K14416+K13025+K06100+K13917+K00565+K14400+K14402+K11584+K13114+K03456+K00565+K12812+K12812+K14411+K14409+K13126+K14376+K14407+K14411
Pyrimidine metabolism	48	150	0.014489	0.0933192	ko00240	Unigene0000161;Unigene0000998;Unigene0001545;Unigene0001741;Unigene0001996;Unigene0002284;Unigene0003275;Unigene0003291;Unigene0004017;Unigene0005656;Unigene0006072;Unigene0006101;Unigene0007460;Unigene0010260;Unigene0010714;Unigene0014799;Unigene0015772;Unigene0017766;Unigene0018491;Unigene0019277;Unigene0020417;Unigene0020799;Unigene0021265;Unigene0023128;Unigene0024930;Unigene0024938;Unigene00…	K01955+K00962+K00876+K03023+K01465+K01510+K03013+K01081+K03024+K03025+K03012+K03019+K03015+K02326+K03006+K02335+K01956+K00609+K13800+K03010+K01510+K13998+K00962+K03002+K03506+K03021+K03505+K03017+K03504+K10808+K01513+K03016+K02999+K14641+K00254+K13421+K03026+K03020+K01431+K03787+K03505+K02327+K16329+K10807+K00943+K03005+K01464+K02328
Valine, leucine and isoleucine biosynthesis	10	21	0.0151915	0.0933192	ko00290	Unigene0001266;Unigene0003277;Unigene0007340;Unigene0008650;Unigene0009317;Unigene0010424;Unigene0018205;Unigene0025961;Unigene0028219;Unigene0039884	K00053+K01653+K01687+K00826+K00826+K01703+K01649+K01754+K00052+K01704
2-Oxocarboxylic acid metabolism	27	77	0.0180481	0.105827	ko01210	Unigene0001266;Unigene0003277;Unigene0003328;Unigene0003976;Unigene0006381;Unigene0006949;Unigene0007340;Unigene0008650;Unigene0009097;Unigene0009317;Unigene0010223;Unigene0010424;Unigene0011280;Unigene0012558;Unigene0017658;Unigene0018205;Unigene0018214;Unigene0021485;Unigene0024785;Unigene0028219;Unigene0028292;Unigene0029077;Unigene0031501;Unigene0031961;Unigene0037710;Unigene0039884;Unigene00…	K00053+K01653+K01647+K00145+K11820+K11820+K01687+K00826+K14682+K00826+K14455+K01703+K00811+K00818+K14677+K01649+K14454+K00030+K01647+K00052+K00814+K00930+K00031+K00031+K14272+K01704+K00928
Proteasome	25	71	0.0211808	0.118797	ko03050	Unigene0000355;Unigene0001369;Unigene0003046;Unigene0004110;Unigene0004491;Unigene0004669;Unigene0005240;Unigene0006749;Unigene0009199;Unigene0014792;Unigene0016151;Unigene0016354;Unigene0018146;Unigene0018176;Unigene0018193;Unigene0018615;Unigene0019893;Unigene0022620;Unigene0030324;Unigene0031537;Unigene0032103;Unigene0032619;Unigene0034062;Unigene0037982;Unigene0038555	K06699+K03033+K02727+K03030+K02726+K03029+K03031+K02730+K02731+K02739+K03063+K03064+K03062+K03066+K02729+K03028+K03037+K03065+K06700+K10881+K03033+K03039+K02735+K03036+K06691
One carbon pool by folate	11	26	0.0296658	0.154551	ko00670	Unigene0002351;Unigene0004555;Unigene0004778;Unigene0020799;Unigene0025987;Unigene0029891;Unigene0034645;Unigene0035842;Unigene0037088;Unigene0038082;Unigene0040139	K00600+K00605+K01934+K13998+K00604+K00288+K01934+K01433+K01938+K00602+K00297
Pentose phosphate pathway	25	73	0.0299517	0.154551	ko00030	Unigene0001356;Unigene0004854;Unigene0005141;Unigene0010961;Unigene0011617;Unigene0013607;Unigene0015483;Unigene0018926;Unigene0018973;Unigene0020153;Unigene0020752;Unigene0021096;Unigene0028074;Unigene0029324;Unigene0030799;Unigene0032594;Unigene0032895;Unigene0033026;Unigene0033765;Unigene0035073;Unigene0035342;Unigene0036041;Unigene0039460;Unigene0039870;Unigene0040511	K01057+K01810+K00850+K01783+K00616+K00616+K00615+K03841+K00852+K00036+K03841+K00033+K00850+K01835+K01807+K00033+K00948+K01623+K00895+K00036+K00131+K03841+K01057+K01835+K00850
Arginine biosynthesis	16	43	0.0355263	0.176265	ko00220	Unigene0003976;Unigene0009097;Unigene0010223;Unigene0011280;Unigene0012558;Unigene0014828;Unigene0014914;Unigene0017658;Unigene0018214;Unigene0020662;Unigene0024071;Unigene0028292;Unigene0029077;Unigene0037710;Unigene0038900;Unigene0039992	K00145+K14682+K14455+K00811+K00818+K01940+K13427+K14677+K14454+K00611+K00262+K00814+K00930+K14272+K01427+K01915
Alanine, aspartate and glutamate metabolism	21	61	0.0418468	0.199935	ko00250	Unigene0000161;Unigene0000868;Unigene0001417;Unigene0009984;Unigene0010223;Unigene0010479;Unigene0011280;Unigene0014828;Unigene0015772;Unigene0017766;Unigene0018214;Unigene0021290;Unigene0021521;Unigene0022256;Unigene0024071;Unigene0028292;Unigene0031174;Unigene0031437;Unigene0035349;Unigene0037710;Unigene0039992	K01955+K00264+K00830+K01580+K14455+K01939+K00811+K01940+K01956+K00609+K14454+K00294+K00764+K00827+K00262+K00814+K01756+K13566+K00820+K14272+K01915
Galactose metabolism	23	70	0.0568641	0.260225	ko00052	Unigene0000864;Unigene0001243;Unigene0003751;Unigene0005141;Unigene0005189;Unigene0010061;Unigene0011845;Unigene0013596;Unigene0016999;Unigene0020981;Unigene0022007;Unigene0022509;Unigene0023430;Unigene0026062;Unigene0028074;Unigene0029186;Unigene0029324;Unigene0034226;Unigene0034937;Unigene0036607;Unigene0038874;Unigene0039870;Unigene0040511	K01190+K12447+K06617+K00850+K18819+K00963+K06617+K06617+K01187+K12309+K01193+K07407+K06617+K00965+K00850+K00844+K01835+K18819+K00963+K01784+K01785+K01835+K00850
Porphyrin and chlorophyll metabolism	19	56	0.0587987	0.260225	ko00860	Unigene0003863;Unigene0007545;Unigene0008625;Unigene0008916;Unigene0010762;Unigene0015389;Unigene0019378;Unigene0019779;Unigene0020039;Unigene0021666;Unigene0022320;Unigene0022429;Unigene0032270;Unigene0032832;Unigene0033401;Unigene0033728;Unigene0034339;Unigene0034463;Unigene0035880	K13545+K13606+K13071+K01599+K10960+K02492+K03404+K08099+K01772+K00231+K01772+K18010+K01599+K00231+K01749+K04040+K02259+K04035+K08101
Folate biosynthesis	12	32	0.0605175	0.260225	ko00790	Unigene0001389;Unigene0003859;Unigene0014348;Unigene0015091;Unigene0018851;Unigene0019906;Unigene0020324;Unigene0020799;Unigene0021327;Unigene0035634;Unigene0036773;Unigene0038873	K01724+K15376+K15631+K01930+K18482+K03637+K00079+K13998+K13941+K18482+K01930+K20457
Propanoate metabolism	17	50	0.0700785	0.285826	ko00640	Unigene0000883;Unigene0004373;Unigene0007735;Unigene0011818;Unigene0026466;Unigene0031326;Unigene0031489;Unigene0031994;Unigene0032341;Unigene0033280;Unigene0033845;Unigene0034848;Unigene0036373;Unigene0036437;Unigene0036712;Unigene0036964;Unigene0037607	K11262+K00167+K05605+K05605+K01578+K00140+K01900+K00382+K01962+K01899+K01895+K01962+K01961+K09699+K00249+K00140+K00016
Isoquinoline alkaloid biosynthesis	10	26	0.0709026	0.285826	ko00950	Unigene0010223;Unigene0011280;Unigene0015748;Unigene0018214;Unigene0020084;Unigene0024941;Unigene0028403;Unigene0031680;Unigene0037531;Unigene0037532	K14455+K00811+K00422+K14454+K00276+K00422+K00422+K00815+K00422+K00422
Thiamine metabolism	11	30	0.0819239	0.320248	ko00730	Unigene0000902;Unigene0007279;Unigene0019191;Unigene0019489;Unigene0026724;Unigene0028344;Unigene0033732;Unigene0034344;Unigene0037722;Unigene0038066;Unigene0039529	K00949+K00939+K00939+K00939+K06928+K00878+K06949+K01662+K00939+K14153+K01662
Lysine biosynthesis	6	14	0.09399	0.356609	ko00300	Unigene0009634;Unigene0021793;Unigene0023028;Unigene0027205;Unigene0035583;Unigene0039973	K12524+K10206+K00215+K01714+K01586+K00928
C5-Branched dibasic acid metabolism	4	8	0.0997756	0.367744	ko00660	Unigene0003277;Unigene0010424;Unigene0028219;Unigene0039884	K01653+K01703+K00052+K01704
Nicotinate and nicotinamide metabolism	9	25	0.121371	0.41419	ko00760	Unigene0000080;Unigene0003291;Unigene0025632;Unigene0029124;Unigene0031458;Unigene0031934;Unigene0035431;Unigene0035496;Unigene0039708	K00763+K01081+K00767+K01513+K00858+K01950+K18551+K03787+K18551
Biosynthesis of secondary metabolites	334	1325	0.123218	0.41419	ko01110	Unigene0000007;Unigene0000016;Unigene0000041;Unigene0000109;Unigene0000158;Unigene0000746;Unigene0000868;Unigene0000883;Unigene0001266;Unigene0001311;Unigene0001332;Unigene0001356;Unigene0001398;Unigene0001417;Unigene0001457;Unigene0001775;Unigene0002221;Unigene0002351;Unigene0002535;Unigene0002568;Unigene0002569;Unigene0002571;Unigene0003024;Unigene0003168;Unigene0003277;Unigene0003289;Unigene00…	K00281+K21371+K00487+K00993+K01689+K00873+K00264+K11262+K00053+K01490+K01658+K01057+K01696+K00830+K01663+K00128+K01834+K00600+K00873+K01824+K01568+K01626+K00099+K09841+K01653+K00627+K01081+K01647+K01613+K13519+K00161+K04123+K01834+K15227+K18368+K01803+K13545+K11752+K00145+K00167+K00605+K01695+K01810+K00850+K00232+K00919+K01657+K01214+K11752+K11820+K11755+K08081+K00021+K01918+K11820+K00939+K01687+…
Glycosaminoglycan degradation	6	15	0.126154	0.41419	ko00531	Unigene0001510;Unigene0020981;Unigene0021044;Unigene0025921;Unigene0036295;Unigene0039369	K01205+K12309+K10532+K12373+K07964+K10532
Protein export	20	65	0.126938	0.41419	ko03060	Unigene0001344;Unigene0004768;Unigene0010088;Unigene0010820;Unigene0016138;Unigene0018336;Unigene0018785;Unigene0019408;Unigene0019588;Unigene0020544;Unigene0025004;Unigene0029714;Unigene0031884;Unigene0032411;Unigene0032670;Unigene0036020;Unigene0036456;Unigene0038914;Unigene0040059;Unigene0040871	K03217+K09648+K12272+K03106+K09647+K09647+K03217+K03106+K10956+K09481+K12275+K13431+K03107+K03070+K03105+K09540+K03110+K03070+K03070+K03217
Cysteine and methionine metabolism	34	118	0.128431	0.41419	ko00270	Unigene0005993;Unigene0008080;Unigene0008422;Unigene0008650;Unigene0008933;Unigene0009317;Unigene0009634;Unigene0010014;Unigene0010223;Unigene0010336;Unigene0011028;Unigene0011280;Unigene0011689;Unigene0012381;Unigene0016528;Unigene0018214;Unigene0020152;Unigene0020597;Unigene0021298;Unigene0022256;Unigene0024827;Unigene0025006;Unigene0027437;Unigene0031680;Unigene0032070;Unigene0032867;Unigene00…	K21456+K00026+K00789+K00826+K01760+K00826+K12524+K00026+K14455+K01251+K00547+K00811+K13034+K00547+K00558+K14454+K16054+K01011+K00797+K00827+K01739+K01244+K00899+K00815+K00640+K00640+K01738+K01919+K00797+K00016+K01761+K00026+K00928+K00547
Sphingolipid metabolism	11	33	0.14489	0.455873	ko00600	Unigene0000505;Unigene0000864;Unigene0001523;Unigene0006102;Unigene0008597;Unigene0012077;Unigene0016286;Unigene0020981;Unigene0022509;Unigene0033747;Unigene0038896	K00654+K01190+K17108+K04715+K04712+K04708+K01634+K12309+K07407+K04710+K04718
Amino sugar and nucleotide sugar metabolism	42	151	0.152338	0.459662	ko00520	Unigene0000398;Unigene0000399;Unigene0000845;Unigene0001243;Unigene0001500;Unigene0003107;Unigene0003109;Unigene0004206;Unigene0004854;Unigene0005703;Unigene0007888;Unigene0009456;Unigene0010061;Unigene0010596;Unigene0013122;Unigene0019474;Unigene0025921;Unigene0025985;Unigene0026062;Unigene0028067;Unigene0029186;Unigene0029324;Unigene0030198;Unigene0032058;Unigene0032404;Unigene0032603;Unigene00…	K13648+K13648+K12446+K12447+K12448+K00972+K00012+K16190+K01810+K13648+K01209+K01836+K00963+K00966+K13648+K00847+K12373+K08679+K00965+K01183+K00844+K01835+K06118+K00975+K00326+K08678+K00847+K01183+K15920+K00963+K00820+K01784+K01183+K01711+K00975+K08679+K05305+K13648+K13648+K00326+K18677+K01835
Phosphonate and phosphinate metabolism	3	6	0.153221	0.459662	ko00440	Unigene0000109;Unigene0003156;Unigene0035776	K00993+K00968+K00967
DNA replication	24	82	0.157672	0.462266	ko03030	Unigene0003416;Unigene0003429;Unigene0007213;Unigene0010260;Unigene0014799;Unigene0015896;Unigene0023615;Unigene0024930;Unigene0025347;Unigene0025586;Unigene0027077;Unigene0027098;Unigene0027143;Unigene0029280;Unigene0030209;Unigene0030274;Unigene0035185;Unigene0035756;Unigene0036695;Unigene0038316;Unigene0038442;Unigene0038511;Unigene0040278;Unigene0040726	K03111+K10754+K04802+K02326+K02335+K10743+K10755+K03506+K03505+K10740+K03504+K10739+K10747+K07466+K07466+K07466+K04799+K03505+K02327+K10755+K10756+K10747+K10755+K02328
Homologous recombination	27	94	0.165941	0.475699	ko03440	Unigene0002387;Unigene0002747;Unigene0003416;Unigene0003495;Unigene0007187;Unigene0009798;Unigene0013701;Unigene0014799;Unigene0019423;Unigene0021764;Unigene0022865;Unigene0025347;Unigene0025586;Unigene0027077;Unigene0027098;Unigene0029280;Unigene0030209;Unigene0030274;Unigene0031537;Unigene0035756;Unigene0036480;Unigene0036695;Unigene0037706;Unigene0039351;Unigene0039907;Unigene0040726;Unigene00…	K10865+K03165+K03111+K10882+K10880+K10901+K10875+K02335+K10866+K10869+K10875+K03505+K10740+K03504+K10739+K07466+K07466+K07466+K10881+K03505+K03165+K02327+K10867+K11864+K20776+K02328+K10728
Selenocompound metabolism	9	27	0.177454	0.497642	ko00450	Unigene0008933;Unigene0018132;Unigene0024526;Unigene0024827;Unigene0031726;Unigene0033800;Unigene0034051;Unigene0035071;Unigene0038669	K01760+K08247+K01874+K01739+K13811+K11717+K00384+K01874+K01761
Caffeine metabolism	2	4	0.244245	0.655546	ko00232	Unigene0028211;Unigene0036150	K00365+K00106
Glycosphingolipid biosynthesis - ganglio series	2	4	0.244245	0.655546	ko00604	Unigene0020981;Unigene0025921	K12309+K12373
Pantothenate and CoA biosynthesis	11	37	0.257489	0.655546	ko00770	Unigene0000393;Unigene0001266;Unigene0002447;Unigene0003277;Unigene0006940;Unigene0007340;Unigene0008650;Unigene0009317;Unigene0029124;Unigene0035084;Unigene0040488	K09680+K00053+K06133+K01653+K01918+K01687+K00826+K00826+K01513+K01431+K01464
Fructose and mannose metabolism	23	84	0.2662	0.655546	ko00051	Unigene0003841;Unigene0005141;Unigene0010596;Unigene0011044;Unigene0018926;Unigene0019474;Unigene0020705;Unigene0020708;Unigene0020752;Unigene0023372;Unigene0028074;Unigene0028136;Unigene0029186;Unigene0033026;Unigene0033273;Unigene0033390;Unigene0033765;Unigene0036041;Unigene0037111;Unigene0037260;Unigene0038506;Unigene0039082;Unigene0040511	K01803+K00850+K00966+K18447+K03841+K00847+K19355+K19355+K03841+K00863+K00850+K01103+K00844+K01623+K00008+K00847+K00895+K03841+K01711+K01805+K05305+K19355+K00850
Tyrosine metabolism	16	57	0.276927	0.655546	ko00350	Unigene0009110;Unigene0009326;Unigene0010223;Unigene0011280;Unigene0015748;Unigene0018214;Unigene0018304;Unigene0020084;Unigene0024941;Unigene0028403;Unigene0031275;Unigene0031680;Unigene0037531;Unigene0037532;Unigene0037832;Unigene0037881	K00121+K00121+K14455+K00811+K00422+K14454+K00451+K00276+K00422+K00422+K00817+K00815+K00422+K00422+K00001+K01555
Autophagy - other eukaryotes	17	61	0.279222	0.655546	ko04136	Unigene0000388;Unigene0000447;Unigene0000508;Unigene0002476;Unigene0004479;Unigene0009124;Unigene0016765;Unigene0017900;Unigene0018948;Unigene0022346;Unigene0029732;Unigene0031784;Unigene0032384;Unigene0033226;Unigene0034985;Unigene0036051;Unigene0039119	K08333+K07204+K07203+K08269+K04382+K08334+K17606+K17890+K17888+K08266+K08341+K00914+K17906+K17907+K08337+K08331+K08330
Monobactam biosynthesis	5	15	0.279496	0.655546	ko00261	Unigene0009634;Unigene0023028;Unigene0027205;Unigene0031726;Unigene0039973	K12524+K00215+K01714+K13811+K00928
Glucosinolate biosynthesis	5	15	0.279496	0.655546	ko00966	Unigene0006381;Unigene0006949;Unigene0008650;Unigene0009317;Unigene0010424	K11820+K11820+K00826+K00826+K01703
Sulfur relay system	5	15	0.279496	0.655546	ko04122	Unigene0013397;Unigene0019906;Unigene0020597;Unigene0030292;Unigene0035069	K11996+K03637+K01011+K12161+K14168
Tropane, piperidine and pyridine alkaloid biosynthesis	7	23	0.303032	0.689651	ko00960	Unigene0006452;Unigene0010223;Unigene0011280;Unigene0018214;Unigene0020084;Unigene0031275;Unigene0031680	K08081+K14455+K00811+K14454+K00276+K00817+K00815
RNA polymerase	17	62	0.304729	0.689651	ko03020	Unigene0001741;Unigene0003275;Unigene0004017;Unigene0005656;Unigene0006072;Unigene0006101;Unigene0007460;Unigene0010714;Unigene0019277;Unigene0023128;Unigene0024938;Unigene0026192;Unigene0031335;Unigene0031701;Unigene0033227;Unigene0034822;Unigene0039059	K03023+K03013+K03024+K03025+K03012+K03019+K03015+K03006+K03010+K03002+K03021+K03017+K03016+K02999+K03026+K03020+K03005
Sulfur metabolism	11	41	0.390627	0.868809	ko00920	Unigene0011689;Unigene0020597;Unigene0024827;Unigene0025960;Unigene0029087;Unigene0031499;Unigene0031726;Unigene0032070;Unigene0032867;Unigene0032955;Unigene0036228	K13034+K01011+K01739+K05907+K15422+K00392+K13811+K00640+K00640+K01738+K00387
Carbon metabolism	98	400	0.416814	0.910805	ko01200	Unigene0000007;Unigene0000158;Unigene0000746;Unigene0001356;Unigene0001417;Unigene0002221;Unigene0002351;Unigene0002535;Unigene0003289;Unigene0003328;Unigene0003427;Unigene0003605;Unigene0003841;Unigene0004555;Unigene0004854;Unigene0005141;Unigene0006683;Unigene0007735;Unigene0008080;Unigene0008502;Unigene0009110;Unigene0009240;Unigene0009326;Unigene0010014;Unigene0010223;Unigene0010961;Unigene00…	K00281+K01689+K00873+K01057+K00830+K01834+K00600+K00873+K00627+K01647+K00161+K01834+K01803+K00605+K01810+K00850+K00831+K05605+K00026+K00873+K00121+K00927+K00121+K00026+K14455+K01783+K00616+K13034+K05605+K00028+K00234+K00051+K01595+K19269+K01006+K00616+K00162+K00615+K00873+K14454+K03841+K00036+K03841+K00033+K00030+K00873+K00863+K15918+K01679+K00873+K01647+K01754+K01689+K00850+K00814+K00844+K00658+…
Glycine, serine and threonine metabolism	23	91	0.42363	0.910805	ko00260	Unigene0000007;Unigene0001398;Unigene0001417;Unigene0002221;Unigene0002351;Unigene0003605;Unigene0004555;Unigene0004647;Unigene0006683;Unigene0009634;Unigene0013301;Unigene0020084;Unigene0022256;Unigene0024039;Unigene0025961;Unigene0031994;Unigene0032462;Unigene0032538;Unigene0033976;Unigene0035540;Unigene0037710;Unigene0038413;Unigene0039973	K00281+K01696+K00830+K01834+K00600+K01834+K00605+K01695+K00831+K12524+K00130+K00276+K00827+K15918+K01754+K00382+K02437+K01733+K15919+K01733+K14272+K01620+K00928
Arachidonic acid metabolism	6	22	0.43738	0.92495	ko00590	Unigene0010301;Unigene0013508;Unigene0015570;Unigene0020324;Unigene0026359;Unigene0036723	K00432+K05309+K14674+K00079+K15730+K01254
Fatty acid biosynthesis	13	51	0.452042	0.940539	ko00061	Unigene0000883;Unigene0004526;Unigene0011239;Unigene0014201;Unigene0020934;Unigene0028148;Unigene0031301;Unigene0032341;Unigene0032496;Unigene0033127;Unigene0033633;Unigene0034848;Unigene0036373	K11262+K03921+K10781+K00648+K01897+K09458+K00645+K01962+K01897+K01897+K00208+K01962+K01961
Histidine metabolism	10	39	0.46369	0.94946	ko00340	Unigene0001457;Unigene0001775;Unigene0006400;Unigene0012851;Unigene0031275;Unigene0032174;Unigene0034441;Unigene0035715;Unigene0038043;Unigene0038545	K01663+K00128+K11755+K00765+K00817+K01814+K01590+K00128+K01693+K18649
Glycerolipid metabolism	29	118	0.472942	0.953274	ko00561	Unigene0001775;Unigene0003396;Unigene0006113;Unigene0010889;Unigene0013507;Unigene0014690;Unigene0015570;Unigene0018107;Unigene0019624;Unigene0020665;Unigene0020774;Unigene0022006;Unigene0022509;Unigene0023165;Unigene0023372;Unigene0023877;Unigene0024039;Unigene0024561;Unigene0024924;Unigene0028887;Unigene0030198;Unigene0030861;Unigene0033520;Unigene0034452;Unigene0035058;Unigene0035426;Unigene00…	K00128+K13519+K01054+K06119+K01054+K03715+K14674+K00679+K00630+K09480+K01054+K13508+K07407+K00864+K00863+K01054+K15918+K13523+K21362+K15728+K06118+K00901+K00002+K18693+K00655+K22848+K09480+K00128+K13513
beta-Alanine metabolism	17	69	0.493899	0.980201	ko00410	Unigene0001775;Unigene0002484;Unigene0006940;Unigene0007735;Unigene0009984;Unigene0011818;Unigene0013039;Unigene0020084;Unigene0021298;Unigene0026466;Unigene0031326;Unigene0035084;Unigene0035684;Unigene0035715;Unigene0036712;Unigene0036964;Unigene0040488	K00128+K17839+K01918+K05605+K01580+K05605+K13366+K00276+K00797+K01578+K00140+K01431+K00797+K00128+K00249+K00140+K01464
Butanoate metabolism	6	24	0.530873	0.990682	ko00650	Unigene0003277;Unigene0009984;Unigene0021064;Unigene0036190;Unigene0036473;Unigene0040642	K01653+K01580+K00074+K18121+K01641+K18121
Riboflavin metabolism	6	24	0.530873	0.990682	ko00740	Unigene0003878;Unigene0005787;Unigene0015655;Unigene0028282;Unigene0029124;Unigene0035856	K11752+K11752+K14379+K00794+K01513+K18453
Nitrogen metabolism	9	37	0.54277	0.990682	ko00910	Unigene0000868;Unigene0001875;Unigene0018369;Unigene0024071;Unigene0031974;Unigene0033956;Unigene0035293;Unigene0038593;Unigene0039992	K00264+K02575+K01673+K00262+K01673+K00284+K01673+K00366+K01915
Ubiquinone and other terpenoid-quinone biosynthesis	13	54	0.544902	0.990682	ko00130	Unigene0000041;Unigene0008007;Unigene0015138;Unigene0031680;Unigene0032303;Unigene0034110;Unigene0034350;Unigene0034748;Unigene0035903;Unigene0037496;Unigene0037504;Unigene0039677;Unigene0040873	K00487+K05928+K03809+K00815+K00591+K01904+K01904+K14760+K03809+K06126+K01904+K12502+K06127
Flavone and flavonol biosynthesis	1	3	0.560381	0.990682	ko00944	Unigene0014848	K05280
Other glycan degradation	7	29	0.562639	0.990682	ko00511	Unigene0000864;Unigene0001523;Unigene0009981;Unigene0020981;Unigene0025921;Unigene0025931;Unigene0028737	K01190+K17108+K01227+K12309+K12373+K01206+K01444
Glycerophospholipid metabolism	27	114	0.564302	0.990682	ko00564	Unigene0000109;Unigene0003156;Unigene0003363;Unigene0003396;Unigene0005296;Unigene0008295;Unigene0013069;Unigene0015046;Unigene0015570;Unigene0018438;Unigene0019624;Unigene0020300;Unigene0021668;Unigene0022006;Unigene0022251;Unigene0024561;Unigene0026901;Unigene0028887;Unigene0029182;Unigene0030861;Unigene0032009;Unigene0033603;Unigene0034452;Unigene0035058;Unigene0035776;Unigene0035795;Unigene00…	K00993+K00968+K01613+K13519+K05929+K06130+K01114+K00550+K14674+K22389+K00630+K00981+K01517+K13508+K00981+K13523+K00995+K15728+K08730+K00901+K01613+K01115+K18693+K00655+K00967+K01114+K13513
Inositol phosphate metabolism	22	93	0.567939	0.990682	ko00562	Unigene0000147;Unigene0000301;Unigene0000863;Unigene0003041;Unigene0003841;Unigene0004295;Unigene0009347;Unigene0011201;Unigene0013069;Unigene0018435;Unigene0019744;Unigene0029087;Unigene0029403;Unigene0031326;Unigene0031784;Unigene0032397;Unigene0033644;Unigene0035518;Unigene0035795;Unigene0036964;Unigene0038170;Unigene0038545	K00921+K20279+K00888+K03103+K01803+K01858+K05857+K00915+K01114+K00913+K01765+K15422+K19801+K00140+K00914+K10572+K01092+K00889+K01114+K00140+K00913+K18649
Fatty acid metabolism	21	89	0.573525	0.990682	ko01212	Unigene0000883;Unigene0004526;Unigene0005489;Unigene0010068;Unigene0011239;Unigene0014201;Unigene0020934;Unigene0021036;Unigene0028148;Unigene0028249;Unigene0031301;Unigene0032341;Unigene0032496;Unigene0033127;Unigene0033633;Unigene0034848;Unigene0034864;Unigene0035219;Unigene0035593;Unigene0036373;Unigene0036712	K11262+K03921+K00232+K00232+K10781+K00648+K01897+K10251+K09458+K07512+K00645+K01962+K01897+K01897+K00208+K01962+K10527+K00232+K00232+K01961+K00249
Carotenoid biosynthesis	9	38	0.578545	0.990682	ko00906	Unigene0003168;Unigene0005735;Unigene0007932;Unigene0017916;Unigene0019493;Unigene0020136;Unigene0032880;Unigene0036910;Unigene0037571	K09841+K09843+K09840+K06444+K09837+K06443+K02293+K00514+K09835
Circadian rhythm - plant	11	47	0.591949	0.990682	ko04712	Unigene0003380;Unigene0006974;Unigene0011183;Unigene0011964;Unigene0015779;Unigene0032125;Unigene0032273;Unigene0035722;Unigene0035748;Unigene0035843;Unigene0040788	K12118+K12129+K03097+K12127+K16240+K10143+K12115+K16221+K12130+K12119+K12124
Protein processing in endoplasmic reticulum	72	306	0.594422	0.990682	ko04141	Unigene0000339;Unigene0000439;Unigene0000478;Unigene0001442;Unigene0003428;Unigene0003590;Unigene0003795;Unigene0004830;Unigene0005745;Unigene0006181;Unigene0006183;Unigene0006768;Unigene0008628;Unigene0010130;Unigene0010802;Unigene0012511;Unigene0012685;Unigene0015022;Unigene0015229;Unigene0015365;Unigene0015569;Unigene0016073;Unigene0017458;Unigene0017856;Unigene0018576;Unigene0018958;Unigene00…	K14005+K03283+K11718+K13993+K13719+K08653+K14018+K12666+K09487+K03283+K03283+K09580+K03283+K10666+K10601+K01230+K09518+K09562+K13989+K08057+K07151+K10666+K06689+K12670+K10839+K14016+K14016+K08852+K10956+K14007+K10085+K09481+K13249+K13993+K09503+K08288+K09486+K08054+K12275+K12667+K03094+K13993+K09584+K09523+K09517+K01456+K10575+K10839+K04523+K10636+K10597+K14006+K03094+K03094+K09580+K13993+K13989+…
Valine, leucine and isoleucine degradation	17	73	0.599017	0.990682	ko00280	Unigene0001775;Unigene0003786;Unigene0004373;Unigene0007735;Unigene0008650;Unigene0009317;Unigene0011818;Unigene0022256;Unigene0026050;Unigene0031326;Unigene0031994;Unigene0033760;Unigene0035715;Unigene0036437;Unigene0036473;Unigene0036712;Unigene0036964	K00128+K01969+K00167+K05605+K00826+K00826+K05605+K00827+K05607+K00140+K00382+K01968+K00128+K09699+K01641+K00249+K00140
Biotin metabolism	5	22	0.635251	1	ko00780	Unigene0013882;Unigene0028148;Unigene0030558;Unigene0033633;Unigene0037873	K19562+K09458+K01012+K00208+K00652
Pyruvate metabolism	35	152	0.638647	1	ko00620	Unigene0000746;Unigene0000883;Unigene0001775;Unigene0002535;Unigene0003289;Unigene0003427;Unigene0005158;Unigene0008080;Unigene0008502;Unigene0010014;Unigene0011928;Unigene0012700;Unigene0012717;Unigene0013403;Unigene0014169;Unigene0017310;Unigene0018205;Unigene0021603;Unigene0024220;Unigene0024540;Unigene0029401;Unigene0031456;Unigene0031806;Unigene0031994;Unigene0032341;Unigene0033845;Unigene00…	K00873+K11262+K00128+K00873+K00627+K00161+K18881+K00026+K00873+K00026+K00028+K00051+K01595+K01006+K00162+K00873+K01649+K00873+K01679+K00873+K01512+K00029+K01913+K00382+K01962+K01895+K00028+K01962+K00128+K01961+K00627+K00016+K00026+K00162+K00102
Glycolysis / Gluconeogenesis	49	212	0.641967	1	ko00010	Unigene0000158;Unigene0000746;Unigene0001775;Unigene0002221;Unigene0002535;Unigene0002569;Unigene0003041;Unigene0003289;Unigene0003427;Unigene0003605;Unigene0003841;Unigene0004854;Unigene0005141;Unigene0008502;Unigene0009110;Unigene0009240;Unigene0009326;Unigene0014169;Unigene0016366;Unigene0017310;Unigene0018732;Unigene0018926;Unigene0020752;Unigene0021603;Unigene0023567;Unigene0024540;Unigene00…	K01689+K00873+K00128+K01834+K00873+K01568+K03103+K00627+K00161+K01834+K01803+K01810+K00850+K00873+K00121+K00927+K00121+K00162+K01568+K00873+K01792+K03841+K03841+K00873+K01792+K00873+K01689+K00850+K00844+K01835+K00134+K01913+K00382+K01623+K00002+K00895+K01895+K00131+K00128+K03841+K00627+K00016+K00001+K01785+K01792+K01689+K01835+K00162+K00850
Fatty acid degradation	16	71	0.656231	1	ko00071	Unigene0001775;Unigene0005489;Unigene0009110;Unigene0009326;Unigene0010068;Unigene0020934;Unigene0029293;Unigene0032496;Unigene0033127;Unigene0034864;Unigene0035219;Unigene0035593;Unigene0035715;Unigene0036712;Unigene0037832;Unigene0038246	K00128+K00232+K00121+K00121+K00232+K01897+K07517+K01897+K01897+K10527+K00232+K00232+K00128+K00249+K00001+K07517
Indole alkaloid biosynthesis	1	4	0.66576	1	ko00901	Unigene0019463	K21026
Brassinosteroid biosynthesis	5	23	0.677044	1	ko00905	Unigene0010217;Unigene0014331;Unigene0022552;Unigene0038087;Unigene0040920	K09590+K09591+K20623+K12637+K09587
Ether lipid metabolism	6	28	0.693762	1	ko00565	Unigene0000109;Unigene0003396;Unigene0013069;Unigene0015570;Unigene0033603;Unigene0035795	K00993+K13519+K01114+K14674+K01115+K01114
Ubiquitin mediated proteolysis	39	173	0.699071	1	ko04120	Unigene0002061;Unigene0002163;Unigene0003948;Unigene0006737;Unigene0008241;Unigene0009409;Unigene0009486;Unigene0010361;Unigene0010802;Unigene0012399;Unigene0014576;Unigene0015837;Unigene0017458;Unigene0017473;Unigene0017621;Unigene0018380;Unigene0019786;Unigene0024848;Unigene0025245;Unigene0025963;Unigene0028608;Unigene0031555;Unigene0032125;Unigene0032223;Unigene0032245;Unigene0032275;Unigene00…	K10144+K10604+K10580+K10144+K10589+K10685+K03364+K10686+K10601+K03355+K04506+K03351+K06689+K03363+K04506+K03353+K10598+K10581+K03349+K03094+K03354+K10575+K10143+K10599+K10610+K10588+K10590+K10609+K10597+K03094+K03094+K03357+K03350+K10604+K03354+K10573+K06688+K04506+K20217
SNARE interactions in vesicular transport	9	42	0.706875	1	ko04130	Unigene0005393;Unigene0006506;Unigene0011369;Unigene0012664;Unigene0019887;Unigene0026588;Unigene0031350;Unigene0031897;Unigene0034448	K08490+K08515+K08503+K08517+K08488+K08490+K08486+K08495+K08515
Photosynthesis	15	69	0.712024	1	ko00195	Unigene0005449;Unigene0007933;Unigene0011457;Unigene0013372;Unigene0014274;Unigene0016638;Unigene0019625;Unigene0029377;Unigene0034238;Unigene0034908;Unigene0034917;Unigene0036682;Unigene0038030;Unigene0039270;Unigene0039347	K02695+K02639+K02109+K02639+K08901+K02705+K02639+K02703+K02115+K02111+K02115+K08906+K02635+K08901+K02694
Glycosphingolipid biosynthesis - globo and isoglobo series	2	10	0.731929	1	ko00603	Unigene0022509;Unigene0025921	K07407+K12373
Synthesis and degradation of ketone bodies	1	5	0.745891	1	ko00072	Unigene0036473	K01641
Lipoic acid metabolism	1	5	0.745891	1	ko00785	Unigene0037561	K03644
Citrate cycle (TCA cycle)	20	93	0.748362	1	ko00020	Unigene0003289;Unigene0003328;Unigene0003427;Unigene0008080;Unigene0010014;Unigene0010990;Unigene0012002;Unigene0014169;Unigene0021485;Unigene0024220;Unigene0024785;Unigene0029584;Unigene0031489;Unigene0031501;Unigene0031961;Unigene0031994;Unigene0033280;Unigene0036498;Unigene0039785;Unigene0040001	K00627+K01647+K00161+K00026+K00026+K01648+K00234+K00162+K00030+K01679+K01647+K00658+K01900+K00031+K00031+K00382+K01899+K00627+K00026+K00162
Pentose and glucuronate interconversions	15	72	0.774442	1	ko00040	Unigene0001243;Unigene0002425;Unigene0003109;Unigene0003888;Unigene0004206;Unigene0009278;Unigene0010061;Unigene0010961;Unigene0020737;Unigene0023638;Unigene0033273;Unigene0033520;Unigene0033635;Unigene0034937;Unigene0037260	K12447+K01051+K00012+K01213+K16190+K01051+K00963+K01783+K01051+K01051+K00008+K00002+K01728+K00963+K01805
Photosynthesis - antenna proteins	4	21	0.777851	1	ko00196	Unigene0000124;Unigene0019711;Unigene0031274;Unigene0036006	K08908+K08912+K14172+K08908
Peroxisome	29	135	0.781403	1	ko04146	Unigene0001417;Unigene0004038;Unigene0004801;Unigene0005489;Unigene0005542;Unigene0009213;Unigene0009781;Unigene0010068;Unigene0011622;Unigene0020934;Unigene0021193;Unigene0021994;Unigene0023368;Unigene0026466;Unigene0027037;Unigene0027598;Unigene0031493;Unigene0031501;Unigene0031961;Unigene0032496;Unigene0033127;Unigene0035219;Unigene0035398;Unigene0035593;Unigene0035726;Unigene0036150;Unigene00…	K00830+K13348+K12663+K00232+K13337+K06664+K17879+K00232+K13341+K01897+K04564+K13347+K13346+K01578+K12261+K00477+K13336+K00031+K00031+K01897+K01897+K00232+K13338+K00232+K13348+K00106+K13344+K13348+K13339
Carbon fixation in photosynthetic organisms	24	114	0.799264	1	ko00710	Unigene0003841;Unigene0008080;Unigene0009240;Unigene0010014;Unigene0010223;Unigene0010961;Unigene0011928;Unigene0012700;Unigene0012717;Unigene0013403;Unigene0015483;Unigene0018214;Unigene0018926;Unigene0020752;Unigene0028292;Unigene0030799;Unigene0031456;Unigene0031487;Unigene0033026;Unigene0034178;Unigene0036041;Unigene0036534;Unigene0037710;Unigene0039785	K01803+K00026+K00927+K00026+K14455+K01783+K00028+K00051+K01595+K01006+K00615+K14454+K03841+K03841+K00814+K01807+K00029+K00134+K01623+K00028+K03841+K01601+K14272+K00026
Arginine and proline metabolism	18	87	0.799461	1	ko00330	Unigene0001775;Unigene0002484;Unigene0008825;Unigene0010223;Unigene0011280;Unigene0012720;Unigene0013039;Unigene0014914;Unigene0017220;Unigene0018214;Unigene0021290;Unigene0021298;Unigene0028152;Unigene0035684;Unigene0035715;Unigene0038551;Unigene0039581;Unigene0039906	K00128+K17839+K01259+K14455+K00811+K00472+K13366+K13427+K00286+K14454+K00294+K00797+K10536+K00797+K00128+K00286+K00472+K00472
Other types of O-glycan biosynthesis	4	22	0.80954	1	ko00514	Unigene0002683;Unigene0011252;Unigene0011427;Unigene0027617	K20782+K20784+K09667+K09667
Starch and sucrose metabolism	35	165	0.823326	1	ko00500	Unigene0004854;Unigene0005701;Unigene0010061;Unigene0011002;Unigene0011044;Unigene0011869;Unigene0012489;Unigene0016144;Unigene0016999;Unigene0017982;Unigene0018037;Unigene0019474;Unigene0022007;Unigene0022948;Unigene0025969;Unigene0029124;Unigene0029186;Unigene0029324;Unigene0031103;Unigene0031517;Unigene0031704;Unigene0031904;Unigene0032058;Unigene0032098;Unigene0033390;Unigene0034329;Unigene00…	K01810+K01214+K00963+K01188+K18447+K00700+K01188+K01176+K01187+K00688+K01194+K00847+K01193+K19893+K00703+K01513+K00844+K01835+K05350+K05349+K00705+K00703+K00975+K01188+K00847+K05349+K00963+K00705+K13679+K00700+K00975+K01835+K01214+K05349+K00700
Phosphatidylinositol signaling system	20	99	0.84182	1	ko04070	Unigene0000147;Unigene0000301;Unigene0000863;Unigene0009347;Unigene0011201;Unigene0018435;Unigene0020300;Unigene0022095;Unigene0022251;Unigene0029087;Unigene0029403;Unigene0030861;Unigene0031784;Unigene0032397;Unigene0033644;Unigene0034195;Unigene0035518;Unigene0037957;Unigene0038170;Unigene0038545	K00921+K20279+K00888+K05857+K00915+K00913+K00981+K02183+K00981+K15422+K19801+K00901+K00914+K10572+K01092+K02183+K00889+K13024+K00913+K18649
Phenylalanine metabolism	12	62	0.842323	1	ko00360	Unigene0000041;Unigene0010223;Unigene0011280;Unigene0018214;Unigene0020084;Unigene0021064;Unigene0031275;Unigene0031680;Unigene0033789;Unigene0034110;Unigene0034350;Unigene0037504	K00487+K14455+K00811+K14454+K00276+K00074+K00817+K00815+K00588+K01904+K01904+K01904
Endocytosis	49	229	0.842359	1	ko04144	Unigene0000439;Unigene0003800;Unigene0004204;Unigene0005665;Unigene0006181;Unigene0006183;Unigene0007084;Unigene0008628;Unigene0009076;Unigene0009620;Unigene0010800;Unigene0011256;Unigene0013004;Unigene0014648;Unigene0015302;Unigene0015691;Unigene0016659;Unigene0017892;Unigene0018047;Unigene0020138;Unigene0020238;Unigene0020502;Unigene0022119;Unigene0023695;Unigene0025381;Unigene0028076;Unigene00…	K03283+K10396+K12196+K10365+K03283+K03283+K07904+K03283+K12198+K12489+K11826+K19476+K05758+K19476+K05755+K07904+K12190+K11824+K07904+K10364+K12193+K15053+K11866+K12200+K12189+K12195+K12479+K07904+K12191+K11827+K12489+K19476+K19366+K01528+K07937+K01115+K12471+K05757+K12185+K12486+K00889+K12486+K07904+K12471+K18466+K12486+K12197+K19366+K05756
Steroid biosynthesis	8	43	0.842821	1	ko00100	Unigene0002568;Unigene0014681;Unigene0015570;Unigene0016939;Unigene0026053;Unigene0034558;Unigene0036648;Unigene0036786	K01824+K07748+K14674+K00801+K09828+K00227+K08246+K00222
alpha-Linolenic acid metabolism	10	53	0.850074	1	ko00592	Unigene0005489;Unigene0010068;Unigene0011667;Unigene0015570;Unigene0018438;Unigene0025925;Unigene0029682;Unigene0034864;Unigene0035219;Unigene0035593	K00232+K00232+K00454+K14674+K22389+K10528+K10526+K10527+K00232+K00232
Flavonoid biosynthesis	10	55	0.880888	1	ko00941	Unigene0000041;Unigene0014848;Unigene0016112;Unigene0016145;Unigene0021434;Unigene0027069;Unigene0027135;Unigene0033789;Unigene0035224;Unigene0038464	K00487+K05280+K01859+K00475+K08695+K13065+K05278+K00588+K13082+K13065
Diterpenoid biosynthesis	3	21	0.909937	1	ko00904	Unigene0003591;Unigene0015166;Unigene0035817	K04123+K04122+K17961
Lysine degradation	14	77	0.911588	1	ko00310	Unigene0000008;Unigene0000014;Unigene0000805;Unigene0001775;Unigene0015793;Unigene0015807;Unigene0023063;Unigene0029584;Unigene0035715;Unigene0036326;Unigene0037377;Unigene0039324;Unigene0039395;Unigene0039953	K11423+K11423+K22748+K00128+K14157+K19199+K11420+K00658+K00128+K11430+K18826+K11430+K11423+K19199
Stilbenoid, diarylheptanoid and gingerol biosynthesis	4	27	0.91702	1	ko00945	Unigene0000041;Unigene0027069;Unigene0033789;Unigene0038464	K00487+K13065+K00588+K13065
Glutathione metabolism	20	107	0.922711	1	ko00480	Unigene0005993;Unigene0009773;Unigene0010301;Unigene0011885;Unigene0020153;Unigene0021096;Unigene0021298;Unigene0026231;Unigene0028300;Unigene0030085;Unigene0031501;Unigene0031961;Unigene0032594;Unigene0034439;Unigene0034608;Unigene0035073;Unigene0035684;Unigene0035943;Unigene0038073;Unigene0040630	K21456+K00799+K00432+K01469+K00036+K00033+K00797+K01255+K10808+K00799+K00031+K00031+K00033+K00434+K01919+K00036+K00797+K00799+K10807+K01256
Glyoxylate and dicarboxylate metabolism	24	129	0.942005	1	ko00630	Unigene0000007;Unigene0001417;Unigene0002351;Unigene0003328;Unigene0004555;Unigene0008080;Unigene0010014;Unigene0013291;Unigene0024039;Unigene0024785;Unigene0031806;Unigene0031994;Unigene0032462;Unigene0033845;Unigene0033956;Unigene0033976;Unigene0035842;Unigene0036190;Unigene0036534;Unigene0037602;Unigene0037710;Unigene0039785;Unigene0039992;Unigene0040642	K00281+K00830+K00600+K01647+K00605+K00026+K00026+K19269+K15918+K01647+K01913+K00382+K02437+K01895+K00284+K15919+K01433+K18121+K01601+K19269+K14272+K00026+K01915+K18121
Ascorbate and aldarate metabolism	11	67	0.950082	1	ko00053	Unigene0001243;Unigene0001775;Unigene0003109;Unigene0004206;Unigene0027458;Unigene0033886;Unigene0034439;Unigene0035715;Unigene0038545;Unigene0039245;Unigene0040358	K12447+K00128+K00012+K16190+K08232+K08232+K00434+K00128+K18649+K14190+K00225
Sesquiterpenoid and triterpenoid biosynthesis	2	18	0.952019	1	ko00909	Unigene0015121;Unigene0016939	K15891+K00801
Biosynthesis of unsaturated fatty acids	6	42	0.958068	1	ko01040	Unigene0004526;Unigene0005489;Unigene0010068;Unigene0021036;Unigene0035219;Unigene0035593	K03921+K00232+K00232+K10251+K00232+K00232
Fatty acid elongation	5	37	0.961793	1	ko00062	Unigene0010623;Unigene0016537;Unigene0021036;Unigene0028249;Unigene0033452	K15397+K15397+K10251+K07512+K01076
Zeatin biosynthesis	2	19	0.961818	1	ko00908	Unigene0009346;Unigene0026315	K00791+K10760
Taurine and hypotaurine metabolism	1	12	0.962749	1	ko00430	Unigene0009984	K01580
Cyanoamino acid metabolism	9	59	0.963637	1	ko00460	Unigene0002351;Unigene0011002;Unigene0011689;Unigene0012489;Unigene0031103;Unigene0031517;Unigene0032098;Unigene0034329;Unigene0040180	K00600+K01188+K13034+K01188+K05350+K05349+K01188+K05349+K05349
ABC transporters	6	45	0.974561	1	ko02010	Unigene0000860;Unigene0013173;Unigene0018809;Unigene0019507;Unigene0032148;Unigene0032542	K05658+K05663+K05674+K05655+K05656+K05643
Monoterpenoid biosynthesis	1	14	0.978487	1	ko00902	Unigene0009310	K15095
Plant-pathogen interaction	69	365	0.992772	1	ko04626	Unigene0000829;Unigene0000867;Unigene0000909;Unigene0001618;Unigene0001644;Unigene0002466;Unigene0002524;Unigene0004227;Unigene0005590;Unigene0005745;Unigene0006656;Unigene0006927;Unigene0007106;Unigene0007408;Unigene0007543;Unigene0008380;Unigene0008953;Unigene0008957;Unigene0009878;Unigene0010623;Unigene0011823;Unigene0014914;Unigene0015044;Unigene0015156;Unigene0016537;Unigene0017518;Unigene00…	K13420+K09422+K13412+K13448+K13459+K13457+K09422+K13412+K09422+K09487+K09422+K02358+K13457+K09422+K05391+K09422+K09422+K09422+K05391+K15397+K13448+K13427+K20536+K09422+K15397+K13434+K13434+K09422+K13448+K09422+K02358+K09422+K09422+K13459+K02183+K09422+K00864+K13412+K12795+K13448+K13448+K09422+K09422+K13448+K13449+K13412+K13448+K13412+K13414+K13448+K13414+K02183+K05391+K13412+K09422+K13457+K09487+…
Phagosome	19	125	0.99433	1	ko04145	Unigene0000147;Unigene0006413;Unigene0012664;Unigene0015365;Unigene0016955;Unigene0018516;Unigene0019560;Unigene0019588;Unigene0019887;Unigene0020282;Unigene0020544;Unigene0024994;Unigene0031784;Unigene0033171;Unigene0033736;Unigene0035851;Unigene0035939;Unigene0036157;Unigene0039839	K00921+K02147+K08517+K08057+K02152+K07374+K02146+K10956+K08488+K02148+K09481+K08054+K00914+K02151+K07375+K02145+K08057+K02149+K02144
Plant hormone signal transduction	45	258	0.996064	1	ko04075	Unigene0000246;Unigene0000476;Unigene0001646;Unigene0001956;Unigene0002593;Unigene0004506;Unigene0004567;Unigene0005274;Unigene0007193;Unigene0010821;Unigene0013011;Unigene0013228;Unigene0015593;Unigene0015726;Unigene0016401;Unigene0016960;Unigene0017156;Unigene0017879;Unigene0020987;Unigene0021058;Unigene0022008;Unigene0025232;Unigene0025759;Unigene0026284;Unigene0026475;Unigene0027233;Unigene00…	K14486+K14514+K13415+K14491+K13464+K14487+K14496+K14516+K14431+K14432+K13464+K14488+K13946+K14484+K14486+K14431+K13464+K14494+K14488+K14509+K14489+K14484+K14432+K13449+K14491+K14488+K14493+K14488+K14488+K14488+K14503+K14432+K14498+K14514+K14506+K14508+K13464+K14484+K14486+K14488+K14510+K14485+K13422+K14491+K14497
Phenylpropanoid biosynthesis	21	142	0.997599	1	ko00940	Unigene0000041;Unigene0003804;Unigene0011002;Unigene0012489;Unigene0020029;Unigene0023305;Unigene0026204;Unigene0027069;Unigene0027220;Unigene0028050;Unigene0031103;Unigene0031517;Unigene0032098;Unigene0033789;Unigene0034110;Unigene0034329;Unigene0034350;Unigene0036631;Unigene0037504;Unigene0038464;Unigene0040180	K00487+K18368+K01188+K01188+K00430+K22395+K00430+K13065+K12356+K00083+K05350+K05349+K01188+K00588+K01904+K05349+K01904+K00430+K01904+K13065+K05349
Linoleic acid metabolism	2	31	0.997827	1	ko00591	Unigene0011667;Unigene0015570	K00454+K14674
Cutin, suberine and wax biosynthesis	1	23	0.998186	1	ko00073	Unigene0033469	K17991
MAPK signaling pathway - plant	30	197	0.999155	1	ko04016	Unigene0000476;Unigene0000829;Unigene0002527;Unigene0004567;Unigene0005274;Unigene0010531;Unigene0014192;Unigene0015044;Unigene0021058;Unigene0022095;Unigene0022569;Unigene0023317;Unigene0026284;Unigene0027825;Unigene0028478;Unigene0029111;Unigene0029245;Unigene0029798;Unigene0031573;Unigene0031930;Unigene0032579;Unigene0032773;Unigene0034195;Unigene0034856;Unigene0036331;Unigene0036351;Unigene00…	K14514+K13420+K20726+K14496+K14516+K20725+K17686+K20536+K14509+K02183+K20538+K20714+K13449+K20553+K20718+K20725+K13414+K17686+K13414+K14498+K20717+K14514+K02183+K20717+K20726+K13424+K14510+K13422+K14497+K20606
Oxidative phosphorylation	35	238	0.999875	1	ko00190	Unigene0000865;Unigene0001200;Unigene0001732;Unigene0003239;Unigene0003818;Unigene0004805;Unigene0006413;Unigene0007281;Unigene0011457;Unigene0011757;Unigene0012002;Unigene0012100;Unigene0013308;Unigene0014812;Unigene0014917;Unigene0016955;Unigene0019560;Unigene0020282;Unigene0020994;Unigene0021862;Unigene0023827;Unigene0024018;Unigene0024608;Unigene0033171;Unigene0034238;Unigene0034339;Unigene00…	K03934+K00416+K03946+K02258+K03949+K03940+K02147+K02138+K02109+K00411+K00234+K03942+K03939+K02266+K00413+K02152+K02146+K02148+K03955+K02135+K02132+K00411+K01507+K02151+K02115+K02259+K02111+K02115+K03953+K02145+K02149+K03941+K05582+K02144+K02256
Tryptophan metabolism	6	85	0.999991	1	ko00380	Unigene0001775;Unigene0006381;Unigene0006949;Unigene0030294;Unigene0031875;Unigene0035715	K00128+K11820+K11820+K22450+K22450+K00128
Ribosome	58	636	1	1	ko03010	Unigene0001101;Unigene0001246;Unigene0001677;Unigene0001837;Unigene0001838;Unigene0002557;Unigene0003058;Unigene0003651;Unigene0004747;Unigene0005405;Unigene0007365;Unigene0007624;Unigene0008751;Unigene0009152;Unigene0010859;Unigene0011250;Unigene0012114;Unigene0012440;Unigene0014068;Unigene0015683;Unigene0016511;Unigene0017323;Unigene0019763;Unigene0019764;Unigene0019910;Unigene0020240;Unigene00…	K02906+K02910+K02948+K02881+K02881+K02922+K02863+K02985+K02864+K02868+K02871+K02883+K02952+K02892+K02987+K02949+K02881+K02995+K02934+K02903+K02990+K02908+K02930+K02930+K02906+K02899+K02950+K02976+K02935+K02939+K02942+K02867+K02925+K02935+K02887+K02989+K02921+K02897+K02988+K02896+K02974+K02902+K02946+K02872+K02941+K02937+K02984+K02936+K02904+K02935+K02896+K02882+K02981+K02911+K02940+K02975+K02923+…

## Sheet: MYXZ
KEGG analysis result for single-copy genes in Chaenomeles thibetica(MYXZ)
Pathway	out (1525)	All (7938)	Pvalue	Qvalue	Pathway ID	Genes	K_IDs
Non-homologous end-joining	8	8	1.82817e-06	0.000235833	ko03450	Unigene0011370;Unigene0024436;Unigene0028278;Unigene0038928;Unigene0044348;Unigene0044503;Unigene0044775;Unigene0049555	K03512+K10885+K10886+K10866+K10865+K04799+K10884+K10777
Base excision repair	24	52	8.67023e-06	0.00055923	ko03410	Unigene0001537;Unigene0002015;Unigene0004223;Unigene0004965;Unigene0009038;Unigene0010484;Unigene0011370;Unigene0018485;Unigene0024720;Unigene0029171;Unigene0030324;Unigene0030677;Unigene0034393;Unigene0035040;Unigene0038521;Unigene0039345;Unigene0039437;Unigene0041457;Unigene0044156;Unigene0044503;Unigene0045658;Unigene0046760;Unigene0047090;Unigene0047362	K01247+K01246+K02335+K10801+K02327+K03575+K03512+K10747+K03660+K10803+K03648+K01247+K10747+K03504+K03505+K03506+K01246+K03505+K02328+K04799+K01142+K02326+K10773+K04802
Ribosome biogenesis in eukaryotes	39	110	4.13006e-05	0.00140911	ko03008	Unigene0000102;Unigene0001109;Unigene0001972;Unigene0002972;Unigene0003635;Unigene0008093;Unigene0012997;Unigene0014010;Unigene0014366;Unigene0015995;Unigene0016056;Unigene0016610;Unigene0018596;Unigene0020386;Unigene0022011;Unigene0022114;Unigene0024007;Unigene0024307;Unigene0025261;Unigene0028321;Unigene0030102;Unigene0030130;Unigene0030160;Unigene0031415;Unigene0031695;Unigene0032107;Unigene00…	K14573+K14554+K14567+K14549+K14572+K01164+K03097+K14558+K14560+K14538+K14546+K06943+K07936+K03539+K14290+K14569+K03538+K14563+K11131+K14565+K03537+K14537+K14561+K11130+K14559+K14552+K14548+K14568+K11108+K14521+K14550+K14536+K07562+K12619+K14566+K06943+K14571+K14574+K14556
Nucleotide excision repair	36	99	4.36933e-05	0.00140911	ko03420	Unigene0002599;Unigene0003315;Unigene0004148;Unigene0004223;Unigene0005971;Unigene0006609;Unigene0006854;Unigene0009038;Unigene0009111;Unigene0013404;Unigene0015507;Unigene0016332;Unigene0018485;Unigene0020891;Unigene0021193;Unigene0025581;Unigene0026896;Unigene0029220;Unigene0034393;Unigene0034424;Unigene0035040;Unigene0035893;Unigene0037981;Unigene0038521;Unigene0039345;Unigene0039592;Unigene00…	K10844+K10754+K10755+K02335+K10610+K10843+K10848+K02327+K07466+K10839+K10840+K07466+K10747+K10755+K10609+K10846+K10838+K10839+K10747+K03141+K03504+K10740+K10739+K03505+K03506+K03143+K06634+K10841+K03505+K07466+K02328+K10756+K02326+K02202+K04802+K10755
Aminoacyl-tRNA biosynthesis	31	83	8.16386e-05	0.00201867	ko00970	Unigene0000023;Unigene0000392;Unigene0000630;Unigene0000712;Unigene0002249;Unigene0002758;Unigene0004811;Unigene0005670;Unigene0005763;Unigene0006717;Unigene0009466;Unigene0016047;Unigene0019567;Unigene0020137;Unigene0020220;Unigene0022360;Unigene0026560;Unigene0028372;Unigene0029108;Unigene0029958;Unigene0031541;Unigene0031881;Unigene0031989;Unigene0038657;Unigene0039364;Unigene0044384;Unigene00…	K01872+K01873+K01870+K01868+K01876+K01883+K01874+K01867+K01868+K01883+K01872+K01866+K01893+K01869+K01880+K01869+K14164+K01887+K01875+K01874+K01873+K01889+K04567+K02434+K00604+K01889+K01890+K01875+K01881+K01893+K01886
Spliceosome	88	317	0.000102962	0.00201867	ko03040	Unigene0000025;Unigene0000109;Unigene0000302;Unigene0000876;Unigene0001137;Unigene0001141;Unigene0002389;Unigene0002612;Unigene0002852;Unigene0004171;Unigene0005924;Unigene0006254;Unigene0006326;Unigene0006524;Unigene0007863;Unigene0009366;Unigene0009479;Unigene0009596;Unigene0010519;Unigene0010943;Unigene0011072;Unigene0011913;Unigene0012230;Unigene0013715;Unigene0014243;Unigene0014499;Unigene00…	K12812+K03283+K12818+K12818+K12855+K12867+K03283+K12741+K03283+K12876+K12875+K12821+K12879+K12893+K12829+K12850+K12662+K12860+K12880+K03283+K13025+K12842+K12882+K12870+K12823+K12828+K12900+K12897+K12896+K12890+K06063+K12893+K12831+K12839+K11097+K11088+K12819+K11094+K12823+K12858+K12831+K12843+K12837+K12818+K12822+K12627+K12878+K12741+K12836+K12821+K12812+K11087+K12837+K12877+K12852+K12836+K12623+…
N-Glycan biosynthesis	24	59	0.00010954	0.00201867	ko00510	Unigene0000964;Unigene0001960;Unigene0003554;Unigene0006149;Unigene0007639;Unigene0010239;Unigene0012167;Unigene0012323;Unigene0020214;Unigene0024146;Unigene0026166;Unigene0029606;Unigene0030833;Unigene0035162;Unigene0035527;Unigene0036263;Unigene0039031;Unigene0040028;Unigene0041480;Unigene0041751;Unigene0042406;Unigene0044178;Unigene0045999;Unigene0049150	K01231+K07432+K03847+K09658+K00726+K03843+K12667+K00902+K12670+K00729+K00737+K05546+K01230+K00737+K00721+K03842+K01228+K07151+K00737+K03849+K03846+K12666+K03850+K03849
Purine metabolism	74	259	0.000137101	0.00221076	ko00230	Unigene0000174;Unigene0000685;Unigene0000760;Unigene0001364;Unigene0001626;Unigene0001931;Unigene0003031;Unigene0003055;Unigene0003860;Unigene0004223;Unigene0005266;Unigene0005552;Unigene0005919;Unigene0007648;Unigene0008848;Unigene0008945;Unigene0008995;Unigene0009038;Unigene0010207;Unigene0011310;Unigene0011631;Unigene0012038;Unigene0014055;Unigene0015739;Unigene0016423;Unigene0017578;Unigene00…	K01427+K03006+K00873+K00939+K03026+K03019+K01510+K10807+K03025+K02335+K00106+K01945+K00939+K00873+K00873+K03013+K00951+K02327+K01951+K14641+K03017+K01514+K18447+K03021+K00873+K01939+K13811+K00962+K01835+K01513+K03023+K01756+K03015+K00948+K06928+K00951+K10808+K00764+K01488+K01490+K03016+K01517+K03002+K01952+K02999+K02083+K03504+K00365+K00962+K03505+K03506+K13484+K03505+K00939+K02328+K01835+K03010+…
Mismatch repair	25	66	0.000302446	0.00433506	ko03430	Unigene0003315;Unigene0004148;Unigene0006612;Unigene0009038;Unigene0009111;Unigene0012192;Unigene0015193;Unigene0016332;Unigene0018485;Unigene0020891;Unigene0028539;Unigene0034393;Unigene0035040;Unigene0035893;Unigene0037981;Unigene0038521;Unigene0039522;Unigene0041457;Unigene0042485;Unigene0042832;Unigene0044156;Unigene0046010;Unigene0047362;Unigene0049028;Unigene0049491	K10754+K10755+K08734+K02327+K07466+K03111+K10858+K07466+K10747+K10755+K07456+K10747+K03504+K10740+K10739+K03505+K08739+K03505+K08735+K07466+K02328+K10756+K04802+K08737+K10755
Glycosylphosphatidylinositol(GPI)-anchor biosynthesis	13	27	0.000622858	0.00803486	ko00563	Unigene0002204;Unigene0002543;Unigene0006149;Unigene0007135;Unigene0007347;Unigene0018070;Unigene0027053;Unigene0030860;Unigene0031215;Unigene0033253;Unigene0033743;Unigene0044520;Unigene0047208	K05284+K03857+K09658+K05292+K07541+K03434+K03859+K05291+K05290+K05286+K05310+K11001+K03861
Terpenoid backbone biosynthesis	22	60	0.00113743	0.013339	ko00900	Unigene0001132;Unigene0001961;Unigene0002292;Unigene0004491;Unigene0004493;Unigene0005025;Unigene0014977;Unigene0020602;Unigene0021876;Unigene0022532;Unigene0023525;Unigene0026153;Unigene0027377;Unigene0028017;Unigene0030650;Unigene0031089;Unigene0033431;Unigene0036562;Unigene0037810;Unigene0042752;Unigene0047002;Unigene0049027	K01662+K01662+K11778+K00021+K00021+K05356+K13789+K05955+K05906+K01823+K11778+K00099+K01641+K03526+K15891+K10960+K01597+K11778+K13789+K06013+K00991+K00919
mRNA surveillance pathway	48	165	0.00128958	0.013863	ko03015	Unigene0000025;Unigene0000093;Unigene0000121;Unigene0000202;Unigene0001496;Unigene0002417;Unigene0003633;Unigene0004171;Unigene0004629;Unigene0005924;Unigene0007313;Unigene0008189;Unigene0009578;Unigene0011072;Unigene0012230;Unigene0013097;Unigene0014297;Unigene0017881;Unigene0018731;Unigene0018913;Unigene0020700;Unigene0021288;Unigene0021571;Unigene0022258;Unigene0023071;Unigene0024486;Unigene00…	K12812+K14327+K14326+K14407+K11584+K14396+K11583+K12876+K14401+K12875+K13126+K14411+K14404+K13025+K12882+K13126+K14397+K03456+K13114+K14962+K04382+K14404+K14396+K06100+K14399+K14400+K14406+K12812+K12877+K00565+K00565+K14411+K14411+K06100+K14403+K06965+K14376+K03267+K13917+K14416+K14962+K11584+K13126+K14409+K03456+K14402+K13917+K14324
Pyrimidine metabolism	48	176	0.00533116	0.0522636	ko00240	Unigene0000519;Unigene0000685;Unigene0001186;Unigene0001626;Unigene0001755;Unigene0001931;Unigene0003031;Unigene0003055;Unigene0003860;Unigene0004223;Unigene0006676;Unigene0008945;Unigene0009038;Unigene0011310;Unigene0011631;Unigene0015739;Unigene0016025;Unigene0019216;Unigene0019827;Unigene0021939;Unigene0022536;Unigene0023923;Unigene0025478;Unigene0027918;Unigene0027970;Unigene0028427;Unigene00…	K01955+K03006+K00609+K03026+K16329+K03019+K01510+K10807+K03025+K02335+K13800+K03013+K02327+K14641+K03017+K03021+K01956+K00962+K01464+K01513+K03023+K03015+K10808+K13998+K00254+K03016+K03002+K01431+K02999+K03504+K00962+K03505+K03506+K03505+K02328+K00876+K03010+K00943+K03020+K02326+K03787+K03012+K03005+K13421+K01510+K01465+K01081+K03024
Folate biosynthesis	13	33	0.00567202	0.0522636	ko00790	Unigene0000365;Unigene0002257;Unigene0003016;Unigene0003969;Unigene0010940;Unigene0013798;Unigene0024672;Unigene0027147;Unigene0027918;Unigene0029850;Unigene0033782;Unigene0034698;Unigene0049205	K13941+K00079+K20457+K15631+K01113+K15376+K03637+K01930+K13998+K01930+K18482+K01724+K18482
RNA transport	78	313	0.00663265	0.0570407	ko03013	Unigene0000025;Unigene0000078;Unigene0000093;Unigene0000121;Unigene0000131;Unigene0000133;Unigene0001155;Unigene0002540;Unigene0003759;Unigene0004129;Unigene0004171;Unigene0004788;Unigene0004872;Unigene0005924;Unigene0006326;Unigene0007313;Unigene0008093;Unigene0008455;Unigene0009132;Unigene0009550;Unigene0009818;Unigene0010519;Unigene0011072;Unigene0011800;Unigene0012230;Unigene0013097;Unigene00…	K12812+K03254+K14327+K14326+K09291+K14301+K14305+K05749+K03246+K14304+K12876+K03680+K03260+K12875+K12879+K13126+K01164+K14309+K14312+K03262+K03243+K12880+K13025+K03236+K12882+K13126+K14299+K03260+K14310+K14319+K03239+K14300+K14293+K03251+K07936+K13114+K03257+K05019+K03539+K03242+K13130+K03754+K14290+K13151+K03248+K03538+K12878+K14288+K14318+K03680+K14291+K14317+K14321+K14319+K12812+K12877+K03113+…
RNA degradation	45	169	0.010746	0.0866397	ko03018	Unigene0000095;Unigene0000164;Unigene0000399;Unigene0003404;Unigene0004349;Unigene0004840;Unigene0007313;Unigene0009616;Unigene0013097;Unigene0013487;Unigene0014676;Unigene0015987;Unigene0016501;Unigene0017394;Unigene0018446;Unigene0019216;Unigene0019261;Unigene0019323;Unigene0019394;Unigene0020625;Unigene0021837;Unigene0024039;Unigene0024171;Unigene0026699;Unigene0026731;Unigene0027367;Unigene00…	K12598+K12599+K12604+K12605+K10643+K12598+K13126+K12580+K13126+K04077+K12617+K12603+K12607+K12593+K00850+K00962+K12603+K11600+K12585+K01689+K04077+K12627+K04077+K03681+K12608+K01148+K12581+K12614+K12600+K12623+K10643+K12591+K00962+K12616+K12619+K01689+K12587+K00850+K12603+K12608+K13126+K12581+K01689+K03678+K00850
Phenylalanine, tyrosine and tryptophan biosynthesis	20	64	0.0142701	0.103325	ko00400	Unigene0000117;Unigene0000318;Unigene0002521;Unigene0015794;Unigene0024974;Unigene0024995;Unigene0026460;Unigene0026754;Unigene0030348;Unigene0030967;Unigene0033179;Unigene0035556;Unigene0036492;Unigene0039542;Unigene0042369;Unigene0044657;Unigene0045539;Unigene0045803;Unigene0045829;Unigene0046177	K01626+K00811+K01696+K01695+K01626+K14454+K01626+K00891+K00815+K01657+K15227+K01735+K14455+K01658+K01817+K05359+K01626+K15227+K00800+K00817
Basal transcription factors	19	60	0.0144174	0.103325	ko03022	Unigene0002599;Unigene0004836;Unigene0004939;Unigene0006609;Unigene0010051;Unigene0017898;Unigene0019758;Unigene0025803;Unigene0026207;Unigene0026875;Unigene0034424;Unigene0039592;Unigene0041003;Unigene0044230;Unigene0046866;Unigene0047173;Unigene0047192;Unigene0047525;Unigene0048331	K10844+K03125+K14649+K10843+K03136+K03124+K03123+K03137+K03132+K03124+K03141+K03143+K06634+K03128+K03130+K02202+K03135+K03133+K03129
Homologous recombination	27	95	0.0186088	0.126344	ko03440	Unigene0004223;Unigene0006725;Unigene0009038;Unigene0009111;Unigene0012192;Unigene0012542;Unigene0016332;Unigene0018312;Unigene0021477;Unigene0021716;Unigene0025822;Unigene0032683;Unigene0032828;Unigene0033410;Unigene0034773;Unigene0035040;Unigene0035893;Unigene0037981;Unigene0038521;Unigene0038928;Unigene0041457;Unigene0042832;Unigene0044156;Unigene0044348;Unigene0044640;Unigene0044689;Unigene00…	K02335+K03165+K02327+K07466+K03111+K10880+K07466+K10875+K10875+K10901+K11864+K03165+K10728+K10881+K10869+K03504+K10740+K10739+K03505+K10866+K03505+K07466+K02328+K10865+K20776+K10867+K10882
Isoquinoline alkaloid biosynthesis	10	27	0.0232461	0.145567	ko00950	Unigene0000318;Unigene0004498;Unigene0004499;Unigene0011602;Unigene0013414;Unigene0024995;Unigene0030348;Unigene0036492;Unigene0041429;Unigene0048257	K00811+K00422+K00422+K00276+K00422+K14454+K00815+K14455+K00422+K00422
Porphyrin and chlorophyll metabolism	19	63	0.0242796	0.145567	ko00860	Unigene0002286;Unigene0002879;Unigene0010999;Unigene0012032;Unigene0014904;Unigene0015674;Unigene0018587;Unigene0026772;Unigene0029023;Unigene0030064;Unigene0030456;Unigene0031089;Unigene0032794;Unigene0035922;Unigene0036526;Unigene0045025;Unigene0045932;Unigene0047228;Unigene0048995	K08101+K13606+K01599+K02492+K08099+K01772+K01772+K01599+K00231+K01749+K00231+K10960+K03404+K18010+K13071+K02259+K04040+K04035+K13545
Glycosaminoglycan degradation	6	13	0.0248254	0.145567	ko00531	Unigene0002924;Unigene0005787;Unigene0019206;Unigene0025946;Unigene0046824;Unigene0049315	K10532+K01205+K10532+K12309+K07964+K12373
Vitamin B6 metabolism	9	25	0.0368902	0.206906	ko00750	Unigene0000015;Unigene0011960;Unigene0013861;Unigene0018319;Unigene0023507;Unigene0023844;Unigene0028156;Unigene0030108;Unigene0043252	K01733+K06215+K00275+K00831+K05275+K08681+K00868+K00275+K01733
One carbon pool by folate	11	33	0.0389228	0.20921	ko00670	Unigene0004011;Unigene0006278;Unigene0011686;Unigene0018633;Unigene0027918;Unigene0030621;Unigene0039364;Unigene0044229;Unigene0044572;Unigene0048980;Unigene0049492	K01934+K00297+K00600+K01938+K13998+K00605+K00604+K00288+K01433+K00602+K01934
Proteasome	25	95	0.0547237	0.275417	ko03050	Unigene0001150;Unigene0001795;Unigene0002643;Unigene0002781;Unigene0003843;Unigene0005516;Unigene0007945;Unigene0008087;Unigene0011822;Unigene0014428;Unigene0014466;Unigene0016143;Unigene0016857;Unigene0016922;Unigene0018392;Unigene0018553;Unigene0018995;Unigene0019532;Unigene0019844;Unigene0020373;Unigene0022322;Unigene0028469;Unigene0028919;Unigene0033410;Unigene0044590	K06699+K03039+K03030+K02729+K02727+K03036+K03037+K03033+K03031+K02726+K03029+K02730+K03064+K03066+K02735+K02739+K03063+K03028+K06700+K03065+K02731+K03033+K03062+K10881+K06691
Protein export	20	73	0.0555104	0.275417	ko03060	Unigene0003157;Unigene0010320;Unigene0012448;Unigene0013057;Unigene0016488;Unigene0017311;Unigene0019353;Unigene0021381;Unigene0021491;Unigene0021934;Unigene0025504;Unigene0026148;Unigene0029946;Unigene0031737;Unigene0040881;Unigene0045611;Unigene0047338;Unigene0048462;Unigene0048477;Unigene0048717	K03106+K09648+K03107+K12272+K03217+K09647+K09647+K09481+K03110+K13431+K09540+K03106+K12275+K03070+K03217+K03070+K03217+K10956+K03105+K03070
Galactose metabolism	23	87	0.0606667	0.289852	ko00052	Unigene0004772;Unigene0009126;Unigene0018446;Unigene0021454;Unigene0024533;Unigene0025268;Unigene0025946;Unigene0028356;Unigene0030717;Unigene0039492;Unigene0041002;Unigene0042541;Unigene0042820;Unigene0044160;Unigene0044713;Unigene0044747;Unigene0045359;Unigene0045846;Unigene0045985;Unigene0046514;Unigene0046826;Unigene0047715;Unigene0048625	K06617+K01193+K00850+K01835+K01785+K06617+K12309+K07407+K18819+K00844+K00965+K06617+K01190+K01835+K18819+K00850+K00963+K00963+K06617+K12447+K01784+K01187+K00850
Valine, leucine and isoleucine biosynthesis	10	32	0.0715225	0.324768	ko00290	Unigene0001783;Unigene0002980;Unigene0003750;Unigene0011131;Unigene0015599;Unigene0018287;Unigene0028580;Unigene0029944;Unigene0044408;Unigene0049485	K01704+K01653+K00052+K00826+K01649+K00053+K00826+K01687+K01703+K01754
Autophagy - other eukaryotes	17	62	0.0730098	0.324768	ko04136	Unigene0000088;Unigene0000170;Unigene0000366;Unigene0001048;Unigene0002027;Unigene0008052;Unigene0017337;Unigene0018812;Unigene0020700;Unigene0022634;Unigene0026996;Unigene0027940;Unigene0028510;Unigene0030961;Unigene0038006;Unigene0045366;Unigene0049128	K08269+K08333+K17906+K07203+K17888+K08341+K08331+K00914+K04382+K08266+K17907+K08334+K07204+K17890+K17606+K08337+K08330
DNA replication	24	94	0.0792641	0.340836	ko03030	Unigene0003315;Unigene0004148;Unigene0004223;Unigene0008985;Unigene0009038;Unigene0009111;Unigene0012192;Unigene0016332;Unigene0018485;Unigene0020891;Unigene0034393;Unigene0035040;Unigene0035893;Unigene0037981;Unigene0038521;Unigene0039345;Unigene0041457;Unigene0042832;Unigene0044156;Unigene0044503;Unigene0046010;Unigene0046760;Unigene0047362;Unigene0049491	K10754+K10755+K02335+K10743+K02327+K07466+K03111+K07466+K10747+K10755+K10747+K03504+K10740+K10739+K03505+K03506+K03505+K07466+K02328+K04799+K10756+K02326+K04802+K10755
Glucosinolate biosynthesis	5	13	0.0858769	0.357359	ko00966	Unigene0010125;Unigene0011131;Unigene0016513;Unigene0028580;Unigene0044408	K11820+K00826+K11820+K00826+K01703
Lysine biosynthesis	6	17	0.0900947	0.363194	ko00300	Unigene0001165;Unigene0027501;Unigene0028116;Unigene0036683;Unigene0044205;Unigene0045169	K12524+K00215+K01586+K01714+K10206+K00928
Nicotinate and nicotinamide metabolism	9	30	0.105567	0.404889	ko00760	Unigene0008582;Unigene0021939;Unigene0025922;Unigene0029319;Unigene0031053;Unigene0034523;Unigene0038384;Unigene0046786;Unigene0048668	K18551+K01513+K01950+K00763+K00767+K18551+K00858+K03787+K01081
Glycerophospholipid metabolism	27	111	0.106715	0.404889	ko00564	Unigene0001722;Unigene0005592;Unigene0005766;Unigene0007325;Unigene0008396;Unigene0010597;Unigene0012918;Unigene0014668;Unigene0015035;Unigene0017283;Unigene0018151;Unigene0020997;Unigene0025162;Unigene0026646;Unigene0027172;Unigene0029117;Unigene0030458;Unigene0031656;Unigene0032163;Unigene0036577;Unigene0039499;Unigene0044935;Unigene0045406;Unigene0046138;Unigene0048054;Unigene0048073;Unigene00…	K05929+K13519+K00550+K00967+K00981+K01114+K00981+K08730+K22389+K01115+K14674+K01613+K00630+K00901+K18693+K01517+K15728+K13513+K00993+K06130+K13508+K00995+K13523+K00655+K00968+K01613+K01114
Tyrosine metabolism	16	61	0.111143	0.40964	ko00350	Unigene0000318;Unigene0004498;Unigene0004499;Unigene0011602;Unigene0013414;Unigene0024995;Unigene0029119;Unigene0030348;Unigene0036492;Unigene0036748;Unigene0041429;Unigene0046177;Unigene0046647;Unigene0046974;Unigene0047298;Unigene0048257	K00811+K00422+K00422+K00276+K00422+K14454+K00451+K00815+K14455+K01555+K00422+K00817+K00121+K00121+K00001+K00422
2-Oxocarboxylic acid metabolism	27	112	0.116047	0.415835	ko01210	Unigene0000318;Unigene0001314;Unigene0001783;Unigene0002980;Unigene0003750;Unigene0009974;Unigene0010125;Unigene0011131;Unigene0014975;Unigene0015599;Unigene0016513;Unigene0017077;Unigene0017166;Unigene0018287;Unigene0019506;Unigene0020464;Unigene0024995;Unigene0026116;Unigene0028580;Unigene0029275;Unigene0029944;Unigene0035339;Unigene0036492;Unigene0039338;Unigene0042440;Unigene0044408;Unigene00…	K00811+K01647+K01704+K01653+K00052+K14682+K11820+K00826+K00145+K01649+K11820+K00031+K00030+K00053+K14677+K01647+K14454+K00031+K00826+K00818+K01687+K00814+K14455+K14272+K00930+K01703+K00928
Arginine biosynthesis	16	62	0.124406	0.43374	ko00220	Unigene0000174;Unigene0000318;Unigene0007523;Unigene0009974;Unigene0012409;Unigene0014975;Unigene0019317;Unigene0019472;Unigene0019506;Unigene0024995;Unigene0029275;Unigene0035339;Unigene0036492;Unigene0039338;Unigene0042440;Unigene0045107	K01427+K00811+K01915+K14682+K01940+K00145+K00262+K00611+K14677+K14454+K00818+K00814+K14455+K14272+K00930+K13427
Phosphonate and phosphinate metabolism	3	7	0.134649	0.450224	ko00440	Unigene0007325;Unigene0032163;Unigene0048054	K00967+K00993+K00968
Other glycan degradation	7	23	0.136114	0.450224	ko00511	Unigene0021099;Unigene0025946;Unigene0030692;Unigene0036417;Unigene0037923;Unigene0042820;Unigene0049315	K01227+K12309+K17108+K01444+K01206+K01190+K12373
Metabolic pathways	628	3171	0.143503	0.45298	ko01100	Unigene0000015;Unigene0000039;Unigene0000080;Unigene0000117;Unigene0000174;Unigene0000230;Unigene0000318;Unigene0000355;Unigene0000365;Unigene0000519;Unigene0000634;Unigene0000651;Unigene0000685;Unigene0000690;Unigene0000760;Unigene0000880;Unigene0000964;Unigene0001077;Unigene0001103;Unigene0001132;Unigene0001165;Unigene0001186;Unigene0001314;Unigene0001339;Unigene0001364;Unigene0001425;Unigene00…	K01733+K12446+K21456+K01626+K01427+K01590+K00811+K08679+K13941+K01955+K00888+K00264+K03006+K00921+K00873+K11262+K01231+K15397+K00654+K01662+K12524+K00609+K01647+K00281+K00939+K01765+K01057+K01256+K03026+K00748+K01810+K05605+K16054+K01704+K05349+K00547+K03019+K07432+K01662+K08232+K05284+K00079+K04708+K01696+K03857+K01188+K01251+K13606+K00688+K10532+K01653+K01580+K00679+K20457+K10807+K09828+K00026+…
C5-Branched dibasic acid metabolism	4	11	0.14397	0.45298	ko00660	Unigene0001783;Unigene0002980;Unigene0003750;Unigene0044408	K01704+K01653+K00052+K01703
RNA polymerase	17	69	0.1593	0.489279	ko03020	Unigene0000685;Unigene0001626;Unigene0001931;Unigene0003860;Unigene0008945;Unigene0011631;Unigene0015739;Unigene0022536;Unigene0023923;Unigene0028427;Unigene0032494;Unigene0033535;Unigene0044755;Unigene0046459;Unigene0047107;Unigene0047832;Unigene0049344	K03006+K03026+K03019+K03025+K03013+K03017+K03021+K03023+K03015+K03016+K03002+K02999+K03010+K03020+K03012+K03005+K03024
Caffeine metabolism	2	4	0.168769	0.4948	ko00232	Unigene0005266;Unigene0035247	K00106+K00365
Glycosphingolipid biosynthesis - ganglio series	2	4	0.168769	0.4948	ko00604	Unigene0025946;Unigene0049315	K12309+K12373
Carotenoid biosynthesis	10	38	0.179612	0.514889	ko00906	Unigene0011373;Unigene0012187;Unigene0017801;Unigene0024274;Unigene0028329;Unigene0030589;Unigene0034171;Unigene0044637;Unigene0045996;Unigene0049568	K09837+K09840+K00514+K06444+K09835+K06443+K09843+K02293+K15744+K09841
Amino sugar and nucleotide sugar metabolism	42	193	0.204957	0.574772	ko00520	Unigene0000039;Unigene0000355;Unigene0001082;Unigene0001200;Unigene0001426;Unigene0001718;Unigene0001780;Unigene0008583;Unigene0010804;Unigene0013951;Unigene0015740;Unigene0017502;Unigene0018294;Unigene0021454;Unigene0021972;Unigene0022373;Unigene0023272;Unigene0025397;Unigene0026528;Unigene0027427;Unigene0028544;Unigene0037960;Unigene0038756;Unigene0039492;Unigene0040892;Unigene0041002;Unigene00…	K12446+K08679+K01209+K13648+K13648+K01810+K00326+K00847+K00972+K00966+K08679+K00975+K01836+K01835+K00847+K16190+K08678+K13648+K13648+K12448+K01183+K18677+K05305+K00844+K01183+K00965+K06118+K01183+K00975+K01835+K00326+K00012+K00963+K00963+K13648+K12447+K01711+K01784+K00820+K15920+K12373+K13648
Propanoate metabolism	17	74	0.244136	0.667657	ko00640	Unigene0000880;Unigene0001751;Unigene0004897;Unigene0004917;Unigene0007851;Unigene0010073;Unigene0010137;Unigene0024715;Unigene0037741;Unigene0038567;Unigene0040244;Unigene0040359;Unigene0044374;Unigene0044461;Unigene0045140;Unigene0046382;Unigene0047051	K11262+K05605+K01899+K00167+K01962+K00016+K01961+K01962+K00249+K01578+K00382+K00140+K00140+K01900+K05605+K01895+K09699
Brassinosteroid biosynthesis	5	18	0.254232	0.667657	ko00905	Unigene0005044;Unigene0006415;Unigene0022767;Unigene0035774;Unigene0047010	K09587+K09590+K12637+K09591+K20623
Biosynthesis of amino acids	96	469	0.255089	0.667657	ko01230	Unigene0000015;Unigene0000117;Unigene0000318;Unigene0000651;Unigene0000760;Unigene0001165;Unigene0001314;Unigene0001783;Unigene0002521;Unigene0002980;Unigene0003750;Unigene0004001;Unigene0005562;Unigene0006380;Unigene0007523;Unigene0007648;Unigene0008848;Unigene0009974;Unigene0011131;Unigene0011686;Unigene0012409;Unigene0014975;Unigene0015599;Unigene0015794;Unigene0016423;Unigene0017077;Unigene00…	K01733+K01626+K00811+K00264+K00873+K12524+K01647+K01704+K01696+K01653+K00052+K01803+K01620+K01663+K01915+K00873+K00873+K14682+K00826+K00600+K01940+K00145+K01649+K01695+K00873+K00031+K00030+K00640+K00053+K00831+K00850+K00616+K00286+K00611+K14677+K00927+K01647+K01689+K00615+K00765+K01783+K00948+K01626+K14454+K00789+K01623+K00031+K01626+K00891+K01834+K00640+K00215+K01586+K00826+K01739+K00818+K01760+…
Sphingolipid metabolism	11	46	0.258782	0.667657	ko00600	Unigene0001103;Unigene0002514;Unigene0012749;Unigene0020609;Unigene0020767;Unigene0025946;Unigene0028356;Unigene0030692;Unigene0040738;Unigene0042820;Unigene0046298	K00654+K04708+K04710+K04715+K01634+K12309+K07407+K17108+K04718+K01190+K04712
Pantothenate and CoA biosynthesis	11	47	0.283604	0.717351	ko00770	Unigene0002980;Unigene0004324;Unigene0011131;Unigene0015702;Unigene0018287;Unigene0019827;Unigene0021939;Unigene0028580;Unigene0029944;Unigene0032998;Unigene0040457	K01653+K01918+K00826+K06133+K00053+K01464+K01513+K00826+K01687+K01431+K09680
Monobactam biosynthesis	5	19	0.294668	0.731003	ko00261	Unigene0001165;Unigene0018295;Unigene0027501;Unigene0036683;Unigene0045169	K12524+K13811+K00215+K01714+K00928
Glycine, serine and threonine metabolism	23	107	0.308902	0.741977	ko00260	Unigene0000015;Unigene0001165;Unigene0001339;Unigene0002521;Unigene0005562;Unigene0011602;Unigene0011686;Unigene0015794;Unigene0018319;Unigene0019278;Unigene0027211;Unigene0027723;Unigene0029142;Unigene0030621;Unigene0039104;Unigene0039338;Unigene0040244;Unigene0041840;Unigene0043252;Unigene0045169;Unigene0047583;Unigene0047711;Unigene0049485	K01733+K12524+K00281+K01696+K01620+K00276+K00600+K01695+K00831+K00130+K01834+K15918+K02437+K00605+K00827+K14272+K00382+K00830+K01733+K00928+K15919+K01834+K01754
Cysteine and methionine metabolism	34	162	0.310595	0.741977	ko00270	Unigene0000080;Unigene0000318;Unigene0001165;Unigene0001778;Unigene0001927;Unigene0002807;Unigene0003219;Unigene0005952;Unigene0009817;Unigene0010073;Unigene0010426;Unigene0011131;Unigene0017903;Unigene0018368;Unigene0018804;Unigene0020383;Unigene0024841;Unigene0024995;Unigene0025512;Unigene0025518;Unigene0026774;Unigene0027312;Unigene0028580;Unigene0029196;Unigene0029307;Unigene0030348;Unigene00…	K21456+K00811+K12524+K16054+K00547+K01251+K00026+K00547+K00558+K00016+K00026+K00826+K00640+K01919+K00026+K01761+K00899+K14454+K00789+K00797+K00547+K00640+K00826+K01739+K01760+K00815+K01244+K14455+K00827+K00928+K01738+K13034+K01011+K00797
Tropane, piperidine and pyridine alkaloid biosynthesis	7	29	0.31673	0.742875	ko00960	Unigene0000318;Unigene0011602;Unigene0024995;Unigene0028390;Unigene0030348;Unigene0036492;Unigene0046177	K00811+K00276+K14454+K08081+K00815+K14455+K00817
Sulfur relay system	5	20	0.336055	0.774127	ko04122	Unigene0011241;Unigene0019516;Unigene0024672;Unigene0036457;Unigene0047033	K11996+K12161+K03637+K14168+K01011
Inositol phosphate metabolism	22	104	0.343829	0.778139	ko00562	Unigene0000634;Unigene0000690;Unigene0001425;Unigene0004001;Unigene0005735;Unigene0010597;Unigene0013464;Unigene0013819;Unigene0014480;Unigene0016480;Unigene0016671;Unigene0018812;Unigene0023609;Unigene0027210;Unigene0030669;Unigene0040359;Unigene0044362;Unigene0044374;Unigene0044769;Unigene0048107;Unigene0048521;Unigene0048874	K00888+K00921+K01765+K01803+K15422+K01114+K20279+K10572+K05857+K19801+K01092+K00914+K03103+K00889+K00913+K00140+K00915+K00140+K00913+K01114+K18649+K01858
Arachidonic acid metabolism	6	26	0.382326	0.848729	ko00590	Unigene0002257;Unigene0015903;Unigene0016452;Unigene0018151;Unigene0035680;Unigene0049430	K00079+K01254+K00432+K14674+K15730+K05309
Thiamine metabolism	11	51	0.388178	0.848729	ko00730	Unigene0001132;Unigene0001364;Unigene0001961;Unigene0005919;Unigene0014379;Unigene0024818;Unigene0029542;Unigene0041332;Unigene0043961;Unigene0045565;Unigene0048416	K01662+K00939+K01662+K00939+K06949+K06928+K14153+K00878+K00939+K00949+K00939
Ubiquinone and other terpenoid-quinone biosynthesis	13	62	0.412141	0.863539	ko00130	Unigene0004447;Unigene0004795;Unigene0005599;Unigene0019175;Unigene0025643;Unigene0027887;Unigene0030348;Unigene0033959;Unigene0035487;Unigene0044312;Unigene0046574;Unigene0048034;Unigene0048226	K01904+K12502+K01904+K06127+K05928+K01904+K00815+K03809+K00487+K03809+K06126+K14760+K00591
SNARE interactions in vesicular transport	9	42	0.417557	0.863539	ko04130	Unigene0001632;Unigene0002734;Unigene0002833;Unigene0005668;Unigene0007531;Unigene0014233;Unigene0018970;Unigene0024855;Unigene0047789	K08490+K08495+K08515+K08503+K08490+K08517+K08515+K08486+K08488
Riboflavin metabolism	6	27	0.419867	0.863539	ko00740	Unigene0021939;Unigene0023066;Unigene0036852;Unigene0044087;Unigene0047231;Unigene0047261	K01513+K11752+K00794+K14379+K11752+K18453
Photosynthesis	15	73	0.431937	0.863539	ko00195	Unigene0003808;Unigene0004040;Unigene0010259;Unigene0013756;Unigene0015091;Unigene0015965;Unigene0019795;Unigene0026984;Unigene0027183;Unigene0027968;Unigene0028061;Unigene0042075;Unigene0044066;Unigene0045929;Unigene0049528	K02639+K08906+K02109+K02639+K02705+K02115+K08901+K02695+K02635+K02115+K02639+K02111+K02694+K02703+K08901
Glycerolipid metabolism	29	145	0.437421	0.863539	ko00561	Unigene0003006;Unigene0003962;Unigene0005592;Unigene0010775;Unigene0015299;Unigene0018151;Unigene0018933;Unigene0019194;Unigene0020259;Unigene0025162;Unigene0025829;Unigene0026646;Unigene0027172;Unigene0027723;Unigene0028148;Unigene0028356;Unigene0030458;Unigene0031598;Unigene0031630;Unigene0031656;Unigene0039499;Unigene0042497;Unigene0043822;Unigene0045154;Unigene0045406;Unigene0046138;Unigene00…	K00679+K01054+K13519+K01054+K06119+K14674+K03715+K22848+K01054+K00630+K00864+K00901+K18693+K15918+K00128+K07407+K15728+K00002+K01054+K13513+K13508+K06118+K00863+K09480+K13523+K00655+K09480+K21362+K00128
Phosphatidylinositol signaling system	20	99	0.44089	0.863539	ko04070	Unigene0000316;Unigene0000634;Unigene0000690;Unigene0005735;Unigene0008396;Unigene0012918;Unigene0012962;Unigene0013464;Unigene0013819;Unigene0014480;Unigene0016480;Unigene0016671;Unigene0018812;Unigene0026646;Unigene0027210;Unigene0030669;Unigene0031805;Unigene0044362;Unigene0044769;Unigene0048521	K13024+K00888+K00921+K15422+K00981+K00981+K02183+K20279+K10572+K05857+K19801+K01092+K00914+K00901+K00889+K00913+K02183+K00915+K00913+K18649
Circadian rhythm - plant	11	53	0.441811	0.863539	ko04712	Unigene0000035;Unigene0012493;Unigene0012997;Unigene0016314;Unigene0030780;Unigene0031644;Unigene0031760;Unigene0041665;Unigene0043053;Unigene0047792;Unigene0048286	K12124+K12115+K03097+K16221+K12127+K10143+K16240+K12129+K12118+K12119+K12130
Flavone and flavonol biosynthesis	1	3	0.472756	0.90918	ko00944	Unigene0029903	K05280
Ether lipid metabolism	6	29	0.493711	0.90918	ko00565	Unigene0005592;Unigene0010597;Unigene0017283;Unigene0018151;Unigene0032163;Unigene0048107	K13519+K01114+K01115+K14674+K00993+K01114
Sulfur metabolism	11	55	0.495009	0.90918	ko00920	Unigene0005735;Unigene0017903;Unigene0018295;Unigene0021655;Unigene0027312;Unigene0029196;Unigene0042402;Unigene0045332;Unigene0046325;Unigene0047033;Unigene0047293	K15422+K00640+K13811+K00392+K00640+K01739+K05907+K01738+K13034+K01011+K00387
Ubiquitin mediated proteolysis	39	201	0.501234	0.90918	ko04120	Unigene0001395;Unigene0005133;Unigene0005971;Unigene0006195;Unigene0006673;Unigene0008509;Unigene0010016;Unigene0012876;Unigene0013998;Unigene0013999;Unigene0016276;Unigene0017331;Unigene0018387;Unigene0018702;Unigene0020552;Unigene0021193;Unigene0021554;Unigene0023875;Unigene0025328;Unigene0027035;Unigene0028016;Unigene0028032;Unigene0028089;Unigene0028460;Unigene0029494;Unigene0030544;Unigene00…	K06688+K03364+K10610+K03351+K10589+K10580+K04506+K10573+K03094+K03094+K10597+K04506+K10604+K10685+K10601+K10609+K10590+K03363+K10604+K03355+K10575+K03094+K10144+K10686+K03354+K10581+K10143+K03357+K06689+K10599+K10598+K03350+K10144+K20217+K03354+K04506+K10588+K03353+K03349
Other types of O-glycan biosynthesis	4	19	0.510148	0.90918	ko00514	Unigene0003430;Unigene0006516;Unigene0013034;Unigene0022401	K09667+K20784+K20782+K09667
Fructose and mannose metabolism	22	113	0.510407	0.90918	ko00051	Unigene0004001;Unigene0008583;Unigene0013406;Unigene0013951;Unigene0014055;Unigene0018446;Unigene0021972;Unigene0025718;Unigene0029900;Unigene0030275;Unigene0030625;Unigene0031712;Unigene0038756;Unigene0039373;Unigene0039492;Unigene0043822;Unigene0044604;Unigene0044639;Unigene0044747;Unigene0044878;Unigene0046652;Unigene0048625	K01803+K00847+K00895+K00966+K18447+K00850+K00847+K01623+K01805+K03841+K19355+K01103+K05305+K03841+K00844+K00863+K03841+K00008+K00850+K19355+K01711+K00850
Alanine, aspartate and glutamate metabolism	21	108	0.514497	0.90918	ko00250	Unigene0000318;Unigene0000519;Unigene0000651;Unigene0001186;Unigene0002997;Unigene0007523;Unigene0012409;Unigene0016025;Unigene0017578;Unigene0019317;Unigene0021427;Unigene0023919;Unigene0024995;Unigene0025560;Unigene0035339;Unigene0036492;Unigene0039104;Unigene0039338;Unigene0039878;Unigene0041840;Unigene0048274	K00811+K01955+K00264+K00609+K01580+K01915+K01940+K01956+K01939+K00262+K00294+K01756+K14454+K00764+K00814+K14455+K00827+K14272+K13566+K00830+K00820
Fatty acid biosynthesis	13	67	0.533519	0.930053	ko00061	Unigene0000880;Unigene0005459;Unigene0005628;Unigene0007851;Unigene0009658;Unigene0010137;Unigene0014060;Unigene0021366;Unigene0024715;Unigene0028873;Unigene0029069;Unigene0029799;Unigene0045068	K11262+K10781+K01897+K01962+K00648+K01961+K03921+K01897+K01962+K00208+K00645+K01897+K09458
Glycosphingolipid biosynthesis - globo and isoglobo series	2	10	0.600053	1	ko00603	Unigene0028356;Unigene0049315	K07407+K12373
Selenocompound metabolism	9	51	0.667435	1	ko00450	Unigene0003426;Unigene0004811;Unigene0016823;Unigene0018295;Unigene0020383;Unigene0028457;Unigene0029196;Unigene0029307;Unigene0029958	K08247+K01874+K11717+K13811+K01761+K00384+K01739+K01760+K01874
Steroid biosynthesis	8	46	0.681426	1	ko00100	Unigene0003158;Unigene0003978;Unigene0007736;Unigene0018151;Unigene0023155;Unigene0036676;Unigene0045877;Unigene0048057	K09828+K07748+K01824+K14674+K00801+K08246+K00222+K00227
Nitrogen metabolism	9	52	0.691052	1	ko00910	Unigene0000651;Unigene0007523;Unigene0019317;Unigene0020651;Unigene0031513;Unigene0034620;Unigene0035034;Unigene0046171;Unigene0048295	K00264+K01915+K00262+K00284+K02575+K01673+K01673+K00366+K01673
Histidine metabolism	10	58	0.700071	1	ko00340	Unigene0000230;Unigene0006380;Unigene0023286;Unigene0028148;Unigene0029481;Unigene0033379;Unigene0033996;Unigene0046177;Unigene0048521;Unigene0048853	K01590+K01663+K00765+K00128+K01814+K11755+K01693+K00817+K18649+K00128
Starch and sucrose metabolism	35	195	0.702731	1	ko00500	Unigene0001718;Unigene0001796;Unigene0002616;Unigene0002889;Unigene0004747;Unigene0007578;Unigene0008583;Unigene0009126;Unigene0014055;Unigene0015122;Unigene0017502;Unigene0020907;Unigene0021454;Unigene0021939;Unigene0021972;Unigene0025455;Unigene0026762;Unigene0029714;Unigene0031341;Unigene0031812;Unigene0032613;Unigene0039492;Unigene0040934;Unigene0043926;Unigene0044160;Unigene0044828;Unigene00…	K01810+K05349+K01188+K00688+K01214+K00700+K00847+K01193+K18447+K01194+K00975+K00705+K01835+K01513+K00847+K00703+K01188+K19893+K01188+K01176+K00703+K00844+K01214+K00975+K01835+K05349+K00963+K05350+K00700+K00963+K00700+K00705+K01187+K13679+K05349
Indole alkaloid biosynthesis	1	6	0.722089	1	ko00901	Unigene0040005	K21026
Endocytosis	49	273	0.728292	1	ko04144	Unigene0000109;Unigene0001656;Unigene0002284;Unigene0002389;Unigene0002852;Unigene0003719;Unigene0006383;Unigene0007612;Unigene0009048;Unigene0009939;Unigene0010943;Unigene0011351;Unigene0011404;Unigene0017283;Unigene0017944;Unigene0019430;Unigene0019808;Unigene0020471;Unigene0021377;Unigene0022265;Unigene0022607;Unigene0022688;Unigene0023831;Unigene0024654;Unigene0024842;Unigene0025995;Unigene00…	K03283+K19476+K05756+K03283+K03283+K12198+K12471+K11824+K12197+K19476+K03283+K12185+K12193+K01115+K07904+K18466+K12191+K19476+K12479+K12471+K12489+K12196+K12190+K07904+K10396+K10364+K00889+K11827+K12489+K12486+K11866+K01528+K07904+K07937+K05755+K12189+K19366+K12200+K07904+K11826+K12195+K05757+K19366+K15053+K07904+K10365+K12486+K12486+K05758
Flavonoid biosynthesis	10	60	0.741275	1	ko00941	Unigene0000172;Unigene0004877;Unigene0006114;Unigene0013374;Unigene0022231;Unigene0029903;Unigene0031104;Unigene0035005;Unigene0035487;Unigene0044510	K08695+K00588+K01859+K05278+K00475+K05280+K13082+K13065+K00487+K13065
beta-Alanine metabolism	17	100	0.751393	1	ko00410	Unigene0001541;Unigene0001751;Unigene0002997;Unigene0004324;Unigene0007507;Unigene0011602;Unigene0019827;Unigene0025518;Unigene0028148;Unigene0032998;Unigene0037741;Unigene0038567;Unigene0040359;Unigene0044374;Unigene0045140;Unigene0048853;Unigene0049283	K17839+K05605+K01580+K01918+K13366+K00276+K01464+K00797+K00128+K01431+K00249+K01578+K00140+K00140+K05605+K00128+K00797
Biotin metabolism	5	32	0.763754	1	ko00780	Unigene0007091;Unigene0024370;Unigene0028873;Unigene0037112;Unigene0045068	K19562+K00652+K00208+K01012+K09458
Phenylalanine metabolism	12	73	0.77034	1	ko00360	Unigene0000318;Unigene0004447;Unigene0004877;Unigene0005599;Unigene0011602;Unigene0024995;Unigene0027887;Unigene0028210;Unigene0030348;Unigene0035487;Unigene0036492;Unigene0046177	K00811+K01904+K00588+K01904+K00276+K14454+K01904+K00074+K00815+K00487+K14455+K00817
Synthesis and degradation of ketone bodies	1	7	0.77552	1	ko00072	Unigene0027377	K01641
Lipoic acid metabolism	1	8	0.818684	1	ko00785	Unigene0008604	K03644
Monoterpenoid biosynthesis	1	8	0.818684	1	ko00902	Unigene0030733	K15095
Diterpenoid biosynthesis	3	22	0.823724	1	ko00904	Unigene0007072;Unigene0025854;Unigene0029735	K04122+K17961+K04123
Protein processing in endoplasmic reticulum	72	411	0.83103	1	ko04141	Unigene0000109;Unigene0000367;Unigene0001624;Unigene0001686;Unigene0002389;Unigene0002852;Unigene0002881;Unigene0002914;Unigene0004992;Unigene0010118;Unigene0010635;Unigene0010899;Unigene0010943;Unigene0012076;Unigene0012167;Unigene0012616;Unigene0013404;Unigene0013998;Unigene0013999;Unigene0015247;Unigene0016276;Unigene0016325;Unigene0016528;Unigene0017557;Unigene0018546;Unigene0020214;Unigene00…	K03283+K11718+K09518+K10666+K03283+K03283+K08057+K09580+K09487+K13993+K09486+K14018+K03283+K10085+K12667+K08054+K10839+K03094+K03094+K01456+K10597+K09562+K10666+K08057+K08288+K12670+K09584+K09503+K10601+K07765+K13989+K09481+K13989+K10084+K14026+K08288+K13993+K09518+K09517+K09487+K09540+K14005+K13993+K13249+K10575+K03094+K04523+K09523+K10636+K10839+K05546+K12275+K01230+K06689+K14004+K08852+K01228+…
Photosynthesis - antenna proteins	4	29	0.835979	1	ko00196	Unigene0028031;Unigene0029836;Unigene0047149;Unigene0048720	K08908+K14172+K08912+K08908
Stilbenoid, diarylheptanoid and gingerol biosynthesis	4	30	0.855396	1	ko00945	Unigene0004877;Unigene0035005;Unigene0035487;Unigene0044510	K00588+K13065+K00487+K13065
Biosynthesis of secondary metabolites	334	1820	0.863273	1	ko01110	Unigene0000015;Unigene0000117;Unigene0000172;Unigene0000230;Unigene0000318;Unigene0000651;Unigene0000760;Unigene0000880;Unigene0001077;Unigene0001132;Unigene0001165;Unigene0001314;Unigene0001339;Unigene0001364;Unigene0001498;Unigene0001718;Unigene0001783;Unigene0001796;Unigene0001927;Unigene0001961;Unigene0002286;Unigene0002292;Unigene0002521;Unigene0002616;Unigene0002879;Unigene0002889;Unigene00…	K01733+K01626+K08695+K01590+K00811+K00264+K00873+K11262+K15397+K01662+K12524+K01647+K00281+K00939+K01057+K01810+K01704+K05349+K00547+K01662+K08101+K11778+K01696+K01188+K13606+K00688+K01653+K01580+K09828+K00026+K00162+K00052+K01568+K01803+K01568+K01918+K01904+K00021+K00021+K00422+K00422+K01214+K12502+K00588+K01899+K00167+K05356+K09587+K00106+K01945+K01620+K13519+K01904+K00550+K00939+K00547+K01859+…
Arginine and proline metabolism	18	115	0.864617	1	ko00330	Unigene0000318;Unigene0001541;Unigene0007507;Unigene0018915;Unigene0021427;Unigene0024325;Unigene0024995;Unigene0025518;Unigene0028148;Unigene0036492;Unigene0041048;Unigene0044509;Unigene0045107;Unigene0046305;Unigene0047524;Unigene0047688;Unigene0048853;Unigene0049283	K00811+K17839+K13366+K00286+K00294+K00472+K14454+K00797+K00128+K14455+K10536+K00472+K13427+K00286+K01259+K00472+K00128+K00797
Sesquiterpenoid and triterpenoid biosynthesis	2	17	0.866124	1	ko00909	Unigene0023155;Unigene0030650	K00801+K15891
Butanoate metabolism	6	44	0.874694	1	ko00650	Unigene0002980;Unigene0002997;Unigene0027377;Unigene0028210;Unigene0031244;Unigene0041757	K01653+K01580+K01641+K00074+K18121+K18121
Pyruvate metabolism	35	215	0.885439	1	ko00620	Unigene0000760;Unigene0000880;Unigene0003219;Unigene0003674;Unigene0007648;Unigene0007851;Unigene0008848;Unigene0010073;Unigene0010137;Unigene0010426;Unigene0011867;Unigene0012552;Unigene0012565;Unigene0012925;Unigene0015599;Unigene0016423;Unigene0018804;Unigene0022337;Unigene0024715;Unigene0025248;Unigene0027081;Unigene0028148;Unigene0028479;Unigene0029507;Unigene0033425;Unigene0035188;Unigene00…	K00873+K11262+K00026+K00162+K00873+K01962+K00873+K00016+K01961+K00026+K00051+K18881+K00627+K01512+K01649+K00873+K00026+K01006+K01962+K01913+K00162+K00128+K01679+K00028+K00028+K00029+K00382+K00102+K00627+K01895+K00161+K00873+K00873+K00128+K01595
ABC transporters	6	46	0.900059	1	ko02010	Unigene0000052;Unigene0003707;Unigene0017984;Unigene0025110;Unigene0037281;Unigene0038395	K05658+K05674+K05663+K05655+K05643+K05656
Zeatin biosynthesis	2	19	0.904453	1	ko00908	Unigene0035453;Unigene0048202	K10760+K00791
Pentose phosphate pathway	25	162	0.911887	1	ko00030	Unigene0001498;Unigene0001718;Unigene0004085;Unigene0013406;Unigene0014549;Unigene0018305;Unigene0018446;Unigene0018871;Unigene0021454;Unigene0022143;Unigene0022535;Unigene0023000;Unigene0024213;Unigene0024254;Unigene0025718;Unigene0030275;Unigene0031569;Unigene0038480;Unigene0039373;Unigene0044160;Unigene0044272;Unigene0044604;Unigene0044747;Unigene0047514;Unigene0048625	K01057+K01810+K00131+K00895+K01057+K00852+K00850+K00616+K01835+K00033+K00615+K00036+K01783+K00948+K01623+K03841+K00036+K00616+K03841+K01835+K01807+K03841+K00850+K00033+K00850
Valine, leucine and isoleucine degradation	17	117	0.925256	1	ko00280	Unigene0001751;Unigene0003592;Unigene0004917;Unigene0011131;Unigene0027377;Unigene0028148;Unigene0028580;Unigene0037741;Unigene0039104;Unigene0040244;Unigene0040359;Unigene0044374;Unigene0045140;Unigene0047051;Unigene0047645;Unigene0048637;Unigene0048853	K05605+K05607+K00167+K00826+K01641+K00128+K00826+K00249+K00827+K00382+K00140+K00140+K05605+K09699+K01968+K01969+K00128
Plant hormone signal transduction	45	280	0.926829	1	ko04075	Unigene0000509;Unigene0000720;Unigene0001097;Unigene0001421;Unigene0002158;Unigene0006648;Unigene0006693;Unigene0008376;Unigene0009188;Unigene0009992;Unigene0013729;Unigene0014723;Unigene0015565;Unigene0018734;Unigene0019820;Unigene0022513;Unigene0023289;Unigene0024492;Unigene0024757;Unigene0025423;Unigene0026542;Unigene0027450;Unigene0027686;Unigene0027923;Unigene0028376;Unigene0028702;Unigene00…	K14491+K13415+K14489+K13946+K14431+K14493+K14488+K13464+K14509+K14497+K13464+K14486+K14486+K14488+K14484+K14514+K14485+K14503+K14516+K14508+K14488+K14494+K13464+K14514+K14510+K14484+K14491+K14432+K14432+K13464+K14486+K13422+K14498+K14488+K14488+K13449+K14488+K14432+K14506+K14488+K14491+K14496+K14484+K14431+K14487
alpha-Linolenic acid metabolism	10	76	0.937979	1	ko00592	Unigene0012686;Unigene0013389;Unigene0015035;Unigene0018151;Unigene0023235;Unigene0026358;Unigene0027173;Unigene0036950;Unigene0044967;Unigene0047696	K00232+K00454+K22389+K14674+K00232+K10528+K10526+K10527+K00232+K00232
Fatty acid metabolism	21	145	0.945334	1	ko01212	Unigene0000880;Unigene0005075;Unigene0005459;Unigene0005628;Unigene0007851;Unigene0009658;Unigene0010137;Unigene0012686;Unigene0014060;Unigene0019286;Unigene0021366;Unigene0023235;Unigene0024715;Unigene0028873;Unigene0029069;Unigene0029799;Unigene0036950;Unigene0037741;Unigene0044967;Unigene0045068;Unigene0047696	K11262+K07512+K10781+K01897+K01962+K00648+K01961+K00232+K03921+K10251+K01897+K00232+K01962+K00208+K00645+K01897+K10527+K00249+K00232+K09458+K00232
Plant-pathogen interaction	69	423	0.949477	1	ko04626	Unigene0000051;Unigene0000162;Unigene0000607;Unigene0001077;Unigene0001241;Unigene0001466;Unigene0001504;Unigene0003470;Unigene0004650;Unigene0004706;Unigene0004707;Unigene0004992;Unigene0005173;Unigene0009772;Unigene0010097;Unigene0010412;Unigene0011116;Unigene0011787;Unigene0012012;Unigene0012962;Unigene0013400;Unigene0013848;Unigene0015118;Unigene0016008;Unigene0018358;Unigene0018401;Unigene00…	K13412+K13448+K13420+K15397+K09422+K09422+K09422+K09422+K09422+K13434+K13434+K09487+K09422+K13412+K05391+K09422+K12795+K13424+K09422+K02183+K15397+K09422+K09422+K02358+K20536+K13414+K13457+K13412+K09422+K13448+K13459+K05391+K02358+K09422+K09487+K00864+K09422+K13414+K13412+K09422+K13448+K13412+K13448+K13459+K13448+K09422+K02183+K13448+K05391+K09422+K13448+K13449+K13448+K13448+K09422+K13436+K13448+…
Fatty acid elongation	5	45	0.950685	1	ko00062	Unigene0001077;Unigene0005075;Unigene0008504;Unigene0013400;Unigene0019286	K15397+K07512+K01076+K15397+K10251
Linoleic acid metabolism	2	23	0.95237	1	ko00591	Unigene0013389;Unigene0018151	K00454+K14674
Lysine degradation	14	104	0.952927	1	ko00310	Unigene0000211;Unigene0000271;Unigene0000463;Unigene0003267;Unigene0006089;Unigene0016383;Unigene0021081;Unigene0026982;Unigene0028148;Unigene0031283;Unigene0037082;Unigene0045859;Unigene0047073;Unigene0048853	K11423+K11420+K22748+K11430+K19199+K00658+K11423+K14157+K00128+K11430+K11423+K18826+K19199+K00128
Cutin, suberine and wax biosynthesis	1	15	0.959367	1	ko00073	Unigene0031626	K17991
Cyanoamino acid metabolism	9	74	0.961392	1	ko00460	Unigene0001796;Unigene0002616;Unigene0011686;Unigene0026762;Unigene0031341;Unigene0044828;Unigene0045634;Unigene0046325;Unigene0049357	K05349+K01188+K00600+K01188+K01188+K05349+K05350+K13034+K05349
Glycolysis / Gluconeogenesis	49	317	0.967055	1	ko00010	Unigene0000760;Unigene0001718;Unigene0003674;Unigene0003802;Unigene0004001;Unigene0004085;Unigene0004300;Unigene0007648;Unigene0008848;Unigene0010073;Unigene0012565;Unigene0013406;Unigene0016423;Unigene0018446;Unigene0019633;Unigene0020625;Unigene0021454;Unigene0023609;Unigene0023710;Unigene0024533;Unigene0025248;Unigene0025718;Unigene0027081;Unigene0027211;Unigene0028148;Unigene0030275;Unigene00…	K00873+K01810+K00162+K01568+K01803+K00131+K01568+K00873+K00873+K00016+K00627+K00895+K00873+K00850+K00927+K01689+K01835+K03103+K01792+K01785+K01913+K01623+K00162+K01834+K00128+K03841+K00002+K00134+K01792+K03841+K00844+K00382+K01689+K01835+K03841+K00850+K00627+K01895+K00121+K00121+K00161+K00001+K01834+K01689+K00850+K01792+K00873+K00873+K00128
Carbon fixation in photosynthetic organisms	24	170	0.968135	1	ko00710	Unigene0003219;Unigene0004001;Unigene0010426;Unigene0011867;Unigene0016113;Unigene0018804;Unigene0019633;Unigene0022337;Unigene0022535;Unigene0024213;Unigene0024995;Unigene0025718;Unigene0029507;Unigene0030275;Unigene0033425;Unigene0034023;Unigene0035188;Unigene0035339;Unigene0036492;Unigene0039338;Unigene0039373;Unigene0044272;Unigene0044604;Unigene0049281	K00026+K01803+K00026+K00051+K01601+K00026+K00927+K01006+K00615+K01783+K14454+K01623+K00028+K03841+K00028+K00134+K00029+K00814+K14455+K14272+K03841+K01807+K03841+K01595
Ascorbate and aldarate metabolism	11	89	0.968628	1	ko00053	Unigene0002011;Unigene0022373;Unigene0024913;Unigene0025428;Unigene0028148;Unigene0040050;Unigene0045348;Unigene0046514;Unigene0047328;Unigene0048521;Unigene0048853	K08232+K16190+K00225+K08232+K00128+K14190+K00012+K12447+K00434+K18649+K00128
Phagosome	19	142	0.974614	1	ko04145	Unigene0000690;Unigene0002881;Unigene0009296;Unigene0012616;Unigene0014233;Unigene0017557;Unigene0017726;Unigene0017964;Unigene0018812;Unigene0021381;Unigene0023462;Unigene0026024;Unigene0029951;Unigene0043917;Unigene0043975;Unigene0045192;Unigene0047789;Unigene0048462;Unigene0048782	K00921+K08057+K02145+K08054+K08517+K08057+K02144+K02148+K00914+K09481+K02151+K07374+K02146+K02152+K07375+K02149+K08488+K10956+K02147
Pentose and glucuronate interconversions	15	117	0.975046	1	ko00040	Unigene0001237;Unigene0014446;Unigene0019279;Unigene0022373;Unigene0024213;Unigene0028490;Unigene0029900;Unigene0031598;Unigene0040264;Unigene0044639;Unigene0045348;Unigene0045359;Unigene0045846;Unigene0046316;Unigene0046514	K01728+K01213+K01051+K16190+K01783+K01051+K01805+K00002+K01051+K00008+K00012+K00963+K00963+K01051+K12447
Fatty acid degradation	16	125	0.978682	1	ko00071	Unigene0005628;Unigene0008094;Unigene0012686;Unigene0021366;Unigene0023235;Unigene0028148;Unigene0029799;Unigene0035268;Unigene0036950;Unigene0037741;Unigene0044967;Unigene0046647;Unigene0046974;Unigene0047298;Unigene0047696;Unigene0048853	K01897+K07517+K00232+K01897+K00232+K00128+K01897+K07517+K10527+K00249+K00232+K00121+K00121+K00001+K00232+K00128
Taurine and hypotaurine metabolism	1	19	0.982725	1	ko00430	Unigene0002997	K01580
Peroxisome	29	209	0.983857	1	ko04146	Unigene0004712;Unigene0005266;Unigene0005316;Unigene0005628;Unigene0008404;Unigene0012686;Unigene0017077;Unigene0017776;Unigene0019195;Unigene0021366;Unigene0023235;Unigene0023381;Unigene0026116;Unigene0028453;Unigene0029145;Unigene0029799;Unigene0031543;Unigene0038567;Unigene0039375;Unigene0041045;Unigene0041840;Unigene0043029;Unigene0043352;Unigene0044967;Unigene0045311;Unigene0045854;Unigene00…	K12663+K00106+K13341+K01897+K13337+K00232+K00031+K13348+K13347+K01897+K00232+K13338+K00031+K13346+K13348+K01897+K06664+K01578+K12261+K17879+K00830+K00477+K13339+K00232+K13336+K04564+K13344+K13348+K00232
Glutathione metabolism	20	156	0.987421	1	ko00480	Unigene0000080;Unigene0001567;Unigene0003055;Unigene0008079;Unigene0010883;Unigene0016452;Unigene0017077;Unigene0018368;Unigene0021185;Unigene0022143;Unigene0022243;Unigene0023000;Unigene0025478;Unigene0025518;Unigene0026116;Unigene0027741;Unigene0031569;Unigene0047328;Unigene0047514;Unigene0049283	K21456+K01256+K10807+K01255+K01469+K00432+K00031+K01919+K00799+K00033+K00799+K00036+K10808+K00797+K00031+K00799+K00036+K00434+K00033+K00797
Citrate cycle (TCA cycle)	20	164	0.994176	1	ko00020	Unigene0001314;Unigene0003219;Unigene0003674;Unigene0004897;Unigene0010426;Unigene0012565;Unigene0016383;Unigene0017077;Unigene0017166;Unigene0018804;Unigene0020118;Unigene0020462;Unigene0020464;Unigene0026116;Unigene0027081;Unigene0028479;Unigene0040244;Unigene0044461;Unigene0045582;Unigene0047248	K01647+K00026+K00162+K01899+K00026+K00627+K00658+K00031+K00030+K00026+K01648+K00234+K01647+K00031+K00162+K01679+K00382+K01900+K00627+K00161
MAPK signaling pathway - plant	30	240	0.998098	1	ko04016	Unigene0000049;Unigene0000607;Unigene0003236;Unigene0009019;Unigene0009188;Unigene0009992;Unigene0010567;Unigene0011787;Unigene0012962;Unigene0016587;Unigene0017917;Unigene0018358;Unigene0018401;Unigene0020100;Unigene0020235;Unigene0022513;Unigene0024757;Unigene0025605;Unigene0026923;Unigene0027923;Unigene0028376;Unigene0031304;Unigene0031805;Unigene0032040;Unigene0034905;Unigene0034911;Unigene00…	K20717+K13420+K20726+K20606+K14509+K14497+K17686+K13424+K02183+K20726+K20725+K20536+K13414+K20718+K20714+K14514+K14516+K20538+K13414+K14514+K14510+K20717+K02183+K13422+K14498+K20725+K13449+K14496+K17686+K20553
Biosynthesis of unsaturated fatty acids	6	83	0.999429	1	ko01040	Unigene0012686;Unigene0014060;Unigene0019286;Unigene0023235;Unigene0044967;Unigene0047696	K00232+K03921+K10251+K00232+K00232+K00232
Carbon metabolism	98	670	0.999501	1	ko01200	Unigene0000760;Unigene0001314;Unigene0001339;Unigene0001498;Unigene0001718;Unigene0001751;Unigene0003219;Unigene0003674;Unigene0004001;Unigene0004085;Unigene0004897;Unigene0006278;Unigene0007648;Unigene0007851;Unigene0008848;Unigene0010137;Unigene0010426;Unigene0011686;Unigene0011867;Unigene0012565;Unigene0013189;Unigene0014549;Unigene0016113;Unigene0016383;Unigene0016423;Unigene0017077;Unigene00…	K00873+K01647+K00281+K01057+K01810+K05605+K00026+K00162+K01803+K00131+K01899+K00297+K00873+K01962+K00873+K01961+K00026+K00600+K00051+K00627+K19269+K01057+K01601+K00658+K00873+K00031+K00030+K00640+K00831+K00850+K01938+K00026+K00616+K00927+K00234+K01647+K01689+K00033+K01006+K00615+K00036+K01783+K00948+K01962+K14454+K01913+K01623+K00031+K00162+K01834+K00640+K15918+K01679+K02437+K00028+K03841+K00605+…
Phenylpropanoid biosynthesis	21	208	0.999903	1	ko00940	Unigene0001796;Unigene0002616;Unigene0004447;Unigene0004877;Unigene0005599;Unigene0008939;Unigene0011916;Unigene0013807;Unigene0026762;Unigene0027887;Unigene0028002;Unigene0028734;Unigene0031341;Unigene0035005;Unigene0035154;Unigene0035487;Unigene0039960;Unigene0044510;Unigene0044828;Unigene0045634;Unigene0049357	K05349+K01188+K01904+K00588+K01904+K18368+K00083+K22395+K01188+K01904+K00430+K00430+K01188+K13065+K12356+K00487+K00430+K13065+K05349+K05350+K05349
Glyoxylate and dicarboxylate metabolism	24	231	0.999924	1	ko00630	Unigene0001314;Unigene0001339;Unigene0003219;Unigene0007523;Unigene0010426;Unigene0011686;Unigene0013189;Unigene0016113;Unigene0018804;Unigene0020464;Unigene0020651;Unigene0025248;Unigene0027723;Unigene0029142;Unigene0030621;Unigene0031244;Unigene0039338;Unigene0040244;Unigene0041757;Unigene0041840;Unigene0044572;Unigene0046382;Unigene0046575;Unigene0047583	K01647+K00281+K00026+K01915+K00026+K00600+K19269+K01601+K00026+K01647+K00284+K01913+K15918+K02437+K00605+K18121+K14272+K00382+K18121+K00830+K01433+K01895+K19269+K15919
Oxidative phosphorylation	36	354	0.999999	1	ko00190	Unigene0001311;Unigene0004645;Unigene0007932;Unigene0008061;Unigene0008821;Unigene0009021;Unigene0009296;Unigene0010259;Unigene0010664;Unigene0012166;Unigene0012181;Unigene0014789;Unigene0015965;Unigene0017726;Unigene0017964;Unigene0018184;Unigene0020462;Unigene0022372;Unigene0022459;Unigene0023462;Unigene0023767;Unigene0023925;Unigene0024918;Unigene0026978;Unigene0027941;Unigene0027968;Unigene00…	K01507+K03946+K03953+K03949+K00413+K03934+K02145+K02109+K00411+K02138+K03940+K03879+K02115+K02144+K02148+K00411+K00234+K02132+K03942+K02151+K02135+K02266+K05582+K03955+K00416+K02115+K02146+K02256+K03939+K02111+K02152+K02259+K02149+K02258+K03941+K02147
Tryptophan metabolism	6	146	1	1	ko00380	Unigene0010125;Unigene0016513;Unigene0028148;Unigene0042603;Unigene0048853;Unigene0048958	K11820+K11820+K00128+K22450+K00128+K22450
Ribosome	58	1022	1	1	ko03010	Unigene0000333;Unigene0002896;Unigene0003484;Unigene0003946;Unigene0004909;Unigene0005772;Unigene0006131;Unigene0006600;Unigene0006957;Unigene0007390;Unigene0008068;Unigene0009722;Unigene0010126;Unigene0011085;Unigene0012116;Unigene0012961;Unigene0013048;Unigene0014286;Unigene0014757;Unigene0014759;Unigene0015957;Unigene0016544;Unigene0016660;Unigene0016666;Unigene0017187;Unigene0017607;Unigene00…	K02939+K02882+K02985+K02934+K02984+K02935+K02863+K02896+K02930+K02868+K02940+K02941+K02976+K02989+K02981+K02910+K02887+K02925+K02881+K02881+K02904+K02935+K02871+K02883+K02906+K02902+K02949+K02897+K02974+K02988+K02908+K02864+K02942+K02995+K02896+K02892+K02936+K02872+K02990+K02867+K02906+K02935+K02950+K02975+K02903+K02935+K02930+K02911+K02881+K02921+K02899+K02952+K02946+K02922+K02987+K02923+K02948+…

## Sheet: RB
KEGG analysis result for single-copy genes in Chaenomeles japonica(RB)
Pathway	out (1527)	All (6865)	Pvalue	Qvalue	Pathway ID	Genes	K_IDs
Non-homologous end-joining	8	8	5.90722e-06	0.000762032	ko03450	Unigene0003161;Unigene0005481;Unigene0007968;Unigene0013794;Unigene0016662;Unigene0025923;Unigene0033150;Unigene0047239	K04799+K10885+K10865+K03512+K10866+K10886+K10884+K10777
Purine metabolism	74	231	0.000305226	0.0196871	ko00230	Unigene0000345;Unigene0000348;Unigene0000476;Unigene0000549;Unigene0000740;Unigene0000897;Unigene0001035;Unigene0001530;Unigene0001768;Unigene0002803;Unigene0003826;Unigene0004479;Unigene0004819;Unigene0005585;Unigene0005668;Unigene0005933;Unigene0006322;Unigene0006680;Unigene0008185;Unigene0008228;Unigene0008916;Unigene0009083;Unigene0009182;Unigene0009373;Unigene0010395;Unigene0010917;Unigene00…	K01951+K03010+K00951+K10807+K00951+K02999+K13811+K03006+K01490+K02328+K01514+K00873+K03013+K18447+K03023+K02083+K03025+K00939+K03002+K06928+K14641+K00962+K00939+K03504+K01756+K01490+K01517+K00939+K03005+K01510+K03505+K02326+K03026+K00365+K01939+K01510+K01835+K03015+K03021+K00962+K01513+K03012+K03016+K00764+K00873+K01427+K01488+K00873+K02327+K01952+K03019+K01519+K11808+K14977+K00873+K02335+K13484+…
N-Glycan biosynthesis	24	57	0.000598459	0.0257049	ko00510	Unigene0000600;Unigene0000746;Unigene0004647;Unigene0004781;Unigene0005260;Unigene0009169;Unigene0011247;Unigene0012725;Unigene0013758;Unigene0016111;Unigene0017458;Unigene0019009;Unigene0024002;Unigene0025041;Unigene0025938;Unigene0030358;Unigene0032426;Unigene0036075;Unigene0043018;Unigene0043441;Unigene0044275;Unigene0044553;Unigene0044691;Unigene0045222	K03846+K01228+K00721+K00726+K07151+K03847+K03843+K03849+K12666+K03849+K03842+K05546+K09658+K12670+K00737+K00737+K00729+K01230+K12667+K01231+K00902+K00737+K07432+K03850
Spliceosome	88	292	0.000831499	0.0257049	ko03040	Unigene0000333;Unigene0000451;Unigene0000546;Unigene0000628;Unigene0001532;Unigene0001542;Unigene0002010;Unigene0003372;Unigene0004224;Unigene0004853;Unigene0006102;Unigene0007216;Unigene0007413;Unigene0008267;Unigene0008429;Unigene0009513;Unigene0010098;Unigene0010859;Unigene0011261;Unigene0011877;Unigene0014368;Unigene0015216;Unigene0015373;Unigene0016116;Unigene0016298;Unigene0016882;Unigene00…	K12818+K12821+K12860+K12855+K12867+K12830+K12819+K06063+K12823+K12893+K12896+K12818+K03283+K12843+K11097+K12812+K12890+K12839+K03283+K12896+K12741+K12897+K12813+K11087+K12870+K09564+K12829+K12826+K12850+K12817+K12823+K12828+K12882+K13025+K12741+K12861+K12865+K10599+K12823+K12741+K12857+K12812+K12858+K12880+K11092+K12627+K12741+K12741+K12893+K11094+K12820+K12877+K11099+K12821+K12823+K11088+K12897+…
Ribosome biogenesis in eukaryotes	39	110	0.000996312	0.0257049	ko03008	Unigene0000168;Unigene0000521;Unigene0000796;Unigene0001429;Unigene0002160;Unigene0002285;Unigene0003457;Unigene0004950;Unigene0006619;Unigene0010044;Unigene0010360;Unigene0011767;Unigene0013815;Unigene0016597;Unigene0024744;Unigene0025044;Unigene0025284;Unigene0026176;Unigene0033584;Unigene0035126;Unigene0035382;Unigene0037206;Unigene0037390;Unigene0039272;Unigene0040391;Unigene0040882;Unigene00…	K14548+K14290+K14554+K14573+K14552+K06943+K03538+K14537+K14572+K14558+K14565+K01164+K14536+K14560+K14549+K14574+K14538+K03539+K14550+K14521+K07936+K11108+K14563+K11130+K12619+K14556+K14546+K14561+K03097+K14569+K07562+K14566+K14568+K03537+K14567+K06943+K11131+K14571+K14559
Nucleotide excision repair	37	104	0.00123541	0.0265613	ko03420	Unigene0000369;Unigene0000791;Unigene0001497;Unigene0001911;Unigene0002353;Unigene0002749;Unigene0002803;Unigene0003335;Unigene0003454;Unigene0004887;Unigene0005141;Unigene0005736;Unigene0008606;Unigene0009089;Unigene0009291;Unigene0009373;Unigene0015457;Unigene0015679;Unigene0016957;Unigene0017924;Unigene0025386;Unigene0028847;Unigene0028966;Unigene0034269;Unigene0034744;Unigene0037855;Unigene00…	K10747+K10839+K10609+K10846+K03143+K02202+K02328+K06634+K10747+K10843+K04802+K10848+K10844+K10755+K07466+K03504+K03505+K02326+K10755+K07466+K10755+K10838+K10739+K02327+K10740+K07466+K10756+K10840+K10610+K02335+K10754+K10839+K03506+K03141+K03505+K10841+K07466
Aminoacyl-tRNA biosynthesis	31	88	0.00353171	0.0650844	ko00970	Unigene0000481;Unigene0000483;Unigene0000623;Unigene0001528;Unigene0001580;Unigene0001662;Unigene0001906;Unigene0004241;Unigene0005103;Unigene0007563;Unigene0009284;Unigene0009443;Unigene0010181;Unigene0015351;Unigene0015650;Unigene0017976;Unigene0019315;Unigene0019889;Unigene0022461;Unigene0023690;Unigene0024751;Unigene0024783;Unigene0027083;Unigene0027562;Unigene0029254;Unigene0029763;Unigene00…	K01889+K01869+K01872+K01870+K01868+K01886+K01890+K01876+K01873+K01874+K01872+K01893+K02434+K01883+K01875+K01889+K01867+K01868+K01883+K01869+K01880+K01866+K00604+K01887+K04567+K14164+K01873+K01893+K01881+K01874+K01875
Vitamin B6 metabolism	9	17	0.00547349	0.0722603	ko00750	Unigene0004508;Unigene0007416;Unigene0011960;Unigene0013515;Unigene0017143;Unigene0027968;Unigene0037444;Unigene0040531;Unigene0042239	K00831+K08681+K01733+K06215+K00275+K00868+K00275+K05275+K01733
Proteasome	25	69	0.00553177	0.0722603	ko03050	Unigene0001553;Unigene0002524;Unigene0003610;Unigene0003953;Unigene0008040;Unigene0008131;Unigene0008991;Unigene0010503;Unigene0012752;Unigene0013770;Unigene0015815;Unigene0017896;Unigene0018453;Unigene0024946;Unigene0027224;Unigene0027392;Unigene0029208;Unigene0030481;Unigene0041513;Unigene0041648;Unigene0042456;Unigene0043238;Unigene0043731;Unigene0045900;Unigene0047560	K06699+K02731+K03066+K02727+K03030+K03033+K06691+K03062+K03029+K02739+K02730+K03065+K03039+K03028+K03037+K03063+K06700+K03033+K10881+K02735+K03031+K03036+K03064+K02729+K02726
Mismatch repair	26	73	0.00611687	0.0722603	ko03430	Unigene0000369;Unigene0002803;Unigene0003454;Unigene0003636;Unigene0004614;Unigene0005141;Unigene0009089;Unigene0009291;Unigene0009373;Unigene0015170;Unigene0015457;Unigene0016957;Unigene0017924;Unigene0025020;Unigene0025386;Unigene0028032;Unigene0028966;Unigene0034269;Unigene0034744;Unigene0037855;Unigene0038656;Unigene0040902;Unigene0042825;Unigene0045958;Unigene0046511;Unigene0047496	K10747+K02328+K10747+K07456+K08737+K04802+K10755+K07466+K03504+K03111+K03505+K10755+K07466+K08735+K10755+K08739+K10739+K02327+K10740+K07466+K10756+K08734+K10754+K10858+K03505+K07466
Base excision repair	24	66	0.00616173	0.0722603	ko03410	Unigene0000369;Unigene0002803;Unigene0003052;Unigene0003161;Unigene0003454;Unigene0005141;Unigene0007484;Unigene0008424;Unigene0008933;Unigene0008967;Unigene0009373;Unigene0013794;Unigene0015390;Unigene0015457;Unigene0015679;Unigene0019013;Unigene0027840;Unigene0034269;Unigene0041268;Unigene0044179;Unigene0044801;Unigene0045184;Unigene0046285;Unigene0046511	K10747+K02328+K10773+K04799+K10747+K04802+K01246+K03648+K03575+K10803+K03504+K03512+K01246+K03505+K02326+K10801+K03660+K02327+K02335+K01142+K01247+K03506+K01247+K03505
Metabolic pathways	626	2635	0.00950799	0.102211	ko01100	Unigene0000215;Unigene0000345;Unigene0000348;Unigene0000389;Unigene0000401;Unigene0000409;Unigene0000442;Unigene0000461;Unigene0000464;Unigene0000478;Unigene0000549;Unigene0000560;Unigene0000600;Unigene0000618;Unigene0000685;Unigene0000746;Unigene0000792;Unigene0000801;Unigene0000804;Unigene0000822;Unigene0000883;Unigene0000893;Unigene0000897;Unigene0001035;Unigene0001140;Unigene0001283;Unigene00…	K11262+K01951+K03010+K00036+K00131+K15728+K01190+K03934+K09828+K00763+K10807+K00215+K03846+K00487+K01568+K01228+K12524+K05928+K00225+K00051+K01807+K00514+K02999+K13811+K01662+K01648+K19801+K22389+K01006+K03006+K00888+K00264+K01886+K00921+K01187+K01490+K01057+K04708+K00026+K00422+K00053+K00616+K07541+K01193+K02144+K03861+K02563+K02259+K02293+K00392+K02328+K01934+K04718+K00700+K01431+K00600+K00679+…
Basal transcription factors	20	55	0.0118365	0.117454	ko03022	Unigene0002353;Unigene0002749;Unigene0003335;Unigene0004887;Unigene0004947;Unigene0007438;Unigene0008051;Unigene0008606;Unigene0011515;Unigene0014267;Unigene0021292;Unigene0023695;Unigene0027750;Unigene0031341;Unigene0041358;Unigene0044555;Unigene0046186;Unigene0046289;Unigene0046438;Unigene0046951	K03143+K02202+K06634+K10843+K03138+K03133+K03125+K10844+K03130+K14649+K03124+K03132+K03136+K03123+K03124+K03135+K03141+K03128+K03137+K03129
RNA transport	78	282	0.0170036	0.156676	ko03013	Unigene0000006;Unigene0000460;Unigene0000489;Unigene0000521;Unigene0000673;Unigene0000686;Unigene0002064;Unigene0002387;Unigene0002768;Unigene0003457;Unigene0004025;Unigene0004046;Unigene0005266;Unigene0005491;Unigene0006684;Unigene0006775;Unigene0007283;Unigene0007559;Unigene0008265;Unigene0009513;Unigene0011767;Unigene0011845;Unigene0011946;Unigene0013333;Unigene0013954;Unigene0014606;Unigene00…	K09291+K03254+K14289+K14290+K14327+K03252+K14301+K14300+K13126+K03538+K18213+K14293+K14309+K14292+K14312+K03242+K14315+K05749+K14317+K12812+K01164+K13114+K03248+K14319+K03262+K14318+K14324+K03257+K14298+K03680+K03260+K14304+K12882+K13025+K03236+K12812+K03539+K14305+K03239+K12880+K14326+K00784+K12877+K03243+K14319+K03260+K03260+K14004+K03247+K13126+K12876+K03251+K07936+K03680+K14291+K14321+K14288+…
Terpenoid backbone biosynthesis	22	65	0.0208587	0.168121	ko00900	Unigene0001140;Unigene0002814;Unigene0003094;Unigene0003807;Unigene0004583;Unigene0004774;Unigene0005710;Unigene0014772;Unigene0015258;Unigene0020290;Unigene0021329;Unigene0021835;Unigene0023912;Unigene0027438;Unigene0027688;Unigene0030958;Unigene0038094;Unigene0041723;Unigene0042565;Unigene0043058;Unigene0046508;Unigene0047148	K01662+K06013+K11778+K13789+K01597+K05955+K01641+K11778+K11778+K00919+K00021+K00021+K10960+K05356+K00099+K01823+K00991+K01662+K05906+K13789+K03526+K15891
Folate biosynthesis	12	30	0.0215379	0.168121	ko00790	Unigene0003158;Unigene0004038;Unigene0006427;Unigene0007929;Unigene0011803;Unigene0015830;Unigene0015991;Unigene0040157;Unigene0040505;Unigene0040567;Unigene0041528;Unigene0046087	K01930+K03637+K13998+K18482+K18482+K15631+K20457+K13941+K00079+K15376+K01930+K01724
Galactose metabolism	23	69	0.0221555	0.168121	ko00052	Unigene0000442;Unigene0001670;Unigene0002214;Unigene0004177;Unigene0004814;Unigene0010033;Unigene0012134;Unigene0014821;Unigene0016374;Unigene0017684;Unigene0022574;Unigene0023270;Unigene0024300;Unigene0030151;Unigene0030297;Unigene0039445;Unigene0040450;Unigene0041401;Unigene0042012;Unigene0042529;Unigene0042614;Unigene0043081;Unigene0044543	K01190+K01187+K01193+K06617+K01785+K00963+K06617+K18819+K00850+K00844+K18819+K01835+K12309+K06617+K01784+K00965+K12447+K00963+K00850+K00850+K07407+K06617+K01835
Propanoate metabolism	17	48	0.025438	0.182306	ko00640	Unigene0000215;Unigene0006540;Unigene0009379;Unigene0015713;Unigene0016399;Unigene0016435;Unigene0021988;Unigene0030075;Unigene0030286;Unigene0031997;Unigene0041142;Unigene0042774;Unigene0045860;Unigene0046091;Unigene0046098;Unigene0046413;Unigene0046841	K11262+K00167+K01578+K00140+K01895+K00016+K00382+K05605+K01962+K00140+K01962+K00249+K09699+K01961+K01899+K01900+K05605
One carbon pool by folate	11	28	0.0313097	0.191297	ko00670	Unigene0002242;Unigene0002811;Unigene0003038;Unigene0006427;Unigene0015514;Unigene0017710;Unigene0027083;Unigene0040976;Unigene0041931;Unigene0042828;Unigene0047227	K01433+K01934+K00600+K13998+K00605+K00297+K00604+K01934+K00602+K00288+K01938
Thiamine metabolism	11	28	0.0313097	0.191297	ko00730	Unigene0001140;Unigene0006680;Unigene0008228;Unigene0008690;Unigene0009182;Unigene0009499;Unigene0011397;Unigene0024501;Unigene0040403;Unigene0041723;Unigene0043488	K01662+K00939+K06928+K00949+K00939+K14153+K00939+K00878+K06949+K01662+K00939
Glycosaminoglycan degradation	6	12	0.031909	0.191297	ko00531	Unigene0005506;Unigene0024300;Unigene0030633;Unigene0036156;Unigene0044096;Unigene0046505	K10532+K12309+K10532+K12373+K01205+K07964
Valine, leucine and isoleucine biosynthesis	10	25	0.0346512	0.191297	ko00290	Unigene0002063;Unigene0008505;Unigene0015186;Unigene0024565;Unigene0033562;Unigene0036892;Unigene0042432;Unigene0043313;Unigene0046000;Unigene0046617	K00053+K00826+K01704+K01754+K01649+K00052+K00826+K01687+K01703+K01653
Phenylalanine, tyrosine and tryptophan biosynthesis	20	61	0.037422	0.191297	ko00400	Unigene0003282;Unigene0004290;Unigene0008404;Unigene0011422;Unigene0013309;Unigene0015064;Unigene0017219;Unigene0021249;Unigene0023685;Unigene0024148;Unigene0025578;Unigene0026118;Unigene0027853;Unigene0029135;Unigene0031797;Unigene0035241;Unigene0040608;Unigene0043704;Unigene0043738;Unigene0043747	K14454+K15227+K00817+K00800+K01735+K00811+K15227+K01695+K01817+K14455+K01626+K00815+K01626+K01696+K01626+K01658+K00891+K01657+K01626+K05359
Protein export	20	61	0.037422	0.191297	ko03060	Unigene0000597;Unigene0002968;Unigene0003250;Unigene0003649;Unigene0013035;Unigene0019738;Unigene0021363;Unigene0022076;Unigene0024732;Unigene0026389;Unigene0026967;Unigene0027891;Unigene0029623;Unigene0030177;Unigene0031079;Unigene0034717;Unigene0038964;Unigene0042131;Unigene0045657;Unigene0047408	K13431+K03106+K03217+K03217+K03217+K03070+K03105+K12272+K03107+K12275+K09481+K09647+K03070+K09540+K09648+K03106+K10956+K03070+K03110+K09647
Pyrimidine metabolism	48	170	0.0378294	0.191297	ko00240	Unigene0000348;Unigene0000549;Unigene0000897;Unigene0001530;Unigene0002803;Unigene0003010;Unigene0004819;Unigene0005437;Unigene0005668;Unigene0006322;Unigene0006427;Unigene0008185;Unigene0008916;Unigene0009083;Unigene0009373;Unigene0013974;Unigene0015069;Unigene0015457;Unigene0015679;Unigene0015906;Unigene0016649;Unigene0016811;Unigene0017622;Unigene0021191;Unigene0023130;Unigene0024216;Unigene00…	K03010+K10807+K02999+K03006+K02328+K01431+K03013+K01464+K03023+K03025+K13998+K03002+K14641+K00962+K03504+K03005+K01510+K03505+K02326+K01956+K13800+K00254+K03026+K16329+K01510+K01955+K03015+K03021+K00962+K00876+K01513+K03012+K03016+K02327+K03019+K02335+K10808+K03020+K03787+K01465+K03017+K00609+K03506+K00943+K01081+K03505+K13421+K03024
Biosynthesis of amino acids	96	367	0.0385559	0.191297	ko01230	Unigene0000560;Unigene0000792;Unigene0000883;Unigene0001657;Unigene0002063;Unigene0002089;Unigene0003038;Unigene0003282;Unigene0004290;Unigene0004479;Unigene0004508;Unigene0005387;Unigene0005423;Unigene0005621;Unigene0006768;Unigene0006999;Unigene0007013;Unigene0007447;Unigene0007508;Unigene0008062;Unigene0008404;Unigene0008505;Unigene0010107;Unigene0010254;Unigene0011238;Unigene0011422;Unigene00…	K00215+K12524+K01807+K00264+K00053+K00616+K00600+K14454+K15227+K00873+K00831+K14682+K01689+K01803+K01915+K01783+K14272+K01693+K00286+K01834+K00817+K00826+K00286+K01647+K00927+K00800+K00789+K01733+K01735+K13034+K00811+K01704+K00850+K15227+K00930+K00031+K00031+K01695+K01834+K01817+K14455+K01754+K01626+K00815+K01623+K00814+K01626+K00615+K01696+K01620+K01626+K01739+K00873+K01649+K00873+K00030+K01658+…
Pentose phosphate pathway	25	81	0.0444059	0.212162	ko00030	Unigene0000389;Unigene0000401;Unigene0000883;Unigene0001804;Unigene0002089;Unigene0003656;Unigene0005124;Unigene0006090;Unigene0006908;Unigene0006999;Unigene0007233;Unigene0016374;Unigene0020687;Unigene0023270;Unigene0025070;Unigene0025290;Unigene0026866;Unigene0028233;Unigene0032002;Unigene0039449;Unigene0042012;Unigene0042529;Unigene0044543;Unigene0044568;Unigene0044712	K00036+K00131+K01807+K01057+K00616+K01810+K00852+K00895+K00036+K01783+K03841+K00850+K00033+K01835+K01057+K03841+K01623+K00615+K03841+K00616+K00850+K00850+K01835+K00033+K00948
Selenocompound metabolism	9	23	0.050735	0.225833	ko00450	Unigene0001035;Unigene0007170;Unigene0007563;Unigene0016269;Unigene0031847;Unigene0041575;Unigene0042183;Unigene0043269;Unigene0047269	K13811+K11717+K01874+K01761+K01739+K01760+K01874+K00384+K08247
Amino sugar and nucleotide sugar metabolism	42	149	0.0507687	0.225833	ko00520	Unigene0001444;Unigene0002464;Unigene0003425;Unigene0003656;Unigene0004562;Unigene0005946;Unigene0008045;Unigene0008234;Unigene0010033;Unigene0011378;Unigene0017684;Unigene0020185;Unigene0022407;Unigene0022651;Unigene0022744;Unigene0023270;Unigene0023600;Unigene0023855;Unigene0025029;Unigene0029402;Unigene0030297;Unigene0031086;Unigene0031450;Unigene0034687;Unigene0036156;Unigene0039086;Unigene00…	K01209+K13648+K12448+K01810+K00975+K06118+K00972+K00012+K00963+K08679+K00844+K13648+K13648+K18677+K01711+K01835+K08678+K01836+K13648+K08679+K01784+K16190+K00975+K01183+K12373+K01183+K00965+K15920+K00820+K12447+K00847+K00963+K00326+K13648+K12446+K00847+K05305+K01835+K01183+K00966+K13648+K00326
Glycosylphosphatidylinositol(GPI)-anchor biosynthesis	13	38	0.0615313	0.264585	ko00563	Unigene0002105;Unigene0002287;Unigene0003655;Unigene0003954;Unigene0006305;Unigene0008328;Unigene0013126;Unigene0018360;Unigene0019145;Unigene0023911;Unigene0024002;Unigene0046810;Unigene0046867	K07541+K03861+K03857+K05291+K05284+K05310+K03859+K11001+K05286+K05292+K09658+K03434+K05290
2-Oxocarboxylic acid metabolism	27	93	0.0752026	0.308625	ko01210	Unigene0002063;Unigene0003282;Unigene0005387;Unigene0007013;Unigene0008505;Unigene0010254;Unigene0014975;Unigene0015064;Unigene0015186;Unigene0019165;Unigene0019629;Unigene0021065;Unigene0024148;Unigene0027572;Unigene0028643;Unigene0033562;Unigene0034787;Unigene0036892;Unigene0037601;Unigene0040910;Unigene0041013;Unigene0042432;Unigene0043313;Unigene0044611;Unigene0045572;Unigene0046000;Unigene00…	K00053+K14454+K14682+K14272+K00826+K01647+K11820+K00811+K01704+K00930+K00031+K00031+K14455+K00814+K11820+K01649+K00030+K00052+K14677+K00928+K00818+K00826+K01687+K00145+K01647+K01703+K01653
mRNA surveillance pathway	48	178	0.0765581	0.308625	ko03015	Unigene0000622;Unigene0000673;Unigene0000788;Unigene0002188;Unigene0002768;Unigene0003103;Unigene0003835;Unigene0004898;Unigene0006797;Unigene0007345;Unigene0009513;Unigene0010338;Unigene0011562;Unigene0011845;Unigene0011889;Unigene0012279;Unigene0015962;Unigene0019321;Unigene0020934;Unigene0021653;Unigene0022185;Unigene0025180;Unigene0025889;Unigene0025961;Unigene0026703;Unigene0027887;Unigene00…	K14407+K14327+K03456+K03456+K13126+K14411+K14962+K14399+K06100+K14411+K12812+K11584+K14403+K13114+K14396+K11584+K14324+K14397+K03267+K12882+K13025+K14409+K11583+K12812+K00565+K14326+K12877+K06965+K06100+K13126+K12876+K14416+K14962+K14411+K14376+K13917+K00565+K12875+K14404+K14402+K14401+K14404+K13917+K14400+K14396+K14406+K04382+K13126
Isoquinoline alkaloid biosynthesis	10	29	0.0903354	0.349407	ko00950	Unigene0001973;Unigene0003282;Unigene0015064;Unigene0024148;Unigene0026118;Unigene0031172;Unigene0031173;Unigene0038511;Unigene0041520;Unigene0047355	K00422+K14454+K00811+K14455+K00815+K00422+K00422+K00422+K00422+K00276
RNA degradation	45	168	0.0920918	0.349407	ko03018	Unigene0000556;Unigene0001552;Unigene0001604;Unigene0002768;Unigene0003039;Unigene0005017;Unigene0005343;Unigene0005423;Unigene0005626;Unigene0006997;Unigene0007509;Unigene0009083;Unigene0010023;Unigene0015581;Unigene0016374;Unigene0018041;Unigene0020875;Unigene0027766;Unigene0028598;Unigene0029878;Unigene0033532;Unigene0033963;Unigene0034944;Unigene0035260;Unigene0036353;Unigene0040223;Unigene00…	K12580+K10643+K12604+K13126+K04077+K12587+K12614+K01689+K10643+K12598+K11600+K00962+K12603+K12617+K00850+K12608+K01148+K12627+K00962+K12607+K13126+K12593+K12623+K12591+K04077+K12585+K12616+K12619+K12603+K01689+K12600+K00850+K00850+K12581+K12608+K03681+K12581+K01689+K04077+K12603+K12605+K12598+K03678+K12599+K13126
Arginine biosynthesis	16	52	0.0969527	0.35734	ko00220	Unigene0003282;Unigene0005132;Unigene0005387;Unigene0006768;Unigene0007013;Unigene0013662;Unigene0015064;Unigene0019165;Unigene0024148;Unigene0027572;Unigene0032704;Unigene0037601;Unigene0040104;Unigene0041013;Unigene0044611;Unigene0045321	K14454+K13427+K14682+K01915+K14272+K00262+K00811+K00930+K14455+K00814+K01427+K14677+K01940+K00818+K00145+K00611
Porphyrin and chlorophyll metabolism	19	64	0.101449	0.359607	ko00860	Unigene0002392;Unigene0004405;Unigene0012289;Unigene0019377;Unigene0020348;Unigene0022554;Unigene0023912;Unigene0025793;Unigene0027878;Unigene0028266;Unigene0030413;Unigene0030994;Unigene0031239;Unigene0034457;Unigene0034964;Unigene0041003;Unigene0043688;Unigene0043863;Unigene0047826	K02259+K08099+K04035+K03404+K13606+K01772+K10960+K13071+K00231+K01599+K18010+K08101+K01599+K01772+K13545+K00231+K01749+K04040+K02492
Nicotinate and nicotinamide metabolism	9	26	0.103143	0.359607	ko00760	Unigene0000478;Unigene0008792;Unigene0027795;Unigene0029676;Unigene0040415;Unigene0041354;Unigene0041887;Unigene0043659;Unigene0045652	K00763+K18551+K00858+K01513+K01950+K18551+K00767+K03787+K01081
Monobactam biosynthesis	5	12	0.105956	0.359691	ko00261	Unigene0000560;Unigene0000792;Unigene0001035;Unigene0037794;Unigene0040910	K00215+K12524+K13811+K01714+K00928
Sphingolipid metabolism	11	34	0.11477	0.379625	ko00600	Unigene0000442;Unigene0001924;Unigene0002816;Unigene0011737;Unigene0013926;Unigene0024300;Unigene0033039;Unigene0033279;Unigene0041636;Unigene0042614;Unigene0047513	K01190+K04708+K04718+K04715+K00654+K12309+K17108+K04712+K01634+K07407+K04710
Lysine biosynthesis	6	16	0.12367	0.393903	ko00300	Unigene0000560;Unigene0000792;Unigene0037794;Unigene0040273;Unigene0040910;Unigene0046575	K00215+K12524+K01714+K01586+K00928+K10206
Glycosphingolipid biosynthesis - ganglio series	2	3	0.126377	0.393903	ko00604	Unigene0024300;Unigene0036156	K12309+K12373
Phosphonate and phosphinate metabolism	3	6	0.128247	0.393903	ko00440	Unigene0009271;Unigene0017354;Unigene0042999	K00993+K00968+K00967
Pantothenate and CoA biosynthesis	11	35	0.135383	0.406149	ko00770	Unigene0002063;Unigene0003010;Unigene0005437;Unigene0006361;Unigene0008505;Unigene0029676;Unigene0036830;Unigene0039416;Unigene0042432;Unigene0043313;Unigene0046617	K00053+K01431+K01464+K01918+K00826+K01513+K09680+K06133+K00826+K01687+K01653
Homologous recombination	28	104	0.14992	0.439537	ko03440	Unigene0002803;Unigene0007968;Unigene0009291;Unigene0009373;Unigene0009845;Unigene0010996;Unigene0015170;Unigene0015457;Unigene0016662;Unigene0016687;Unigene0017924;Unigene0021228;Unigene0021480;Unigene0026586;Unigene0027124;Unigene0028966;Unigene0034269;Unigene0034744;Unigene0037855;Unigene0041268;Unigene0041513;Unigene0042170;Unigene0043310;Unigene0043355;Unigene0044888;Unigene0045931;Unigene00…	K02328+K10865+K07466+K03504+K03165+K10867+K03111+K03505+K10866+K11864+K07466+K10875+K10880+K20776+K03165+K10739+K02327+K10740+K07466+K02335+K10881+K10882+K10869+K10728+K10901+K10875+K03505+K07466
Alanine, aspartate and glutamate metabolism	21	76	0.159086	0.454883	ko00250	Unigene0001657;Unigene0003282;Unigene0006768;Unigene0007013;Unigene0010395;Unigene0013662;Unigene0015064;Unigene0015906;Unigene0018954;Unigene0024148;Unigene0024216;Unigene0027572;Unigene0028311;Unigene0032144;Unigene0038494;Unigene0040104;Unigene0040244;Unigene0041102;Unigene0044377;Unigene0045056;Unigene0047417	K00264+K14454+K01915+K14272+K01756+K00262+K00811+K01956+K01939+K14455+K01955+K00814+K13566+K00764+K01580+K01940+K00820+K00827+K00294+K00609+K00830
Autophagy - other eukaryotes	17	60	0.162206	0.454883	ko04136	Unigene0000020;Unigene0000321;Unigene0001063;Unigene0001214;Unigene0002763;Unigene0003530;Unigene0012048;Unigene0034910;Unigene0038519;Unigene0040709;Unigene0042248;Unigene0042822;Unigene0042898;Unigene0044167;Unigene0044590;Unigene0045790;Unigene0047141	K07204+K17906+K08333+K07203+K08341+K17888+K08331+K17606+K08334+K08337+K00914+K08330+K17890+K08269+K08266+K17907+K04382
Carbon metabolism	98	403	0.165763	0.454965	ko01200	Unigene0000389;Unigene0000401;Unigene0000822;Unigene0000883;Unigene0001476;Unigene0001804;Unigene0001945;Unigene0002089;Unigene0003038;Unigene0003135;Unigene0003282;Unigene0003656;Unigene0004479;Unigene0004508;Unigene0005423;Unigene0005621;Unigene0006908;Unigene0006999;Unigene0007013;Unigene0007168;Unigene0007233;Unigene0007330;Unigene0008062;Unigene0008233;Unigene0009621;Unigene0010254;Unigene00…	K00036+K00131+K00051+K01807+K01006+K01057+K00026+K00616+K00600+K19269+K14454+K01810+K00873+K00831+K01689+K01803+K00036+K01783+K14272+K00281+K03841+K19269+K01834+K00029+K00026+K01647+K00927+K00162+K00234+K13034+K00605+K00121+K00140+K02437+K00850+K01895+K00844+K00297+K00028+K00031+K00033+K00031+K00382+K00161+K01834+K14455+K01754+K01057+K00121+K03841+K00627+K01623+K00814+K00615+K01679+K01601+K05605+…
Cysteine and methionine metabolism	34	131	0.176661	0.474775	ko00270	Unigene0000792;Unigene0001945;Unigene0003282;Unigene0007049;Unigene0008505;Unigene0009621;Unigene0010110;Unigene0011558;Unigene0014273;Unigene0014283;Unigene0015064;Unigene0015825;Unigene0015934;Unigene0016269;Unigene0016435;Unigene0019307;Unigene0020515;Unigene0024148;Unigene0026118;Unigene0027555;Unigene0028324;Unigene0030404;Unigene0030500;Unigene0031847;Unigene0035690;Unigene0036524;Unigene00…	K12524+K00026+K14454+K00547+K00826+K00026+K01244+K00789+K13034+K21456+K00811+K00899+K01919+K01761+K00016+K00797+K00547+K14455+K00815+K00547+K01251+K00558+K00026+K01739+K00640+K01011+K00797+K00928+K00827+K01760+K00826+K01738+K16054+K00640
Tyrosine metabolism	16	58	0.202261	0.532482	ko00350	Unigene0001973;Unigene0003282;Unigene0008404;Unigene0015064;Unigene0015671;Unigene0024148;Unigene0025114;Unigene0026118;Unigene0031172;Unigene0031173;Unigene0038511;Unigene0041213;Unigene0041520;Unigene0042156;Unigene0044236;Unigene0047355	K00422+K14454+K00817+K00811+K00121+K14455+K00121+K00815+K00422+K00422+K00422+K00001+K00422+K01555+K00451+K00276
Caffeine metabolism	2	4	0.216121	0.557592	ko00232	Unigene0018362;Unigene0047434	K00365+K00106
Glycerolipid metabolism	29	114	0.23466	0.583056	ko00561	Unigene0000409;Unigene0003079;Unigene0005291;Unigene0005946;Unigene0006034;Unigene0009388;Unigene0009860;Unigene0014759;Unigene0015073;Unigene0015481;Unigene0020849;Unigene0021144;Unigene0021263;Unigene0021712;Unigene0026857;Unigene0028408;Unigene0028768;Unigene0029887;Unigene0031048;Unigene0037272;Unigene0038114;Unigene0039481;Unigene0040449;Unigene0040544;Unigene0040950;Unigene0041501;Unigene00…	K15728+K00679+K01054+K06118+K21362+K01054+K00901+K13513+K13519+K00128+K14674+K13523+K00128+K01054+K00630+K22848+K09480+K01054+K13508+K03715+K06119+K18693+K00863+K15918+K00864+K00002+K09480+K07407+K00655
Sulfur metabolism	11	39	0.23503	0.583056	ko00920	Unigene0001035;Unigene0002594;Unigene0008292;Unigene0014273;Unigene0031847;Unigene0035690;Unigene0036524;Unigene0036934;Unigene0040946;Unigene0043506;Unigene0046749	K13811+K00392+K00387+K13034+K01739+K00640+K01011+K15422+K05907+K01738+K00640
Peroxisome	29	115	0.250919	0.610726	ko04146	Unigene0003476;Unigene0006800;Unigene0008211;Unigene0009379;Unigene0010884;Unigene0011572;Unigene0014471;Unigene0014615;Unigene0017758;Unigene0019629;Unigene0021065;Unigene0022428;Unigene0024030;Unigene0027491;Unigene0035749;Unigene0035763;Unigene0036423;Unigene0041551;Unigene0041624;Unigene0041861;Unigene0042725;Unigene0044051;Unigene0045178;Unigene0045221;Unigene0046786;Unigene0047062;Unigene00…	K13347+K13346+K17879+K01578+K13348+K12261+K13348+K12663+K01897+K00031+K00031+K13339+K13348+K00232+K00477+K13341+K13337+K01897+K00232+K13344+K00232+K06664+K04564+K13336+K00232+K01897+K13338+K00830+K00106
Sulfur relay system	5	16	0.273178	0.64008	ko04122	Unigene0004038;Unigene0007150;Unigene0025844;Unigene0036524;Unigene0042567	K03637+K11996+K12161+K01011+K14168
Other glycan degradation	7	24	0.273935	0.64008	ko00511	Unigene0000442;Unigene0008008;Unigene0024300;Unigene0026635;Unigene0033039;Unigene0036156;Unigene0043981	K01190+K01227+K12309+K01206+K17108+K12373+K01444
Glycine, serine and threonine metabolism	23	91	0.278192	0.64008	ko00260	Unigene0000792;Unigene0003038;Unigene0004508;Unigene0007013;Unigene0007168;Unigene0008062;Unigene0011960;Unigene0015514;Unigene0016196;Unigene0021249;Unigene0021988;Unigene0022964;Unigene0024565;Unigene0029135;Unigene0031282;Unigene0035486;Unigene0040544;Unigene0040910;Unigene0041102;Unigene0042239;Unigene0044180;Unigene0047355;Unigene0047417	K12524+K00600+K00831+K14272+K00281+K01834+K01733+K00605+K02437+K01695+K00382+K01834+K01754+K01696+K01620+K00130+K15918+K00928+K00827+K01733+K15919+K00276+K00830
Fructose and mannose metabolism	22	87	0.283245	0.64008	ko00051	Unigene0005585;Unigene0005621;Unigene0006090;Unigene0007233;Unigene0013291;Unigene0016374;Unigene0017684;Unigene0020658;Unigene0022744;Unigene0025290;Unigene0026866;Unigene0031695;Unigene0032002;Unigene0040449;Unigene0040543;Unigene0041295;Unigene0042012;Unigene0042529;Unigene0043160;Unigene0043233;Unigene0046789;Unigene0047599	K18447+K01803+K00895+K03841+K19355+K00850+K00844+K01103+K01711+K03841+K01623+K19355+K03841+K00863+K00847+K01805+K00850+K00850+K00847+K05305+K00008+K00966
beta-Alanine metabolism	17	66	0.287788	0.64008	ko00410	Unigene0003010;Unigene0005437;Unigene0006361;Unigene0009379;Unigene0013577;Unigene0015481;Unigene0015713;Unigene0019307;Unigene0021263;Unigene0030075;Unigene0031997;Unigene0038494;Unigene0039966;Unigene0042010;Unigene0042774;Unigene0046841;Unigene0047355	K01431+K01464+K01918+K01578+K13366+K00128+K00140+K00797+K00128+K05605+K00140+K01580+K00797+K17839+K00249+K05605+K00276
DNA replication	25	101	0.306244	0.669585	ko03030	Unigene0000369;Unigene0002803;Unigene0003161;Unigene0003454;Unigene0005141;Unigene0009089;Unigene0009291;Unigene0009373;Unigene0015170;Unigene0015457;Unigene0015679;Unigene0016957;Unigene0017924;Unigene0025386;Unigene0028966;Unigene0031924;Unigene0034269;Unigene0034744;Unigene0037855;Unigene0038656;Unigene0041268;Unigene0042825;Unigene0045184;Unigene0046511;Unigene0047496	K10747+K02328+K04799+K10747+K04802+K10755+K07466+K03504+K03111+K03505+K02326+K10755+K07466+K10755+K10739+K10743+K02327+K10740+K07466+K10756+K02335+K10754+K03506+K03505+K07466
Histidine metabolism	10	38	0.330322	0.710192	ko00340	Unigene0007447;Unigene0008404;Unigene0015481;Unigene0021263;Unigene0041574;Unigene0043627;Unigene0043743;Unigene0044261;Unigene0044447;Unigene0046655	K01693+K00817+K00128+K00128+K00765+K01590+K01814+K01663+K11755+K18649
Glycolysis / Gluconeogenesis	49	209	0.362177	0.759478	ko00010	Unigene0000401;Unigene0000685;Unigene0003527;Unigene0003656;Unigene0004479;Unigene0004814;Unigene0005423;Unigene0005621;Unigene0006090;Unigene0007233;Unigene0008062;Unigene0011238;Unigene0011526;Unigene0015481;Unigene0015671;Unigene0016374;Unigene0016399;Unigene0016435;Unigene0017684;Unigene0021263;Unigene0021988;Unigene0022243;Unigene0022964;Unigene0023270;Unigene0025114;Unigene0025290;Unigene00…	K00131+K01568+K01792+K01810+K00873+K01785+K01689+K01803+K00895+K03841+K01834+K00927+K00162+K00128+K00121+K00850+K01895+K00016+K00844+K00128+K00382+K00161+K01834+K01835+K00121+K03841+K00627+K01623+K01792+K01792+K03841+K00873+K00873+K01568+K01689+K00873+K00001+K00002+K00850+K00850+K03103+K00873+K00873+K00134+K01689+K01835+K01913+K00162+K00627
Brassinosteroid biosynthesis	5	18	0.370908	0.759478	ko00905	Unigene0006473;Unigene0006815;Unigene0015060;Unigene0016418;Unigene0027404	K12637+K20623+K09587+K09590+K09591
Glucosinolate biosynthesis	5	18	0.370908	0.759478	ko00966	Unigene0008505;Unigene0014975;Unigene0028643;Unigene0042432;Unigene0046000	K00826+K11820+K11820+K00826+K01703
Citrate cycle (TCA cycle)	20	83	0.383001	0.763868	ko00020	Unigene0001283;Unigene0001945;Unigene0009621;Unigene0010254;Unigene0011526;Unigene0011905;Unigene0019629;Unigene0021065;Unigene0021988;Unigene0022243;Unigene0026029;Unigene0028978;Unigene0030500;Unigene0034787;Unigene0045572;Unigene0046098;Unigene0046413;Unigene0046672;Unigene0046716;Unigene0047276	K01648+K00026+K00026+K01647+K00162+K00234+K00031+K00031+K00382+K00161+K00627+K01679+K00026+K00030+K01647+K01899+K01900+K00658+K00162+K00627
Valine, leucine and isoleucine degradation	17	70	0.384895	0.763868	ko00280	Unigene0004356;Unigene0005710;Unigene0006540;Unigene0008505;Unigene0015481;Unigene0015713;Unigene0021263;Unigene0021988;Unigene0030075;Unigene0031997;Unigene0041102;Unigene0042432;Unigene0042774;Unigene0045833;Unigene0045860;Unigene0046228;Unigene0046841	K05607+K01641+K00167+K00826+K00128+K00140+K00128+K00382+K05605+K00140+K00827+K00826+K00249+K01969+K09699+K01968+K05605
RNA polymerase	17	72	0.435095	0.835652	ko03020	Unigene0000348;Unigene0000897;Unigene0001530;Unigene0004819;Unigene0005668;Unigene0006322;Unigene0008185;Unigene0013974;Unigene0017622;Unigene0025739;Unigene0027751;Unigene0030544;Unigene0031034;Unigene0036293;Unigene0043027;Unigene0044751;Unigene0047123	K03010+K02999+K03006+K03013+K03023+K03025+K03002+K03005+K03026+K03015+K03021+K03012+K03016+K03019+K03020+K03017+K03024
C5-Branched dibasic acid metabolism	4	15	0.436596	0.835652	ko00660	Unigene0015186;Unigene0036892;Unigene0046000;Unigene0046617	K01704+K00052+K01703+K01653
Biosynthesis of secondary metabolites	334	1490	0.440499	0.835652	ko01110	Unigene0000215;Unigene0000389;Unigene0000409;Unigene0000464;Unigene0000560;Unigene0000618;Unigene0000685;Unigene0000792;Unigene0000801;Unigene0000804;Unigene0000883;Unigene0000893;Unigene0001140;Unigene0001161;Unigene0001283;Unigene0001460;Unigene0001657;Unigene0001768;Unigene0001804;Unigene0001945;Unigene0001973;Unigene0002063;Unigene0002089;Unigene0002392;Unigene0002581;Unigene0002869;Unigene00…	K11262+K00036+K15728+K09828+K00215+K00487+K01568+K12524+K05928+K00225+K01807+K00514+K01662+K21371+K01648+K22389+K00264+K01490+K01057+K00026+K00422+K00053+K00616+K02259+K02293+K00700+K00600+K11778+K19269+K14454+K00227+K01792+K01810+K10760+K13789+K14190+K01613+K15227+K08099+K00873+K00975+K01597+K11752+K22395+K01785+K10528+K13427+K14682+K01689+K18447+K01803+K01641+K00895+K01918+K05349+K09837+K12637+…
Tropane, piperidine and pyridine alkaloid biosynthesis	7	29	0.474503	0.860345	ko00960	Unigene0003282;Unigene0008404;Unigene0015064;Unigene0024148;Unigene0026118;Unigene0043389;Unigene0047355	K14454+K00817+K00811+K14455+K00815+K08081+K00276
Carotenoid biosynthesis	9	38	0.478101	0.860345	ko00906	Unigene0000893;Unigene0002581;Unigene0006421;Unigene0017988;Unigene0026806;Unigene0027667;Unigene0032229;Unigene0034528;Unigene0039652	K00514+K02293+K09837+K09841+K06443+K09840+K09843+K06444+K09835
Fatty acid biosynthesis	13	56	0.482536	0.860345	ko00061	Unigene0000215;Unigene0003547;Unigene0012022;Unigene0017758;Unigene0030286;Unigene0032069;Unigene0040818;Unigene0041142;Unigene0041409;Unigene0041457;Unigene0041551;Unigene0046091;Unigene0047062	K11262+K10781+K03921+K01897+K01962+K09458+K00208+K01962+K00645+K00648+K01897+K01961+K01897
Pyruvate metabolism	35	155	0.4913	0.860345	ko00620	Unigene0000215;Unigene0000822;Unigene0001476;Unigene0001945;Unigene0004479;Unigene0008233;Unigene0009621;Unigene0011526;Unigene0015481;Unigene0016399;Unigene0016435;Unigene0018563;Unigene0021103;Unigene0021263;Unigene0021988;Unigene0022243;Unigene0026029;Unigene0028978;Unigene0030286;Unigene0030500;Unigene0032598;Unigene0033375;Unigene0033562;Unigene0034065;Unigene0038545;Unigene0040661;Unigene00…	K11262+K00051+K01006+K00026+K00873+K00029+K00026+K00162+K00128+K01895+K00016+K00028+K00102+K00128+K00382+K00161+K00627+K01679+K01962+K00026+K00873+K00028+K01649+K00873+K01512+K18881+K00873+K01962+K01595+K00873+K00873+K01913+K01961+K00162+K00627
Arachidonic acid metabolism	6	25	0.493532	0.860345	ko00590	Unigene0020591;Unigene0020849;Unigene0028139;Unigene0028390;Unigene0039730;Unigene0040505	K00432+K14674+K01254+K05309+K15730+K00079
Riboflavin metabolism	6	25	0.493532	0.860345	ko00740	Unigene0004700;Unigene0011940;Unigene0012517;Unigene0027733;Unigene0029676;Unigene0042323	K11752+K11752+K00794+K14379+K01513+K18453
Ubiquinone and other terpenoid-quinone biosynthesis	13	58	0.539104	0.920306	ko00130	Unigene0000618;Unigene0000801;Unigene0011622;Unigene0020571;Unigene0021277;Unigene0025428;Unigene0026118;Unigene0028376;Unigene0033732;Unigene0035922;Unigene0040362;Unigene0041628;Unigene0045508	K00487+K05928+K01904+K12502+K01904+K03809+K00815+K01904+K03809+K06127+K06126+K00591+K14760
SNARE interactions in vesicular transport	11	49	0.542196	0.920306	ko04130	Unigene0004319;Unigene0006183;Unigene0007069;Unigene0014548;Unigene0019654;Unigene0022645;Unigene0028285;Unigene0033273;Unigene0036148;Unigene0046472;Unigene0046473	K08517+K08515+K08503+K08490+K08490+K08486+K08515+K08495+K08496+K08488+K08488
Steroid biosynthesis	8	36	0.566412	0.933778	ko00100	Unigene0000464;Unigene0003331;Unigene0007261;Unigene0020849;Unigene0026101;Unigene0027460;Unigene0040863;Unigene0041536	K09828+K00227+K08246+K14674+K01824+K07748+K00222+K00801
Ubiquitin mediated proteolysis	39	178	0.572999	0.933778	ko04120	Unigene0000934;Unigene0001383;Unigene0001497;Unigene0002252;Unigene0004318;Unigene0005956;Unigene0008652;Unigene0009173;Unigene0009175;Unigene0009358;Unigene0012181;Unigene0013817;Unigene0014091;Unigene0016058;Unigene0016534;Unigene0017414;Unigene0017814;Unigene0019759;Unigene0020220;Unigene0021826;Unigene0024626;Unigene0024639;Unigene0024962;Unigene0028649;Unigene0032749;Unigene0035171;Unigene00…	K10581+K10589+K10609+K10573+K03364+K10143+K04506+K03094+K03094+K10575+K03349+K10604+K10601+K10597+K03354+K10604+K10590+K10144+K10144+K04506+K10598+K10599+K03354+K06689+K06688+K20217+K10685+K03351+K03094+K03353+K10610+K10686+K04506+K03363+K03355+K03350+K03357+K10588+K10580
Butanoate metabolism	6	27	0.576134	0.933778	ko00650	Unigene0005710;Unigene0036129;Unigene0038494;Unigene0043038;Unigene0043252;Unigene0046617	K01641+K00074+K01580+K18121+K18121+K01653
Nitrogen metabolism	9	41	0.579087	0.933778	ko00910	Unigene0001657;Unigene0006768;Unigene0007236;Unigene0011932;Unigene0012123;Unigene0013662;Unigene0013712;Unigene0043174;Unigene0044239	K00264+K01915+K01673+K01673+K00284+K00262+K02575+K00366+K01673
Photosynthesis	15	69	0.587529	0.935694	ko00195	Unigene0004736;Unigene0008367;Unigene0008888;Unigene0011286;Unigene0019229;Unigene0025478;Unigene0028407;Unigene0030672;Unigene0032516;Unigene0039410;Unigene0040206;Unigene0041417;Unigene0041836;Unigene0042333;Unigene0042688	K02109+K02639+K02111+K08901+K02635+K02115+K02703+K02694+K02695+K02705+K08901+K02639+K02115+K08906+K02639
Photosynthesis - antenna proteins	4	19	0.638363	0.980256	ko00196	Unigene0005605;Unigene0012035;Unigene0012207;Unigene0031163	K14172+K08912+K08908+K08908
Other types of O-glycan biosynthesis	4	19	0.638363	0.980256	ko00514	Unigene0009047;Unigene0016081;Unigene0028383;Unigene0035359	K09667+K20782+K09667+K20784
Biotin metabolism	5	24	0.644839	0.980256	ko00780	Unigene0010484;Unigene0012331;Unigene0032069;Unigene0040818;Unigene0041918	K19562+K00652+K09458+K00208+K01012
Inositol phosphate metabolism	21	100	0.656824	0.980256	ko00562	Unigene0001443;Unigene0001558;Unigene0001668;Unigene0005621;Unigene0008489;Unigene0015713;Unigene0018779;Unigene0029424;Unigene0031092;Unigene0031997;Unigene0035244;Unigene0036934;Unigene0037558;Unigene0040465;Unigene0040923;Unigene0042204;Unigene0042248;Unigene0042981;Unigene0044618;Unigene0045884;Unigene0046655	K19801+K00888+K00921+K01803+K05857+K00140+K00913+K01858+K01765+K00140+K00915+K15422+K01092+K00913+K00889+K10572+K00914+K03103+K01114+K01114+K18649
Fatty acid degradation	16	77	0.66558	0.980256	ko00071	Unigene0015481;Unigene0015671;Unigene0017758;Unigene0021263;Unigene0025114;Unigene0027491;Unigene0031555;Unigene0035428;Unigene0035464;Unigene0041213;Unigene0041551;Unigene0041624;Unigene0042725;Unigene0042774;Unigene0046786;Unigene0047062	K00128+K00121+K01897+K00128+K00121+K00232+K07517+K07517+K10527+K00001+K01897+K00232+K00232+K00249+K00232+K01897
Carbon fixation in photosynthetic organisms	24	115	0.675102	0.980256	ko00710	Unigene0000822;Unigene0000883;Unigene0001476;Unigene0001945;Unigene0003282;Unigene0005621;Unigene0006999;Unigene0007013;Unigene0007233;Unigene0008233;Unigene0009621;Unigene0011238;Unigene0018563;Unigene0024148;Unigene0025290;Unigene0026866;Unigene0027572;Unigene0028233;Unigene0029727;Unigene0030500;Unigene0032002;Unigene0033375;Unigene0043490;Unigene0044217	K00051+K01807+K01006+K00026+K14454+K01803+K01783+K14272+K03841+K00029+K00026+K00927+K00028+K14455+K03841+K01623+K00814+K00615+K01601+K00026+K03841+K00028+K01595+K00134
Fatty acid metabolism	21	101	0.675968	0.980256	ko01212	Unigene0000215;Unigene0003547;Unigene0012022;Unigene0017758;Unigene0027225;Unigene0027491;Unigene0030286;Unigene0032069;Unigene0035464;Unigene0040638;Unigene0040818;Unigene0041142;Unigene0041409;Unigene0041457;Unigene0041551;Unigene0041624;Unigene0042725;Unigene0042774;Unigene0046091;Unigene0046786;Unigene0047062	K11262+K10781+K03921+K01897+K07512+K00232+K01962+K09458+K10527+K10251+K00208+K01962+K00645+K00648+K01897+K00232+K00232+K00249+K01961+K00232+K01897
Circadian rhythm - plant	11	54	0.681801	0.980256	ko04712	Unigene0000393;Unigene0000410;Unigene0005956;Unigene0029371;Unigene0034362;Unigene0034848;Unigene0039829;Unigene0042345;Unigene0042992;Unigene0045853;Unigene0047489	K12129+K12127+K10143+K12115+K12124+K16221+K12119+K03097+K12130+K16240+K12118
Glycosphingolipid biosynthesis - globo and isoglobo series	2	10	0.688279	0.980256	ko00603	Unigene0036156;Unigene0042614	K12373+K07407
Glycerophospholipid metabolism	27	130	0.691498	0.980256	ko00564	Unigene0000409;Unigene0001460;Unigene0004238;Unigene0009271;Unigene0009860;Unigene0009863;Unigene0011330;Unigene0011632;Unigene0014759;Unigene0015073;Unigene0017354;Unigene0020849;Unigene0021144;Unigene0021170;Unigene0022800;Unigene0026857;Unigene0031048;Unigene0032412;Unigene0032979;Unigene0038583;Unigene0039481;Unigene0041654;Unigene0042999;Unigene0044618;Unigene0045328;Unigene0045884;Unigene00…	K15728+K22389+K01613+K00993+K00901+K06130+K01517+K00550+K13513+K13519+K00968+K14674+K13523+K05929+K00995+K00630+K13508+K00981+K01613+K01115+K18693+K08730+K00967+K01114+K00981+K01114+K00655
Synthesis and degradation of ketone bodies	1	5	0.715875	0.992988	ko00072	Unigene0005710	K01641
Flavone and flavonol biosynthesis	1	5	0.715875	0.992988	ko00944	Unigene0041972	K05280
Glyoxylate and dicarboxylate metabolism	24	120	0.756987	1	ko00630	Unigene0001945;Unigene0002242;Unigene0003038;Unigene0003135;Unigene0006768;Unigene0007013;Unigene0007168;Unigene0007330;Unigene0009621;Unigene0010254;Unigene0012123;Unigene0015514;Unigene0016196;Unigene0016399;Unigene0021988;Unigene0029727;Unigene0030500;Unigene0040544;Unigene0043038;Unigene0043252;Unigene0044180;Unigene0045572;Unigene0045738;Unigene0047417	K00026+K01433+K00600+K19269+K01915+K14272+K00281+K19269+K00026+K01647+K00284+K00605+K02437+K01895+K00382+K01601+K00026+K15918+K18121+K18121+K15919+K01647+K01913+K00830
Lipoic acid metabolism	1	6	0.77912	1	ko00785	Unigene0019528	K03644
Indole alkaloid biosynthesis	1	6	0.77912	1	ko00901	Unigene0011452	K21026
Phosphatidylinositol signaling system	19	102	0.842666	1	ko04070	Unigene0001443;Unigene0001558;Unigene0001668;Unigene0008489;Unigene0009860;Unigene0018779;Unigene0028358;Unigene0032412;Unigene0035142;Unigene0035244;Unigene0036934;Unigene0037558;Unigene0040388;Unigene0040465;Unigene0040923;Unigene0042204;Unigene0042248;Unigene0045328;Unigene0046655	K19801+K00888+K00921+K05857+K00901+K00913+K02183+K00981+K13024+K00915+K15422+K01092+K02183+K00913+K00889+K10572+K00914+K00981+K18649
Arginine and proline metabolism	18	98	0.85426	1	ko00330	Unigene0003282;Unigene0003850;Unigene0005132;Unigene0007508;Unigene0010107;Unigene0013577;Unigene0013677;Unigene0015064;Unigene0015481;Unigene0019307;Unigene0020276;Unigene0021263;Unigene0024148;Unigene0036254;Unigene0039966;Unigene0042010;Unigene0044377;Unigene0046172	K14454+K00472+K13427+K00286+K00286+K13366+K00472+K00811+K00128+K00797+K01259+K00128+K14455+K10536+K00797+K17839+K00294+K00472
Flavonoid biosynthesis	10	58	0.861044	1	ko00941	Unigene0000618;Unigene0008453;Unigene0011354;Unigene0016168;Unigene0026418;Unigene0029750;Unigene0030192;Unigene0038050;Unigene0041972;Unigene0045483	K00487+K13065+K13082+K08695+K00475+K00588+K13065+K01859+K05280+K05278
Protein processing in endoplasmic reticulum	72	359	0.862418	1	ko04141	Unigene0000590;Unigene0000746;Unigene0000791;Unigene0001062;Unigene0001145;Unigene0003836;Unigene0005224;Unigene0005260;Unigene0005855;Unigene0005872;Unigene0006016;Unigene0006199;Unigene0007266;Unigene0007413;Unigene0008181;Unigene0009173;Unigene0009175;Unigene0009358;Unigene0009418;Unigene0010036;Unigene0011261;Unigene0012514;Unigene0012615;Unigene0013758;Unigene0014091;Unigene0014413;Unigene00…	K10636+K01228+K10839+K14005+K08653+K08288+K09518+K07151+K13993+K14026+K09487+K14011+K13993+K03283+K07765+K03094+K03094+K10575+K08288+K11718+K03283+K09487+K13993+K12666+K10601+K14007+K09562+K08054+K10597+K08057+K05546+K09580+K13989+K13989+K14018+K12670+K10661+K12275+K10666+K09481+K09517+K08852+K06689+K09540+K10085+K14004+K14016+K01230+K01456+K03094+K09503+K10956+K10666+K08057+K13249+K10084+K09580+…
Oxidative phosphorylation	37	192	0.863482	1	ko00190	Unigene0000461;Unigene0002275;Unigene0002392;Unigene0004291;Unigene0004324;Unigene0004537;Unigene0004736;Unigene0007516;Unigene0008730;Unigene0008888;Unigene0010925;Unigene0011905;Unigene0012010;Unigene0013633;Unigene0013788;Unigene0016968;Unigene0022160;Unigene0022330;Unigene0022767;Unigene0024574;Unigene0025478;Unigene0030655;Unigene0030992;Unigene0032911;Unigene0033951;Unigene0040255;Unigene00…	K03934+K02144+K02259+K03955+K03955+K02256+K02109+K02152+K03940+K02111+K03879+K00234+K02258+K05582+K03949+K02132+K02147+K00411+K00411+K03942+K02115+K02266+K02146+K03946+K03941+K03953+K00413+K02115+K02135+K01507+K00416+K02149+K02145+K02148+K03939+K02138+K02151
Starch and sucrose metabolism	35	183	0.869204	1	ko00500	Unigene0001670;Unigene0002214;Unigene0002869;Unigene0003656;Unigene0004562;Unigene0005585;Unigene0006407;Unigene0008552;Unigene0009018;Unigene0009846;Unigene0010033;Unigene0015805;Unigene0017684;Unigene0018865;Unigene0020452;Unigene0023270;Unigene0023579;Unigene0029676;Unigene0030957;Unigene0031450;Unigene0031572;Unigene0032713;Unigene0035561;Unigene0037136;Unigene0037746;Unigene0040543;Unigene00…	K01187+K01193+K00700+K01810+K00975+K18447+K05349+K01188+K01188+K05349+K00963+K00688+K00844+K01188+K01176+K01835+K00705+K01513+K00700+K00975+K00705+K00703+K05350+K00700+K01214+K00847+K00963+K01214+K13679+K19893+K00847+K01835+K00703+K05349+K01194
Endocytosis	49	252	0.879212	1	ko04144	Unigene0000669;Unigene0001391;Unigene0006358;Unigene0007116;Unigene0007413;Unigene0008699;Unigene0011072;Unigene0011261;Unigene0011707;Unigene0015189;Unigene0017997;Unigene0018094;Unigene0018175;Unigene0018460;Unigene0020031;Unigene0021971;Unigene0022663;Unigene0022886;Unigene0025724;Unigene0025976;Unigene0027469;Unigene0027931;Unigene0028663;Unigene0030401;Unigene0030682;Unigene0035482;Unigene00…	K12479+K12471+K10365+K12486+K03283+K19476+K12198+K03283+K11826+K19366+K12195+K07904+K12196+K12200+K12190+K18466+K10396+K12191+K12471+K12486+K11827+K07904+K12489+K07904+K12197+K05756+K07904+K12189+K12486+K01115+K19366+K15053+K11824+K10364+K12489+K00889+K03283+K03283+K05758+K19476+K11866+K05757+K19476+K07937+K12185+K12193+K05755+K01528+K07904
Phenylalanine metabolism	12	71	0.894014	1	ko00360	Unigene0000618;Unigene0003282;Unigene0008404;Unigene0011622;Unigene0015064;Unigene0021277;Unigene0024148;Unigene0026118;Unigene0028376;Unigene0029750;Unigene0036129;Unigene0047355	K00487+K14454+K00817+K01904+K00811+K01904+K14455+K00815+K01904+K00588+K00074+K00276
Zeatin biosynthesis	2	16	0.90068	1	ko00908	Unigene0003715;Unigene0006921	K10760+K00791
Glutathione metabolism	20	113	0.903378	1	ko00480	Unigene0000389;Unigene0000549;Unigene0003300;Unigene0006908;Unigene0014283;Unigene0015934;Unigene0019307;Unigene0019629;Unigene0020591;Unigene0020687;Unigene0021065;Unigene0029581;Unigene0030527;Unigene0039819;Unigene0039966;Unigene0041304;Unigene0041659;Unigene0042144;Unigene0042753;Unigene0044568	K00036+K10807+K00799+K00036+K21456+K01919+K00797+K00031+K00432+K00033+K00031+K01256+K00434+K00799+K00797+K01469+K00799+K01255+K10808+K00033
Ether lipid metabolism	6	40	0.907756	1	ko00565	Unigene0009271;Unigene0015073;Unigene0020849;Unigene0038583;Unigene0044618;Unigene0045884	K00993+K13519+K14674+K01115+K01114+K01114
Stilbenoid, diarylheptanoid and gingerol biosynthesis	4	29	0.9136	1	ko00945	Unigene0000618;Unigene0008453;Unigene0029750;Unigene0030192	K00487+K13065+K00588+K13065
Sesquiterpenoid and triterpenoid biosynthesis	2	17	0.91885	1	ko00909	Unigene0041536;Unigene0047148	K00801+K15891
Monoterpenoid biosynthesis	1	10	0.919357	1	ko00902	Unigene0031203	K15095
Lysine degradation	13	81	0.935572	1	ko00310	Unigene0000354;Unigene0000359;Unigene0000408;Unigene0001424;Unigene0004000;Unigene0011792;Unigene0015481;Unigene0021263;Unigene0026310;Unigene0029821;Unigene0035773;Unigene0046585;Unigene0046672	K11430+K11430+K22748+K11423+K18826+K19199+K00128+K00128+K19199+K11420+K11423+K14157+K00658
Ascorbate and aldarate metabolism	11	72	0.947257	1	ko00053	Unigene0000804;Unigene0003944;Unigene0008234;Unigene0015481;Unigene0021263;Unigene0030527;Unigene0031086;Unigene0034697;Unigene0040450;Unigene0046655;Unigene0047368	K00225+K14190+K00012+K00128+K00128+K00434+K16190+K08232+K12447+K18649+K08232
Biosynthesis of unsaturated fatty acids	6	44	0.947729	1	ko01040	Unigene0012022;Unigene0027491;Unigene0040638;Unigene0041624;Unigene0042725;Unigene0046786	K03921+K00232+K10251+K00232+K00232+K00232
Taurine and hypotaurine metabolism	1	13	0.96214	1	ko00430	Unigene0038494	K01580
Pentose and glucuronate interconversions	15	99	0.970926	1	ko00040	Unigene0003796;Unigene0004970;Unigene0006999;Unigene0008234;Unigene0010033;Unigene0019474;Unigene0022700;Unigene0031086;Unigene0040450;Unigene0041295;Unigene0041401;Unigene0041501;Unigene0042449;Unigene0045547;Unigene0046789	K01213+K01728+K01783+K00012+K00963+K01051+K01051+K16190+K12447+K01805+K00963+K00002+K01051+K01051+K00008
Phagosome	20	129	0.978886	1	ko04145	Unigene0001512;Unigene0001668;Unigene0002275;Unigene0004319;Unigene0007516;Unigene0014964;Unigene0016141;Unigene0017611;Unigene0022160;Unigene0026967;Unigene0030992;Unigene0038964;Unigene0040372;Unigene0042248;Unigene0044368;Unigene0044847;Unigene0045161;Unigene0046450;Unigene0046472;Unigene0046473	K07374+K00921+K02144+K08517+K02152+K08054+K07375+K08057+K02147+K09481+K02146+K10956+K08057+K00914+K02149+K02145+K02148+K02151+K08488+K08488
Diterpenoid biosynthesis	3	31	0.980546	1	ko00904	Unigene0001380;Unigene0008741;Unigene0013237	K17961+K04122+K04123
Cyanoamino acid metabolism	9	69	0.981985	1	ko00460	Unigene0003038;Unigene0006407;Unigene0008552;Unigene0009018;Unigene0009846;Unigene0014273;Unigene0018865;Unigene0035561;Unigene0045032	K00600+K05349+K01188+K01188+K05349+K13034+K01188+K05350+K05349
alpha-Linolenic acid metabolism	10	77	0.986617	1	ko00592	Unigene0001460;Unigene0004818;Unigene0017856;Unigene0020849;Unigene0027419;Unigene0027491;Unigene0035464;Unigene0041624;Unigene0042725;Unigene0046786	K22389+K10528+K00454+K14674+K10526+K00232+K10527+K00232+K00232+K00232
MAPK signaling pathway - plant	31	193	0.9878	1	ko04016	Unigene0000765;Unigene0000786;Unigene0000911;Unigene0002158;Unigene0002902;Unigene0003544;Unigene0004715;Unigene0006655;Unigene0007457;Unigene0008692;Unigene0010793;Unigene0011827;Unigene0015813;Unigene0018705;Unigene0020058;Unigene0022068;Unigene0022442;Unigene0025107;Unigene0027515;Unigene0028072;Unigene0028358;Unigene0031133;Unigene0031298;Unigene0033752;Unigene0038619;Unigene0040388;Unigene00…	K14497+K20538+K13420+K14514+K20725+K14516+K20726+K20718+K13449+K13414+K14509+K20725+K20536+K14514+K13424+K14496+K13422+K14498+K20538+K13414+K02183+K20606+K20726+K14510+K17686+K02183+K20553+K20717+K20717+K17686+K20714
Fatty acid elongation	5	47	0.987939	1	ko00062	Unigene0024807;Unigene0026236;Unigene0027225;Unigene0040638;Unigene0041603	K01076+K15397+K07512+K10251+K15397
Cutin, suberine and wax biosynthesis	1	24	0.997641	1	ko00073	Unigene0027501	K17991
ABC transporters	6	68	0.999047	1	ko02010	Unigene0000870;Unigene0006531;Unigene0007858;Unigene0031981;Unigene0040446;Unigene0045933	K05658+K05643+K05655+K05656+K05663+K05674
Plant hormone signal transduction	45	298	0.999377	1	ko04075	Unigene0000326;Unigene0000355;Unigene0000514;Unigene0000530;Unigene0000756;Unigene0000765;Unigene0000903;Unigene0001636;Unigene0001905;Unigene0002158;Unigene0002964;Unigene0003544;Unigene0006406;Unigene0007457;Unigene0010793;Unigene0011037;Unigene0015166;Unigene0016828;Unigene0018705;Unigene0018964;Unigene0020924;Unigene0020999;Unigene0022068;Unigene0022442;Unigene0022962;Unigene0023920;Unigene00…	K14491+K13946+K13415+K14486+K14503+K14497+K14431+K14508+K13464+K14514+K13464+K14516+K14488+K13449+K14509+K14487+K14484+K14431+K14514+K14484+K14484+K13464+K14496+K13422+K14488+K14432+K14498+K14432+K14488+K14485+K14432+K14494+K14510+K14491+K14488+K14489+K14488+K14506+K13464+K14486+K14486+K14488+K14488+K14491+K14493
Phenylpropanoid biosynthesis	21	165	0.99943	1	ko00940	Unigene0000618;Unigene0004726;Unigene0006407;Unigene0008453;Unigene0008552;Unigene0009018;Unigene0009846;Unigene0011622;Unigene0012689;Unigene0018865;Unigene0021277;Unigene0028376;Unigene0029750;Unigene0030192;Unigene0035561;Unigene0036962;Unigene0037979;Unigene0038104;Unigene0041300;Unigene0043270;Unigene0045032	K00487+K22395+K05349+K13065+K01188+K01188+K05349+K01904+K00430+K01188+K01904+K01904+K00588+K13065+K05350+K00430+K18368+K00083+K00430+K12356+K05349
Linoleic acid metabolism	2	43	0.999742	1	ko00591	Unigene0017856;Unigene0020849	K00454+K14674
Plant-pathogen interaction	68	449	0.999961	1	ko04626	Unigene0000260;Unigene0000911;Unigene0001792;Unigene0001799;Unigene0001803;Unigene0002268;Unigene0002958;Unigene0003122;Unigene0003123;Unigene0003145;Unigene0004237;Unigene0004586;Unigene0005132;Unigene0005375;Unigene0006016;Unigene0007457;Unigene0007742;Unigene0008692;Unigene0011911;Unigene0011997;Unigene0012514;Unigene0014053;Unigene0014481;Unigene0015813;Unigene0016278;Unigene0016987;Unigene00…	K02358+K13420+K13448+K02358+K09422+K12795+K09422+K13434+K13434+K09422+K13412+K09422+K13427+K13412+K09487+K13449+K05391+K13414+K09422+K13412+K09487+K09422+K13459+K20536+K05391+K09422+K09422+K09422+K05391+K13424+K13448+K09422+K09422+K13459+K15397+K13412+K13448+K13414+K02183+K13448+K13448+K05391+K09422+K13448+K13436+K09422+K02358+K13448+K09422+K13457+K13448+K02183+K00864+K09422+K13412+K13412+K15397+…
Tryptophan metabolism	6	88	0.999979	1	ko00380	Unigene0014975;Unigene0015481;Unigene0021263;Unigene0026963;Unigene0028643;Unigene0030847	K11820+K00128+K00128+K22450+K11820+K22450
Ribosome	58	595	1	1	ko03010	Unigene0002778;Unigene0002930;Unigene0004329;Unigene0005922;Unigene0006370;Unigene0006388;Unigene0006471;Unigene0007118;Unigene0007142;Unigene0007340;Unigene0008447;Unigene0009381;Unigene0011449;Unigene0012088;Unigene0014170;Unigene0016777;Unigene0017431;Unigene0018393;Unigene0019963;Unigene0020814;Unigene0021340;Unigene0022875;Unigene0023435;Unigene0025801;Unigene0026335;Unigene0026850;Unigene00…	K02946+K02896+K02896+K02881+K02995+K02906+K02950+K02872+K02904+K02981+K02868+K02976+K02935+K02975+K02948+K02939+K02935+K02899+K02940+K02881+K02985+K02903+K02864+K02921+K02974+K02941+K02984+K02892+K02952+K02930+K02934+K02935+K02883+K02906+K02937+K02897+K02990+K02923+K02989+K02881+K02911+K02942+K02930+K02867+K02902+K02925+K02949+K02871+K02887+K02922+K02882+K02987+K02988+K02936+K02910+K02908+K02863+…

## Sheet: XZ
KEGG analysis result for single-copy genes in Chaenomeles thibetica(XZ)
Pathway	out (1525)	All (6300)	Pvalue	Qvalue	Pathway ID	Genes	K_IDs
Non-homologous end-joining	8	8	1.16246e-05	0.00149957	ko03450	Unigene0003351;Unigene0003495;Unigene0013172;Unigene0027564;Unigene0039720;Unigene0039891;Unigene0040935;Unigene0042380	K03512+K10777+K10884+K10886+K10866+K04799+K10865+K10885
Biosynthesis of amino acids	97	290	0.000173999	0.00965499	ko01230	Unigene0000023;Unigene0000063;Unigene0000205;Unigene0000583;Unigene0000988;Unigene0001340;Unigene0001393;Unigene0001756;Unigene0002223;Unigene0002574;Unigene0002707;Unigene0002736;Unigene0004900;Unigene0006044;Unigene0008033;Unigene0009339;Unigene0009795;Unigene0010095;Unigene0011359;Unigene0011482;Unigene0012166;Unigene0015035;Unigene0015371;Unigene0015645;Unigene0016767;Unigene0018769;Unigene00…	K00640+K12524+K00814+K00264+K01703+K01687+K00928+K00873+K01649+K01647+K01695+K00286+K15227+K01653+K00826+K00850+K00873+K00826+K00615+K01696+K00600+K01760+K00640+K14272+K01803+K00817+K00611+K00811+K00030+K14454+K01586+K00850+K00031+K00215+K01754+K01940+K00031+K00134+K00873+K00873+K00927+K00831+K05359+K00616+K00891+K14455+K01739+K00052+K00930+K01735+K01689+K00800+K01733+K01714+K00145+K01817+K01834+…
Nucleotide excision repair	36	87	0.000278289	0.00965499	ko03420	Unigene0001097;Unigene0002119;Unigene0005140;Unigene0005852;Unigene0006488;Unigene0008156;Unigene0008261;Unigene0008450;Unigene0008848;Unigene0009692;Unigene0011667;Unigene0014857;Unigene0016973;Unigene0021893;Unigene0022895;Unigene0023226;Unigene0024542;Unigene0025311;Unigene0026866;Unigene0028763;Unigene0029140;Unigene0029451;Unigene0029976;Unigene0032304;Unigene0032723;Unigene0034599;Unigene00…	K02326+K10755+K07466+K03141+K10755+K10846+K02335+K10609+K10844+K10755+K10848+K10739+K10747+K07466+K10841+K10838+K10840+K10754+K03505+K03506+K07466+K10740+K03504+K02327+K10747+K02328+K10610+K10839+K03143+K03505+K10839+K06634+K02202+K04802+K10756+K10843
Base excision repair	24	51	0.00029938	0.00965499	ko03410	Unigene0001097;Unigene0001555;Unigene0003351;Unigene0006286;Unigene0008261;Unigene0009061;Unigene0014030;Unigene0016488;Unigene0016973;Unigene0024843;Unigene0026866;Unigene0027691;Unigene0028763;Unigene0029174;Unigene0029976;Unigene0032304;Unigene0032723;Unigene0034599;Unigene0037064;Unigene0039891;Unigene0040165;Unigene0040251;Unigene0040539;Unigene0040556	K02326+K01247+K03512+K10801+K02335+K01246+K10803+K03575+K10747+K03648+K03505+K01246+K03506+K03660+K03504+K02327+K10747+K02328+K03505+K04799+K10773+K01142+K01247+K04802
Ribosome biogenesis in eukaryotes	39	100	0.00066128	0.017061	ko03008	Unigene0000546;Unigene0000776;Unigene0002117;Unigene0002576;Unigene0004057;Unigene0005890;Unigene0006681;Unigene0008483;Unigene0011069;Unigene0011129;Unigene0011978;Unigene0011995;Unigene0016939;Unigene0019182;Unigene0019363;Unigene0019978;Unigene0020266;Unigene0020882;Unigene0021443;Unigene0031082;Unigene0033414;Unigene0034299;Unigene0034891;Unigene0035299;Unigene0035419;Unigene0035490;Unigene00…	K14571+K14554+K01164+K03539+K14572+K14563+K14568+K03538+K14546+K14565+K11131+K14559+K14556+K07936+K14558+K14536+K06943+K11130+K14560+K14550+K14290+K14561+K12619+K14538+K14552+K14537+K07562+K14573+K14567+K14566+K06943+K03097+K14521+K11108+K03537+K14569+K14574+K14549+K14548
N-Glycan biosynthesis	24	54	0.000847074	0.0178258	ko00510	Unigene0003050;Unigene0003321;Unigene0004728;Unigene0012158;Unigene0015769;Unigene0016874;Unigene0017072;Unigene0017303;Unigene0020212;Unigene0020659;Unigene0020660;Unigene0021524;Unigene0030807;Unigene0031473;Unigene0032773;Unigene0034506;Unigene0037061;Unigene0038807;Unigene0040592;Unigene0040614;Unigene0040643;Unigene0042125;Unigene0043118;Unigene0043382	K12666+K09658+K00737+K01228+K00902+K07151+K00726+K12670+K00737+K03849+K03849+K12667+K00729+K05546+K00721+K03850+K01230+K03846+K03842+K00737+K01231+K03843+K03847+K07432
Purine metabolism	74	221	0.000967294	0.0178258	ko00230	Unigene0000544;Unigene0001097;Unigene0001756;Unigene0001794;Unigene0002093;Unigene0002712;Unigene0003018;Unigene0003417;Unigene0003957;Unigene0006888;Unigene0006900;Unigene0007627;Unigene0008261;Unigene0009103;Unigene0009795;Unigene0011882;Unigene0013262;Unigene0013521;Unigene0013813;Unigene0014753;Unigene0014776;Unigene0015125;Unigene0015545;Unigene0021085;Unigene0022321;Unigene0022592;Unigene00…	K03006+K02326+K00873+K01490+K01951+K03005+K00939+K01835+K01081+K01517+K10807+K02999+K02335+K01519+K00873+K03019+K03002+K14641+K03013+K01835+K01939+K03015+K01510+K01756+K01510+K00873+K00873+K03021+K18447+K02083+K00764+K13811+K00365+K03505+K03025+K03506+K14977+K03504+K00939+K02327+K03017+K03010+K03787+K03016+K02328+K01952+K01513+K00951+K00602+K00962+K00939+K10808+K03020+K11808+K01427+K03505+K03012+…
Mismatch repair	25	58	0.00114829	0.0185162	ko03430	Unigene0002119;Unigene0003668;Unigene0005140;Unigene0005260;Unigene0006488;Unigene0009692;Unigene0013076;Unigene0014857;Unigene0016354;Unigene0016973;Unigene0021893;Unigene0023103;Unigene0025311;Unigene0026866;Unigene0029140;Unigene0029451;Unigene0029976;Unigene0032304;Unigene0032335;Unigene0032723;Unigene0034599;Unigene0036401;Unigene0037064;Unigene0040556;Unigene0041370	K10755+K08734+K07466+K08737+K10755+K10755+K03111+K10739+K08739+K10747+K07466+K08735+K10754+K03505+K07466+K10740+K03504+K02327+K10858+K10747+K02328+K07456+K03505+K04802+K10756
Aminoacyl-tRNA biosynthesis	31	80	0.0025643	0.0334086	ko00970	Unigene0000373;Unigene0000589;Unigene0001085;Unigene0001540;Unigene0003200;Unigene0003850;Unigene0005050;Unigene0005510;Unigene0011605;Unigene0012334;Unigene0012947;Unigene0013543;Unigene0017327;Unigene0019087;Unigene0020483;Unigene0026343;Unigene0029916;Unigene0031084;Unigene0031090;Unigene0034475;Unigene0034965;Unigene0035093;Unigene0035844;Unigene0036253;Unigene0036890;Unigene0038336;Unigene00…	K01870+K01873+K01869+K01881+K01872+K01867+K01890+K04567+K01889+K01880+K01866+K01874+K14164+K01893+K01872+K01868+K01889+K01875+K00604+K01886+K01873+K01869+K01875+K01887+K01868+K01883+K01874+K01883+K01876+K01893+K02434
RNA transport	77	239	0.00258982	0.0334086	ko03013	Unigene0000328;Unigene0000362;Unigene0000437;Unigene0000449;Unigene0000606;Unigene0000620;Unigene0000941;Unigene0001745;Unigene0001802;Unigene0002052;Unigene0002117;Unigene0002551;Unigene0002576;Unigene0002925;Unigene0003294;Unigene0003681;Unigene0004026;Unigene0004065;Unigene0005659;Unigene0006414;Unigene0006718;Unigene0007019;Unigene0007089;Unigene0007099;Unigene0007524;Unigene0008483;Unigene00…	K14288+K09291+K12812+K14327+K14289+K03254+K03260+K03236+K14303+K14317+K01164+K03243+K03539+K14312+K14318+K03247+K14004+K13130+K14314+K13114+K12882+K03262+K14300+K14305+K12876+K03538+K13126+K03257+K03251+K12879+K12880+K13126+K14304+K03260+K03239+K03242+K13126+K07936+K12812+K00784+K14310+K03680+K14321+K12877+K18213+K05749+K03260+K13025+K03240+K14291+K13151+K14326+K14290+K03248+K03113+K12878+K03680+…
Vitamin B6 metabolism	9	15	0.0032735	0.0383892	ko00750	Unigene0002385;Unigene0015577;Unigene0022694;Unigene0024335;Unigene0028462;Unigene0036829;Unigene0039346;Unigene0040003;Unigene0041261	K00275+K08681+K00831+K06215+K01733+K05275+K00868+K00275+K01733
Terpenoid backbone biosynthesis	22	54	0.00514537	0.0553127	ko00900	Unigene0000574;Unigene0004791;Unigene0005768;Unigene0006990;Unigene0006998;Unigene0008060;Unigene0009131;Unigene0010706;Unigene0011002;Unigene0012908;Unigene0014730;Unigene0018532;Unigene0020536;Unigene0029969;Unigene0032612;Unigene0034672;Unigene0035960;Unigene0037859;Unigene0038387;Unigene0038706;Unigene0041178;Unigene0042096	K01641+K10960+K05955+K00919+K01823+K01597+K11778+K03526+K00099+K06013+K15891+K11778+K00991+K13789+K05906+K13789+K01662+K11778+K01662+K00021+K00021+K05356
2-Oxocarboxylic acid metabolism	27	71	0.00634919	0.0630035	ko01210	Unigene0000205;Unigene0000988;Unigene0001340;Unigene0001393;Unigene0002223;Unigene0002574;Unigene0004204;Unigene0006044;Unigene0008033;Unigene0010095;Unigene0015645;Unigene0016992;Unigene0019303;Unigene0019624;Unigene0020423;Unigene0021256;Unigene0022475;Unigene0026156;Unigene0026629;Unigene0027626;Unigene0029482;Unigene0035524;Unigene0035667;Unigene0037693;Unigene0039639;Unigene0041189;Unigene00…	K00814+K01703+K01687+K00928+K01649+K01647+K11820+K01653+K00826+K00826+K14272+K11820+K00811+K00030+K14454+K00031+K00031+K14455+K00052+K00930+K00145+K01647+K00818+K14682+K00053+K01704+K14677
Valine, leucine and isoleucine biosynthesis	10	19	0.0069143	0.0637104	ko00290	Unigene0000988;Unigene0001340;Unigene0002223;Unigene0006044;Unigene0008033;Unigene0010095;Unigene0021976;Unigene0026629;Unigene0039639;Unigene0041189	K01703+K01687+K01649+K01653+K00826+K00826+K01754+K00052+K00053+K01704
Glycolysis / Gluconeogenesis	49	150	0.0109604	0.0892467	ko00010	Unigene0001400;Unigene0001756;Unigene0002400;Unigene0003417;Unigene0004550;Unigene0005177;Unigene0006914;Unigene0008566;Unigene0009339;Unigene0009420;Unigene0009795;Unigene0010096;Unigene0010277;Unigene0010594;Unigene0014753;Unigene0016767;Unigene0017239;Unigene0020404;Unigene0021009;Unigene0021166;Unigene0022202;Unigene0022493;Unigene0022592;Unigene0022593;Unigene0022638;Unigene0022750;Unigene00…	K00016+K00873+K00382+K01835+K03841+K00627+K01792+K00162+K00850+K01785+K00873+K01895+K00001+K00002+K01835+K01803+K00161+K00162+K00131+K00850+K00895+K00134+K00873+K00873+K00927+K00121+K01568+K00844+K01810+K01689+K01834+K03841+K03103+K00121+K01623+K00627+K01792+K01913+K01689+K01568+K01834+K01689+K03841+K00873+K00873+K00128+K01792+K00850+K00128
Pentose phosphate pathway	25	67	0.0110694	0.0892467	ko00030	Unigene0003417;Unigene0004550;Unigene0005791;Unigene0006258;Unigene0009339;Unigene0010261;Unigene0011359;Unigene0014753;Unigene0014945;Unigene0016912;Unigene0021009;Unigene0021166;Unigene0022202;Unigene0023484;Unigene0023624;Unigene0025106;Unigene0028333;Unigene0031100;Unigene0032704;Unigene0034181;Unigene0038575;Unigene0040301;Unigene0041077;Unigene0041221;Unigene0042065	K01835+K03841+K00036+K00033+K00850+K00036+K00615+K01835+K01057+K00033+K00131+K00850+K00895+K01057+K00616+K01810+K00852+K03841+K00616+K01623+K01783+K03841+K00948+K01807+K00850
Proteasome	25	68	0.0135805	0.0974861	ko03050	Unigene0000992;Unigene0003046;Unigene0005631;Unigene0007688;Unigene0011389;Unigene0012888;Unigene0013341;Unigene0018167;Unigene0021643;Unigene0021875;Unigene0021912;Unigene0024549;Unigene0025406;Unigene0026344;Unigene0029074;Unigene0032919;Unigene0034849;Unigene0035862;Unigene0036729;Unigene0037850;Unigene0040019;Unigene0041576;Unigene0041917;Unigene0042119;Unigene0042762	K06700+K10881+K03036+K02735+K02727+K03037+K03039+K03031+K03065+K06699+K02730+K02726+K03064+K03066+K03028+K03033+K02729+K03063+K02739+K03062+K03029+K06691+K03033+K02731+K03030
Phenylalanine, tyrosine and tryptophan biosynthesis	20	52	0.0152821	0.0974861	ko00400	Unigene0002707;Unigene0004900;Unigene0011482;Unigene0018769;Unigene0019303;Unigene0020423;Unigene0023046;Unigene0024885;Unigene0026156;Unigene0028066;Unigene0028377;Unigene0029912;Unigene0035717;Unigene0036124;Unigene0036537;Unigene0036538;Unigene0037224;Unigene0037491;Unigene0040560;Unigene0041655	K01695+K15227+K01696+K00817+K00811+K14454+K05359+K00891+K14455+K01735+K00800+K01817+K15227+K01626+K01626+K01626+K01626+K00815+K01657+K01658
mRNA surveillance pathway	48	149	0.0153636	0.0974861	ko03015	Unigene0000437;Unigene0000449;Unigene0001396;Unigene0001890;Unigene0002884;Unigene0003810;Unigene0003941;Unigene0005372;Unigene0005844;Unigene0006414;Unigene0006718;Unigene0007524;Unigene0008677;Unigene0009728;Unigene0012220;Unigene0014760;Unigene0014846;Unigene0015389;Unigene0015936;Unigene0017277;Unigene0018364;Unigene0019751;Unigene0020490;Unigene0020868;Unigene0021075;Unigene0022558;Unigene00…	K12812+K14327+K14411+K11583+K14962+K00565+K14402+K14399+K14404+K13114+K12882+K12876+K13126+K14411+K13126+K06965+K00565+K14411+K14400+K13126+K14397+K12812+K14407+K04382+K14409+K14406+K12877+K03456+K13917+K14962+K13025+K14326+K14376+K06100+K06100+K11584+K03456+K14403+K14416+K13917+K11584+K14401+K14404+K12875+K14396+K14396+K03267+K14324
Histidine metabolism	10	21	0.0163302	0.0974861	ko00340	Unigene0011869;Unigene0018769;Unigene0034332;Unigene0035053;Unigene0035765;Unigene0038912;Unigene0039642;Unigene0041528;Unigene0041582;Unigene0043456	K01590+K00817+K00765+K01814+K01693+K11755+K01663+K00128+K18649+K00128
Metabolic pathways	626	2438	0.0165503	0.0974861	ko01100	Unigene0000017;Unigene0000023;Unigene0000049;Unigene0000063;Unigene0000086;Unigene0000205;Unigene0000222;Unigene0000503;Unigene0000544;Unigene0000574;Unigene0000583;Unigene0000595;Unigene0000628;Unigene0000962;Unigene0000988;Unigene0001035;Unigene0001045;Unigene0001097;Unigene0001183;Unigene0001192;Unigene0001198;Unigene0001248;Unigene0001259;Unigene0001340;Unigene0001373;Unigene0001393;Unigene00…	K03934+K00640+K22389+K12524+K02152+K00814+K00888+K13941+K03006+K01641+K00264+K00281+K11262+K16190+K01703+K12446+K00654+K02326+K00297+K00026+K01190+K01051+K01054+K01687+K00232+K00928+K00016+K00079+K00679+K00873+K01490+K00913+K00963+K01951+K10251+K07541+K04122+K01649+K00275+K00382+K00167+K00208+K01647+K01188+K02492+K01194+K18368+K01695+K03005+K00286+K00972+K00975+K00939+K04712+K12666+K13082+K01465+…
Folate biosynthesis	12	27	0.0166255	0.0974861	ko00790	Unigene0000503;Unigene0001410;Unigene0005530;Unigene0006335;Unigene0008092;Unigene0008456;Unigene0010717;Unigene0013005;Unigene0021573;Unigene0034043;Unigene0039617;Unigene0043535	K13941+K00079+K01930+K18482+K15631+K15376+K13998+K01724+K03637+K01930+K18482+K20457
Basal transcription factors	20	53	0.0191027	0.107141	ko03022	Unigene0002954;Unigene0005852;Unigene0006820;Unigene0006946;Unigene0007485;Unigene0008848;Unigene0009739;Unigene0013939;Unigene0018882;Unigene0024857;Unigene0032838;Unigene0033698;Unigene0035743;Unigene0035883;Unigene0036358;Unigene0037883;Unigene0038243;Unigene0038971;Unigene0039291;Unigene0042262	K14649+K03141+K03129+K03132+K03136+K10844+K03138+K03123+K03135+K03125+K03124+K03133+K03143+K03130+K03128+K03137+K06634+K03124+K02202+K10843
Alanine, aspartate and glutamate metabolism	21	57	0.0220104	0.114191	ko00250	Unigene0000205;Unigene0000583;Unigene0005638;Unigene0005840;Unigene0006951;Unigene0010076;Unigene0014505;Unigene0014776;Unigene0015645;Unigene0019303;Unigene0020423;Unigene0021085;Unigene0022250;Unigene0025434;Unigene0026156;Unigene0026190;Unigene0031534;Unigene0035277;Unigene0036343;Unigene0036871;Unigene0041407	K00814+K00264+K13566+K01580+K00294+K00830+K01956+K01939+K14272+K00811+K14454+K01756+K01940+K00764+K14455+K00262+K00820+K01955+K00827+K01915+K00609
Carbon metabolism	99	342	0.0221301	0.114191	ko01200	Unigene0000023;Unigene0000205;Unigene0000595;Unigene0001183;Unigene0001192;Unigene0001756;Unigene0002400;Unigene0002574;Unigene0003287;Unigene0004012;Unigene0004550;Unigene0005177;Unigene0005791;Unigene0006258;Unigene0006436;Unigene0008566;Unigene0009289;Unigene0009339;Unigene0009795;Unigene0010076;Unigene0010096;Unigene0010261;Unigene0010815;Unigene0011359;Unigene0012166;Unigene0012780;Unigene00…	K00640+K00814+K00281+K00297+K00026+K00873+K00382+K01647+K18121+K00051+K03841+K00627+K00036+K00033+K00605+K00162+K00026+K00850+K00873+K00830+K01895+K00036+K05605+K00615+K00600+K00026+K00234+K01899+K01057+K00640+K14272+K01006+K02437+K01803+K00033+K00161+K19269+K00863+K01961+K01601+K00030+K00162+K14454+K00029+K00131+K01962+K00850+K00031+K01962+K00658+K01754+K00140+K00031+K00134+K00873+K00873+K00927+…
Thiamine metabolism	11	25	0.023366	0.115829	ko00730	Unigene0003018;Unigene0015530;Unigene0027976;Unigene0031495;Unigene0035960;Unigene0036198;Unigene0037014;Unigene0038163;Unigene0038387;Unigene0042580;Unigene0042883	K00939+K14153+K00878+K00939+K01662+K00939+K06949+K06928+K01662+K00949+K00939
Pyruvate metabolism	35	106	0.0242433	0.115829	ko00620	Unigene0000628;Unigene0001192;Unigene0001400;Unigene0001756;Unigene0002223;Unigene0002400;Unigene0004012;Unigene0005177;Unigene0008566;Unigene0009289;Unigene0009650;Unigene0009795;Unigene0010096;Unigene0012780;Unigene0016006;Unigene0017239;Unigene0018566;Unigene0020404;Unigene0020707;Unigene0021127;Unigene0021620;Unigene0022592;Unigene0022593;Unigene0034613;Unigene0034904;Unigene0035799;Unigene00…	K11262+K00026+K00016+K00873+K01649+K00382+K00051+K00627+K00162+K00026+K01512+K00873+K01895+K00026+K01006+K00161+K01961+K00162+K00029+K01962+K01962+K00873+K00873+K00627+K00102+K00028+K01913+K00873+K01679+K01595+K00873+K00128+K18881+K00028+K00128
RNA degradation	45	145	0.035093	0.160379	ko03018	Unigene0000047;Unigene0000244;Unigene0000276;Unigene0000985;Unigene0001270;Unigene0002063;Unigene0003246;Unigene0003676;Unigene0004826;Unigene0005910;Unigene0007444;Unigene0008677;Unigene0009339;Unigene0011976;Unigene0012220;Unigene0017277;Unigene0017924;Unigene0018970;Unigene0019758;Unigene0020248;Unigene0020921;Unigene0021166;Unigene0024602;Unigene0025261;Unigene0025361;Unigene0025467;Unigene00…	K12580+K12598+K12604+K10643+K12603+K12603+K12605+K12616+K03681+K11600+K12608+K13126+K00850+K12608+K13126+K13126+K12627+K04077+K04077+K10643+K12614+K00850+K01148+K12607+K12591+K12600+K01689+K12585+K04077+K12617+K12619+K12599+K12593+K00962+K12581+K12623+K12587+K03678+K01689+K12581+K01689+K12603+K00962+K12598+K00850
Propanoate metabolism	17	46	0.0360542	0.160379	ko00640	Unigene0000628;Unigene0001400;Unigene0002400;Unigene0002413;Unigene0010096;Unigene0010815;Unigene0013089;Unigene0018566;Unigene0021127;Unigene0021620;Unigene0022324;Unigene0023849;Unigene0024864;Unigene0035117;Unigene0036493;Unigene0041097;Unigene0041660	K11262+K00016+K00382+K00167+K01895+K05605+K01899+K01961+K01962+K01962+K00140+K00249+K05605+K01900+K01578+K09699+K00140
Amino sugar and nucleotide sugar metabolism	42	135	0.0391976	0.16855	ko00520	Unigene0000021;Unigene0000962;Unigene0001035;Unigene0002053;Unigene0002148;Unigene0002857;Unigene0002970;Unigene0003417;Unigene0004504;Unigene0006207;Unigene0008785;Unigene0013218;Unigene0014753;Unigene0015211;Unigene0015342;Unigene0018390;Unigene0018575;Unigene0023581;Unigene0024136;Unigene0024879;Unigene0025106;Unigene0026748;Unigene0027284;Unigene0029961;Unigene0030063;Unigene0031534;Unigene00…	K01209+K16190+K12446+K00963+K13648+K00972+K00975+K01835+K00012+K00966+K00963+K00847+K01835+K01711+K00965+K01784+K13648+K00847+K00844+K12373+K01810+K06118+K00326+K08679+K01183+K00820+K00326+K13648+K15920+K13648+K08678+K08679+K13648+K05305+K00975+K12448+K01183+K01836+K13648+K12447+K01183+K18677
Arginine biosynthesis	16	44	0.0476823	0.19842	ko00220	Unigene0000205;Unigene0015645;Unigene0018227;Unigene0019026;Unigene0019303;Unigene0020423;Unigene0022250;Unigene0026156;Unigene0026190;Unigene0027626;Unigene0029482;Unigene0035667;Unigene0036862;Unigene0036871;Unigene0037693;Unigene0041231	K00814+K14272+K13427+K00611+K00811+K14454+K01940+K14455+K00262+K00930+K00145+K00818+K01427+K01915+K14682+K14677
Galactose metabolism	23	69	0.0541676	0.218363	ko00052	Unigene0000277;Unigene0001198;Unigene0002053;Unigene0003417;Unigene0003824;Unigene0005120;Unigene0005611;Unigene0008785;Unigene0009339;Unigene0009420;Unigene0011656;Unigene0014083;Unigene0014753;Unigene0015342;Unigene0018390;Unigene0021166;Unigene0024136;Unigene0024967;Unigene0028833;Unigene0032531;Unigene0040769;Unigene0041460;Unigene0042065	K06617+K01190+K00963+K01835+K01187+K06617+K01193+K00963+K00850+K01785+K18819+K18819+K01835+K00965+K01784+K00850+K00844+K07407+K06617+K06617+K12309+K12447+K00850
Tyrosine metabolism	17	49	0.0640655	0.250132	ko00350	Unigene0005089;Unigene0005090;Unigene0007683;Unigene0010277;Unigene0012460;Unigene0018769;Unigene0019303;Unigene0020423;Unigene0022288;Unigene0022750;Unigene0026156;Unigene0028033;Unigene0028766;Unigene0033808;Unigene0034207;Unigene0037491;Unigene0038288	K00422+K00422+K00451+K00001+K00422+K00817+K00811+K14454+K00276+K00121+K14455+K00422+K00422+K00121+K07253+K00815+K01555
Glucosinolate biosynthesis	5	10	0.0690425	0.250132	ko00966	Unigene0000988;Unigene0004204;Unigene0008033;Unigene0010095;Unigene0016992	K01703+K11820+K00826+K00826+K11820
Protein export	20	60	0.0693392	0.250132	ko03060	Unigene0002648;Unigene0002719;Unigene0003458;Unigene0003628;Unigene0006308;Unigene0006567;Unigene0009297;Unigene0010772;Unigene0014635;Unigene0017105;Unigene0018185;Unigene0021464;Unigene0022769;Unigene0023760;Unigene0028525;Unigene0034853;Unigene0036635;Unigene0036886;Unigene0040508;Unigene0043196	K03106+K09540+K03217+K09647+K03217+K03070+K12272+K10956+K12275+K09647+K03217+K13431+K09481+K09648+K03107+K03106+K03070+K03105+K03070+K03110
Lysine biosynthesis	6	13	0.0698043	0.250132	ko00300	Unigene0000063;Unigene0001393;Unigene0020975;Unigene0021891;Unigene0028925;Unigene0035967	K12524+K00928+K01586+K00215+K01714+K10206
Spliceosome	88	317	0.0751915	0.255441	ko03040	Unigene0000067;Unigene0000176;Unigene0000437;Unigene0001382;Unigene0001620;Unigene0001907;Unigene0001968;Unigene0002779;Unigene0004188;Unigene0004865;Unigene0006651;Unigene0006718;Unigene0007475;Unigene0007510;Unigene0007524;Unigene0007733;Unigene0008846;Unigene0008944;Unigene0009214;Unigene0009874;Unigene0010293;Unigene0010794;Unigene0011601;Unigene0011984;Unigene0012019;Unigene0012348;Unigene00…	K12842+K03283+K12812+K12836+K12823+K12818+K12741+K12837+K12662+K12819+K12890+K12882+K12861+K12837+K12876+K12829+K12856+K12741+K12833+K12825+K12830+K12879+K12865+K12880+K12821+K12850+K12896+K12741+K12893+K12823+K12860+K12826+K12897+K12900+K12890+K12828+K12839+K12818+K12823+K12627+K12741+K12812+K12867+K12852+K12741+K11099+K12893+K12836+K12820+K12843+K12877+K12868+K03283+K12869+K11984+K11097+K13025+…
Isoquinoline alkaloid biosynthesis	10	26	0.0752463	0.255441	ko00950	Unigene0005089;Unigene0005090;Unigene0012460;Unigene0019303;Unigene0020423;Unigene0022288;Unigene0026156;Unigene0028033;Unigene0028766;Unigene0037491	K00422+K00422+K00422+K00811+K14454+K00276+K14455+K00422+K00422+K00815
One carbon pool by folate	11	30	0.0871027	0.288109	ko00670	Unigene0001183;Unigene0006436;Unigene0008256;Unigene0010717;Unigene0012166;Unigene0024728;Unigene0031090;Unigene0036078;Unigene0036236;Unigene0038398;Unigene0043367	K00297+K00605+K00288+K13998+K00600+K01938+K00604+K00602+K01934+K01934+K01433
Glycosylphosphatidylinositol(GPI)-anchor biosynthesis	13	37	0.0896948	0.289266	ko00563	Unigene0002123;Unigene0003321;Unigene0003872;Unigene0012639;Unigene0016455;Unigene0023111;Unigene0028991;Unigene0031065;Unigene0036870;Unigene0039357;Unigene0041141;Unigene0042537;Unigene0042757	K07541+K09658+K03861+K03434+K03859+K05290+K11001+K05292+K05291+K03857+K05310+K05284+K05286
C5-Branched dibasic acid metabolism	4	8	0.102985	0.324026	ko00660	Unigene0000988;Unigene0006044;Unigene0026629;Unigene0041189	K01703+K01653+K00052+K01704
Glycerolipid metabolism	29	97	0.116623	0.3582	ko00561	Unigene0001259;Unigene0001706;Unigene0004379;Unigene0006527;Unigene0010406;Unigene0010594;Unigene0013401;Unigene0014363;Unigene0018379;Unigene0018477;Unigene0021057;Unigene0024468;Unigene0024967;Unigene0026521;Unigene0026748;Unigene0032727;Unigene0033234;Unigene0034501;Unigene0034709;Unigene0034871;Unigene0035283;Unigene0036747;Unigene0037157;Unigene0038399;Unigene0039842;Unigene0041528;Unigene00…	K01054+K00679+K01054+K09480+K00864+K00002+K01054+K01054+K00863+K13519+K15728+K18693+K07407+K13508+K06118+K13513+K06119+K03715+K14674+K15918+K09480+K00901+K21362+K13523+K00630+K00128+K22848+K00655+K00128
Pyrimidine metabolism	48	170	0.125398	0.376193	ko00240	Unigene0000544;Unigene0001097;Unigene0002712;Unigene0003170;Unigene0003957;Unigene0005186;Unigene0006900;Unigene0007627;Unigene0008261;Unigene0010717;Unigene0011882;Unigene0013250;Unigene0013262;Unigene0013521;Unigene0013813;Unigene0014505;Unigene0015034;Unigene0015125;Unigene0015545;Unigene0020814;Unigene0022321;Unigene0022792;Unigene0024872;Unigene0026866;Unigene0027584;Unigene0028763;Unigene00…	K03006+K02326+K03005+K01465+K01081+K13421+K10807+K02999+K02335+K13998+K03019+K13800+K03002+K14641+K03013+K01956+K00943+K03015+K01510+K01431+K01510+K03021+K00876+K03505+K03025+K03506+K03504+K02327+K16329+K03017+K03010+K00254+K03787+K03016+K02328+K01513+K01464+K01955+K00962+K10808+K03020+K03505+K03012+K03023+K03026+K03024+K00962+K00609
Biosynthesis of secondary metabolites	336	1326	0.147403	0.427852	ko01110	Unigene0000023;Unigene0000049;Unigene0000063;Unigene0000574;Unigene0000583;Unigene0000595;Unigene0000628;Unigene0000988;Unigene0001192;Unigene0001340;Unigene0001373;Unigene0001393;Unigene0001400;Unigene0001756;Unigene0001794;Unigene0002111;Unigene0002186;Unigene0002223;Unigene0002400;Unigene0002413;Unigene0002574;Unigene0002590;Unigene0002617;Unigene0002706;Unigene0002707;Unigene0002736;Unigene00…	K00640+K22389+K12524+K01641+K00264+K00281+K11262+K01703+K00026+K01687+K00232+K00928+K00016+K00873+K01490+K10251+K04122+K01649+K00382+K00167+K01647+K01188+K02492+K18368+K01695+K00286+K00975+K00939+K13082+K01835+K01114+K01114+K14760+K01081+K11820+K00487+K03841+K06443+K00705+K10960+K15227+K10527+K00422+K00422+K00627+K00227+K00430+K00454+K11752+K00036+K01580+K09835+K01653+K00966+K00033+K00605+K00083+…
Porphyrin and chlorophyll metabolism	19	62	0.149251	0.427852	ko00860	Unigene0002617;Unigene0004791;Unigene0006908;Unigene0009734;Unigene0009735;Unigene0014345;Unigene0016178;Unigene0033408;Unigene0034439;Unigene0034578;Unigene0035305;Unigene0036904;Unigene0038087;Unigene0040201;Unigene0040430;Unigene0041622;Unigene0041673;Unigene0041703;Unigene0042204	K02492+K10960+K01772+K13545+K13071+K08101+K13606+K00231+K01772+K01749+K01599+K01599+K03404+K08099+K04035+K04040+K18010+K02259+K00231
beta-Alanine metabolism	17	55	0.156667	0.432098	ko00410	Unigene0005840;Unigene0010815;Unigene0011102;Unigene0018768;Unigene0020664;Unigene0020814;Unigene0022288;Unigene0022324;Unigene0023849;Unigene0024864;Unigene0032737;Unigene0035042;Unigene0036493;Unigene0041009;Unigene0041528;Unigene0041660;Unigene0043456	K01580+K05605+K13366+K01918+K00797+K01431+K00276+K00140+K00249+K05605+K00797+K01464+K01578+K17839+K00128+K00140+K00128
Cysteine and methionine metabolism	35	123	0.157431	0.432098	ko00270	Unigene0000023;Unigene0000063;Unigene0001192;Unigene0001393;Unigene0001400;Unigene0008033;Unigene0009289;Unigene0010095;Unigene0011834;Unigene0012780;Unigene0013688;Unigene0015035;Unigene0015371;Unigene0019303;Unigene0020423;Unigene0020664;Unigene0021261;Unigene0023414;Unigene0026156;Unigene0026364;Unigene0031173;Unigene0031310;Unigene0032737;Unigene0033627;Unigene0035728;Unigene0035971;Unigene00…	K00640+K12524+K00026+K00928+K00016+K00826+K00026+K00826+K00558+K00026+K01919+K01760+K00640+K00811+K14454+K00797+K01251+K21456+K14455+K01739+K01244+K00547+K00797+K00899+K16054+K00547+K00827+K01011+K00815+K00640+K01738+K01761+K00547+K13034+K00789
Glycosaminoglycan degradation	6	16	0.168978	0.454128	ko00531	Unigene0012679;Unigene0014186;Unigene0024879;Unigene0037443;Unigene0039852;Unigene0040769	K10532+K01205+K12373+K10532+K07964+K12309
Sulfur relay system	5	13	0.186289	0.489135	ko04122	Unigene0021573;Unigene0031289;Unigene0036689;Unigene0037264;Unigene0042846	K03637+K12161+K01011+K14168+K11996
Other glycan degradation	7	20	0.189587	0.489135	ko00511	Unigene0001198;Unigene0024879;Unigene0028678;Unigene0031064;Unigene0037521;Unigene0040769;Unigene0041293	K01190+K12373+K17108+K01206+K01444+K12309+K01227
Homologous recombination	27	96	0.214483	0.542517	ko03440	Unigene0003046;Unigene0003889;Unigene0005140;Unigene0008261;Unigene0009902;Unigene0013076;Unigene0013949;Unigene0014857;Unigene0021612;Unigene0021893;Unigene0024524;Unigene0026187;Unigene0026866;Unigene0029140;Unigene0029451;Unigene0029976;Unigene0030236;Unigene0032304;Unigene0034599;Unigene0037064;Unigene0037328;Unigene0039578;Unigene0039720;Unigene0040930;Unigene0040935;Unigene0040995;Unigene00…	K10881+K03165+K07466+K02335+K10880+K03111+K11864+K10739+K10869+K07466+K10875+K10875+K03505+K07466+K10740+K03504+K10882+K02327+K02328+K03505+K20776+K10901+K10866+K10867+K10865+K03165+K10728
Peroxisome	29	105	0.236435	0.563194	ko04146	Unigene0000139;Unigene0001373;Unigene0001773;Unigene0005012;Unigene0007916;Unigene0010076;Unigene0012144;Unigene0012250;Unigene0013139;Unigene0013748;Unigene0013946;Unigene0014674;Unigene0017502;Unigene0021256;Unigene0022475;Unigene0032601;Unigene0032632;Unigene0033427;Unigene0033665;Unigene0033990;Unigene0034132;Unigene0035957;Unigene0036493;Unigene0037393;Unigene0037968;Unigene0039850;Unigene00…	K13339+K00232+K04564+K01897+K00477+K00830+K13348+K12261+K13348+K13341+K13347+K01897+K13346+K00031+K00031+K00232+K13337+K06664+K13344+K01897+K13338+K17879+K01578+K13336+K00232+K13348+K00232+K12663+K00106
Sphingolipid metabolism	11	36	0.237732	0.563194	ko00600	Unigene0001045;Unigene0001198;Unigene0003035;Unigene0003692;Unigene0024967;Unigene0028678;Unigene0031369;Unigene0034464;Unigene0035260;Unigene0035453;Unigene0040769	K00654+K01190+K04712+K04715+K07407+K17108+K04708+K04710+K01634+K04718+K12309
Valine, leucine and isoleucine degradation	17	59	0.24475	0.563194	ko00280	Unigene0000574;Unigene0002400;Unigene0002413;Unigene0008033;Unigene0010095;Unigene0010815;Unigene0022324;Unigene0023849;Unigene0024864;Unigene0035563;Unigene0036343;Unigene0036628;Unigene0039235;Unigene0041097;Unigene0041528;Unigene0041660;Unigene0043456	K01641+K00382+K00167+K00826+K00826+K05605+K00140+K00249+K05605+K05607+K00827+K01968+K01969+K09699+K00128+K00140+K00128
Autophagy - other eukaryotes	17	59	0.24475	0.563194	ko04136	Unigene0000045;Unigene0000682;Unigene0000882;Unigene0000913;Unigene0001880;Unigene0006921;Unigene0007248;Unigene0015062;Unigene0015139;Unigene0016871;Unigene0020868;Unigene0022677;Unigene0025463;Unigene0034443;Unigene0034969;Unigene0035399;Unigene0038650	K08333+K07203+K17906+K08269+K17606+K07204+K17888+K08341+K17890+K08337+K04382+K17907+K00914+K08334+K08266+K08330+K08331
Glycosphingolipid biosynthesis - ganglio series	2	4	0.248363	0.563194	ko00604	Unigene0024879;Unigene0040769	K12373+K12309
Selenocompound metabolism	9	29	0.253219	0.563194	ko00450	Unigene0013543;Unigene0015035;Unigene0025836;Unigene0026364;Unigene0037806;Unigene0038176;Unigene0039446;Unigene0039448;Unigene0040306	K01874+K01760+K13811+K01739+K00384+K11717+K01874+K01761+K08247
Nicotinate and nicotinamide metabolism	9	29	0.253219	0.563194	ko00760	Unigene0000198;Unigene0003957;Unigene0016633;Unigene0020827;Unigene0031738;Unigene0034376;Unigene0034824;Unigene0036347;Unigene0039301	K18551+K01081+K01950+K00767+K00858+K03787+K01513+K00763+K18551
Fatty acid degradation	16	56	0.265782	0.581116	ko00071	Unigene0001373;Unigene0005012;Unigene0005032;Unigene0010277;Unigene0014674;Unigene0022750;Unigene0023849;Unigene0031341;Unigene0032601;Unigene0033808;Unigene0033990;Unigene0036953;Unigene0037968;Unigene0040627;Unigene0041528;Unigene0043456	K00232+K01897+K10527+K00001+K01897+K00121+K00249+K07517+K00232+K00121+K01897+K07517+K00232+K00232+K00128+K00128
Monobactam biosynthesis	5	15	0.287442	0.612448	ko00261	Unigene0000063;Unigene0001393;Unigene0021891;Unigene0025836;Unigene0028925	K12524+K00928+K00215+K13811+K01714
Nitrogen metabolism	9	30	0.289607	0.612448	ko00910	Unigene0000583;Unigene0001499;Unigene0008812;Unigene0010371;Unigene0026190;Unigene0027000;Unigene0035198;Unigene0036871;Unigene0041489	K00264+K02575+K00284+K00366+K00262+K01673+K01673+K01915+K01673
Fatty acid metabolism	21	77	0.30336	0.631184	ko01212	Unigene0000628;Unigene0001373;Unigene0002111;Unigene0002537;Unigene0003274;Unigene0005012;Unigene0005032;Unigene0014674;Unigene0018566;Unigene0021127;Unigene0021620;Unigene0021798;Unigene0023849;Unigene0028817;Unigene0030172;Unigene0032601;Unigene0033845;Unigene0033990;Unigene0036088;Unigene0037968;Unigene0040627	K11262+K00232+K10251+K00208+K00648+K01897+K10527+K01897+K01961+K01962+K01962+K03921+K00249+K09458+K07512+K00232+K00645+K01897+K10781+K00232+K00232
Fatty acid biosynthesis	13	46	0.310695	0.636185	ko00061	Unigene0000628;Unigene0002537;Unigene0003274;Unigene0005012;Unigene0014674;Unigene0018566;Unigene0021127;Unigene0021620;Unigene0021798;Unigene0028817;Unigene0033845;Unigene0033990;Unigene0036088	K11262+K00208+K00648+K01897+K01897+K01961+K01962+K01962+K03921+K09458+K00645+K01897+K10781
Pantothenate and CoA biosynthesis	11	39	0.335918	0.677084	ko00770	Unigene0001340;Unigene0004863;Unigene0006044;Unigene0008033;Unigene0010095;Unigene0018768;Unigene0020814;Unigene0034824;Unigene0035042;Unigene0036456;Unigene0039639	K01687+K06133+K01653+K00826+K00826+K01918+K01431+K01513+K01464+K09680+K00053
Caffeine metabolism	2	5	0.350445	0.685632	ko00232	Unigene0026612;Unigene0041013	K00365+K00106
Arachidonic acid metabolism	6	20	0.350789	0.685632	ko00590	Unigene0001410;Unigene0011553;Unigene0013377;Unigene0031434;Unigene0034709;Unigene0036516	K00079+K01254+K15730+K00432+K14674+K05309
Carbon fixation in photosynthetic organisms	24	92	0.374474	0.715326	ko00710	Unigene0000205;Unigene0001192;Unigene0004012;Unigene0004550;Unigene0009289;Unigene0011359;Unigene0012780;Unigene0015645;Unigene0016006;Unigene0016767;Unigene0019140;Unigene0020423;Unigene0020707;Unigene0022493;Unigene0022638;Unigene0026156;Unigene0031100;Unigene0034181;Unigene0035799;Unigene0038575;Unigene0040301;Unigene0040674;Unigene0041221;Unigene0042657	K00814+K00026+K00051+K03841+K00026+K00615+K00026+K14272+K01006+K01803+K01601+K14454+K00029+K00134+K00927+K14455+K03841+K01623+K00028+K01783+K03841+K01595+K01807+K00028
Phosphonate and phosphinate metabolism	3	9	0.377071	0.715326	ko00440	Unigene0006938;Unigene0025381;Unigene0035873	K00968+K00993+K00967
Glyoxylate and dicarboxylate metabolism	24	93	0.397429	0.74302	ko00630	Unigene0000595;Unigene0001192;Unigene0002400;Unigene0002574;Unigene0003287;Unigene0006436;Unigene0008812;Unigene0009289;Unigene0010076;Unigene0010096;Unigene0012166;Unigene0012780;Unigene0015645;Unigene0016635;Unigene0017476;Unigene0019140;Unigene0034871;Unigene0035524;Unigene0036871;Unigene0038813;Unigene0038862;Unigene0039189;Unigene0039674;Unigene0043367	K00281+K00026+K00382+K01647+K18121+K00605+K00284+K00026+K00830+K01895+K00600+K00026+K14272+K02437+K19269+K01601+K15918+K01647+K01915+K15919+K19269+K01913+K18121+K01433
Glycine, serine and threonine metabolism	23	90	0.421909	0.773444	ko00260	Unigene0000063;Unigene0000595;Unigene0001393;Unigene0002400;Unigene0002707;Unigene0006436;Unigene0010076;Unigene0011482;Unigene0012166;Unigene0015645;Unigene0016220;Unigene0016635;Unigene0021976;Unigene0022288;Unigene0022694;Unigene0028462;Unigene0030043;Unigene0034871;Unigene0035653;Unigene0036343;Unigene0038813;Unigene0039440;Unigene0041261	K12524+K00281+K00928+K00382+K01695+K00605+K00830+K01696+K00600+K14272+K00130+K02437+K01754+K00276+K00831+K01733+K01834+K15918+K01620+K00827+K15919+K01834+K01733
DNA replication	24	95	0.443761	0.773444	ko03030	Unigene0001097;Unigene0002119;Unigene0005140;Unigene0006488;Unigene0007265;Unigene0008261;Unigene0009692;Unigene0013076;Unigene0014857;Unigene0016973;Unigene0021893;Unigene0025311;Unigene0026866;Unigene0028763;Unigene0029140;Unigene0029451;Unigene0029976;Unigene0032304;Unigene0032723;Unigene0034599;Unigene0037064;Unigene0039891;Unigene0040556;Unigene0041370	K02326+K10755+K07466+K10755+K10743+K02335+K10755+K03111+K10739+K10747+K07466+K10754+K03505+K03506+K07466+K10740+K03504+K02327+K10747+K02328+K03505+K04799+K04802+K10756
Tropane, piperidine and pyridine alkaloid biosynthesis	7	26	0.446754	0.773444	ko00960	Unigene0018769;Unigene0019303;Unigene0020423;Unigene0022288;Unigene0026156;Unigene0037491;Unigene0038205	K00817+K00811+K14454+K00276+K14455+K00815+K08081
Butanoate metabolism	6	22	0.448312	0.773444	ko00650	Unigene0000574;Unigene0003287;Unigene0005840;Unigene0006044;Unigene0028048;Unigene0039674	K01641+K18121+K01580+K01653+K00074+K18121
Riboflavin metabolism	6	22	0.448312	0.773444	ko00740	Unigene0005770;Unigene0011643;Unigene0018267;Unigene0024527;Unigene0034824;Unigene0041740	K11752+K00794+K11752+K14379+K01513+K18453
Biotin metabolism	5	18	0.449676	0.773444	ko00780	Unigene0002537;Unigene0024416;Unigene0028817;Unigene0030407;Unigene0038675	K00208+K00652+K09458+K01012+K19562
Fructose and mannose metabolism	22	88	0.471818	0.800849	ko00051	Unigene0004550;Unigene0006207;Unigene0008684;Unigene0009339;Unigene0013218;Unigene0015211;Unigene0016767;Unigene0018379;Unigene0021166;Unigene0022202;Unigene0023581;Unigene0023822;Unigene0024136;Unigene0031100;Unigene0034181;Unigene0034463;Unigene0036193;Unigene0037651;Unigene0038019;Unigene0040301;Unigene0041523;Unigene0042065	K03841+K00966+K00008+K00850+K00847+K01711+K01803+K00863+K00850+K00895+K00847+K18447+K00844+K03841+K01623+K01103+K01805+K19355+K05305+K03841+K19355+K00850
Arginine and proline metabolism	18	73	0.50941	0.853426	ko00330	Unigene0002736;Unigene0006951;Unigene0011102;Unigene0013260;Unigene0018227;Unigene0019303;Unigene0020423;Unigene0020664;Unigene0026156;Unigene0026636;Unigene0027732;Unigene0032737;Unigene0039199;Unigene0041009;Unigene0041528;Unigene0041941;Unigene0043061;Unigene0043456	K00286+K00294+K13366+K00472+K13427+K00811+K14454+K00797+K14455+K00472+K10536+K00797+K00286+K17839+K00128+K00472+K01259+K00128
Sulfur metabolism	12	49	0.536775	0.882177	ko00920	Unigene0000023;Unigene0008157;Unigene0015371;Unigene0025789;Unigene0025836;Unigene0026364;Unigene0028798;Unigene0029941;Unigene0036689;Unigene0037584;Unigene0037807;Unigene0043328	K00640+K00387+K00640+K00392+K13811+K01739+K15422+K05907+K01011+K00640+K01738+K13034
RNA polymerase	17	70	0.540248	0.882177	ko03020	Unigene0000544;Unigene0002712;Unigene0007627;Unigene0011882;Unigene0013262;Unigene0013813;Unigene0015125;Unigene0022792;Unigene0027584;Unigene0032419;Unigene0033889;Unigene0034523;Unigene0036686;Unigene0037559;Unigene0037566;Unigene0039173;Unigene0039277	K03006+K03005+K02999+K03019+K03002+K03013+K03015+K03021+K03025+K03017+K03010+K03016+K03020+K03012+K03023+K03026+K03024
Carotenoid biosynthesis	10	41	0.549373	0.885227	ko00906	Unigene0004572;Unigene0005869;Unigene0008197;Unigene0017012;Unigene0020382;Unigene0026527;Unigene0032183;Unigene0040511;Unigene0041124;Unigene0041397	K06443+K09835+K09840+K09843+K02293+K09837+K09841+K15744+K06444+K00514
Flavone and flavonol biosynthesis	1	3	0.564656	0.885227	ko00944	Unigene0026388	K05280
Steroid biosynthesis	8	33	0.565203	0.885227	ko00100	Unigene0005198;Unigene0008723;Unigene0009051;Unigene0012717;Unigene0034709;Unigene0035008;Unigene0038114;Unigene0042634	K00227+K01824+K09828+K00801+K14674+K07748+K08246+K00222
Circadian rhythm - plant	11	46	0.575546	0.885227	ko04712	Unigene0005308;Unigene0015069;Unigene0016098;Unigene0016145;Unigene0022115;Unigene0022756;Unigene0022763;Unigene0026496;Unigene0030854;Unigene0038779;Unigene0039778	K10143+K16221+K16240+K12130+K12118+K12115+K12129+K12124+K12127+K03097+K12119
Citrate cycle (TCA cycle)	20	84	0.576427	0.885227	ko00020	Unigene0001192;Unigene0002400;Unigene0002574;Unigene0005177;Unigene0008566;Unigene0009289;Unigene0012780;Unigene0012900;Unigene0013089;Unigene0017239;Unigene0019624;Unigene0020404;Unigene0021256;Unigene0021645;Unigene0022475;Unigene0034613;Unigene0035117;Unigene0035128;Unigene0035524;Unigene0040590	K00026+K00382+K01647+K00627+K00162+K00026+K00026+K00234+K01899+K00161+K00030+K00162+K00031+K00658+K00031+K00627+K01900+K01648+K01647+K01679
Ubiquinone and other terpenoid-quinone biosynthesis	13	55	0.591503	0.897693	ko00130	Unigene0003899;Unigene0004483;Unigene0011248;Unigene0016208;Unigene0016773;Unigene0020461;Unigene0022177;Unigene0024419;Unigene0031520;Unigene0036362;Unigene0037491;Unigene0037799;Unigene0040454	K14760+K00487+K12502+K05928+K06126+K03809+K00591+K01904+K06127+K03809+K00815+K01904+K01904
Glycosphingolipid biosynthesis - globo and isoglobo series	2	8	0.612974	0.919461	ko00603	Unigene0024879;Unigene0024967	K12373+K07407
Phenylalanine metabolism	13	56	0.620298	0.919753	ko00360	Unigene0004483;Unigene0018769;Unigene0019303;Unigene0020423;Unigene0022288;Unigene0024419;Unigene0026156;Unigene0028048;Unigene0034207;Unigene0037491;Unigene0037799;Unigene0040454;Unigene0041756	K00487+K00817+K00811+K14454+K00276+K01904+K14455+K00074+K07253+K00815+K01904+K01904+K00588
Lysine degradation	14	61	0.639703	0.937747	ko00310	Unigene0000351;Unigene0001046;Unigene0007694;Unigene0010404;Unigene0011306;Unigene0012177;Unigene0021645;Unigene0033739;Unigene0034366;Unigene0036974;Unigene0037429;Unigene0039180;Unigene0041528;Unigene0043456	K11423+K22748+K19199+K14157+K11420+K19199+K00658+K11430+K11430+K11423+K11423+K18826+K00128+K00128
Other types of O-glycan biosynthesis	4	19	0.710773	1	ko00514	Unigene0008451;Unigene0012575;Unigene0039233;Unigene0039684	K09667+K20784+K09667+K20782
Brassinosteroid biosynthesis	5	24	0.724936	1	ko00905	Unigene0008046;Unigene0019839;Unigene0023955;Unigene0029347;Unigene0040815	K09590+K12637+K09587+K09591+K20623
Ubiquitin mediated proteolysis	39	173	0.725193	1	ko04120	Unigene0000008;Unigene0000103;Unigene0001560;Unigene0004118;Unigene0004121;Unigene0005308;Unigene0005459;Unigene0008450;Unigene0008466;Unigene0009710;Unigene0009843;Unigene0010519;Unigene0011158;Unigene0013426;Unigene0018601;Unigene0019876;Unigene0024082;Unigene0027025;Unigene0027712;Unigene0029944;Unigene0031973;Unigene0033634;Unigene0033939;Unigene0034473;Unigene0035066;Unigene0037878;Unigene00…	K10597+K03355+K10686+K03094+K03094+K10143+K03364+K10609+K10144+K04506+K03351+K10580+K10144+K10685+K03353+K06689+K03350+K10575+K10598+K03094+K10601+K10581+K04506+K03354+K10610+K10604+K10590+K20217+K04506+K03354+K03357+K10599+K10573+K10589+K03363+K10588+K10604+K06688+K03349
Biosynthesis of unsaturated fatty acids	6	29	0.738082	1	ko01040	Unigene0001373;Unigene0002111;Unigene0021798;Unigene0032601;Unigene0037968;Unigene0040627	K00232+K10251+K03921+K00232+K00232+K00232
Lipoic acid metabolism	1	5	0.749998	1	ko00785	Unigene0040121	K03644
Photosynthesis - antenna proteins	4	20	0.750277	1	ko00196	Unigene0006716;Unigene0024585;Unigene0034950;Unigene0036938	K08908+K08912+K08908+K14172
Glycerophospholipid metabolism	27	123	0.753842	1	ko00564	Unigene0000049;Unigene0003490;Unigene0003491;Unigene0006888;Unigene0006938;Unigene0013391;Unigene0016967;Unigene0018477;Unigene0019980;Unigene0021057;Unigene0022010;Unigene0022759;Unigene0022967;Unigene0024468;Unigene0025381;Unigene0026521;Unigene0032727;Unigene0034650;Unigene0034709;Unigene0035464;Unigene0035873;Unigene0036747;Unigene0038399;Unigene0039842;Unigene0042053;Unigene0042061;Unigene00…	K22389+K01114+K01114+K01517+K00968+K06130+K00981+K13519+K08730+K15728+K01613+K00550+K00995+K18693+K00993+K13508+K13513+K05929+K14674+K00981+K00967+K00901+K13523+K00630+K01115+K01613+K00655
Inositol phosphate metabolism	21	99	0.791807	1	ko00562	Unigene0000222;Unigene0001842;Unigene0003490;Unigene0003491;Unigene0009340;Unigene0016767;Unigene0017049;Unigene0022324;Unigene0024289;Unigene0024656;Unigene0025463;Unigene0028798;Unigene0030525;Unigene0033207;Unigene0033418;Unigene0034386;Unigene0034521;Unigene0034951;Unigene0035621;Unigene0041582;Unigene0041660	K00888+K00913+K01114+K01114+K01092+K01803+K00913+K00140+K00889+K01858+K00914+K15422+K19801+K03103+K05857+K10572+K00921+K00915+K01765+K18649+K00140
Photosynthesis	15	73	0.806718	1	ko00195	Unigene0008051;Unigene0012184;Unigene0014702;Unigene0016234;Unigene0018906;Unigene0021673;Unigene0022957;Unigene0026435;Unigene0027012;Unigene0028832;Unigene0036621;Unigene0040707;Unigene0041275;Unigene0042004;Unigene0042524	K02639+K02109+K02695+K02639+K02635+K08906+K08901+K02115+K02639+K02705+K02115+K02694+K02111+K08901+K02703
Ascorbate and aldarate metabolism	11	56	0.830428	1	ko00053	Unigene0000962;Unigene0004504;Unigene0009068;Unigene0034791;Unigene0035781;Unigene0036375;Unigene0038598;Unigene0041460;Unigene0041528;Unigene0041582;Unigene0043456	K16190+K00012+K08232+K14190+K08232+K00434+K00225+K12447+K00128+K18649+K00128
Ether lipid metabolism	6	33	0.845272	1	ko00565	Unigene0003490;Unigene0003491;Unigene0018477;Unigene0025381;Unigene0034709;Unigene0042053	K01114+K01114+K13519+K00993+K14674+K01115
SNARE interactions in vesicular transport	9	48	0.855413	1	ko04130	Unigene0004973;Unigene0005430;Unigene0018284;Unigene0020223;Unigene0021753;Unigene0033994;Unigene0035163;Unigene0036620;Unigene0037992	K08503+K08495+K08486+K08515+K08490+K08488+K08490+K08517+K08515
Synthesis and degradation of ketone bodies	1	7	0.856462	1	ko00072	Unigene0000574	K01641
Indole alkaloid biosynthesis	1	7	0.856462	1	ko00901	Unigene0038924	K21026
Phosphatidylinositol signaling system	19	100	0.913347	1	ko04070	Unigene0000222;Unigene0001842;Unigene0009340;Unigene0010785;Unigene0013380;Unigene0016967;Unigene0017049;Unigene0024289;Unigene0025463;Unigene0028798;Unigene0030525;Unigene0033418;Unigene0034386;Unigene0034521;Unigene0034951;Unigene0035441;Unigene0035464;Unigene0036747;Unigene0041582	K00888+K00913+K01092+K13024+K02183+K00981+K00913+K00889+K00914+K15422+K19801+K05857+K10572+K00921+K00915+K02183+K00981+K00901+K18649
Starch and sucrose metabolism	35	178	0.938965	1	ko00500	Unigene0002053;Unigene0002590;Unigene0002626;Unigene0002970;Unigene0003417;Unigene0003824;Unigene0004590;Unigene0005611;Unigene0008785;Unigene0013218;Unigene0014753;Unigene0015870;Unigene0018554;Unigene0018605;Unigene0019474;Unigene0023581;Unigene0023822;Unigene0024136;Unigene0025106;Unigene0025585;Unigene0026990;Unigene0027387;Unigene0034795;Unigene0034824;Unigene0035136;Unigene0036307;Unigene00…	K00963+K01188+K01194+K00975+K01835+K01187+K00705+K01193+K00963+K00847+K01835+K19893+K00700+K01214+K01176+K00847+K18447+K00844+K01810+K00688+K00705+K00703+K05349+K01513+K05349+K01188+K13679+K05350+K00975+K01214+K00700+K01188+K00700+K05349+K00703
Pentose and glucuronate interconversions	15	87	0.955263	1	ko00040	Unigene0000962;Unigene0001248;Unigene0002053;Unigene0003721;Unigene0004504;Unigene0008684;Unigene0008785;Unigene0010594;Unigene0011470;Unigene0027697;Unigene0036193;Unigene0038575;Unigene0039623;Unigene0041460;Unigene0042370	K16190+K01051+K00963+K01213+K00012+K00008+K00963+K00002+K01051+K01051+K01805+K01783+K01728+K12447+K01051
Flavonoid biosynthesis	10	63	0.960824	1	ko00941	Unigene0003122;Unigene0004483;Unigene0012842;Unigene0020527;Unigene0023314;Unigene0026388;Unigene0031333;Unigene0032205;Unigene0040325;Unigene0041756	K13082+K00487+K05278+K00475+K13065+K05280+K01859+K13065+K08695+K00588
Taurine and hypotaurine metabolism	1	12	0.964179	1	ko00430	Unigene0005840	K01580
Phagosome	19	110	0.9698	1	ko04145	Unigene0000086;Unigene0003466;Unigene0005135;Unigene0010772;Unigene0015498;Unigene0022769;Unigene0025463;Unigene0030270;Unigene0032712;Unigene0033090;Unigene0033679;Unigene0033994;Unigene0034521;Unigene0036171;Unigene0036619;Unigene0036620;Unigene0037204;Unigene0040388;Unigene0042920	K02152+K08057+K02148+K10956+K02145+K09481+K00914+K02147+K07375+K08057+K07374+K08488+K00921+K08054+K02144+K08517+K02149+K02151+K02146
Zeatin biosynthesis	2	20	0.971262	1	ko00908	Unigene0011292;Unigene0018704	K10760+K00791
Oxidative phosphorylation	35	187	0.971692	1	ko00190	Unigene0000017;Unigene0000086;Unigene0002559;Unigene0003649;Unigene0005135;Unigene0008665;Unigene0010714;Unigene0010957;Unigene0011537;Unigene0011685;Unigene0012184;Unigene0012900;Unigene0015498;Unigene0017080;Unigene0017592;Unigene0019334;Unigene0020143;Unigene0021228;Unigene0026435;Unigene0026780;Unigene0027328;Unigene0028143;Unigene0030270;Unigene0031726;Unigene0032860;Unigene0034110;Unigene00…	K03934+K02152+K01507+K03941+K02148+K03953+K02266+K02138+K03949+K00413+K02109+K00234+K02145+K03939+K05582+K03942+K00411+K03940+K02115+K03946+K03955+K00411+K02147+K02135+K02132+K00416+K02258+K02144+K02115+K02149+K02151+K02111+K02259+K02256+K02146
Diterpenoid biosynthesis	3	27	0.974677	1	ko00904	Unigene0002186;Unigene0008467;Unigene0034977	K04122+K04123+K17961
Glutathione metabolism	20	117	0.97621	1	ko00480	Unigene0002131;Unigene0005791;Unigene0006258;Unigene0006900;Unigene0007976;Unigene0010261;Unigene0011080;Unigene0013001;Unigene0013688;Unigene0016912;Unigene0020664;Unigene0021256;Unigene0022475;Unigene0023414;Unigene0026421;Unigene0031434;Unigene0032737;Unigene0036297;Unigene0036375;Unigene0042722	K00799+K00036+K00033+K10807+K01255+K00036+K00799+K01256+K01919+K00033+K00797+K00031+K00031+K21456+K00799+K00432+K00797+K10808+K00434+K01469
Sesquiterpenoid and triterpenoid biosynthesis	2	21	0.977295	1	ko00909	Unigene0012717;Unigene0014730	K00801+K15891
Fatty acid elongation	5	40	0.979369	1	ko00062	Unigene0002111;Unigene0009484;Unigene0015929;Unigene0030172;Unigene0033966	K10251+K15397+K01076+K07512+K15397
Monoterpenoid biosynthesis	1	14	0.979448	1	ko00902	Unigene0020027	K15095
alpha-Linolenic acid metabolism	10	69	0.983595	1	ko00592	Unigene0000049;Unigene0001373;Unigene0005032;Unigene0005397;Unigene0032601;Unigene0034709;Unigene0035504;Unigene0037968;Unigene0040627;Unigene0040737	K22389+K00232+K10527+K00454+K00232+K14674+K10526+K00232+K00232+K10528
Stilbenoid, diarylheptanoid and gingerol biosynthesis	4	37	0.988432	1	ko00945	Unigene0004483;Unigene0023314;Unigene0032205;Unigene0041756	K00487+K13065+K13065+K00588
Tryptophan metabolism	6	49	0.98851	1	ko00380	Unigene0004204;Unigene0016992;Unigene0031293;Unigene0038346;Unigene0041528;Unigene0043456	K11820+K11820+K22450+K22450+K00128+K00128
Cyanoamino acid metabolism	9	72	0.995816	1	ko00460	Unigene0002590;Unigene0012166;Unigene0034795;Unigene0035136;Unigene0036307;Unigene0038394;Unigene0041721;Unigene0041950;Unigene0043328	K01188+K00600+K05349+K05349+K01188+K05350+K01188+K05349+K13034
ABC transporters	6	56	0.996904	1	ko02010	Unigene0009253;Unigene0012156;Unigene0020462;Unigene0021451;Unigene0033705;Unigene0034418	K05656+K05655+K05658+K05674+K05643+K05663
Endocytosis	49	277	0.996949	1	ko04144	Unigene0000176;Unigene0001730;Unigene0003341;Unigene0004503;Unigene0005284;Unigene0006150;Unigene0007396;Unigene0008502;Unigene0010274;Unigene0010543;Unigene0011669;Unigene0013190;Unigene0013986;Unigene0014725;Unigene0015748;Unigene0016884;Unigene0017247;Unigene0017504;Unigene0019888;Unigene0021275;Unigene0023042;Unigene0023994;Unigene0024207;Unigene0024289;Unigene0026415;Unigene0026433;Unigene00…	K03283+K19476+K15053+K12195+K18466+K10396+K12486+K12200+K12486+K19476+K05755+K12479+K12471+K12197+K12191+K07904+K07904+K12198+K12193+K11824+K12185+K07937+K12196+K00889+K03283+K12471+K12489+K07904+K12189+K11826+K19366+K19476+K11827+K07904+K01528+K12489+K05758+K10364+K19366+K05757+K10365+K12486+K05756+K01115+K07904+K11866+K12190+K03283+K03283
Protein processing in endoplasmic reticulum	72	390	0.997934	1	ko04141	Unigene0000008;Unigene0000175;Unigene0000176;Unigene0000601;Unigene0001257;Unigene0002178;Unigene0002411;Unigene0002719;Unigene0002762;Unigene0003050;Unigene0003466;Unigene0004026;Unigene0004118;Unigene0004121;Unigene0004630;Unigene0005122;Unigene0005617;Unigene0007486;Unigene0008142;Unigene0010772;Unigene0012135;Unigene0012158;Unigene0012294;Unigene0012709;Unigene0014635;Unigene0015372;Unigene00…	K10597+K11718+K03283+K14005+K13719+K09580+K08653+K09540+K14018+K12666+K08057+K14004+K03094+K03094+K10085+K08288+K13249+K10666+K08852+K10956+K13989+K01228+K10636+K09523+K12275+K07765+K13989+K07151+K12670+K09518+K06689+K10666+K09517+K12667+K13993+K09481+K13993+K03283+K10575+K13993+K10661+K13993+K09486+K09487+K09562+K03094+K09487+K05546+K10601+K08057+K14016+K14016+K10839+K04523+K14026+K08054+K10084+…
MAPK signaling pathway - plant	30	189	0.998252	1	ko04016	Unigene0000098;Unigene0000119;Unigene0001067;Unigene0002534;Unigene0003070;Unigene0004811;Unigene0009941;Unigene0013380;Unigene0015126;Unigene0016237;Unigene0016467;Unigene0016547;Unigene0019157;Unigene0021865;Unigene0023192;Unigene0023517;Unigene0028931;Unigene0031454;Unigene0034264;Unigene0035441;Unigene0036138;Unigene0036507;Unigene0036642;Unigene0037819;Unigene0038140;Unigene0038459;Unigene00…	K14509+K14514+K13420+K20538+K20714+K14496+K20725+K02183+K13422+K14516+K20718+K14514+K20538+K20553+K13414+K14497+K20536+K13449+K20717+K02183+K20725+K20726+K20717+K17686+K20606+K13424+K14510+K14498+K13414+K17686
Linoleic acid metabolism	2	33	0.998795	1	ko00591	Unigene0005397;Unigene0034709	K00454+K14674
Cutin, suberine and wax biosynthesis	1	29	0.999683	1	ko00073	Unigene0018243	K17991
Plant hormone signal transduction	45	290	0.999919	1	ko04075	Unigene0000098;Unigene0000119;Unigene0001690;Unigene0002799;Unigene0003373;Unigene0003750;Unigene0003978;Unigene0004811;Unigene0005534;Unigene0006294;Unigene0006579;Unigene0007026;Unigene0007750;Unigene0011375;Unigene0012528;Unigene0015126;Unigene0016237;Unigene0016547;Unigene0017448;Unigene0019371;Unigene0019611;Unigene0021074;Unigene0022585;Unigene0022586;Unigene0022687;Unigene0023517;Unigene00…	K14509+K14514+K13464+K14488+K14493+K14487+K14431+K14496+K14491+K13464+K14491+K14431+K13464+K14484+K14484+K13422+K14516+K14514+K14432+K13415+K14488+K14486+K14488+K14488+K14508+K14497+K13946+K14488+K14484+K13449+K14491+K14432+K14503+K14485+K14494+K14486+K14489+K14510+K14498+K14506+K14432+K14488+K14488+K13464+K14486
Plant-pathogen interaction	68	413	0.999969	1	ko04626	Unigene0001067;Unigene0001437;Unigene0002128;Unigene0002129;Unigene0003073;Unigene0004064;Unigene0004733;Unigene0005234;Unigene0005295;Unigene0006158;Unigene0006270;Unigene0007076;Unigene0007603;Unigene0007984;Unigene0009484;Unigene0010101;Unigene0010406;Unigene0011257;Unigene0013380;Unigene0013756;Unigene0014844;Unigene0015314;Unigene0017268;Unigene0017363;Unigene0017614;Unigene0018227;Unigene00…	K13420+K09422+K13434+K13434+K02358+K09422+K09422+K09422+K09422+K02358+K13412+K09422+K13448+K09422+K15397+K13448+K00864+K13412+K02183+K13448+K12795+K13459+K09422+K09422+K09422+K13427+K13448+K09422+K09422+K13436+K02358+K13412+K13414+K13448+K13448+K13448+K13459+K20536+K13448+K09487+K09487+K13449+K09422+K13457+K15397+K05391+K13412+K13412+K13412+K09422+K09422+K09422+K02183+K13457+K05391+K13448+K09422+…
Phenylpropanoid biosynthesis	21	175	0.999987	1	ko00940	Unigene0002590;Unigene0002706;Unigene0004483;Unigene0005205;Unigene0006810;Unigene0007577;Unigene0023314;Unigene0024419;Unigene0024680;Unigene0028940;Unigene0029995;Unigene0032205;Unigene0034795;Unigene0035136;Unigene0036307;Unigene0037799;Unigene0038394;Unigene0040454;Unigene0041721;Unigene0041756;Unigene0041950	K01188+K18368+K00487+K00430+K00083+K00430+K13065+K01904+K00430+K12356+K22395+K13065+K05349+K05349+K01188+K01904+K05350+K01904+K01188+K00588+K05349
Ribosome	59	457	1	1	ko03010	Unigene0001770;Unigene0003131;Unigene0004511;Unigene0005958;Unigene0006413;Unigene0006936;Unigene0008500;Unigene0008959;Unigene0010197;Unigene0010321;Unigene0010704;Unigene0011566;Unigene0011641;Unigene0011677;Unigene0011866;Unigene0012854;Unigene0013443;Unigene0014959;Unigene0016097;Unigene0016131;Unigene0016726;Unigene0016979;Unigene0017005;Unigene0017897;Unigene0018720;Unigene0018722;Unigene00…	K02923+K02881+K02988+K02871+K02863+K02948+K02937+K02981+K02922+K02950+K02911+K02941+K02985+K02887+K02899+K02975+K02935+K02904+K02868+K02910+K02897+K02892+K02893+K02949+K02881+K02881+K02930+K02930+K02883+K02935+K02872+K02908+K02902+K02906+K02896+K02974+K02942+K02990+K02984+K02867+K02921+K02995+K02940+K02934+K02935+K02906+K02936+K02946+K02935+K02989+K02882+K02987+K02903+K02896+K02939+K02976+K02864+…

## Sheet: XZSS
KEGG analysis result for single-copy genes in Chaenomeles thibetica(XZSS)
Pathway	out (1526)	All (5807)	Pvalue	Qvalue	Pathway ID	Genes	K_IDs
Non-homologous end-joining	8	8	2.24354e-05	0.00289417	ko03450	Unigene0001931;Unigene0011466;Unigene0031197;Unigene0033185;Unigene0034797;Unigene0034914;Unigene0035056;Unigene0035124	K03512+K10866+K10886+K10777+K10885+K10865+K04799+K10884
Base excision repair	24	48	0.000355229	0.0204003	ko03410	Unigene0001782;Unigene0001931;Unigene0002962;Unigene0003652;Unigene0006999;Unigene0008020;Unigene0013131;Unigene0013806;Unigene0014658;Unigene0015665;Unigene0016228;Unigene0016844;Unigene0023813;Unigene0026751;Unigene0026784;Unigene0028111;Unigene0028261;Unigene0031370;Unigene0034416;Unigene0035056;Unigene0035480;Unigene0036238;Unigene0036593;Unigene0037973	K02335+K03512+K10803+K01246+K01247+K10801+K02327+K03660+K10747+K02326+K10773+K03504+K04802+K03506+K03648+K01246+K03505+K10747+K02328+K04799+K03575+K01142+K03505+K01247
Spliceosome	88	247	0.000582334	0.0204003	ko03040	Unigene0000887;Unigene0001012;Unigene0001057;Unigene0001326;Unigene0001374;Unigene0001655;Unigene0002770;Unigene0002897;Unigene0003063;Unigene0003578;Unigene0004325;Unigene0004833;Unigene0005039;Unigene0005237;Unigene0005614;Unigene0005615;Unigene0006393;Unigene0006454;Unigene0006674;Unigene0006716;Unigene0007836;Unigene0008358;Unigene0008972;Unigene0009263;Unigene0009693;Unigene0009799;Unigene00…	K12818+K12860+K12855+K06063+K12741+K12896+K13025+K12896+K12830+K12870+K12818+K12857+K03283+K09564+K12812+K12812+K12825+K12818+K12900+K12817+K03283+K11099+K12856+K12831+K03283+K12867+K12820+K12823+K12879+K12829+K12843+K12897+K12662+K12837+K12823+K11088+K12890+K12833+K12858+K12839+K12828+K12823+K12741+K12823+K12863+K12868+K11097+K12830+K11092+K12852+K12741+K12821+K12836+K12882+K12844+K12823+K12850+…
Purine metabolism	74	202	0.000632567	0.0204003	ko00230	Unigene0000955;Unigene0001273;Unigene0001782;Unigene0002366;Unigene0002469;Unigene0002716;Unigene0003606;Unigene0003814;Unigene0006749;Unigene0007115;Unigene0007147;Unigene0007148;Unigene0007588;Unigene0007689;Unigene0009348;Unigene0009421;Unigene0013131;Unigene0013802;Unigene0014798;Unigene0014850;Unigene0015218;Unigene0015665;Unigene0016208;Unigene0016528;Unigene0016844;Unigene0018012;Unigene00…	K03006+K01490+K02335+K13811+K01081+K01514+K00873+K03002+K01951+K03015+K00873+K00873+K03005+K10808+K03024+K00602+K02327+K03025+K18453+K01490+K02083+K02326+K18447+K01835+K03504+K01510+K03026+K01510+K00951+K01519+K03021+K03019+K00948+K14641+K00365+K01517+K03016+K00939+K03506+K03013+K01939+K00939+K03505+K03787+K01513+K03010+K03020+K01756+K10807+K00764+K11808+K00873+K00951+K03017+K00873+K06928+K02999+…
Biosynthesis of amino acids	97	280	0.000927591	0.0239318	ko01230	Unigene0000828;Unigene0001040;Unigene0001045;Unigene0001150;Unigene0001244;Unigene0002025;Unigene0002123;Unigene0002404;Unigene0003606;Unigene0004815;Unigene0005221;Unigene0005326;Unigene0005578;Unigene0006054;Unigene0006202;Unigene0006961;Unigene0007015;Unigene0007147;Unigene0007148;Unigene0007323;Unigene0007383;Unigene0007701;Unigene0008681;Unigene0008971;Unigene0010575;Unigene0011183;Unigene00…	K10206+K01689+K00264+K14454+K01626+K00850+K14272+K00826+K00873+K01760+K00891+K01834+K01704+K01733+K15227+K01623+K00814+K00873+K00873+K00800+K00600+K01940+K01754+K00052+K01620+K00789+K01647+K01663+K00053+K01803+K00030+K01807+K00145+K00765+K00640+K00927+K00031+K00615+K00826+K00811+K01817+K00215+K00286+K01649+K00616+K18649+K00948+K01783+K01626+K01626+K01647+K01814+K01735+K01693+K00850+K01714+K00616+…
Nucleotide excision repair	36	86	0.00112682	0.0242267	ko03420	Unigene0001512;Unigene0001782;Unigene0003953;Unigene0010887;Unigene0011171;Unigene0011637;Unigene0011809;Unigene0013131;Unigene0014105;Unigene0014658;Unigene0015665;Unigene0015954;Unigene0016161;Unigene0016774;Unigene0016844;Unigene0018420;Unigene0023813;Unigene0026751;Unigene0027231;Unigene0028261;Unigene0030062;Unigene0030626;Unigene0031370;Unigene0032881;Unigene0033919;Unigene0034239;Unigene00…	K10740+K02335+K07466+K10843+K10609+K10739+K10846+K02327+K10848+K10747+K02326+K10838+K10840+K10755+K03504+K10841+K04802+K03506+K07466+K03505+K10754+K10755+K10747+K10839+K03141+K03143+K10756+K02328+K10610+K10839+K03505+K10755+K07466+K06634+K10844+K02202
Ribosome biogenesis in eukaryotes	39	96	0.00141553	0.0260863	ko03008	Unigene0000317;Unigene0001545;Unigene0002099;Unigene0003094;Unigene0003329;Unigene0004227;Unigene0005172;Unigene0006942;Unigene0007035;Unigene0008951;Unigene0012267;Unigene0014367;Unigene0014723;Unigene0017026;Unigene0018217;Unigene0019339;Unigene0019676;Unigene0019959;Unigene0023134;Unigene0028716;Unigene0029344;Unigene0029728;Unigene0030014;Unigene0030666;Unigene0031039;Unigene0031984;Unigene00…	K14554+K14556+K03097+K14565+K14548+K14550+K11108+K14574+K14572+K11130+K14569+K14558+K14567+K14559+K14290+K14563+K07936+K14536+K14571+K14552+K14561+K07562+K14549+K12619+K11131+K01164+K14521+K14537+K03537+K14546+K14538+K14568+K06943+K14566+K14560+K06943+K14573+K03538+K03539
Valine, leucine and isoleucine biosynthesis	10	16	0.00244328	0.0393979	ko00290	Unigene0002404;Unigene0005578;Unigene0008681;Unigene0008971;Unigene0011940;Unigene0018225;Unigene0020243;Unigene0027148;Unigene0031875;Unigene0039110	K00826+K01704+K01754+K00052+K00053+K00826+K01649+K01703+K01653+K01687
N-Glycan biosynthesis	24	54	0.00285182	0.0408761	ko00510	Unigene0000923;Unigene0002832;Unigene0008965;Unigene0009245;Unigene0010463;Unigene0010672;Unigene0017382;Unigene0018258;Unigene0021779;Unigene0027629;Unigene0029011;Unigene0031237;Unigene0031539;Unigene0031877;Unigene0032675;Unigene0034145;Unigene0035466;Unigene0035978;Unigene0036218;Unigene0036581;Unigene0036713;Unigene0038535;Unigene0038638;Unigene0039237	K01228+K03843+K01230+K00737+K07151+K12667+K00726+K03849+K12670+K03849+K05546+K03846+K00737+K12666+K00729+K03842+K03847+K00721+K07432+K00737+K01231+K00902+K03850+K09658
Aminoacyl-tRNA biosynthesis	31	76	0.00390787	0.0504115	ko00970	Unigene0000353;Unigene0001029;Unigene0002261;Unigene0002957;Unigene0002967;Unigene0004029;Unigene0007262;Unigene0007560;Unigene0009305;Unigene0013326;Unigene0015137;Unigene0018615;Unigene0020049;Unigene0020377;Unigene0020421;Unigene0021081;Unigene0023175;Unigene0023268;Unigene0024570;Unigene0024651;Unigene0026843;Unigene0029406;Unigene0029993;Unigene0031352;Unigene0034188;Unigene0034349;Unigene00…	K01868+K01872+K01867+K01874+K01881+K01893+K01870+K01875+K01869+K01875+K01883+K01893+K01890+K01869+K02434+K01866+K01886+K01873+K01883+K00604+K01889+K01880+K01873+K01868+K01872+K01874+K01887+K04567+K01876+K01889+K14164
Glucosinolate biosynthesis	5	6	0.00584811	0.0685824	ko00966	Unigene0002404;Unigene0018225;Unigene0018281;Unigene0027148;Unigene0027704	K00826+K00826+K11820+K01703+K11820
RNA transport	78	233	0.00769542	0.0827258	ko03013	Unigene0000014;Unigene0000335;Unigene0000460;Unigene0000949;Unigene0001101;Unigene0002276;Unigene0002281;Unigene0002523;Unigene0002770;Unigene0004083;Unigene0004524;Unigene0004721;Unigene0005004;Unigene0005614;Unigene0005615;Unigene0005793;Unigene0005891;Unigene0007334;Unigene0007869;Unigene0008557;Unigene0009721;Unigene0011793;Unigene0011848;Unigene0014328;Unigene0014563;Unigene0014618;Unigene00…	K14327+K09291+K14289+K14301+K03247+K03250+K14315+K03243+K13025+K14291+K03242+K14312+K14317+K12812+K12812+K03248+K13126+K14293+K14324+K14305+K14004+K14298+K12879+K13126+K14303+K03257+K14318+K14310+K13130+K03113+K13151+K14300+K14290+K14319+K03754+K03262+K07936+K03260+K03260+K03240+K13114+K03239+K03260+K12882+K03246+K14321+K14299+K07562+K12875+K03680+K05019+K03252+K01164+K18213+K14326+K03537+K12876+…
RNA degradation	45	126	0.011493	0.114046	ko03018	Unigene0000300;Unigene0000922;Unigene0001040;Unigene0001240;Unigene0001423;Unigene0001608;Unigene0002025;Unigene0004340;Unigene0005848;Unigene0005891;Unigene0012077;Unigene0012103;Unigene0013578;Unigene0014328;Unigene0014769;Unigene0018591;Unigene0020334;Unigene0021028;Unigene0024669;Unigene0027003;Unigene0027274;Unigene0028754;Unigene0029613;Unigene0030666;Unigene0030777;Unigene0031138;Unigene00…	K12604+K12616+K01689+K12598+K12600+K12587+K00850+K03681+K01148+K13126+K04077+K12580+K12603+K13126+K04077+K12608+K11600+K12585+K00850+K12608+K04077+K12591+K12593+K12619+K12623+K10643+K12607+K00850+K12603+K12603+K12627+K12617+K00962+K12614+K13126+K10643+K03678+K01689+K12605+K12581+K12599+K12598+K00962+K01689+K12581
Terpenoid backbone biosynthesis	22	54	0.0141072	0.127351	ko00900	Unigene0001031;Unigene0003939;Unigene0004389;Unigene0004420;Unigene0007050;Unigene0008966;Unigene0009610;Unigene0010163;Unigene0010931;Unigene0017039;Unigene0019491;Unigene0019496;Unigene0024703;Unigene0028770;Unigene0030475;Unigene0030654;Unigene0031765;Unigene0034795;Unigene0036385;Unigene0038199;Unigene0038485;Unigene0038593	K01662+K01823+K00099+K03526+K11778+K05906+K10960+K01597+K15891+K11778+K00021+K00021+K13789+K01641+K01662+K13789+K05356+K00991+K00919+K05955+K11778+K06013
Mismatch repair	24	61	0.0170853	0.127351	ko03430	Unigene0001512;Unigene0003953;Unigene0007039;Unigene0008627;Unigene0011637;Unigene0013131;Unigene0014658;Unigene0016774;Unigene0016844;Unigene0018395;Unigene0020648;Unigene0023813;Unigene0027231;Unigene0028261;Unigene0030062;Unigene0030626;Unigene0031370;Unigene0031617;Unigene0033054;Unigene0034334;Unigene0034416;Unigene0036593;Unigene0036645;Unigene0037474	K10740+K07466+K08737+K08734+K10739+K02327+K10747+K10755+K03504+K08735+K10858+K04802+K07466+K03505+K10754+K10755+K10747+K07456+K08739+K10756+K02328+K03505+K10755+K07466
Vitamin B6 metabolism	9	17	0.0171364	0.127351	ko00750	Unigene0001841;Unigene0006054;Unigene0013785;Unigene0017622;Unigene0021811;Unigene0026075;Unigene0030527;Unigene0032298;Unigene0037214	K00275+K01733+K06215+K00275+K05275+K08681+K00868+K00831+K01733
Pyruvate metabolism	35	96	0.0172565	0.127351	ko00620	Unigene0000865;Unigene0002146;Unigene0003606;Unigene0006934;Unigene0007147;Unigene0007148;Unigene0007606;Unigene0010389;Unigene0011761;Unigene0012248;Unigene0012649;Unigene0016094;Unigene0016816;Unigene0018408;Unigene0018744;Unigene0018981;Unigene0019211;Unigene0019229;Unigene0020243;Unigene0026137;Unigene0028926;Unigene0028980;Unigene0029536;Unigene0031062;Unigene0031804;Unigene0034197;Unigene00…	K11262+K01895+K00873+K00016+K00873+K00873+K00026+K00029+K01962+K00162+K01512+K00627+K00051+K00627+K01962+K00026+K00028+K00102+K01649+K01006+K01679+K18881+K00382+K00873+K00873+K01595+K00128+K00162+K01913+K00026+K00128+K00161+K01961+K00873+K00028
Propanoate metabolism	17	40	0.01864	0.127351	ko00640	Unigene0000865;Unigene0002146;Unigene0006934;Unigene0008214;Unigene0011761;Unigene0011999;Unigene0018744;Unigene0022623;Unigene0027436;Unigene0029536;Unigene0030137;Unigene0033002;Unigene0034132;Unigene0036917;Unigene0037735;Unigene0037736;Unigene0037809	K11262+K01895+K00016+K05605+K01962+K05605+K01962+K00140+K01578+K00382+K00249+K01900+K01899+K00140+K09699+K01961+K00167
2-Oxocarboxylic acid metabolism	27	71	0.0192795	0.127351	ko01210	Unigene0001150;Unigene0002123;Unigene0002404;Unigene0005578;Unigene0007015;Unigene0008971;Unigene0011716;Unigene0011940;Unigene0012993;Unigene0014872;Unigene0017436;Unigene0018225;Unigene0018281;Unigene0019227;Unigene0020243;Unigene0023399;Unigene0026359;Unigene0026812;Unigene0027148;Unigene0027704;Unigene0029305;Unigene0031875;Unigene0035178;Unigene0037239;Unigene0037924;Unigene0039110;Unigene00…	K14454+K14272+K00826+K01704+K00814+K00052+K01647+K00053+K00030+K00145+K00031+K00826+K11820+K00811+K01649+K01647+K14455+K00930+K01703+K11820+K00031+K01653+K00818+K14677+K14682+K01687+K00928
Glycolysis / Gluconeogenesis	49	143	0.0197443	0.127351	ko00010	Unigene0001007;Unigene0001040;Unigene0002025;Unigene0002146;Unigene0003606;Unigene0004957;Unigene0005326;Unigene0006934;Unigene0006961;Unigene0007147;Unigene0007148;Unigene0009640;Unigene0012248;Unigene0012576;Unigene0016094;Unigene0016528;Unigene0016995;Unigene0017192;Unigene0018408;Unigene0019332;Unigene0024669;Unigene0024725;Unigene0024779;Unigene0026777;Unigene0028769;Unigene0029536;Unigene00…	K01568+K01689+K00850+K01895+K00873+K00002+K01834+K00016+K01623+K00873+K00873+K03841+K00162+K01803+K00627+K01835+K01810+K00927+K00627+K03841+K00850+K01785+K00844+K03841+K01568+K00382+K00895+K00873+K00134+K00850+K00001+K00873+K00131+K01792+K01834+K00128+K00162+K01913+K03103+K01792+K00121+K01689+K00128+K00161+K01792+K01689+K00873+K01835+K00121
Phenylalanine, tyrosine and tryptophan biosynthesis	20	50	0.0232598	0.142882	ko00400	Unigene0001150;Unigene0001244;Unigene0005221;Unigene0006202;Unigene0007323;Unigene0019227;Unigene0019658;Unigene0023003;Unigene0023004;Unigene0023808;Unigene0026359;Unigene0030845;Unigene0032684;Unigene0033515;Unigene0034323;Unigene0034549;Unigene0034679;Unigene0036608;Unigene0038330;Unigene0039481	K14454+K01626+K00891+K15227+K00800+K00811+K01817+K01626+K01626+K01735+K14455+K00817+K01658+K00815+K05359+K01657+K01696+K15227+K01626+K01695
Pyrimidine metabolism	48	142	0.0267833	0.157047	ko00240	Unigene0000955;Unigene0001782;Unigene0002319;Unigene0002469;Unigene0002986;Unigene0003814;Unigene0007115;Unigene0007588;Unigene0007689;Unigene0009348;Unigene0013131;Unigene0013802;Unigene0015665;Unigene0016570;Unigene0016844;Unigene0018012;Unigene0019015;Unigene0019474;Unigene0020281;Unigene0020412;Unigene0022116;Unigene0022845;Unigene0023094;Unigene0026099;Unigene0026751;Unigene0026915;Unigene00…	K03006+K02335+K01956+K01081+K00943+K03002+K03015+K03005+K10808+K03024+K02327+K03025+K02326+K13800+K03504+K01510+K03026+K01510+K01464+K03021+K03019+K14641+K01955+K03016+K03506+K03013+K13421+K03505+K01431+K03787+K01513+K00254+K03010+K03020+K10807+K03017+K01465+K02999+K03012+K02328+K00962+K16329+K13998+K03023+K03505+K00876+K00962+K00609
mRNA surveillance pathway	48	143	0.0303398	0.168463	ko03015	Unigene0000014;Unigene0000059;Unigene0000940;Unigene0001224;Unigene0001359;Unigene0002664;Unigene0002770;Unigene0005405;Unigene0005614;Unigene0005615;Unigene0005891;Unigene0007382;Unigene0007869;Unigene0008771;Unigene0010494;Unigene0011226;Unigene0011644;Unigene0012723;Unigene0014328;Unigene0015415;Unigene0016163;Unigene0016425;Unigene0019709;Unigene0021329;Unigene0024608;Unigene0025601;Unigene00…	K14327+K14376+K14411+K03456+K03267+K11584+K13025+K11583+K12812+K12812+K13126+K14407+K14324+K14402+K14411+K14397+K03456+K14409+K13126+K14404+K14962+K14396+K14396+K14411+K14962+K13114+K14400+K14416+K14406+K12882+K04382+K13917+K06100+K06965+K12875+K14403+K14326+K14401+K11584+K12876+K00565+K06100+K13126+K00565+K14404+K12877+K13917+K14399
Carbon metabolism	99	320	0.0313419	0.168463	ko01200	Unigene0000011;Unigene0000391;Unigene0001040;Unigene0001150;Unigene0002025;Unigene0002123;Unigene0002146;Unigene0002941;Unigene0003606;Unigene0004887;Unigene0005326;Unigene0006436;Unigene0006961;Unigene0007015;Unigene0007110;Unigene0007147;Unigene0007148;Unigene0007383;Unigene0007606;Unigene0008214;Unigene0008681;Unigene0009389;Unigene0009640;Unigene0010389;Unigene0011716;Unigene0011761;Unigene00…	K01601+K00281+K01689+K14454+K00850+K14272+K01895+K00297+K00873+K01057+K01834+K00658+K01623+K00814+K02437+K00873+K00873+K00600+K00026+K05605+K01754+K18121+K03841+K00029+K01647+K01962+K05605+K00162+K01803+K00030+K01807+K00627+K01057+K00640+K00051+K00036+K01810+K00927+K00031+K00234+K00615+K00627+K01962+K00026+K00028+K03841+K18121+K00616+K01938+K00948+K01783+K00140+K01647+K00830+K00850+K00844+K00616+…
Basal transcription factors	20	52	0.0359148	0.18532	ko03022	Unigene0001400;Unigene0007470;Unigene0010887;Unigene0011898;Unigene0014901;Unigene0015611;Unigene0019621;Unigene0022986;Unigene0025546;Unigene0029874;Unigene0032421;Unigene0033082;Unigene0033919;Unigene0034239;Unigene0036453;Unigene0037119;Unigene0037970;Unigene0038960;Unigene0039006;Unigene0039966	K03130+K03124+K10843+K03123+K03125+K03136+K03137+K14649+K03138+K03132+K03133+K03124+K03141+K03143+K03128+K03135+K06634+K10844+K02202+K03129
Histidine metabolism	10	22	0.0405417	0.195163	ko00340	Unigene0011733;Unigene0014989;Unigene0021776;Unigene0021928;Unigene0023583;Unigene0024517;Unigene0030845;Unigene0033363;Unigene0034321;Unigene0036380	K01663+K00765+K18649+K01590+K01814+K01693+K00817+K11755+K00128+K00128
Pentose phosphate pathway	25	69	0.0430546	0.195163	ko00030	Unigene0002025;Unigene0004887;Unigene0006961;Unigene0009640;Unigene0013165;Unigene0016108;Unigene0016528;Unigene0016880;Unigene0016995;Unigene0017948;Unigene0019332;Unigene0020448;Unigene0021681;Unigene0022432;Unigene0022603;Unigene0024669;Unigene0026119;Unigene0026777;Unigene0027384;Unigene0029422;Unigene0030301;Unigene0031418;Unigene0032216;Unigene0035559;Unigene0039670	K00850+K01057+K01623+K03841+K01807+K01057+K01835+K00036+K01810+K00615+K03841+K00852+K00616+K00948+K01783+K00850+K00616+K03841+K00033+K00033+K00895+K00850+K00131+K00036+K01835
Proteasome	25	69	0.0430546	0.195163	ko03050	Unigene0000334;Unigene0004041;Unigene0004612;Unigene0004761;Unigene0005051;Unigene0006249;Unigene0006378;Unigene0007188;Unigene0007871;Unigene0008887;Unigene0010004;Unigene0010146;Unigene0012343;Unigene0012981;Unigene0014037;Unigene0014413;Unigene0015468;Unigene0015957;Unigene0019986;Unigene0022669;Unigene0024322;Unigene0025472;Unigene0028540;Unigene0028588;Unigene0031952	K06699+K06691+K02726+K02735+K02730+K03065+K03033+K03030+K10881+K03066+K02729+K03063+K03036+K03029+K06700+K02727+K03031+K03037+K03028+K03064+K03062+K02731+K02739+K03039+K03033
Protein export	20	53	0.043874	0.195163	ko03060	Unigene0006093;Unigene0009513;Unigene0009635;Unigene0013569;Unigene0014762;Unigene0015044;Unigene0017467;Unigene0022360;Unigene0026339;Unigene0027528;Unigene0028566;Unigene0028918;Unigene0029812;Unigene0030966;Unigene0031484;Unigene0032247;Unigene0032566;Unigene0033894;Unigene0034437;Unigene0036183	K03106+K09647+K09648+K09481+K13431+K12272+K03217+K09647+K03217+K03107+K09540+K03070+K03106+K03110+K03070+K03070+K12275+K03217+K10956+K03105
Glycosylphosphatidylinositol(GPI)-anchor biosynthesis	13	32	0.0540269	0.223229	ko00563	Unigene0004048;Unigene0004207;Unigene0004694;Unigene0006362;Unigene0008644;Unigene0009370;Unigene0010702;Unigene0013369;Unigene0015862;Unigene0019914;Unigene0035104;Unigene0039237;Unigene0039841	K03859+K05310+K03857+K05286+K07541+K05292+K05284+K05291+K11001+K05290+K03434+K09658+K03861
Folate biosynthesis	12	29	0.0548903	0.223229	ko00790	Unigene0003997;Unigene0005583;Unigene0006600;Unigene0008988;Unigene0009756;Unigene0016897;Unigene0019255;Unigene0019456;Unigene0027978;Unigene0032785;Unigene0035705;Unigene0036180	K15376+K03637+K13941+K01724+K00079+K01930+K01930+K18482+K15631+K18482+K20457+K13998
One carbon pool by folate	11	26	0.0553747	0.223229	ko00670	Unigene0002941;Unigene0003429;Unigene0007383;Unigene0009421;Unigene0021829;Unigene0024651;Unigene0024660;Unigene0029124;Unigene0036180;Unigene0037094;Unigene0038251	K00297+K01934+K00600+K00602+K01938+K00604+K00288+K01934+K13998+K00605+K01433
Amino sugar and nucleotide sugar metabolism	42	128	0.0574878	0.224725	ko00520	Unigene0000174;Unigene0000416;Unigene0001218;Unigene0001552;Unigene0002257;Unigene0002607;Unigene0003209;Unigene0004178;Unigene0006613;Unigene0006702;Unigene0007784;Unigene0013137;Unigene0013536;Unigene0014240;Unigene0015689;Unigene0016528;Unigene0016593;Unigene0016995;Unigene0018453;Unigene0018489;Unigene0019296;Unigene0020349;Unigene0021365;Unigene0021901;Unigene0021979;Unigene0024089;Unigene00…	K01209+K12446+K18677+K00012+K15920+K00963+K00975+K12447+K12373+K16190+K00966+K13648+K00963+K00965+K12448+K01835+K05305+K01810+K00820+K01836+K13648+K00847+K01183+K13648+K00975+K08678+K08679+K00844+K06118+K00326+K01183+K13648+K01711+K00972+K01784+K01183+K00847+K00326+K08679+K13648+K13648+K01835
Metabolic pathways	628	2294	0.0663872	0.248721	ko01100	Unigene0000001;Unigene0000011;Unigene0000020;Unigene0000061;Unigene0000304;Unigene0000391;Unigene0000416;Unigene0000536;Unigene0000563;Unigene0000828;Unigene0000865;Unigene0000923;Unigene0000955;Unigene0001007;Unigene0001031;Unigene0001040;Unigene0001045;Unigene0001089;Unigene0001150;Unigene0001244;Unigene0001273;Unigene0001331;Unigene0001484;Unigene0001552;Unigene0001782;Unigene0001817;Unigene00…	K01190+K01601+K00422+K00654+K00888+K00281+K12446+K01904+K00921+K10206+K11262+K01228+K03006+K01568+K01662+K01689+K00264+K11752+K14454+K01626+K01490+K05349+K01054+K00012+K02335+K14760+K00275+K00679+K00850+K14272+K01895+K15920+K01956+K00514+K13811+K00705+K00826+K00547+K01081+K00963+K10532+K01599+K03843+K19562+K00297+K01205+K00943+K00487+K08901+K00975+K05582+K01934+K04035+K13513+K09587+K00873+K03002+…
Glycosaminoglycan degradation	6	12	0.0674823	0.248721	ko00531	Unigene0002640;Unigene0002968;Unigene0006613;Unigene0015203;Unigene0030720;Unigene0030923	K10532+K01205+K12373+K07964+K12309+K10532
C5-Branched dibasic acid metabolism	4	7	0.0828382	0.293309	ko00660	Unigene0005578;Unigene0008971;Unigene0027148;Unigene0031875	K01704+K00052+K01703+K01653
Alanine, aspartate and glutamate metabolism	21	60	0.0841273	0.293309	ko00250	Unigene0001045;Unigene0001150;Unigene0002123;Unigene0002319;Unigene0006261;Unigene0007015;Unigene0007701;Unigene0018453;Unigene0019227;Unigene0023094;Unigene0023556;Unigene0026359;Unigene0027510;Unigene0029684;Unigene0030353;Unigene0030839;Unigene0031325;Unigene0032674;Unigene0036229;Unigene0038559;Unigene0038741	K00264+K14454+K14272+K01956+K01580+K00814+K01940+K00820+K00811+K01955+K00830+K14455+K01939+K01756+K00764+K13566+K00294+K00262+K01915+K00827+K00609
Isoquinoline alkaloid biosynthesis	10	25	0.0943891	0.320426	ko00950	Unigene0000020;Unigene0001150;Unigene0019227;Unigene0020392;Unigene0020393;Unigene0026359;Unigene0026754;Unigene0027309;Unigene0030605;Unigene0033515	K00422+K14454+K00811+K00422+K00422+K14455+K00422+K00422+K00276+K00815
Selenocompound metabolism	9	22	0.0969021	0.320522	ko00450	Unigene0000077;Unigene0002366;Unigene0002957;Unigene0004815;Unigene0018530;Unigene0022560;Unigene0034349;Unigene0037808;Unigene0039499	K08247+K13811+K01874+K01760+K00384+K01761+K01874+K01739+K11717
Biosynthesis of secondary metabolites	336	1211	0.102915	0.3319	ko01110	Unigene0000020;Unigene0000391;Unigene0000486;Unigene0000536;Unigene0000828;Unigene0000865;Unigene0001007;Unigene0001031;Unigene0001040;Unigene0001045;Unigene0001089;Unigene0001150;Unigene0001244;Unigene0001273;Unigene0001331;Unigene0001817;Unigene0001928;Unigene0002025;Unigene0002123;Unigene0002146;Unigene0002365;Unigene0002402;Unigene0002404;Unigene0002427;Unigene0002469;Unigene0002692;Unigene00…	K00422+K00281+K21371+K01904+K10206+K11262+K01568+K01662+K01689+K00264+K11752+K14454+K01626+K01490+K05349+K14760+K21371+K00850+K14272+K01895+K00514+K00705+K00826+K00547+K01081+K01599+K00487+K00975+K04035+K13513+K09587+K00873+K10528+K01823+K03809+K00705+K01114+K05349+K09828+K00099+K03526+K18368+K01760+K01057+K09840+K00002+K00891+K06126+K01834+K01704+K00688+K01114+K01733+K00083+K01188+K01772+K15227+…
Porphyrin and chlorophyll metabolism	19	56	0.125393	0.394529	ko00860	Unigene0002692;Unigene0003481;Unigene0006182;Unigene0007113;Unigene0007136;Unigene0009596;Unigene0009610;Unigene0016187;Unigene0017220;Unigene0019668;Unigene0020133;Unigene0021497;Unigene0029509;Unigene0031597;Unigene0031908;Unigene0032711;Unigene0032876;Unigene0033735;Unigene0036824	K01599+K04035+K01772+K02492+K02259+K13545+K10960+K08101+K03404+K01749+K13071+K04040+K00231+K00231+K18010+K01772+K08099+K01599+K13606
Cysteine and methionine metabolism	35	112	0.136547	0.409612	ko00270	Unigene0001150;Unigene0002404;Unigene0002427;Unigene0003890;Unigene0004815;Unigene0006912;Unigene0006934;Unigene0007606;Unigene0011183;Unigene0016165;Unigene0016568;Unigene0018225;Unigene0018981;Unigene0019227;Unigene0019634;Unigene0022560;Unigene0026359;Unigene0026859;Unigene0027022;Unigene0028233;Unigene0028734;Unigene0028821;Unigene0028976;Unigene0031683;Unigene0031786;Unigene0032625;Unigene00…	K14454+K00826+K00547+K01011+K01760+K00797+K00016+K00026+K00789+K00558+K00640+K00826+K00026+K00811+K16054+K01761+K14455+K01244+K00547+K00797+K01251+K21456+K00899+K00547+K00640+K12524+K01919+K00815+K01738+K00640+K00026+K13034+K01739+K00827+K00928
Thiamine metabolism	11	30	0.139031	0.409612	ko00730	Unigene0001031;Unigene0005154;Unigene0026441;Unigene0027196;Unigene0027948;Unigene0030475;Unigene0030700;Unigene0032282;Unigene0034389;Unigene0038076;Unigene0039592	K01662+K00949+K00939+K00878+K00939+K01662+K06949+K06928+K00939+K00939+K14153
beta-Alanine metabolism	17	50	0.139713	0.409612	ko00410	Unigene0006261;Unigene0006912;Unigene0008214;Unigene0008836;Unigene0009611;Unigene0011999;Unigene0020281;Unigene0022623;Unigene0027436;Unigene0028233;Unigene0028717;Unigene0030137;Unigene0030605;Unigene0032811;Unigene0034321;Unigene0036380;Unigene0036917	K01580+K00797+K05605+K01918+K13366+K05605+K01464+K00140+K01578+K00797+K01431+K00249+K00276+K17839+K00128+K00128+K00140
Caffeine metabolism	2	3	0.170828	0.479061	ko00232	Unigene0023517;Unigene0037972	K00365+K00106
Glycosphingolipid biosynthesis - ganglio series	2	3	0.170828	0.479061	ko00604	Unigene0006613;Unigene0030720	K12373+K12309
Valine, leucine and isoleucine degradation	17	52	0.183413	0.50341	ko00280	Unigene0002404;Unigene0008214;Unigene0011999;Unigene0018225;Unigene0022623;Unigene0028770;Unigene0029536;Unigene0030137;Unigene0030481;Unigene0030748;Unigene0031117;Unigene0034321;Unigene0036380;Unigene0036917;Unigene0037735;Unigene0037809;Unigene0038559	K00826+K05605+K05605+K00826+K00140+K01641+K00382+K00249+K05607+K01969+K01968+K00128+K00128+K00140+K09699+K00167+K00827
Phosphonate and phosphinate metabolism	3	6	0.190069	0.510811	ko00440	Unigene0017067;Unigene0030346;Unigene0036065	K00967+K00993+K00968
Galactose metabolism	23	74	0.20647	0.543564	ko00052	Unigene0000001;Unigene0002025;Unigene0002607;Unigene0004178;Unigene0008356;Unigene0009456;Unigene0010786;Unigene0011776;Unigene0012628;Unigene0013031;Unigene0013536;Unigene0014240;Unigene0016528;Unigene0024669;Unigene0024725;Unigene0024779;Unigene0024841;Unigene0028786;Unigene0030720;Unigene0031418;Unigene0031852;Unigene0037500;Unigene0039670	K01190+K00850+K00963+K12447+K06617+K01187+K18819+K01193+K18819+K06617+K00963+K00965+K01835+K00850+K01785+K00844+K07407+K06617+K12309+K00850+K01784+K06617+K01835
Carbon fixation in photosynthetic organisms	24	78	0.216084	0.557497	ko00710	Unigene0000011;Unigene0001150;Unigene0002123;Unigene0006961;Unigene0007015;Unigene0007606;Unigene0009640;Unigene0010389;Unigene0012576;Unigene0013165;Unigene0016816;Unigene0017192;Unigene0017948;Unigene0018981;Unigene0019211;Unigene0019332;Unigene0022603;Unigene0026137;Unigene0026359;Unigene0026777;Unigene0031255;Unigene0034197;Unigene0035098;Unigene0039340	K01601+K14454+K14272+K01623+K00814+K00026+K03841+K00029+K01803+K01807+K00051+K00927+K00615+K00026+K00028+K03841+K01783+K01006+K14455+K03841+K00134+K01595+K00026+K00028
Lysine biosynthesis	6	16	0.224567	0.568023	ko00300	Unigene0000828;Unigene0019931;Unigene0024828;Unigene0032625;Unigene0033583;Unigene0039487	K10206+K00215+K01714+K12524+K01586+K00928
Pantothenate and CoA biosynthesis	11	33	0.229811	0.570108	ko00770	Unigene0002404;Unigene0005952;Unigene0008836;Unigene0009236;Unigene0011940;Unigene0018225;Unigene0020281;Unigene0028717;Unigene0028998;Unigene0031875;Unigene0039110	K00826+K06133+K01918+K09680+K00053+K00826+K01464+K01431+K01513+K01653+K01687
Sulfur relay system	5	13	0.239071	0.571284	ko04122	Unigene0000072;Unigene0003890;Unigene0005583;Unigene0026997;Unigene0033407	K11996+K01011+K03637+K12161+K14168
Glycerolipid metabolism	29	97	0.239142	0.571284	ko00561	Unigene0001484;Unigene0001935;Unigene0003492;Unigene0004482;Unigene0004782;Unigene0004957;Unigene0005300;Unigene0005894;Unigene0007413;Unigene0010966;Unigene0011710;Unigene0013989;Unigene0016232;Unigene0022972;Unigene0024713;Unigene0024841;Unigene0025994;Unigene0026014;Unigene0026051;Unigene0028583;Unigene0028696;Unigene0028968;Unigene0031148;Unigene0031569;Unigene0034000;Unigene0034321;Unigene00…	K01054+K00679+K13513+K01054+K06119+K00002+K09480+K22848+K00655+K13508+K09480+K14674+K00901+K13519+K01054+K07407+K06118+K00630+K03715+K15918+K00863+K01054+K13523+K00864+K21362+K00128+K15728+K00128+K18693
Fructose and mannose metabolism	22	73	0.263588	0.618233	ko00051	Unigene0002025;Unigene0006961;Unigene0007283;Unigene0007784;Unigene0009640;Unigene0012576;Unigene0016208;Unigene0016593;Unigene0019332;Unigene0020349;Unigene0024669;Unigene0024779;Unigene0026777;Unigene0028696;Unigene0029751;Unigene0030301;Unigene0030811;Unigene0030977;Unigene0031418;Unigene0033269;Unigene0034249;Unigene0038415	K00850+K01623+K00008+K00966+K03841+K01803+K18447+K05305+K03841+K00847+K00850+K00844+K03841+K00863+K19355+K00895+K01103+K01711+K00850+K00847+K01805+K19355
Nicotinate and nicotinamide metabolism	9	28	0.302816	0.689601	ko00760	Unigene0002469;Unigene0009121;Unigene0014416;Unigene0027549;Unigene0028984;Unigene0028998;Unigene0031215;Unigene0035169;Unigene0035613	K01081+K18551+K00767+K00858+K03787+K01513+K01950+K18551+K00763
Tyrosine metabolism	16	53	0.304708	0.689601	ko00350	Unigene0000020;Unigene0001150;Unigene0019227;Unigene0020392;Unigene0020393;Unigene0026359;Unigene0026754;Unigene0027309;Unigene0028266;Unigene0030190;Unigene0030605;Unigene0030845;Unigene0031798;Unigene0033515;Unigene0034995;Unigene0040005	K00422+K14454+K00811+K00422+K00422+K14455+K00422+K00422+K00451+K01555+K00276+K00817+K00001+K00815+K00121+K00121
RNA polymerase	17	57	0.316295	0.703483	ko03020	Unigene0000955;Unigene0003814;Unigene0007115;Unigene0007588;Unigene0009348;Unigene0013802;Unigene0019015;Unigene0020412;Unigene0022116;Unigene0026099;Unigene0026915;Unigene0029635;Unigene0029673;Unigene0031608;Unigene0032599;Unigene0033863;Unigene0036584	K03006+K03002+K03015+K03005+K03024+K03025+K03026+K03021+K03019+K03016+K03013+K03010+K03020+K03017+K02999+K03012+K03023
Arginine biosynthesis	16	54	0.334883	0.732202	ko00220	Unigene0001150;Unigene0002123;Unigene0007015;Unigene0007701;Unigene0014872;Unigene0019227;Unigene0026359;Unigene0026812;Unigene0029227;Unigene0032674;Unigene0034256;Unigene0035178;Unigene0035649;Unigene0036229;Unigene0037239;Unigene0037924	K14454+K14272+K00814+K01940+K00145+K00811+K14455+K00930+K00611+K00262+K13427+K00818+K01427+K01915+K14677+K14682
Monobactam biosynthesis	5	15	0.356286	0.766014	ko00261	Unigene0002366;Unigene0019931;Unigene0024828;Unigene0032625;Unigene0039487	K13811+K00215+K01714+K12524+K00928
Autophagy - other eukaryotes	17	59	0.375729	0.793022	ko04136	Unigene0000377;Unigene0000567;Unigene0000962;Unigene0004796;Unigene0012368;Unigene0018042;Unigene0024067;Unigene0025236;Unigene0028776;Unigene0029232;Unigene0029781;Unigene0031789;Unigene0032354;Unigene0033801;Unigene0033920;Unigene0034488;Unigene0036839	K17906+K07203+K07204+K17888+K17907+K08337+K17890+K08341+K04382+K00914+K08334+K08269+K17606+K08330+K08266+K08333+K08331
Butanoate metabolism	6	19	0.381142	0.793022	ko00650	Unigene0006261;Unigene0009389;Unigene0021504;Unigene0022873;Unigene0028770;Unigene0031875	K01580+K18121+K18121+K00074+K01641+K01653
Other glycan degradation	7	23	0.400627	0.796622	ko00511	Unigene0000001;Unigene0002551;Unigene0004531;Unigene0006613;Unigene0030720;Unigene0038676;Unigene0038713	K01190+K01206+K17108+K12373+K12309+K01227+K01444
Tropane, piperidine and pyridine alkaloid biosynthesis	7	23	0.400627	0.796622	ko00960	Unigene0001150;Unigene0009938;Unigene0019227;Unigene0026359;Unigene0030605;Unigene0030845;Unigene0033515	K14454+K08081+K00811+K14455+K00276+K00817+K00815
Carotenoid biosynthesis	10	34	0.401398	0.796622	ko00906	Unigene0002365;Unigene0004899;Unigene0010610;Unigene0016265;Unigene0018231;Unigene0022440;Unigene0028971;Unigene0029946;Unigene0031079;Unigene0031187	K00514+K09840+K09841+K09837+K09843+K06443+K06444+K15744+K02293+K09835
Arachidonic acid metabolism	6	20	0.434863	0.849959	ko00590	Unigene0005385;Unigene0009756;Unigene0013989;Unigene0018145;Unigene0028666;Unigene0037504	K00432+K00079+K14674+K01254+K05309+K15730
Fatty acid degradation	16	59	0.491242	0.944252	ko00071	Unigene0007685;Unigene0009326;Unigene0011456;Unigene0026867;Unigene0027068;Unigene0029637;Unigene0030137;Unigene0031798;Unigene0032805;Unigene0033811;Unigene0033943;Unigene0034321;Unigene0034995;Unigene0036380;Unigene0037346;Unigene0040005	K10527+K00232+K00232+K01897+K07517+K01897+K00249+K00001+K07517+K00232+K01897+K00128+K00121+K00128+K00232+K00121
Sulfur metabolism	12	44	0.497745	0.944252	ko00920	Unigene0002366;Unigene0003890;Unigene0007955;Unigene0016568;Unigene0020415;Unigene0024632;Unigene0031786;Unigene0034478;Unigene0034717;Unigene0034854;Unigene0036701;Unigene0037808	K13811+K01011+K15422+K00640+K00392+K05907+K00640+K01738+K00387+K00640+K13034+K01739
Homologous recombination	26	98	0.516262	0.951659	ko03440	Unigene0001512;Unigene0001782;Unigene0003354;Unigene0003953;Unigene0007871;Unigene0008792;Unigene0009165;Unigene0010039;Unigene0011466;Unigene0011637;Unigene0012019;Unigene0013131;Unigene0016844;Unigene0021473;Unigene0026789;Unigene0027231;Unigene0028261;Unigene0029512;Unigene0033103;Unigene0034149;Unigene0034416;Unigene0034914;Unigene0036150;Unigene0036593;Unigene0037474;Unigene0037622	K10740+K02335+K10882+K07466+K10881+K10875+K10880+K10901+K10866+K10739+K03165+K02327+K03504+K11864+K10875+K07466+K03505+K10869+K03165+K10728+K02328+K10865+K20776+K03505+K07466+K10867
Sphingolipid metabolism	11	41	0.527695	0.951659	ko00600	Unigene0000001;Unigene0000061;Unigene0004531;Unigene0006951;Unigene0017775;Unigene0019730;Unigene0024841;Unigene0029843;Unigene0030720;Unigene0030941;Unigene0035796	K01190+K00654+K17108+K04708+K04715+K04710+K07407+K04712+K12309+K04718+K01634
DNA replication	23	87	0.527912	0.951659	ko03030	Unigene0001512;Unigene0001782;Unigene0003953;Unigene0011637;Unigene0013131;Unigene0014658;Unigene0015665;Unigene0016774;Unigene0016844;Unigene0023813;Unigene0026751;Unigene0027231;Unigene0028261;Unigene0030062;Unigene0030626;Unigene0031370;Unigene0034334;Unigene0034416;Unigene0035056;Unigene0036593;Unigene0036645;Unigene0037474;Unigene0039530	K10740+K02335+K07466+K10739+K02327+K10747+K02326+K10755+K03504+K04802+K03506+K07466+K03505+K10754+K10755+K10747+K10756+K02328+K04799+K03505+K10755+K07466+K10743
Arginine and proline metabolism	18	68	0.532223	0.951659	ko00330	Unigene0001150;Unigene0002049;Unigene0006912;Unigene0009611;Unigene0015633;Unigene0015710;Unigene0019227;Unigene0020112;Unigene0026359;Unigene0028233;Unigene0031325;Unigene0032811;Unigene0034256;Unigene0034321;Unigene0035207;Unigene0036380;Unigene0037631;Unigene0039533	K14454+K01259+K00797+K13366+K00472+K10536+K00811+K00286+K14455+K00797+K00294+K17839+K13427+K00128+K00472+K00128+K00286+K00472
Citrate cycle (TCA cycle)	20	76	0.541226	0.951659	ko00020	Unigene0006436;Unigene0007606;Unigene0011716;Unigene0012248;Unigene0012993;Unigene0016094;Unigene0017436;Unigene0017613;Unigene0018408;Unigene0018981;Unigene0023399;Unigene0028926;Unigene0029305;Unigene0029536;Unigene0033002;Unigene0034132;Unigene0034404;Unigene0034614;Unigene0035098;Unigene0037046	K00658+K00026+K01647+K00162+K00030+K00627+K00031+K00234+K00627+K00026+K01647+K01679+K00031+K00382+K01900+K01899+K01648+K00162+K00026+K00161
Inositol phosphate metabolism	22	84	0.549435	0.951659	ko00562	Unigene0000304;Unigene0000563;Unigene0004027;Unigene0004623;Unigene0005263;Unigene0005993;Unigene0007955;Unigene0012576;Unigene0012697;Unigene0013882;Unigene0019411;Unigene0021776;Unigene0022623;Unigene0029232;Unigene0031944;Unigene0032336;Unigene0032584;Unigene0033403;Unigene0033617;Unigene0034773;Unigene0035575;Unigene0036917	K00888+K00921+K01114+K20279+K01858+K01114+K15422+K01803+K00913+K05857+K00913+K18649+K00140+K00914+K01092+K00889+K19801+K10572+K01765+K03103+K00915+K00140
Glycine, serine and threonine metabolism	23	88	0.55329	0.951659	ko00260	Unigene0000391;Unigene0002123;Unigene0005326;Unigene0006054;Unigene0007110;Unigene0007383;Unigene0008681;Unigene0010575;Unigene0017452;Unigene0023556;Unigene0028583;Unigene0029536;Unigene0030605;Unigene0032298;Unigene0032625;Unigene0033392;Unigene0033549;Unigene0034679;Unigene0037094;Unigene0037214;Unigene0038559;Unigene0039481;Unigene0039487	K00281+K14272+K01834+K01733+K02437+K00600+K01754+K01620+K00130+K00830+K15918+K00382+K00276+K00831+K12524+K15919+K01834+K01696+K00605+K01733+K00827+K01695+K00928
Ubiquinone and other terpenoid-quinone biosynthesis	13	50	0.572024	0.968601	ko00130	Unigene0000536;Unigene0001817;Unigene0003014;Unigene0003955;Unigene0005321;Unigene0015967;Unigene0024606;Unigene0028940;Unigene0033515;Unigene0039156;Unigene0039280;Unigene0039484;Unigene0039784	K01904+K14760+K00487+K03809+K06126+K03809+K01904+K06127+K00815+K12502+K01904+K00591+K05928
Photosynthesis - antenna proteins	4	15	0.584129	0.968601	ko00196	Unigene0029073;Unigene0029401;Unigene0030856;Unigene0034794	K08908+K14172+K08912+K08908
Flavone and flavonol biosynthesis	1	3	0.59941	0.968601	ko00944	Unigene0009525	K05280
Fatty acid biosynthesis	12	47	0.601936	0.968601	ko00061	Unigene0000865;Unigene0011761;Unigene0018744;Unigene0020753;Unigene0021466;Unigene0023684;Unigene0026867;Unigene0029637;Unigene0030177;Unigene0030262;Unigene0033943;Unigene0037736	K11262+K01962+K01962+K10781+K00208+K00645+K01897+K01897+K00648+K09458+K01897+K01961
Protein processing in endoplasmic reticulum	72	281	0.624197	0.968601	ko04141	Unigene0000007;Unigene0000923;Unigene0001017;Unigene0002727;Unigene0003408;Unigene0003563;Unigene0003905;Unigene0004564;Unigene0004688;Unigene0005039;Unigene0005732;Unigene0005810;Unigene0007836;Unigene0008846;Unigene0008965;Unigene0009004;Unigene0009693;Unigene0009721;Unigene0010463;Unigene0010672;Unigene0010875;Unigene0012466;Unigene0013569;Unigene0015449;Unigene0015980;Unigene0016611;Unigene00…	K11718+K01228+K10636+K13993+K13993+K10085+K09580+K13719+K13989+K03283+K08057+K13993+K03283+K01456+K01230+K09487+K03283+K14004+K07151+K12667+K09562+K13989+K09481+K09503+K10666+K10575+K08288+K14016+K08057+K13993+K14007+K06689+K09523+K04523+K12670+K10597+K09487+K03094+K14006+K13249+K13993+K10661+K09540+K09584+K13989+K05546+K14026+K14005+K08852+K09486+K09580+K12666+K10666+K12275+K10839+K14011+K07765+…
Ascorbate and aldarate metabolism	11	44	0.633423	0.968601	ko00053	Unigene0001552;Unigene0004178;Unigene0005530;Unigene0006702;Unigene0021776;Unigene0031043;Unigene0032382;Unigene0033163;Unigene0034321;Unigene0036380;Unigene0039979	K00012+K12447+K08232+K16190+K18649+K00434+K14190+K08232+K00128+K00128+K00225
Riboflavin metabolism	6	24	0.633479	0.968601	ko00740	Unigene0001089;Unigene0010794;Unigene0014798;Unigene0028998;Unigene0032523;Unigene0036529	K11752+K00794+K18453+K01513+K14379+K11752
Biotin metabolism	5	20	0.635805	0.968601	ko00780	Unigene0002916;Unigene0021466;Unigene0025246;Unigene0030262;Unigene0035808	K19562+K00208+K01012+K09458+K00652
Brassinosteroid biosynthesis	5	20	0.635805	0.968601	ko00905	Unigene0003508;Unigene0011708;Unigene0016011;Unigene0016316;Unigene0038610	K09587+K09591+K09590+K20623+K12637
Peroxisome	29	115	0.638226	0.968601	ko04146	Unigene0003369;Unigene0007777;Unigene0009326;Unigene0011456;Unigene0012608;Unigene0013772;Unigene0017436;Unigene0018305;Unigene0018905;Unigene0020370;Unigene0021796;Unigene0022633;Unigene0023556;Unigene0023959;Unigene0026779;Unigene0026867;Unigene0027436;Unigene0029305;Unigene0029637;Unigene0030120;Unigene0031212;Unigene0031315;Unigene0033675;Unigene0033734;Unigene0033811;Unigene0033943;Unigene00…	K13348+K13348+K00232+K00232+K13348+K13337+K00031+K13338+K04564+K13346+K13347+K13341+K00830+K00477+K12261+K01897+K01578+K00031+K01897+K13344+K13339+K13336+K17879+K06664+K00232+K01897+K00232+K00106+K12663
Fatty acid metabolism	20	81	0.669241	0.992783	ko01212	Unigene0000865;Unigene0007685;Unigene0009326;Unigene0011456;Unigene0011761;Unigene0011780;Unigene0018744;Unigene0020753;Unigene0021466;Unigene0021512;Unigene0023684;Unigene0026867;Unigene0029637;Unigene0030137;Unigene0030177;Unigene0030262;Unigene0033811;Unigene0033943;Unigene0037346;Unigene0037736	K11262+K10527+K00232+K00232+K01962+K07512+K01962+K10781+K00208+K10251+K00645+K01897+K01897+K00249+K00648+K09458+K00232+K01897+K00232+K01961
Steroid biosynthesis	8	33	0.669551	0.992783	ko00100	Unigene0004252;Unigene0011850;Unigene0013989;Unigene0017994;Unigene0030098;Unigene0030348;Unigene0031161;Unigene0036050	K09828+K00801+K14674+K01824+K08246+K07748+K00222+K00227
Other types of O-glycan biosynthesis	4	17	0.69092	0.998058	ko00514	Unigene0001692;Unigene0001731;Unigene0021140;Unigene0032953	K20782+K20784+K09667+K09667
Glyoxylate and dicarboxylate metabolism	24	98	0.694318	0.998058	ko00630	Unigene0000011;Unigene0000391;Unigene0002123;Unigene0002146;Unigene0007110;Unigene0007383;Unigene0007606;Unigene0009389;Unigene0011716;Unigene0018981;Unigene0021504;Unigene0023399;Unigene0023556;Unigene0028583;Unigene0029536;Unigene0031297;Unigene0033392;Unigene0034744;Unigene0034813;Unigene0035098;Unigene0036229;Unigene0037094;Unigene0037906;Unigene0038251	K01601+K00281+K14272+K01895+K02437+K00600+K00026+K18121+K01647+K00026+K18121+K01647+K00830+K15918+K00382+K19269+K15919+K01913+K00284+K00026+K01915+K00605+K19269+K01433
Glycerophospholipid metabolism	27	110	0.696319	0.998058	ko00564	Unigene0003492;Unigene0003648;Unigene0004027;Unigene0005697;Unigene0005993;Unigene0007413;Unigene0007815;Unigene0008296;Unigene0010966;Unigene0012460;Unigene0013989;Unigene0016232;Unigene0017067;Unigene0022972;Unigene0026014;Unigene0026074;Unigene0029368;Unigene0029663;Unigene0030346;Unigene0031148;Unigene0033369;Unigene0035578;Unigene0036065;Unigene0036785;Unigene0038017;Unigene0038040;Unigene00…	K13513+K05929+K01114+K00995+K01114+K00655+K00550+K00981+K13508+K06130+K14674+K00901+K00967+K13519+K00630+K01517+K01613+K08730+K00993+K13523+K01115+K15728+K00968+K18693+K00981+K22389+K01613
Phenylalanine metabolism	12	51	0.722783	1	ko00360	Unigene0000536;Unigene0001150;Unigene0003014;Unigene0019227;Unigene0022873;Unigene0024606;Unigene0026359;Unigene0030605;Unigene0030845;Unigene0033515;Unigene0038346;Unigene0039280	K01904+K14454+K00487+K00811+K00074+K01904+K14455+K00276+K00817+K00815+K00588+K01904
Nitrogen metabolism	9	39	0.732395	1	ko00910	Unigene0001045;Unigene0025127;Unigene0029147;Unigene0032294;Unigene0032674;Unigene0034813;Unigene0036229;Unigene0038514;Unigene0038954	K00264+K00366+K01673+K01673+K00262+K00284+K01915+K02575+K01673
Synthesis and degradation of ketone bodies	1	5	0.782379	1	ko00072	Unigene0028770	K01641
Endocytosis	49	203	0.782866	1	ko04144	Unigene0002595;Unigene0003469;Unigene0003603;Unigene0003677;Unigene0004074;Unigene0004334;Unigene0005039;Unigene0007836;Unigene0008364;Unigene0008918;Unigene0009693;Unigene0009960;Unigene0013177;Unigene0013555;Unigene0015606;Unigene0015670;Unigene0016566;Unigene0018138;Unigene0018772;Unigene0019844;Unigene0020030;Unigene0020418;Unigene0020679;Unigene0022704;Unigene0022711;Unigene0023326;Unigene00…	K07904+K12200+K15053+K12486+K05758+K12486+K03283+K03283+K12193+K05756+K03283+K19366+K12190+K12197+K19476+K11824+K12191+K10396+K12486+K12196+K19476+K07904+K01528+K12185+K18466+K12479+K12189+K19366+K12195+K12489+K11826+K12489+K12471+K07904+K07904+K10364+K19476+K07904+K00889+K05755+K01115+K10365+K07937+K12471+K11866+K11827+K05757+K12198+K03283
Lysine degradation	15	66	0.785731	1	ko00310	Unigene0000989;Unigene0001016;Unigene0006436;Unigene0006862;Unigene0009365;Unigene0015875;Unigene0020790;Unigene0030341;Unigene0031214;Unigene0032533;Unigene0033436;Unigene0034321;Unigene0035213;Unigene0036380;Unigene0039016	K22748+K11423+K00658+K11420+K19199+K11423+K11430+K11423+K11423+K11430+K14157+K00128+K18826+K00128+K19199
Phosphatidylinositol signaling system	20	87	0.793617	1	ko04070	Unigene0000304;Unigene0000563;Unigene0004623;Unigene0007955;Unigene0008296;Unigene0011128;Unigene0012697;Unigene0013882;Unigene0016232;Unigene0019206;Unigene0019411;Unigene0021776;Unigene0029232;Unigene0031395;Unigene0031944;Unigene0032336;Unigene0032584;Unigene0033403;Unigene0035575;Unigene0038017	K00888+K00921+K20279+K15422+K00981+K02183+K00913+K05857+K00901+K13024+K00913+K18649+K00914+K02183+K01092+K00889+K19801+K10572+K00915+K00981
Diterpenoid biosynthesis	3	15	0.797063	1	ko00904	Unigene0014019;Unigene0035704;Unigene0037558	K04122+K04123+K17961
Glycosphingolipid biosynthesis - globo and isoglobo series	2	11	0.828238	1	ko00603	Unigene0006613;Unigene0024841	K12373+K07407
Ether lipid metabolism	6	30	0.839322	1	ko00565	Unigene0004027;Unigene0005993;Unigene0013989;Unigene0022972;Unigene0030346;Unigene0033369	K01114+K01114+K14674+K13519+K00993+K01115
Lipoic acid metabolism	1	6	0.839616	1	ko00785	Unigene0033588	K03644
Circadian rhythm - plant	11	52	0.84194	1	ko04712	Unigene0000936;Unigene0002099;Unigene0004385;Unigene0005378;Unigene0008200;Unigene0011213;Unigene0023896;Unigene0029412;Unigene0033978;Unigene0038778;Unigene0039778	K12118+K03097+K12119+K12127+K12129+K16240+K12124+K12115+K16221+K10143+K12130
SNARE interactions in vesicular transport	9	45	0.872932	1	ko04130	Unigene0002778;Unigene0005367;Unigene0006984;Unigene0010051;Unigene0024671;Unigene0024994;Unigene0030413;Unigene0031601;Unigene0036465	K08490+K08503+K08515+K08517+K08495+K08490+K08488+K08486+K08515
Indole alkaloid biosynthesis	1	7	0.881807	1	ko00901	Unigene0008007	K21026
Ubiquitin mediated proteolysis	39	174	0.898359	1	ko04120	Unigene0003586;Unigene0006096;Unigene0007802;Unigene0008459;Unigene0011171;Unigene0012486;Unigene0013263;Unigene0014915;Unigene0016611;Unigene0018265;Unigene0019261;Unigene0019386;Unigene0020039;Unigene0021891;Unigene0022185;Unigene0024590;Unigene0024634;Unigene0029641;Unigene0029884;Unigene0029976;Unigene0030367;Unigene0030470;Unigene0030663;Unigene0031052;Unigene0031557;Unigene0032184;Unigene00…	K10144+K10604+K03351+K03353+K10609+K10598+K10588+K03364+K10575+K10573+K06689+K03363+K04506+K10590+K10597+K10589+K03094+K03354+K10685+K10686+K03354+K10581+K04506+K03355+K04506+K10580+K10599+K10610+K03350+K03357+K20217+K10601+K10144+K03094+K03094+K10143+K06688+K10604+K03349
alpha-Linolenic acid metabolism	10	52	0.910042	1	ko00592	Unigene0003736;Unigene0007685;Unigene0009326;Unigene0011456;Unigene0013989;Unigene0018121;Unigene0033811;Unigene0037346;Unigene0038040;Unigene0039311	K10528+K10527+K00232+K00232+K14674+K00454+K00232+K00232+K22389+K10526
Photosynthesis	15	75	0.918869	1	ko00195	Unigene0002701;Unigene0003123;Unigene0005656;Unigene0010878;Unigene0011005;Unigene0014426;Unigene0018325;Unigene0023267;Unigene0026068;Unigene0029939;Unigene0030175;Unigene0033699;Unigene0034138;Unigene0037200;Unigene0039437	K02639+K08901+K02695+K02115+K02639+K02705+K02639+K02109+K02703+K02115+K02694+K08906+K08901+K02111+K02635
Zeatin biosynthesis	2	15	0.934709	1	ko00908	Unigene0012472;Unigene0032304	K10760+K00791
Monoterpenoid biosynthesis	1	9	0.935823	1	ko00902	Unigene0029165	K15095
Biosynthesis of unsaturated fatty acids	5	31	0.938971	1	ko01040	Unigene0009326;Unigene0011456;Unigene0021512;Unigene0033811;Unigene0037346	K00232+K00232+K10251+K00232+K00232
Starch and sucrose metabolism	35	165	0.946655	1	ko00500	Unigene0001331;Unigene0002402;Unigene0002607;Unigene0003209;Unigene0003988;Unigene0004182;Unigene0005914;Unigene0006160;Unigene0009456;Unigene0011776;Unigene0013536;Unigene0016208;Unigene0016374;Unigene0016528;Unigene0016995;Unigene0018210;Unigene0020349;Unigene0021979;Unigene0023289;Unigene0024779;Unigene0028998;Unigene0029674;Unigene0029997;Unigene0033269;Unigene0034673;Unigene0034809;Unigene00…	K05349+K00705+K00963+K00975+K00705+K05349+K00688+K01188+K01187+K01193+K00963+K18447+K00703+K01835+K01810+K01176+K00847+K00975+K01214+K00844+K01513+K01214+K13679+K00847+K05350+K01188+K01188+K00700+K00700+K00700+K00703+K05349+K19893+K01194+K01835
Pentose and glucuronate interconversions	15	80	0.956527	1	ko00040	Unigene0001552;Unigene0002607;Unigene0004178;Unigene0004290;Unigene0004957;Unigene0005895;Unigene0006702;Unigene0007283;Unigene0010826;Unigene0013536;Unigene0016614;Unigene0022603;Unigene0031116;Unigene0034249;Unigene0034408	K00012+K00963+K12447+K01051+K00002+K01213+K16190+K00008+K01051+K00963+K01728+K01783+K01051+K01805+K01051
Phagosome	19	98	0.957073	1	ko04145	Unigene0000563;Unigene0005732;Unigene0005804;Unigene0010051;Unigene0011511;Unigene0013569;Unigene0015563;Unigene0017600;Unigene0018646;Unigene0018924;Unigene0020267;Unigene0021035;Unigene0029232;Unigene0030413;Unigene0032676;Unigene0034437;Unigene0034497;Unigene0036582;Unigene0038142	K00921+K08057+K02144+K08517+K02145+K09481+K02146+K08057+K02148+K07375+K02152+K02147+K00914+K08488+K02151+K10956+K02149+K07374+K08054
Sesquiterpenoid and triterpenoid biosynthesis	2	17	0.960587	1	ko00909	Unigene0010931;Unigene0011850	K15891+K00801
Oxidative phosphorylation	36	175	0.968852	1	ko00190	Unigene0001962;Unigene0003359;Unigene0005804;Unigene0007136;Unigene0010878;Unigene0011511;Unigene0011654;Unigene0011802;Unigene0014973;Unigene0015019;Unigene0015020;Unigene0015563;Unigene0015588;Unigene0016031;Unigene0017513;Unigene0017613;Unigene0018646;Unigene0020267;Unigene0021035;Unigene0022273;Unigene0022451;Unigene0023012;Unigene0023185;Unigene0023267;Unigene0024000;Unigene0029014;Unigene00…	K01507+K05582+K02144+K02259+K02115+K02145+K03949+K03955+K03879+K00411+K00411+K02146+K00416+K02138+K02135+K00234+K02148+K02152+K02147+K02266+K02132+K02256+K03939+K02109+K03940+K03934+K02115+K02258+K02151+K02149+K03941+K03946+K03953+K02111+K03942+K00413
Glutathione metabolism	20	107	0.975307	1	ko00480	Unigene0005385;Unigene0006912;Unigene0007689;Unigene0007906;Unigene0013462;Unigene0016503;Unigene0016880;Unigene0017149;Unigene0017436;Unigene0018697;Unigene0027384;Unigene0028233;Unigene0028821;Unigene0029305;Unigene0029422;Unigene0029877;Unigene0031043;Unigene0032787;Unigene0035559;Unigene0036680	K00432+K00797+K10808+K00799+K01469+K00799+K00036+K00799+K00031+K01256+K00033+K00797+K21456+K00031+K00033+K10807+K00434+K01919+K00036+K01255
Cyanoamino acid metabolism	9	58	0.982912	1	ko00460	Unigene0001331;Unigene0004182;Unigene0006160;Unigene0007383;Unigene0034673;Unigene0034809;Unigene0034969;Unigene0036701;Unigene0036862	K05349+K05349+K01188+K00600+K05350+K01188+K01188+K13034+K05349
Taurine and hypotaurine metabolism	1	14	0.986072	1	ko00430	Unigene0006261	K01580
Flavonoid biosynthesis	10	65	0.987937	1	ko00941	Unigene0003014;Unigene0008630;Unigene0009525;Unigene0010398;Unigene0020883;Unigene0026802;Unigene0027796;Unigene0029986;Unigene0035606;Unigene0038346	K00487+K13082+K05280+K05278+K00475+K13065+K01859+K08695+K13065+K00588
Fatty acid elongation	5	42	0.993411	1	ko00062	Unigene0006389;Unigene0008332;Unigene0011780;Unigene0021512;Unigene0029571	K15397+K01076+K07512+K10251+K15397
ABC transporters	6	49	0.995132	1	ko02010	Unigene0000572;Unigene0008305;Unigene0014744;Unigene0023082;Unigene0031053;Unigene0035324	K05658+K05656+K05674+K05663+K05655+K05643
Stilbenoid, diarylheptanoid and gingerol biosynthesis	4	38	0.995577	1	ko00945	Unigene0003014;Unigene0026802;Unigene0035606;Unigene0038346	K00487+K13065+K13065+K00588
Cutin, suberine and wax biosynthesis	1	19	0.996982	1	ko00073	Unigene0031312	K17991
Linoleic acid metabolism	2	31	0.999074	1	ko00591	Unigene0013989;Unigene0018121	K14674+K00454
Tryptophan metabolism	6	57	0.999131	1	ko00380	Unigene0018281;Unigene0020854;Unigene0026999;Unigene0027704;Unigene0034321;Unigene0036380	K11820+K22450+K22450+K11820+K00128+K00128
MAPK signaling pathway - plant	30	187	0.999748	1	ko04016	Unigene0000028;Unigene0004240;Unigene0005802;Unigene0007702;Unigene0008967;Unigene0010979;Unigene0011128;Unigene0013969;Unigene0014442;Unigene0015259;Unigene0016518;Unigene0016776;Unigene0017075;Unigene0019954;Unigene0021611;Unigene0023688;Unigene0029005;Unigene0029083;Unigene0029667;Unigene0030576;Unigene0031395;Unigene0032037;Unigene0032045;Unigene0033766;Unigene0034099;Unigene0035229;Unigene00…	K20717+K20553+K20718+K14516+K14509+K13424+K02183+K20536+K20726+K17686+K14497+K20538+K13414+K20725+K14498+K13449+K14514+K14514+K20725+K20717+K02183+K14496+K13422+K13420+K13414+K14510+K20538+K20714+K20606+K17686
Phenylpropanoid biosynthesis	21	149	0.999907	1	ko00940	Unigene0000536;Unigene0001331;Unigene0003014;Unigene0004182;Unigene0004603;Unigene0006118;Unigene0006160;Unigene0013889;Unigene0014434;Unigene0024606;Unigene0026802;Unigene0026953;Unigene0027083;Unigene0028130;Unigene0034673;Unigene0034809;Unigene0034969;Unigene0035606;Unigene0036862;Unigene0038346;Unigene0039280	K01904+K05349+K00487+K05349+K18368+K00083+K01188+K00430+K00430+K01904+K13065+K12356+K00430+K22395+K05350+K01188+K01188+K13065+K05349+K00588+K01904
Plant-pathogen interaction	69	376	0.999927	1	ko04626	Unigene0000437;Unigene0000549;Unigene0001748;Unigene0001790;Unigene0001857;Unigene0002129;Unigene0002751;Unigene0002991;Unigene0003554;Unigene0004738;Unigene0005143;Unigene0005667;Unigene0005911;Unigene0006389;Unigene0006539;Unigene0009004;Unigene0010010;Unigene0010654;Unigene0010705;Unigene0010979;Unigene0011128;Unigene0012637;Unigene0013017;Unigene0013969;Unigene0014932;Unigene0014933;Unigene00…	K13412+K13412+K13448+K09422+K09422+K09422+K13412+K09422+K09422+K13448+K05391+K09422+K13412+K15397+K09422+K09487+K09422+K09422+K13448+K13424+K02183+K09422+K13459+K20536+K02358+K02358+K02358+K13414+K05391+K09422+K09422+K13412+K13448+K09422+K13457+K13448+K09422+K09487+K13448+K13449+K13448+K09422+K05391+K18835+K13459+K09422+K15397+K05391+K13448+K02183+K09422+K00864+K13436+K09422+K09422+K13448+K13420+…
Plant hormone signal transduction	45	273	0.99997	1	ko04075	Unigene0000031;Unigene0000119;Unigene0001661;Unigene0002535;Unigene0003480;Unigene0004778;Unigene0007702;Unigene0008056;Unigene0008201;Unigene0008202;Unigene0008554;Unigene0008967;Unigene0010920;Unigene0010952;Unigene0011743;Unigene0013243;Unigene0013581;Unigene0016518;Unigene0016558;Unigene0019431;Unigene0020037;Unigene0021611;Unigene0022220;Unigene0023688;Unigene0024346;Unigene0026285;Unigene00…	K14489+K13415+K14431+K14431+K13464+K14488+K14516+K14484+K14488+K14488+K14488+K14509+K14508+K13946+K14486+K14491+K13464+K14497+K14488+K14491+K14488+K14498+K14484+K13449+K14432+K14432+K14514+K14514+K14485+K14496+K13422+K14494+K13464+K14503+K14493+K14488+K14491+K13464+K14510+K14432+K14486+K14506+K14486+K14484+K14487
Ribosome	58	388	1	1	ko03010	Unigene0001272;Unigene0001659;Unigene0002194;Unigene0003194;Unigene0003434;Unigene0004162;Unigene0004950;Unigene0005795;Unigene0006509;Unigene0009323;Unigene0009806;Unigene0011366;Unigene0012537;Unigene0012625;Unigene0013865;Unigene0014383;Unigene0014958;Unigene0015350;Unigene0017084;Unigene0017333;Unigene0017895;Unigene0017938;Unigene0018076;Unigene0018341;Unigene0019044;Unigene0019250;Unigene00…	K02896+K02882+K02902+K02941+K02935+K02871+K02881+K02952+K02925+K02949+K02906+K02892+K02896+K02940+K02922+K02867+K02868+K02948+K02883+K02975+K02981+K02939+K02864+K02935+K02990+K02995+K02974+K02950+K02989+K02872+K02881+K02881+K02908+K02985+K02930+K02930+K02887+K02904+K02934+K02921+K02911+K02923+K02936+K02903+K02935+K02987+K02984+K02937+K02988+K02910+K02935+K02906+K02863+K02946+K02899+K02897+K02976+…

## Sheet: ZPCA
KEGG analysis result for single-copy genes in Chaenomeles speciosa (ZPCA)
Pathway	out (1529)	All (7159)	Pvalue	Qvalue	Pathway ID	Genes	K_IDs
Purine metabolism	74	224	2.55409e-05	0.0013747	ko00230	Unigene0001429;Unigene0002141;Unigene0002431;Unigene0003289;Unigene0003680;Unigene0003880;Unigene0004315;Unigene0004566;Unigene0004677;Unigene0004827;Unigene0004891;Unigene0005520;Unigene0005892;Unigene0006351;Unigene0006373;Unigene0006647;Unigene0006865;Unigene0007911;Unigene0009744;Unigene0009978;Unigene0011052;Unigene0011158;Unigene0013640;Unigene0013641;Unigene0014202;Unigene0014666;Unigene00…	K03023+K03005+K03787+K00873+K01488+K02999+K03019+K00951+K01514+K03024+K01510+K03505+K01945+K01081+K03013+K01951+K03010+K01519+K00939+K01490+K02327+K03002+K00873+K00873+K11808+K00948+K00939+K02326+K02083+K14977+K03006+K03021+K00873+K03505+K01835+K01835+K01510+K03025+K03017+K01490+K01939+K10808+K10807+K18453+K00764+K03016+K03504+K01756+K00873+K01517+K03026+K00873+K00939+K03506+K00962+K00951+K00365+…
Non-homologous end-joining	8	9	3.1146e-05	0.0013747	ko03450	Unigene0004763;Unigene0005352;Unigene0030645;Unigene0040444;Unigene0040777;Unigene0042817;Unigene0045962;Unigene0046904	K03512+K10866+K10865+K10886+K04799+K10885+K10777+K10884
Nucleotide excision repair	36	89	3.19697e-05	0.0013747	ko03420	Unigene0000531;Unigene0000955;Unigene0001180;Unigene0002257;Unigene0002542;Unigene0003240;Unigene0004427;Unigene0005520;Unigene0007460;Unigene0008038;Unigene0009293;Unigene0009865;Unigene0011052;Unigene0013251;Unigene0015815;Unigene0017036;Unigene0018969;Unigene0020722;Unigene0021884;Unigene0021946;Unigene0024047;Unigene0026774;Unigene0027733;Unigene0030654;Unigene0033778;Unigene0037861;Unigene00…	K03141+K10754+K10747+K10844+K10755+K10609+K07466+K03505+K07466+K10755+K10846+K10755+K02327+K10838+K04802+K02326+K10610+K10739+K10839+K03505+K10840+K10839+K10843+K03504+K03506+K10740+K07466+K10841+K02335+K02202+K10756+K03143+K02328+K10747+K06634+K10848
Base excision repair	24	54	0.000115721	0.00312491	ko03410	Unigene0001180;Unigene0002480;Unigene0004763;Unigene0005520;Unigene0009227;Unigene0010267;Unigene0011052;Unigene0015815;Unigene0015821;Unigene0017036;Unigene0021946;Unigene0023905;Unigene0030654;Unigene0032730;Unigene0033778;Unigene0037549;Unigene0040777;Unigene0041702;Unigene0043597;Unigene0043903;Unigene0044057;Unigene0045489;Unigene0046218;Unigene0047465	K10747+K03575+K03512+K03505+K10773+K10801+K02327+K04802+K01247+K02326+K03505+K01246+K03504+K03648+K03506+K03660+K04799+K02335+K01246+K02328+K01142+K10747+K10803+K01247
Spliceosome	88	288	0.000121121	0.00312491	ko03040	Unigene0000090;Unigene0000103;Unigene0000140;Unigene0000145;Unigene0001131;Unigene0001316;Unigene0001341;Unigene0001528;Unigene0002247;Unigene0003000;Unigene0004015;Unigene0004037;Unigene0004181;Unigene0004972;Unigene0005020;Unigene0005123;Unigene0006008;Unigene0006288;Unigene0006982;Unigene0007485;Unigene0008781;Unigene0009406;Unigene0011059;Unigene0012420;Unigene0012512;Unigene0012647;Unigene00…	K12830+K12860+K12867+K12812+K12855+K03283+K12875+K11092+K12865+K12900+K12882+K11094+K12823+K12826+K11984+K12823+K12818+K12829+K12662+K12869+K12818+K12825+K12741+K12627+K12823+K12897+K12870+K12890+K12821+K11088+K12820+K12833+K11087+K12835+K12836+K12839+K12741+K12836+K12812+K13025+K12828+K12821+K12850+K12858+K12897+K12623+K11099+K12818+K12842+K12890+K12837+K12831+K12876+K12837+K12878+K12856+K03283+…
N-Glycan biosynthesis	24	57	0.000317928	0.00683546	ko00510	Unigene0000229;Unigene0000290;Unigene0002786;Unigene0004337;Unigene0005510;Unigene0008511;Unigene0011206;Unigene0018152;Unigene0025402;Unigene0025692;Unigene0030021;Unigene0030022;Unigene0034461;Unigene0039063;Unigene0039470;Unigene0041108;Unigene0042772;Unigene0043001;Unigene0043696;Unigene0043811;Unigene0045141;Unigene0046585;Unigene0046928;Unigene0046985	K00726+K01228+K00902+K00737+K09658+K03843+K12670+K00737+K07151+K01230+K03849+K03849+K12666+K05546+K07432+K03842+K03850+K03846+K00737+K00729+K00721+K03847+K12667+K01231
Ribosome biogenesis in eukaryotes	39	111	0.000531098	0.00978738	ko03008	Unigene0000258;Unigene0000929;Unigene0005994;Unigene0006176;Unigene0006752;Unigene0007242;Unigene0007752;Unigene0008678;Unigene0014209;Unigene0016741;Unigene0020478;Unigene0020489;Unigene0022928;Unigene0025531;Unigene0026300;Unigene0026550;Unigene0026589;Unigene0027460;Unigene0027785;Unigene0027851;Unigene0028466;Unigene0029519;Unigene0029750;Unigene0031090;Unigene0031843;Unigene0032430;Unigene00…	K14554+K01164+K11130+K14558+K14568+K14538+K14559+K06943+K14574+K14536+K11131+K14548+K14573+K14290+K03097+K14572+K14561+K14569+K14549+K07562+K03537+K14560+K14567+K03539+K14566+K14552+K14521+K14546+K12619+K14571+K03538+K14537+K14550+K14565+K14556+K06943+K14563+K11108+K07936
Pyrimidine metabolism	48	145	0.000619256	0.00998551	ko00240	Unigene0000405;Unigene0001429;Unigene0002141;Unigene0002431;Unigene0003880;Unigene0004315;Unigene0004827;Unigene0004891;Unigene0005143;Unigene0005520;Unigene0005796;Unigene0006351;Unigene0006373;Unigene0006865;Unigene0008900;Unigene0011052;Unigene0011158;Unigene0011247;Unigene0011694;Unigene0014049;Unigene0014661;Unigene0017036;Unigene0020309;Unigene0020421;Unigene0021946;Unigene0025227;Unigene00…	K01955+K03023+K03005+K03787+K02999+K03019+K03024+K01510+K01464+K03505+K00609+K01081+K03013+K03010+K13998+K02327+K03002+K00876+K13421+K01956+K16329+K02326+K03006+K03021+K03505+K01510+K03025+K03017+K10808+K10807+K03016+K03504+K03026+K03506+K13800+K00962+K01431+K03015+K00962+K01465+K02335+K14641+K03020+K03012+K00943+K00254+K02328+K01513
Mismatch repair	25	64	0.000925034	0.0132588	ko03430	Unigene0000955;Unigene0001180;Unigene0002542;Unigene0004427;Unigene0005520;Unigene0007460;Unigene0008038;Unigene0009865;Unigene0010718;Unigene0011052;Unigene0013444;Unigene0015815;Unigene0017473;Unigene0020722;Unigene0021946;Unigene0022327;Unigene0026484;Unigene0030654;Unigene0032987;Unigene0037861;Unigene0038625;Unigene0043329;Unigene0043670;Unigene0043903;Unigene0045489	K10754+K10747+K10755+K07466+K03505+K07466+K10755+K10755+K03111+K02327+K08737+K04802+K10858+K10739+K03505+K08739+K07456+K03504+K08735+K10740+K07466+K10756+K08734+K02328+K10747
Aminoacyl-tRNA biosynthesis	31	86	0.00118464	0.0152819	ko00970	Unigene0000218;Unigene0000252;Unigene0000365;Unigene0000591;Unigene0001166;Unigene0001398;Unigene0001688;Unigene0004675;Unigene0008560;Unigene0011806;Unigene0012269;Unigene0012339;Unigene0013447;Unigene0013695;Unigene0016217;Unigene0018002;Unigene0018053;Unigene0019872;Unigene0022149;Unigene0023213;Unigene0026636;Unigene0028060;Unigene0030093;Unigene0030536;Unigene0038389;Unigene0041715;Unigene00…	K02434+K01870+K01873+K01868+K01872+K01889+K01873+K01883+K14164+K01875+K01887+K01889+K01869+K01876+K04567+K01890+K00604+K01893+K01893+K01874+K01874+K01880+K01866+K01868+K01869+K01875+K01872+K01881+K01867+K01883+K01886
Terpenoid backbone biosynthesis	22	58	0.00284621	0.0333783	ko00900	Unigene0001731;Unigene0002603;Unigene0008430;Unigene0011482;Unigene0011955;Unigene0012023;Unigene0012374;Unigene0012793;Unigene0016620;Unigene0023218;Unigene0023721;Unigene0024417;Unigene0025745;Unigene0027045;Unigene0027115;Unigene0029051;Unigene0029219;Unigene0033830;Unigene0037336;Unigene0038425;Unigene0043846;Unigene0047890	K11778+K01597+K01662+K00021+K00099+K00919+K00021+K03526+K05906+K01823+K11778+K05356+K05955+K01641+K00991+K13789+K10960+K11778+K13789+K15891+K01662+K06013
Folate biosynthesis	12	26	0.00410607	0.0441403	ko00790	Unigene0004276;Unigene0006452;Unigene0006732;Unigene0008900;Unigene0025804;Unigene0034520;Unigene0042368;Unigene0043103;Unigene0043688;Unigene0044690;Unigene0045516;Unigene0047755	K00079+K18482+K01930+K13998+K15631+K01930+K18482+K13941+K01724+K15376+K03637+K20457
RNA transport	78	291	0.0140463	0.139383	ko03013	Unigene0000145;Unigene0000199;Unigene0000929;Unigene0000996;Unigene0001224;Unigene0001341;Unigene0001530;Unigene0001665;Unigene0002038;Unigene0004015;Unigene0004338;Unigene0005104;Unigene0007569;Unigene0008431;Unigene0008572;Unigene0008583;Unigene0009501;Unigene0010571;Unigene0010844;Unigene0012063;Unigene0012294;Unigene0013685;Unigene0013826;Unigene0014218;Unigene0014351;Unigene0015686;Unigene00…	K12812+K14288+K01164+K14289+K09291+K12875+K03247+K03236+K14305+K12882+K00784+K14310+K03113+K14293+K14315+K13126+K14327+K14318+K03680+K05749+K14317+K03260+K14304+K03257+K03250+K14298+K03252+K14004+K13114+K03242+K14319+K13126+K12812+K05019+K13025+K03754+K03260+K14290+K13151+K03248+K07562+K14300+K03537+K14312+K14324+K13130+K03539+K12876+K14326+K12878+K03260+K03680+K03251+K00784+K12879+K03262+K03243+…
Porphyrin and chlorophyll metabolism	19	55	0.0163282	0.142302	ko00860	Unigene0000242;Unigene0001426;Unigene0004683;Unigene0008306;Unigene0016672;Unigene0020971;Unigene0025366;Unigene0025601;Unigene0028677;Unigene0029219;Unigene0031232;Unigene0037929;Unigene0038296;Unigene0038726;Unigene0040927;Unigene0041471;Unigene0041836;Unigene0042770;Unigene0046566	K00231+K08099+K01599+K04035+K13545+K01599+K01749+K03404+K13606+K10960+K02492+K00231+K13071+K01772+K02259+K18010+K04040+K01772+K08101
Basal transcription factors	20	59	0.0173503	0.142302	ko03022	Unigene0000531;Unigene0002257;Unigene0002312;Unigene0003482;Unigene0003813;Unigene0004044;Unigene0006896;Unigene0007975;Unigene0020982;Unigene0025849;Unigene0027733;Unigene0029323;Unigene0031404;Unigene0043232;Unigene0043584;Unigene0044816;Unigene0045327;Unigene0045658;Unigene0045965;Unigene0047250	K03141+K10844+K03129+K03125+K14649+K03124+K03135+K03138+K03133+K03123+K10843+K03130+K03124+K02202+K03143+K03132+K03128+K06634+K03136+K03137
One carbon pool by folate	11	27	0.0176499	0.142302	ko00670	Unigene0000625;Unigene0002075;Unigene0002747;Unigene0003046;Unigene0008900;Unigene0011444;Unigene0018053;Unigene0042566;Unigene0043657;Unigene0044344;Unigene0044954	K01938+K00288+K01934+K00297+K13998+K00605+K00604+K00600+K01934+K00602+K01433
Phenylalanine, tyrosine and tryptophan biosynthesis	20	60	0.0209461	0.150637	ko00400	Unigene0002133;Unigene0003017;Unigene0004474;Unigene0004620;Unigene0009509;Unigene0011668;Unigene0018122;Unigene0023134;Unigene0026017;Unigene0030948;Unigene0031789;Unigene0031790;Unigene0036178;Unigene0036672;Unigene0041993;Unigene0043704;Unigene0045136;Unigene0045538;Unigene0046150;Unigene0046543	K14454+K01657+K01695+K00817+K00891+K01626+K15227+K00800+K01696+K00815+K01626+K01626+K00811+K01735+K05359+K01658+K15227+K01817+K01626+K14455
Vitamin B6 metabolism	9	21	0.0217175	0.150637	ko00750	Unigene0000144;Unigene0003438;Unigene0004380;Unigene0017034;Unigene0018084;Unigene0022459;Unigene0029766;Unigene0041746;Unigene0047107	K01733+K00831+K08681+K05275+K06215+K00275+K00868+K01733+K00275
Glycosylphosphatidylinositol(GPI)-anchor biosynthesis	13	35	0.023683	0.150637	ko00563	Unigene0002733;Unigene0003398;Unigene0005510;Unigene0008677;Unigene0010786;Unigene0012307;Unigene0015470;Unigene0025112;Unigene0031376;Unigene0034295;Unigene0044484;Unigene0046776;Unigene0047512	K05286+K03859+K09658+K03861+K03434+K05310+K05292+K05290+K05291+K11001+K07541+K05284+K03857
mRNA surveillance pathway	48	172	0.0237702	0.150637	ko03015	Unigene0000128;Unigene0000145;Unigene0000343;Unigene0001341;Unigene0003088;Unigene0004015;Unigene0004017;Unigene0004322;Unigene0005055;Unigene0006658;Unigene0008583;Unigene0009501;Unigene0010494;Unigene0016553;Unigene0016944;Unigene0017787;Unigene0019366;Unigene0019386;Unigene0020598;Unigene0020635;Unigene0021819;Unigene0023144;Unigene0023316;Unigene0023839;Unigene0024874;Unigene0024893;Unigene00…	K14376+K12812+K14401+K12875+K14396+K12882+K14402+K14407+K14962+K14404+K13126+K14327+K14397+K06965+K03456+K14962+K14396+K03456+K13114+K06100+K06100+K13126+K12812+K13025+K14403+K14409+K00565+K14411+K04382+K14400+K11584+K14324+K12876+K14406+K14326+K14411+K14399+K12877+K13917+K14416+K13917+K14404+K11584+K00565+K11583+K13126+K03267+K14411
RNA degradation	45	160	0.0245223	0.150637	ko03018	Unigene0000068;Unigene0001110;Unigene0001265;Unigene0001513;Unigene0002814;Unigene0003118;Unigene0003822;Unigene0004150;Unigene0004577;Unigene0007370;Unigene0008583;Unigene0009182;Unigene0012420;Unigene0016621;Unigene0017144;Unigene0019076;Unigene0019810;Unigene0023144;Unigene0023455;Unigene0026151;Unigene0028269;Unigene0029808;Unigene0029817;Unigene0030755;Unigene0035433;Unigene0037550;Unigene00…	K12580+K12616+K12604+K12603+K12617+K12593+K00850+K01148+K01689+K00850+K13126+K00850+K12627+K04077+K04077+K12598+K12605+K13126+K11600+K01689+K12623+K12585+K01689+K10643+K00962+K03681+K12599+K12591+K12619+K00962+K12581+K04077+K12581+K12598+K13126+K12603+K12614+K12607+K12587+K12608+K10643+K03678+K12603+K12600+K12608
Valine, leucine and isoleucine biosynthesis	10	26	0.0352271	0.197578	ko00290	Unigene0010057;Unigene0012808;Unigene0015505;Unigene0020054;Unigene0021725;Unigene0024159;Unigene0031039;Unigene0041114;Unigene0042221;Unigene0045734	K01687+K01754+K01649+K00052+K01703+K00826+K01704+K00053+K00826+K01653
Isoquinoline alkaloid biosynthesis	10	26	0.0352271	0.197578	ko00950	Unigene0002133;Unigene0012051;Unigene0019537;Unigene0030948;Unigene0036178;Unigene0036641;Unigene0044938;Unigene0044939;Unigene0046543;Unigene0046879	K14454+K00422+K00276+K00815+K00811+K00422+K00422+K00422+K14455+K00422
Nicotinate and nicotinamide metabolism	9	23	0.0401442	0.215775	ko00760	Unigene0002431;Unigene0002856;Unigene0006351;Unigene0022037;Unigene0030954;Unigene0031126;Unigene0041151;Unigene0044331;Unigene0047333	K03787+K00763+K01081+K00858+K00767+K18551+K01950+K01513+K18551
Proteasome	25	87	0.0631617	0.287136	ko03050	Unigene0000676;Unigene0004470;Unigene0004734;Unigene0005391;Unigene0007556;Unigene0008110;Unigene0010174;Unigene0012302;Unigene0014296;Unigene0015321;Unigene0016353;Unigene0022894;Unigene0023225;Unigene0023787;Unigene0024532;Unigene0025863;Unigene0028371;Unigene0031364;Unigene0038873;Unigene0043587;Unigene0044024;Unigene0044341;Unigene0045318;Unigene0045655;Unigene0047172	K06699+K02735+K03031+K02739+K02730+K06700+K03037+K03029+K03066+K03033+K03036+K02726+K02731+K03028+K02729+K03064+K03065+K03033+K10881+K06691+K02727+K03063+K03030+K03039+K03062
Galactose metabolism	23	79	0.0638241	0.287136	ko00052	Unigene0003822;Unigene0007370;Unigene0008686;Unigene0009182;Unigene0015674;Unigene0018041;Unigene0022014;Unigene0024349;Unigene0028717;Unigene0028742;Unigene0029046;Unigene0030342;Unigene0034382;Unigene0035372;Unigene0036838;Unigene0039438;Unigene0040094;Unigene0042144;Unigene0044975;Unigene0045999;Unigene0046653;Unigene0046820;Unigene0047887	K00850+K00850+K12447+K00850+K06617+K06617+K01835+K01835+K00963+K07407+K00965+K06617+K01190+K00844+K01193+K01785+K12309+K01784+K01187+K06617+K00963+K18819+K18819
[truncated: 103 more rows]

## Sheet: ZPLP
KEGG analysis result for single-copy genes in Chaenomeles speciosa(ZPLP)
Pathway	out (1525)	All (7126)	Pvalue	Qvalue	Pathway ID	Genes	K_IDs
[truncated: 129 more rows]

## Sheet: ZPLY
KEGG analysis result for single-copy genes in Chaenomeles speciosa(ZPLY)
Pathway	out (1527)	All (6410)	Pvalue	Qvalue	Pathway ID	Genes	K_IDs
[truncated: 129 more rows]

[truncated: 1 more sheets: ZPXC]
