# Supplementary material for: Comparative transcriptomics provides a strategy for phylogenetic analysis and SSR marker development in Chaenomeles
Source: Sci Rep. 2021 Aug 12;11:16441. doi: 10.1038/s41598-021-95776-z (PMC8361139; doi:10.1038/s41598-021-95776-z)
Supplement: Supplementary file 6 — Supplementary Table S5. [file 41598_2021_95776_MOESM6_ESM.xlsx]

## Sheet: A
				Common single-copy genes in 10 Chaenomeles germplams
Ortholog Id	ZPLY	DY	XZ	MY	ZPCA	ZPLP	ZPXC	RB	GP	MYXZ	XZSS	Ka	Ks	Ka/Ks	tree length for dN	tree length for dS
ORTHOMCL7445	Unigene0012571	Unigene0036220	Unigene0042762	Unigene0004110	Unigene0045318	Unigene0005709	Unigene0027241	Unigene0008040	Unigene0033529	Unigene0002643	Unigene0007188	0.000147368	0.0164105	0.00898012	0.0029	0.3119
ORTHOMCL6013	Unigene0001461	Unigene0038586	Unigene0032712	Unigene0033736	Unigene0028851	Unigene0045948	Unigene0015379	Unigene0016141	Unigene0032861	Unigene0043975	Unigene0018924	0.000447368	0.0484895	0.00922609	0.0086	0.9214
ORTHOMCL7540	Unigene0017423	Unigene0028385	Unigene0017217	Unigene0017825	Unigene0024131	Unigene0023705	Unigene0002734	Unigene0021303	Unigene0029760	Unigene0014499	Unigene0019438	0.000110526	0.0115105	0.00960219	0.0021	0.2188
ORTHOMCL7609	Unigene0037390	Unigene0015450	Unigene0040556	Unigene0007213	Unigene0015815	Unigene0044964	Unigene0002797	Unigene0005141	Unigene0035518	Unigene0047362	Unigene0023813	0.000268421	0.0269316	0.00996678	0.005	0.5118
ORTHOMCL5281	Unigene0000565	Unigene0037533	Unigene0017790	Unigene0005913	Unigene0011494	Unigene0044968	Unigene0029642	Unigene0001281	Unigene0042660	Unigene0038735	Unigene0020928	0.000252632	0.0253105	0.00998129	0.0049	0.4809
ORTHOMCL7576	Unigene0032405	Unigene0002761	Unigene0034713	Unigene0028036	Unigene0027585	Unigene0030245	Unigene0031005	Unigene0025239	Unigene0014136	Unigene0027809	Unigene0020024	0.000547368	0.0417842	0.0130999	0.0104	0.794
ORTHOMCL10326	Unigene0025934	Unigene0036548	Unigene0024335	Unigene0010692	Unigene0018084	Unigene0012901	Unigene0024314	Unigene0013515	Unigene0033829	Unigene0011960	Unigene0013785	0.000494737	0.0353737	0.013986	0.0094	0.6722
ORTHOMCL7776	Unigene0009601	Unigene0034535	Unigene0002988	Unigene0014722	Unigene0026021	Unigene0018627	Unigene0029507	Unigene0004395	Unigene0003971	Unigene0029329	Unigene0031249	0.000326316	0.0228316	0.0142923	0.0061	0.4339
ORTHOMCL8569	Unigene0026809	Unigene0039003	Unigene0037271	Unigene0012084	Unigene0009544	Unigene0003948	Unigene0017202	Unigene0031710	Unigene0010823	Unigene0022173	Unigene0012686	0.000305263	0.0197789	0.0154337	0.0058	0.3758
ORTHOMCL9787	Unigene0027689	Unigene0020544	Unigene0035133	Unigene0036212	Unigene0017332	Unigene0013607	Unigene0007132	Unigene0045538	Unigene0011368	Unigene0023898	Unigene0029039	0.000363158	0.0218263	0.0166385	0.0068	0.4146
ORTHOMCL10697	Unigene0036130	Unigene0017400	Unigene0042920	Unigene0019560	Unigene0046168	Unigene0025535	Unigene0043885	Unigene0030992	Unigene0040879	Unigene0029951	Unigene0015563	0.000715789	0.0421684	0.0169745	0.0137	0.8012
ORTHOMCL8307	Unigene0038545	Unigene0033724	Unigene0041331	Unigene0017469	Unigene0014507	Unigene0016721	Unigene0012634	Unigene0016298	Unigene0039517	Unigene0013715	Unigene0003578	0.000757895	0.0402158	0.0188457	0.0145	0.7641
ORTHOMCL7005	Unigene0020729	Unigene0002225	Unigene0030066	Unigene0032051	Unigene0023839	Unigene0019146	Unigene0021103	Unigene0022185	Unigene0023419	Unigene0011072	Unigene0002770	0.000636842	0.0330211	0.0192859	0.0122	0.6273
ORTHOMCL8331	Unigene0041383	Unigene0021353	Unigene0026344	Unigene0018176	Unigene0014296	Unigene0023503	Unigene0046791	Unigene0003610	Unigene0005853	Unigene0016922	Unigene0008887	0.000394737	0.0202842	0.0194603	0.0075	0.3857
ORTHOMCL9069	Unigene0011278	Unigene0020948	Unigene0042262	Unigene0016510	Unigene0027733	Unigene0033307	Unigene0035495	Unigene0004887	Unigene0030169	Unigene0006609	Unigene0010887	0.000152632	0.00756842	0.0201669	0.0029	0.1439
ORTHOMCL9482	Unigene0005985	Unigene0039109	Unigene0039765	Unigene0039700	Unigene0011479	Unigene0006358	Unigene0010158	Unigene0042180	Unigene0010522	Unigene0023623	Unigene0033730	0.000294737	0.0145158	0.0203046	0.0058	0.276
ORTHOMCL10771	Unigene0045871	Unigene0039436	Unigene0016912	Unigene0021096	Unigene0017474	Unigene0028314	Unigene0025575	Unigene0044568	Unigene0026039	Unigene0022143	Unigene0029422	0.00114211	0.0552316	0.0206785	0.0217	1.0492
ORTHOMCL5566	Unigene0041649	Unigene0034456	Unigene0025834	Unigene0018738	Unigene0012600	Unigene0014294	Unigene0029278	Unigene0046927	Unigene0027928	Unigene0021641	Unigene0001044	0.000668421	0.0318105	0.0210126	0.0128	0.6046
ORTHOMCL4770	Unigene0011637	Unigene0001241	Unigene0033679	Unigene0018516	Unigene0000179	Unigene0042155	Unigene0000171	Unigene0001512	Unigene0000550	Unigene0026024	Unigene0036582	0.00163158	0.0769632	0.0211995	0.0311	1.4622
ORTHOMCL9806	Unigene0040393	Unigene0021851	Unigene0039060	Unigene0031879	Unigene0019271	Unigene0029544	Unigene0020735	Unigene0024369	Unigene0021484	Unigene0030869	Unigene0007215	0.000415789	0.0191789	0.0216795	0.0077	0.3646
ORTHOMCL6295	Unigene0013564	Unigene0006101	Unigene0001745	Unigene0038164	Unigene0001665	Unigene0009685	Unigene0047394	Unigene0022677	Unigene0025900	Unigene0011800	Unigene0035579	0.00312632	0.143679	0.021759	0.0592	2.73
ORTHOMCL5074	Unigene0015758	Unigene0001043	Unigene0008846	Unigene0006545	Unigene0036307	Unigene0012369	Unigene0008886	Unigene0037694	Unigene0000382	Unigene0040866	Unigene0008972	0.000147368	0.00668947	0.0220299	0.003	0.1273
ORTHOMCL9644	Unigene0022229	Unigene0011293	Unigene0034275	Unigene0006535	Unigene0007569	Unigene0018408	Unigene0022429	Unigene0041469	Unigene0027752	Unigene0028598	Unigene0016415	0.000389474	0.0176737	0.0220369	0.0074	0.3359
ORTHOMCL10648	Unigene0031268	Unigene0038694	Unigene0036781	Unigene0014655	Unigene0042171	Unigene0024590	Unigene0021542	Unigene0045489	Unigene0020968	Unigene0040167	Unigene0022749	0.000805263	0.0359474	0.0224012	0.0153	0.6831
ORTHOMCL4493	Unigene0041346	Unigene0000050	Unigene0033496	Unigene0039019	Unigene0022949	Unigene0024840	Unigene0009236	Unigene0047292	Unigene0024893	Unigene0024172	Unigene0021910	0.000436842	0.0190842	0.0228902	0.0082	0.3628
ORTHOMCL9698	Unigene0039062	Unigene0006740	Unigene0014725	Unigene0037519	Unigene0041343	Unigene0018518	Unigene0009885	Unigene0030682	Unigene0041759	Unigene0009048	Unigene0013555	0.000410526	0.0176526	0.0232558	0.0079	0.3356
ORTHOMCL6729	Unigene0008263	Unigene0032940	Unigene0004865	Unigene0016773	Unigene0040864	Unigene0039680	Unigene0044483	Unigene0002010	Unigene0020899	Unigene0018535	Unigene0033725	0.000757895	0.0324474	0.0233577	0.0141	0.6165
ORTHOMCL5445	Unigene0038851	Unigene0039815	Unigene0025406	Unigene0016354	Unigene0025863	Unigene0031550	Unigene0000828	Unigene0043731	Unigene0035104	Unigene0016857	Unigene0022669	0.000936842	0.0376842	0.0248603	0.0178	0.7161
ORTHOMCL4923	Unigene0000357	Unigene0016149	Unigene0035216	Unigene0000377	Unigene0001312	Unigene0000881	Unigene0000263	Unigene0045870	Unigene0005876	Unigene0000695	Unigene0020521	0.000936842	0.0365579	0.0256263	0.018	0.6945
ORTHOMCL4603	Unigene0001676	Unigene0022116	Unigene0036692	Unigene0034394	Unigene0000090	Unigene0040253	Unigene0037205	Unigene0001542	Unigene0036052	Unigene0043779	Unigene0025141	0.000405263	0.0155579	0.0260487	0.0078	0.2956
ORTHOMCL8887	Unigene0043175	Unigene0037711	Unigene0016398	Unigene0022722	Unigene0021238	Unigene0015534	Unigene0014738	Unigene0006775	Unigene0006684	Unigene0020526	Unigene0004524	0.000605263	0.0231895	0.0261008	0.0116	0.4407
ORTHOMCL9593	Unigene0012589	Unigene0011981	Unigene0032460	Unigene0012440	Unigene0024631	Unigene0024999	Unigene0019467	Unigene0006370	Unigene0040526	Unigene0022849	Unigene0019250	0.00103158	0.0391105	0.026376	0.0197	0.7432
ORTHOMCL6900	Unigene0038021	Unigene0002141	Unigene0015596	Unigene0002240	Unigene0012030	Unigene0012706	Unigene0024007	Unigene0025232	Unigene0016326	Unigene0044266	Unigene0015195	0.000715789	0.0271316	0.0263822	0.0134	0.5155
ORTHOMCL5286	Unigene0000570	Unigene0008336	Unigene0021643	Unigene0022620	Unigene0028371	Unigene0020615	Unigene0043685	Unigene0017896	Unigene0022242	Unigene0020373	Unigene0006249	0.000768421	0.0291158	0.0263919	0.0146	0.5531
ORTHOMCL9335	Unigene0035766	Unigene0006329	Unigene0042299	Unigene0027372	Unigene0033114	Unigene0043137	Unigene0005545	Unigene0042093	Unigene0029544	Unigene0014286	Unigene0006509	0.000178947	0.00676842	0.0264386	0.0034	0.1286
ORTHOMCL7615	Unigene0004332	Unigene0002802	Unigene0036620	Unigene0012664	Unigene0040544	Unigene0037291	Unigene0029844	Unigene0004319	Unigene0034867	Unigene0014233	Unigene0010051	0.000847368	0.0317368	0.0266998	0.0161	0.6031
ORTHOMCL6330	Unigene0001692	Unigene0007691	Unigene0040822	Unigene0037977	Unigene0017614	Unigene0018321	Unigene0008413	Unigene0009620	Unigene0004539	Unigene0046672	Unigene0038762	0.000205263	0.00763158	0.0268966	0.004	0.1451
ORTHOMCL9273	Unigene0017005	Unigene0041060	Unigene0020921	Unigene0018944	Unigene0044971	Unigene0046241	Unigene0018297	Unigene0005343	Unigene0035566	Unigene0027976	Unigene0034890	0.0004	0.0143105	0.0279515	0.0076	0.2721
ORTHOMCL10714	Unigene0029631	Unigene0025241	Unigene0017374	Unigene0031652	Unigene0025885	Unigene0027491	Unigene0016280	Unigene0015840	Unigene0026791	Unigene0022730	Unigene0028394	0.000636842	0.0226105	0.0281657	0.0121	0.4296
ORTHOMCL9346	Unigene0040719	Unigene0034248	Unigene0034798	Unigene0016857	Unigene0005580	Unigene0028108	Unigene0007907	Unigene0042591	Unigene0035565	Unigene0028886	Unigene0015929	0.00159474	0.0550789	0.0289537	0.0302	1.0467
ORTHOMCL5233	Unigene0000517	Unigene0041373	Unigene0021261	Unigene0010336	Unigene0045052	Unigene0024954	Unigene0019659	Unigene0028324	Unigene0037304	Unigene0002807	Unigene0028734	0.00151579	0.0522737	0.0289972	0.0289	0.9933
ORTHOMCL10916	Unigene0042896	Unigene0021764	Unigene0033852	Unigene0037583	Unigene0044903	Unigene0045949	Unigene0042343	Unigene0031230	Unigene0032557	Unigene0044221	Unigene0029470	0.000978947	0.0318947	0.0306931	0.0187	0.606
ORTHOMCL9455	Unigene0005893	Unigene0041991	Unigene0034063	Unigene0006031	Unigene0027168	Unigene0040563	Unigene0029572	Unigene0026235	Unigene0018003	Unigene0021598	Unigene0019125	0.000878947	0.0286	0.0307324	0.0165	0.5435
ORTHOMCL5564	Unigene0038495	Unigene0024624	Unigene0028144	Unigene0026846	Unigene0029817	Unigene0028470	Unigene0017578	Unigene0005423	Unigene0016724	Unigene0020625	Unigene0001040	0.00121053	0.0383316	0.0315804	0.0229	0.7282
ORTHOMCL10426	Unigene0039023	Unigene0021601	Unigene0034609	Unigene0032313	Unigene0042788	Unigene0030858	Unigene0033318	Unigene0011743	Unigene0026522	Unigene0028814	Unigene0017961	0.000773684	0.0241474	0.0320401	0.0147	0.4589
ORTHOMCL10486	Unigene0018609	Unigene0033920	Unigene0035605	Unigene0020209	Unigene0012264	Unigene0016202	Unigene0016584	Unigene0040948	Unigene0035713	Unigene0026513	Unigene0019569	0.00133158	0.0413053	0.0322375	0.0252	0.7848
ORTHOMCL8872	Unigene0006242	Unigene0032996	Unigene0013893	Unigene0016308	Unigene0026111	Unigene0020971	Unigene0004493	Unigene0031508	Unigene0035485	Unigene0023993	Unigene0028913	0.000463158	0.0139316	0.0332452	0.0087	0.2648
ORTHOMCL10393	Unigene0011353	Unigene0021378	Unigene0023155	Unigene0032835	Unigene0021367	Unigene0043938	Unigene0029161	Unigene0036652	Unigene0041089	Unigene0029977	Unigene0030422	0.000221053	0.00658421	0.0335731	0.0042	0.1252
ORTHOMCL5280	Unigene0000564	Unigene0015845	Unigene0012166	Unigene0002351	Unigene0042566	Unigene0040822	Unigene0011728	Unigene0003038	Unigene0025891	Unigene0011686	Unigene0007383	0.000731579	0.0216947	0.0337215	0.0138	0.4123
ORTHOMCL7559	Unigene0041472	Unigene0024575	Unigene0039749	Unigene0033867	Unigene0045894	Unigene0002748	Unigene0003430	Unigene0043225	Unigene0021153	Unigene0003759	Unigene0028644	0.00108421	0.0321	0.033776	0.0206	0.61
ORTHOMCL9822	Unigene0038337	Unigene0024361	Unigene0010957	Unigene0007281	Unigene0024249	Unigene0025543	Unigene0017209	Unigene0046307	Unigene0028219	Unigene0012166	Unigene0016031	0.000978947	0.0287211	0.0340847	0.0186	0.546
ORTHOMCL4854	Unigene0000223	Unigene0013749	Unigene0002550	Unigene0011883	Unigene0022418	Unigene0026686	Unigene0022223	Unigene0005299	Unigene0042659	Unigene0028497	Unigene0015737	0.001	0.0290474	0.0344265	0.019	0.552
ORTHOMCL8213	Unigene0035832	Unigene0008502	Unigene0040091	Unigene0040657	Unigene0004338	Unigene0003468	Unigene0026707	Unigene0041644	Unigene0020874	Unigene0049186	Unigene0036576	0.000352632	0.0101	0.034914	0.0068	0.1919
ORTHOMCL9158	Unigene0042445	Unigene0005067	Unigene0021825	Unigene0027792	Unigene0041336	Unigene0024672	Unigene0028286	Unigene0026440	Unigene0028176	Unigene0023463	Unigene0025205	0.000921053	0.0261947	0.0351617	0.0175	0.4977
ORTHOMCL8716	Unigene0004203	Unigene0041499	Unigene0020868	Unigene0004479	Unigene0025937	Unigene0013903	Unigene0005664	Unigene0047141	Unigene0025964	Unigene0020700	Unigene0028776	0.00119474	0.0336842	0.0354688	0.0229	0.64
ORTHOMCL10322	Unigene0039086	Unigene0010668	Unigene0025783	Unigene0019733	Unigene0039621	Unigene0024475	Unigene0016038	Unigene0029524	Unigene0035189	Unigene0028143	Unigene0036442	0.000984211	0.0275842	0.0356802	0.0187	0.5241
ORTHOMCL7581	Unigene0023571	Unigene0039753	Unigene0024585	Unigene0019711	Unigene0002766	Unigene0021327	Unigene0043670	Unigene0012035	Unigene0030437	Unigene0047149	Unigene0030856	0.00166316	0.0465474	0.0357304	0.0317	0.8845
ORTHOMCL9614	Unigene0011978	Unigene0021863	Unigene0030270	Unigene0006413	Unigene0020435	Unigene0007976	Unigene0020311	Unigene0022160	Unigene0032027	Unigene0048782	Unigene0021035	0.000342105	0.00954211	0.0358522	0.0065	0.1814
ORTHOMCL9550	Unigene0032421	Unigene0032485	Unigene0010269	Unigene0030335	Unigene0008197	Unigene0024998	Unigene0006242	Unigene0038594	Unigene0023373	Unigene0018956	Unigene0026956	0.000442105	0.0122632	0.0360515	0.0084	0.2331
ORTHOMCL7787	Unigene0006659	Unigene0026456	Unigene0014629	Unigene0008695	Unigene0029304	Unigene0043008	Unigene0003000	Unigene0017040	Unigene0019270	Unigene0010381	Unigene0016697	0.00116842	0.0323158	0.0361564	0.0225	0.6138
ORTHOMCL10146	Unigene0019526	Unigene0011079	Unigene0022750	Unigene0009110	Unigene0015967	Unigene0039661	Unigene0033524	Unigene0025114	Unigene0019055	Unigene0046974	Unigene0034995	0.000868421	0.024	0.0361842	0.0164	0.4559
ORTHOMCL10343	Unigene0016481	Unigene0033889	Unigene0032361	Unigene0010800	Unigene0031896	Unigene0037461	Unigene0036834	Unigene0011707	Unigene0036757	Unigene0039572	Unigene0024860	0.000347368	0.00955263	0.0363636	0.0066	0.1815
ORTHOMCL9561	Unigene0006285	Unigene0006618	Unigene0037850	Unigene0018146	Unigene0047172	Unigene0045480	Unigene0023874	Unigene0010503	Unigene0032411	Unigene0028919	Unigene0024322	0.00139474	0.0381	0.0366073	0.0266	0.724
ORTHOMCL8940	Unigene0043889	Unigene0032219	Unigene0034299	Unigene0034815	Unigene0026589	Unigene0043755	Unigene0046878	Unigene0042208	Unigene0004612	Unigene0030160	Unigene0029344	0.000731579	0.0199211	0.0367239	0.0137	0.3787
ORTHOMCL7955	Unigene0011726	Unigene0039654	Unigene0015498	Unigene0035851	Unigene0003161	Unigene0039662	Unigene0016242	Unigene0044847	Unigene0027159	Unigene0009296	Unigene0011511	0.000515789	0.0140211	0.0367868	0.0098	0.2663
ORTHOMCL8830	Unigene0004423	Unigene0005050	Unigene0004791	Unigene0010762	Unigene0029219	Unigene0027809	Unigene0023055	Unigene0023912	Unigene0026435	Unigene0031089	Unigene0009610	0.00121053	0.0327421	0.0369715	0.0228	0.6221
ORTHOMCL6091	Unigene0044395	Unigene0039274	Unigene0008848	Unigene0008039	Unigene0002257	Unigene0001881	Unigene0001514	Unigene0008606	Unigene0002229	Unigene0002599	Unigene0038960	0.000189474	0.00510526	0.0371134	0.0037	0.0969
ORTHOMCL10215	Unigene0011939	Unigene0035251	Unigene0036874	Unigene0032026	Unigene0026927	Unigene0030610	Unigene0042679	Unigene0030941	Unigene0039917	Unigene0009738	Unigene0014493	0.000584211	0.0154632	0.0377808	0.0112	0.2938
ORTHOMCL9749	Unigene0007144	Unigene0039030	Unigene0019950	Unigene0019764	Unigene0027106	Unigene0026693	Unigene0046621	Unigene0040284	Unigene0036502	Unigene0006957	Unigene0022411	0.000336842	0.00873684	0.0385542	0.0064	0.1661
ORTHOMCL5035	Unigene0013244	Unigene0004149	Unigene0014309	Unigene0016792	Unigene0025106	Unigene0039760	Unigene0022685	Unigene0000350	Unigene0033470	Unigene0018391	Unigene0002844	0.000457895	0.0117895	0.0388393	0.0085	0.2239
ORTHOMCL7510	Unigene0034708	Unigene0002708	Unigene0004176	Unigene0033911	Unigene0040049	Unigene0040019	Unigene0029095	Unigene0002757	Unigene0042791	Unigene0025236	Unigene0033599	0.001	0.0256789	0.0389424	0.0188	0.4879
ORTHOMCL10300	Unigene0036241	Unigene0017263	Unigene0039721	Unigene0032196	Unigene0020922	Unigene0037742	Unigene0015045	Unigene0024968	Unigene0023565	Unigene0049360	Unigene0010455	0.000778947	0.0198947	0.0391534	0.0147	0.3782
ORTHOMCL10785	Unigene0028777	Unigene0017392	Unigene0037282	Unigene0018163	Unigene0028269	Unigene0023723	Unigene0032458	Unigene0034944	Unigene0030108	Unigene0030089	Unigene0030777	0.000510526	0.0128789	0.0396404	0.0096	0.2448
ORTHOMCL7727	Unigene0011025	Unigene0036184	Unigene0002939	Unigene0039746	Unigene0044884	Unigene0044748	Unigene0034133	Unigene0030884	Unigene0011466	Unigene0006429	Unigene0037534	0.000594737	0.0149263	0.0398449	0.0114	0.2836
ORTHOMCL8224	Unigene0041119	Unigene0041318	Unigene0011641	Unigene0003651	Unigene0033813	Unigene0041526	Unigene0014234	Unigene0021340	Unigene0026369	Unigene0003484	Unigene0021765	0.000389474	0.00976316	0.0398922	0.0072	0.1857
ORTHOMCL9772	Unigene0032198	Unigene0007076	Unigene0026521	Unigene0022006	Unigene0041765	Unigene0029734	Unigene0029846	Unigene0031048	Unigene0011318	Unigene0039499	Unigene0010966	0.000421053	0.0105	0.0401003	0.0081	0.1996
ORTHOMCL10783	Unigene0037416	Unigene0028093	Unigene0033939	Unigene0017621	Unigene0029824	Unigene0028305	Unigene0043113	Unigene0041609	Unigene0033976	Unigene0017331	Unigene0030663	0.00116842	0.0287789	0.0405999	0.0224	0.547
ORTHOMCL10818	Unigene0042632	Unigene0018210	Unigene0025731	Unigene0021168	Unigene0042820	Unigene0042114	Unigene0043679	Unigene0029934	Unigene0038433	Unigene0023150	Unigene0020327	0.000284211	0.00697368	0.0407547	0.0055	0.1326
ORTHOMCL8829	Unigene0017315	Unigene0016700	Unigene0017159	Unigene0017492	Unigene0015835	Unigene0011413	Unigene0004422	Unigene0017986	Unigene0023434	Unigene0011249	Unigene0020511	0.000668421	0.0163842	0.0407967	0.0128	0.3113
ORTHOMCL9785	Unigene0020062	Unigene0035680	Unigene0022519	Unigene0034456	Unigene0019545	Unigene0025823	Unigene0030424	Unigene0007118	Unigene0041197	Unigene0024030	Unigene0021383	0.00143158	0.0341421	0.04193	0.0272	0.6488
ORTHOMCL9817	Unigene0043474	Unigene0018159	Unigene0038114	Unigene0036648	Unigene0044193	Unigene0029727	Unigene0029327	Unigene0007261	Unigene0028487	Unigene0036676	Unigene0030098	0.00148947	0.0348789	0.0427041	0.0285	0.6629
ORTHOMCL7399	Unigene0039141	Unigene0040465	Unigene0017247	Unigene0018047	Unigene0021583	Unigene0029587	Unigene0025626	Unigene0018094	Unigene0036181	Unigene0024654	Unigene0002595	0.000210526	0.0049	0.0429646	0.004	0.0932
ORTHOMCL5583	Unigene0006840	Unigene0007482	Unigene0005890	Unigene0001076	Unigene0045455	Unigene0030706	Unigene0014326	Unigene0037390	Unigene0017945	Unigene0024307	Unigene0019339	0.00203158	0.0467737	0.0434342	0.0385	0.8889
ORTHOMCL8140	Unigene0019753	Unigene0024097	Unigene0016097	Unigene0005405	Unigene0007401	Unigene0003380	Unigene0011893	Unigene0008447	Unigene0027513	Unigene0007390	Unigene0014958	0.00105789	0.0239842	0.044108	0.0201	0.4558
ORTHOMCL6221	Unigene0022706	Unigene0002530	Unigene0016767	Unigene0003841	Unigene0008737	Unigene0008834	Unigene0001618	Unigene0005621	Unigene0032819	Unigene0004001	Unigene0012576	0.00127895	0.0287	0.0445626	0.0243	0.5454
ORTHOMCL8582	Unigene0019678	Unigene0041524	Unigene0041502	Unigene0018485	Unigene0044243	Unigene0025761	Unigene0003966	Unigene0031108	Unigene0014457	Unigene0015642	Unigene0034999	0.000421053	0.00937895	0.0448934	0.008	0.1783
ORTHOMCL9127	Unigene0004999	Unigene0008241	Unigene0006258	Unigene0032594	Unigene0041754	Unigene0011900	Unigene0009235	Unigene0020687	Unigene0018577	Unigene0047514	Unigene0027384	0.000847368	0.0188368	0.0449846	0.016	0.3579
ORTHOMCL5729	Unigene0007134	Unigene0022998	Unigene0028765	Unigene0003775	Unigene0022828	Unigene0044356	Unigene0040681	Unigene0042589	Unigene0001225	Unigene0039348	Unigene0026753	0.000531579	0.0117368	0.0452915	0.0103	0.2231
ORTHOMCL8542	Unigene0004666	Unigene0003914	Unigene0023823	Unigene0031240	Unigene0005308	Unigene0042650	Unigene0031186	Unigene0007748	Unigene0019367	Unigene0047885	Unigene0025005	0.00122105	0.0267211	0.0456963	0.0231	0.5078
ORTHOMCL5204	Unigene0000494	Unigene0037258	Unigene0023077	Unigene0035085	Unigene0030003	Unigene0044648	Unigene0047756	Unigene0004237	Unigene0018972	Unigene0046011	Unigene0039216	0.00173684	0.0378474	0.0458907	0.033	0.7191
ORTHOMCL10462	Unigene0038111	Unigene0012059	Unigene0033530	Unigene0016847	Unigene0028812	Unigene0032720	Unigene0017396	Unigene0029744	Unigene0018387	Unigene0024962	Unigene0029655	0.00207368	0.0449789	0.0461034	0.0395	0.8546
ORTHOMCL8066	Unigene0015885	Unigene0027600	Unigene0026396	Unigene0029053	Unigene0038383	Unigene0003294	Unigene0037029	Unigene0045511	Unigene0041448	Unigene0034979	Unigene0023191	0.000363158	0.00786842	0.0461538	0.0072	0.1494
ORTHOMCL5092	Unigene0042249	Unigene0007952	Unigene0021009	Unigene0035342	Unigene0027860	Unigene0040321	Unigene0041966	Unigene0000401	Unigene0013993	Unigene0004085	Unigene0032216	0.000710526	0.0153842	0.0461854	0.0135	0.2923
ORTHOMCL8315	Unigene0003590	Unigene0010958	Unigene0005284	Unigene0037356	Unigene0021406	Unigene0023373	Unigene0022293	Unigene0021971	Unigene0011800	Unigene0019430	Unigene0022711	0.000563158	0.0121	0.046542	0.0108	0.2301
ORTHOMCL8670	Unigene0010977	Unigene0023777	Unigene0033101	Unigene0040234	Unigene0043455	Unigene0004109	Unigene0046266	Unigene0019963	Unigene0042583	Unigene0008068	Unigene0012625	0.0009	0.0191737	0.0469393	0.017	0.3642
ORTHOMCL7420	Unigene0005182	Unigene0002613	Unigene0038162	Unigene0015683	Unigene0046875	Unigene0028032	Unigene0016727	Unigene0022875	Unigene0040028	Unigene0030921	Unigene0029355	0.00118947	0.0253368	0.0469464	0.0227	0.4814
ORTHOMCL10353	Unigene0029249	Unigene0031257	Unigene0010894	Unigene0011952	Unigene0028904	Unigene0042160	Unigene0033712	Unigene0033542	Unigene0027339	Unigene0040599	Unigene0038236	0.000368421	0.0078	0.0472335	0.0071	0.1483
ORTHOMCL9933	Unigene0023462	Unigene0022611	Unigene0025468	Unigene0007778	Unigene0034554	Unigene0039727	Unigene0033463	Unigene0042215	Unigene0033931	Unigene0019236	Unigene0009785	0.00137895	0.0291632	0.0472839	0.0262	0.5542
ORTHOMCL6994	Unigene0021235	Unigene0005489	Unigene0018680	Unigene0014636	Unigene0035424	Unigene0041265	Unigene0002218	Unigene0047326	Unigene0017805	Unigene0006979	Unigene0028829	0.000463158	0.00978947	0.0473118	0.0088	0.1859
ORTHOMCL6579	Unigene0025136	Unigene0001896	Unigene0040711	Unigene0004801	Unigene0006433	Unigene0002859	Unigene0045060	Unigene0014615	Unigene0023037	Unigene0004712	Unigene0038836	0.000563158	0.0118263	0.047619	0.0107	0.2247
ORTHOMCL8689	Unigene0040423	Unigene0033198	Unigene0008312	Unigene0005226	Unigene0047149	Unigene0013157	Unigene0022723	Unigene0004153	Unigene0010081	Unigene0024361	Unigene0029110	0.000852632	0.0178053	0.0478865	0.0163	0.3384
ORTHOMCL9564	Unigene0027862	Unigene0032338	Unigene0007733	Unigene0007776	Unigene0006288	Unigene0014732	Unigene0010251	Unigene0017303	Unigene0040397	Unigene0007863	Unigene0013883	0.00141579	0.0294632	0.0480529	0.0269	0.5599
ORTHOMCL10792	Unigene0025595	Unigene0035439	Unigene0039107	Unigene0040843	Unigene0017721	Unigene0046557	Unigene0042162	Unigene0047811	Unigene0019468	Unigene0045179	Unigene0027673	0.00150526	0.0311211	0.048368	0.0286	0.5913
ORTHOMCL7248	Unigene0037946	Unigene0041185	Unigene0029872	Unigene0002448	Unigene0024887	Unigene0042257	Unigene0043359	Unigene0022899	Unigene0037579	Unigene0046836	Unigene0026358	0.000789474	0.0161842	0.0487805	0.0151	0.3075
ORTHOMCL8787	Unigene0025558	Unigene0033664	Unigene0021927	Unigene0012396	Unigene0012700	Unigene0006936	Unigene0004338	Unigene0007133	Unigene0041727	Unigene0017229	Unigene0008234	0.00112105	0.0229053	0.048943	0.0214	0.4353
ORTHOMCL6281	Unigene0038367	Unigene0001656	Unigene0013748	Unigene0011622	Unigene0023424	Unigene0028011	Unigene0043709	Unigene0035763	Unigene0033850	Unigene0005316	Unigene0022633	0.000652632	0.0133158	0.0490119	0.0124	0.2531
ORTHOMCL8695	Unigene0006988	Unigene0039017	Unigene0005958	Unigene0007365	Unigene0041058	Unigene0040023	Unigene0038030	Unigene0042865	Unigene0019604	Unigene0016660	Unigene0004162	0.0006	0.0122316	0.0490534	0.0113	0.2326
ORTHOMCL10265	Unigene0039374	Unigene0034346	Unigene0010159	Unigene0034041	Unigene0037455	Unigene0028415	Unigene0045781	Unigene0035103	Unigene0038711	Unigene0018058	Unigene0033678	0.00137895	0.0280684	0.0491281	0.0263	0.5334
ORTHOMCL9094	Unigene0038360	Unigene0004929	Unigene0015846	Unigene0034008	Unigene0043361	Unigene0022374	Unigene0020191	Unigene0034668	Unigene0039364	Unigene0007108	Unigene0022835	0.00128421	0.0260316	0.0493328	0.0244	0.4945
ORTHOMCL6213	Unigene0004125	Unigene0039141	Unigene0002369	Unigene0038231	Unigene0039541	Unigene0015453	Unigene0001609	Unigene0047726	Unigene0035083	Unigene0022426	Unigene0023495	0.000457895	0.00925789	0.0494599	0.0086	0.1759
ORTHOMCL7688	Unigene0011283	Unigene0039011	Unigene0002884	Unigene0007771	Unigene0005055	Unigene0042176	Unigene0042806	Unigene0003835	Unigene0004897	Unigene0042419	Unigene0016163	0.000289474	0.00584737	0.049505	0.0055	0.1111
ORTHOMCL5970	Unigene0036868	Unigene0040577	Unigene0037405	Unigene0038972	Unigene0039501	Unigene0018318	Unigene0041956	Unigene0042612	Unigene0036501	Unigene0001426	Unigene0037289	0.00210526	0.0423789	0.0496771	0.04	0.805
ORTHOMCL6759	Unigene0007897	Unigene0029639	Unigene0003339	Unigene0002029	Unigene0030782	Unigene0008001	Unigene0047247	Unigene0046650	Unigene0006336	Unigene0008139	Unigene0007404	0.000263158	0.00526316	0.05	0.0051	0.1002
ORTHOMCL7316	Unigene0017901	Unigene0003882	Unigene0042119	Unigene0009199	Unigene0023225	Unigene0025525	Unigene0007877	Unigene0002524	Unigene0002623	Unigene0022322	Unigene0025472	0.000784211	0.0156211	0.0502022	0.015	0.2968
ORTHOMCL4752	Unigene0027490	Unigene0033167	Unigene0038916	Unigene0027060	Unigene0025332	Unigene0021196	Unigene0029330	Unigene0021199	Unigene0012649	Unigene0000162	Unigene0004738	0.00197368	0.0389789	0.0506346	0.0376	0.7407
ORTHOMCL5307	Unigene0005128	Unigene0015935	Unigene0021464	Unigene0029714	Unigene0032076	Unigene0012506	Unigene0029983	Unigene0000597	Unigene0020087	Unigene0021934	Unigene0014762	0.00144737	0.0282947	0.0511533	0.0277	0.5376
ORTHOMCL8497	Unigene0041751	Unigene0035477	Unigene0041941	Unigene0039906	Unigene0046627	Unigene0045228	Unigene0045583	Unigene0003850	Unigene0009528	Unigene0044509	Unigene0039533	0.000410526	0.008	0.0513158	0.0078	0.1521
ORTHOMCL8043	Unigene0026788	Unigene0035987	Unigene0004542	Unigene0010933	Unigene0003267	Unigene0018887	Unigene0012307	Unigene0031576	Unigene0009784	Unigene0018246	Unigene0020548	0.000942105	0.0183158	0.0514368	0.018	0.3481
ORTHOMCL8780	Unigene0045969	Unigene0009967	Unigene0005459	Unigene0009486	Unigene0009243	Unigene0011634	Unigene0043575	Unigene0004318	Unigene0036418	Unigene0005133	Unigene0014915	0.00136842	0.0265211	0.0515975	0.0259	0.5041
ORTHOMCL5152	Unigene0008978	Unigene0022934	Unigene0006207	Unigene0010596	Unigene0006061	Unigene0000448	Unigene0007026	Unigene0047599	Unigene0032838	Unigene0013951	Unigene0007784	0.00127895	0.0247211	0.0517352	0.0244	0.4698
ORTHOMCL10290	Unigene0038662	Unigene0022034	Unigene0010381	Unigene0036832	Unigene0033322	Unigene0017113	Unigene0046343	Unigene0017871	Unigene0036753	Unigene0014862	Unigene0020483	0.000947368	0.0182053	0.0520382	0.0179	0.346
ORTHOMCL4673	Unigene0002222	Unigene0003622	Unigene0034950	Unigene0000124	Unigene0002302	Unigene0014664	Unigene0015737	Unigene0031163	Unigene0039325	Unigene0028031	Unigene0029073	0.00114211	0.0219368	0.0520633	0.0217	0.4168
ORTHOMCL5223	Unigene0000583	Unigene0001064	Unigene0009327	Unigene0034382	Unigene0004616	Unigene0043408	Unigene0030335	Unigene0045499	Unigene0000510	Unigene0001122	Unigene0036242	0.000578947	0.0110474	0.0524059	0.011	0.21
ORTHOMCL7346	Unigene0022960	Unigene0011369	Unigene0019758	Unigene0017964	Unigene0016621	Unigene0018400	Unigene0030228	Unigene0044580	Unigene0002547	Unigene0024171	Unigene0027274	0.00205263	0.0391526	0.0524264	0.039	0.7439
ORTHOMCL10702	Unigene0037761	Unigene0040385	Unigene0015635	Unigene0028451	Unigene0032671	Unigene0027076	Unigene0029680	Unigene0025702	Unigene0022963	Unigene0029965	Unigene0030363	0.00135789	0.0258947	0.052439	0.0258	0.4919
ORTHOMCL10777	Unigene0035596	Unigene0028514	Unigene0027626	Unigene0029077	Unigene0017165	Unigene0035328	Unigene0034595	Unigene0019165	Unigene0042178	Unigene0042440	Unigene0026812	0.000421053	0.00795789	0.0529101	0.0081	0.1513
ORTHOMCL8553	Unigene0044501	Unigene0018327	Unigene0034585	Unigene0035353	Unigene0033648	Unigene0003930	Unigene0027474	Unigene0012408	Unigene0015797	Unigene0041862	Unigene0035463	0.000510526	0.00951053	0.0536801	0.0098	0.1808
ORTHOMCL10133	Unigene0040924	Unigene0040014	Unigene0008984	Unigene0034967	Unigene0046638	Unigene0043490	Unigene0043072	Unigene0044203	Unigene0034643	Unigene0023802	Unigene0036893	0.000310526	0.00576842	0.0538321	0.0059	0.1097
ORTHOMCL5172	Unigene0004975	Unigene0000672	Unigene0009051	Unigene0026053	Unigene0033864	Unigene0033137	Unigene0040098	Unigene0000464	Unigene0037336	Unigene0003158	Unigene0004252	0.000494737	0.00918421	0.0538682	0.0093	0.1746
ORTHOMCL5522	Unigene0023833	Unigene0035873	Unigene0040844	Unigene0014760	Unigene0005534	Unigene0027394	Unigene0002103	Unigene0000966	Unigene0001446	Unigene0013604	Unigene0005581	0.000715789	0.0132684	0.0539468	0.0134	0.2519
ORTHOMCL5144	Unigene0000444	Unigene0040289	Unigene0036072	Unigene0030223	Unigene0023604	Unigene0034678	Unigene0041451	Unigene0034028	Unigene0015733	Unigene0011085	Unigene0021039	0.00322105	0.0593947	0.0542313	0.0611	1.1286
ORTHOMCL4676	Unigene0005289	Unigene0038252	Unigene0039819	Unigene0004747	Unigene0042876	Unigene0045256	Unigene0000125	Unigene0023435	Unigene0034620	Unigene0022774	Unigene0018076	0.00278947	0.0512368	0.0544427	0.053	0.9737
ORTHOMCL9793	Unigene0036453	Unigene0033994	Unigene0022593	Unigene0021603	Unigene0013641	Unigene0031463	Unigene0013857	Unigene0044122	Unigene0022822	Unigene0048794	Unigene0007148	0.000447368	0.00817368	0.0547328	0.0084	0.1553
ORTHOMCL4723	Unigene0017179	Unigene0000150	Unigene0000544	Unigene0010714	Unigene0020309	Unigene0043613	Unigene0046990	Unigene0001530	Unigene0000642	Unigene0000685	Unigene0000955	0.00112105	0.0204737	0.0547558	0.0213	0.3891
ORTHOMCL5606	Unigene0008436	Unigene0029320	Unigene0003681	Unigene0024997	Unigene0001530	Unigene0043227	Unigene0006513	Unigene0033245	Unigene0028321	Unigene0038030	Unigene0001101	0.000268421	0.00489474	0.0548387	0.0052	0.0931
ORTHOMCL7837	Unigene0030724	Unigene0038090	Unigene0015211	Unigene0037111	Unigene0003041	Unigene0040437	Unigene0009162	Unigene0022744	Unigene0042137	Unigene0046652	Unigene0030977	0.00187895	0.0341789	0.0549738	0.0357	0.6495
ORTHOMCL7925	Unigene0026515	Unigene0033745	Unigene0042086	Unigene0020938	Unigene0028557	Unigene0024235	Unigene0046660	Unigene0024878	Unigene0003129	Unigene0024828	Unigene0022529	0.000373684	0.00674737	0.0553822	0.0073	0.1283
ORTHOMCL9914	Unigene0025175	Unigene0036189	Unigene0022250	Unigene0014828	Unigene0029557	Unigene0040759	Unigene0029209	Unigene0040104	Unigene0017767	Unigene0012409	Unigene0007701	0.00182105	0.0326684	0.0557435	0.0345	0.6207
ORTHOMCL6529	Unigene0039406	Unigene0037418	Unigene0043692	Unigene0008422	Unigene0041004	Unigene0040193	Unigene0047508	Unigene0011558	Unigene0001842	Unigene0025512	Unigene0011183	0.00161053	0.0287947	0.0559313	0.0304	0.5472
ORTHOMCL8385	Unigene0021298	Unigene0037969	Unigene0027795	Unigene0029251	Unigene0003686	Unigene0044484	Unigene0034683	Unigene0037046	Unigene0031305	Unigene0035200	Unigene0023473	0.000789474	0.0140526	0.0561798	0.015	0.2671
ORTHOMCL6078	Unigene0037705	Unigene0034233	Unigene0033437	Unigene0005172	Unigene0047618	Unigene0047044	Unigene0043993	Unigene0043151	Unigene0030130	Unigene0001506	Unigene0037586	0.000810526	0.0144211	0.0562044	0.0153	0.2741
ORTHOMCL6266	Unigene0014523	Unigene0028314	Unigene0003122	Unigene0035224	Unigene0014660	Unigene0001648	Unigene0003067	Unigene0011354	Unigene0034528	Unigene0031104	Unigene0008630	0.000442105	0.00784211	0.0563758	0.0083	0.149
ORTHOMCL8441	Unigene0039712	Unigene0026376	Unigene0042368	Unigene0013622	Unigene0014985	Unigene0003768	Unigene0047040	Unigene0035870	Unigene0004073	Unigene0045669	Unigene0035587	0.000531579	0.00938947	0.0566143	0.0099	0.1783
ORTHOMCL10112	Unigene0032864	Unigene0008915	Unigene0026598	Unigene0025133	Unigene0038462	Unigene0009828	Unigene0038027	Unigene0025145	Unigene0018156	Unigene0036732	Unigene0008849	0.000421053	0.00742632	0.0566974	0.008	0.1413
ORTHOMCL6974	Unigene0020236	Unigene0014643	Unigene0032803	Unigene0026482	Unigene0002199	Unigene0025659	Unigene0033730	Unigene0025677	Unigene0010891	Unigene0037186	Unigene0023928	0.000568421	0.0100211	0.0567227	0.0108	0.1906
ORTHOMCL9690	Unigene0037614	Unigene0021058	Unigene0014828	Unigene0006724	Unigene0021079	Unigene0023978	Unigene0011345	Unigene0030529	Unigene0041738	Unigene0011676	Unigene0021595	0.000947368	0.0166053	0.0570523	0.0181	0.3155
ORTHOMCL8183	Unigene0010179	Unigene0005500	Unigene0038024	Unigene0020458	Unigene0031654	Unigene0012211	Unigene0038372	Unigene0045518	Unigene0003429	Unigene0028213	Unigene0030934	0.00202105	0.0353789	0.0571259	0.0384	0.6722
ORTHOMCL10547	Unigene0025254	Unigene0034085	Unigene0013078	Unigene0017750	Unigene0021242	Unigene0039834	Unigene0026773	Unigene0039398	Unigene0031101	Unigene0027657	Unigene0017823	0.00102105	0.0177789	0.0574304	0.0194	0.3378
ORTHOMCL8501	Unigene0011196	Unigene0039951	Unigene0004831	Unigene0023593	Unigene0037271	Unigene0021593	Unigene0030634	Unigene0005071	Unigene0003855	Unigene0031117	Unigene0016246	0.000310526	0.00539474	0.057561	0.0059	0.1026
ORTHOMCL10549	Unigene0015969	Unigene0018873	Unigene0032484	Unigene0013122	Unigene0022588	Unigene0042704	Unigene0016573	Unigene0020185	Unigene0026211	Unigene0026528	Unigene0013137	0.00173684	0.0299684	0.0579557	0.0333	0.5692
ORTHOMCL6114	Unigene0032644	Unigene0021265	Unigene0001890	Unigene0016835	Unigene0043993	Unigene0001530	Unigene0028374	Unigene0025889	Unigene0018737	Unigene0003633	Unigene0005405	0.00138421	0.0237474	0.058289	0.0263	0.4513
ORTHOMCL4630	Unigene0037870	Unigene0000103	Unigene0022495	Unigene0006927	Unigene0047477	Unigene0022405	Unigene0044582	Unigene0033666	Unigene0014641	Unigene0048966	Unigene0014932	0.00236316	0.0405368	0.0582965	0.045	0.7701
ORTHOMCL6019	Unigene0045902	Unigene0037141	Unigene0001465	Unigene0024185	Unigene0036069	Unigene0033827	Unigene0026047	Unigene0040320	Unigene0012539	Unigene0042971	Unigene0016402	0.000626316	0.0107	0.0585342	0.0118	0.2034
ORTHOMCL7407	Unigene0030690	Unigene0009354	Unigene0008060	Unigene0022780	Unigene0002603	Unigene0028049	Unigene0046206	Unigene0004583	Unigene0012304	Unigene0033431	Unigene0010163	0.00178947	0.0305579	0.0585601	0.034	0.5807
ORTHOMCL6794	Unigene0040135	Unigene0016357	Unigene0019194	Unigene0002053	Unigene0026913	Unigene0017978	Unigene0037173	Unigene0035082	Unigene0037421	Unigene0007463	Unigene0003142	0.000694737	0.0118421	0.0586667	0.0133	0.2251
ORTHOMCL10820	Unigene0041142	Unigene0038893	Unigene0018284	Unigene0031350	Unigene0021564	Unigene0027293	Unigene0023572	Unigene0022645	Unigene0032915	Unigene0024855	Unigene0031601	0.00322632	0.0549158	0.0587502	0.0613	1.0432
ORTHOMCL9703	Unigene0035580	Unigene0009587	Unigene0016963	Unigene0026996	Unigene0009931	Unigene0016653	Unigene0034578	Unigene0006760	Unigene0015448	Unigene0036503	Unigene0012399	0.000557895	0.00946316	0.0589544	0.0104	0.1799
ORTHOMCL5201	Unigene0038500	Unigene0000489	Unigene0033436	Unigene0019332	Unigene0030249	Unigene0016920	Unigene0009800	Unigene0021681	Unigene0029066	Unigene0023052	Unigene0029723	0.000968421	0.0163895	0.059088	0.0182	0.3115
ORTHOMCL5801	Unigene0031464	Unigene0016160	Unigene0035128	Unigene0010990	Unigene0026472	Unigene0044411	Unigene0018017	Unigene0001283	Unigene0036481	Unigene0020118	Unigene0034404	0.00108947	0.0183421	0.0593974	0.0208	0.3485
ORTHOMCL8739	Unigene0032070	Unigene0005397	Unigene0012743	Unigene0004238	Unigene0026370	Unigene0038449	Unigene0027762	Unigene0039323	Unigene0004441	Unigene0028894	Unigene0011725	0.000373684	0.00628947	0.0594142	0.0071	0.1197
ORTHOMCL8805	Unigene0042174	Unigene0033190	Unigene0004371	Unigene0021358	Unigene0044313	Unigene0028783	Unigene0005317	Unigene0045015	Unigene0035918	Unigene0046310	Unigene0037747	0.000921053	0.0154737	0.0595238	0.0174	0.2938
ORTHOMCL7698	Unigene0032258	Unigene0028587	Unigene0022638	Unigene0009240	Unigene0011853	Unigene0002899	Unigene0047023	Unigene0011238	Unigene0023973	Unigene0019633	Unigene0017192	0.00109474	0.0182789	0.0598906	0.021	0.3473
ORTHOMCL8857	Unigene0005175	Unigene0039472	Unigene0007688	Unigene0034062	Unigene0004470	Unigene0025256	Unigene0042516	Unigene0041648	Unigene0019553	Unigene0018392	Unigene0004761	0.00131053	0.0218789	0.059899	0.0248	0.4158
ORTHOMCL6268	Unigene0007943	Unigene0036093	Unigene0015446	Unigene0014287	Unigene0001649	Unigene0003089	Unigene0027002	Unigene0027497	Unigene0008361	Unigene0049547	Unigene0012654	0.00140526	0.0234579	0.0599058	0.027	0.4457
ORTHOMCL7713	Unigene0034271	Unigene0019122	Unigene0007677	Unigene0005588	Unigene0007017	Unigene0002913	Unigene0031157	Unigene0028446	Unigene0015062	Unigene0013279	Unigene0008124	0.00104737	0.0174158	0.060139	0.0199	0.331
ORTHOMCL8218	Unigene0016127	Unigene0011727	Unigene0013946	Unigene0021994	Unigene0031429	Unigene0035341	Unigene0014928	Unigene0003476	Unigene0012601	Unigene0019195	Unigene0021796	0.000405263	0.00673684	0.0601563	0.0076	0.1281
ORTHOMCL4936	Unigene0020408	Unigene0000271	Unigene0022756	Unigene0032273	Unigene0042027	Unigene0047093	Unigene0007173	Unigene0029371	Unigene0030234	Unigene0012493	Unigene0029412	0.00135789	0.0224895	0.0603791	0.0258	0.4272
ORTHOMCL10889	Unigene0033513	Unigene0029267	Unigene0031068	Unigene0025937	Unigene0023975	Unigene0023341	Unigene0028536	Unigene0037739	Unigene0027332	Unigene0020510	Unigene0028105	0.000589474	0.00974737	0.0604752	0.0114	0.1855
ORTHOMCL9792	Unigene0036452	Unigene0033993	Unigene0022592	Unigene0017310	Unigene0013640	Unigene0020850	Unigene0012682	Unigene0044123	Unigene0011085	Unigene0048793	Unigene0007147	0.0012	0.0198158	0.0605578	0.0228	0.3764
ORTHOMCL4538	Unigene0000315	Unigene0000545	Unigene0036329	Unigene0000995	Unigene0001131	Unigene0000065	Unigene0029221	Unigene0000628	Unigene0022321	Unigene0001137	Unigene0001057	0.000694737	0.0114368	0.0607455	0.013	0.2173
ORTHOMCL10342	Unigene0045461	Unigene0041834	Unigene0026492	Unigene0032996	Unigene0011696	Unigene0010793	Unigene0037904	Unigene0045420	Unigene0030227	Unigene0042493	Unigene0025990	0.000215789	0.00354211	0.0609212	0.0042	0.0674
ORTHOMCL10359	Unigene0039547	Unigene0010947	Unigene0036544	Unigene0036523	Unigene0031843	Unigene0025173	Unigene0029636	Unigene0043446	Unigene0037223	Unigene0043912	Unigene0034808	0.00146842	0.0240579	0.061037	0.0279	0.4573
ORTHOMCL7847	Unigene0023216	Unigene0021955	Unigene0011389	Unigene0003046	Unigene0044024	Unigene0014819	Unigene0013980	Unigene0003953	Unigene0007694	Unigene0003843	Unigene0014413	0.00105263	0.0172158	0.0611434	0.0199	0.327
ORTHOMCL9949	Unigene0036425	Unigene0031626	Unigene0009103	Unigene0012345	Unigene0007911	Unigene0015329	Unigene0035788	Unigene0037187	Unigene0026535	Unigene0048943	Unigene0020216	0.000347368	0.00565789	0.0613953	0.0066	0.1077
ORTHOMCL10812	Unigene0040222	Unigene0023311	Unigene0028322	Unigene0033500	Unigene0045439	Unigene0018942	Unigene0018151	Unigene0028667	Unigene0035575	Unigene0023166	Unigene0019038	0.000778947	0.0126737	0.0614618	0.0149	0.2408
ORTHOMCL4543	Unigene0041349	Unigene0019902	Unigene0008487	Unigene0034911	Unigene0000462	Unigene0002529	Unigene0007226	Unigene0012512	Unigene0000108	Unigene0036090	Unigene0000067	0.00115263	0.0187263	0.0615514	0.022	0.3559
ORTHOMCL10219	Unigene0042491	Unigene0029954	Unigene0035800	Unigene0035347	Unigene0041981	Unigene0031356	Unigene0042682	Unigene0044241	Unigene0009766	Unigene0023893	Unigene0028653	0.00105263	0.0170842	0.0616143	0.0199	0.3247
ORTHOMCL9802	Unigene0043658	Unigene0007187	Unigene0009214	Unigene0022755	Unigene0018575	Unigene0019210	Unigene0044868	Unigene0039399	Unigene0042653	Unigene0036570	Unigene0018804	0.00340526	0.0552579	0.0616249	0.0648	1.0501
ORTHOMCL8360	Unigene0043140	Unigene0038527	Unigene0003649	Unigene0038741	Unigene0013878	Unigene0005420	Unigene0048287	Unigene0033951	Unigene0035310	Unigene0048409	Unigene0035548	0.000973684	0.0156842	0.0620805	0.0186	0.298
ORTHOMCL6148	Unigene0039651	Unigene0003317	Unigene0004504	Unigene0003109	Unigene0043417	Unigene0022304	Unigene0007434	Unigene0008234	Unigene0038782	Unigene0045348	Unigene0001552	0.000710526	0.0114316	0.0621547	0.0136	0.2173
ORTHOMCL10248	Unigene0038580	Unigene0038377	Unigene0021256	Unigene0031961	Unigene0010041	Unigene0023637	Unigene0039852	Unigene0019629	Unigene0040098	Unigene0017077	Unigene0017436	0.00196316	0.0314684	0.062385	0.0373	0.5979
ORTHOMCL5032	Unigene0000608	Unigene0011851	Unigene0033889	Unigene0019277	Unigene0006865	Unigene0004469	Unigene0021578	Unigene0000348	Unigene0029425	Unigene0044755	Unigene0029635	0.0013	0.0208158	0.0624526	0.0246	0.3955
ORTHOMCL4970	Unigene0030653	Unigene0039181	Unigene0025449	Unigene0000901	Unigene0001126	Unigene0008417	Unigene0005051	Unigene0000504	Unigene0040773	Unigene0000301	Unigene0002292	0.000678947	0.0108474	0.062591	0.0128	0.2062
ORTHOMCL10030	Unigene0023820	Unigene0035971	Unigene0035569	Unigene0026712	Unigene0026670	Unigene0029118	Unigene0008311	Unigene0030771	Unigene0019594	Unigene0026093	Unigene0030819	0.00148421	0.0236684	0.0627085	0.0281	0.4496
ORTHOMCL8634	Unigene0010155	Unigene0014125	Unigene0038971	Unigene0035568	Unigene0004044	Unigene0019096	Unigene0044585	Unigene0041358	Unigene0032020	Unigene0026875	Unigene0033082	0.00130526	0.0208105	0.0627213	0.0247	0.3954
ORTHOMCL6434	Unigene0038985	Unigene0031038	Unigene0002703	Unigene0030527	Unigene0045893	Unigene0004496	Unigene0043708	Unigene0044338	Unigene0001770	Unigene0037945	Unigene0032616	0.000531579	0.00841579	0.0631645	0.0103	0.1599
ORTHOMCL6524	Unigene0007408	Unigene0017158	Unigene0043697	Unigene0039636	Unigene0047562	Unigene0042048	Unigene0043694	Unigene0029275	Unigene0035712	Unigene0001839	Unigene0036282	0.000836842	0.0131895	0.0634477	0.0159	0.2505
ORTHOMCL7450	Unigene0037373	Unigene0006694	Unigene0008713	Unigene0024978	Unigene0012158	Unigene0042306	Unigene0007205	Unigene0038027	Unigene0041247	Unigene0014040	Unigene0002647	0.000194737	0.00306842	0.0634648	0.0038	0.0584
ORTHOMCL7657	Unigene0040313	Unigene0004417	Unigene0020364	Unigene0026485	Unigene0007909	Unigene0024015	Unigene0043017	Unigene0002853	Unigene0024143	Unigene0004803	Unigene0023930	0.00106842	0.0167895	0.0636364	0.0204	0.3191
ORTHOMCL6951	Unigene0025325	Unigene0021042	Unigene0019334	Unigene0012100	Unigene0044936	Unigene0039784	Unigene0002178	Unigene0024574	Unigene0015094	Unigene0022459	Unigene0039386	0.00112105	0.0175947	0.0637152	0.0214	0.3344
ORTHOMCL4811	Unigene0000201	Unigene0024225	Unigene0020524	Unigene0016373	Unigene0020410	Unigene0035407	Unigene0013098	Unigene0010163	Unigene0032328	Unigene0022753	Unigene0018875	0.00173684	0.0270737	0.0641524	0.033	0.5142
ORTHOMCL10922	Unigene0043592	Unigene0035371	Unigene0037196	Unigene0032840	Unigene0040445	Unigene0022355	Unigene0043813	Unigene0029087	Unigene0037737	Unigene0027534	Unigene0036676	0.000426316	0.00661579	0.0644391	0.0081	0.1257
ORTHOMCL6688	Unigene0021489	Unigene0036381	Unigene0035958	Unigene0028046	Unigene0001974	Unigene0013228	Unigene0013035	Unigene0003481	Unigene0035614	Unigene0043318	Unigene0036882	0.0023	0.0356053	0.0645972	0.0437	0.6766
ORTHOMCL9472	Unigene0014823	Unigene0038047	Unigene0030307	Unigene0030547	Unigene0038749	Unigene0033198	Unigene0034881	Unigene0017981	Unigene0036967	Unigene0008660	Unigene0005954	0.00128421	0.0198526	0.0646872	0.0244	0.3772
ORTHOMCL7065	Unigene0019985	Unigene0003412	Unigene0037802	Unigene0039619	Unigene0014351	Unigene0015526	Unigene0023771	Unigene0043724	Unigene0013013	Unigene0045412	Unigene0002276	0.00156842	0.0242316	0.0647263	0.0298	0.4604
ORTHOMCL7890	Unigene0015320	Unigene0022650	Unigene0012947	Unigene0021503	Unigene0030093	Unigene0029695	Unigene0020115	Unigene0024783	Unigene0003096	Unigene0016047	Unigene0021081	0.00117895	0.0181158	0.0650784	0.0225	0.3442
ORTHOMCL4535	Unigene0003565	Unigene0000065	Unigene0012888	Unigene0019893	Unigene0010174	Unigene0025472	Unigene0030622	Unigene0027224	Unigene0014415	Unigene0007945	Unigene0015957	0.00121579	0.0186421	0.0652174	0.0231	0.3543
ORTHOMCL7756	Unigene0018909	Unigene0011415	Unigene0002970	Unigene0032058	Unigene0040786	Unigene0027911	Unigene0048090	Unigene0031450	Unigene0021546	Unigene0017502	Unigene0021979	0.0005	0.00762632	0.0655625	0.0094	0.1447
ORTHOMCL8192	Unigene0044372	Unigene0037380	Unigene0039976	Unigene0033404	Unigene0041285	Unigene0009883	Unigene0004941	Unigene0003441	Unigene0027602	Unigene0044899	Unigene0011961	0.0022	0.0333842	0.0658994	0.0419	0.6344
ORTHOMCL8997	Unigene0036258	Unigene0038309	Unigene0012184	Unigene0011457	Unigene0015597	Unigene0012332	Unigene0016340	Unigene0004736	Unigene0005758	Unigene0010259	Unigene0023267	0.0005	0.00757895	0.0659722	0.0094	0.1441
ORTHOMCL10202	Unigene0039095	Unigene0020413	Unigene0034281	Unigene0021643	Unigene0009636	Unigene0013189	Unigene0020820	Unigene0015404	Unigene0035460	Unigene0026100	Unigene0009973	0.00204211	0.0309158	0.0660538	0.0387	0.5874
ORTHOMCL5473	Unigene0039301	Unigene0038400	Unigene0041221	Unigene0030799	Unigene0001641	Unigene0020784	Unigene0046731	Unigene0000883	Unigene0032952	Unigene0044272	Unigene0013165	0.00165263	0.0248316	0.0665536	0.0314	0.4717
ORTHOMCL10723	Unigene0015999	Unigene0019103	Unigene0036406	Unigene0032701	Unigene0026060	Unigene0016185	Unigene0026427	Unigene0029144	Unigene0034800	Unigene0034826	Unigene0028833	0.00124737	0.0187	0.0667042	0.0239	0.3553
ORTHOMCL8998	Unigene0040560	Unigene0024827	Unigene0037092	Unigene0032768	Unigene0047737	Unigene0004736	Unigene0043142	Unigene0042635	Unigene0033684	Unigene0031077	Unigene0031488	0.00224737	0.0336684	0.06675	0.0427	0.6399
ORTHOMCL4866	Unigene0001523	Unigene0000230	Unigene0017947	Unigene0031288	Unigene0000411	Unigene0041358	Unigene0000936	Unigene0038551	Unigene0000591	Unigene0000334	Unigene0001033	0.00205263	0.0307	0.066861	0.0391	0.5832
ORTHOMCL10304	Unigene0022058	Unigene0023127	Unigene0018364	Unigene0017123	Unigene0010494	Unigene0013460	Unigene0021117	Unigene0019321	Unigene0034282	Unigene0014297	Unigene0011226	0.00165789	0.0246842	0.0671642	0.0315	0.4691
ORTHOMCL5326	Unigene0000631	Unigene0012561	Unigene0041748	Unigene0037070	Unigene0007168	Unigene0021025	Unigene0044482	Unigene0006283	Unigene0035173	Unigene0048334	Unigene0039700	0.0228105	0.339126	0.0672626	0.4332	6.4434
ORTHOMCL10563	Unigene0034419	Unigene0028316	Unigene0028066	Unigene0025178	Unigene0036672	Unigene0037760	Unigene0034856	Unigene0013309	Unigene0027827	Unigene0035556	Unigene0023808	0.000384211	0.00570526	0.0673432	0.0073	0.1085
ORTHOMCL9557	Unigene0022097	Unigene0011784	Unigene0016197	Unigene0020069	Unigene0047589	Unigene0006273	Unigene0040669	Unigene0046542	Unigene0009827	Unigene0024080	Unigene0033418	0.00124737	0.0185053	0.0674061	0.0236	0.3515
ORTHOMCL5180	Unigene0045872	Unigene0039837	Unigene0020466	Unigene0004874	Unigene0013568	Unigene0016360	Unigene0023383	Unigene0000472	Unigene0002879	Unigene0016676	Unigene0016555	0.00138947	0.0204684	0.0678838	0.0264	0.389
ORTHOMCL9672	Unigene0018873	Unigene0015061	Unigene0019402	Unigene0010513	Unigene0041519	Unigene0044049	Unigene0019443	Unigene0026675	Unigene0006656	Unigene0045186	Unigene0034143	0.00154211	0.0226105	0.068203	0.0293	0.4295
ORTHOMCL5584	Unigene0039952	Unigene0025981	Unigene0033966	Unigene0010623	Unigene0031426	Unigene0039720	Unigene0047978	Unigene0041603	Unigene0041319	Unigene0001077	Unigene0029571	0.00215263	0.0315158	0.0683033	0.0408	0.5986
ORTHOMCL8852	Unigene0028508	Unigene0033417	Unigene0035231	Unigene0018643	Unigene0026347	Unigene0014542	Unigene0013689	Unigene0008380	Unigene0016420	Unigene0031525	Unigene0004466	0.00325263	0.0472526	0.0688349	0.0619	0.8979
ORTHOMCL4461	Unigene0041426	Unigene0000040	Unigene0035066	Unigene0032245	Unigene0018969	Unigene0022166	Unigene0025692	Unigene0041249	Unigene0026268	Unigene0005971	Unigene0034451	0.0007	0.0101526	0.0689476	0.0133	0.1929
ORTHOMCL4708	Unigene0000441	Unigene0032878	Unigene0021241	Unigene0020919	Unigene0000140	Unigene0044917	Unigene0000692	Unigene0001532	Unigene0001494	Unigene0001141	Unigene0009799	0.00197895	0.0284632	0.0695266	0.0376	0.5407
ORTHOMCL10282	Unigene0010290	Unigene0039521	Unigene0043694	Unigene0015038	Unigene0024175	Unigene0041577	Unigene0019875	Unigene0026685	Unigene0035013	Unigene0023535	Unigene0015412	0.000852632	0.0122211	0.0697674	0.0163	0.2322
ORTHOMCL10220	Unigene0009772	Unigene0030818	Unigene0040302	Unigene0036155	Unigene0028466	Unigene0038224	Unigene0042086	Unigene0045785	Unigene0032721	Unigene0030102	Unigene0032507	0.0005	0.00716316	0.0698016	0.0095	0.1361
ORTHOMCL10396	Unigene0032760	Unigene0013506	Unigene0029961	Unigene0025985	Unigene0033817	Unigene0044424	Unigene0025487	Unigene0011378	Unigene0031112	Unigene0015740	Unigene0024694	0.0007	0.00999474	0.0700369	0.013	0.19
ORTHOMCL8454	Unigene0020313	Unigene0003924	Unigene0006146	Unigene0016868	Unigene0042324	Unigene0006288	Unigene0042002	Unigene0038530	Unigene0003785	Unigene0011518	Unigene0036879	0.00117895	0.0168105	0.0701315	0.0224	0.3194
ORTHOMCL8393	Unigene0018991	Unigene0007681	Unigene0017105	Unigene0016138	Unigene0044897	Unigene0045103	Unigene0003693	Unigene0027891	Unigene0041276	Unigene0019353	Unigene0022360	0.000442105	0.00627368	0.0704698	0.0083	0.1192
ORTHOMCL4645	Unigene0001436	Unigene0011857	Unigene0000176	Unigene0000439	Unigene0001316	Unigene0000503	Unigene0000428	Unigene0007413	Unigene0006343	Unigene0000109	Unigene0007836	0.00315789	0.0446316	0.0707547	0.06	0.848
ORTHOMCL7862	Unigene0032867	Unigene0022372	Unigene0033688	Unigene0038580	Unigene0025114	Unigene0025882	Unigene0041839	Unigene0010624	Unigene0021622	Unigene0003061	Unigene0030314	0.000421053	0.00594737	0.0707965	0.0082	0.1131
ORTHOMCL5124	Unigene0000429	Unigene0027650	Unigene0002706	Unigene0003804	Unigene0004230	Unigene0040738	Unigene0028077	Unigene0037979	Unigene0036704	Unigene0008939	Unigene0004603	0.00101579	0.0143316	0.0708777	0.0193	0.2722
ORTHOMCL8404	Unigene0013127	Unigene0038102	Unigene0043558	Unigene0019283	Unigene0025379	Unigene0009320	Unigene0027892	Unigene0009682	Unigene0003706	Unigene0010178	Unigene0039974	0.00150526	0.0211368	0.0712151	0.0285	0.4015
ORTHOMCL4424	Unigene0044342	Unigene0000229	Unigene0003076	Unigene0000023	Unigene0000320	Unigene0040696	Unigene0000895	Unigene0007019	Unigene0010193	Unigene0048673	Unigene0000984	0.00118947	0.0166947	0.0712484	0.0225	0.3174
ORTHOMCL9875	Unigene0028355	Unigene0033033	Unigene0021753	Unigene0026588	Unigene0024342	Unigene0024850	Unigene0017702	Unigene0019654	Unigene0022211	Unigene0007531	Unigene0024994	0.000642105	0.00896316	0.0716383	0.0125	0.1701
ORTHOMCL9214	Unigene0015482	Unigene0014645	Unigene0005186	Unigene0033031	Unigene0011694	Unigene0035277	Unigene0007900	Unigene0046722	Unigene0029216	Unigene0048315	Unigene0028094	0.000584211	0.00815263	0.0716591	0.0109	0.1548
ORTHOMCL5750	Unigene0008312	Unigene0034491	Unigene0037224	Unigene0033542	Unigene0011668	Unigene0004912	Unigene0020043	Unigene0043738	Unigene0033385	Unigene0024974	Unigene0001244	0.00193158	0.0268053	0.0720597	0.0368	0.5095
ORTHOMCL5043	Unigene0033901	Unigene0000471	Unigene0036163	Unigene0037638	Unigene0003723	Unigene0004790	Unigene0004986	Unigene0029402	Unigene0008838	Unigene0000355	Unigene0034658	0.00223684	0.0310105	0.0721317	0.0423	0.5889
ORTHOMCL10657	Unigene0045507	Unigene0030077	Unigene0022792	Unigene0024938	Unigene0020421	Unigene0028714	Unigene0028576	Unigene0027751	Unigene0014738	Unigene0015739	Unigene0020412	0.000347368	0.00480526	0.0722892	0.0065	0.0912
ORTHOMCL7872	Unigene0040874	Unigene0040710	Unigene0027702	Unigene0003067	Unigene0007485	Unigene0016357	Unigene0040094	Unigene0043158	Unigene0032325	Unigene0049217	Unigene0039856	0.00102105	0.0141105	0.0723611	0.0194	0.2682
ORTHOMCL9671	Unigene0021183	Unigene0027779	Unigene0016378	Unigene0009401	Unigene0025850	Unigene0044371	Unigene0006646	Unigene0031165	Unigene0008650	Unigene0007225	Unigene0014522	0.000857895	0.0118421	0.0724444	0.0163	0.225
ORTHOMCL6189	Unigene0027944	Unigene0021115	Unigene0013089	Unigene0033280	Unigene0001589	Unigene0016947	Unigene0021234	Unigene0046098	Unigene0040590	Unigene0004897	Unigene0034132	0.00106316	0.0146632	0.0725054	0.0203	0.2787
ORTHOMCL7324	Unigene0032714	Unigene0022125	Unigene0038137	Unigene0035407	Unigene0020674	Unigene0002530	Unigene0017447	Unigene0010128	Unigene0019141	Unigene0020467	Unigene0016395	0.00166842	0.0228895	0.0728903	0.0315	0.4348
ORTHOMCL9993	Unigene0036635	Unigene0008131	Unigene0015069	Unigene0035722	Unigene0013487	Unigene0028376	Unigene0017575	Unigene0034848	Unigene0033522	Unigene0016314	Unigene0033978	0.000684211	0.00937895	0.0729517	0.0129	0.1782
ORTHOMCL9746	Unigene0008547	Unigene0018447	Unigene0012900	Unigene0012002	Unigene0011628	Unigene0006932	Unigene0007526	Unigene0011905	Unigene0008276	Unigene0020462	Unigene0017613	0.00180526	0.0247263	0.0730098	0.0341	0.4699
ORTHOMCL6818	Unigene0016519	Unigene0006910	Unigene0004048	Unigene0021830	Unigene0002071	Unigene0029084	Unigene0028422	Unigene0021164	Unigene0005713	Unigene0020638	Unigene0014084	0.00174211	0.0238421	0.0730684	0.0329	0.4531
ORTHOMCL9768	Unigene0007051	Unigene0015142	Unigene0025967	Unigene0039621	Unigene0026749	Unigene0032486	Unigene0009776	Unigene0034957	Unigene0016720	Unigene0049053	Unigene0007452	0.000363158	0.00494737	0.0734043	0.0068	0.0939
ORTHOMCL9312	Unigene0029859	Unigene0005477	Unigene0022628	Unigene0019654	Unigene0013383	Unigene0017643	Unigene0013206	Unigene0007999	Unigene0012010	Unigene0018471	Unigene0016451	0.000726316	0.00986842	0.0736	0.014	0.1876
ORTHOMCL10839	Unigene0019235	Unigene0030978	Unigene0028817	Unigene0028148	Unigene0034779	Unigene0039619	Unigene0028029	Unigene0032069	Unigene0018911	Unigene0045068	Unigene0030262	0.000521053	0.00706316	0.0737705	0.0099	0.1343
ORTHOMCL10001	Unigene0037852	Unigene0018480	Unigene0038725	Unigene0020512	Unigene0009242	Unigene0043682	Unigene0025460	Unigene0008166	Unigene0033253	Unigene0033237	Unigene0033748	0.00418947	0.0566421	0.0739639	0.0797	1.0763
ORTHOMCL10927	Unigene0043479	Unigene0022664	Unigene0031323	Unigene0030309	Unigene0042333	Unigene0040071	Unigene0041280	Unigene0037060	Unigene0026574	Unigene0029039	Unigene0024893	0.000557895	0.00753158	0.0740741	0.0106	0.1433
ORTHOMCL4604	Unigene0001797	Unigene0000194	Unigene0000583	Unigene0000868	Unigene0000164	Unigene0044782	Unigene0000941	Unigene0001657	Unigene0000092	Unigene0000651	Unigene0001045	0.00122105	0.0164474	0.07424	0.0232	0.3127
ORTHOMCL7193	Unigene0041555	Unigene0037349	Unigene0002400	Unigene0031994	Unigene0041522	Unigene0025013	Unigene0024412	Unigene0021988	Unigene0002643	Unigene0040244	Unigene0029536	0.00237895	0.0320053	0.0743299	0.045	0.6081
ORTHOMCL10876	Unigene0019950	Unigene0033647	Unigene0030685	Unigene0032659	Unigene0023346	Unigene0031457	Unigene0024995	Unigene0031130	Unigene0033755	Unigene0034533	Unigene0029202	0.00123684	0.0165737	0.0746269	0.0235	0.3149
ORTHOMCL8409	Unigene0008979	Unigene0017675	Unigene0007404	Unigene0019838	Unigene0018673	Unigene0007733	Unigene0014992	Unigene0045887	Unigene0003924	Unigene0003715	Unigene0017998	0.000447368	0.00597368	0.0748899	0.0083	0.1137
ORTHOMCL9478	Unigene0040958	Unigene0021904	Unigene0040055	Unigene0032000	Unigene0041848	Unigene0044050	Unigene0025867	Unigene0005967	Unigene0034219	Unigene0041491	Unigene0033108	0.000642105	0.00855789	0.0750308	0.0121	0.1628
ORTHOMCL7110	Unigene0019378	Unigene0033947	Unigene0035284	Unigene0015912	Unigene0002329	Unigene0038036	Unigene0029627	Unigene0011068	Unigene0019002	Unigene0003467	Unigene0023659	0.00119474	0.0159105	0.075091	0.0228	0.3024
ORTHOMCL9711	Unigene0033277	Unigene0042029	Unigene0037328	Unigene0039907	Unigene0044689	Unigene0041895	Unigene0047355	Unigene0026586	Unigene0006808	Unigene0044640	Unigene0036150	0.0005	0.00665789	0.0750988	0.0094	0.1265
ORTHOMCL10708	Unigene0025457	Unigene0037000	Unigene0015748	Unigene0030671	Unigene0023540	Unigene0034494	Unigene0018107	Unigene0022886	Unigene0016999	Unigene0019808	Unigene0016566	0.00157368	0.0209263	0.0752012	0.0299	0.3976
ORTHOMCL7355	Unigene0005440	Unigene0032915	Unigene0010197	Unigene0002557	Unigene0029917	Unigene0002800	Unigene0016495	Unigene0043998	Unigene0013032	Unigene0046085	Unigene0013865	0.000489474	0.00650526	0.0752427	0.0094	0.1236
ORTHOMCL10633	Unigene0034129	Unigene0018207	Unigene0014381	Unigene0036130	Unigene0042814	Unigene0026360	Unigene0041493	Unigene0041090	Unigene0038374	Unigene0028160	Unigene0034017	0.00203158	0.0269895	0.075273	0.0388	0.5128
ORTHOMCL10073	Unigene0043470	Unigene0017719	Unigene0035165	Unigene0022152	Unigene0008562	Unigene0044001	Unigene0033520	Unigene0043816	Unigene0014131	Unigene0029464	Unigene0031391	0.000536842	0.0071	0.0756116	0.0102	0.1349
ORTHOMCL10523	Unigene0012745	Unigene0032752	Unigene0037123	Unigene0020138	Unigene0040530	Unigene0025509	Unigene0028062	Unigene0040649	Unigene0034090	Unigene0025995	Unigene0029468	0.00231579	0.0305842	0.0757185	0.044	0.5812
ORTHOMCL4996	Unigene0001267	Unigene0000317	Unigene0021575	Unigene0012463	Unigene0045100	Unigene0026509	Unigene0027661	Unigene0043408	Unigene0036605	Unigene0029555	Unigene0026949	0.00100526	0.0132737	0.0757335	0.0192	0.2523
ORTHOMCL10651	Unigene0043189	Unigene0020893	Unigene0035850	Unigene0035016	Unigene0027851	Unigene0039843	Unigene0042611	Unigene0043297	Unigene0014688	Unigene0042010	Unigene0029728	0.000515789	0.0068	0.0758514	0.0099	0.1293
ORTHOMCL10246	Unigene0010031	Unigene0026701	Unigene0029908	Unigene0027015	Unigene0027059	Unigene0034106	Unigene0031163	Unigene0025775	Unigene0029236	Unigene0026282	Unigene0024607	0.000536842	0.00702632	0.0764045	0.0101	0.1334
ORTHOMCL4902	Unigene0024428	Unigene0039072	Unigene0036999	Unigene0031924	Unigene0042128	Unigene0000250	Unigene0029781	Unigene0001013	Unigene0035878	Unigene0024534	Unigene0008751	0.00348421	0.0455789	0.0764434	0.0663	0.8659
ORTHOMCL4666	Unigene0023617	Unigene0039514	Unigene0033330	Unigene0004843	Unigene0032003	Unigene0019094	Unigene0038430	Unigene0027887	Unigene0000306	Unigene0000121	Unigene0032110	0.00131053	0.0170579	0.0768281	0.025	0.324
ORTHOMCL7757	Unigene0019382	Unigene0036286	Unigene0042558	Unigene0032085	Unigene0027785	Unigene0046671	Unigene0012194	Unigene0024744	Unigene0026105	Unigene0002972	Unigene0030014	0.00346842	0.0450579	0.076977	0.066	0.8562
ORTHOMCL8390	Unigene0043201	Unigene0013839	Unigene0030265	Unigene0035512	Unigene0033240	Unigene0041562	Unigene0029544	Unigene0029621	Unigene0011900	Unigene0003689	Unigene0038798	0.000605263	0.00780526	0.0775455	0.0115	0.1484
ORTHOMCL10613	Unigene0039628	Unigene0018548	Unigene0034500	Unigene0019288	Unigene0024664	Unigene0045488	Unigene0014212	Unigene0043608	Unigene0014074	Unigene0014527	Unigene0026052	0.00193158	0.0248895	0.0776063	0.0367	0.4728
ORTHOMCL9400	Unigene0037051	Unigene0020929	Unigene0021824	Unigene0033818	Unigene0045416	Unigene0043641	Unigene0031204	Unigene0005716	Unigene0035991	Unigene0035454	Unigene0028930	0.00105263	0.0135579	0.0776398	0.02	0.2577
ORTHOMCL5938	Unigene0017383	Unigene0029281	Unigene0013448	Unigene0006968	Unigene0002712	Unigene0005746	Unigene0001404	Unigene0034858	Unigene0012743	Unigene0014494	Unigene0024835	0.000357895	0.00459474	0.0778923	0.0067	0.0873
ORTHOMCL10098	Unigene0035704	Unigene0035958	Unigene0041389	Unigene0036014	Unigene0023204	Unigene0026479	Unigene0042438	Unigene0031459	Unigene0033093	Unigene0008738	Unigene0030004	0.00255263	0.0327684	0.0778991	0.0485	0.6226
ORTHOMCL5833	Unigene0005061	Unigene0018717	Unigene0041478	Unigene0011648	Unigene0042682	Unigene0041658	Unigene0044096	Unigene0003372	Unigene0017427	Unigene0017326	Unigene0001326	0.00123158	0.0157789	0.078052	0.0236	0.2999
ORTHOMCL6224	Unigene0035821	Unigene0015000	Unigene0001620	Unigene0007143	Unigene0046781	Unigene0014130	Unigene0025881	Unigene0031315	Unigene0037539	Unigene0014243	Unigene0010403	0.000726316	0.00930526	0.0780543	0.0138	0.1768
ORTHOMCL9359	Unigene0015424	Unigene0019215	Unigene0039109	Unigene0026241	Unigene0037728	Unigene0034645	Unigene0021613	Unigene0027783	Unigene0013624	Unigene0005619	Unigene0015114	0.000721053	0.00922632	0.0781517	0.0136	0.1753
ORTHOMCL9734	Unigene0038602	Unigene0006881	Unigene0007019	Unigene0035184	Unigene0039445	Unigene0040734	Unigene0041207	Unigene0013954	Unigene0038538	Unigene0009550	Unigene0018837	0.000542105	0.00690526	0.0785061	0.0103	0.1311
ORTHOMCL9493	Unigene0037175	Unigene0010861	Unigene0037527	Unigene0017617	Unigene0044131	Unigene0006033	Unigene0040345	Unigene0044688	Unigene0016809	Unigene0043970	Unigene0008204	0.000773684	0.00983158	0.0786938	0.0148	0.1869
ORTHOMCL8870	Unigene0023019	Unigene0020438	Unigene0041178	Unigene0006637	Unigene0012374	Unigene0044349	Unigene0047653	Unigene0021329	Unigene0024751	Unigene0004493	Unigene0019491	0.000610526	0.00774737	0.0788043	0.0115	0.1474
ORTHOMCL7569	Unigene0003001	Unigene0014358	Unigene0026343	Unigene0002755	Unigene0030536	Unigene0006628	Unigene0047315	Unigene0019889	Unigene0032903	Unigene0005763	Unigene0031352	0.0018	0.0228263	0.0788564	0.0342	0.4338
ORTHOMCL8311	Unigene0003961	Unigene0003584	Unigene0028596	Unigene0034742	Unigene0041763	Unigene0028634	Unigene0029919	Unigene0017918	Unigene0040400	Unigene0032370	Unigene0030412	0.00116316	0.0147368	0.0789286	0.0221	0.2799
ORTHOMCL9099	Unigene0028378	Unigene0037976	Unigene0026475	Unigene0016443	Unigene0004945	Unigene0009945	Unigene0029414	Unigene0019069	Unigene0040999	Unigene0007768	Unigene0023673	0.000415789	0.00525789	0.0790791	0.0078	0.1
ORTHOMCL9565	Unigene0017953	Unigene0024809	Unigene0033580	Unigene0017177	Unigene0016093	Unigene0009160	Unigene0022097	Unigene0006291	Unigene0042527	Unigene0020944	Unigene0018185	0.00194737	0.0246105	0.0791275	0.0369	0.4677
ORTHOMCL5044	Unigene0045716	Unigene0033910	Unigene0026132	Unigene0015593	Unigene0015535	Unigene0020252	Unigene0027854	Unigene0000355	Unigene0034532	Unigene0001421	Unigene0010952	0.00341579	0.0431421	0.0791753	0.0646	0.8199
ORTHOMCL7891	Unigene0015197	Unigene0034831	Unigene0006651	Unigene0034514	Unigene0014785	Unigene0043572	Unigene0043361	Unigene0010098	Unigene0003097	Unigene0048097	Unigene0033874	0.00194737	0.0245842	0.0792122	0.037	0.4671
ORTHOMCL10729	Unigene0039731	Unigene0029144	Unigene0017648	Unigene0023386	Unigene0042146	Unigene0020019	Unigene0024608	Unigene0024285	Unigene0023283	Unigene0016088	Unigene0026653	0.00310526	0.0391947	0.0792265	0.059	0.7449
ORTHOMCL7017	Unigene0036236	Unigene0018701	Unigene0018671	Unigene0013298	Unigene0038350	Unigene0002239	Unigene0037922	Unigene0017735	Unigene0020980	Unigene0036608	Unigene0024742	0.000384211	0.0048	0.0800439	0.0073	0.0913
ORTHOMCL5653	Unigene0004270	Unigene0018382	Unigene0028998	Unigene0036750	Unigene0041357	Unigene0043734	Unigene0012702	Unigene0010820	Unigene0035429	Unigene0030732	Unigene0001146	0.000715789	0.00888947	0.080521	0.0138	0.1689
ORTHOMCL10538	Unigene0018143	Unigene0023347	Unigene0038046	Unigene0026275	Unigene0012950	Unigene0040100	Unigene0019673	Unigene0043025	Unigene0034064	Unigene0020448	Unigene0029136	0.00128947	0.0159895	0.0806452	0.0245	0.3039
ORTHOMCL6363	Unigene0027212	Unigene0021842	Unigene0037858	Unigene0001722	Unigene0004205	Unigene0011393	Unigene0006935	Unigene0004820	Unigene0020948	Unigene0014052	Unigene0004689	0.00175789	0.0217947	0.0806568	0.0334	0.414
ORTHOMCL10819	Unigene0039395	Unigene0023089	Unigene0035117	Unigene0031489	Unigene0041437	Unigene0034548	Unigene0046328	Unigene0046413	Unigene0018242	Unigene0044461	Unigene0033002	0.000836842	0.0103579	0.0807927	0.016	0.1969
ORTHOMCL7490	Unigene0035663	Unigene0020989	Unigene0037639	Unigene0036617	Unigene0004055	Unigene0043896	Unigene0045909	Unigene0002688	Unigene0008836	Unigene0046982	Unigene0036820	0.000447368	0.00553158	0.0808754	0.0085	0.1053
ORTHOMCL9606	Unigene0006405	Unigene0026056	Unigene0014190	Unigene0030238	Unigene0026378	Unigene0042015	Unigene0023327	Unigene0022167	Unigene0009549	Unigene0048604	Unigene0016974	0.000352632	0.00435789	0.0809179	0.0066	0.0828
ORTHOMCL9292	Unigene0025815	Unigene0020170	Unigene0036729	Unigene0014792	Unigene0005391	Unigene0018335	Unigene0013213	Unigene0013770	Unigene0021509	Unigene0018553	Unigene0028540	0.00178421	0.0220421	0.0809456	0.0339	0.4191
ORTHOMCL8733	Unigene0021113	Unigene0026144	Unigene0025824	Unigene0014877	Unigene0007565	Unigene0032061	Unigene0019723	Unigene0015624	Unigene0004229	Unigene0023884	Unigene0029253	0.00118947	0.0146947	0.0809456	0.0226	0.2793
ORTHOMCL7087	Unigene0035976	Unigene0002302	Unigene0032074	Unigene0031368	Unigene0025289	Unigene0042674	Unigene0015899	Unigene0030586	Unigene0020428	Unigene0022712	Unigene0039639	0.00168421	0.0208053	0.0809512	0.0321	0.3954
ORTHOMCL9228	Unigene0036730	Unigene0025040	Unigene0011421	Unigene0005469	Unigene0043096	Unigene0042497	Unigene0042539	Unigene0005221	Unigene0013148	Unigene0018035	Unigene0021914	0.000563158	0.00694211	0.0811221	0.0107	0.1319
ORTHOMCL7828	Unigene0006553	Unigene0038886	Unigene0042223	Unigene0037408	Unigene0012068	Unigene0025743	Unigene0010357	Unigene0016352	Unigene0019730	Unigene0044649	Unigene0003035	0.000589474	0.00724737	0.0813362	0.0113	0.1377
ORTHOMCL9141	Unigene0040582	Unigene0014407	Unigene0011669	Unigene0015302	Unigene0045830	Unigene0040402	Unigene0037673	Unigene0044660	Unigene0005025	Unigene0035178	Unigene0033250	0.00229474	0.0281211	0.0816021	0.0436	0.5344
ORTHOMCL6113	Unigene0037144	Unigene0039649	Unigene0035541	Unigene0033173	Unigene0023532	Unigene0027334	Unigene0025769	Unigene0046826	Unigene0001529	Unigene0030902	Unigene0023317	0.000673684	0.00822632	0.0818938	0.0128	0.1563
ORTHOMCL8709	Unigene0020258	Unigene0004194	Unigene0015075	Unigene0009120	Unigene0041393	Unigene0007145	Unigene0010120	Unigene0026534	Unigene0036319	Unigene0017462	Unigene0026267	0.00137368	0.0167421	0.0820497	0.0261	0.3182
ORTHOMCL7391	Unigene0041790	Unigene0033873	Unigene0035222	Unigene0002587	Unigene0008027	Unigene0031903	Unigene0022900	Unigene0004291	Unigene0038444	Unigene0013670	Unigene0031637	0.000584211	0.00711579	0.0821006	0.011	0.1352
ORTHOMCL4999	Unigene0043826	Unigene0041728	Unigene0002895	Unigene0004752	Unigene0006750	Unigene0008903	Unigene0007071	Unigene0000319	Unigene0038136	Unigene0010861	Unigene0001041	0.00146316	0.0178211	0.0821028	0.0278	0.3387
ORTHOMCL10930	Unigene0033547	Unigene0025670	Unigene0031187	Unigene0029164	Unigene0037385	Unigene0029164	Unigene0035571	Unigene0023011	Unigene0023241	Unigene0039468	Unigene0033387	0.000589474	0.00716316	0.0822924	0.0113	0.1362
ORTHOMCL4779	Unigene0001515	Unigene0000904	Unigene0000253	Unigene0000365	Unigene0001156	Unigene0000535	Unigene0000724	Unigene0001122	Unigene0000380	Unigene0000624	Unigene0000176	0.0014	0.0169789	0.0824551	0.0264	0.3227
ORTHOMCL5784	Unigene0037548	Unigene0031835	Unigene0001270	Unigene0031687	Unigene0046797	Unigene0041101	Unigene0041403	Unigene0010023	Unigene0032405	Unigene0019261	Unigene0031953	0.00227368	0.0275684	0.0824742	0.0431	0.5235
ORTHOMCL5478	Unigene0039486	Unigene0000887	Unigene0031036	Unigene0035365	Unigene0028899	Unigene0012337	Unigene0029181	Unigene0006016	Unigene0014101	Unigene0024621	Unigene0023008	0.00182632	0.0221	0.0826387	0.0348	0.4198
ORTHOMCL6961	Unigene0002652	Unigene0002188	Unigene0042506	Unigene0039310	Unigene0002938	Unigene0044070	Unigene0011733	Unigene0002719	Unigene0006420	Unigene0048332	Unigene0002780	0.000589474	0.00712105	0.082779	0.0112	0.1355
ORTHOMCL4818	Unigene0046141	Unigene0023934	Unigene0033435	Unigene0033739	Unigene0000205	Unigene0000496	Unigene0027852	Unigene0009249	Unigene0034273	Unigene0043928	Unigene0023792	0.00219474	0.0265053	0.0828038	0.0419	0.5035
ORTHOMCL10431	Unigene0025115	Unigene0013576	Unigene0042852	Unigene0013343	Unigene0015686	Unigene0042291	Unigene0042887	Unigene0016944	Unigene0034296	Unigene0041054	Unigene0011793	0.00221579	0.0267105	0.0829557	0.0423	0.5075
ORTHOMCL8859	Unigene0045126	Unigene0033589	Unigene0004472	Unigene0029956	Unigene0046594	Unigene0041874	Unigene0034378	Unigene0047185	Unigene0007288	Unigene0021570	Unigene0034183	0.000773684	0.00932105	0.083004	0.0145	0.1772
ORTHOMCL5024	Unigene0007520	Unigene0039887	Unigene0001371	Unigene0005708	Unigene0000341	Unigene0028790	Unigene0045761	Unigene0005584	Unigene0037047	Unigene0002739	Unigene0033806	0.00101579	0.0122316	0.0830465	0.0194	0.2325
ORTHOMCL6725	Unigene0023176	Unigene0033073	Unigene0005631	Unigene0037982	Unigene0016353	Unigene0041362	Unigene0002005	Unigene0043238	Unigene0041598	Unigene0005516	Unigene0012343	0.000589474	0.00709474	0.0830861	0.0112	0.1347
ORTHOMCL10110	Unigene0041114	Unigene0033624	Unigene0038433	Unigene0032029	Unigene0033542	Unigene0040118	Unigene0008837	Unigene0024872	Unigene0039234	Unigene0031632	Unigene0032051	0.000552632	0.00664737	0.0831354	0.0104	0.1263
ORTHOMCL9323	Unigene0012757	Unigene0005515	Unigene0025014	Unigene0039458	Unigene0041268	Unigene0038488	Unigene0017280	Unigene0042431	Unigene0034487	Unigene0008456	Unigene0018458	0.00407895	0.0490579	0.0831456	0.0774	0.9323
ORTHOMCL5508	Unigene0043581	Unigene0025235	Unigene0000944	Unigene0039220	Unigene0002409	Unigene0016215	Unigene0026371	Unigene0031656	Unigene0017712	Unigene0025795	Unigene0010933	0.00283684	0.0341053	0.083179	0.054	0.6479
ORTHOMCL8923	Unigene0039855	Unigene0034102	Unigene0004572	Unigene0020136	Unigene0043706	Unigene0042503	Unigene0037139	Unigene0026806	Unigene0038294	Unigene0030589	Unigene0022440	0.000447368	0.00535263	0.0835792	0.0085	0.1018
ORTHOMCL7339	Unigene0037359	Unigene0041815	Unigene0028753	Unigene0008173	Unigene0012063	Unigene0040203	Unigene0028615	Unigene0007559	Unigene0008843	Unigene0002540	Unigene0035520	0.000431579	0.00515789	0.0836735	0.0082	0.0979
ORTHOMCL6202	Unigene0001600	Unigene0033553	Unigene0013533	Unigene0009932	Unigene0043159	Unigene0010424	Unigene0045998	Unigene0030150	Unigene0021772	Unigene0030057	Unigene0005107	0.00188421	0.0225105	0.0837035	0.0359	0.4277
ORTHOMCL10370	Unigene0022066	Unigene0014346	Unigene0018662	Unigene0033695	Unigene0011059	Unigene0042329	Unigene0044875	Unigene0025129	Unigene0034178	Unigene0043996	Unigene0020193	0.0019	0.0226789	0.0837781	0.0362	0.4309
ORTHOMCL5480	Unigene0038996	Unigene0033281	Unigene0037101	Unigene0033116	Unigene0000951	Unigene0000892	Unigene0019608	Unigene0044678	Unigene0023265	Unigene0046016	Unigene0024948	0.00168421	0.0200737	0.0839014	0.0319	0.3814
ORTHOMCL6609	Unigene0001919	Unigene0033756	Unigene0030886	Unigene0033440	Unigene0039643	Unigene0039821	Unigene0045351	Unigene0042052	Unigene0014221	Unigene0044956	Unigene0037350	0.000515789	0.00614737	0.0839041	0.0099	0.1168
ORTHOMCL7566	Unigene0029198	Unigene0024481	Unigene0010389	Unigene0021332	Unigene0024882	Unigene0027185	Unigene0008211	Unigene0028745	Unigene0020916	Unigene0002754	Unigene0014375	0.00116842	0.0138947	0.0840909	0.0221	0.2641
ORTHOMCL10999	Unigene0040766	Unigene0036233	Unigene0039961	Unigene0036656	Unigene0040783	Unigene0042810	Unigene0047406	Unigene0033280	Unigene0032467	Unigene0039074	Unigene0035873	0.0017	0.0202158	0.0840927	0.0323	0.3841
ORTHOMCL9209	Unigene0005178	Unigene0005608	Unigene0007073	Unigene0025883	Unigene0025428	Unigene0019274	Unigene0040035	Unigene0031658	Unigene0008491	Unigene0028439	Unigene0020170	0.0015	0.0178053	0.0842448	0.0284	0.3383
ORTHOMCL5533	Unigene0002001	Unigene0041178	Unigene0009495	Unigene0000999	Unigene0023115	Unigene0015454	Unigene0040189	Unigene0007091	Unigene0003509	Unigene0030059	Unigene0010934	0.00104737	0.0123842	0.0845729	0.02	0.2351
ORTHOMCL10320	Unigene0022541	Unigene0028475	Unigene0012511	Unigene0034599	Unigene0012626	Unigene0021686	Unigene0010658	Unigene0034728	Unigene0037364	Unigene0021521	Unigene0031770	0.00342105	0.0404105	0.0846575	0.0649	0.7677
ORTHOMCL6651	Unigene0037446	Unigene0037180	Unigene0020321	Unigene0026427	Unigene0027090	Unigene0041649	Unigene0044139	Unigene0028022	Unigene0012557	Unigene0001948	Unigene0034822	0.00408947	0.0482895	0.0846866	0.0777	0.9174
ORTHOMCL7055	Unigene0041458	Unigene0002269	Unigene0013912	Unigene0035758	Unigene0003621	Unigene0023257	Unigene0046543	Unigene0043686	Unigene0019867	Unigene0048513	Unigene0018879	0.00175263	0.0206474	0.084884	0.0335	0.3924
ORTHOMCL5290	Unigene0000575	Unigene0040417	Unigene0017543	Unigene0026117	Unigene0025616	Unigene0008426	Unigene0018618	Unigene0018883	Unigene0014532	Unigene0004199	Unigene0035774	0.00240526	0.0283158	0.0849442	0.0457	0.5382
ORTHOMCL4406	Unigene0016094	Unigene0034230	Unigene0000543	Unigene0000495	Unigene0000173	Unigene0000066	Unigene0010429	Unigene0003360	Unigene0000480	Unigene0000016	Unigene0000338	0.00131579	0.0154579	0.0851209	0.0249	0.2938
ORTHOMCL6708	Unigene0004929	Unigene0001992	Unigene0019611	Unigene0020987	Unigene0014837	Unigene0013296	Unigene0007253	Unigene0027935	Unigene0039210	Unigene0036724	Unigene0008554	0.00204211	0.0239842	0.0851437	0.0388	0.4558
ORTHOMCL5730	Unigene0006009	Unigene0031767	Unigene0023115	Unigene0030150	Unigene0036332	Unigene0017465	Unigene0019612	Unigene0030428	Unigene0001226	Unigene0007332	Unigene0022329	0.000494737	0.00581053	0.0851449	0.0094	0.1105
ORTHOMCL4627	Unigene0001246	Unigene0000204	Unigene0022354	Unigene0000324	Unigene0033394	Unigene0000463	Unigene0000548	Unigene0001004	Unigene0000102	Unigene0000122	Unigene0000408	0.00352105	0.0412368	0.0853861	0.0668	0.7835
ORTHOMCL8564	Unigene0006504	Unigene0023186	Unigene0033701	Unigene0014068	Unigene0027135	Unigene0017153	Unigene0021963	Unigene0030440	Unigene0013788	Unigene0003946	Unigene0023849	0.000505263	0.00591579	0.0854093	0.0097	0.1125
ORTHOMCL8219	Unigene0019346	Unigene0023877	Unigene0011970	Unigene0005152	Unigene0003478	Unigene0036077	Unigene0041620	Unigene0013208	Unigene0014682	Unigene0040858	Unigene0034507	0.000678947	0.00794211	0.0854871	0.0129	0.1508
ORTHOMCL4988	Unigene0034838	Unigene0008563	Unigene0029909	Unigene0012854	Unigene0017787	Unigene0012938	Unigene0035461	Unigene0040234	Unigene0000311	Unigene0018913	Unigene0024608	0.000442105	0.00516842	0.0855397	0.0083	0.0982
ORTHOMCL8811	Unigene0040317	Unigene0028617	Unigene0034873	Unigene0035693	Unigene0004381	Unigene0040155	Unigene0028040	Unigene0005157	Unigene0042301	Unigene0013383	Unigene0031468	0.00366316	0.0427842	0.0856194	0.0698	0.8129
ORTHOMCL6177	Unigene0002784	Unigene0019227	Unigene0042866	Unigene0032564	Unigene0019532	Unigene0046359	Unigene0034353	Unigene0004164	Unigene0021800	Unigene0019833	Unigene0001579	0.000921053	0.0107474	0.0857003	0.0175	0.2042
ORTHOMCL8938	Unigene0004607	Unigene0036868	Unigene0014292	Unigene0010878	Unigene0042055	Unigene0039683	Unigene0036278	Unigene0032199	Unigene0008527	Unigene0046363	Unigene0037674	0.000489474	0.00571053	0.0857143	0.0091	0.1086
ORTHOMCL7818	Unigene0045333	Unigene0003029	Unigene0032875	Unigene0031737	Unigene0034321	Unigene0035620	Unigene0034878	Unigene0015189	Unigene0041330	Unigene0038502	Unigene0024031	0.00110526	0.0128684	0.0858896	0.021	0.2446
ORTHOMCL7958	Unigene0045246	Unigene0033206	Unigene0037774	Unigene0034318	Unigene0045353	Unigene0003162	Unigene0045106	Unigene0045944	Unigene0020839	Unigene0030799	Unigene0039642	0.00281579	0.0327474	0.0859852	0.0536	0.622
ORTHOMCL9946	Unigene0007898	Unigene0038069	Unigene0038275	Unigene0021932	Unigene0044167	Unigene0040447	Unigene0019118	Unigene0025256	Unigene0013368	Unigene0014802	Unigene0010157	0.00445263	0.0517368	0.0860631	0.0845	0.983
ORTHOMCL4400	Unigene0001971	Unigene0000180	Unigene0020001	Unigene0023602	Unigene0047371	Unigene0000440	Unigene0029439	Unigene0018748	Unigene0000015	Unigene0031583	Unigene0012093	0.00162105	0.0188316	0.0860816	0.0307	0.3578
ORTHOMCL10517	Unigene0041229	Unigene0039373	Unigene0012709	Unigene0027759	Unigene0025312	Unigene0030066	Unigene0025589	Unigene0041188	Unigene0032412	Unigene0028492	Unigene0019551	0.00178421	0.0207263	0.0860843	0.0338	0.3941
ORTHOMCL7116	Unigene0039051	Unigene0002337	Unigene0042231	Unigene0003237	Unigene0011381	Unigene0036207	Unigene0006605	Unigene0018327	Unigene0021227	Unigene0007959	Unigene0013261	0.000584211	0.00678421	0.0861133	0.0111	0.1289
ORTHOMCL7793	Unigene0024191	Unigene0036634	Unigene0013262	Unigene0023128	Unigene0011158	Unigene0006364	Unigene0018971	Unigene0008185	Unigene0003009	Unigene0032494	Unigene0003814	0.000547368	0.00634211	0.0863071	0.0105	0.1204
ORTHOMCL7212	Unigene0003437	Unigene0020100	Unigene0040177	Unigene0007520	Unigene0003088	Unigene0005497	Unigene0046102	Unigene0046182	Unigene0030003	Unigene0002417	Unigene0016425	0.00392105	0.0454263	0.0863168	0.0745	0.8629
ORTHOMCL5877	Unigene0002324	Unigene0034991	Unigene0003428	Unigene0038811	Unigene0001464	Unigene0001371	Unigene0025080	Unigene0039381	Unigene0035643	Unigene0036527	Unigene0025976	0.000952632	0.0110263	0.0863962	0.0182	0.2097
ORTHOMCL6244	Unigene0004669	Unigene0015314	Unigene0041166	Unigene0038862	Unigene0003337	Unigene0001632	Unigene0020807	Unigene0002252	Unigene0013898	Unigene0012876	Unigene0018265	0.001	0.0115579	0.0865209	0.019	0.2196
ORTHOMCL5270	Unigene0001363	Unigene0020399	Unigene0006900	Unigene0038073	Unigene0028208	Unigene0007216	Unigene0042804	Unigene0000549	Unigene0011867	Unigene0003055	Unigene0029877	0.00224737	0.0259684	0.0865424	0.0428	0.4934
ORTHOMCL4377	Unigene0042512	Unigene0000868	Unigene0000595	Unigene0000007	Unigene0022734	Unigene0015244	Unigene0043034	Unigene0007168	Unigene0011489	Unigene0001339	Unigene0000391	0.00206842	0.0238895	0.0865829	0.0393	0.454
ORTHOMCL6323	Unigene0012623	Unigene0003285	Unigene0043173	Unigene0011108	Unigene0008270	Unigene0038601	Unigene0018677	Unigene0005234	Unigene0003251	Unigene0001688	Unigene0004718	0.000489474	0.00563684	0.0868347	0.0094	0.1072
ORTHOMCL6449	Unigene0037840	Unigene0035501	Unigene0034181	Unigene0033026	Unigene0030036	Unigene0040405	Unigene0001782	Unigene0026866	Unigene0022679	Unigene0025718	Unigene0006961	0.00367895	0.0422842	0.0870052	0.07	0.8034
ORTHOMCL8430	Unigene0006469	Unigene0040011	Unigene0011174	Unigene0031283	Unigene0023810	Unigene0043381	Unigene0040513	Unigene0024035	Unigene0012845	Unigene0021705	Unigene0003748	0.00299474	0.0343632	0.0871496	0.0568	0.6532
ORTHOMCL8881	Unigene0043986	Unigene0037801	Unigene0004511	Unigene0032637	Unigene0035292	Unigene0044685	Unigene0029300	Unigene0045255	Unigene0038660	Unigene0021480	Unigene0032889	0.00175263	0.0200632	0.0873557	0.0333	0.3812
ORTHOMCL4757	Unigene0003023	Unigene0002077	Unigene0011566	Unigene0035087	Unigene0022271	Unigene0010767	Unigene0042026	Unigene0026850	Unigene0000164	Unigene0009722	Unigene0003194	0.00225789	0.0258263	0.0874261	0.0429	0.4907
ORTHOMCL7204	Unigene0017102	Unigene0029082	Unigene0025725	Unigene0035853	Unigene0034622	Unigene0002409	Unigene0046208	Unigene0042901	Unigene0042376	Unigene0027302	Unigene0030900	0.000978947	0.0111895	0.0874882	0.0187	0.2126
ORTHOMCL9981	Unigene0037250	Unigene0033693	Unigene0042957	Unigene0020723	Unigene0042665	Unigene0039051	Unigene0029531	Unigene0024414	Unigene0041718	Unigene0008059	Unigene0031880	0.000468421	0.00535263	0.0875123	0.009	0.1018
ORTHOMCL6981	Unigene0003400	Unigene0035802	Unigene0040019	Unigene0004669	Unigene0012302	Unigene0025770	Unigene0017836	Unigene0012752	Unigene0002210	Unigene0014466	Unigene0012981	0.000910526	0.0103895	0.0876393	0.0174	0.1974
ORTHOMCL7564	Unigene0025461	Unigene0006543	Unigene0022013	Unigene0013112	Unigene0030048	Unigene0010322	Unigene0002753	Unigene0029948	Unigene0035769	Unigene0035890	Unigene0008358	0.00117368	0.0133895	0.0876572	0.0223	0.2545
ORTHOMCL10681	Unigene0031362	Unigene0034329	Unigene0035692	Unigene0034237	Unigene0018728	Unigene0024497	Unigene0020852	Unigene0015145	Unigene0025966	Unigene0017863	Unigene0031949	0.00227368	0.0259105	0.0877514	0.043	0.4924
ORTHOMCL7730	Unigene0016370	Unigene0035318	Unigene0025597	Unigene0038004	Unigene0031781	Unigene0039873	Unigene0022370	Unigene0024536	Unigene0005551	Unigene0045963	Unigene0002942	0.00250526	0.0284368	0.0880992	0.0477	0.5403
ORTHOMCL6751	Unigene0042204	Unigene0029269	Unigene0008136	Unigene0030178	Unigene0010219	Unigene0009480	Unigene0035544	Unigene0023819	Unigene0002027	Unigene0042484	Unigene0008852	0.000647368	0.00734211	0.088172	0.0124	0.1395
ORTHOMCL9992	Unigene0038936	Unigene0041242	Unigene0011359	Unigene0015483	Unigene0015009	Unigene0008130	Unigene0013907	Unigene0028233	Unigene0016384	Unigene0022535	Unigene0017948	0.00194211	0.0219947	0.0882986	0.0369	0.4181
ORTHOMCL7721	Unigene0024506	Unigene0003455	Unigene0002923	Unigene0035697	Unigene0043371	Unigene0006880	Unigene0043441	Unigene0007138	Unigene0015322	Unigene0034471	Unigene0028760	0.000594737	0.00672632	0.0884194	0.0112	0.1279
ORTHOMCL5289	Unigene0007259	Unigene0037699	Unigene0000574	Unigene0036473	Unigene0027045	Unigene0016549	Unigene0013343	Unigene0005710	Unigene0014166	Unigene0027377	Unigene0028770	0.000931579	0.0105053	0.0886774	0.0178	0.1996
ORTHOMCL9659	Unigene0042777	Unigene0027101	Unigene0039762	Unigene0006601	Unigene0041916	Unigene0046883	Unigene0030508	Unigene0047411	Unigene0038953	Unigene0044997	Unigene0039491	0.00193158	0.0217789	0.0886902	0.0367	0.4139
ORTHOMCL10069	Unigene0008554	Unigene0038837	Unigene0020527	Unigene0016145	Unigene0030615	Unigene0042933	Unigene0044703	Unigene0026418	Unigene0033633	Unigene0022231	Unigene0020883	0.00193684	0.0218316	0.0887175	0.0367	0.4147
ORTHOMCL10659	Unigene0039594	Unigene0023131	Unigene0014760	Unigene0026016	Unigene0016553	Unigene0041457	Unigene0047860	Unigene0029716	Unigene0037527	Unigene0032975	Unigene0029915	0.00159474	0.0179421	0.0888824	0.0303	0.341
ORTHOMCL5228	Unigene0024802	Unigene0000514	Unigene0035058	Unigene0031744	Unigene0018916	Unigene0029198	Unigene0019001	Unigene0044936	Unigene0001522	Unigene0028519	Unigene0020679	0.00248947	0.0280053	0.0888931	0.0473	0.5322
ORTHOMCL8214	Unigene0007484	Unigene0036803	Unigene0007230	Unigene0003469	Unigene0035020	Unigene0035093	Unigene0009046	Unigene0014599	Unigene0041447	Unigene0003917	Unigene0039798	0.00157895	0.0176842	0.0892857	0.0299	0.336
ORTHOMCL4933	Unigene0037056	Unigene0001902	Unigene0038825	Unigene0032451	Unigene0038715	Unigene0040684	Unigene0045553	Unigene0035126	Unigene0000270	Unigene0039297	Unigene0032080	0.00158421	0.0177	0.0895034	0.0302	0.3362
ORTHOMCL5923	Unigene0035866	Unigene0026341	Unigene0011482	Unigene0001398	Unigene0026017	Unigene0032926	Unigene0011131	Unigene0029135	Unigene0032105	Unigene0002521	Unigene0034679	0.00421579	0.0470947	0.0895172	0.0799	0.895
ORTHOMCL8677	Unigene0014684	Unigene0014117	Unigene0015820	Unigene0018560	Unigene0004123	Unigene0017432	Unigene0008098	Unigene0018365	Unigene0033343	Unigene0027834	Unigene0033155	0.00258421	0.0288632	0.0895332	0.0492	0.5484
ORTHOMCL7323	Unigene0013842	Unigene0007733	Unigene0037706	Unigene0010032	Unigene0044531	Unigene0041033	Unigene0012476	Unigene0016037	Unigene0027413	Unigene0009615	Unigene0002530	0.00126842	0.0141632	0.0895578	0.0242	0.269
ORTHOMCL6641	Unigene0039367	Unigene0036898	Unigene0021669	Unigene0020062	Unigene0001940	Unigene0026475	Unigene0007957	Unigene0008780	Unigene0015954	Unigene0011817	Unigene0028572	0.00112105	0.0124947	0.089722	0.0213	0.2374
ORTHOMCL8128	Unigene0037168	Unigene0011753	Unigene0009502	Unigene0029420	Unigene0044317	Unigene0004929	Unigene0040825	Unigene0040957	Unigene0034275	Unigene0012114	Unigene0003365	0.000610526	0.00678947	0.0899225	0.0117	0.129
ORTHOMCL8537	Unigene0011577	Unigene0041729	Unigene0031416	Unigene0025824	Unigene0034939	Unigene0023087	Unigene0038657	Unigene0021173	Unigene0026225	Unigene0003908	Unigene0031436	0.00112105	0.0124368	0.0901397	0.0212	0.2364
ORTHOMCL4631	Unigene0031872	Unigene0034666	Unigene0000103	Unigene0012399	Unigene0030288	Unigene0000141	Unigene0029859	Unigene0043768	Unigene0033985	Unigene0027035	Unigene0031052	0.00207895	0.0230421	0.0902238	0.0396	0.4378
ORTHOMCL10895	Unigene0037976	Unigene0038992	Unigene0035612	Unigene0020664	Unigene0020788	Unigene0027773	Unigene0030118	Unigene0031570	Unigene0028609	Unigene0045155	Unigene0031109	0.00128421	0.0141947	0.0904709	0.0245	0.2698
ORTHOMCL5408	Unigene0000774	Unigene0038476	Unigene0028462	Unigene0032538	Unigene0041746	Unigene0042394	Unigene0030734	Unigene0042239	Unigene0041211	Unigene0043252	Unigene0037214	0.00346316	0.0382211	0.0906086	0.0657	0.7263
ORTHOMCL9582	Unigene0010252	Unigene0008198	Unigene0017262	Unigene0013059	Unigene0047515	Unigene0018686	Unigene0006355	Unigene0027521	Unigene0042056	Unigene0041611	Unigene0010779	0.000810526	0.00894211	0.0906416	0.0154	0.1699
ORTHOMCL4499	Unigene0000309	Unigene0000897	Unigene0000691	Unigene0000336	Unigene0000489	Unigene0000051	Unigene0001009	Unigene0001021	Unigene0000638	Unigene0000655	Unigene0021583	0.00153684	0.0169526	0.0906551	0.029	0.322
ORTHOMCL8180	Unigene0044135	Unigene0003974	Unigene0017239	Unigene0003427	Unigene0040652	Unigene0040884	Unigene0021736	Unigene0022243	Unigene0034965	Unigene0047248	Unigene0037046	0.00213684	0.0235526	0.0907263	0.0406	0.4476
ORTHOMCL7298	Unigene0002509	Unigene0006941	Unigene0007875	Unigene0007239	Unigene0013728	Unigene0016729	Unigene0036729	Unigene0009808	Unigene0033984	Unigene0033637	Unigene0039945	0.00191053	0.0210368	0.0908181	0.0362	0.3997
ORTHOMCL10544	Unigene0026704	Unigene0030647	Unigene0017152	Unigene0015852	Unigene0027855	Unigene0013056	Unigene0028824	Unigene0044504	Unigene0033498	Unigene0026305	Unigene0030786	0.00258947	0.0284947	0.0908755	0.0491	0.5412
ORTHOMCL6262	Unigene0045060	Unigene0038693	Unigene0006025	Unigene0004601	Unigene0045888	Unigene0001646	Unigene0046777	Unigene0044646	Unigene0040276	Unigene0024138	Unigene0029720	0.00399474	0.0438263	0.0911493	0.0759	0.8327
ORTHOMCL10636	Unigene0038820	Unigene0034431	Unigene0014448	Unigene0032054	Unigene0045338	Unigene0045670	Unigene0041875	Unigene0042100	Unigene0041129	Unigene0031241	Unigene0038379	0.00185263	0.0203053	0.091239	0.035	0.3859
ORTHOMCL9355	Unigene0022334	Unigene0034642	Unigene0019751	Unigene0036553	Unigene0023316	Unigene0008927	Unigene0030268	Unigene0025961	Unigene0033616	Unigene0027128	Unigene0005614	0.00128947	0.0140895	0.0915204	0.0246	0.2676
ORTHOMCL6643	Unigene0044163	Unigene0039067	Unigene0012146	Unigene0007757	Unigene0001941	Unigene0029865	Unigene0037098	Unigene0018403	Unigene0011229	Unigene0010358	Unigene0003117	0.00346842	0.0378737	0.0915787	0.0659	0.7196
ORTHOMCL9756	Unigene0018766	Unigene0022233	Unigene0038575	Unigene0010961	Unigene0011290	Unigene0043223	Unigene0008790	Unigene0006999	Unigene0007173	Unigene0024213	Unigene0022603	0.000989474	0.0107842	0.0917521	0.0188	0.2049
ORTHOMCL10741	Unigene0035525	Unigene0022243	Unigene0016285	Unigene0031267	Unigene0029611	Unigene0025454	Unigene0036515	Unigene0040238	Unigene0035781	Unigene0027553	Unigene0022542	0.00202632	0.0220632	0.0918416	0.0386	0.4192
ORTHOMCL4876	Unigene0037605	Unigene0038892	Unigene0031534	Unigene0035349	Unigene0000475	Unigene0000236	Unigene0009731	Unigene0040244	Unigene0002452	Unigene0048274	Unigene0018453	0.00115263	0.0125474	0.0918624	0.0219	0.2384
ORTHOMCL5375	Unigene0029421	Unigene0003290	Unigene0036213	Unigene0019925	Unigene0022629	Unigene0025340	Unigene0010484	Unigene0000731	Unigene0036277	Unigene0003683	Unigene0030255	0.00212105	0.0230632	0.0919671	0.0406	0.4382
ORTHOMCL6069	Unigene0005505	Unigene0019548	Unigene0001499	Unigene0001875	Unigene0042594	Unigene0030537	Unigene0036483	Unigene0013712	Unigene0010299	Unigene0031513	Unigene0038514	0.000584211	0.00634211	0.0921162	0.011	0.1205
ORTHOMCL10423	Unigene0011714	Unigene0015293	Unigene0034991	Unigene0029482	Unigene0026605	Unigene0033679	Unigene0040792	Unigene0046249	Unigene0032091	Unigene0017944	Unigene0029128	0.00135789	0.0146895	0.09244	0.0257	0.2792
ORTHOMCL4920	Unigene0001322	Unigene0033588	Unigene0037986	Unigene0005860	Unigene0000261	Unigene0000398	Unigene0002353	Unigene0001689	Unigene0038256	Unigene0009337	Unigene0018370	0.00216316	0.0233789	0.0925259	0.0412	0.4442
ORTHOMCL7719	Unigene0013764	Unigene0004814	Unigene0042838	Unigene0024533	Unigene0004386	Unigene0044589	Unigene0003526	Unigene0008863	Unigene0041922	Unigene0008229	Unigene0002922	0.000442105	0.00477368	0.092613	0.0083	0.0908
ORTHOMCL4553	Unigene0001556	Unigene0000922	Unigene0000547	Unigene0000070	Unigene0030486	Unigene0000981	Unigene0000198	Unigene0001437	Unigene0000773	Unigene0000387	Unigene0000500	0.00176316	0.0190368	0.0926182	0.0337	0.3617
ORTHOMCL5026	Unigene0036226	Unigene0001005	Unigene0042678	Unigene0029773	Unigene0037270	Unigene0014206	Unigene0011077	Unigene0033522	Unigene0000343	Unigene0005406	Unigene0039316	0.00118421	0.0127684	0.0927453	0.0225	0.2425
ORTHOMCL9970	Unigene0008003	Unigene0033489	Unigene0020404	Unigene0014169	Unigene0022712	Unigene0027382	Unigene0012444	Unigene0046716	Unigene0032344	Unigene0027081	Unigene0034614	0.000915789	0.00986842	0.0928	0.0173	0.1876
ORTHOMCL9809	Unigene0012192	Unigene0013709	Unigene0019624	Unigene0021485	Unigene0028506	Unigene0007231	Unigene0031518	Unigene0034787	Unigene0031906	Unigene0017166	Unigene0012993	0.00240526	0.0258789	0.0929429	0.0456	0.4917
ORTHOMCL5258	Unigene0000539	Unigene0012030	Unigene0001756	Unigene0008502	Unigene0031699	Unigene0025099	Unigene0042732	Unigene0004479	Unigene0035200	Unigene0008848	Unigene0039060	0.00117895	0.0126632	0.0931006	0.0223	0.2406
ORTHOMCL6500	Unigene0010378	Unigene0019940	Unigene0031191	Unigene0021747	Unigene0037393	Unigene0037390	Unigene0001817	Unigene0039663	Unigene0015985	Unigene0030352	Unigene0023343	0.000610526	0.00655263	0.0931727	0.0116	0.1246
ORTHOMCL7877	Unigene0041122	Unigene0040783	Unigene0036189	Unigene0021115	Unigene0040283	Unigene0030132	Unigene0019384	Unigene0040493	Unigene0034448	Unigene0003074	Unigene0038165	0.00322632	0.0346211	0.0931894	0.0613	0.6579
ORTHOMCL6398	Unigene0014804	Unigene0003438	Unigene0010101	Unigene0011823	Unigene0026746	Unigene0028336	Unigene0011736	Unigene0033916	Unigene0032817	Unigene0030280	Unigene0001748	0.000752632	0.00804737	0.0935252	0.0143	0.1529
ORTHOMCL10548	Unigene0041322	Unigene0035664	Unigene0017277	Unigene0016943	Unigene0023144	Unigene0022751	Unigene0021354	Unigene0047255	Unigene0033903	Unigene0013097	Unigene0014328	0.000815789	0.00871053	0.0936556	0.0155	0.1655
ORTHOMCL9152	Unigene0043154	Unigene0005060	Unigene0028395	Unigene0034198	Unigene0029808	Unigene0045497	Unigene0011538	Unigene0040223	Unigene0034319	Unigene0019394	Unigene0021028	0.00234211	0.0249368	0.0939215	0.0446	0.4735
ORTHOMCL9747	Unigene0014806	Unigene0033055	Unigene0042247	Unigene0039260	Unigene0014209	Unigene0043464	Unigene0014731	Unigene0025044	Unigene0042689	Unigene0048313	Unigene0006942	0.000547368	0.00582632	0.0939476	0.0105	0.1108
ORTHOMCL6837	Unigene0002084	Unigene0039939	Unigene0031341	Unigene0029293	Unigene0040543	Unigene0037511	Unigene0039212	Unigene0035428	Unigene0029370	Unigene0035268	Unigene0027068	0.00138947	0.0147895	0.0939502	0.0263	0.2812
ORTHOMCL6535	Unigene0001848	Unigene0016693	Unigene0042456	Unigene0034651	Unigene0019867	Unigene0034028	Unigene0028465	Unigene0003340	Unigene0036707	Unigene0008361	Unigene0011473	0.000805263	0.00856842	0.0939803	0.0154	0.1629
ORTHOMCL6205	Unigene0041275	Unigene0034124	Unigene0025189	Unigene0040486	Unigene0001604	Unigene0006322	Unigene0047604	Unigene0008059	Unigene0038578	Unigene0048208	Unigene0037424	0.00188421	0.0200158	0.0941362	0.0356	0.3803
ORTHOMCL7171	Unigene0004524	Unigene0018724	Unigene0022099	Unigene0036856	Unigene0004411	Unigene0003187	Unigene0023139	Unigene0002386	Unigene0040408	Unigene0048551	Unigene0020680	0.000347368	0.00368947	0.0941512	0.0064	0.07
ORTHOMCL5859	Unigene0025377	Unigene0036978	Unigene0037204	Unigene0036157	Unigene0029879	Unigene0023300	Unigene0034872	Unigene0044368	Unigene0001354	Unigene0045192	Unigene0034497	0.000636842	0.00675263	0.0943102	0.0121	0.1284
ORTHOMCL9987	Unigene0009723	Unigene0021430	Unigene0032919	Unigene0032103	Unigene0015321	Unigene0019160	Unigene0020654	Unigene0030481	Unigene0029513	Unigene0008087	Unigene0031952	0.00238421	0.0252737	0.0943357	0.0451	0.4804
ORTHOMCL10481	Unigene0039993	Unigene0030055	Unigene0041390	Unigene0026044	Unigene0037338	Unigene0033109	Unigene0039102	Unigene0033213	Unigene0021094	Unigene0039438	Unigene0012227	0.000710526	0.00753158	0.0943396	0.0136	0.1432
ORTHOMCL10055	Unigene0043447	Unigene0013381	Unigene0022089	Unigene0039664	Unigene0017096	Unigene0017236	Unigene0036857	Unigene0047085	Unigene0011696	Unigene0008445	Unigene0039138	0.00122632	0.0129895	0.0944084	0.0231	0.2468
ORTHOMCL9471	Unigene0013278	Unigene0024186	Unigene0007485	Unigene0007813	Unigene0045965	Unigene0005951	Unigene0026348	Unigene0027750	Unigene0013755	Unigene0010051	Unigene0015611	0.00226842	0.0240263	0.094414	0.0429	0.4566
ORTHOMCL5657	Unigene0006089	Unigene0023605	Unigene0020423	Unigene0018214	Unigene0002133	Unigene0028834	Unigene0023957	Unigene0003282	Unigene0032551	Unigene0024995	Unigene0001150	0.00213158	0.0225737	0.0944276	0.0405	0.4289
ORTHOMCL10029	Unigene0029353	Unigene0014096	Unigene0023139	Unigene0040481	Unigene0022982	Unigene0047051	Unigene0025282	Unigene0023908	Unigene0020751	Unigene0031019	Unigene0008308	0.000847368	0.00896316	0.094539	0.0159	0.1704
ORTHOMCL4700	Unigene0044152	Unigene0038541	Unigene0001078	Unigene0034023	Unigene0043288	Unigene0001137	Unigene0046337	Unigene0022404	Unigene0006283	Unigene0047656	Unigene0000134	0.0018	0.0190316	0.0945796	0.0343	0.3617
ORTHOMCL9180	Unigene0045147	Unigene0005326	Unigene0027019	Unigene0040847	Unigene0009698	Unigene0005123	Unigene0015563	Unigene0032293	Unigene0008840	Unigene0041643	Unigene0014157	0.000847368	0.00895789	0.0945946	0.016	0.1704
ORTHOMCL5020	Unigene0045014	Unigene0000339	Unigene0012682	Unigene0032586	Unigene0042472	Unigene0042985	Unigene0030373	Unigene0006102	Unigene0001453	Unigene0016855	Unigene0002897	0.00116316	0.0122842	0.0946872	0.0222	0.2336
ORTHOMCL7011	Unigene0031799	Unigene0015342	Unigene0018970	Unigene0021068	Unigene0017144	Unigene0040042	Unigene0003227	Unigene0003039	Unigene0002232	Unigene0021837	Unigene0014769	0.00177895	0.0187842	0.0947044	0.0339	0.3569
ORTHOMCL9079	Unigene0041028	Unigene0021229	Unigene0005372	Unigene0024637	Unigene0038900	Unigene0044918	Unigene0010090	Unigene0004898	Unigene0026125	Unigene0023071	Unigene0038993	0.00148947	0.0157053	0.0948391	0.0283	0.2985
ORTHOMCL8693	Unigene0042450	Unigene0032720	Unigene0038001	Unigene0032387	Unigene0044635	Unigene0041150	Unigene0030108	Unigene0019254	Unigene0004159	Unigene0030195	Unigene0006716	0.00326316	0.0343632	0.0949609	0.0618	0.653
ORTHOMCL4931	Unigene0041893	Unigene0000269	Unigene0041294	Unigene0019865	Unigene0018376	Unigene0006514	Unigene0042221	Unigene0041499	Unigene0008747	Unigene0028096	Unigene0036437	0.000521053	0.00546842	0.0952839	0.0098	0.104
ORTHOMCL6983	Unigene0003217	Unigene0015894	Unigene0033486	Unigene0020467	Unigene0037327	Unigene0002210	Unigene0017772	Unigene0012302	Unigene0004847	Unigene0039867	Unigene0038257	0.0007	0.00734211	0.0953405	0.0132	0.1396
ORTHOMCL5865	Unigene0037591	Unigene0039994	Unigene0034690	Unigene0035015	Unigene0013090	Unigene0003166	Unigene0011381	Unigene0033288	Unigene0035977	Unigene0001363	Unigene0015993	0.000836842	0.00877368	0.0953809	0.016	0.1666
ORTHOMCL8640	Unigene0033540	Unigene0022610	Unigene0011474	Unigene0029242	Unigene0037431	Unigene0035423	Unigene0025138	Unigene0004052	Unigene0015141	Unigene0025691	Unigene0023465	0.000905263	0.00948421	0.0954495	0.0173	0.1802
ORTHOMCL10021	Unigene0022422	Unigene0035268	Unigene0008284	Unigene0039110	Unigene0041710	Unigene0015298	Unigene0038086	Unigene0046847	Unigene0040742	Unigene0025259	Unigene0028429	0.00344211	0.0360316	0.0955302	0.0657	0.6848
ORTHOMCL10578	Unigene0036636	Unigene0040738	Unigene0015070	Unigene0035725	Unigene0013489	Unigene0028377	Unigene0017576	Unigene0034850	Unigene0033523	Unigene0016316	Unigene0033980	0.000905263	0.00945789	0.0957151	0.0172	0.1797
ORTHOMCL9790	Unigene0012646	Unigene0033242	Unigene0008462	Unigene0025106	Unigene0033584	Unigene0007142	Unigene0025823	Unigene0017026	Unigene0021644	Unigene0046342	Unigene0030563	0.00175789	0.0183579	0.0957569	0.0335	0.3488
ORTHOMCL9036	Unigene0037453	Unigene0027093	Unigene0032419	Unigene0026192	Unigene0026028	Unigene0004812	Unigene0023243	Unigene0044751	Unigene0005512	Unigene0011631	Unigene0031608	0.000973684	0.0101632	0.0958053	0.0185	0.1931
ORTHOMCL8083	Unigene0038479	Unigene0006840	Unigene0010746	Unigene0038866	Unigene0025965	Unigene0009215	Unigene0005135	Unigene0003322	Unigene0039796	Unigene0023897	Unigene0032499	0.00227895	0.0237842	0.0958177	0.0433	0.452
ORTHOMCL4555	Unigene0039926	Unigene0000071	Unigene0027613	Unigene0024067	Unigene0035300	Unigene0033908	Unigene0005085	Unigene0042377	Unigene0000265	Unigene0040915	Unigene0005433	0.000463158	0.00482632	0.0959651	0.0089	0.0918
ORTHOMCL6261	Unigene0021561	Unigene0021726	Unigene0001646	Unigene0034630	Unigene0003998	Unigene0020179	Unigene0013208	Unigene0030632	Unigene0033084	Unigene0006086	Unigene0012852	0.00238421	0.0248105	0.0960967	0.0453	0.4714
ORTHOMCL4497	Unigene0043590	Unigene0016944	Unigene0006270	Unigene0000909	Unigene0001173	Unigene0002400	Unigene0041898	Unigene0041248	Unigene0013387	Unigene0000051	Unigene0000549	0.00237895	0.0246737	0.0964164	0.0452	0.469
ORTHOMCL9600	Unigene0042052	Unigene0009696	Unigene0009874	Unigene0033885	Unigene0009406	Unigene0045773	Unigene0047798	Unigene0046227	Unigene0025477	Unigene0048414	Unigene0006393	0.0005	0.00517895	0.0965447	0.0094	0.0984
ORTHOMCL6473	Unigene0021503	Unigene0025269	Unigene0003073	Unigene0038364	Unigene0023344	Unigene0025338	Unigene0017652	Unigene0001799	Unigene0029404	Unigene0023374	Unigene0015727	0.00173158	0.0179263	0.0965942	0.0331	0.3407
ORTHOMCL10273	Unigene0038008	Unigene0010226	Unigene0038447	Unigene0020257	Unigene0018744	Unigene0015422	Unigene0043577	Unigene0035119	Unigene0037526	Unigene0044420	Unigene0029497	0.000584211	0.00604737	0.0966057	0.0112	0.1149
ORTHOMCL5944	Unigene0045465	Unigene0035341	Unigene0001410	Unigene0020324	Unigene0004276	Unigene0046901	Unigene0005260	Unigene0040505	Unigene0032916	Unigene0002257	Unigene0009756	0.000942105	0.00974737	0.0966523	0.0181	0.1853
ORTHOMCL5778	Unigene0022195	Unigene0035943	Unigene0015051	Unigene0035929	Unigene0041530	Unigene0019801	Unigene0002871	Unigene0004917	Unigene0001270	Unigene0001266	Unigene0037279	0.000436842	0.00451579	0.0967366	0.0083	0.0858
ORTHOMCL6353	Unigene0042771	Unigene0035766	Unigene0011164	Unigene0032493	Unigene0041729	Unigene0042131	Unigene0001714	Unigene0041202	Unigene0027654	Unigene0045769	Unigene0020834	0.00172105	0.0177684	0.0968602	0.0329	0.3376
ORTHOMCL10314	Unigene0030902	Unigene0032173	Unigene0010606	Unigene0025389	Unigene0036699	Unigene0012530	Unigene0039405	Unigene0043858	Unigene0029681	Unigene0011696	Unigene0027381	0.00124211	0.0127579	0.0973597	0.0236	0.2423
ORTHOMCL9551	Unigene0020183	Unigene0016516	Unigene0034869	Unigene0036078	Unigene0044082	Unigene0037028	Unigene0033943	Unigene0006247	Unigene0006886	Unigene0028922	Unigene0033693	0.00128421	0.0131895	0.0973663	0.0245	0.2507
ORTHOMCL9848	Unigene0007396	Unigene0038833	Unigene0035425	Unigene0017969	Unigene0028600	Unigene0012934	Unigene0032446	Unigene0042408	Unigene0023073	Unigene0024810	Unigene0022921	0.00243684	0.0250158	0.0974122	0.0463	0.4754
ORTHOMCL4786	Unigene0001439	Unigene0026323	Unigene0000182	Unigene0000362	Unigene0002898	Unigene0039908	Unigene0000457	Unigene0001392	Unigene0012997	Unigene0034172	Unigene0001020	0.00240526	0.0246737	0.0974829	0.0457	0.4687
ORTHOMCL5552	Unigene0017518	Unigene0009872	Unigene0043371	Unigene0001027	Unigene0046736	Unigene0014515	Unigene0047800	Unigene0007227	Unigene0007118	Unigene0001558	Unigene0003048	0.000663158	0.00678421	0.0977502	0.0126	0.129
ORTHOMCL5023	Unigene0014889	Unigene0000341	Unigene0025789	Unigene0031499	Unigene0029095	Unigene0021549	Unigene0006518	Unigene0002594	Unigene0015096	Unigene0021655	Unigene0020415	0.00181053	0.0185053	0.0978385	0.0344	0.3517
ORTHOMCL7800	Unigene0004580	Unigene0003016	Unigene0030198	Unigene0028260	Unigene0027251	Unigene0013055	Unigene0019110	Unigene0039531	Unigene0023197	Unigene0027143	Unigene0004966	0.000857895	0.00875789	0.0979567	0.0163	0.1664
ORTHOMCL4825	Unigene0004260	Unigene0036875	Unigene0008800	Unigene0013434	Unigene0004767	Unigene0000208	Unigene0046917	Unigene0043319	Unigene0038804	Unigene0046444	Unigene0037796	0.00144211	0.0146895	0.0981727	0.0273	0.2792
ORTHOMCL9579	Unigene0009134	Unigene0038168	Unigene0014603	Unigene0031113	Unigene0006339	Unigene0021837	Unigene0031715	Unigene0040870	Unigene0011490	Unigene0024583	Unigene0011676	0.00151053	0.0153632	0.0983213	0.0288	0.2919
ORTHOMCL7463	Unigene0020263	Unigene0015731	Unigene0022952	Unigene0036514	Unigene0002659	Unigene0008774	Unigene0009053	Unigene0013975	Unigene0008991	Unigene0024238	Unigene0039511	0.000663158	0.00674211	0.0983607	0.0127	0.1282
ORTHOMCL7902	Unigene0040233	Unigene0007053	Unigene0006545	Unigene0038808	Unigene0017009	Unigene0034635	Unigene0003391	Unigene0019092	Unigene0040926	Unigene0007490	Unigene0003105	0.00117368	0.0119316	0.0983679	0.0226	0.2267
ORTHOMCL4763	Unigene0001514	Unigene0025074	Unigene0000168	Unigene0000466	Unigene0000950	Unigene0000281	Unigene0000576	Unigene0000611	Unigene0041180	Unigene0000313	Unigene0033165	0.0016	0.0162579	0.0984137	0.0302	0.309
ORTHOMCL6150	Unigene0040333	Unigene0028263	Unigene0001555	Unigene0015757	Unigene0047465	Unigene0020346	Unigene0007859	Unigene0044801	Unigene0016523	Unigene0030677	Unigene0006999	0.0016	0.0162579	0.0984137	0.0303	0.3089
ORTHOMCL8878	Unigene0004503	Unigene0035293	Unigene0039372	Unigene0033861	Unigene0023054	Unigene0021088	Unigene0044272	Unigene0014281	Unigene0040206	Unigene0025374	Unigene0034734	0.00154737	0.0156895	0.0986246	0.0295	0.2982
ORTHOMCL7560	Unigene0017678	Unigene0020535	Unigene0039291	Unigene0039767	Unigene0043232	Unigene0043964	Unigene0045851	Unigene0002749	Unigene0004105	Unigene0047173	Unigene0039006	0.00185789	0.0188316	0.0986585	0.0353	0.3578
ORTHOMCL10740	Unigene0044599	Unigene0023802	Unigene0034969	Unigene0022346	Unigene0021502	Unigene0024385	Unigene0016229	Unigene0044590	Unigene0032456	Unigene0022634	Unigene0033920	0.00123158	0.0124737	0.0987342	0.0232	0.237
ORTHOMCL7655	Unigene0017297	Unigene0002851	Unigene0034139	Unigene0018329	Unigene0015823	Unigene0009193	Unigene0019477	Unigene0031749	Unigene0003155	Unigene0018802	Unigene0024808	0.000652632	0.00659474	0.0989625	0.0124	0.1253
ORTHOMCL4696	Unigene0033705	Unigene0035089	Unigene0035409	Unigene0036820	Unigene0013792	Unigene0001146	Unigene0028070	Unigene0002229	Unigene0000133	Unigene0033424	Unigene0019708	0.00165789	0.0167526	0.0989632	0.0315	0.3183
ORTHOMCL5477	Unigene0036184	Unigene0034332	Unigene0022865	Unigene0017051	Unigene0019774	Unigene0022643	Unigene0027650	Unigene0000885	Unigene0032119	Unigene0018423	Unigene0030942	0.00265789	0.0268474	0.0990002	0.0506	0.5102
ORTHOMCL4552	Unigene0000320	Unigene0000070	Unigene0034291	Unigene0034374	Unigene0022493	Unigene0000205	Unigene0018876	Unigene0018144	Unigene0034141	Unigene0025975	Unigene0029217	0.00133158	0.0134421	0.0990603	0.0253	0.2554
ORTHOMCL9704	Unigene0041272	Unigene0019692	Unigene0036871	Unigene0039992	Unigene0028975	Unigene0029635	Unigene0017548	Unigene0006768	Unigene0033572	Unigene0007523	Unigene0036229	0.00205263	0.0207158	0.0990854	0.0392	0.3935
ORTHOMCL6575	Unigene0010352	Unigene0005957	Unigene0029907	Unigene0020293	Unigene0026587	Unigene0027510	Unigene0023412	Unigene0001889	Unigene0040913	Unigene0024470	Unigene0010867	0.000473684	0.00477895	0.0991189	0.009	0.0908
ORTHOMCL5171	Unigene0045162	Unigene0025683	Unigene0008677	Unigene0000464	Unigene0044584	Unigene0039694	Unigene0043102	Unigene0002768	Unigene0039856	Unigene0007313	Unigene0005891	0.00332632	0.0335316	0.0991995	0.0632	0.6371
ORTHOMCL7295	Unigene0046137	Unigene0029383	Unigene0029955	Unigene0015764	Unigene0028231	Unigene0038960	Unigene0018673	Unigene0035650	Unigene0002507	Unigene0042422	Unigene0018352	0.0011	0.0110579	0.0994764	0.0208	0.2102
ORTHOMCL4961	Unigene0042456	Unigene0011353	Unigene0040958	Unigene0032528	Unigene0043016	Unigene0033070	Unigene0022654	Unigene0045493	Unigene0000296	Unigene0035086	Unigene0029006	0.000773684	0.00777368	0.0995261	0.0148	0.1477
ORTHOMCL5367	Unigene0041356	Unigene0001307	Unigene0037990	Unigene0019362	Unigene0026982	Unigene0022108	Unigene0013476	Unigene0005152	Unigene0017462	Unigene0000715	Unigene0027373	0.00239474	0.0240579	0.0995406	0.0456	0.4573
ORTHOMCL9813	Unigene0026229	Unigene0038616	Unigene0028477	Unigene0024888	Unigene0019504	Unigene0008961	Unigene0045269	Unigene0007250	Unigene0029272	Unigene0012495	Unigene0032726	0.000631579	0.00633684	0.0996678	0.012	0.1204
ORTHOMCL8993	Unigene0021734	Unigene0035347	Unigene0024159	Unigene0013551	Unigene0041198	Unigene0030493	Unigene0028310	Unigene0009309	Unigene0004727	Unigene0008568	Unigene0004830	0.00245789	0.0246579	0.0996798	0.0466	0.4685
ORTHOMCL5803	Unigene0023345	Unigene0035085	Unigene0027010	Unigene0006525	Unigene0042933	Unigene0028353	Unigene0037065	Unigene0042191	Unigene0001285	Unigene0010242	Unigene0029691	0.00195789	0.0196368	0.0997052	0.0374	0.3731
ORTHOMCL9562	Unigene0037353	Unigene0031792	Unigene0041316	Unigene0029330	Unigene0046280	Unigene0036329	Unigene0006286	Unigene0041720	Unigene0022557	Unigene0041593	Unigene0033862	0.000621053	0.00621053	0.1	0.0116	0.118
ORTHOMCL10526	Unigene0040257	Unigene0021296	Unigene0018220	Unigene0031131	Unigene0020849	Unigene0018824	Unigene0025844	Unigene0024274	Unigene0012797	Unigene0031749	Unigene0031470	0.00265263	0.0264737	0.100199	0.0506	0.503
ORTHOMCL7695	Unigene0014549	Unigene0036849	Unigene0017003	Unigene0028085	Unigene0010056	Unigene0019923	Unigene0047986	Unigene0015035	Unigene0038023	Unigene0027219	Unigene0002893	0.000578947	0.00575789	0.100548	0.011	0.1094
ORTHOMCL8169	Unigene0045820	Unigene0035102	Unigene0011459	Unigene0037910	Unigene0006276	Unigene0014595	Unigene0019062	Unigene0003415	Unigene0006586	Unigene0010577	Unigene0019138	0.00205263	0.0203632	0.100801	0.0392	0.3868
ORTHOMCL8519	Unigene0041214	Unigene0011387	Unigene0003875	Unigene0037690	Unigene0045311	Unigene0017839	Unigene0028813	Unigene0022345	Unigene0039518	Unigene0044000	Unigene0038384	0.00153158	0.0151737	0.100937	0.0292	0.2883
ORTHOMCL8400	Unigene0010613	Unigene0040869	Unigene0003700	Unigene0007146	Unigene0047975	Unigene0040960	Unigene0045097	Unigene0045354	Unigene0010040	Unigene0049078	Unigene0039337	0.0138579	0.136616	0.101437	0.2632	2.5957
ORTHOMCL5113	Unigene0022046	Unigene0040653	Unigene0014753	Unigene0029324	Unigene0022014	Unigene0000421	Unigene0025984	Unigene0044543	Unigene0002042	Unigene0021454	Unigene0016528	0.00120526	0.0118684	0.101552	0.0228	0.2254
ORTHOMCL5343	Unigene0022508	Unigene0023470	Unigene0013190	Unigene0029155	Unigene0015035	Unigene0002616	Unigene0047128	Unigene0000669	Unigene0001464	Unigene0021377	Unigene0023326	0.000957895	0.00942105	0.101676	0.0181	0.1789
ORTHOMCL9446	Unigene0029765	Unigene0032886	Unigene0015328	Unigene0005847	Unigene0045751	Unigene0042170	Unigene0028347	Unigene0024756	Unigene0026137	Unigene0020007	Unigene0025817	0.00105789	0.0104	0.101721	0.0201	0.1976
ORTHOMCL6112	Unigene0039436	Unigene0034277	Unigene0037017	Unigene0034868	Unigene0001528	Unigene0039565	Unigene0023636	Unigene0026657	Unigene0032589	Unigene0037644	Unigene0026865	0.00182632	0.0179526	0.10173	0.0348	0.3414
ORTHOMCL6582	Unigene0005106	Unigene0019629	Unigene0004369	Unigene0034791	Unigene0018856	Unigene0015575	Unigene0038781	Unigene0042555	Unigene0023685	Unigene0001897	Unigene0039813	0.00206316	0.0202789	0.101739	0.0393	0.3851
ORTHOMCL8769	Unigene0045519	Unigene0033665	Unigene0024656	Unigene0004295	Unigene0044319	Unigene0037517	Unigene0009843	Unigene0029424	Unigene0033085	Unigene0048874	Unigene0005263	0.00249474	0.0245158	0.10176	0.0474	0.4657
ORTHOMCL4402	Unigene0038162	Unigene0024016	Unigene0041261	Unigene0035540	Unigene0000144	Unigene0042198	Unigene0030733	Unigene0011960	Unigene0004878	Unigene0000015	Unigene0006054	0.00227368	0.0223211	0.101863	0.0434	0.424
ORTHOMCL5741	Unigene0039229	Unigene0040799	Unigene0036648	Unigene0001235	Unigene0032254	Unigene0043276	Unigene0043625	Unigene0045772	Unigene0003757	Unigene0040619	Unigene0032329	0.00177895	0.0174632	0.101869	0.0338	0.332
ORTHOMCL10104	Unigene0037579	Unigene0038360	Unigene0024524	Unigene0013701	Unigene0019198	Unigene0044639	Unigene0014593	Unigene0045931	Unigene0023713	Unigene0018312	Unigene0008792	0.000542105	0.00532105	0.101879	0.0101	0.1011
ORTHOMCL10361	Unigene0041871	Unigene0025366	Unigene0016934	Unigene0036352	Unigene0037399	Unigene0010962	Unigene0041325	Unigene0038712	Unigene0018715	Unigene0045937	Unigene0033259	0.00122105	0.0119842	0.101888	0.0232	0.2277
ORTHOMCL7601	Unigene0041222	Unigene0004107	Unigene0034849	Unigene0018193	Unigene0024532	Unigene0028419	Unigene0007260	Unigene0045900	Unigene0017382	Unigene0002781	Unigene0010004	0.00248421	0.0243737	0.101922	0.0471	0.463
ORTHOMCL8510	Unigene0010350	Unigene0037105	Unigene0003864	Unigene0009284	Unigene0008994	Unigene0009187	Unigene0043291	Unigene0018088	Unigene0031680	Unigene0014086	Unigene0024591	0.000431579	0.00423158	0.10199	0.0081	0.0805
ORTHOMCL7541	Unigene0004456	Unigene0011534	Unigene0038644	Unigene0032761	Unigene0018158	Unigene0040590	Unigene0002735	Unigene0032507	Unigene0040041	Unigene0033144	Unigene0030188	0.00117895	0.0115316	0.102236	0.0224	0.2191
ORTHOMCL8977	Unigene0041407	Unigene0022840	Unigene0036193	Unigene0037260	Unigene0041047	Unigene0004693	Unigene0042312	Unigene0041295	Unigene0033803	Unigene0029900	Unigene0034249	0.000868421	0.00848421	0.102357	0.0166	0.1612
ORTHOMCL6122	Unigene0004546	Unigene0001536	Unigene0042996	Unigene0037381	Unigene0046137	Unigene0042419	Unigene0045807	Unigene0044982	Unigene0015395	Unigene0025414	Unigene0006483	0.00169474	0.0165526	0.102385	0.0323	0.3145
ORTHOMCL9434	Unigene0021710	Unigene0030089	Unigene0024006	Unigene0018137	Unigene0020628	Unigene0025856	Unigene0035552	Unigene0025338	Unigene0026501	Unigene0005805	Unigene0024748	0.0008	0.00781053	0.102426	0.0152	0.1485
ORTHOMCL5824	Unigene0007116	Unigene0032286	Unigene0002574	Unigene0003328	Unigene0007550	Unigene0015997	Unigene0009416	Unigene0045572	Unigene0039012	Unigene0001314	Unigene0011716	0.00467368	0.0456263	0.102434	0.0891	0.8669
ORTHOMCL4991	Unigene0042721	Unigene0020282	Unigene0001026	Unigene0011748	Unigene0025371	Unigene0013670	Unigene0024350	Unigene0002232	Unigene0034411	Unigene0000913	Unigene0000312	0.00295789	0.0288737	0.102443	0.0563	0.5488
ORTHOMCL5999	Unigene0044030	Unigene0025179	Unigene0024460	Unigene0001443	Unigene0017962	Unigene0044212	Unigene0012850	Unigene0028802	Unigene0033301	Unigene0029863	Unigene0033319	0.00315789	0.0308105	0.102494	0.0599	0.5854
ORTHOMCL7275	Unigene0035787	Unigene0036814	Unigene0040784	Unigene0038119	Unigene0032086	Unigene0015786	Unigene0017289	Unigene0040386	Unigene0002486	Unigene0044027	Unigene0036739	0.00107895	0.0105263	0.1025	0.0207	0.2001
ORTHOMCL9086	Unigene0007326	Unigene0017977	Unigene0004909	Unigene0031698	Unigene0038453	Unigene0019463	Unigene0012557	Unigene0045097	Unigene0028547	Unigene0041114	Unigene0007930	0.0007	0.00682632	0.102544	0.0133	0.1296
ORTHOMCL7933	Unigene0017788	Unigene0003141	Unigene0006521	Unigene0020950	Unigene0037904	Unigene0041896	Unigene0044477	Unigene0029388	Unigene0005600	Unigene0007661	Unigene0003389	0.000578947	0.00564211	0.102612	0.0109	0.1072
ORTHOMCL10487	Unigene0014016	Unigene0034954	Unigene0036253	Unigene0023637	Unigene0012269	Unigene0029418	Unigene0027802	Unigene0027562	Unigene0038046	Unigene0028372	Unigene0034486	0.00398421	0.0388105	0.102658	0.0757	0.7372
ORTHOMCL5663	Unigene0031044	Unigene0001161	Unigene0020289	Unigene0029248	Unigene0017925	Unigene0036284	Unigene0004547	Unigene0020077	Unigene0023453	Unigene0022758	Unigene0036629	0.000563158	0.00547368	0.102885	0.0106	0.1041
ORTHOMCL9163	Unigene0005291	Unigene0019680	Unigene0039448	Unigene0038669	Unigene0046169	Unigene0018984	Unigene0005083	Unigene0016269	Unigene0014894	Unigene0020383	Unigene0022560	0.00311579	0.0302684	0.102939	0.059	0.5753
ORTHOMCL9755	Unigene0010039	Unigene0017996	Unigene0019297	Unigene0030159	Unigene0024827	Unigene0035340	Unigene0006995	Unigene0026500	Unigene0010157	Unigene0042459	Unigene0026368	0.000773684	0.00748947	0.103303	0.0148	0.1425
ORTHOMCL5373	Unigene0000728	Unigene0040310	Unigene0008502	Unigene0023695	Unigene0043579	Unigene0015470	Unigene0023207	Unigene0018460	Unigene0026010	Unigene0039453	Unigene0003469	0.00177368	0.0171632	0.103343	0.0337	0.3262
ORTHOMCL6911	Unigene0004480	Unigene0021644	Unigene0025526	Unigene0035906	Unigene0004967	Unigene0037467	Unigene0017142	Unigene0011439	Unigene0027539	Unigene0031103	Unigene0002148	0.000889474	0.0086	0.103427	0.0169	0.1634
ORTHOMCL10024	Unigene0041303	Unigene0011081	Unigene0012447	Unigene0034947	Unigene0042098	Unigene0044455	Unigene0043081	Unigene0008293	Unigene0020567	Unigene0048066	Unigene0020185	0.00158947	0.0153474	0.103567	0.0303	0.2917
ORTHOMCL8555	Unigene0030531	Unigene0012553	Unigene0030254	Unigene0007084	Unigene0010668	Unigene0004251	Unigene0016246	Unigene0036221	Unigene0003932	Unigene0039479	Unigene0020418	0.000668421	0.00645263	0.103589	0.0127	0.1226
ORTHOMCL6800	Unigene0002059	Unigene0003523	Unigene0013407	Unigene0020132	Unigene0033855	Unigene0035403	Unigene0018197	Unigene0006157	Unigene0005137	Unigene0006853	Unigene0023319	0.00153684	0.0148053	0.103804	0.0293	0.2813
ORTHOMCL8055	Unigene0044445	Unigene0023650	Unigene0037959	Unigene0038495	Unigene0029335	Unigene0003284	Unigene0045038	Unigene0028709	Unigene0032499	Unigene0024159	Unigene0017800	0.000768421	0.00738421	0.104063	0.0145	0.1403
ORTHOMCL7189	Unigene0039200	Unigene0004341	Unigene0002398	Unigene0033265	Unigene0017216	Unigene0035421	Unigene0007740	Unigene0042483	Unigene0034404	Unigene0048245	Unigene0011212	0.00136316	0.0130737	0.104267	0.0259	0.2485
ORTHOMCL7022	Unigene0012920	Unigene0007111	Unigene0027566	Unigene0008674	Unigene0031407	Unigene0014011	Unigene0012500	Unigene0031252	Unigene0002243	Unigene0024286	Unigene0013662	0.000610526	0.00585263	0.104317	0.0117	0.1114
ORTHOMCL9227	Unigene0021109	Unigene0040565	Unigene0042027	Unigene0034724	Unigene0012639	Unigene0005220	Unigene0024765	Unigene0047753	Unigene0040055	Unigene0045973	Unigene0035547	0.0048	0.0459263	0.104515	0.0912	0.8727
ORTHOMCL10643	Unigene0038957	Unigene0037361	Unigene0032839	Unigene0038131	Unigene0041544	Unigene0031920	Unigene0034230	Unigene0045438	Unigene0033782	Unigene0014576	Unigene0019355	0.00256842	0.0245684	0.104542	0.0488	0.4667
ORTHOMCL6657	Unigene0033693	Unigene0001953	Unigene0023416	Unigene0036397	Unigene0038506	Unigene0024245	Unigene0024885	Unigene0031992	Unigene0032302	Unigene0029683	Unigene0030573	0.00141053	0.0134842	0.104606	0.0267	0.2564
ORTHOMCL5229	Unigene0039789	Unigene0014078	Unigene0018566	Unigene0036373	Unigene0000515	Unigene0010854	Unigene0029237	Unigene0046091	Unigene0018684	Unigene0010137	Unigene0037736	0.00265789	0.0254053	0.10462	0.0505	0.4826
ORTHOMCL8909	Unigene0022280	Unigene0016472	Unigene0006436	Unigene0004555	Unigene0011444	Unigene0021422	Unigene0041330	Unigene0015514	Unigene0024189	Unigene0030621	Unigene0037094	0.00203684	0.0194421	0.104764	0.0388	0.3693
ORTHOMCL8905	Unigene0037955	Unigene0026181	Unigene0018500	Unigene0015078	Unigene0015415	Unigene0011079	Unigene0036713	Unigene0045828	Unigene0033597	Unigene0010955	Unigene0004551	0.00182105	0.0173579	0.104912	0.0346	0.3297
ORTHOMCL10019	Unigene0032954	Unigene0032091	Unigene0026760	Unigene0029541	Unigene0034274	Unigene0021345	Unigene0034771	Unigene0047232	Unigene0028710	Unigene0033670	Unigene0008280	0.000526316	0.00501579	0.104932	0.0101	0.0954
ORTHOMCL9243	Unigene0010511	Unigene0013352	Unigene0016874	Unigene0015569	Unigene0025402	Unigene0042520	Unigene0011822	Unigene0005260	Unigene0014189	Unigene0040028	Unigene0010463	0.00167895	0.0159789	0.105072	0.0319	0.3036
ORTHOMCL4749	Unigene0045141	Unigene0040466	Unigene0035529	Unigene0000989	Unigene0000160	Unigene0045664	Unigene0043053	Unigene0000518	Unigene0035651	Unigene0031375	Unigene0029636	0.00246842	0.0233684	0.105631	0.047	0.4439
ORTHOMCL9103	Unigene0034567	Unigene0024538	Unigene0010594	Unigene0033520	Unigene0015942	Unigene0024530	Unigene0013617	Unigene0041501	Unigene0034735	Unigene0031598	Unigene0004957	0.0014	0.0132421	0.105723	0.0267	0.2514
ORTHOMCL4677	Unigene0035318	Unigene0038006	Unigene0035277	Unigene0000161	Unigene0000405	Unigene0016713	Unigene0000142	Unigene0024216	Unigene0000126	Unigene0000519	Unigene0023094	0.00398421	0.0376	0.105963	0.0757	0.7144
ORTHOMCL10166	Unigene0038126	Unigene0038239	Unigene0018957	Unigene0016235	Unigene0027154	Unigene0009369	Unigene0025649	Unigene0016092	Unigene0032314	Unigene0009821	Unigene0037375	0.00148421	0.014	0.106015	0.0285	0.2663
ORTHOMCL10833	Unigene0022494	Unigene0039103	Unigene0040379	Unigene0032751	Unigene0024427	Unigene0026921	Unigene0026595	Unigene0045402	Unigene0034040	Unigene0020937	Unigene0018596	0.0111947	0.105468	0.106143	0.2126	2.0041
ORTHOMCL5139	Unigene0037559	Unigene0000439	Unigene0032004	Unigene0002999	Unigene0041625	Unigene0016717	Unigene0030707	Unigene0041966	Unigene0009607	Unigene0048912	Unigene0004879	0.000821053	0.00772632	0.106267	0.0156	0.1469
ORTHOMCL5840	Unigene0043200	Unigene0007946	Unigene0032153	Unigene0031903	Unigene0026244	Unigene0023345	Unigene0009594	Unigene0047550	Unigene0001333	Unigene0021360	Unigene0017640	0.00196842	0.0184579	0.106644	0.037	0.3508
ORTHOMCL8426	Unigene0003743	Unigene0037033	Unigene0009309	Unigene0009334	Unigene0006698	Unigene0018568	Unigene0006015	Unigene0004246	Unigene0003885	Unigene0007766	Unigene0038759	0.000363158	0.00340526	0.106646	0.0069	0.0648
ORTHOMCL7953	Unigene0024040	Unigene0003160	Unigene0020124	Unigene0030268	Unigene0027765	Unigene0004722	Unigene0025200	Unigene0041240	Unigene0040420	Unigene0014942	Unigene0031863	0.000594737	0.00557368	0.106704	0.0113	0.1059
ORTHOMCL8029	Unigene0038548	Unigene0035917	Unigene0021963	Unigene0038855	Unigene0005171	Unigene0011301	Unigene0014124	Unigene0004807	Unigene0011532	Unigene0003257	Unigene0033784	0.00264737	0.0248053	0.106726	0.0505	0.4714
ORTHOMCL10078	Unigene0040798	Unigene0008600	Unigene0032296	Unigene0029150	Unigene0016284	Unigene0021833	Unigene0036775	Unigene0044078	Unigene0016436	Unigene0020949	Unigene0026879	0.000815789	0.00764211	0.106749	0.0156	0.1454
ORTHOMCL7778	Unigene0027928	Unigene0011805	Unigene0041280	Unigene0036641	Unigene0044053	Unigene0041356	Unigene0043890	Unigene0035467	Unigene0031237	Unigene0002989	Unigene0037051	0.000568421	0.00532105	0.106825	0.0108	0.1012
ORTHOMCL8571	Unigene0012018	Unigene0013023	Unigene0005243	Unigene0017290	Unigene0005092	Unigene0030229	Unigene0007634	Unigene0011624	Unigene0015484	Unigene0008176	Unigene0003949	0.00169474	0.0158526	0.106906	0.0325	0.3012
ORTHOMCL6722	Unigene0007937	Unigene0035107	Unigene0031220	Unigene0036372	Unigene0046322	Unigene0009779	Unigene0002004	Unigene0018215	Unigene0009725	Unigene0003697	Unigene0028546	0.00291053	0.0272	0.107005	0.0554	0.5168
ORTHOMCL5304	Unigene0006564	Unigene0033085	Unigene0034244	Unigene0016014	Unigene0022270	Unigene0011536	Unigene0020681	Unigene0000594	Unigene0033008	Unigene0023246	Unigene0033977	0.00311053	0.0289895	0.107298	0.0591	0.5507
ORTHOMCL9374	Unigene0039131	Unigene0036132	Unigene0021696	Unigene0015695	Unigene0047570	Unigene0005649	Unigene0024258	Unigene0044533	Unigene0035031	Unigene0047170	Unigene0031180	0.000742105	0.00686316	0.108129	0.0141	0.1305
ORTHOMCL8837	Unigene0022412	Unigene0023520	Unigene0023051	Unigene0013330	Unigene0004432	Unigene0034854	Unigene0047895	Unigene0043665	Unigene0030827	Unigene0039821	Unigene0031844	0.00292632	0.0270526	0.108171	0.0556	0.5141
ORTHOMCL5105	Unigene0037271	Unigene0011100	Unigene0035299	Unigene0004164	Unigene0007242	Unigene0000414	Unigene0023760	Unigene0025284	Unigene0038628	Unigene0015995	Unigene0032925	0.0032	0.0295316	0.108359	0.0608	0.5611
ORTHOMCL4704	Unigene0007081	Unigene0039335	Unigene0030930	Unigene0032225	Unigene0035085	Unigene0000137	Unigene0045848	Unigene0000577	Unigene0038713	Unigene0048112	Unigene0033289	0.00243158	0.0224368	0.108374	0.046	0.4264
ORTHOMCL5747	Unigene0042161	Unigene0012564	Unigene0001437	Unigene0006656	Unigene0020270	Unigene0031146	Unigene0004699	Unigene0033570	Unigene0040665	Unigene0001241	Unigene0017500	0.000742105	0.00684211	0.108462	0.0141	0.13
ORTHOMCL7959	Unigene0014586	Unigene0033137	Unigene0008864	Unigene0020105	Unigene0007440	Unigene0016310	Unigene0044665	Unigene0017888	Unigene0003167	Unigene0015334	Unigene0022055	0.0018	0.0165895	0.108503	0.0342	0.315
ORTHOMCL9896	Unigene0016494	Unigene0027317	Unigene0020974	Unigene0007624	Unigene0028442	Unigene0028855	Unigene0025908	Unigene0031029	Unigene0024941	Unigene0016666	Unigene0017084	0.00152105	0.0140158	0.108524	0.029	0.2662
ORTHOMCL7597	Unigene0010117	Unigene0036385	Unigene0042168	Unigene0036616	Unigene0002776	Unigene0046591	Unigene0020352	Unigene0046031	Unigene0017465	Unigene0032054	Unigene0037431	0.00251579	0.0231684	0.108587	0.0477	0.4402
ORTHOMCL7112	Unigene0037450	Unigene0034936	Unigene0019460	Unigene0037252	Unigene0040601	Unigene0040706	Unigene0002332	Unigene0042030	Unigene0017930	Unigene0030046	Unigene0030303	0.00302105	0.0277421	0.108898	0.0574	0.527
ORTHOMCL6199	Unigene0027669	Unigene0024141	Unigene0022486	Unigene0031354	Unigene0045463	Unigene0003034	Unigene0001597	Unigene0042414	Unigene0035851	Unigene0022582	Unigene0013944	0.000636842	0.00584737	0.108911	0.012	0.1112
ORTHOMCL8793	Unigene0007025	Unigene0004351	Unigene0004902	Unigene0005683	Unigene0014783	Unigene0011723	Unigene0010023	Unigene0029033	Unigene0017142	Unigene0015001	Unigene0016719	0.00156842	0.0144	0.108918	0.0297	0.2737
ORTHOMCL9255	Unigene0040921	Unigene0040042	Unigene0026390	Unigene0029051	Unigene0037267	Unigene0005694	Unigene0015355	Unigene0005285	Unigene0011319	Unigene0022376	Unigene0023187	0.00105263	0.00964737	0.109111	0.0199	0.1834
ORTHOMCL10350	Unigene0019819	Unigene0039874	Unigene0026435	Unigene0034238	Unigene0022301	Unigene0012000	Unigene0044899	Unigene0041836	Unigene0014981	Unigene0015965	Unigene0010878	0.000931579	0.00853684	0.109125	0.0176	0.1623
ORTHOMCL9017	Unigene0037493	Unigene0004781	Unigene0039798	Unigene0030224	Unigene0047110	Unigene0019629	Unigene0047674	Unigene0009349	Unigene0037260	Unigene0047689	Unigene0037593	0.00297895	0.0272895	0.109161	0.0564	0.5184
ORTHOMCL4637	Unigene0033148	Unigene0000106	Unigene0039304	Unigene0016757	Unigene0047331	Unigene0036986	Unigene0041826	Unigene0009048	Unigene0033264	Unigene0040983	Unigene0028972	0.00335263	0.0307105	0.109169	0.0636	0.5835
ORTHOMCL10700	Unigene0038073	Unigene0037276	Unigene0023600	Unigene0021350	Unigene0029136	Unigene0041135	Unigene0015584	Unigene0040662	Unigene0018078	Unigene0044581	Unigene0020372	0.00293684	0.0269	0.109176	0.0558	0.5111
ORTHOMCL4977	Unigene0000304	Unigene0005970	Unigene0015645	Unigene0037710	Unigene0026058	Unigene0008266	Unigene0041716	Unigene0007013	Unigene0042407	Unigene0039338	Unigene0002123	0.0394789	0.361584	0.109183	0.7501	6.8701
ORTHOMCL5153	Unigene0000448	Unigene0033470	Unigene0016633	Unigene0031934	Unigene0041151	Unigene0031885	Unigene0048246	Unigene0040415	Unigene0036313	Unigene0025922	Unigene0031215	0.00227368	0.0208211	0.109201	0.0432	0.3954
ORTHOMCL9563	Unigene0036776	Unigene0033517	Unigene0041786	Unigene0037347	Unigene0009193	Unigene0006287	Unigene0044575	Unigene0042285	Unigene0034876	Unigene0045137	Unigene0020838	0.000636842	0.00583158	0.109206	0.0122	0.1107
ORTHOMCL9780	Unigene0007097	Unigene0035403	Unigene0011984	Unigene0040482	Unigene0044841	Unigene0008875	Unigene0013937	Unigene0026554	Unigene0019014	Unigene0010519	Unigene0036943	0.00169474	0.0155158	0.109227	0.0323	0.2948
ORTHOMCL6420	Unigene0031290	Unigene0009615	Unigene0003941	Unigene0033275	Unigene0004017	Unigene0005991	Unigene0001762	Unigene0044252	Unigene0034013	Unigene0048840	Unigene0008771	0.000510526	0.00466316	0.109481	0.0096	0.0886
ORTHOMCL7930	Unigene0003651	Unigene0019099	Unigene0004833	Unigene0038104	Unigene0047117	Unigene0042758	Unigene0027212	Unigene0003134	Unigene0011598	Unigene0004121	Unigene0022072	0.00105263	0.00961053	0.109529	0.0201	0.1827
ORTHOMCL8797	Unigene0004361	Unigene0041194	Unigene0040057	Unigene0005665	Unigene0019593	Unigene0039696	Unigene0037193	Unigene0006358	Unigene0040425	Unigene0046337	Unigene0033532	0.00418947	0.0382316	0.109581	0.0796	0.7263
ORTHOMCL6495	Unigene0005460	Unigene0034442	Unigene0008026	Unigene0036148	Unigene0045497	Unigene0023590	Unigene0001816	Unigene0008308	Unigene0040176	Unigene0011317	Unigene0008057	0.000678947	0.00619474	0.109601	0.0129	0.1176
ORTHOMCL10545	Unigene0017983	Unigene0034885	Unigene0016472	Unigene0021963	Unigene0013062	Unigene0038270	Unigene0024238	Unigene0014032	Unigene0022681	Unigene0040695	Unigene0019505	0.00375789	0.0342684	0.109661	0.0714	0.6512
ORTHOMCL9030	Unigene0009194	Unigene0033176	Unigene0037403	Unigene0034217	Unigene0042101	Unigene0041537	Unigene0027450	Unigene0004802	Unigene0033448	Unigene0046275	Unigene0036628	0.00167895	0.0153053	0.109697	0.0319	0.2907
ORTHOMCL9706	Unigene0039192	Unigene0007411	Unigene0038291	Unigene0008517	Unigene0047162	Unigene0011463	Unigene0045027	Unigene0019692	Unigene0006780	Unigene0047966	Unigene0033945	0.00308421	0.0280842	0.10982	0.0586	0.5337
ORTHOMCL8001	Unigene0042234	Unigene0004977	Unigene0041027	Unigene0040332	Unigene0003219	Unigene0039765	Unigene0042846	Unigene0042954	Unigene0041297	Unigene0007234	Unigene0036120	0.0008	0.00727368	0.109986	0.015	0.1384
ORTHOMCL6644	Unigene0001942	Unigene0035972	Unigene0030483	Unigene0027026	Unigene0036773	Unigene0033561	Unigene0044642	Unigene0043295	Unigene0031104	Unigene0042376	Unigene0027477	0.00105789	0.00960526	0.110137	0.0201	0.1824
ORTHOMCL6292	Unigene0043505	Unigene0001664	Unigene0041470	Unigene0033648	Unigene0001923	Unigene0001671	Unigene0017564	Unigene0030838	Unigene0035147	Unigene0016264	Unigene0017231	0.00337895	0.0305895	0.110461	0.0642	0.5812
ORTHOMCL9871	Unigene0007505	Unigene0030802	Unigene0036313	Unigene0032736	Unigene0042136	Unigene0045274	Unigene0047640	Unigene0031249	Unigene0032734	Unigene0027885	Unigene0039733	0.00206842	0.0186895	0.110673	0.0394	0.3551
ORTHOMCL9745	Unigene0037652	Unigene0017008	Unigene0008064	Unigene0020749	Unigene0025483	Unigene0021403	Unigene0020876	Unigene0018521	Unigene0016827	Unigene0020323	Unigene0006927	0.00198421	0.0179263	0.110687	0.0378	0.3407
ORTHOMCL5098	Unigene0000408	Unigene0002449	Unigene0020371	Unigene0032993	Unigene0016074	Unigene0000435	Unigene0044784	Unigene0027746	Unigene0041992	Unigene0046367	Unigene0022719	0.00316316	0.0285737	0.110702	0.0601	0.543
ORTHOMCL9486	Unigene0043433	Unigene0033310	Unigene0015139	Unigene0017900	Unigene0005996	Unigene0025364	Unigene0041874	Unigene0042898	Unigene0040754	Unigene0030961	Unigene0024067	0.000478947	0.00432105	0.11084	0.0092	0.0822
ORTHOMCL10929	Unigene0041152	Unigene0023004	Unigene0023691	Unigene0030279	Unigene0045370	Unigene0027910	Unigene0025564	Unigene0043036	Unigene0033725	Unigene0025137	Unigene0029748	0.00181053	0.0163211	0.110932	0.0344	0.3104
ORTHOMCL5120	Unigene0039444	Unigene0000424	Unigene0011129	Unigene0030946	Unigene0043708	Unigene0023947	Unigene0047108	Unigene0010360	Unigene0033081	Unigene0028321	Unigene0003094	0.00264211	0.0238158	0.110939	0.0502	0.4524
ORTHOMCL4875	Unigene0044317	Unigene0000236	Unigene0034624	Unigene0004227	Unigene0005604	Unigene0009386	Unigene0016075	Unigene0005375	Unigene0018096	Unigene0020198	Unigene0000437	0.000815789	0.00734737	0.111032	0.0153	0.1396
ORTHOMCL10057	Unigene0039649	Unigene0013657	Unigene0008451	Unigene0011427	Unigene0045083	Unigene0042814	Unigene0045480	Unigene0009047	Unigene0040449	Unigene0022401	Unigene0021140	0.0022	0.0198105	0.111052	0.0418	0.3763
ORTHOMCL6819	Unigene0002790	Unigene0013791	Unigene0040434	Unigene0034750	Unigene0046351	Unigene0042800	Unigene0002071	Unigene0024162	Unigene0015685	Unigene0030731	Unigene0032353	0.0006	0.0054	0.111111	0.0114	0.1027
ORTHOMCL9742	Unigene0013297	Unigene0011640	Unigene0031594	Unigene0017055	Unigene0021374	Unigene0011529	Unigene0032098	Unigene0006920	Unigene0020466	Unigene0019495	Unigene0015744	0.000626316	0.00563684	0.111111	0.012	0.1072
ORTHOMCL4731	Unigene0028678	Unigene0033495	Unigene0013202	Unigene0033336	Unigene0003360	Unigene0000154	Unigene0005011	Unigene0029326	Unigene0014248	Unigene0031891	Unigene0010506	0.00181579	0.0163316	0.111183	0.0345	0.3103
ORTHOMCL6544	Unigene0001853	Unigene0005667	Unigene0003783	Unigene0026638	Unigene0041721	Unigene0038056	Unigene0036169	Unigene0006870	Unigene0012423	Unigene0008116	Unigene0027675	0.000752632	0.00676316	0.111284	0.0143	0.1284
ORTHOMCL4581	Unigene0001580	Unigene0032855	Unigene0001049	Unigene0000977	Unigene0001002	Unigene0000190	Unigene0000209	Unigene0022666	Unigene0032367	Unigene0000082	Unigene0000961	0.00277895	0.0249579	0.111345	0.0527	0.4742
ORTHOMCL7378	Unigene0002577	Unigene0015533	Unigene0014980	Unigene0020649	Unigene0006650	Unigene0043483	Unigene0031748	Unigene0012254	Unigene0008702	Unigene0015231	Unigene0028739	0.00313158	0.0280684	0.111569	0.0594	0.5333
ORTHOMCL10066	Unigene0032805	Unigene0039517	Unigene0021490	Unigene0025020	Unigene0032215	Unigene0034238	Unigene0015389	Unigene0047618	Unigene0008492	Unigene0027003	Unigene0020171	0.000536842	0.0048	0.111842	0.0102	0.0912
ORTHOMCL7223	Unigene0018637	Unigene0037362	Unigene0036272	Unigene0034962	Unigene0047918	Unigene0041013	Unigene0002426	Unigene0015890	Unigene0020484	Unigene0030992	Unigene0031646	0.00156316	0.0139684	0.111907	0.0297	0.2655
ORTHOMCL8506	Unigene0024214	Unigene0014179	Unigene0027584	Unigene0005656	Unigene0025608	Unigene0040991	Unigene0043497	Unigene0006322	Unigene0040075	Unigene0003860	Unigene0013802	0.00318421	0.0284526	0.111913	0.0606	0.5407
ORTHOMCL8047	Unigene0043530	Unigene0015957	Unigene0029558	Unigene0040930	Unigene0047652	Unigene0005394	Unigene0004318	Unigene0046725	Unigene0003272	Unigene0048210	Unigene0003309	0.00322105	0.0287684	0.111965	0.0613	0.5466
ORTHOMCL5933	Unigene0004090	Unigene0015797	Unigene0001401	Unigene0038195	Unigene0001619	Unigene0044398	Unigene0028644	Unigene0045164	Unigene0036673	Unigene0005212	Unigene0003837	0.00146842	0.0131	0.112093	0.0279	0.2489
ORTHOMCL9569	Unigene0007693	Unigene0039329	Unigene0011183	Unigene0034758	Unigene0014194	Unigene0040196	Unigene0044786	Unigene0006299	Unigene0040591	Unigene0019995	Unigene0019171	0.00248947	0.0221947	0.112165	0.0474	0.4217
ORTHOMCL10190	Unigene0024744	Unigene0016249	Unigene0027066	Unigene0017772	Unigene0009521	Unigene0038661	Unigene0011614	Unigene0041408	Unigene0025504	Unigene0040173	Unigene0014065	0.00113158	0.0100842	0.112213	0.0215	0.1917
ORTHOMCL6926	Unigene0042463	Unigene0034537	Unigene0041355	Unigene0038869	Unigene0042704	Unigene0015696	Unigene0045539	Unigene0044989	Unigene0002162	Unigene0004840	Unigene0037553	0.000752632	0.00670526	0.112245	0.0143	0.1277
ORTHOMCL5978	Unigene0009257	Unigene0030812	Unigene0008566	Unigene0040001	Unigene0001431	Unigene0040245	Unigene0002777	Unigene0011526	Unigene0039795	Unigene0003674	Unigene0012248	0.000568421	0.00506316	0.112266	0.0108	0.096
ORTHOMCL10270	Unigene0037801	Unigene0037441	Unigene0023499	Unigene0021121	Unigene0010195	Unigene0033027	Unigene0010485	Unigene0011047	Unigene0037924	Unigene0046750	Unigene0018344	0.00237368	0.0211053	0.112469	0.0452	0.401
ORTHOMCL8943	Unigene0004615	Unigene0007862	Unigene0029144	Unigene0033331	Unigene0030877	Unigene0043858	Unigene0042653	Unigene0038630	Unigene0032165	Unigene0045923	Unigene0034686	0.000631579	0.00560526	0.112676	0.0118	0.1065
ORTHOMCL10695	Unigene0025826	Unigene0015815	Unigene0031255	Unigene0015544	Unigene0032998	Unigene0018337	Unigene0043999	Unigene0038726	Unigene0028840	Unigene0017472	Unigene0017173	0.00358421	0.0317158	0.11301	0.0682	0.6026
ORTHOMCL5059	Unigene0005173	Unigene0041396	Unigene0018431	Unigene0005390	Unigene0026089	Unigene0014459	Unigene0035610	Unigene0000366	Unigene0036689	Unigene0018600	Unigene0017154	0.00253158	0.0223789	0.113123	0.0481	0.4251
ORTHOMCL5078	Unigene0002480	Unigene0032791	Unigene0010261	Unigene0035073	Unigene0044772	Unigene0000445	Unigene0037850	Unigene0000389	Unigene0026688	Unigene0023000	Unigene0035559	0.00107895	0.00953158	0.113197	0.0205	0.181
ORTHOMCL6838	Unigene0039205	Unigene0035018	Unigene0005545	Unigene0016740	Unigene0045385	Unigene0041021	Unigene0040369	Unigene0043637	Unigene0042269	Unigene0002086	Unigene0015139	0.00137895	0.0121789	0.113224	0.0262	0.2315
ORTHOMCL4572	Unigene0045789	Unigene0033124	Unigene0000620	Unigene0024000	Unigene0045250	Unigene0044096	Unigene0016943	Unigene0000460	Unigene0005188	Unigene0000078	Unigene0040033	0.00482105	0.0425684	0.113254	0.0916	0.8087
ORTHOMCL4760	Unigene0045090	Unigene0005426	Unigene0035385	Unigene0018900	Unigene0004181	Unigene0002882	Unigene0041628	Unigene0040929	Unigene0000167	Unigene0047249	Unigene0029093	0.00308421	0.0271895	0.113434	0.0587	0.5166
ORTHOMCL4614	Unigene0016627	Unigene0013915	Unigene0000244	Unigene0008118	Unigene0019076	Unigene0046548	Unigene0047803	Unigene0006997	Unigene0041354	Unigene0000095	Unigene0001240	0.000568421	0.00501053	0.113445	0.0109	0.0953
ORTHOMCL8023	Unigene0024266	Unigene0029174	Unigene0003246	Unigene0040620	Unigene0019810	Unigene0006388	Unigene0045736	Unigene0044930	Unigene0030925	Unigene0003404	Unigene0036428	0.00158947	0.0139737	0.113748	0.03	0.2655
ORTHOMCL10801	Unigene0043371	Unigene0019615	Unigene0042555	Unigene0034694	Unigene0017947	Unigene0033370	Unigene0037101	Unigene0018700	Unigene0022251	Unigene0046423	Unigene0030327	0.00131579	0.0115632	0.113792	0.025	0.2197
ORTHOMCL9928	Unigene0045926	Unigene0010422	Unigene0010865	Unigene0020582	Unigene0017688	Unigene0012830	Unigene0007754	Unigene0045157	Unigene0023888	Unigene0020158	Unigene0014222	0.00158947	0.0139579	0.113876	0.0302	0.2653
ORTHOMCL5176	Unigene0006301	Unigene0000468	Unigene0009289	Unigene0039785	Unigene0048010	Unigene0045365	Unigene0044606	Unigene0009621	Unigene0019236	Unigene0010426	Unigene0035098	0.00334211	0.0292842	0.114127	0.0633	0.5563
ORTHOMCL9643	Unigene0006531	Unigene0014934	Unigene0009445	Unigene0027177	Unigene0043221	Unigene0015706	Unigene0014392	Unigene0042048	Unigene0028418	Unigene0012000	Unigene0026917	0.000963158	0.00843684	0.114161	0.0183	0.1606
ORTHOMCL7279	Unigene0008464	Unigene0004358	Unigene0026534	Unigene0019627	Unigene0032078	Unigene0002488	Unigene0045566	Unigene0021449	Unigene0038893	Unigene0048897	Unigene0005435	0.000536842	0.0047	0.114222	0.0103	0.0892
ORTHOMCL4408	Unigene0000798	Unigene0031517	Unigene0000017	Unigene0000865	Unigene0041837	Unigene0026960	Unigene0000146	Unigene0000461	Unigene0014153	Unigene0009021	Unigene0029014	0.00212105	0.0185684	0.114229	0.0404	0.3527
ORTHOMCL5160	Unigene0032773	Unigene0000453	Unigene0029969	Unigene0026013	Unigene0037336	Unigene0037350	Unigene0045644	Unigene0003807	Unigene0030189	Unigene0014977	Unigene0024703	0.000636842	0.00556842	0.114367	0.0122	0.1058
ORTHOMCL6240	Unigene0046039	Unigene0041612	Unigene0028027	Unigene0001667	Unigene0046152	Unigene0001629	Unigene0025329	Unigene0045418	Unigene0034626	Unigene0025335	Unigene0013916	0.00155263	0.0135737	0.114385	0.0296	0.2579
ORTHOMCL4442	Unigene0037726	Unigene0000167	Unigene0000718	Unigene0000961	Unigene0041304	Unigene0000709	Unigene0000501	Unigene0041944	Unigene0019964	Unigene0000038	Unigene0000030	0.00270526	0.0236368	0.114451	0.0514	0.4491
ORTHOMCL7122	Unigene0041692	Unigene0003756	Unigene0002344	Unigene0002588	Unigene0046018	Unigene0044045	Unigene0045821	Unigene0045863	Unigene0040494	Unigene0047582	Unigene0002948	0.000778947	0.00680526	0.114462	0.0148	0.1292
ORTHOMCL5580	Unigene0026652	Unigene0036943	Unigene0005433	Unigene0001070	Unigene0027750	Unigene0045204	Unigene0044976	Unigene0016980	Unigene0008697	Unigene0008847	Unigene0035346	0.00185263	0.0161789	0.114509	0.0352	0.3073
ORTHOMCL4401	Unigene0027011	Unigene0035412	Unigene0000239	Unigene0000015	Unigene0000111	Unigene0000020	Unigene0005718	Unigene0003903	Unigene0033366	Unigene0044428	Unigene0032537	0.00268421	0.0234	0.11471	0.051	0.4445
ORTHOMCL7966	Unigene0039027	Unigene0006870	Unigene0005697	Unigene0021639	Unigene0045033	Unigene0012943	Unigene0015322	Unigene0008142	Unigene0003175	Unigene0005826	Unigene0008299	0.000689474	0.00601053	0.114711	0.0131	0.1142
ORTHOMCL5980	Unigene0022226	Unigene0013071	Unigene0005840	Unigene0009984	Unigene0001432	Unigene0004931	Unigene0039990	Unigene0038494	Unigene0027095	Unigene0002997	Unigene0006261	0.000589474	0.00513684	0.114754	0.0113	0.0975
ORTHOMCL6775	Unigene0026376	Unigene0028892	Unigene0011026	Unigene0031786	Unigene0042561	Unigene0044794	Unigene0002039	Unigene0017847	Unigene0034198	Unigene0020556	Unigene0004675	0.00139474	0.0121421	0.114868	0.0264	0.2308
ORTHOMCL7941	Unigene0037584	Unigene0037091	Unigene0034473	Unigene0028608	Unigene0003147	Unigene0041970	Unigene0041954	Unigene0016534	Unigene0009026	Unigene0029494	Unigene0029641	0.00291053	0.0253053	0.115017	0.0556	0.4807
ORTHOMCL8032	Unigene0042059	Unigene0033905	Unigene0038549	Unigene0021820	Unigene0046509	Unigene0005651	Unigene0003260	Unigene0042771	Unigene0019533	Unigene0047167	Unigene0007764	0.00119474	0.0103842	0.115053	0.0227	0.1974
ORTHOMCL8440	Unigene0039864	Unigene0034358	Unigene0040121	Unigene0037561	Unigene0009149	Unigene0013965	Unigene0020728	Unigene0019528	Unigene0003766	Unigene0008604	Unigene0033588	0.00211053	0.0183158	0.11523	0.0399	0.3481
ORTHOMCL5119	Unigene0001612	Unigene0003598	Unigene0037377	Unigene0016926	Unigene0026157	Unigene0000423	Unigene0000453	Unigene0045594	Unigene0023323	Unigene0013197	Unigene0030059	0.00243158	0.0210737	0.115385	0.0462	0.4004
ORTHOMCL8836	Unigene0038079	Unigene0004429	Unigene0026893	Unigene0035992	Unigene0032718	Unigene0030984	Unigene0010475	Unigene0042553	Unigene0024038	Unigene0031646	Unigene0032040	0.00321053	0.0278211	0.115399	0.061	0.5286
ORTHOMCL4429	Unigene0001141	Unigene0019960	Unigene0000437	Unigene0036552	Unigene0000145	Unigene0008926	Unigene0027886	Unigene0009513	Unigene0032823	Unigene0000025	Unigene0005615	0.00163684	0.0141684	0.115527	0.0311	0.2691
ORTHOMCL6530	Unigene0017581	Unigene0019712	Unigene0001842	Unigene0038170	Unigene0046876	Unigene0002191	Unigene0037755	Unigene0040465	Unigene0021791	Unigene0044769	Unigene0019411	0.00129474	0.0112053	0.115547	0.0244	0.2128
ORTHOMCL6239	Unigene0004234	Unigene0036429	Unigene0035359	Unigene0037635	Unigene0046247	Unigene0002572	Unigene0044770	Unigene0035617	Unigene0001629	Unigene0036237	Unigene0035163	0.00460526	0.0398526	0.115557	0.0875	0.7572
ORTHOMCL6362	Unigene0014445	Unigene0009124	Unigene0003470	Unigene0001721	Unigene0006591	Unigene0005068	Unigene0008008	Unigene0003667	Unigene0041743	Unigene0006192	Unigene0002470	0.000605263	0.00523684	0.115578	0.0115	0.0998
ORTHOMCL9119	Unigene0035081	Unigene0020622	Unigene0029867	Unigene0005745	Unigene0046316	Unigene0027217	Unigene0025527	Unigene0012514	Unigene0022146	Unigene0004992	Unigene0009004	0.000489474	0.00423158	0.115672	0.0095	0.0804
ORTHOMCL6190	Unigene0040407	Unigene0036890	Unigene0035780	Unigene0014283	Unigene0024218	Unigene0010274	Unigene0001589	Unigene0020097	Unigene0004832	Unigene0045656	Unigene0032395	0.00107368	0.00927895	0.115712	0.0205	0.1763
ORTHOMCL6232	Unigene0011336	Unigene0007132	Unigene0023131	Unigene0020985	Unigene0001624	Unigene0008807	Unigene0019399	Unigene0024504	Unigene0012327	Unigene0029393	Unigene0019747	0.00371053	0.0320526	0.115764	0.0704	0.609
ORTHOMCL10025	Unigene0038842	Unigene0035258	Unigene0032346	Unigene0026000	Unigene0016999	Unigene0037333	Unigene0035520	Unigene0008294	Unigene0028318	Unigene0018507	Unigene0024690	0.000631579	0.00545263	0.11583	0.0119	0.1034
ORTHOMCL5087	Unigene0000397	Unigene0040154	Unigene0034691	Unigene0026404	Unigene0041561	Unigene0004118	Unigene0045154	Unigene0002342	Unigene0020270	Unigene0045388	Unigene0029466	0.00361053	0.0311684	0.115839	0.0686	0.5923
ORTHOMCL8645	Unigene0028513	Unigene0035561	Unigene0014776	Unigene0010479	Unigene0026754	Unigene0004056	Unigene0031426	Unigene0018954	Unigene0032832	Unigene0017578	Unigene0027510	0.00583684	0.0503158	0.116004	0.1108	0.956
ORTHOMCL4520	Unigene0001798	Unigene0005695	Unigene0035983	Unigene0000059	Unigene0000183	Unigene0000097	Unigene0016049	Unigene0000532	Unigene0024657	Unigene0031343	Unigene0026821	0.00426316	0.0367263	0.116079	0.081	0.6978
ORTHOMCL10337	Unigene0044042	Unigene0033467	Unigene0020795	Unigene0019558	Unigene0044557	Unigene0020296	Unigene0012311	Unigene0047800	Unigene0019622	Unigene0010759	Unigene0018581	0.000773684	0.00666316	0.116114	0.0149	0.1268
ORTHOMCL4565	Unigene0000724	Unigene0000076	Unigene0000191	Unigene0000143	Unigene0000443	Unigene0000903	Unigene0000233	Unigene0001546	Unigene0000381	Unigene0000096	Unigene0000506	0.00154211	0.0132789	0.116132	0.0293	0.2525
ORTHOMCL6547	Unigene0043823	Unigene0010801	Unigene0008012	Unigene0001857	Unigene0012594	Unigene0003674	Unigene0008535	Unigene0015562	Unigene0006742	Unigene0006555	Unigene0003731	0.000657895	0.00566316	0.116171	0.0127	0.1078
ORTHOMCL9685	Unigene0038315	Unigene0006707	Unigene0014143	Unigene0035282	Unigene0029310	Unigene0028863	Unigene0034930	Unigene0027704	Unigene0032763	Unigene0044764	Unigene0029103	0.000615789	0.00529474	0.116302	0.0117	0.1007
ORTHOMCL9480	Unigene0040918	Unigene0032888	Unigene0019450	Unigene0041028	Unigene0046190	Unigene0026910	Unigene0005974	Unigene0042246	Unigene0007324	Unigene0024301	Unigene0005975	0.00194737	0.0167368	0.116352	0.037	0.3179
ORTHOMCL9072	Unigene0030356	Unigene0026071	Unigene0038631	Unigene0034036	Unigene0042479	Unigene0004890	Unigene0018248	Unigene0041171	Unigene0027853	Unigene0006953	Unigene0031676	0.00362632	0.0311632	0.116365	0.0687	0.5921
ORTHOMCL4762	Unigene0033288	Unigene0022910	Unigene0042763	Unigene0038839	Unigene0020489	Unigene0038058	Unigene0005732	Unigene0000168	Unigene0039890	Unigene0034609	Unigene0003329	0.00380526	0.0326895	0.116406	0.0722	0.6213
ORTHOMCL8518	Unigene0031338	Unigene0032537	Unigene0017417	Unigene0010850	Unigene0014158	Unigene0003874	Unigene0045529	Unigene0029666	Unigene0039391	Unigene0048148	Unigene0012354	0.000889474	0.00763684	0.116471	0.0168	0.145
ORTHOMCL9301	Unigene0022230	Unigene0038141	Unigene0039258	Unigene0032005	Unigene0012119	Unigene0027028	Unigene0031232	Unigene0024372	Unigene0005776	Unigene0012500	Unigene0005412	0.000615789	0.00527895	0.11665	0.0117	0.1005
ORTHOMCL6010	Unigene0041402	Unigene0012011	Unigene0003584	Unigene0028044	Unigene0046558	Unigene0026194	Unigene0022328	Unigene0036889	Unigene0005872	Unigene0046606	Unigene0001459	0.0007	0.006	0.116667	0.0133	0.114
ORTHOMCL10908	Unigene0021369	Unigene0021501	Unigene0036330	Unigene0039765	Unigene0044813	Unigene0041639	Unigene0042015	Unigene0027485	Unigene0040567	Unigene0021622	Unigene0034706	0.00622632	0.0533579	0.11669	0.1182	1.0139
ORTHOMCL9867	Unigene0042481	Unigene0035024	Unigene0031163	Unigene0007487	Unigene0048012	Unigene0045515	Unigene0043697	Unigene0047324	Unigene0023587	Unigene0011167	Unigene0017771	0.000931579	0.00797895	0.116755	0.0177	0.1515
ORTHOMCL9271	Unigene0041983	Unigene0005339	Unigene0021852	Unigene0027601	Unigene0043775	Unigene0040815	Unigene0040645	Unigene0040447	Unigene0030603	Unigene0038622	Unigene0023961	0.000684211	0.00585789	0.116801	0.013	0.1114
ORTHOMCL6936	Unigene0006151	Unigene0002170	Unigene0015306	Unigene0002210	Unigene0020028	Unigene0006597	Unigene0047977	Unigene0046253	Unigene0037035	Unigene0004998	Unigene0009501	0.00145263	0.0124211	0.116949	0.0277	0.236
ORTHOMCL6065	Unigene0041228	Unigene0023428	Unigene0008450	Unigene0032477	Unigene0003240	Unigene0020367	Unigene0010221	Unigene0001497	Unigene0038143	Unigene0021193	Unigene0011171	0.00185263	0.0158105	0.117177	0.0352	0.3005
ORTHOMCL8031	Unigene0004731	Unigene0039435	Unigene0031319	Unigene0040752	Unigene0003260	Unigene0011166	Unigene0003514	Unigene0024021	Unigene0027425	Unigene0038179	Unigene0027029	0.00103158	0.00878947	0.117365	0.0196	0.1672
ORTHOMCL8860	Unigene0040664	Unigene0036293	Unigene0019256	Unigene0018610	Unigene0018834	Unigene0043399	Unigene0012861	Unigene0042423	Unigene0004476	Unigene0005271	Unigene0029159	0.0008	0.00681579	0.117375	0.0153	0.1295
ORTHOMCL6919	Unigene0010066	Unigene0002157	Unigene0025424	Unigene0009916	Unigene0045907	Unigene0013248	Unigene0028151	Unigene0015178	Unigene0003336	Unigene0035971	Unigene0014287	0.00151053	0.0128632	0.11743	0.0286	0.2445
ORTHOMCL10022	Unigene0031502	Unigene0008286	Unigene0042001	Unigene0017473	Unigene0040849	Unigene0044342	Unigene0025049	Unigene0042593	Unigene0034608	Unigene0023875	Unigene0019386	0.00252105	0.0214579	0.117488	0.048	0.4076
ORTHOMCL10858	Unigene0023749	Unigene0036323	Unigene0019488	Unigene0023071	Unigene0033347	Unigene0041393	Unigene0029135	Unigene0026768	Unigene0039474	Unigene0020108	Unigene0021575	0.0019	0.0161526	0.117628	0.0361	0.3068
ORTHOMCL10254	Unigene0036310	Unigene0040119	Unigene0038878	Unigene0032814	Unigene0043052	Unigene0046914	Unigene0034798	Unigene0040815	Unigene0020143	Unigene0030947	Unigene0010092	0.00262632	0.0223158	0.117689	0.05	0.4241
ORTHOMCL8354	Unigene0040963	Unigene0004712	Unigene0040497	Unigene0039341	Unigene0037853	Unigene0003639	Unigene0048058	Unigene0037320	Unigene0008727	Unigene0025385	Unigene0006149	0.000663158	0.00563158	0.117757	0.0126	0.1072
ORTHOMCL7881	Unigene0003076	Unigene0013248	Unigene0034709	Unigene0015570	Unigene0020735	Unigene0044976	Unigene0013523	Unigene0020849	Unigene0003961	Unigene0018151	Unigene0013989	0.000557895	0.00473684	0.117778	0.0107	0.0901
ORTHOMCL5675	Unigene0045936	Unigene0039765	Unigene0038081	Unigene0010404	Unigene0043376	Unigene0001174	Unigene0044459	Unigene0023138	Unigene0009540	Unigene0033783	Unigene0037001	0.00252632	0.0214474	0.117791	0.0479	0.4075
ORTHOMCL7822	Unigene0038658	Unigene0034084	Unigene0029894	Unigene0027001	Unigene0004926	Unigene0020602	Unigene0008233	Unigene0019971	Unigene0041867	Unigene0036513	Unigene0003033	0.000652632	0.00553684	0.117871	0.0125	0.1051
ORTHOMCL8427	Unigene0018774	Unigene0029194	Unigene0028771	Unigene0018513	Unigene0043406	Unigene0023283	Unigene0029475	Unigene0005129	Unigene0003744	Unigene0021624	Unigene0012312	0.00274211	0.0232421	0.11798	0.0522	0.4415
ORTHOMCL8004	Unigene0040390	Unigene0014223	Unigene0006611	Unigene0036571	Unigene0003223	Unigene0036106	Unigene0022313	Unigene0045204	Unigene0040228	Unigene0043955	Unigene0030959	0.00131053	0.0111053	0.118009	0.025	0.2111
ORTHOMCL6055	Unigene0039982	Unigene0002352	Unigene0026388	Unigene0014848	Unigene0025968	Unigene0032762	Unigene0001491	Unigene0041972	Unigene0033489	Unigene0029903	Unigene0009525	0.00133684	0.0113105	0.118195	0.0252	0.215
ORTHOMCL10241	Unigene0037287	Unigene0014337	Unigene0009959	Unigene0022339	Unigene0043156	Unigene0040182	Unigene0027943	Unigene0011885	Unigene0015374	Unigene0019788	Unigene0017665	0.00102632	0.00865263	0.118613	0.0195	0.1643
ORTHOMCL6985	Unigene0009655	Unigene0002211	Unigene0017976	Unigene0031809	Unigene0002941	Unigene0044780	Unigene0044322	Unigene0037623	Unigene0013082	Unigene0026806	Unigene0018731	0.00119474	0.0100684	0.118662	0.0227	0.1913
ORTHOMCL9947	Unigene0039390	Unigene0039603	Unigene0025154	Unigene0038713	Unigene0042211	Unigene0007910	Unigene0017404	Unigene0014496	Unigene0034315	Unigene0014032	Unigene0013771	0.00212632	0.0179158	0.118684	0.0405	0.3405
ORTHOMCL4379	Unigene0000937	Unigene0022057	Unigene0023078	Unigene0009197	Unigene0022631	Unigene0044718	Unigene0042105	Unigene0000007	Unigene0031181	Unigene0026543	Unigene0030228	0.00243684	0.0205263	0.118718	0.0463	0.3901
ORTHOMCL10148	Unigene0026120	Unigene0026194	Unigene0013314	Unigene0026691	Unigene0009133	Unigene0011890	Unigene0046794	Unigene0023653	Unigene0035090	Unigene0024449	Unigene0029570	0.00328421	0.0276632	0.118721	0.0625	0.5255
ORTHOMCL7843	Unigene0016399	Unigene0030895	Unigene0037184	Unigene0036350	Unigene0038409	Unigene0017114	Unigene0037972	Unigene0003044	Unigene0019031	Unigene0006635	Unigene0007381	0.00238947	0.0201263	0.118724	0.0455	0.3825
ORTHOMCL9134	Unigene0043047	Unigene0010320	Unigene0040826	Unigene0026288	Unigene0036451	Unigene0005017	Unigene0022567	Unigene0043928	Unigene0038401	Unigene0038352	Unigene0018314	0.00100526	0.00846316	0.118781	0.0191	0.1609
ORTHOMCL7435	Unigene0025656	Unigene0027519	Unigene0023143	Unigene0032667	Unigene0002630	Unigene0028414	Unigene0026762	Unigene0030563	Unigene0015408	Unigene0041469	Unigene0028947	0.00179474	0.0150947	0.118898	0.0341	0.2869
ORTHOMCL8145	Unigene0003384	Unigene0020590	Unigene0023111	Unigene0030254	Unigene0025112	Unigene0023054	Unigene0036822	Unigene0046867	Unigene0030197	Unigene0031215	Unigene0019914	0.000952632	0.00800526	0.119001	0.018	0.1522
ORTHOMCL10272	Unigene0044183	Unigene0028310	Unigene0026156	Unigene0010223	Unigene0046543	Unigene0043211	Unigene0012157	Unigene0024148	Unigene0016057	Unigene0036492	Unigene0026359	0.000915789	0.00769474	0.119015	0.0173	0.146
ORTHOMCL5376	Unigene0002970	Unigene0020973	Unigene0035960	Unigene0039529	Unigene0008430	Unigene0012226	Unigene0000731	Unigene0001140	Unigene0033632	Unigene0001132	Unigene0001031	0.00158421	0.0133	0.119114	0.0299	0.2526
ORTHOMCL8343	Unigene0025691	Unigene0037029	Unigene0023189	Unigene0021748	Unigene0007284	Unigene0008723	Unigene0042149	Unigene0023281	Unigene0036366	Unigene0008408	Unigene0003619	0.000789474	0.00662632	0.119142	0.015	0.126
ORTHOMCL6739	Unigene0044842	Unigene0041107	Unigene0031048	Unigene0024325	Unigene0015277	Unigene0004126	Unigene0044839	Unigene0002016	Unigene0016582	Unigene0012752	Unigene0003069	0.000621053	0.00521053	0.119192	0.0118	0.0989
ORTHOMCL7218	Unigene0002420	Unigene0030989	Unigene0042766	Unigene0040953	Unigene0047118	Unigene0004048	Unigene0002614	Unigene0047478	Unigene0017181	Unigene0045815	Unigene0038984	0.000584211	0.00488421	0.119612	0.0112	0.0929
ORTHOMCL8261	Unigene0040422	Unigene0035086	Unigene0034628	Unigene0010291	Unigene0041244	Unigene0041793	Unigene0028091	Unigene0043948	Unigene0003526	Unigene0025049	Unigene0032470	0.000705263	0.00589474	0.119643	0.0134	0.112
ORTHOMCL5143	Unigene0042678	Unigene0028965	Unigene0035912	Unigene0038534	Unigene0000911	Unigene0032637	Unigene0000442	Unigene0001540	Unigene0033959	Unigene0045521	Unigene0033671	0.00354211	0.0296053	0.119644	0.0674	0.5625
ORTHOMCL9623	Unigene0042756	Unigene0041964	Unigene0041370	Unigene0038442	Unigene0043329	Unigene0006447	Unigene0044730	Unigene0038656	Unigene0022807	Unigene0046010	Unigene0034334	0.00232105	0.0193632	0.11987	0.0441	0.368
ORTHOMCL7660	Unigene0043404	Unigene0020764	Unigene0036666	Unigene0004461	Unigene0007180	Unigene0002854	Unigene0006104	Unigene0028129	Unigene0022438	Unigene0004595	Unigene0009492	0.00256842	0.0214263	0.119872	0.0487	0.4071
ORTHOMCL8033	Unigene0029045	Unigene0034131	Unigene0022694	Unigene0006683	Unigene0003438	Unigene0042465	Unigene0003261	Unigene0004508	Unigene0036262	Unigene0018319	Unigene0032298	0.00200526	0.0167263	0.119887	0.0381	0.3178
ORTHOMCL6173	Unigene0001644	Unigene0003844	Unigene0016390	Unigene0019760	Unigene0021519	Unigene0042845	Unigene0044342	Unigene0033200	Unigene0001577	Unigene0026727	Unigene0039655	0.00217895	0.0181737	0.119896	0.0414	0.3454
ORTHOMCL6405	Unigene0006429	Unigene0040860	Unigene0039073	Unigene0040233	Unigene0027957	Unigene0046261	Unigene0015831	Unigene0024329	Unigene0033994	Unigene0001754	Unigene0002826	0.00134737	0.0112263	0.120019	0.0257	0.2133
ORTHOMCL4464	Unigene0001816	Unigene0000842	Unigene0004483	Unigene0000041	Unigene0000171	Unigene0001278	Unigene0042590	Unigene0000618	Unigene0010378	Unigene0035487	Unigene0003014	0.00613158	0.0510316	0.120153	0.1166	0.9695
ORTHOMCL4525	Unigene0028541	Unigene0019344	Unigene0001045	Unigene0000505	Unigene0002987	Unigene0024129	Unigene0020270	Unigene0013926	Unigene0010291	Unigene0001103	Unigene0000061	0.00223684	0.0186105	0.120192	0.0426	0.3538
ORTHOMCL5613	Unigene0031826	Unigene0001112	Unigene0039963	Unigene0020633	Unigene0025328	Unigene0021543	Unigene0019159	Unigene0001416	Unigene0035561	Unigene0023501	Unigene0017036	0.00190526	0.0158474	0.120226	0.0362	0.3011
ORTHOMCL8270	Unigene0039829	Unigene0038561	Unigene0037989	Unigene0038508	Unigene0010646	Unigene0041054	Unigene0042262	Unigene0046947	Unigene0003536	Unigene0044875	Unigene0033898	0.000652632	0.00542105	0.120388	0.0124	0.1029
ORTHOMCL8077	Unigene0020675	Unigene0011139	Unigene0010316	Unigene0010150	Unigene0027206	Unigene0018709	Unigene0014810	Unigene0042063	Unigene0033922	Unigene0003316	Unigene0036259	0.00483158	0.0401316	0.120393	0.0921	0.7627
ORTHOMCL10745	Unigene0016360	Unigene0019833	Unigene0043300	Unigene0019048	Unigene0020638	Unigene0038468	Unigene0034568	Unigene0018732	Unigene0031522	Unigene0037920	Unigene0019878	0.00118421	0.00983158	0.12045	0.0225	0.1869
ORTHOMCL9032	Unigene0040856	Unigene0009241	Unigene0033987	Unigene0004804	Unigene0022561	Unigene0041854	Unigene0030246	Unigene0032276	Unigene0025842	Unigene0031490	Unigene0014729	0.00159474	0.0132316	0.120525	0.0302	0.2515
ORTHOMCL10779	Unigene0022727	Unigene0033697	Unigene0034305	Unigene0032945	Unigene0018706	Unigene0022448	Unigene0040658	Unigene0034345	Unigene0025870	Unigene0017245	Unigene0029121	0.00157895	0.0130947	0.120579	0.0299	0.249
ORTHOMCL4805	Unigene0007043	Unigene0000916	Unigene0000199	Unigene0003268	Unigene0009717	Unigene0042966	Unigene0035271	Unigene0030256	Unigene0025625	Unigene0046695	Unigene0014449	0.00277895	0.0230368	0.120631	0.0527	0.4377
ORTHOMCL6471	Unigene0032126	Unigene0022199	Unigene0001796	Unigene0020320	Unigene0041699	Unigene0036756	Unigene0029775	Unigene0006525	Unigene0007307	Unigene0034994	Unigene0026792	0.000705263	0.00583684	0.12083	0.0137	0.111
ORTHOMCL9245	Unigene0033255	Unigene0026614	Unigene0011591	Unigene0006152	Unigene0015345	Unigene0015335	Unigene0012763	Unigene0019679	Unigene0041773	Unigene0005265	Unigene0015249	0.00127895	0.0105789	0.120896	0.0245	0.2009
ORTHOMCL4905	Unigene0000486	Unigene0040049	Unigene0030304	Unigene0019690	Unigene0000269	Unigene0011510	Unigene0033558	Unigene0045100	Unigene0000252	Unigene0023271	Unigene0016453	0.00316316	0.0261474	0.120974	0.0601	0.4969
ORTHOMCL10450	Unigene0042978	Unigene0036748	Unigene0017553	Unigene0021703	Unigene0013912	Unigene0011978	Unigene0018867	Unigene0045736	Unigene0018251	Unigene0026444	Unigene0014684	0.0021	0.0173368	0.121129	0.0398	0.3295
ORTHOMCL7203	Unigene0011443	Unigene0002409	Unigene0028585	Unigene0019852	Unigene0041671	Unigene0030915	Unigene0030830	Unigene0041601	Unigene0037046	Unigene0049365	Unigene0036767	0.00218421	0.0180316	0.121133	0.0416	0.3425
ORTHOMCL7563	Unigene0010203	Unigene0038137	Unigene0020664	Unigene0021298	Unigene0007253	Unigene0024669	Unigene0002751	Unigene0019307	Unigene0008439	Unigene0049283	Unigene0006912	0.00117895	0.00973158	0.121147	0.0224	0.1852
ORTHOMCL8841	Unigene0042739	Unigene0004445	Unigene0034117	Unigene0032321	Unigene0043648	Unigene0021048	Unigene0039366	Unigene0016811	Unigene0039382	Unigene0027970	Unigene0029067	0.00457368	0.0377474	0.121166	0.0868	0.7172
ORTHOMCL4396	Unigene0038307	Unigene0036952	Unigene0041939	Unigene0028494	Unigene0027368	Unigene0023647	Unigene0006882	Unigene0026748	Unigene0036870	Unigene0000013	Unigene0007579	0.00379474	0.0313105	0.121197	0.0721	0.595
ORTHOMCL5244	Unigene0038054	Unigene0015710	Unigene0004128	Unigene0009839	Unigene0004943	Unigene0014823	Unigene0000528	Unigene0005073	Unigene0019314	Unigene0044890	Unigene0039315	0.00217895	0.0179684	0.121265	0.0415	0.3414
ORTHOMCL9791	Unigene0007145	Unigene0039028	Unigene0019951	Unigene0019763	Unigene0034092	Unigene0026691	Unigene0046622	Unigene0030315	Unigene0036503	Unigene0035440	Unigene0022412	0.000626316	0.00516316	0.121305	0.0119	0.0981
ORTHOMCL5420	Unigene0023684	Unigene0040164	Unigene0035858	Unigene0036090	Unigene0019386	Unigene0007817	Unigene0013431	Unigene0000788	Unigene0018895	Unigene0047779	Unigene0011644	0.00225263	0.0185263	0.121591	0.043	0.3522
ORTHOMCL6570	Unigene0043121	Unigene0041019	Unigene0038823	Unigene0005004	Unigene0018880	Unigene0030848	Unigene0041888	Unigene0001880	Unigene0009327	Unigene0046470	Unigene0035485	0.00111579	0.00917368	0.121629	0.0213	0.1744
ORTHOMCL9789	Unigene0041320	Unigene0024251	Unigene0029352	Unigene0029660	Unigene0007136	Unigene0010054	Unigene0044453	Unigene0034131	Unigene0024510	Unigene0038641	Unigene0027517	0.000778947	0.0064	0.121711	0.0148	0.1217
ORTHOMCL8632	Unigene0008180	Unigene0037154	Unigene0015148	Unigene0018706	Unigene0033086	Unigene0004040	Unigene0008201	Unigene0006882	Unigene0010973	Unigene0016990	Unigene0009027	0.00101053	0.0083	0.12175	0.0191	0.1578
ORTHOMCL8460	Unigene0043036	Unigene0038517	Unigene0035633	Unigene0036513	Unigene0029181	Unigene0029197	Unigene0021071	Unigene0045289	Unigene0003789	Unigene0029476	Unigene0022046	0.00118421	0.00972632	0.121753	0.0225	0.1849
ORTHOMCL10492	Unigene0019146	Unigene0038513	Unigene0012334	Unigene0024502	Unigene0028060	Unigene0017927	Unigene0016531	Unigene0024751	Unigene0032887	Unigene0020220	Unigene0029406	0.00265789	0.0218158	0.121834	0.0506	0.4144
ORTHOMCL8030	Unigene0026309	Unigene0040535	Unigene0033920	Unigene0003260	Unigene0016363	Unigene0020373	Unigene0042798	Unigene0031615	Unigene0037699	Unigene0040344	Unigene0021893	0.00281053	0.0230421	0.121974	0.0535	0.4378
ORTHOMCL6488	Unigene0011804	Unigene0007955	Unigene0043304	Unigene0021282	Unigene0003943	Unigene0001808	Unigene0025220	Unigene0009236	Unigene0007645	Unigene0046859	Unigene0004304	0.000594737	0.00487368	0.12203	0.0113	0.0926
ORTHOMCL7287	Unigene0002499	Unigene0038017	Unigene0038507	Unigene0034358	Unigene0028331	Unigene0030958	Unigene0038953	Unigene0041122	Unigene0032820	Unigene0043833	Unigene0034728	0.00214737	0.0175947	0.122046	0.0409	0.3344
ORTHOMCL5876	Unigene0004266	Unigene0001809	Unigene0037398	Unigene0037298	Unigene0026226	Unigene0044979	Unigene0043921	Unigene0003170	Unigene0021235	Unigene0001371	Unigene0038317	0.000626316	0.00513158	0.122051	0.0119	0.0975
ORTHOMCL8415	Unigene0019483	Unigene0036499	Unigene0008252	Unigene0007892	Unigene0016546	Unigene0010134	Unigene0021859	Unigene0017313	Unigene0003725	Unigene0025663	Unigene0014277	0.0009	0.00737368	0.122056	0.0172	0.14
ORTHOMCL7124	Unigene0034982	Unigene0015718	Unigene0034853	Unigene0019408	Unigene0002346	Unigene0040607	Unigene0037424	Unigene0002968	Unigene0023389	Unigene0026148	Unigene0029812	0.00256316	0.0209842	0.122147	0.0486	0.3988
ORTHOMCL6675	Unigene0041287	Unigene0004854	Unigene0038659	Unigene0030495	Unigene0041615	Unigene0030943	Unigene0012531	Unigene0040622	Unigene0040517	Unigene0045165	Unigene0001965	0.00998421	0.0817	0.122206	0.1897	1.5525
ORTHOMCL7811	Unigene0015733	Unigene0016529	Unigene0011002	Unigene0003024	Unigene0011955	Unigene0026427	Unigene0012328	Unigene0027688	Unigene0040387	Unigene0026153	Unigene0004389	0.00441053	0.0360842	0.122229	0.0838	0.6855
ORTHOMCL8957	Unigene0004646	Unigene0035702	Unigene0042605	Unigene0016460	Unigene0008884	Unigene0004664	Unigene0021665	Unigene0006197	Unigene0041371	Unigene0005457	Unigene0032791	0.00196842	0.0160895	0.122342	0.0375	0.3059
ORTHOMCL7699	Unigene0009738	Unigene0002901	Unigene0041489	Unigene0018369	Unigene0020328	Unigene0045111	Unigene0043761	Unigene0011932	Unigene0034015	Unigene0048295	Unigene0032294	0.00364737	0.0297842	0.12246	0.0692	0.5658
ORTHOMCL5033	Unigene0026167	Unigene0000349	Unigene0011470	Unigene0023638	Unigene0022095	Unigene0018775	Unigene0016553	Unigene0045547	Unigene0022655	Unigene0028490	Unigene0034408	0.00215789	0.0176211	0.122461	0.0412	0.3347
ORTHOMCL4802	Unigene0007050	Unigene0004743	Unigene0000198	Unigene0039708	Unigene0047333	Unigene0002086	Unigene0002326	Unigene0008792	Unigene0013654	Unigene0008582	Unigene0009121	0.00187368	0.0152947	0.122505	0.0357	0.2905
ORTHOMCL4987	Unigene0036658	Unigene0034500	Unigene0035470	Unigene0000490	Unigene0028973	Unigene0040056	Unigene0042691	Unigene0000310	Unigene0035703	Unigene0046080	Unigene0031290	0.00270526	0.0220421	0.122732	0.0514	0.4187
ORTHOMCL5191	Unigene0038254	Unigene0039716	Unigene0011605	Unigene0034970	Unigene0001398	Unigene0029687	Unigene0026303	Unigene0000481	Unigene0032303	Unigene0044384	Unigene0037591	0.0023	0.0187368	0.122753	0.0435	0.3561
ORTHOMCL5350	Unigene0016359	Unigene0010153	Unigene0036707	Unigene0039741	Unigene0016845	Unigene0024985	Unigene0020435	Unigene0000686	Unigene0034596	Unigene0032961	Unigene0031060	0.00127895	0.0104158	0.122789	0.0244	0.198
ORTHOMCL7314	Unigene0040074	Unigene0011301	Unigene0002551	Unigene0025989	Unigene0039506	Unigene0038607	Unigene0026169	Unigene0029942	Unigene0008925	Unigene0009818	Unigene0002523	0.000915789	0.00745263	0.122881	0.0174	0.1417
ORTHOMCL10424	Unigene0042126	Unigene0039947	Unigene0020975	Unigene0035583	Unigene0037625	Unigene0044288	Unigene0041559	Unigene0040273	Unigene0011723	Unigene0028116	Unigene0033583	0.000578947	0.00471053	0.122905	0.0113	0.0894
ORTHOMCL5348	Unigene0006849	Unigene0000685	Unigene0002569	Unigene0015724	Unigene0041049	Unigene0020313	Unigene0021914	Unigene0016126	Unigene0002497	Unigene0025447	Unigene0003250	0.0014	0.0113895	0.122921	0.0265	0.2166
ORTHOMCL10834	Unigene0034150	Unigene0028737	Unigene0018637	Unigene0022094	Unigene0036298	Unigene0027117	Unigene0033732	Unigene0027888	Unigene0031093	Unigene0040859	Unigene0022754	0.000873684	0.0071	0.123054	0.0165	0.135
ORTHOMCL8595	Unigene0004165	Unigene0022659	Unigene0037162	Unigene0018606	Unigene0046849	Unigene0042861	Unigene0008326	Unigene0003983	Unigene0039625	Unigene0013824	Unigene0037399	0.00358421	0.0291105	0.123124	0.0681	0.5533
ORTHOMCL5576	Unigene0019876	Unigene0017514	Unigene0001671	Unigene0001066	Unigene0030231	Unigene0027828	Unigene0025026	Unigene0017257	Unigene0032081	Unigene0012745	Unigene0017767	0.000810526	0.00657895	0.1232	0.0154	0.1251
ORTHOMCL6220	Unigene0005180	Unigene0032742	Unigene0025317	Unigene0001618	Unigene0022899	Unigene0012222	Unigene0045369	Unigene0001792	Unigene0016334	Unigene0020711	Unigene0037354	0.00265789	0.0215632	0.123261	0.0505	0.4098
ORTHOMCL7876	Unigene0015979	Unigene0005976	Unigene0006951	Unigene0021290	Unigene0013844	Unigene0003071	Unigene0029713	Unigene0044377	Unigene0010301	Unigene0021427	Unigene0031325	0.00257368	0.0208579	0.123391	0.0488	0.3964
ORTHOMCL6064	Unigene0043268	Unigene0020086	Unigene0037408	Unigene0008669	Unigene0043032	Unigene0014447	Unigene0028087	Unigene0010338	Unigene0040133	Unigene0001496	Unigene0002664	0.00298421	0.0241737	0.123449	0.0569	0.4593
ORTHOMCL5011	Unigene0044616	Unigene0024286	Unigene0024234	Unigene0040532	Unigene0013461	Unigene0017876	Unigene0004330	Unigene0000334	Unigene0020256	Unigene0016095	Unigene0010750	0.00183684	0.0148579	0.123627	0.0348	0.2823
ORTHOMCL4946	Unigene0000853	Unigene0000279	Unigene0043641	Unigene0000851	Unigene0004343	Unigene0022797	Unigene0041365	Unigene0001389	Unigene0037395	Unigene0000576	Unigene0035825	0.00238421	0.0192684	0.123737	0.0454	0.3661
ORTHOMCL5106	Unigene0001498	Unigene0000458	Unigene0000580	Unigene0000415	Unigene0001044	Unigene0000884	Unigene0000916	Unigene0001072	Unigene0000651	Unigene0001129	Unigene0000517	0.00280526	0.0226526	0.123838	0.0533	0.4303
ORTHOMCL10630	Unigene0014336	Unigene0033169	Unigene0028417	Unigene0031481	Unigene0024348	Unigene0025012	Unigene0019509	Unigene0032228	Unigene0020675	Unigene0014858	Unigene0019740	0.00267895	0.0216316	0.123844	0.0508	0.4111
ORTHOMCL6578	Unigene0045394	Unigene0011179	Unigene0015929	Unigene0033452	Unigene0005039	Unigene0001894	Unigene0011806	Unigene0024807	Unigene0003396	Unigene0008504	Unigene0008332	0.000657895	0.00531053	0.123885	0.0126	0.1009
ORTHOMCL8628	Unigene0022068	Unigene0016952	Unigene0037346	Unigene0020889	Unigene0004037	Unigene0010324	Unigene0027891	Unigene0029158	Unigene0036309	Unigene0018774	Unigene0033110	0.00829474	0.0669368	0.123919	0.1577	1.2717
ORTHOMCL4868	Unigene0031996	Unigene0035875	Unigene0000230	Unigene0007791	Unigene0018066	Unigene0009962	Unigene0042854	Unigene0001302	Unigene0034330	Unigene0016927	Unigene0028844	0.00235263	0.0189789	0.12396	0.0447	0.3605
ORTHOMCL8789	Unigene0019267	Unigene0022584	Unigene0004826	Unigene0008773	Unigene0037550	Unigene0026071	Unigene0017094	Unigene0043534	Unigene0027340	Unigene0026699	Unigene0004340	0.0008	0.00645263	0.12398	0.0153	0.1226
ORTHOMCL7745	Unigene0040305	Unigene0027427	Unigene0037107	Unigene0038145	Unigene0041267	Unigene0035282	Unigene0002958	Unigene0042383	Unigene0004274	Unigene0030555	Unigene0034613	0.00112105	0.00904211	0.123981	0.0214	0.172
ORTHOMCL5455	Unigene0000852	Unigene0027104	Unigene0010292	Unigene0002439	Unigene0002972	Unigene0001416	Unigene0044001	Unigene0003468	Unigene0013538	Unigene0015928	Unigene0005579	0.00121579	0.00980526	0.123994	0.023	0.1863
ORTHOMCL7608	Unigene0045775	Unigene0030296	Unigene0041383	Unigene0034489	Unigene0041977	Unigene0044686	Unigene0036612	Unigene0043303	Unigene0002797	Unigene0047965	Unigene0029934	0.00321053	0.0258895	0.124009	0.0611	0.492
ORTHOMCL6921	Unigene0043682	Unigene0004325	Unigene0007579	Unigene0038764	Unigene0002158	Unigene0033075	Unigene0047961	Unigene0040440	Unigene0002927	Unigene0027704	Unigene0006846	0.00121053	0.00975789	0.124056	0.0231	0.1855
ORTHOMCL5941	Unigene0043991	Unigene0024024	Unigene0041191	Unigene0016587	Unigene0012475	Unigene0044232	Unigene0001405	Unigene0018534	Unigene0004507	Unigene0041023	Unigene0002676	0.0032	0.0257947	0.124056	0.0609	0.4902
ORTHOMCL8103	Unigene0033158	Unigene0009495	Unigene0031173	Unigene0025006	Unigene0013918	Unigene0037363	Unigene0003339	Unigene0010110	Unigene0010622	Unigene0035055	Unigene0026859	0.000857895	0.00691053	0.124143	0.0163	0.1314
ORTHOMCL5261	Unigene0000541	Unigene0030804	Unigene0032435	Unigene0032438	Unigene0018995	Unigene0005575	Unigene0030423	Unigene0035485	Unigene0033827	Unigene0044358	Unigene0025469	0.0012	0.00965789	0.124251	0.0228	0.1834
ORTHOMCL7685	Unigene0038867	Unigene0041426	Unigene0038237	Unigene0032072	Unigene0024470	Unigene0002881	Unigene0026449	Unigene0035185	Unigene0033696	Unigene0036354	Unigene0036597	0.00395789	0.0318263	0.124359	0.0753	0.6048
ORTHOMCL9694	Unigene0042443	Unigene0027848	Unigene0032672	Unigene0028427	Unigene0036661	Unigene0034415	Unigene0039357	Unigene0006733	Unigene0029608	Unigene0039921	Unigene0023774	0.00114211	0.00917895	0.124427	0.0217	0.1745
ORTHOMCL7413	Unigene0002608	Unigene0026256	Unigene0006716	Unigene0036006	Unigene0003379	Unigene0003488	Unigene0046151	Unigene0012207	Unigene0008717	Unigene0048720	Unigene0034794	0.000631579	0.00506842	0.124611	0.0121	0.0963
ORTHOMCL5096	Unigene0000405	Unigene0002820	Unigene0019401	Unigene0035348	Unigene0046498	Unigene0040883	Unigene0043938	Unigene0041151	Unigene0034874	Unigene0042193	Unigene0003804	0.00375789	0.0301474	0.124651	0.0714	0.5728
ORTHOMCL7217	Unigene0005187	Unigene0030080	Unigene0041322	Unigene0003106	Unigene0023354	Unigene0023379	Unigene0019128	Unigene0029679	Unigene0031210	Unigene0026276	Unigene0002420	0.00126842	0.0101737	0.124677	0.024	0.1933
ORTHOMCL4858	Unigene0005703	Unigene0000226	Unigene0006549	Unigene0035928	Unigene0037792	Unigene0028881	Unigene0030860	Unigene0017593	Unigene0024386	Unigene0022554	Unigene0032906	0.00181053	0.0145211	0.124683	0.0346	0.276
ORTHOMCL9375	Unigene0013996	Unigene0008227	Unigene0033926	Unigene0005654	Unigene0008081	Unigene0013445	Unigene0006532	Unigene0047651	Unigene0038763	Unigene0030093	Unigene0029066	0.00188947	0.0151526	0.124696	0.0358	0.288
ORTHOMCL10928	Unigene0022731	Unigene0036810	Unigene0027059	Unigene0028566	Unigene0046814	Unigene0039063	Unigene0036055	Unigene0027801	Unigene0028615	Unigene0037253	Unigene0025393	0.000610526	0.00489474	0.124731	0.0116	0.0931
ORTHOMCL8236	Unigene0004492	Unigene0014888	Unigene0020954	Unigene0012219	Unigene0004889	Unigene0003502	Unigene0019980	Unigene0010759	Unigene0016321	Unigene0029585	Unigene0037075	0.00125263	0.0100421	0.124738	0.0239	0.1908
ORTHOMCL7512	Unigene0023648	Unigene0002711	Unigene0038368	Unigene0019700	Unigene0028067	Unigene0023176	Unigene0025309	Unigene0043163	Unigene0010802	Unigene0022385	Unigene0030209	0.00161579	0.0129526	0.124746	0.0307	0.2461
ORTHOMCL6067	Unigene0033782	Unigene0036392	Unigene0031406	Unigene0038867	Unigene0025294	Unigene0023120	Unigene0043865	Unigene0023450	Unigene0001498	Unigene0035664	Unigene0035027	0.00325263	0.0260737	0.124748	0.0618	0.4953
ORTHOMCL5010	Unigene0006167	Unigene0025679	Unigene0038686	Unigene0025223	Unigene0012500	Unigene0019427	Unigene0045168	Unigene0016777	Unigene0036888	Unigene0000333	Unigene0017938	0.0021	0.0168316	0.124765	0.0398	0.3198
ORTHOMCL10135	Unigene0042341	Unigene0027580	Unigene0027630	Unigene0027092	Unigene0012098	Unigene0013691	Unigene0037872	Unigene0042370	Unigene0009008	Unigene0015062	Unigene0010601	0.00111579	0.00894211	0.124779	0.0211	0.17
ORTHOMCL10214	Unigene0037535	Unigene0009734	Unigene0028307	Unigene0027666	Unigene0034306	Unigene0028779	Unigene0038321	Unigene0034939	Unigene0029262	Unigene0037307	Unigene0026189	0.00146842	0.0117579	0.124888	0.0279	0.2235
ORTHOMCL9294	Unigene0039162	Unigene0040659	Unigene0005392	Unigene0012236	Unigene0017410	Unigene0036880	Unigene0043028	Unigene0015154	Unigene0018650	Unigene0015283	Unigene0022932	0.00296842	0.0237684	0.124889	0.0563	0.4516
ORTHOMCL10401	Unigene0038744	Unigene0012831	Unigene0035495	Unigene0013816	Unigene0046345	Unigene0019722	Unigene0035219	Unigene0034758	Unigene0040141	Unigene0022803	Unigene0011426	0.00103684	0.0083	0.124921	0.0198	0.1579
ORTHOMCL9219	Unigene0021724	Unigene0017877	Unigene0008565	Unigene0008246	Unigene0005195	Unigene0029652	Unigene0010710	Unigene0014186	Unigene0020552	Unigene0012655	Unigene0015992	0.00154737	0.0123789	0.125	0.0295	0.2354
ORTHOMCL9859	Unigene0007464	Unigene0041484	Unigene0021085	Unigene0031174	Unigene0030810	Unigene0033822	Unigene0019735	Unigene0010395	Unigene0033014	Unigene0023919	Unigene0029684	0.00120526	0.00964211	0.125	0.0228	0.1831
ORTHOMCL7250	Unigene0002448	Unigene0034901	Unigene0040560	Unigene0005538	Unigene0003017	Unigene0037401	Unigene0025397	Unigene0043704	Unigene0028072	Unigene0030967	Unigene0034549	0.00528947	0.0422842	0.125093	0.1005	0.8033
ORTHOMCL10475	Unigene0012208	Unigene0032337	Unigene0034676	Unigene0032280	Unigene0046742	Unigene0012670	Unigene0044464	Unigene0025033	Unigene0022715	Unigene0028365	Unigene0038360	0.00111053	0.00886842	0.125223	0.0211	0.1686
ORTHOMCL6709	Unigene0042741	Unigene0002158	Unigene0003170	Unigene0001996	Unigene0041440	Unigene0043883	Unigene0002606	Unigene0043902	Unigene0039612	Unigene0048639	Unigene0032322	0.000815789	0.00650526	0.125405	0.0156	0.1237
ORTHOMCL5981	Unigene0005372	Unigene0038216	Unigene0029970	Unigene0034669	Unigene0035306	Unigene0017674	Unigene0001432	Unigene0045935	Unigene0022277	Unigene0035033	Unigene0012022	0.000926316	0.00738421	0.125445	0.0174	0.1401
ORTHOMCL6066	Unigene0031048	Unigene0001498	Unigene0033994	Unigene0019887	Unigene0041570	Unigene0028387	Unigene0041704	Unigene0046472	Unigene0005509	Unigene0047789	Unigene0030413	0.00227895	0.0181474	0.12558	0.0432	0.3449
ORTHOMCL10920	Unigene0044424	Unigene0024761	Unigene0038999	Unigene0039135	Unigene0045887	Unigene0042501	Unigene0032886	Unigene0043636	Unigene0022124	Unigene0034070	Unigene0031349	0.000684211	0.00544737	0.125604	0.0128	0.1035
ORTHOMCL8026	Unigene0008975	Unigene0022607	Unigene0015392	Unigene0021745	Unigene0017323	Unigene0003252	Unigene0045982	Unigene0045634	Unigene0022131	Unigene0009480	Unigene0010935	0.000573684	0.00456316	0.125721	0.0108	0.0868
ORTHOMCL10575	Unigene0027905	Unigene0022640	Unigene0014635	Unigene0025004	Unigene0021539	Unigene0021609	Unigene0013464	Unigene0026389	Unigene0041204	Unigene0029946	Unigene0032566	0.00203684	0.0162	0.125731	0.0386	0.3078
ORTHOMCL9991	Unigene0037505	Unigene0034117	Unigene0034083	Unigene0025459	Unigene0030476	Unigene0040047	Unigene0029548	Unigene0041646	Unigene0008117	Unigene0026068	Unigene0036196	0.00181579	0.0144368	0.125775	0.0345	0.2742
ORTHOMCL6607	Unigene0015869	Unigene0030388	Unigene0008495	Unigene0008044	Unigene0005806	Unigene0013005	Unigene0011833	Unigene0006719	Unigene0038829	Unigene0001919	Unigene0039476	0.00285789	0.0227211	0.125782	0.0543	0.4317
ORTHOMCL4394	Unigene0018187	Unigene0021234	Unigene0019978	Unigene0028163	Unigene0016741	Unigene0023281	Unigene0032323	Unigene0013815	Unigene0000012	Unigene0041063	Unigene0019959	0.00103684	0.00824211	0.125798	0.0198	0.1565
ORTHOMCL10688	Unigene0044917	Unigene0033102	Unigene0042389	Unigene0035202	Unigene0042277	Unigene0040327	Unigene0044490	Unigene0015373	Unigene0035142	Unigene0045944	Unigene0029853	0.000889474	0.00706842	0.125838	0.0169	0.1344
ORTHOMCL7627	Unigene0002815	Unigene0028287	Unigene0003781	Unigene0036707	Unigene0007788	Unigene0040433	Unigene0042081	Unigene0002917	Unigene0008449	Unigene0006392	Unigene0031024	0.00455263	0.0361737	0.125855	0.0864	0.6871
ORTHOMCL5629	Unigene0042039	Unigene0021740	Unigene0034046	Unigene0031717	Unigene0045202	Unigene0027861	Unigene0021384	Unigene0044503	Unigene0001131	Unigene0015340	Unigene0028525	0.00464737	0.0369	0.125945	0.0882	0.701
ORTHOMCL9835	Unigene0034901	Unigene0026722	Unigene0021541	Unigene0022114	Unigene0032021	Unigene0016768	Unigene0021632	Unigene0007319	Unigene0018742	Unigene0039625	Unigene0023523	0.000884211	0.00701579	0.126032	0.0169	0.1334
ORTHOMCL7383	Unigene0007294	Unigene0002667	Unigene0020382	Unigene0032880	Unigene0043705	Unigene0020311	Unigene0039122	Unigene0002581	Unigene0040089	Unigene0044637	Unigene0031079	0.00111053	0.00881053	0.126045	0.0212	0.1673
ORTHOMCL8600	Unigene0013141	Unigene0011136	Unigene0014076	Unigene0010870	Unigene0033730	Unigene0019246	Unigene0020503	Unigene0031097	Unigene0003993	Unigene0006701	Unigene0026276	0.00323684	0.0256632	0.126128	0.0616	0.4877
ORTHOMCL9641	Unigene0040723	Unigene0039966	Unigene0036343	Unigene0022256	Unigene0033400	Unigene0045558	Unigene0006515	Unigene0041102	Unigene0007156	Unigene0039104	Unigene0038559	0.00471579	0.0373526	0.126251	0.0897	0.7099
ORTHOMCL10541	Unigene0042804	Unigene0030464	Unigene0040022	Unigene0038715	Unigene0043840	Unigene0047070	Unigene0014836	Unigene0018804	Unigene0027886	Unigene0025556	Unigene0012985	0.000552632	0.00437368	0.126354	0.0104	0.0832
ORTHOMCL7918	Unigene0037512	Unigene0034015	Unigene0034792	Unigene0031568	Unigene0045716	Unigene0040665	Unigene0026299	Unigene0034985	Unigene0003122	Unigene0033266	Unigene0032919	0.000910526	0.0072	0.126462	0.0172	0.1369
ORTHOMCL10584	Unigene0040420	Unigene0025900	Unigene0013587	Unigene0032016	Unigene0038520	Unigene0024271	Unigene0023971	Unigene0028250	Unigene0018411	Unigene0034131	Unigene0028162	0.000636842	0.00503158	0.126569	0.0121	0.0956
ORTHOMCL8907	Unigene0017935	Unigene0028762	Unigene0039520	Unigene0020775	Unigene0027578	Unigene0016226	Unigene0004551	Unigene0041808	Unigene0010722	Unigene0029244	Unigene0034252	0.00419474	0.0331211	0.126649	0.0797	0.6292
ORTHOMCL10977	Unigene0026837	Unigene0041734	Unigene0043817	Unigene0030163	Unigene0026092	Unigene0041335	Unigene0043848	Unigene0044290	Unigene0038848	Unigene0041502	Unigene0037617	0.00115263	0.00908421	0.126883	0.0218	0.1727
ORTHOMCL8386	Unigene0038106	Unigene0003687	Unigene0025434	Unigene0021521	Unigene0029627	Unigene0022932	Unigene0022032	Unigene0032144	Unigene0033042	Unigene0025560	Unigene0030353	0.00450526	0.0355053	0.12689	0.0857	0.6744
ORTHOMCL8044	Unigene0003267	Unigene0014942	Unigene0027712	Unigene0019786	Unigene0009935	Unigene0025047	Unigene0008725	Unigene0024626	Unigene0034182	Unigene0038064	Unigene0012486	0.00129474	0.0101895	0.127066	0.0246	0.1937
ORTHOMCL5322	Unigene0000617	Unigene0001629	Unigene0000988	Unigene0010424	Unigene0021725	Unigene0045492	Unigene0011792	Unigene0046000	Unigene0036690	Unigene0044408	Unigene0027148	0.00423158	0.0332895	0.127115	0.0804	0.6325
ORTHOMCL6624	Unigene0020067	Unigene0028483	Unigene0011882	Unigene0006101	Unigene0004315	Unigene0029195	Unigene0036865	Unigene0036293	Unigene0007997	Unigene0001931	Unigene0022116	0.00292632	0.0230211	0.127115	0.0555	0.4374
ORTHOMCL7740	Unigene0045177	Unigene0020626	Unigene0043320	Unigene0002955	Unigene0003387	Unigene0013050	Unigene0003361	Unigene0015870	Unigene0015855	Unigene0021342	Unigene0005709	0.00215789	0.0169737	0.127132	0.041	0.3225
ORTHOMCL10872	Unigene0034316	Unigene0029473	Unigene0042524	Unigene0029377	Unigene0035393	Unigene0025031	Unigene0019778	Unigene0028407	Unigene0028334	Unigene0045929	Unigene0026068	0.000115789	0.000910526	0.127168	0.0023	0.0174
ORTHOMCL6633	Unigene0001936	Unigene0026400	Unigene0042896	Unigene0038771	Unigene0047353	Unigene0046442	Unigene0026526	Unigene0040777	Unigene0019804	Unigene0046326	Unigene0031227	0.0008	0.00628421	0.127303	0.0153	0.1195
ORTHOMCL7852	Unigene0033096	Unigene0036901	Unigene0003050	Unigene0004830	Unigene0034461	Unigene0022249	Unigene0023797	Unigene0013758	Unigene0015116	Unigene0044178	Unigene0031877	0.000994737	0.00781053	0.127358	0.0189	0.1484
ORTHOMCL8484	Unigene0016940	Unigene0034066	Unigene0011537	Unigene0003818	Unigene0030567	Unigene0016601	Unigene0022407	Unigene0013788	Unigene0024016	Unigene0008061	Unigene0011654	0.00315263	0.0247421	0.12742	0.06	0.4702
ORTHOMCL10076	Unigene0025336	Unigene0041752	Unigene0029074	Unigene0018615	Unigene0023787	Unigene0016179	Unigene0008585	Unigene0024946	Unigene0040986	Unigene0019532	Unigene0019986	0.00206316	0.0161895	0.127438	0.0393	0.3075
ORTHOMCL9964	Unigene0040608	Unigene0016719	Unigene0010743	Unigene0007981	Unigene0023657	Unigene0027173	Unigene0025164	Unigene0010486	Unigene0010289	Unigene0023986	Unigene0012110	0.00253684	0.0199053	0.127446	0.0483	0.378
ORTHOMCL4449	Unigene0037762	Unigene0023749	Unigene0026496	Unigene0040788	Unigene0026311	Unigene0015046	Unigene0000212	Unigene0034362	Unigene0032866	Unigene0000035	Unigene0023896	0.00293158	0.0229895	0.127518	0.0557	0.4368
ORTHOMCL10297	Unigene0032997	Unigene0010431	Unigene0029189	Unigene0030479	Unigene0034215	Unigene0036485	Unigene0012905	Unigene0038784	Unigene0031365	Unigene0035475	Unigene0023744	0.000557895	0.00437368	0.127557	0.0106	0.0831
ORTHOMCL8124	Unigene0022855	Unigene0020078	Unigene0003361	Unigene0011463	Unigene0028611	Unigene0026150	Unigene0015909	Unigene0034568	Unigene0035733	Unigene0033059	Unigene0031385	0.00108421	0.00849474	0.127633	0.0207	0.1615
ORTHOMCL8511	Unigene0037424	Unigene0003865	Unigene0021992	Unigene0038792	Unigene0007348	Unigene0040562	Unigene0043803	Unigene0015475	Unigene0024210	Unigene0049135	Unigene0031787	0.00364737	0.0285368	0.127813	0.0691	0.5422
ORTHOMCL8538	Unigene0023621	Unigene0014601	Unigene0003908	Unigene0025354	Unigene0012318	Unigene0004066	Unigene0019817	Unigene0032255	Unigene0016814	Unigene0041463	Unigene0011310	0.0008	0.00625789	0.127839	0.0152	0.1189
ORTHOMCL8672	Unigene0004111	Unigene0021278	Unigene0032578	Unigene0034512	Unigene0007616	Unigene0004820	Unigene0029978	Unigene0042050	Unigene0035951	Unigene0031174	Unigene0031014	0.00427368	0.0334211	0.127874	0.0812	0.6351
ORTHOMCL10942	Unigene0042229	Unigene0027623	Unigene0029002	Unigene0031587	Unigene0039574	Unigene0033231	Unigene0041771	Unigene0043543	Unigene0031221	Unigene0039621	Unigene0023519	0.000994737	0.00776842	0.128049	0.0189	0.1476
ORTHOMCL6198	Unigene0002943	Unigene0002215	Unigene0034818	Unigene0034038	Unigene0044909	Unigene0036510	Unigene0001594	Unigene0044298	Unigene0038473	Unigene0045405	Unigene0037686	0.000457895	0.00357368	0.12813	0.0087	0.0678
ORTHOMCL6191	Unigene0039857	Unigene0036461	Unigene0035545	Unigene0033725	Unigene0021046	Unigene0043173	Unigene0043128	Unigene0001590	Unigene0037243	Unigene0045879	Unigene0030503	0.00345263	0.0269421	0.12815	0.0657	0.512
ORTHOMCL10095	Unigene0045880	Unigene0011689	Unigene0023961	Unigene0038200	Unigene0027336	Unigene0041091	Unigene0040692	Unigene0008716	Unigene0023467	Unigene0026391	Unigene0036379	0.000642105	0.00501053	0.128151	0.0123	0.095
ORTHOMCL5998	Unigene0019952	Unigene0028453	Unigene0027690	Unigene0001442	Unigene0033916	Unigene0033165	Unigene0036828	Unigene0046223	Unigene0026517	Unigene0039436	Unigene0026007	0.000663158	0.00517368	0.128179	0.0125	0.0983
ORTHOMCL10377	Unigene0041103	Unigene0011146	Unigene0036578	Unigene0017626	Unigene0030623	Unigene0025599	Unigene0025337	Unigene0023462	Unigene0028269	Unigene0021963	Unigene0024230	0.0618737	0.482247	0.128303	1.1756	9.1627
ORTHOMCL8309	Unigene0005167	Unigene0033674	Unigene0036924	Unigene0019585	Unigene0003582	Unigene0028886	Unigene0028879	Unigene0004524	Unigene0034494	Unigene0048436	Unigene0036602	0.00234211	0.0182316	0.128464	0.0444	0.3465
ORTHOMCL10629	Unigene0041304	Unigene0016055	Unigene0017596	Unigene0038575	Unigene0042274	Unigene0022375	Unigene0047583	Unigene0046958	Unigene0026969	Unigene0018042	Unigene0014323	0.00186316	0.0144789	0.12868	0.0355	0.2752
ORTHOMCL4865	Unigene0001776	Unigene0041693	Unigene0017072	Unigene0023456	Unigene0000229	Unigene0016008	Unigene0006458	Unigene0004781	Unigene0014462	Unigene0007639	Unigene0017382	0.00275789	0.0214	0.128874	0.0525	0.4065
ORTHOMCL5828	Unigene0040277	Unigene0009306	Unigene0010781	Unigene0011691	Unigene0001669	Unigene0001681	Unigene0019770	Unigene0012458	Unigene0015788	Unigene0019003	Unigene0001316	0.00348947	0.0270684	0.128913	0.0663	0.5143
ORTHOMCL10706	Unigene0037078	Unigene0015956	Unigene0016884	Unigene0015691	Unigene0031292	Unigene0039348	Unigene0034065	Unigene0030401	Unigene0037989	Unigene0033121	Unigene0029325	0.00359474	0.0278789	0.128941	0.0681	0.5297
ORTHOMCL4382	Unigene0010166	Unigene0000783	Unigene0035469	Unigene0034081	Unigene0046645	Unigene0024346	Unigene0006090	Unigene0042587	Unigene0000008	Unigene0037383	Unigene0030358	0.000984211	0.00763158	0.128966	0.0187	0.1451
ORTHOMCL4817	Unigene0029039	Unigene0003614	Unigene0000205	Unigene0028292	Unigene0003801	Unigene0040493	Unigene0036659	Unigene0027572	Unigene0036303	Unigene0035339	Unigene0007015	0.000663158	0.00514211	0.128966	0.0127	0.0978
ORTHOMCL5958	Unigene0012973	Unigene0001518	Unigene0006847	Unigene0035683	Unigene0001420	Unigene0002613	Unigene0047904	Unigene0008858	Unigene0042624	Unigene0024600	Unigene0001809	0.000715789	0.00554737	0.129032	0.0137	0.1053
ORTHOMCL5842	Unigene0002144	Unigene0034136	Unigene0021818	Unigene0001335	Unigene0040581	Unigene0028921	Unigene0013678	Unigene0041974	Unigene0018186	Unigene0033140	Unigene0029565	0.00277368	0.0214947	0.12904	0.0527	0.4084
ORTHOMCL5349	Unigene0017259	Unigene0041209	Unigene0023910	Unigene0002569	Unigene0032014	Unigene0041230	Unigene0005239	Unigene0000685	Unigene0012131	Unigene0003802	Unigene0001007	0.00132105	0.0102368	0.129049	0.0252	0.1944
ORTHOMCL8157	Unigene0013555	Unigene0012117	Unigene0017693	Unigene0016236	Unigene0043058	Unigene0031716	Unigene0007922	Unigene0010419	Unigene0014095	Unigene0003402	Unigene0003496	0.000726316	0.00562632	0.129093	0.0138	0.1069
ORTHOMCL6403	Unigene0009309	Unigene0001753	Unigene0026593	Unigene0011916	Unigene0047662	Unigene0006636	Unigene0038019	Unigene0039490	Unigene0042116	Unigene0036726	Unigene0024826	0.00114211	0.00883684	0.129244	0.0216	0.168
ORTHOMCL10844	Unigene0027172	Unigene0041182	Unigene0035351	Unigene0019022	Unigene0031330	Unigene0021243	Unigene0041273	Unigene0041226	Unigene0024366	Unigene0035251	Unigene0020121	0.00361579	0.0279632	0.129305	0.0689	0.5312
ORTHOMCL9836	Unigene0011186	Unigene0023676	Unigene0028377	Unigene0010198	Unigene0023134	Unigene0042187	Unigene0042268	Unigene0011422	Unigene0033659	Unigene0045829	Unigene0007323	0.00272632	0.0210842	0.129306	0.0518	0.4007
ORTHOMCL10365	Unigene0038038	Unigene0037377	Unigene0012324	Unigene0034293	Unigene0027073	Unigene0046833	Unigene0046473	Unigene0029035	Unigene0017941	Unigene0010992	Unigene0018470	0.00103158	0.00797368	0.129373	0.0196	0.1515
ORTHOMCL5299	Unigene0007128	Unigene0010005	Unigene0000589	Unigene0039707	Unigene0001688	Unigene0044939	Unigene0003299	Unigene0005103	Unigene0000613	Unigene0031541	Unigene0029993	0.00253158	0.0195579	0.12944	0.0482	0.3717
ORTHOMCL7857	Unigene0003057	Unigene0036995	Unigene0028799	Unigene0031998	Unigene0009365	Unigene0013812	Unigene0036763	Unigene0006419	Unigene0012582	Unigene0035108	Unigene0026871	0.000463158	0.00357368	0.129602	0.0086	0.068
ORTHOMCL8248	Unigene0043697	Unigene0023921	Unigene0035535	Unigene0014520	Unigene0044900	Unigene0003514	Unigene0042519	Unigene0042233	Unigene0039551	Unigene0019002	Unigene0034152	0.00234737	0.0181053	0.129651	0.0446	0.3441
ORTHOMCL7486	Unigene0010967	Unigene0004396	Unigene0043133	Unigene0017586	Unigene0008300	Unigene0022497	Unigene0002683	Unigene0040625	Unigene0012909	Unigene0016273	Unigene0026955	0.000794737	0.00612105	0.129837	0.0153	0.1162
ORTHOMCL4659	Unigene0010192	Unigene0027155	Unigene0036538	Unigene0039648	Unigene0031789	Unigene0000929	Unigene0000202	Unigene0025578	Unigene0003149	Unigene0000117	Unigene0023004	0.00147895	0.0113842	0.129912	0.0282	0.2163
ORTHOMCL4932	Unigene0003056	Unigene0039699	Unigene0039233	Unigene0027617	Unigene0042755	Unigene0044433	Unigene0023529	Unigene0028383	Unigene0000269	Unigene0003430	Unigene0032953	0.00262632	0.0202158	0.129914	0.05	0.384
ORTHOMCL5806	Unigene0007881	Unigene0003076	Unigene0011685	Unigene0014917	Unigene0004099	Unigene0012595	Unigene0038087	Unigene0040422	Unigene0001289	Unigene0008821	Unigene0039960	0.0026	0.0200053	0.129966	0.0495	0.3801
ORTHOMCL6864	Unigene0005399	Unigene0034886	Unigene0036802	Unigene0024965	Unigene0047218	Unigene0034200	Unigene0048407	Unigene0002106	Unigene0031569	Unigene0036554	Unigene0023255	0.00340526	0.0262	0.129972	0.0646	0.4979
ORTHOMCL8216	Unigene0040610	Unigene0014703	Unigene0038912	Unigene0006400	Unigene0003470	Unigene0041586	Unigene0013177	Unigene0044447	Unigene0033425	Unigene0033379	Unigene0033363	0.00208947	0.0160684	0.130036	0.0396	0.3053
ORTHOMCL5829	Unigene0005126	Unigene0018865	Unigene0041687	Unigene0003306	Unigene0003472	Unigene0047015	Unigene0045109	Unigene0046492	Unigene0026815	Unigene0001319	Unigene0039198	0.000715789	0.0055	0.130144	0.0136	0.1044
ORTHOMCL10155	Unigene0009215	Unigene0018115	Unigene0017049	Unigene0018435	Unigene0024726	Unigene0028125	Unigene0012152	Unigene0018779	Unigene0034341	Unigene0030669	Unigene0012697	0.0005	0.00383684	0.130316	0.0094	0.073
ORTHOMCL7126	Unigene0008906	Unigene0035055	Unigene0002347	Unigene0032525	Unigene0039132	Unigene0027665	Unigene0002757	Unigene0003124	Unigene0032577	Unigene0011994	Unigene0039768	0.00123684	0.00948947	0.130338	0.0236	0.1804
ORTHOMCL6636	Unigene0001937	Unigene0020821	Unigene0010832	Unigene0018216	Unigene0033508	Unigene0008660	Unigene0040121	Unigene0008280	Unigene0037948	Unigene0024271	Unigene0023381	0.00101053	0.00774737	0.130435	0.0192	0.1471
ORTHOMCL5363	Unigene0000708	Unigene0035324	Unigene0023360	Unigene0013077	Unigene0034107	Unigene0040250	Unigene0046637	Unigene0029457	Unigene0024166	Unigene0026657	Unigene0027420	0.00193158	0.0148	0.130512	0.0365	0.2813
ORTHOMCL7772	Unigene0039510	Unigene0013442	Unigene0007524	Unigene0002986	Unigene0031648	Unigene0011635	Unigene0041453	Unigene0033891	Unigene0022644	Unigene0004171	Unigene0032815	0.00250526	0.0191737	0.130662	0.0476	0.3643
ORTHOMCL5454	Unigene0022318	Unigene0036489	Unigene0037217	Unigene0019077	Unigene0003963	Unigene0017373	Unigene0001061	Unigene0000850	Unigene0036955	Unigene0016199	Unigene0010708	0.00257895	0.0197316	0.130702	0.0491	0.3747
ORTHOMCL7135	Unigene0038583	Unigene0026387	Unigene0007289	Unigene0004278	Unigene0041401	Unigene0028726	Unigene0017187	Unigene0034563	Unigene0039243	Unigene0049249	Unigene0002355	0.000647368	0.00495263	0.130712	0.0125	0.0942
ORTHOMCL9862	Unigene0025704	Unigene0007475	Unigene0027697	Unigene0009278	Unigene0016868	Unigene0033671	Unigene0040091	Unigene0022700	Unigene0018796	Unigene0040264	Unigene0031116	0.000852632	0.00652105	0.130751	0.0162	0.1239
ORTHOMCL6917	Unigene0028626	Unigene0038723	Unigene0006955	Unigene0022229	Unigene0043387	Unigene0007914	Unigene0034141	Unigene0044720	Unigene0030077	Unigene0005257	Unigene0002156	0.00118947	0.00908421	0.130939	0.0227	0.1727
ORTHOMCL5612	Unigene0045292	Unigene0009534	Unigene0043203	Unigene0002082	Unigene0007898	Unigene0032497	Unigene0018589	Unigene0044373	Unigene0020641	Unigene0048381	Unigene0001107	0.00158947	0.0121263	0.131076	0.0302	0.2304
ORTHOMCL10614	Unigene0034532	Unigene0018196	Unigene0029717	Unigene0032932	Unigene0025699	Unigene0042287	Unigene0026515	Unigene0014085	Unigene0042424	Unigene0039451	Unigene0018778	0.00119474	0.00910526	0.131214	0.0228	0.173
ORTHOMCL6359	Unigene0038615	Unigene0028774	Unigene0025160	Unigene0013316	Unigene0018332	Unigene0001717	Unigene0019211	Unigene0029911	Unigene0004987	Unigene0025641	Unigene0034166	0.00123158	0.00937895	0.131313	0.0234	0.1782
ORTHOMCL7375	Unigene0043936	Unigene0010506	Unigene0004908	Unigene0032754	Unigene0010226	Unigene0030234	Unigene0045334	Unigene0002576	Unigene0033786	Unigene0046421	Unigene0030537	0.000826316	0.00628421	0.131491	0.0156	0.1196
ORTHOMCL5879	Unigene0034307	Unigene0007217	Unigene0001373	Unigene0010068	Unigene0029716	Unigene0026221	Unigene0024534	Unigene0027491	Unigene0030212	Unigene0012686	Unigene0009326	0.00105789	0.00802105	0.13189	0.02	0.1523
ORTHOMCL7007	Unigene0002227	Unigene0012639	Unigene0008812	Unigene0033956	Unigene0018361	Unigene0023305	Unigene0002891	Unigene0012123	Unigene0038720	Unigene0020651	Unigene0034813	0.0005	0.00378947	0.131944	0.0096	0.0721
ORTHOMCL10064	Unigene0008478	Unigene0033057	Unigene0021497	Unigene0021913	Unigene0028154	Unigene0023512	Unigene0019511	Unigene0036003	Unigene0035941	Unigene0027190	Unigene0030723	0.00115789	0.00877368	0.131974	0.022	0.1666
ORTHOMCL8594	Unigene0018828	Unigene0037931	Unigene0039713	Unigene0010413	Unigene0027022	Unigene0018288	Unigene0029236	Unigene0045136	Unigene0026205	Unigene0003983	Unigene0013951	0.00203158	0.0153789	0.132101	0.0386	0.2923
ORTHOMCL4736	Unigene0029523	Unigene0000828	Unigene0025463	Unigene0031784	Unigene0000156	Unigene0001461	Unigene0027347	Unigene0042248	Unigene0025499	Unigene0018812	Unigene0029232	0.00232105	0.0175632	0.132155	0.0441	0.3339
ORTHOMCL9142	Unigene0044558	Unigene0021418	Unigene0042096	Unigene0033698	Unigene0024417	Unigene0018184	Unigene0030664	Unigene0027438	Unigene0025261	Unigene0005025	Unigene0031765	0.00102632	0.00776316	0.132203	0.0196	0.1475
ORTHOMCL7001	Unigene0040868	Unigene0018411	Unigene0004811	Unigene0004567	Unigene0002222	Unigene0024659	Unigene0005378	Unigene0022068	Unigene0039778	Unigene0045364	Unigene0032037	0.00108421	0.0082	0.132221	0.0206	0.1557
ORTHOMCL4813	Unigene0005485	Unigene0036193	Unigene0042876	Unigene0008155	Unigene0000230	Unigene0000203	Unigene0042101	Unigene0037308	Unigene0015432	Unigene0046118	Unigene0003330	0.00140526	0.0106211	0.132309	0.0266	0.2019
ORTHOMCL9615	Unigene0040882	Unigene0032860	Unigene0011866	Unigene0020240	Unigene0006414	Unigene0011200	Unigene0041793	Unigene0018393	Unigene0036993	Unigene0039688	Unigene0037129	0.00320526	0.0242211	0.132334	0.0608	0.4602
ORTHOMCL4695	Unigene0001784	Unigene0000676	Unigene0000628	Unigene0000883	Unigene0000132	Unigene0000143	Unigene0000723	Unigene0000215	Unigene0001035	Unigene0000880	Unigene0000865	0.00178421	0.0134789	0.13237	0.0338	0.2562
ORTHOMCL8990	Unigene0031323	Unigene0004724	Unigene0033197	Unigene0034313	Unigene0030344	Unigene0035052	Unigene0031333	Unigene0043204	Unigene0006315	Unigene0028364	Unigene0033642	0.00294211	0.0222158	0.132433	0.0558	0.4222
ORTHOMCL8986	Unigene0013486	Unigene0008355	Unigene0040078	Unigene0022291	Unigene0004715	Unigene0046814	Unigene0016969	Unigene0045847	Unigene0026645	Unigene0044932	Unigene0035167	0.00181579	0.0137	0.132539	0.0344	0.2602
ORTHOMCL5822	Unigene0013420	Unigene0039208	Unigene0002559	Unigene0024608	Unigene0046279	Unigene0044328	Unigene0003161	Unigene0042523	Unigene0042340	Unigene0001311	Unigene0001962	0.000831579	0.00626842	0.132662	0.0158	0.1191
ORTHOMCL9466	Unigene0034895	Unigene0031818	Unigene0026748	Unigene0030198	Unigene0030279	Unigene0036173	Unigene0037906	Unigene0005946	Unigene0029413	Unigene0042497	Unigene0025994	0.000705263	0.00531579	0.132673	0.0132	0.1009
ORTHOMCL5509	Unigene0011666	Unigene0020444	Unigene0037608	Unigene0034156	Unigene0046327	Unigene0000944	Unigene0004576	Unigene0001701	Unigene0025553	Unigene0029225	Unigene0031019	0.00443684	0.0334368	0.132693	0.0843	0.6353
ORTHOMCL4924	Unigene0041034	Unigene0019999	Unigene0036018	Unigene0032603	Unigene0025196	Unigene0031494	Unigene0000264	Unigene0023600	Unigene0034887	Unigene0023272	Unigene0024089	0.00226842	0.0170842	0.132779	0.043	0.3245
ORTHOMCL10665	Unigene0023395	Unigene0033968	Unigene0014846	Unigene0036472	Unigene0043150	Unigene0040102	Unigene0044157	Unigene0041721	Unigene0026313	Unigene0030569	Unigene0035786	0.00215789	0.0162316	0.132944	0.0412	0.3084
ORTHOMCL7742	Unigene0037080	Unigene0002957	Unigene0041652	Unigene0010847	Unigene0020186	Unigene0006584	Unigene0028861	Unigene0030554	Unigene0009331	Unigene0016033	Unigene0017959	0.00732632	0.0550579	0.133066	0.1392	1.0461
ORTHOMCL9910	Unigene0039554	Unigene0032177	Unigene0007683	Unigene0018304	Unigene0037234	Unigene0007978	Unigene0020056	Unigene0044236	Unigene0026644	Unigene0029119	Unigene0028266	0.00105263	0.00791053	0.133067	0.0201	0.1503
ORTHOMCL5681	Unigene0005068	Unigene0038720	Unigene0001846	Unigene0021097	Unigene0017444	Unigene0006221	Unigene0046961	Unigene0019053	Unigene0008120	Unigene0048108	Unigene0001181	0.00187895	0.0141105	0.133159	0.0358	0.2681
ORTHOMCL8504	Unigene0031450	Unigene0020221	Unigene0021443	Unigene0026083	Unigene0029519	Unigene0029599	Unigene0026903	Unigene0016597	Unigene0003857	Unigene0014366	Unigene0035603	0.00134211	0.0100684	0.133298	0.0254	0.1913
ORTHOMCL6210	Unigene0003567	Unigene0033958	Unigene0038573	Unigene0002140	Unigene0045667	Unigene0046693	Unigene0046541	Unigene0005017	Unigene0023053	Unigene0044705	Unigene0001608	0.00241579	0.0181158	0.133353	0.0458	0.3441
ORTHOMCL10188	Unigene0044040	Unigene0013827	Unigene0029005	Unigene0035535	Unigene0030971	Unigene0009515	Unigene0014994	Unigene0037412	Unigene0010466	Unigene0021022	Unigene0023528	0.00169474	0.0126947	0.133499	0.0321	0.2411
ORTHOMCL7002	Unigene0010881	Unigene0029294	Unigene0039935	Unigene0005349	Unigene0043877	Unigene0044725	Unigene0043851	Unigene0002223	Unigene0030393	Unigene0043018	Unigene0034079	0.000931579	0.00697368	0.133585	0.0178	0.1325
ORTHOMCL10198	Unigene0037148	Unigene0040156	Unigene0038592	Unigene0009568	Unigene0043749	Unigene0035438	Unigene0034586	Unigene0018729	Unigene0037192	Unigene0012604	Unigene0036319	0.00472632	0.0353737	0.133611	0.09	0.672
ORTHOMCL4918	Unigene0045896	Unigene0040283	Unigene0006158	Unigene0019092	Unigene0002821	Unigene0011794	Unigene0016440	Unigene0000260	Unigene0018216	Unigene0016008	Unigene0014933	0.00124211	0.00929474	0.133635	0.0236	0.1766
ORTHOMCL9895	Unigene0045773	Unigene0030027	Unigene0021275	Unigene0017892	Unigene0037731	Unigene0009669	Unigene0021375	Unigene0040612	Unigene0033044	Unigene0007612	Unigene0015670	0.00217895	0.0163	0.133678	0.0411	0.3097
ORTHOMCL9599	Unigene0014370	Unigene0006392	Unigene0040590	Unigene0024220	Unigene0022232	Unigene0041514	Unigene0023356	Unigene0028978	Unigene0026029	Unigene0028479	Unigene0028926	0.00449474	0.0336211	0.133688	0.0854	0.6388
ORTHOMCL4851	Unigene0001774	Unigene0000222	Unigene0041452	Unigene0000311	Unigene0045462	Unigene0010103	Unigene0005897	Unigene0044714	Unigene0000325	Unigene0002608	Unigene0032351	0.00258947	0.0193632	0.133732	0.049	0.3679
ORTHOMCL5979	Unigene0001431	Unigene0039476	Unigene0025106	Unigene0004854	Unigene0023932	Unigene0026152	Unigene0005843	Unigene0003656	Unigene0010482	Unigene0001718	Unigene0016995	0.00348947	0.0260737	0.133831	0.0662	0.4956
ORTHOMCL4359	Unigene0006103	Unigene0014877	Unigene0003576	Unigene0000001	Unigene0007794	Unigene0009974	Unigene0009527	Unigene0005739	Unigene0005508	Unigene0000993	Unigene0011877	0.00455263	0.0339947	0.133922	0.0864	0.646
ORTHOMCL9998	Unigene0040515	Unigene0011776	Unigene0008157	Unigene0036228	Unigene0043788	Unigene0044888	Unigene0039955	Unigene0008292	Unigene0040248	Unigene0047293	Unigene0034717	0.000778947	0.00581579	0.133937	0.0149	0.1105
ORTHOMCL10579	Unigene0021342	Unigene0040851	Unigene0033393	Unigene0032086	Unigene0043911	Unigene0023095	Unigene0029987	Unigene0035455	Unigene0013519	Unigene0026680	Unigene0031118	0.000526316	0.00392632	0.134048	0.0101	0.0747
ORTHOMCL9504	Unigene0032664	Unigene0006075	Unigene0026190	Unigene0024071	Unigene0009100	Unigene0041432	Unigene0025031	Unigene0013662	Unigene0038942	Unigene0019317	Unigene0032674	0.00184211	0.0137368	0.1341	0.0351	0.2609
ORTHOMCL6792	Unigene0018322	Unigene0037153	Unigene0002051	Unigene0037427	Unigene0040497	Unigene0030961	Unigene0004931	Unigene0015547	Unigene0003007	Unigene0027366	Unigene0033892	0.00213158	0.0158789	0.134239	0.0405	0.3018
ORTHOMCL6071	Unigene0027639	Unigene0029409	Unigene0039151	Unigene0001500	Unigene0028710	Unigene0006325	Unigene0045815	Unigene0003425	Unigene0032158	Unigene0027427	Unigene0015689	0.00502632	0.0374421	0.134242	0.0957	0.7115
ORTHOMCL10571	Unigene0046011	Unigene0038525	Unigene0021968	Unigene0025569	Unigene0013394	Unigene0024178	Unigene0023680	Unigene0027828	Unigene0021729	Unigene0023403	Unigene0018550	0.00414211	0.0308474	0.134277	0.0788	0.5861
ORTHOMCL4545	Unigene0001192	Unigene0041272	Unigene0016006	Unigene0013403	Unigene0000918	Unigene0021277	Unigene0000067	Unigene0001476	Unigene0035970	Unigene0022337	Unigene0026137	0.00307368	0.0228842	0.134315	0.0583	0.4346
ORTHOMCL5821	Unigene0043867	Unigene0031528	Unigene0034819	Unigene0024130	Unigene0017601	Unigene0028702	Unigene0034289	Unigene0040532	Unigene0001311	Unigene0045738	Unigene0033126	0.0009	0.0067	0.134328	0.0171	0.1274
ORTHOMCL7470	Unigene0041910	Unigene0016284	Unigene0043465	Unigene0026173	Unigene0007475	Unigene0041235	Unigene0027505	Unigene0004018	Unigene0005700	Unigene0017698	Unigene0002669	0.000889474	0.00662105	0.13434	0.0169	0.1258
ORTHOMCL10990	Unigene0033069	Unigene0040299	Unigene0037335	Unigene0039006	Unigene0046250	Unigene0032726	Unigene0044914	Unigene0041897	Unigene0033164	Unigene0045649	Unigene0029714	0.00303684	0.0225947	0.134405	0.0576	0.4291
ORTHOMCL10805	Unigene0035734	Unigene0018028	Unigene0030020	Unigene0030361	Unigene0036542	Unigene0033252	Unigene0045858	Unigene0034430	Unigene0028296	Unigene0035300	Unigene0027104	0.00107895	0.00802632	0.134426	0.0207	0.1527
ORTHOMCL7184	Unigene0039220	Unigene0016785	Unigene0025812	Unigene0002394	Unigene0002882	Unigene0034101	Unigene0036472	Unigene0046831	Unigene0013278	Unigene0040936	Unigene0013320	0.0009	0.00669474	0.134434	0.0172	0.1272
ORTHOMCL9552	Unigene0040307	Unigene0007224	Unigene0021769	Unigene0022942	Unigene0023874	Unigene0029180	Unigene0006247	Unigene0031334	Unigene0016118	Unigene0041080	Unigene0028152	0.00131579	0.00977895	0.134553	0.025	0.1858
ORTHOMCL10194	Unigene0041750	Unigene0031972	Unigene0014777	Unigene0012856	Unigene0012067	Unigene0019365	Unigene0017746	Unigene0040884	Unigene0029248	Unigene0042374	Unigene0009533	0.000789474	0.00586316	0.13465	0.0151	0.1115
ORTHOMCL10080	Unigene0034852	Unigene0018077	Unigene0042722	Unigene0011885	Unigene0010561	Unigene0008610	Unigene0023419	Unigene0041304	Unigene0027320	Unigene0010883	Unigene0013462	0.00104211	0.00773684	0.134694	0.02	0.147
ORTHOMCL8851	Unigene0038276	Unigene0004461	Unigene0005617	Unigene0020641	Unigene0042932	Unigene0020673	Unigene0020429	Unigene0040401	Unigene0019939	Unigene0026776	Unigene0025923	0.00141053	0.0104684	0.134741	0.0267	0.1989
ORTHOMCL7616	Unigene0045500	Unigene0012431	Unigene0034599	Unigene0040726	Unigene0043903	Unigene0046083	Unigene0045174	Unigene0002803	Unigene0039886	Unigene0044156	Unigene0034416	0.00482105	0.0357474	0.134865	0.0918	0.6793
ORTHOMCL7562	Unigene0034403	Unigene0002750	Unigene0015756	Unigene0035740	Unigene0006212	Unigene0003272	Unigene0047695	Unigene0004449	Unigene0006951	Unigene0007964	Unigene0016822	0.000673684	0.00499474	0.134879	0.0128	0.0951
ORTHOMCL10802	Unigene0037079	Unigene0024751	Unigene0033058	Unigene0033027	Unigene0041707	Unigene0028200	Unigene0017960	Unigene0025975	Unigene0036623	Unigene0035010	Unigene0027777	0.00286316	0.0212158	0.134954	0.0545	0.4031
ORTHOMCL9110	Unigene0033756	Unigene0007064	Unigene0014757	Unigene0005124	Unigene0004972	Unigene0012945	Unigene0007306	Unigene0017320	Unigene0034905	Unigene0042914	Unigene0039601	0.000373684	0.00276842	0.134981	0.0071	0.0525
ORTHOMCL5116	Unigene0044309	Unigene0004884	Unigene0042089	Unigene0006272	Unigene0000422	Unigene0033570	Unigene0041978	Unigene0018805	Unigene0032929	Unigene0041432	Unigene0003788	0.00116316	0.00860526	0.135168	0.0221	0.1636
ORTHOMCL5669	Unigene0008688	Unigene0017850	Unigene0040936	Unigene0001169	Unigene0003504	Unigene0023282	Unigene0003163	Unigene0029125	Unigene0020135	Unigene0014630	Unigene0005166	0.00438947	0.0324684	0.135192	0.0834	0.6168
ORTHOMCL9728	Unigene0039502	Unigene0006852	Unigene0009183	Unigene0013131	Unigene0013515	Unigene0030683	Unigene0011160	Unigene0040214	Unigene0029090	Unigene0022864	Unigene0011150	0.00147368	0.0108895	0.135331	0.0281	0.207
ORTHOMCL10782	Unigene0018104	Unigene0022480	Unigene0019097	Unigene0035743	Unigene0041639	Unigene0040804	Unigene0044983	Unigene0028430	Unigene0033501	Unigene0030887	Unigene0017319	0.000589474	0.00435263	0.135429	0.0112	0.0826
ORTHOMCL7803	Unigene0028064	Unigene0035606	Unigene0041844	Unigene0008896	Unigene0013231	Unigene0025584	Unigene0003018	Unigene0006754	Unigene0036118	Unigene0026229	Unigene0036966	0.00267368	0.0197	0.13572	0.0508	0.3743
ORTHOMCL5267	Unigene0004872	Unigene0033034	Unigene0037676	Unigene0005696	Unigene0027644	Unigene0025897	Unigene0013365	Unigene0000547	Unigene0039938	Unigene0048259	Unigene0029222	0.00196842	0.0145	0.135753	0.0374	0.2756
ORTHOMCL5619	Unigene0022308	Unigene0017212	Unigene0036699	Unigene0020837	Unigene0044792	Unigene0040608	Unigene0046002	Unigene0001119	Unigene0032781	Unigene0023661	Unigene0028732	0.00304737	0.0224421	0.135788	0.058	0.4263
ORTHOMCL4644	Unigene0008629	Unigene0032921	Unigene0025381	Unigene0000109	Unigene0038587	Unigene0017291	Unigene0014061	Unigene0009271	Unigene0013235	Unigene0032163	Unigene0030346	0.00147368	0.0108474	0.135856	0.028	0.2062
ORTHOMCL4373	Unigene0001819	Unigene0029421	Unigene0000738	Unigene0032513	Unigene0023241	Unigene0000733	Unigene0009452	Unigene0000671	Unigene0037853	Unigene0026836	Unigene0000005	0.00428947	0.0315421	0.135992	0.0813	0.5994
ORTHOMCL4888	Unigene0043135	Unigene0040280	Unigene0038807	Unigene0031625	Unigene0043001	Unigene0000242	Unigene0019538	Unigene0000600	Unigene0042038	Unigene0042406	Unigene0031237	0.00378947	0.0278579	0.136029	0.072	0.5293
ORTHOMCL4726	Unigene0041339	Unigene0001299	Unigene0000582	Unigene0035187	Unigene0000151	Unigene0041505	Unigene0000173	Unigene0042254	Unigene0034093	Unigene0030906	Unigene0029455	0.00428421	0.0314947	0.136029	0.0814	0.5985
ORTHOMCL4366	Unigene0004067	Unigene0035178	Unigene0004728	Unigene0020015	Unigene0004337	Unigene0003469	Unigene0046729	Unigene0044553	Unigene0000003	Unigene0041480	Unigene0036581	0.00252105	0.0185105	0.136196	0.0477	0.3518
ORTHOMCL10380	Unigene0011193	Unigene0034007	Unigene0019496	Unigene0034542	Unigene0035311	Unigene0024013	Unigene0013415	Unigene0029659	Unigene0032370	Unigene0021384	Unigene0035964	0.00288421	0.0211632	0.136285	0.0547	0.4021
ORTHOMCL6693	Unigene0043865	Unigene0019424	Unigene0027025	Unigene0031555	Unigene0046143	Unigene0016430	Unigene0034387	Unigene0009358	Unigene0001978	Unigene0028016	Unigene0016611	0.0135368	0.0992842	0.136344	0.2571	1.8864
ORTHOMCL5066	Unigene0041022	Unigene0032911	Unigene0036008	Unigene0004844	Unigene0045409	Unigene0005249	Unigene0034206	Unigene0005256	Unigene0000374	Unigene0005294	Unigene0031766	0.00285263	0.0208947	0.136524	0.0542	0.3969
ORTHOMCL5331	Unigene0000643	Unigene0033570	Unigene0036727	Unigene0033501	Unigene0022296	Unigene0027438	Unigene0021724	Unigene0042438	Unigene0034421	Unigene0027956	Unigene0031407	0.0744368	0.545047	0.136569	1.4142	10.356
ORTHOMCL6442	Unigene0043512	Unigene0008018	Unigene0037306	Unigene0002196	Unigene0042179	Unigene0043833	Unigene0001777	Unigene0026944	Unigene0019921	Unigene0048842	Unigene0035855	0.000573684	0.0042	0.136591	0.011	0.0799
ORTHOMCL10493	Unigene0037769	Unigene0033431	Unigene0032039	Unigene0031293	Unigene0043027	Unigene0012344	Unigene0016514	Unigene0030919	Unigene0034123	Unigene0033159	Unigene0020255	0.00337895	0.0247316	0.136625	0.064	0.4699
ORTHOMCL7916	Unigene0023358	Unigene0011916	Unigene0018601	Unigene0018380	Unigene0030725	Unigene0022563	Unigene0032241	Unigene0039532	Unigene0003120	Unigene0049433	Unigene0008459	0.000842105	0.00616316	0.136635	0.0159	0.1171
ORTHOMCL4618	Unigene0001091	Unigene0000098	Unigene0036639	Unigene0000988	Unigene0000284	Unigene0023454	Unigene0000711	Unigene0040613	Unigene0000597	Unigene0009163	Unigene0000118	0.00188947	0.0138263	0.136658	0.0359	0.2629
ORTHOMCL6902	Unigene0015730	Unigene0025783	Unigene0038392	Unigene0040626	Unigene0003600	Unigene0002142	Unigene0005931	Unigene0040129	Unigene0037647	Unigene0045193	Unigene0009960	0.00109474	0.00801053	0.136662	0.0207	0.1523
ORTHOMCL7812	Unigene0042351	Unigene0003025	Unigene0022241	Unigene0006364	Unigene0007864	Unigene0045030	Unigene0031019	Unigene0035072	Unigene0020394	Unigene0015861	Unigene0033046	0.003	0.0219474	0.136691	0.0571	0.4172
ORTHOMCL8999	Unigene0015125	Unigene0029647	Unigene0020210	Unigene0018136	Unigene0037693	Unigene0009754	Unigene0004737	Unigene0025686	Unigene0013444	Unigene0005378	Unigene0025256	0.000878947	0.00642632	0.136773	0.0166	0.1222
ORTHOMCL7968	Unigene0004283	Unigene0027169	Unigene0039673	Unigene0037342	Unigene0033097	Unigene0036291	Unigene0026489	Unigene0010294	Unigene0003371	Unigene0015776	Unigene0003178	0.000557895	0.00407895	0.136774	0.0106	0.0775
ORTHOMCL7628	Unigene0022822	Unigene0011489	Unigene0020279	Unigene0024493	Unigene0028374	Unigene0023033	Unigene0047622	Unigene0002817	Unigene0010186	Unigene0002856	Unigene0038734	0.000863158	0.00630526	0.136895	0.0166	0.1198
ORTHOMCL10924	Unigene0032984	Unigene0035848	Unigene0029173	Unigene0029466	Unigene0038661	Unigene0036479	Unigene0024874	Unigene0022474	Unigene0030170	Unigene0038389	Unigene0027279	0.000747368	0.00545789	0.136933	0.0142	0.1038
ORTHOMCL10952	Unigene0026456	Unigene0026191	Unigene0023926	Unigene0030471	Unigene0038922	Unigene0042078	Unigene0029800	Unigene0045145	Unigene0038977	Unigene0044346	Unigene0029956	0.00118947	0.00868421	0.13697	0.0228	0.165
ORTHOMCL8256	Unigene0026139	Unigene0028608	Unigene0021461	Unigene0014560	Unigene0036521	Unigene0030411	Unigene0030716	Unigene0003522	Unigene0034463	Unigene0041626	Unigene0030364	0.00250526	0.0182789	0.137057	0.0476	0.3471
ORTHOMCL4388	Unigene0001552	Unigene0000010	Unigene0000031	Unigene0032936	Unigene0046925	Unigene0041971	Unigene0022078	Unigene0040560	Unigene0000670	Unigene0032498	Unigene0022694	0.00516842	0.0376789	0.13717	0.0983	0.7159
ORTHOMCL8707	Unigene0025561	Unigene0041638	Unigene0004188	Unigene0012260	Unigene0006982	Unigene0045255	Unigene0034614	Unigene0033514	Unigene0014592	Unigene0009479	Unigene0015348	0.000610526	0.00444737	0.137278	0.0118	0.0847
ORTHOMCL6720	Unigene0035127	Unigene0019019	Unigene0033681	Unigene0037396	Unigene0041653	Unigene0003098	Unigene0030724	Unigene0043067	Unigene0002004	Unigene0043414	Unigene0037676	0.00152632	0.0111	0.137506	0.029	0.2111
ORTHOMCL5465	Unigene0027107	Unigene0021630	Unigene0020923	Unigene0010300	Unigene0036276	Unigene0031657	Unigene0037618	Unigene0000872	Unigene0041396	Unigene0047486	Unigene0032446	0.00146842	0.0106789	0.137506	0.0279	0.203
ORTHOMCL5482	Unigene0022173	Unigene0016302	Unigene0041397	Unigene0036910	Unigene0016026	Unigene0044568	Unigene0024299	Unigene0000893	Unigene0012339	Unigene0017801	Unigene0002365	0.00273684	0.0199	0.13753	0.0521	0.378
ORTHOMCL5330	Unigene0043857	Unigene0034966	Unigene0039550	Unigene0039093	Unigene0002266	Unigene0003384	Unigene0041603	Unigene0000641	Unigene0038100	Unigene0048851	Unigene0008445	0.00295789	0.0215053	0.137543	0.0563	0.4087
ORTHOMCL6441	Unigene0043901	Unigene0018488	Unigene0002784	Unigene0016522	Unigene0005679	Unigene0001777	Unigene0002371	Unigene0021634	Unigene0031720	Unigene0047964	Unigene0030025	0.00131579	0.00956316	0.137589	0.0248	0.1818
ORTHOMCL6424	Unigene0017985	Unigene0036357	Unigene0034724	Unigene0035330	Unigene0026548	Unigene0025471	Unigene0001763	Unigene0025852	Unigene0033723	Unigene0024352	Unigene0022147	0.00115263	0.00836316	0.137823	0.0217	0.159
ORTHOMCL10976	Unigene0026091	Unigene0036299	Unigene0035590	Unigene0031490	Unigene0029221	Unigene0029529	Unigene0043203	Unigene0028663	Unigene0033294	Unigene0027430	Unigene0028521	0.00153158	0.0111053	0.137915	0.0289	0.2108
ORTHOMCL4834	Unigene0024346	Unigene0032974	Unigene0029656	Unigene0000711	Unigene0040712	Unigene0024166	Unigene0000213	Unigene0002117	Unigene0000419	Unigene0044429	Unigene0001051	0.00352632	0.0255684	0.137917	0.067	0.4859
ORTHOMCL7988	Unigene0012414	Unigene0013762	Unigene0005073	Unigene0039375	Unigene0004843	Unigene0043495	Unigene0003204	Unigene0042240	Unigene0036609	Unigene0005781	Unigene0034412	0.000852632	0.00617895	0.13799	0.0163	0.1175
ORTHOMCL6025	Unigene0002733	Unigene0032340	Unigene0039430	Unigene0039450	Unigene0036796	Unigene0030422	Unigene0003013	Unigene0047010	Unigene0038283	Unigene0044753	Unigene0001470	0.00146842	0.0106368	0.13805	0.0279	0.2022
ORTHOMCL9968	Unigene0038522	Unigene0008001	Unigene0040947	Unigene0021554	Unigene0040888	Unigene0030629	Unigene0043275	Unigene0047009	Unigene0034669	Unigene0048986	Unigene0033965	0.00109474	0.00792105	0.138206	0.0209	0.1506
ORTHOMCL5548	Unigene0001018	Unigene0007539	Unigene0009449	Unigene0002293	Unigene0032663	Unigene0017353	Unigene0032425	Unigene0017228	Unigene0018493	Unigene0019302	Unigene0032646	0.00446316	0.0322789	0.138268	0.0848	0.6134
ORTHOMCL6984	Unigene0002210	Unigene0040140	Unigene0043496	Unigene0024728	Unigene0017955	Unigene0046617	Unigene0047982	Unigene0007525	Unigene0019415	Unigene0011203	Unigene0008505	0.00366842	0.0265105	0.138376	0.0698	0.5037
ORTHOMCL5395	Unigene0000759	Unigene0000926	Unigene0011829	Unigene0035005	Unigene0029809	Unigene0028974	Unigene0011908	Unigene0000886	Unigene0037495	Unigene0045673	Unigene0028512	0.00247895	0.0179053	0.138448	0.0469	0.3404
ORTHOMCL7327	Unigene0004635	Unigene0034972	Unigene0041743	Unigene0035917	Unigene0017180	Unigene0006337	Unigene0013746	Unigene0008236	Unigene0034941	Unigene0006273	Unigene0002531	0.000505263	0.00364737	0.138528	0.0097	0.0693
ORTHOMCL9315	Unigene0011286	Unigene0017368	Unigene0024362	Unigene0010392	Unigene0012636	Unigene0015652	Unigene0005487	Unigene0039228	Unigene0016287	Unigene0024988	Unigene0016347	0.00177895	0.0128368	0.138581	0.0339	0.2439
ORTHOMCL9138	Unigene0032809	Unigene0010274	Unigene0010075	Unigene0005020	Unigene0016908	Unigene0039644	Unigene0018879	Unigene0024167	Unigene0011983	Unigene0020707	Unigene0022354	0.00214211	0.0154474	0.138671	0.0407	0.2936
ORTHOMCL8367	Unigene0044678	Unigene0012013	Unigene0042805	Unigene0010451	Unigene0012008	Unigene0025936	Unigene0011461	Unigene0011002	Unigene0011397	Unigene0007285	Unigene0003661	0.0029	0.0209	0.138756	0.0552	0.3972
ORTHOMCL10900	Unigene0024750	Unigene0029355	Unigene0033990	Unigene0020934	Unigene0029392	Unigene0028091	Unigene0042922	Unigene0041551	Unigene0042173	Unigene0029799	Unigene0026867	0.000563158	0.00405789	0.138781	0.0107	0.0772
ORTHOMCL7979	Unigene0004243	Unigene0009916	Unigene0008482	Unigene0021008	Unigene0031569	Unigene0028046	Unigene0005942	Unigene0003195	Unigene0042050	Unigene0007395	Unigene0006831	0.00128947	0.00928947	0.13881	0.0245	0.1765
ORTHOMCL7997	Unigene0017397	Unigene0003215	Unigene0004781	Unigene0008510	Unigene0003509	Unigene0033010	Unigene0045538	Unigene0025741	Unigene0015111	Unigene0034963	Unigene0023178	0.000810526	0.00583684	0.138864	0.0154	0.1111
ORTHOMCL10332	Unigene0021417	Unigene0025315	Unigene0016094	Unigene0040973	Unigene0015093	Unigene0010726	Unigene0017495	Unigene0026432	Unigene0030372	Unigene0040874	Unigene0014986	0.000610526	0.00439474	0.138922	0.0117	0.0836
ORTHOMCL9794	Unigene0008588	Unigene0033907	Unigene0007594	Unigene0011769	Unigene0039846	Unigene0028480	Unigene0020544	Unigene0027617	Unigene0007151	Unigene0011753	Unigene0019185	0.00242632	0.0174526	0.139023	0.0462	0.3316
ORTHOMCL8478	Unigene0045560	Unigene0016893	Unigene0027012	Unigene0019625	Unigene0046258	Unigene0011864	Unigene0042202	Unigene0042688	Unigene0019716	Unigene0003808	Unigene0018325	0.000636842	0.00457895	0.13908	0.0121	0.0871
ORTHOMCL7283	Unigene0017627	Unigene0002984	Unigene0002494	Unigene0031351	Unigene0011579	Unigene0011641	Unigene0044410	Unigene0045224	Unigene0034616	Unigene0033515	Unigene0015888	0.00133158	0.00957368	0.139087	0.0254	0.1818
ORTHOMCL9598	Unigene0031142	Unigene0037587	Unigene0023104	Unigene0034726	Unigene0006390	Unigene0016107	Unigene0023921	Unigene0026902	Unigene0013909	Unigene0049233	Unigene0013752	0.00417895	0.0300158	0.139225	0.0794	0.5702
ORTHOMCL6381	Unigene0009415	Unigene0038516	Unigene0001735	Unigene0017493	Unigene0044844	Unigene0046610	Unigene0004075	Unigene0040556	Unigene0041500	Unigene0002887	Unigene0010861	0.000768421	0.00551579	0.139313	0.0146	0.1048
ORTHOMCL8303	Unigene0025421	Unigene0012760	Unigene0034255	Unigene0020960	Unigene0022602	Unigene0027866	Unigene0023256	Unigene0003574	Unigene0040705	Unigene0021071	Unigene0022801	0.00188947	0.0135579	0.139363	0.0359	0.2576
ORTHOMCL10793	Unigene0032321	Unigene0039783	Unigene0017806	Unigene0032628	Unigene0043369	Unigene0032221	Unigene0041346	Unigene0044458	Unigene0033491	Unigene0033250	Unigene0032617	0.00207368	0.0148737	0.13942	0.0395	0.2826
ORTHOMCL10666	Unigene0039505	Unigene0035587	Unigene0020846	Unigene0033775	Unigene0027468	Unigene0039699	Unigene0032955	Unigene0034885	Unigene0036041	Unigene0027582	Unigene0014854	0.00344737	0.0247263	0.139421	0.0656	0.4699
ORTHOMCL9372	Unigene0027800	Unigene0034087	Unigene0039536	Unigene0005642	Unigene0042617	Unigene0041441	Unigene0047764	Unigene0042870	Unigene0032155	Unigene0047991	Unigene0037053	0.0012	0.00860526	0.13945	0.0228	0.1635
ORTHOMCL8480	Unigene0042051	Unigene0025812	Unigene0003810	Unigene0032526	Unigene0025147	Unigene0014078	Unigene0028299	Unigene0026703	Unigene0036505	Unigene0030474	Unigene0034694	0.00178947	0.0128263	0.139516	0.034	0.2438
ORTHOMCL9445	Unigene0043066	Unigene0023684	Unigene0005844	Unigene0009081	Unigene0041897	Unigene0042448	Unigene0042845	Unigene0045619	Unigene0041087	Unigene0009578	Unigene0036029	0.00302105	0.0216421	0.139591	0.0573	0.4113
ORTHOMCL5459	Unigene0024498	Unigene0011202	Unigene0036597	Unigene0000862	Unigene0021837	Unigene0045061	Unigene0024897	Unigene0012817	Unigene0032407	Unigene0048582	Unigene0038082	0.00254211	0.0182053	0.139636	0.0483	0.346
ORTHOMCL4583	Unigene0035581	Unigene0014075	Unigene0032182	Unigene0006389	Unigene0035327	Unigene0033088	Unigene0000082	Unigene0003777	Unigene0006977	Unigene0034908	Unigene0024678	0.00166842	0.0119316	0.139832	0.0317	0.2267
ORTHOMCL6494	Unigene0001850	Unigene0041451	Unigene0010461	Unigene0001816	Unigene0045015	Unigene0042013	Unigene0045970	Unigene0040739	Unigene0017589	Unigene0031226	Unigene0013373	0.000694737	0.00496316	0.139979	0.0133	0.0943
ORTHOMCL9260	Unigene0016178	Unigene0033718	Unigene0006527	Unigene0035654	Unigene0045750	Unigene0016765	Unigene0019094	Unigene0042534	Unigene0037591	Unigene0047403	Unigene0005300	0.00194211	0.0138474	0.140251	0.037	0.2629
ORTHOMCL9470	Unigene0005950	Unigene0033150	Unigene0031317	Unigene0027253	Unigene0041061	Unigene0009989	Unigene0043797	Unigene0038152	Unigene0016643	Unigene0042657	Unigene0008080	0.000784211	0.00558947	0.140301	0.015	0.1063
ORTHOMCL6099	Unigene0013436	Unigene0034602	Unigene0022509	Unigene0001517	Unigene0009550	Unigene0045189	Unigene0045263	Unigene0036333	Unigene0033868	Unigene0043875	Unigene0038267	0.00245789	0.0175158	0.140325	0.0467	0.3328
ORTHOMCL7696	Unigene0030029	Unigene0011159	Unigene0043835	Unigene0014989	Unigene0002894	Unigene0012249	Unigene0017801	Unigene0025534	Unigene0040575	Unigene0027061	Unigene0029392	0.00286842	0.0204	0.140609	0.0542	0.3875
ORTHOMCL8254	Unigene0017283	Unigene0011335	Unigene0043821	Unigene0010046	Unigene0043503	Unigene0040150	Unigene0046712	Unigene0003521	Unigene0006903	Unigene0045021	Unigene0035349	0.000994737	0.00705789	0.14094	0.0188	0.1339
ORTHOMCL10102	Unigene0013742	Unigene0040599	Unigene0037452	Unigene0033768	Unigene0044073	Unigene0042178	Unigene0044463	Unigene0008778	Unigene0026118	Unigene0032967	Unigene0037519	0.000636842	0.00451579	0.141026	0.0122	0.0858
ORTHOMCL8370	Unigene0043847	Unigene0032868	Unigene0035785	Unigene0036840	Unigene0003667	Unigene0046362	Unigene0012532	Unigene0011449	Unigene0023787	Unigene0033257	Unigene0034739	0.00224211	0.0158789	0.1412	0.0427	0.3016
ORTHOMCL8469	Unigene0039542	Unigene0033460	Unigene0006150	Unigene0003800	Unigene0017858	Unigene0029958	Unigene0047553	Unigene0022663	Unigene0025215	Unigene0024842	Unigene0018138	0.000542105	0.00383158	0.141484	0.0103	0.0729
ORTHOMCL5028	Unigene0034839	Unigene0019521	Unigene0002093	Unigene0031432	Unigene0006647	Unigene0036093	Unigene0002981	Unigene0000345	Unigene0038785	Unigene0010207	Unigene0006749	0.000668421	0.00471053	0.141899	0.0127	0.0895
ORTHOMCL5179	Unigene0041059	Unigene0023904	Unigene0042113	Unigene0035877	Unigene0000470	Unigene0044946	Unigene0022400	Unigene0027931	Unigene0021749	Unigene0045680	Unigene0032175	0.000794737	0.0056	0.141917	0.0151	0.1063
ORTHOMCL10810	Unigene0040025	Unigene0034536	Unigene0036567	Unigene0026507	Unigene0046706	Unigene0042099	Unigene0029546	Unigene0027886	Unigene0032099	Unigene0018141	Unigene0034484	0.00532105	0.0374579	0.142054	0.1009	0.7118
ORTHOMCL9429	Unigene0042473	Unigene0038762	Unigene0037585	Unigene0032869	Unigene0043432	Unigene0043263	Unigene0044171	Unigene0005797	Unigene0015026	Unigene0027311	Unigene0034855	0.0014	0.00984737	0.14217	0.0266	0.1872
ORTHOMCL6104	Unigene0038849	Unigene0035179	Unigene0028678	Unigene0001523	Unigene0024461	Unigene0042984	Unigene0044891	Unigene0033039	Unigene0039753	Unigene0030692	Unigene0004531	0.000773684	0.00543684	0.142304	0.0147	0.1033
ORTHOMCL8450	Unigene0039365	Unigene0025505	Unigene0035473	Unigene0031306	Unigene0012406	Unigene0028808	Unigene0029308	Unigene0043448	Unigene0003780	Unigene0013408	Unigene0030300	0.00309474	0.0217474	0.142304	0.0589	0.4132
ORTHOMCL7645	Unigene0026862	Unigene0003683	Unigene0030053	Unigene0003316	Unigene0036473	Unigene0036259	Unigene0040152	Unigene0002834	Unigene0013408	Unigene0036694	Unigene0024873	0.000473684	0.00332632	0.142405	0.009	0.0633
ORTHOMCL6231	Unigene0044270	Unigene0011900	Unigene0040208	Unigene0035819	Unigene0045738	Unigene0001819	Unigene0047777	Unigene0005224	Unigene0011703	Unigene0001624	Unigene0037045	0.00217895	0.0153	0.142415	0.0414	0.2908
ORTHOMCL10416	Unigene0044225	Unigene0019527	Unigene0021609	Unigene0024575	Unigene0040808	Unigene0038067	Unigene0011634	Unigene0014368	Unigene0027715	Unigene0033111	Unigene0027077	0.00143158	0.0100474	0.142483	0.0273	0.1909
ORTHOMCL8756	Unigene0043252	Unigene0004267	Unigene0007603	Unigene0018370	Unigene0019827	Unigene0014537	Unigene0007110	Unigene0046435	Unigene0006408	Unigene0031895	Unigene0010705	0.00108421	0.00760526	0.142561	0.0206	0.1445
ORTHOMCL8722	Unigene0025604	Unigene0039859	Unigene0017040	Unigene0037551	Unigene0030576	Unigene0004211	Unigene0007731	Unigene0041200	Unigene0035047	Unigene0016924	Unigene0018057	0.00256316	0.0179579	0.142732	0.0487	0.3412
ORTHOMCL6453	Unigene0040010	Unigene0032936	Unigene0037390	Unigene0001786	Unigene0026544	Unigene0027276	Unigene0028064	Unigene0013988	Unigene0006103	Unigene0030480	Unigene0011294	0.00138421	0.00969474	0.14278	0.0264	0.1841
ORTHOMCL8917	Unigene0023642	Unigene0037614	Unigene0017515	Unigene0034493	Unigene0021085	Unigene0038419	Unigene0020981	Unigene0004564	Unigene0017342	Unigene0019459	Unigene0028657	0.00372632	0.0260895	0.142828	0.0709	0.4956
ORTHOMCL5340	Unigene0000682	Unigene0034182	Unigene0032762	Unigene0021384	Unigene0032342	Unigene0000657	Unigene0000733	Unigene0044359	Unigene0031065	Unigene0001169	Unigene0034864	0.00122632	0.00857895	0.142945	0.0233	0.1631
ORTHOMCL8328	Unigene0007956	Unigene0041223	Unigene0004519	Unigene0036849	Unigene0003604	Unigene0006428	Unigene0016005	Unigene0010461	Unigene0005951	Unigene0006982	Unigene0039806	0.00110526	0.00773158	0.142954	0.021	0.1469
ORTHOMCL8358	Unigene0027690	Unigene0021178	Unigene0012903	Unigene0005772	Unigene0029049	Unigene0011570	Unigene0023046	Unigene0003646	Unigene0031810	Unigene0016416	Unigene0015686	0.000889474	0.00622105	0.142978	0.0171	0.1182
ORTHOMCL8840	Unigene0046066	Unigene0039333	Unigene0010704	Unigene0038895	Unigene0033925	Unigene0045547	Unigene0004443	Unigene0036258	Unigene0014564	Unigene0038130	Unigene0026019	0.00235263	0.0164421	0.143086	0.0447	0.3126
ORTHOMCL5388	Unigene0037570	Unigene0002502	Unigene0021794	Unigene0029217	Unigene0038891	Unigene0011780	Unigene0014938	Unigene0000749	Unigene0022065	Unigene0008556	Unigene0028244	0.00482632	0.0337263	0.143102	0.0917	0.6409
ORTHOMCL10257	Unigene0011030	Unigene0024238	Unigene0032494	Unigene0029381	Unigene0010107	Unigene0037574	Unigene0035724	Unigene0037844	Unigene0027427	Unigene0041276	Unigene0027140	0.00122105	0.00852632	0.14321	0.0232	0.1622
ORTHOMCL9485	Unigene0044621	Unigene0005989	Unigene0038163	Unigene0026724	Unigene0042599	Unigene0041279	Unigene0034852	Unigene0008228	Unigene0026533	Unigene0024818	Unigene0032282	0.00170526	0.0119053	0.143236	0.0322	0.2261
ORTHOMCL4940	Unigene0002691	Unigene0003117	Unigene0002354	Unigene0037771	Unigene0041469	Unigene0006126	Unigene0000274	Unigene0036223	Unigene0038901	Unigene0039795	Unigene0007003	0.00164737	0.0114947	0.143315	0.0314	0.2183
ORTHOMCL5872	Unigene0005267	Unigene0028296	Unigene0033808	Unigene0009326	Unigene0005625	Unigene0043774	Unigene0001367	Unigene0015671	Unigene0003644	Unigene0046647	Unigene0040005	0.000636842	0.00444211	0.143365	0.012	0.0844
ORTHOMCL7433	Unigene0040402	Unigene0002630	Unigene0034885	Unigene0021811	Unigene0018943	Unigene0017941	Unigene0020697	Unigene0016116	Unigene0010041	Unigene0027266	Unigene0029753	0.00241579	0.0168368	0.143482	0.0459	0.32
ORTHOMCL5471	Unigene0011800	Unigene0003963	Unigene0024860	Unigene0039515	Unigene0046380	Unigene0012551	Unigene0016532	Unigene0021913	Unigene0000882	Unigene0000887	Unigene0036779	0.00254737	0.0177474	0.143535	0.0485	0.3373
ORTHOMCL6656	Unigene0020318	Unigene0001952	Unigene0004398	Unigene0018518	Unigene0012803	Unigene0030373	Unigene0026432	Unigene0012489	Unigene0027440	Unigene0034150	Unigene0037994	0.000905263	0.00630526	0.143573	0.0171	0.1197
ORTHOMCL4509	Unigene0039907	Unigene0010384	Unigene0010706	Unigene0018842	Unigene0012793	Unigene0000054	Unigene0000059	Unigene0046508	Unigene0004270	Unigene0028017	Unigene0004420	0.00274737	0.0191105	0.143762	0.0521	0.3632
ORTHOMCL8971	Unigene0028719	Unigene0028707	Unigene0036904	Unigene0032270	Unigene0004683	Unigene0020407	Unigene0035643	Unigene0028266	Unigene0017359	Unigene0026772	Unigene0033735	0.00390526	0.0271316	0.143938	0.0743	0.5156
ORTHOMCL4978	Unigene0039842	Unigene0006279	Unigene0003734	Unigene0038126	Unigene0047286	Unigene0000761	Unigene0000304	Unigene0001247	Unigene0033455	Unigene0009730	Unigene0034185	0.0538105	0.373479	0.144079	1.0225	7.0963
ORTHOMCL8876	Unigene0039311	Unigene0014439	Unigene0005090	Unigene0037532	Unigene0044939	Unigene0046988	Unigene0042337	Unigene0031172	Unigene0033401	Unigene0004499	Unigene0020393	0.00110526	0.00766842	0.144132	0.0212	0.1457
ORTHOMCL6696	Unigene0005203	Unigene0012469	Unigene0004591	Unigene0040718	Unigene0007957	Unigene0004551	Unigene0042727	Unigene0001980	Unigene0002459	Unigene0002350	Unigene0037434	0.000647368	0.00448947	0.144197	0.0121	0.0853
ORTHOMCL4500	Unigene0001573	Unigene0000265	Unigene0020462	Unigene0000860	Unigene0019921	Unigene0040024	Unigene0005400	Unigene0000870	Unigene0000119	Unigene0000052	Unigene0000572	0.00266842	0.0184895	0.144321	0.0507	0.3514
ORTHOMCL9218	Unigene0038017	Unigene0005192	Unigene0037378	Unigene0027222	Unigene0020019	Unigene0030476	Unigene0042767	Unigene0046016	Unigene0030341	Unigene0020254	Unigene0028839	0.00322632	0.0223526	0.144337	0.0613	0.4246
ORTHOMCL7525	Unigene0016158	Unigene0028828	Unigene0002719	Unigene0036020	Unigene0045289	Unigene0040034	Unigene0041968	Unigene0030177	Unigene0038749	Unigene0025504	Unigene0028566	0.00358421	0.0248316	0.144341	0.0681	0.4716
ORTHOMCL5520	Unigene0002653	Unigene0015200	Unigene0008563	Unigene0035598	Unigene0034084	Unigene0014428	Unigene0034488	Unigene0000963	Unigene0021787	Unigene0027187	Unigene0034208	0.001	0.00692632	0.144377	0.019	0.1318
ORTHOMCL9047	Unigene0040306	Unigene0029241	Unigene0039386	Unigene0032176	Unigene0045659	Unigene0006685	Unigene0038021	Unigene0025569	Unigene0027312	Unigene0034004	Unigene0004833	0.000621053	0.0043	0.144431	0.0118	0.0817
ORTHOMCL8776	Unigene0045841	Unigene0028660	Unigene0004448	Unigene0011593	Unigene0017430	Unigene0004311	Unigene0012229	Unigene0026316	Unigene0038794	Unigene0033956	Unigene0037733	0.00138421	0.00957895	0.144505	0.0263	0.1821
ORTHOMCL8476	Unigene0034195	Unigene0030907	Unigene0028801	Unigene0004027	Unigene0021761	Unigene0019395	Unigene0003807	Unigene0030332	Unigene0009402	Unigene0008793	Unigene0011309	0.000873684	0.00604211	0.144599	0.0167	0.1147
ORTHOMCL5605	Unigene0017717	Unigene0033279	Unigene0024473	Unigene0001101	Unigene0028128	Unigene0018637	Unigene0043038	Unigene0006388	Unigene0034289	Unigene0024187	Unigene0034748	0.00420526	0.0290684	0.144668	0.0798	0.5524
ORTHOMCL4504	Unigene0042881	Unigene0000924	Unigene0035301	Unigene0036559	Unigene0000904	Unigene0041047	Unigene0041661	Unigene0031035	Unigene0000053	Unigene0041976	Unigene0037804	0.00162105	0.0111895	0.144873	0.0308	0.2126
ORTHOMCL5428	Unigene0009535	Unigene0020107	Unigene0042462	Unigene0001437	Unigene0010113	Unigene0043895	Unigene0000799	Unigene0040057	Unigene0036226	Unigene0006761	Unigene0026538	0.00157895	0.0108895	0.144998	0.0299	0.2068
ORTHOMCL10512	Unigene0042979	Unigene0036713	Unigene0015503	Unigene0038204	Unigene0012647	Unigene0021705	Unigene0039816	Unigene0015216	Unigene0032550	Unigene0038633	Unigene0015156	0.00397368	0.0273684	0.145192	0.0754	0.52
ORTHOMCL6721	Unigene0040360	Unigene0035048	Unigene0012785	Unigene0038635	Unigene0044263	Unigene0045482	Unigene0046557	Unigene0002004	Unigene0040518	Unigene0046912	Unigene0019041	0.000784211	0.0054	0.145224	0.0151	0.1029
ORTHOMCL5396	Unigene0044721	Unigene0006933	Unigene0040782	Unigene0024540	Unigene0021460	Unigene0026512	Unigene0015979	Unigene0040898	Unigene0033316	Unigene0000760	Unigene0031062	0.00169474	0.0116632	0.145307	0.0324	0.2217
ORTHOMCL4962	Unigene0038388	Unigene0034125	Unigene0035849	Unigene0036460	Unigene0014455	Unigene0011559	Unigene0005577	Unigene0005872	Unigene0000297	Unigene0022414	Unigene0029182	0.00511579	0.0351947	0.145357	0.0971	0.6687
ORTHOMCL5195	Unigene0002625	Unigene0000486	Unigene0024359	Unigene0026835	Unigene0030078	Unigene0014577	Unigene0013789	Unigene0025348	Unigene0033835	Unigene0027640	Unigene0028832	0.00235263	0.0161842	0.145366	0.0447	0.3075
ORTHOMCL5378	Unigene0041173	Unigene0034864	Unigene0036982	Unigene0029425	Unigene0024354	Unigene0034800	Unigene0034319	Unigene0000736	Unigene0034890	Unigene0045989	Unigene0027215	0.00466316	0.0320737	0.145389	0.0887	0.6095
ORTHOMCL5208	Unigene0010734	Unigene0027495	Unigene0038972	Unigene0031930	Unigene0029394	Unigene0000497	Unigene0030596	Unigene0025107	Unigene0003583	Unigene0034905	Unigene0021611	0.0016	0.011	0.145455	0.0305	0.209
ORTHOMCL5236	Unigene0001367	Unigene0003841	Unigene0033414	Unigene0023022	Unigene0025531	Unigene0020349	Unigene0015437	Unigene0000521	Unigene0022297	Unigene0022011	Unigene0018217	0.00342632	0.0235263	0.145638	0.0652	0.4468
ORTHOMCL8883	Unigene0044707	Unigene0027739	Unigene0022030	Unigene0026031	Unigene0023624	Unigene0004514	Unigene0034747	Unigene0042738	Unigene0031087	Unigene0026912	Unigene0032287	0.00125263	0.00858947	0.145833	0.0238	0.1634
ORTHOMCL6027	Unigene0006777	Unigene0014718	Unigene0017186	Unigene0003887	Unigene0038617	Unigene0011829	Unigene0001472	Unigene0006077	Unigene0036388	Unigene0011668	Unigene0008859	0.00247368	0.0169421	0.146008	0.047	0.322
ORTHOMCL8086	Unigene0006565	Unigene0012968	Unigene0005072	Unigene0041015	Unigene0013981	Unigene0017349	Unigene0003324	Unigene0019329	Unigene0020443	Unigene0044644	Unigene0003686	0.00104211	0.00713158	0.146125	0.0197	0.1356
ORTHOMCL6931	Unigene0022434	Unigene0002165	Unigene0035386	Unigene0031777	Unigene0033524	Unigene0026283	Unigene0024065	Unigene0028621	Unigene0037094	Unigene0028577	Unigene0028967	0.000436842	0.00298947	0.146127	0.0084	0.0569
ORTHOMCL5661	Unigene0044666	Unigene0012436	Unigene0025156	Unigene0038717	Unigene0042412	Unigene0001157	Unigene0034198	Unigene0045550	Unigene0034486	Unigene0037600	Unigene0029731	0.000836842	0.00572632	0.14614	0.0158	0.109
ORTHOMCL7402	Unigene0002599	Unigene0039883	Unigene0040421	Unigene0009125	Unigene0043883	Unigene0044728	Unigene0044485	Unigene0003112	Unigene0031874	Unigene0003721	Unigene0003071	0.00136842	0.00936316	0.14615	0.0258	0.1779
ORTHOMCL6147	Unigene0039527	Unigene0041432	Unigene0034001	Unigene0009878	Unigene0029592	Unigene0001551	Unigene0023388	Unigene0019994	Unigene0030426	Unigene0021436	Unigene0005143	0.00468947	0.0320842	0.146161	0.0891	0.6095
ORTHOMCL4856	Unigene0043065	Unigene0000224	Unigene0040780	Unigene0003021	Unigene0029116	Unigene0021697	Unigene0003247	Unigene0000575	Unigene0005241	Unigene0001576	Unigene0034289	0.00164737	0.0112684	0.146193	0.0313	0.2144
ORTHOMCL5837	Unigene0044295	Unigene0020404	Unigene0041950	Unigene0034329	Unigene0046003	Unigene0043428	Unigene0002788	Unigene0009846	Unigene0010399	Unigene0044828	Unigene0001331	0.000705263	0.00481579	0.146448	0.0134	0.0915
ORTHOMCL7725	Unigene0013735	Unigene0002932	Unigene0042525	Unigene0035426	Unigene0004666	Unigene0005401	Unigene0007836	Unigene0028408	Unigene0013799	Unigene0019194	Unigene0005894	0.00100526	0.00685789	0.146585	0.0191	0.1304
ORTHOMCL7297	Unigene0003096	Unigene0038633	Unigene0005497	Unigene0029062	Unigene0045216	Unigene0006485	Unigene0047256	Unigene0002509	Unigene0042292	Unigene0008485	Unigene0005545	0.00137368	0.00936842	0.146629	0.0259	0.178
ORTHOMCL7948	Unigene0037713	Unigene0009715	Unigene0039260	Unigene0031837	Unigene0003154	Unigene0045145	Unigene0045193	Unigene0013248	Unigene0036808	Unigene0045168	Unigene0033449	0.00101053	0.00688947	0.146677	0.019	0.131
ORTHOMCL4855	Unigene0012191	Unigene0023574	Unigene0011248	Unigene0039677	Unigene0043682	Unigene0009492	Unigene0000223	Unigene0020571	Unigene0042169	Unigene0004795	Unigene0039156	0.00121053	0.00825263	0.146684	0.023	0.1568
ORTHOMCL10068	Unigene0041400	Unigene0036860	Unigene0020143	Unigene0011757	Unigene0046414	Unigene0008502	Unigene0027337	Unigene0022767	Unigene0017372	Unigene0010664	Unigene0015019	0.00260526	0.0177579	0.14671	0.0496	0.3375
ORTHOMCL5831	Unigene0026792	Unigene0013351	Unigene0034456	Unigene0002850	Unigene0001325	Unigene0024844	Unigene0023298	Unigene0034237	Unigene0020615	Unigene0048553	Unigene0031777	0.00242105	0.0164895	0.146824	0.046	0.3133
ORTHOMCL10228	Unigene0037515	Unigene0016772	Unigene0040995	Unigene0036480	Unigene0033447	Unigene0033321	Unigene0017627	Unigene0009845	Unigene0037644	Unigene0032683	Unigene0033103	0.000694737	0.00473158	0.14683	0.0133	0.0899
ORTHOMCL6469	Unigene0042344	Unigene0013522	Unigene0013341	Unigene0032619	Unigene0045655	Unigene0015726	Unigene0003109	Unigene0018453	Unigene0007261	Unigene0001795	Unigene0028588	0.00358947	0.0244368	0.146888	0.068	0.4642
ORTHOMCL5676	Unigene0045078	Unigene0008945	Unigene0005494	Unigene0036843	Unigene0039395	Unigene0015811	Unigene0041690	Unigene0002783	Unigene0001176	Unigene0018478	Unigene0002244	0.00144737	0.00985263	0.146902	0.0275	0.1872
ORTHOMCL10186	Unigene0009499	Unigene0035213	Unigene0036935	Unigene0032030	Unigene0045316	Unigene0033006	Unigene0011711	Unigene0010569	Unigene0033937	Unigene0028550	Unigene0032048	0.00368947	0.0250842	0.147084	0.0701	0.4767
ORTHOMCL8457	Unigene0044795	Unigene0021648	Unigene0039235	Unigene0003786	Unigene0037287	Unigene0039988	Unigene0042911	Unigene0045833	Unigene0007920	Unigene0048637	Unigene0030748	0.000936842	0.00636842	0.147107	0.0178	0.1211
ORTHOMCL4860	Unigene0000552	Unigene0024503	Unigene0038116	Unigene0033398	Unigene0000949	Unigene0000227	Unigene0000270	Unigene0001548	Unigene0023428	Unigene0028693	Unigene0031263	0.00269474	0.0182842	0.147381	0.0511	0.3473
ORTHOMCL7464	Unigene0013697	Unigene0040347	Unigene0019855	Unigene0034244	Unigene0021011	Unigene0014555	Unigene0026609	Unigene0041900	Unigene0027705	Unigene0002660	Unigene0028818	0.00583684	0.0396	0.147395	0.1109	0.7525
ORTHOMCL5114	Unigene0032359	Unigene0000422	Unigene0017303	Unigene0017856	Unigene0011206	Unigene0041692	Unigene0003088	Unigene0025041	Unigene0021596	Unigene0020214	Unigene0021779	0.00408947	0.0277053	0.147606	0.0778	0.5264
ORTHOMCL6152	Unigene0037900	Unigene0004510	Unigene0004405	Unigene0036586	Unigene0047501	Unigene0009939	Unigene0002533	Unigene0047289	Unigene0001556	Unigene0011387	Unigene0007513	0.000931579	0.00631053	0.147623	0.0177	0.1198
ORTHOMCL6731	Unigene0023860	Unigene0029239	Unigene0009193	Unigene0002011	Unigene0040462	Unigene0043617	Unigene0044696	Unigene0047294	Unigene0018788	Unigene0031604	Unigene0018340	0.00100526	0.0068	0.147833	0.0191	0.1294
ORTHOMCL4850	Unigene0000358	Unigene0004818	Unigene0020629	Unigene0031238	Unigene0033746	Unigene0000241	Unigene0030086	Unigene0001738	Unigene0007955	Unigene0000317	Unigene0000221	0.00516842	0.0349579	0.147847	0.0979	0.6642
ORTHOMCL7707	Unigene0038978	Unigene0030161	Unigene0014730	Unigene0015121	Unigene0038425	Unigene0027279	Unigene0002907	Unigene0047148	Unigene0024139	Unigene0030650	Unigene0010931	0.00167895	0.0113526	0.147891	0.0319	0.2155
ORTHOMCL9864	Unigene0007475	Unigene0031959	Unigene0031382	Unigene0039611	Unigene0013688	Unigene0038708	Unigene0021820	Unigene0019637	Unigene0030361	Unigene0042713	Unigene0028201	0.000947368	0.00640526	0.147905	0.0179	0.1216
ORTHOMCL9520	Unigene0017031	Unigene0006136	Unigene0028961	Unigene0025099	Unigene0035418	Unigene0033180	Unigene0018518	Unigene0037816	Unigene0029386	Unigene0038139	Unigene0026966	0.000968421	0.00654737	0.14791	0.0185	0.1245
ORTHOMCL6700	Unigene0019355	Unigene0005918	Unigene0001982	Unigene0020133	Unigene0003779	Unigene0003565	Unigene0044908	Unigene0014275	Unigene0031227	Unigene0048164	Unigene0002623	0.00126316	0.00852632	0.148148	0.0242	0.162
ORTHOMCL8269	Unigene0003535	Unigene0006375	Unigene0039440	Unigene0003605	Unigene0045764	Unigene0019554	Unigene0011460	Unigene0008062	Unigene0004644	Unigene0047711	Unigene0033549	0.00426316	0.0287526	0.14827	0.0809	0.5464
ORTHOMCL10420	Unigene0030048	Unigene0011674	Unigene0026473	Unigene0028110	Unigene0035614	Unigene0035337	Unigene0040053	Unigene0043361	Unigene0027403	Unigene0040962	Unigene0026364	0.00184737	0.0124526	0.148352	0.0352	0.2366
ORTHOMCL5214	Unigene0042322	Unigene0000505	Unigene0020331	Unigene0033808	Unigene0044709	Unigene0043554	Unigene0001396	Unigene0000615	Unigene0014054	Unigene0001119	Unigene0033940	0.00222105	0.0149632	0.148435	0.0422	0.2843
ORTHOMCL7260	Unigene0038650	Unigene0020344	Unigene0030807	Unigene0002465	Unigene0043811	Unigene0030342	Unigene0041533	Unigene0032426	Unigene0037455	Unigene0024146	Unigene0032675	0.0043	0.0289684	0.148438	0.0816	0.5502
ORTHOMCL7921	Unigene0017952	Unigene0040298	Unigene0009869	Unigene0003125	Unigene0014494	Unigene0044658	Unigene0016515	Unigene0018993	Unigene0003546	Unigene0016880	Unigene0003414	0.000857895	0.00577895	0.148452	0.0163	0.1099
ORTHOMCL7154	Unigene0043858	Unigene0039250	Unigene0036232	Unigene0002368	Unigene0024874	Unigene0023962	Unigene0043310	Unigene0011562	Unigene0006883	Unigene0031722	Unigene0031210	0.00133684	0.009	0.148538	0.0253	0.1709
ORTHOMCL5633	Unigene0006702	Unigene0038573	Unigene0029815	Unigene0012104	Unigene0045752	Unigene0026982	Unigene0047779	Unigene0043911	Unigene0039611	Unigene0045318	Unigene0001132	0.000642105	0.00431579	0.14878	0.0121	0.0821
ORTHOMCL4617	Unigene0000607	Unigene0000253	Unigene0035970	Unigene0000926	Unigene0000466	Unigene0040513	Unigene0041836	Unigene0001255	Unigene0000097	Unigene0024099	Unigene0035040	0.00328947	0.0220842	0.148951	0.0625	0.4198
ORTHOMCL8548	Unigene0042980	Unigene0039636	Unigene0034738	Unigene0031403	Unigene0042568	Unigene0007175	Unigene0042359	Unigene0003922	Unigene0040769	Unigene0044452	Unigene0029891	0.00512105	0.0343789	0.148959	0.0974	0.6534
ORTHOMCL8954	Unigene0029610	Unigene0022556	Unigene0037968	Unigene0035593	Unigene0020752	Unigene0019175	Unigene0025799	Unigene0042725	Unigene0004638	Unigene0047696	Unigene0033811	0.00208947	0.0140211	0.149024	0.0396	0.2663
ORTHOMCL10048	Unigene0038604	Unigene0033390	Unigene0035464	Unigene0022251	Unigene0030706	Unigene0035785	Unigene0028907	Unigene0032412	Unigene0034592	Unigene0008396	Unigene0038017	0.00209474	0.0140421	0.149175	0.0398	0.2669
ORTHOMCL7089	Unigene0004335	Unigene0023445	Unigene0042860	Unigene0002305	Unigene0015716	Unigene0016505	Unigene0012286	Unigene0004321	Unigene0003385	Unigene0047892	Unigene0002418	0.000721053	0.00483158	0.149237	0.0139	0.0918
ORTHOMCL5461	Unigene0033522	Unigene0022435	Unigene0029942	Unigene0000866	Unigene0039278	Unigene0013886	Unigene0014998	Unigene0038208	Unigene0027117	Unigene0022253	Unigene0038394	0.00125789	0.00842632	0.149282	0.024	0.1601
ORTHOMCL6451	Unigene0017792	Unigene0003990	Unigene0041189	Unigene0039884	Unigene0031039	Unigene0035354	Unigene0013440	Unigene0015186	Unigene0032238	Unigene0001783	Unigene0005578	0.00135263	0.00905789	0.149332	0.0256	0.1721
ORTHOMCL5075	Unigene0027880	Unigene0034089	Unigene0037631	Unigene0034401	Unigene0002076	Unigene0043014	Unigene0009320	Unigene0000385	Unigene0017897	Unigene0045534	Unigene0004014	0.00395263	0.0264579	0.149393	0.0751	0.5028
ORTHOMCL7406	Unigene0012392	Unigene0038191	Unigene0034946	Unigene0023690	Unigene0011826	Unigene0014572	Unigene0009399	Unigene0013314	Unigene0002603	Unigene0024442	Unigene0002616	0.000910526	0.00609474	0.149396	0.0173	0.1159
ORTHOMCL10763	Unigene0038219	Unigene0033095	Unigene0035815	Unigene0016743	Unigene0027905	Unigene0020307	Unigene0042872	Unigene0029341	Unigene0030636	Unigene0034464	Unigene0034447	0.00644737	0.0430737	0.149682	0.1224	0.8185
ORTHOMCL8946	Unigene0027841	Unigene0016150	Unigene0018769	Unigene0031275	Unigene0004620	Unigene0043663	Unigene0030525	Unigene0008404	Unigene0034724	Unigene0046177	Unigene0030845	0.00341053	0.0227842	0.149688	0.0648	0.4331
ORTHOMCL4883	Unigene0024527	Unigene0010807	Unigene0000623	Unigene0031569	Unigene0000239	Unigene0044901	Unigene0008437	Unigene0001181	Unigene0033855	Unigene0041883	Unigene0030258	0.00218421	0.0145895	0.149711	0.0415	0.2773
ORTHOMCL7768	Unigene0033976	Unigene0018847	Unigene0034750	Unigene0007443	Unigene0031342	Unigene0002982	Unigene0030233	Unigene0037934	Unigene0029959	Unigene0028870	Unigene0017161	0.00333158	0.0222526	0.149716	0.0632	0.4227
ORTHOMCL4720	Unigene0000662	Unigene0000148	Unigene0006593	Unigene0014414	Unigene0003753	Unigene0000762	Unigene0023032	Unigene0025394	Unigene0006252	Unigene0046143	Unigene0023232	0.00223684	0.0149368	0.149753	0.0427	0.2839
ORTHOMCL9001	Unigene0006863	Unigene0036686	Unigene0013992	Unigene0005234	Unigene0005108	Unigene0030484	Unigene0007594	Unigene0004739	Unigene0033970	Unigene0044288	Unigene0040031	0.00456842	0.0304947	0.14981	0.0867	0.5792
ORTHOMCL8843	Unigene0013684	Unigene0023158	Unigene0035943	Unigene0030574	Unigene0046176	Unigene0038161	Unigene0030325	Unigene0004448	Unigene0027356	Unigene0038534	Unigene0032274	0.000773684	0.00516316	0.149847	0.0146	0.098
ORTHOMCL10299	Unigene0028188	Unigene0030427	Unigene0021093	Unigene0011020	Unigene0019184	Unigene0012946	Unigene0011201	Unigene0031943	Unigene0023650	Unigene0010443	Unigene0020690	0.00111053	0.00741053	0.149858	0.0212	0.1409
ORTHOMCL5788	Unigene0006566	Unigene0025556	Unigene0025773	Unigene0037278	Unigene0032221	Unigene0045123	Unigene0003535	Unigene0002930	Unigene0010724	Unigene0006600	Unigene0001272	0.00178421	0.0119053	0.149867	0.034	0.2263
ORTHOMCL8939	Unigene0037671	Unigene0035522	Unigene0037934	Unigene0031954	Unigene0017296	Unigene0043610	Unigene0042428	Unigene0004611	Unigene0022586	Unigene0046056	Unigene0033856	0.00198421	0.0132368	0.149901	0.0378	0.2516
ORTHOMCL9622	Unigene0032307	Unigene0008418	Unigene0015537	Unigene0023685	Unigene0023779	Unigene0014919	Unigene0023574	Unigene0015954	Unigene0026453	Unigene0013441	Unigene0006437	0.000831579	0.00554737	0.149905	0.0158	0.1055
ORTHOMCL10177	Unigene0028211	Unigene0022598	Unigene0026187	Unigene0022865	Unigene0037304	Unigene0009458	Unigene0031027	Unigene0021228	Unigene0039584	Unigene0021477	Unigene0026789	0.000463158	0.00308947	0.149915	0.0088	0.0588
ORTHOMCL5748	Unigene0002353	Unigene0022473	Unigene0023103	Unigene0030179	Unigene0032987	Unigene0036149	Unigene0010386	Unigene0025020	Unigene0001242	Unigene0042485	Unigene0018395	0.000589474	0.00393158	0.149933	0.0112	0.0747
ORTHOMCL9067	Unigene0039841	Unigene0004882	Unigene0015433	Unigene0026196	Unigene0013060	Unigene0027912	Unigene0039541	Unigene0046018	Unigene0020250	Unigene0049467	Unigene0031266	0.00103158	0.00687895	0.149962	0.0195	0.1308
ORTHOMCL10828	Unigene0038813	Unigene0029464	Unigene0018486	Unigene0032075	Unigene0034950	Unigene0041245	Unigene0043388	Unigene0020020	Unigene0037200	Unigene0041616	Unigene0032955	0.00117895	0.00785789	0.150033	0.0224	0.1494
ORTHOMCL9407	Unigene0034194	Unigene0030083	Unigene0028798	Unigene0029087	Unigene0014873	Unigene0015721	Unigene0034607	Unigene0036934	Unigene0030155	Unigene0005735	Unigene0007955	0.000736842	0.00491053	0.150054	0.0142	0.0931
ORTHOMCL5557	Unigene0015373	Unigene0033644	Unigene0016111	Unigene0018819	Unigene0027821	Unigene0026352	Unigene0012128	Unigene0043261	Unigene0001034	Unigene0020546	Unigene0029194	0.00534211	0.0355737	0.15017	0.1015	0.6759
ORTHOMCL4459	Unigene0007210	Unigene0021240	Unigene0001035	Unigene0000845	Unigene0028728	Unigene0028161	Unigene0032686	Unigene0042762	Unigene0002777	Unigene0000039	Unigene0000416	0.00402632	0.0268105	0.150177	0.0764	0.5094
ORTHOMCL5771	Unigene0042468	Unigene0011016	Unigene0001259	Unigene0013507	Unigene0033912	Unigene0032115	Unigene0026457	Unigene0009388	Unigene0004669	Unigene0010775	Unigene0024713	0.00248421	0.0165368	0.150223	0.0471	0.3141
ORTHOMCL8173	Unigene0039634	Unigene0034588	Unigene0003417	Unigene0039870	Unigene0024349	Unigene0022892	Unigene0026222	Unigene0023270	Unigene0030755	Unigene0044160	Unigene0039670	0.00214737	0.0142895	0.150276	0.0407	0.2715
ORTHOMCL4761	Unigene0000516	Unigene0029333	Unigene0000776	Unigene0039734	Unigene0000258	Unigene0000167	Unigene0000182	Unigene0000796	Unigene0001041	Unigene0001109	Unigene0000317	0.00337895	0.0224789	0.150316	0.0641	0.4272
ORTHOMCL7453	Unigene0043452	Unigene0003637	Unigene0032220	Unigene0030127	Unigene0047800	Unigene0002650	Unigene0003882	Unigene0015192	Unigene0038737	Unigene0035025	Unigene0016061	0.001	0.00665263	0.150316	0.019	0.1265
ORTHOMCL8891	Unigene0004530	Unigene0008916	Unigene0022604	Unigene0032116	Unigene0005427	Unigene0005597	Unigene0044025	Unigene0006051	Unigene0019518	Unigene0023571	Unigene0014913	0.00365789	0.0243316	0.150335	0.0693	0.4625
ORTHOMCL8283	Unigene0018288	Unigene0037800	Unigene0040301	Unigene0036041	Unigene0003546	Unigene0045710	Unigene0043610	Unigene0032002	Unigene0022868	Unigene0030275	Unigene0019332	0.00390526	0.0259316	0.150599	0.0744	0.4927
ORTHOMCL9611	Unigene0037787	Unigene0021839	Unigene0006410	Unigene0023659	Unigene0042986	Unigene0035156	Unigene0035020	Unigene0023199	Unigene0027065	Unigene0026132	Unigene0021643	0.00644211	0.0427368	0.150739	0.1224	0.8118
ORTHOMCL5496	Unigene0001349	Unigene0001129	Unigene0037122	Unigene0000922	Unigene0041255	Unigene0025685	Unigene0046912	Unigene0005266	Unigene0038948	Unigene0008455	Unigene0036956	0.00236316	0.0156684	0.150823	0.0448	0.2977
ORTHOMCL7186	Unigene0039708	Unigene0037429	Unigene0040932	Unigene0003860	Unigene0040573	Unigene0005533	Unigene0046046	Unigene0042868	Unigene0035534	Unigene0011623	Unigene0002395	0.00119474	0.00792105	0.150831	0.0227	0.1506
ORTHOMCL6855	Unigene0039113	Unigene0041256	Unigene0038779	Unigene0011183	Unigene0026300	Unigene0002446	Unigene0005052	Unigene0042345	Unigene0034729	Unigene0012997	Unigene0002099	0.00246842	0.0163526	0.150949	0.047	0.3108
ORTHOMCL6738	Unigene0010403	Unigene0037710	Unigene0040119	Unigene0002016	Unigene0005767	Unigene0002922	Unigene0020836	Unigene0028279	Unigene0042733	Unigene0020256	Unigene0035635	0.000810526	0.00536842	0.15098	0.0154	0.1022
ORTHOMCL5067	Unigene0012737	Unigene0000720	Unigene0008411	Unigene0038818	Unigene0000374	Unigene0004802	Unigene0047273	Unigene0012540	Unigene0000569	Unigene0005246	Unigene0006105	0.00175789	0.0116316	0.151131	0.0336	0.2211
ORTHOMCL8332	Unigene0006730	Unigene0034203	Unigene0038492	Unigene0016173	Unigene0043932	Unigene0003611	Unigene0017045	Unigene0046196	Unigene0022223	Unigene0013496	Unigene0005633	0.000878947	0.00581579	0.151131	0.0167	0.1106
ORTHOMCL8663	Unigene0005919	Unigene0015006	Unigene0019911	Unigene0017463	Unigene0046075	Unigene0008484	Unigene0004093	Unigene0044467	Unigene0010656	Unigene0024540	Unigene0016048	0.00138947	0.00918947	0.151203	0.0265	0.1745
ORTHOMCL4707	Unigene0031373	Unigene0011419	Unigene0000540	Unigene0026857	Unigene0028187	Unigene0000213	Unigene0021018	Unigene0000554	Unigene0000140	Unigene0000437	Unigene0038473	0.00171053	0.0113105	0.151233	0.0325	0.2149
ORTHOMCL9501	Unigene0024377	Unigene0015669	Unigene0040329	Unigene0033530	Unigene0038843	Unigene0032478	Unigene0029604	Unigene0011530	Unigene0006056	Unigene0049058	Unigene0032431	0.00277895	0.0183684	0.151289	0.0528	0.3493
ORTHOMCL9881	Unigene0027395	Unigene0012755	Unigene0013543	Unigene0024526	Unigene0026636	Unigene0023381	Unigene0026441	Unigene0007563	Unigene0011279	Unigene0029958	Unigene0034349	0.0012	0.00793158	0.151294	0.0228	0.1506
ORTHOMCL7050	Unigene0003003	Unigene0011570	Unigene0032331	Unigene0040636	Unigene0021137	Unigene0044540	Unigene0015080	Unigene0032743	Unigene0008245	Unigene0002265	Unigene0033814	0.00111579	0.00737368	0.15132	0.0212	0.1401
ORTHOMCL6727	Unigene0038745	Unigene0029388	Unigene0006535	Unigene0009234	Unigene0042163	Unigene0039113	Unigene0038911	Unigene0036311	Unigene0013736	Unigene0039605	Unigene0002006	0.00100526	0.00664211	0.151347	0.0192	0.1262
ORTHOMCL7845	Unigene0003044	Unigene0032601	Unigene0039933	Unigene0027010	Unigene0043050	Unigene0011173	Unigene0011322	Unigene0011863	Unigene0014956	Unigene0010769	Unigene0008287	0.00243684	0.0160947	0.151406	0.0461	0.3057
ORTHOMCL5226	Unigene0007021	Unigene0000512	Unigene0010049	Unigene0017504	Unigene0001433	Unigene0010569	Unigene0039932	Unigene0035465	Unigene0042694	Unigene0013431	Unigene0004133	0.00118421	0.00782105	0.151413	0.0225	0.1486
ORTHOMCL7519	Unigene0040775	Unigene0014426	Unigene0042923	Unigene0036834	Unigene0014227	Unigene0016390	Unigene0002716	Unigene0033096	Unigene0031945	Unigene0031023	Unigene0026181	0.00185789	0.0122684	0.151437	0.0354	0.2334
ORTHOMCL6282	Unigene0031014	Unigene0018418	Unigene0010543	Unigene0014648	Unigene0028192	Unigene0030248	Unigene0031090	Unigene0008699	Unigene0042113	Unigene0001656	Unigene0020030	0.00226842	0.0149789	0.151441	0.0431	0.2847
ORTHOMCL8262	Unigene0042297	Unigene0035756	Unigene0006914	Unigene0039063	Unigene0042733	Unigene0040976	Unigene0045368	Unigene0003527	Unigene0021618	Unigene0048769	Unigene0034978	0.000784211	0.00517368	0.151577	0.0148	0.0985
ORTHOMCL7337	Unigene0005886	Unigene0014835	Unigene0035568	Unigene0002538	Unigene0045363	Unigene0043192	Unigene0045975	Unigene0004513	Unigene0003340	Unigene0046936	Unigene0033484	0.00103158	0.00680526	0.151585	0.0196	0.1294
ORTHOMCL4872	Unigene0000776	Unigene0017493	Unigene0019728	Unigene0033436	Unigene0020906	Unigene0000233	Unigene0001012	Unigene0018955	Unigene0018770	Unigene0047956	Unigene0010631	0.00655789	0.0432316	0.151692	0.1245	0.8216
ORTHOMCL8284	Unigene0037681	Unigene0013507	Unigene0036088	Unigene0011239	Unigene0043143	Unigene0044072	Unigene0045622	Unigene0003547	Unigene0035289	Unigene0005459	Unigene0020753	0.00196316	0.0129368	0.151749	0.0371	0.2459
ORTHOMCL5693	Unigene0001187	Unigene0036597	Unigene0043523	Unigene0039445	Unigene0044744	Unigene0044420	Unigene0046070	Unigene0043399	Unigene0033358	Unigene0044166	Unigene0036847	0.00430526	0.0283632	0.151791	0.0818	0.539
ORTHOMCL6461	Unigene0025112	Unigene0025765	Unigene0038466	Unigene0037463	Unigene0026231	Unigene0028102	Unigene0045911	Unigene0001790	Unigene0039309	Unigene0011475	Unigene0032105	0.00116842	0.00769474	0.151847	0.0224	0.1462
ORTHOMCL10269	Unigene0014621	Unigene0015764	Unigene0040623	Unigene0038146	Unigene0010192	Unigene0026523	Unigene0042726	Unigene0040330	Unigene0038615	Unigene0031504	Unigene0040080	0.00413684	0.0272421	0.151855	0.0786	0.5176
ORTHOMCL10738	Unigene0016187	Unigene0026253	Unigene0031244	Unigene0031364	Unigene0021311	Unigene0026987	Unigene0030156	Unigene0047236	Unigene0041377	Unigene0027185	Unigene0016373	0.00329474	0.0216895	0.151905	0.0626	0.4122
ORTHOMCL7600	Unigene0014658	Unigene0017722	Unigene0002779	Unigene0032205	Unigene0031063	Unigene0026637	Unigene0034080	Unigene0041369	Unigene0032988	Unigene0022965	Unigene0034050	0.00320526	0.0210842	0.152022	0.061	0.4006
ORTHOMCL10817	Unigene0038693	Unigene0037414	Unigene0018201	Unigene0035011	Unigene0047284	Unigene0031813	Unigene0026966	Unigene0033472	Unigene0037334	Unigene0041903	Unigene0032369	0.00108947	0.00716316	0.152094	0.0207	0.1361
ORTHOMCL10521	Unigene0034597	Unigene0022362	Unigene0029332	Unigene0012735	Unigene0016884	Unigene0018899	Unigene0037397	Unigene0020513	Unigene0020314	Unigene0037503	Unigene0013838	0.000931579	0.00612105	0.152193	0.0178	0.1163
ORTHOMCL10704	Unigene0036696	Unigene0040006	Unigene0022537	Unigene0032555	Unigene0045812	Unigene0016208	Unigene0042736	Unigene0015674	Unigene0032350	Unigene0044681	Unigene0039109	0.00312105	0.0205	0.152246	0.0591	0.3897
ORTHOMCL9341	Unigene0037778	Unigene0024600	Unigene0034230	Unigene0037998	Unigene0042296	Unigene0044358	Unigene0048051	Unigene0005558	Unigene0040757	Unigene0027066	Unigene0034817	0.0012	0.00787895	0.152305	0.0228	0.1497
ORTHOMCL10993	Unigene0032685	Unigene0036076	Unigene0031129	Unigene0040108	Unigene0044011	Unigene0032265	Unigene0041837	Unigene0044911	Unigene0041630	Unigene0045294	Unigene0035412	0.00144211	0.00946842	0.152307	0.0274	0.18
ORTHOMCL6840	Unigene0010532	Unigene0038406	Unigene0022679	Unigene0010212	Unigene0018574	Unigene0002090	Unigene0013709	Unigene0023276	Unigene0021806	Unigene0049046	Unigene0005025	0.00116316	0.00763684	0.152309	0.0221	0.1451
ORTHOMCL10315	Unigene0033034	Unigene0020405	Unigene0010607	Unigene0032444	Unigene0014256	Unigene0042482	Unigene0030107	Unigene0033588	Unigene0025731	Unigene0040155	Unigene0036037	0.00399474	0.0261842	0.152563	0.0759	0.4974
ORTHOMCL9929	Unigene0039597	Unigene0008614	Unigene0026885	Unigene0032426	Unigene0039550	Unigene0037797	Unigene0038332	Unigene0022256	Unigene0007760	Unigene0048541	Unigene0027374	0.0015	0.00983158	0.15257	0.0284	0.1868
ORTHOMCL6878	Unigene0002117	Unigene0036963	Unigene0004026	Unigene0037940	Unigene0019502	Unigene0031321	Unigene0029822	Unigene0031876	Unigene0032365	Unigene0034650	Unigene0009721	0.00286842	0.0188	0.152576	0.0543	0.3571
ORTHOMCL8245	Unigene0007349	Unigene0021984	Unigene0031310	Unigene0011028	Unigene0008791	Unigene0015636	Unigene0003511	Unigene0007049	Unigene0008534	Unigene0026774	Unigene0027022	0.00114737	0.00751579	0.152661	0.0217	0.1428
ORTHOMCL10494	Unigene0030620	Unigene0027746	Unigene0012360	Unigene0037210	Unigene0039647	Unigene0023224	Unigene0013705	Unigene0028253	Unigene0014485	Unigene0038280	Unigene0027165	0.00142632	0.00934211	0.152676	0.0272	0.1776
ORTHOMCL10174	Unigene0009420	Unigene0035156	Unigene0017433	Unigene0031928	Unigene0042248	Unigene0046282	Unigene0044872	Unigene0046945	Unigene0036456	Unigene0045762	Unigene0032614	0.00914737	0.0599053	0.152697	0.1739	1.1383
ORTHOMCL10940	Unigene0035294	Unigene0028190	Unigene0030550	Unigene0027621	Unigene0038861	Unigene0033609	Unigene0038490	Unigene0045131	Unigene0023358	Unigene0035785	Unigene0028333	0.00105789	0.00692632	0.152736	0.0202	0.1316
ORTHOMCL10478	Unigene0029545	Unigene0033269	Unigene0042562	Unigene0037051	Unigene0025786	Unigene0040107	Unigene0044845	Unigene0041432	Unigene0013309	Unigene0048102	Unigene0012215	0.000789474	0.00516842	0.152749	0.015	0.0981
ORTHOMCL4688	Unigene0002092	Unigene0014527	Unigene0000545	Unigene0019746	Unigene0006441	Unigene0000920	Unigene0022451	Unigene0009008	Unigene0020509	Unigene0000128	Unigene0034360	0.00504211	0.0330053	0.152767	0.0959	0.6272
ORTHOMCL7367	Unigene0007830	Unigene0020611	Unigene0027723	Unigene0011076	Unigene0018120	Unigene0011112	Unigene0045634	Unigene0017740	Unigene0030239	Unigene0048843	Unigene0002566	0.000447368	0.00292632	0.152878	0.0085	0.0557
ORTHOMCL6474	Unigene0005856	Unigene0003386	Unigene0023590	Unigene0013576	Unigene0009321	Unigene0005697	Unigene0032038	Unigene0010059	Unigene0013131	Unigene0031991	Unigene0001799	0.00256316	0.0167526	0.153	0.0486	0.3182
ORTHOMCL5070	Unigene0046075	Unigene0020277	Unigene0003822	Unigene0038668	Unigene0013410	Unigene0004504	Unigene0015049	Unigene0000378	Unigene0036937	Unigene0013791	Unigene0030783	0.00346842	0.0226579	0.153078	0.0659	0.4306
ORTHOMCL8901	Unigene0004549	Unigene0018484	Unigene0030226	Unigene0032958	Unigene0042271	Unigene0028667	Unigene0040342	Unigene0004812	Unigene0017317	Unigene0048512	Unigene0016744	0.000742105	0.00484737	0.153094	0.0141	0.0922
ORTHOMCL6430	Unigene0021836	Unigene0013825	Unigene0001769	Unigene0040419	Unigene0004178	Unigene0044489	Unigene0002311	Unigene0047023	Unigene0021735	Unigene0047746	Unigene0028858	0.00188421	0.0122947	0.153253	0.0358	0.2336
ORTHOMCL7335	Unigene0043232	Unigene0038323	Unigene0002537	Unigene0033633	Unigene0044285	Unigene0029656	Unigene0029376	Unigene0040818	Unigene0012181	Unigene0028873	Unigene0021466	0.00434211	0.0283316	0.15326	0.0826	0.5383
ORTHOMCL9868	Unigene0009489	Unigene0041424	Unigene0027295	Unigene0021133	Unigene0040706	Unigene0045202	Unigene0016871	Unigene0007489	Unigene0036995	Unigene0023780	Unigene0035565	0.00148947	0.00968421	0.153804	0.0284	0.1839
ORTHOMCL4378	Unigene0011561	Unigene0018485	Unigene0007723	Unigene0007015	Unigene0001134	Unigene0011796	Unigene0009844	Unigene0001538	Unigene0003332	Unigene0000007	Unigene0003505	0.00158947	0.0103316	0.153846	0.0302	0.1965
ORTHOMCL10917	Unigene0040781	Unigene0028543	Unigene0021894	Unigene0028669	Unigene0027323	Unigene0027304	Unigene0031589	Unigene0025223	Unigene0033667	Unigene0021838	Unigene0025242	0.00271579	0.0176526	0.153846	0.0517	0.3354
ORTHOMCL8782	Unigene0031817	Unigene0026200	Unigene0027328	Unigene0020994	Unigene0010939	Unigene0025536	Unigene0031650	Unigene0004324	Unigene0034212	Unigene0026978	Unigene0011802	0.00321579	0.0209	0.153866	0.0612	0.3972
ORTHOMCL8186	Unigene0034249	Unigene0003434	Unigene0031245	Unigene0025381	Unigene0033902	Unigene0004909	Unigene0010203	Unigene0036242	Unigene0004625	Unigene0038091	Unigene0023398	0.00137368	0.00892632	0.153892	0.0261	0.1696
ORTHOMCL9733	Unigene0016612	Unigene0037446	Unigene0006877	Unigene0035034	Unigene0041263	Unigene0030924	Unigene0019408	Unigene0028255	Unigene0032121	Unigene0030925	Unigene0008023	0.00607895	0.0395	0.153897	0.1154	0.7505
ORTHOMCL9837	Unigene0037770	Unigene0015807	Unigene0035873	Unigene0035776	Unigene0020804	Unigene0024643	Unigene0016762	Unigene0042999	Unigene0042651	Unigene0007325	Unigene0017067	0.00439474	0.0285474	0.153945	0.0836	0.5424
ORTHOMCL6510	Unigene0021318	Unigene0034780	Unigene0010724	Unigene0019894	Unigene0001827	Unigene0035861	Unigene0041541	Unigene0008511	Unigene0029449	Unigene0031795	Unigene0031127	0.00262632	0.0170526	0.154012	0.05	0.324
ORTHOMCL5744	Unigene0044214	Unigene0007178	Unigene0039623	Unigene0033635	Unigene0024741	Unigene0003884	Unigene0048264	Unigene0004970	Unigene0037448	Unigene0001237	Unigene0016614	0.00128947	0.00836842	0.154088	0.0245	0.159
ORTHOMCL6130	Unigene0012158	Unigene0015816	Unigene0041009	Unigene0002484	Unigene0018975	Unigene0011249	Unigene0002377	Unigene0042010	Unigene0004478	Unigene0001541	Unigene0032811	0.00683684	0.0443421	0.154184	0.1297	0.8422
ORTHOMCL4729	Unigene0039503	Unigene0034278	Unigene0002431	Unigene0003699	Unigene0024511	Unigene0026376	Unigene0027992	Unigene0001155	Unigene0000153	Unigene0005609	Unigene0029456	0.00716842	0.0464842	0.154212	0.1361	0.8835
ORTHOMCL10362	Unigene0010968	Unigene0034793	Unigene0043269	Unigene0022385	Unigene0019366	Unigene0020053	Unigene0047693	Unigene0011889	Unigene0028545	Unigene0021571	Unigene0019709	0.00344737	0.0223526	0.154227	0.0655	0.4245
ORTHOMCL5830	Unigene0017563	Unigene0007925	Unigene0013360	Unigene0008923	Unigene0036508	Unigene0023974	Unigene0015532	Unigene0009211	Unigene0001324	Unigene0012673	Unigene0010834	0.000936842	0.00607368	0.154246	0.0179	0.1154
ORTHOMCL9625	Unigene0025738	Unigene0030117	Unigene0024546	Unigene0006462	Unigene0007055	Unigene0012202	Unigene0010198	Unigene0017983	Unigene0007150	Unigene0022237	Unigene0024850	0.00205263	0.0133053	0.154272	0.0391	0.2528
ORTHOMCL10031	Unigene0030107	Unigene0031956	Unigene0026644	Unigene0036050	Unigene0008314	Unigene0029427	Unigene0041797	Unigene0043662	Unigene0028309	Unigene0036778	Unigene0028179	0.00181579	0.0117632	0.154362	0.0346	0.2236
ORTHOMCL7465	Unigene0006537	Unigene0029996	Unigene0028784	Unigene0031854	Unigene0041690	Unigene0046388	Unigene0044564	Unigene0002660	Unigene0035247	Unigene0015707	Unigene0020480	0.00526316	0.0340579	0.154536	0.1	0.6471
ORTHOMCL9517	Unigene0043763	Unigene0038562	Unigene0037768	Unigene0036596	Unigene0044090	Unigene0039811	Unigene0030202	Unigene0006132	Unigene0012926	Unigene0010740	Unigene0037810	0.0011	0.00711053	0.1547	0.021	0.1351
ORTHOMCL8898	Unigene0004545	Unigene0032926	Unigene0037061	Unigene0012511	Unigene0025692	Unigene0046560	Unigene0019000	Unigene0036075	Unigene0009606	Unigene0030833	Unigene0008965	0.00746842	0.0482474	0.154794	0.1419	0.9168
ORTHOMCL8149	Unigene0010112	Unigene0018473	Unigene0015071	Unigene0030403	Unigene0005432	Unigene0034420	Unigene0003392	Unigene0008660	Unigene0021197	Unigene0008348	Unigene0038941	0.000857895	0.00554211	0.154796	0.0163	0.1054
ORTHOMCL9212	Unigene0039253	Unigene0041586	Unigene0005184	Unigene0014620	Unigene0013443	Unigene0024621	Unigene0036996	Unigene0042314	Unigene0016184	Unigene0013297	Unigene0012017	0.00177368	0.0114526	0.154871	0.0336	0.2178
ORTHOMCL9347	Unigene0007637	Unigene0005581	Unigene0034439	Unigene0020039	Unigene0038726	Unigene0013578	Unigene0010702	Unigene0022554	Unigene0020407	Unigene0015674	Unigene0006182	0.00527895	0.0340737	0.154927	0.1005	0.6475
ORTHOMCL10470	Unigene0041581	Unigene0012123	Unigene0043769	Unigene0016659	Unigene0016469	Unigene0034634	Unigene0031128	Unigene0020031	Unigene0032207	Unigene0023831	Unigene0013177	0.00331579	0.0213947	0.154982	0.0631	0.4064
ORTHOMCL10274	Unigene0021524	Unigene0010745	Unigene0035463	Unigene0010234	Unigene0010951	Unigene0017356	Unigene0041976	Unigene0046083	Unigene0035968	Unigene0027696	Unigene0017711	0.00181579	0.0117053	0.155126	0.0346	0.2225
ORTHOMCL4706	Unigene0000574	Unigene0001320	Unigene0000222	Unigene0000863	Unigene0000139	Unigene0000187	Unigene0000719	Unigene0001558	Unigene0000350	Unigene0000634	Unigene0000304	0.00350526	0.0225947	0.155136	0.0664	0.4293
ORTHOMCL9057	Unigene0012197	Unigene0029807	Unigene0041784	Unigene0008925	Unigene0004932	Unigene0010406	Unigene0009631	Unigene0036965	Unigene0037884	Unigene0004852	Unigene0007393	0.000473684	0.00305263	0.155172	0.0091	0.0582
ORTHOMCL7753	Unigene0033146	Unigene0003730	Unigene0035363	Unigene0002967	Unigene0027737	Unigene0005155	Unigene0047467	Unigene0004913	Unigene0035198	Unigene0005200	Unigene0039257	0.00141053	0.00907895	0.155362	0.0267	0.1725
ORTHOMCL4776	Unigene0043628	Unigene0000175	Unigene0011670	Unigene0000348	Unigene0040627	Unigene0046504	Unigene0012914	Unigene0031279	Unigene0034211	Unigene0013159	Unigene0000934	0.00357895	0.0230316	0.155393	0.068	0.4375
ORTHOMCL8330	Unigene0017338	Unigene0003608	Unigene0037979	Unigene0028022	Unigene0004654	Unigene0036082	Unigene0037814	Unigene0010095	Unigene0037050	Unigene0009770	Unigene0030636	0.000694737	0.00446842	0.155477	0.0131	0.0849
ORTHOMCL6196	Unigene0021762	Unigene0035246	Unigene0025003	Unigene0001594	Unigene0045284	Unigene0018434	Unigene0030050	Unigene0006847	Unigene0027360	Unigene0014595	Unigene0012587	0.000742105	0.00476842	0.155629	0.0141	0.0906
ORTHOMCL5674	Unigene0005099	Unigene0035541	Unigene0040147	Unigene0007755	Unigene0043349	Unigene0040905	Unigene0048437	Unigene0002879	Unigene0036879	Unigene0030697	Unigene0001173	0.00413684	0.0265737	0.155674	0.0785	0.5048
ORTHOMCL8561	Unigene0045851	Unigene0040532	Unigene0010026	Unigene0003944	Unigene0010871	Unigene0012817	Unigene0047291	Unigene0042042	Unigene0024583	Unigene0045272	Unigene0038055	0.00329474	0.0211632	0.155683	0.0626	0.402
ORTHOMCL10103	Unigene0008780	Unigene0037328	Unigene0033549	Unigene0034095	Unigene0033076	Unigene0014593	Unigene0041314	Unigene0043860	Unigene0017048	Unigene0031766	Unigene0031693	0.00121053	0.00777368	0.155721	0.0232	0.1477
ORTHOMCL5609	Unigene0044340	Unigene0032835	Unigene0001103	Unigene0037696	Unigene0002181	Unigene0002975	Unigene0042068	Unigene0017102	Unigene0033807	Unigene0028805	Unigene0033976	0.00416842	0.0267632	0.155752	0.0791	0.5088
ORTHOMCL6823	Unigene0031172	Unigene0028006	Unigene0023267	Unigene0026790	Unigene0047732	Unigene0041835	Unigene0030294	Unigene0019530	Unigene0031955	Unigene0002074	Unigene0021279	0.000894737	0.00574211	0.15582	0.017	0.1092
ORTHOMCL5356	Unigene0041385	Unigene0037265	Unigene0002618	Unigene0021399	Unigene0035988	Unigene0041197	Unigene0034236	Unigene0030124	Unigene0000696	Unigene0001831	Unigene0028535	0.00561053	0.0359789	0.155939	0.1065	0.6835
ORTHOMCL8222	Unigene0012224	Unigene0036004	Unigene0040430	Unigene0034463	Unigene0008306	Unigene0005973	Unigene0010436	Unigene0012289	Unigene0032313	Unigene0047228	Unigene0003481	0.00128947	0.00826316	0.156051	0.0245	0.1571
ORTHOMCL10149	Unigene0041800	Unigene0033909	Unigene0040796	Unigene0009140	Unigene0031606	Unigene0010586	Unigene0043083	Unigene0041250	Unigene0039801	Unigene0045635	Unigene0031270	0.00387368	0.0248053	0.156164	0.0736	0.4713
ORTHOMCL8356	Unigene0043442	Unigene0027596	Unigene0003641	Unigene0022182	Unigene0042169	Unigene0026464	Unigene0042089	Unigene0009448	Unigene0008277	Unigene0006476	Unigene0036546	0.00144737	0.00926316	0.15625	0.0273	0.1761
ORTHOMCL9655	Unigene0037174	Unigene0033408	Unigene0036659	Unigene0035747	Unigene0045502	Unigene0043564	Unigene0044554	Unigene0016104	Unigene0006574	Unigene0045416	Unigene0034433	0.00133684	0.00854737	0.156404	0.0253	0.1625
ORTHOMCL9872	Unigene0022514	Unigene0034578	Unigene0024053	Unigene0009843	Unigene0027515	Unigene0041051	Unigene0034002	Unigene0046264	Unigene0033848	Unigene0025106	Unigene0007507	0.00247895	0.0158474	0.156426	0.0472	0.3012
ORTHOMCL7974	Unigene0014099	Unigene0029275	Unigene0042657	Unigene0011928	Unigene0045390	Unigene0011943	Unigene0003187	Unigene0018563	Unigene0017057	Unigene0033425	Unigene0039340	0.00429474	0.0274526	0.156442	0.0815	0.5215
ORTHOMCL8352	Unigene0032747	Unigene0003638	Unigene0028845	Unigene0013874	Unigene0039440	Unigene0034213	Unigene0037900	Unigene0007602	Unigene0020687	Unigene0038015	Unigene0024726	0.000778947	0.00497895	0.156448	0.0148	0.0947
ORTHOMCL4469	Unigene0020840	Unigene0012630	Unigene0013757	Unigene0032422	Unigene0041234	Unigene0046472	Unigene0044892	Unigene0028165	Unigene0000043	Unigene0048402	Unigene0001213	0.00555263	0.0354842	0.156482	0.1055	0.6742
ORTHOMCL10711	Unigene0043390	Unigene0035877	Unigene0042248	Unigene0027416	Unigene0041454	Unigene0043463	Unigene0040144	Unigene0015821	Unigene0040611	Unigene0020505	Unigene0029042	0.00101579	0.00647368	0.156911	0.0194	0.1231
ORTHOMCL4819	Unigene0021476	Unigene0000206	Unigene0006946	Unigene0031939	Unigene0044816	Unigene0014107	Unigene0023514	Unigene0023695	Unigene0022001	Unigene0026207	Unigene0029874	0.00416842	0.0265368	0.157081	0.0792	0.5041
ORTHOMCL10682	Unigene0028582	Unigene0017846	Unigene0015173	Unigene0021833	Unigene0027724	Unigene0026103	Unigene0029807	Unigene0031913	Unigene0017576	Unigene0017590	Unigene0023873	0.000836842	0.00532632	0.157115	0.0161	0.1012
ORTHOMCL9957	Unigene0042973	Unigene0032828	Unigene0035769	Unigene0021716	Unigene0023685	Unigene0021864	Unigene0045092	Unigene0045791	Unigene0033413	Unigene0046812	Unigene0007938	0.00216842	0.0138	0.157132	0.0412	0.262
ORTHOMCL7215	Unigene0010009	Unigene0037795	Unigene0037263	Unigene0031677	Unigene0002419	Unigene0010923	Unigene0041370	Unigene0005708	Unigene0032512	Unigene0026462	Unigene0032864	0.00461579	0.0293421	0.157309	0.0878	0.5575
ORTHOMCL6452	Unigene0026466	Unigene0001784	Unigene0023397	Unigene0016671	Unigene0043525	Unigene0005471	Unigene0044653	Unigene0005451	Unigene0007350	Unigene0005878	Unigene0007994	0.000752632	0.00478421	0.157316	0.0143	0.091
ORTHOMCL6484	Unigene0033645	Unigene0001805	Unigene0029047	Unigene0025198	Unigene0039617	Unigene0004870	Unigene0009992	Unigene0024271	Unigene0008314	Unigene0015067	Unigene0023448	0.000936842	0.00595263	0.157383	0.0177	0.1131
ORTHOMCL10775	Unigene0019199	Unigene0036235	Unigene0018669	Unigene0018088	Unigene0017092	Unigene0029812	Unigene0031898	Unigene0032538	Unigene0041989	Unigene0032149	Unigene0023015	0.0007	0.00444211	0.157583	0.0135	0.0844
ORTHOMCL8235	Unigene0025292	Unigene0036163	Unigene0017970	Unigene0003502	Unigene0024954	Unigene0043860	Unigene0028014	Unigene0043951	Unigene0014416	Unigene0014987	Unigene0016795	0.00142632	0.00904737	0.15765	0.0271	0.1718
ORTHOMCL6833	Unigene0039492	Unigene0035665	Unigene0007957	Unigene0019108	Unigene0011319	Unigene0002080	Unigene0014757	Unigene0047463	Unigene0039684	Unigene0031732	Unigene0013825	0.00252105	0.0159895	0.15767	0.0478	0.304
ORTHOMCL9511	Unigene0039541	Unigene0006099	Unigene0022186	Unigene0019139	Unigene0033021	Unigene0029603	Unigene0022594	Unigene0045539	Unigene0015522	Unigene0045092	Unigene0032515	0.00333684	0.0211632	0.157672	0.0635	0.402
ORTHOMCL7777	Unigene0039875	Unigene0005002	Unigene0024082	Unigene0034797	Unigene0017044	Unigene0027489	Unigene0032421	Unigene0045011	Unigene0002989	Unigene0038590	Unigene0035321	0.00456842	0.0289684	0.157703	0.0866	0.5503
ORTHOMCL4371	Unigene0041599	Unigene0000336	Unigene0036701	Unigene0000005	Unigene0000340	Unigene0000045	Unigene0022390	Unigene0001832	Unigene0037957	Unigene0038612	Unigene0030432	0.00145263	0.00921053	0.157714	0.0275	0.175
ORTHOMCL6608	Unigene0038739	Unigene0013057	Unigene0037702	Unigene0037003	Unigene0047803	Unigene0043034	Unigene0048278	Unigene0001919	Unigene0011239	Unigene0045185	Unigene0037653	0.0033	0.0209053	0.157855	0.063	0.3973
ORTHOMCL5005	Unigene0043378	Unigene0004233	Unigene0027271	Unigene0039559	Unigene0044362	Unigene0010899	Unigene0029090	Unigene0000325	Unigene0012899	Unigene0001369	Unigene0018620	0.00445263	0.0281684	0.158072	0.0847	0.5351
ORTHOMCL7643	Unigene0022851	Unigene0040127	Unigene0042125	Unigene0008887	Unigene0008511	Unigene0045016	Unigene0008584	Unigene0011247	Unigene0039157	Unigene0010239	Unigene0002832	0.000857895	0.00542632	0.158099	0.0165	0.1032
ORTHOMCL10121	Unigene0040967	Unigene0039142	Unigene0037259	Unigene0014008	Unigene0021024	Unigene0028255	Unigene0043135	Unigene0008906	Unigene0037399	Unigene0013370	Unigene0035117	0.00147895	0.00935263	0.158132	0.028	0.1776
ORTHOMCL5922	Unigene0022900	Unigene0001398	Unigene0017568	Unigene0033993	Unigene0029923	Unigene0042212	Unigene0034997	Unigene0042339	Unigene0035591	Unigene0045300	Unigene0031920	0.00128421	0.00811579	0.158236	0.0246	0.1544
ORTHOMCL7392	Unigene0034662	Unigene0002588	Unigene0008251	Unigene0038095	Unigene0044706	Unigene0041326	Unigene0041265	Unigene0014218	Unigene0033300	Unigene0047508	Unigene0030992	0.00438947	0.0277316	0.158284	0.0833	0.5271
ORTHOMCL7820	Unigene0032683	Unigene0004767	Unigene0021912	Unigene0006749	Unigene0007556	Unigene0003030	Unigene0008185	Unigene0015815	Unigene0038581	Unigene0016143	Unigene0005051	0.00512105	0.0323421	0.15834	0.0974	0.6146
ORTHOMCL7526	Unigene0041694	Unigene0033384	Unigene0012348	Unigene0008053	Unigene0027068	Unigene0007734	Unigene0002721	Unigene0018042	Unigene0016846	Unigene0009366	Unigene0029446	0.00578421	0.0365211	0.15838	0.11	0.694
ORTHOMCL5545	Unigene0015734	Unigene0028105	Unigene0021620	Unigene0034848	Unigene0043548	Unigene0012072	Unigene0001011	Unigene0041142	Unigene0005947	Unigene0007851	Unigene0018744	0.00593684	0.0374789	0.158405	0.1128	0.7122
ORTHOMCL6305	Unigene0033352	Unigene0014650	Unigene0007877	Unigene0006411	Unigene0006234	Unigene0040229	Unigene0003332	Unigene0016015	Unigene0001677	Unigene0003177	Unigene0009019	0.000894737	0.00564737	0.158434	0.0169	0.1074
ORTHOMCL6149	Unigene0009275	Unigene0006825	Unigene0001553	Unigene0007831	Unigene0039365	Unigene0038465	Unigene0034585	Unigene0030014	Unigene0030983	Unigene0024506	Unigene0017318	0.001	0.00631053	0.158465	0.0193	0.1199
ORTHOMCL7577	Unigene0038831	Unigene0016811	Unigene0040282	Unigene0033686	Unigene0002761	Unigene0041167	Unigene0042033	Unigene0041616	Unigene0037956	Unigene0046660	Unigene0021855	0.00418421	0.0264	0.158493	0.0796	0.5017
ORTHOMCL4423	Unigene0038605	Unigene0035192	Unigene0000063	Unigene0009634	Unigene0000065	Unigene0000022	Unigene0000218	Unigene0000792	Unigene0037355	Unigene0001165	Unigene0032625	0.00182105	0.0114842	0.15857	0.0346	0.2184
ORTHOMCL6874	Unigene0006656	Unigene0037444	Unigene0039530	Unigene0002114	Unigene0021419	Unigene0026511	Unigene0005531	Unigene0024015	Unigene0040094	Unigene0043903	Unigene0039723	0.00397368	0.0250474	0.158647	0.0756	0.476
ORTHOMCL8897	Unigene0039157	Unigene0040336	Unigene0030336	Unigene0018155	Unigene0024058	Unigene0016802	Unigene0030940	Unigene0004545	Unigene0025894	Unigene0016229	Unigene0018890	0.00307368	0.0193684	0.158696	0.0584	0.3678
ORTHOMCL6289	Unigene0028128	Unigene0020958	Unigene0034475	Unigene0026128	Unigene0047859	Unigene0022042	Unigene0045631	Unigene0001662	Unigene0021152	Unigene0049327	Unigene0023175	0.00354211	0.0222947	0.158876	0.0673	0.4236
ORTHOMCL5592	Unigene0027912	Unigene0033046	Unigene0038412	Unigene0035308	Unigene0043561	Unigene0021405	Unigene0045987	Unigene0044893	Unigene0001092	Unigene0031791	Unigene0034911	0.00156316	0.00983684	0.158909	0.0297	0.1869
ORTHOMCL4416	Unigene0025220	Unigene0033213	Unigene0006674	Unigene0014943	Unigene0042802	Unigene0020907	Unigene0000135	Unigene0044023	Unigene0032425	Unigene0000021	Unigene0038069	0.00275263	0.0173053	0.159063	0.0523	0.3287
ORTHOMCL6638	Unigene0039466	Unigene0037056	Unigene0001939	Unigene0009253	Unigene0016209	Unigene0045592	Unigene0025616	Unigene0042252	Unigene0011914	Unigene0048619	Unigene0028594	0.00275789	0.0173368	0.159077	0.0523	0.3293
ORTHOMCL4427	Unigene0001833	Unigene0006998	Unigene0020060	Unigene0034160	Unigene0043925	Unigene0041168	Unigene0041524	Unigene0000214	Unigene0000024	Unigene0000108	Unigene0003373	0.00165263	0.0103737	0.15931	0.0314	0.1972
ORTHOMCL8845	Unigene0041351	Unigene0035777	Unigene0006620	Unigene0004453	Unigene0045088	Unigene0041624	Unigene0038268	Unigene0007002	Unigene0022509	Unigene0027151	Unigene0035564	0.00135789	0.00851579	0.159456	0.0258	0.1618
ORTHOMCL10588	Unigene0024754	Unigene0036391	Unigene0043787	Unigene0013653	Unigene0022715	Unigene0040377	Unigene0020452	Unigene0036055	Unigene0033095	Unigene0025729	Unigene0015907	0.00261579	0.0163947	0.159551	0.0497	0.3117
ORTHOMCL6412	Unigene0007376	Unigene0027551	Unigene0026413	Unigene0010173	Unigene0004656	Unigene0001757	Unigene0005018	Unigene0046772	Unigene0031069	Unigene0020817	Unigene0008483	0.000826316	0.00517895	0.159553	0.0156	0.0985
ORTHOMCL10147	Unigene0014928	Unigene0017720	Unigene0023809	Unigene0017052	Unigene0042334	Unigene0026798	Unigene0012323	Unigene0009131	Unigene0026208	Unigene0011461	Unigene0030943	0.00152105	0.00953158	0.15958	0.0289	0.1812
ORTHOMCL4898	Unigene0000349	Unigene0012356	Unigene0000601	Unigene0000339	Unigene0013579	Unigene0040459	Unigene0000248	Unigene0001062	Unigene0032746	Unigene0026045	Unigene0030343	0.00436316	0.0273316	0.159638	0.0828	0.5194
ORTHOMCL10667	Unigene0029476	Unigene0023804	Unigene0016726	Unigene0031349	Unigene0022851	Unigene0027212	Unigene0014907	Unigene0033137	Unigene0023699	Unigene0020740	Unigene0037730	0.00528947	0.0331211	0.159701	0.1006	0.6293
ORTHOMCL8671	Unigene0004109	Unigene0036232	Unigene0035446	Unigene0014845	Unigene0047574	Unigene0040221	Unigene0047380	Unigene0004973	Unigene0041283	Unigene0038134	Unigene0034740	0.00511053	0.032	0.159704	0.0971	0.6082
ORTHOMCL9179	Unigene0039172	Unigene0005122	Unigene0032704	Unigene0011617	Unigene0040863	Unigene0027165	Unigene0045948	Unigene0039449	Unigene0020463	Unigene0038480	Unigene0026119	0.000973684	0.00609474	0.159758	0.0184	0.1157
ORTHOMCL5901	Unigene0033813	Unigene0003541	Unigene0028507	Unigene0018951	Unigene0001384	Unigene0024453	Unigene0024761	Unigene0029314	Unigene0027781	Unigene0038692	Unigene0016975	0.001	0.00624737	0.160067	0.0189	0.1187
ORTHOMCL5777	Unigene0040683	Unigene0022572	Unigene0039639	Unigene0001266	Unigene0041114	Unigene0013696	Unigene0018654	Unigene0002063	Unigene0035821	Unigene0018287	Unigene0011940	0.00225789	0.0141	0.160134	0.043	0.2681
ORTHOMCL10349	Unigene0020866	Unigene0030799	Unigene0029913	Unigene0015022	Unigene0045060	Unigene0017018	Unigene0017737	Unigene0014671	Unigene0017522	Unigene0016325	Unigene0010875	0.00167368	0.0104368	0.160363	0.0319	0.1984
ORTHOMCL5655	Unigene0039378	Unigene0029493	Unigene0035799	Unigene0034178	Unigene0046956	Unigene0020964	Unigene0006328	Unigene0033375	Unigene0001149	Unigene0029507	Unigene0019211	0.00307368	0.0191579	0.16044	0.0583	0.364
ORTHOMCL7268	Unigene0027197	Unigene0033475	Unigene0031298	Unigene0013399	Unigene0007903	Unigene0045092	Unigene0002476	Unigene0029443	Unigene0040770	Unigene0045663	Unigene0021933	0.00167895	0.0104632	0.160463	0.032	0.1989
ORTHOMCL6574	Unigene0043239	Unigene0003466	Unigene0035987	Unigene0005703	Unigene0042540	Unigene0006632	Unigene0039970	Unigene0002464	Unigene0001883	Unigene0049414	Unigene0030518	0.00494211	0.0307842	0.16054	0.094	0.5852
ORTHOMCL5047	Unigene0001340	Unigene0000978	Unigene0000667	Unigene0000714	Unigene0000833	Unigene0000940	Unigene0001164	Unigene0001269	Unigene0000692	Unigene0000668	Unigene0000357	0.00236316	0.0147105	0.160644	0.0449	0.2796
ORTHOMCL8717	Unigene0012117	Unigene0028428	Unigene0024207	Unigene0004204	Unigene0014610	Unigene0028586	Unigene0023323	Unigene0018175	Unigene0005825	Unigene0022688	Unigene0019844	0.0026	0.0161842	0.16065	0.0494	0.3073
ORTHOMCL4647	Unigene0000270	Unigene0000695	Unigene0000554	Unigene0000725	Unigene0000468	Unigene0000109	Unigene0001273	Unigene0000243	Unigene0000324	Unigene0000713	Unigene0000882	0.00285789	0.0177895	0.160651	0.0543	0.3381
ORTHOMCL7737	Unigene0003879	Unigene0012682	Unigene0009568	Unigene0016187	Unigene0008863	Unigene0006993	Unigene0003192	Unigene0014946	Unigene0002953	Unigene0003544	Unigene0021147	0.00163684	0.0101842	0.160724	0.0311	0.1934
ORTHOMCL8012	Unigene0025401	Unigene0008612	Unigene0016241	Unigene0003234	Unigene0018353	Unigene0046495	Unigene0031547	Unigene0009245	Unigene0016912	Unigene0044466	Unigene0037260	0.00717368	0.0446263	0.16075	0.1362	0.8478
ORTHOMCL8481	Unigene0008329	Unigene0026277	Unigene0041831	Unigene0006059	Unigene0016413	Unigene0018893	Unigene0027963	Unigene0046809	Unigene0008013	Unigene0003812	Unigene0017729	0.000842105	0.00523684	0.160804	0.016	0.0995
ORTHOMCL6135	Unigene0046154	Unigene0025927	Unigene0024872	Unigene0001545	Unigene0011247	Unigene0019055	Unigene0003559	Unigene0029573	Unigene0037793	Unigene0044706	Unigene0037456	0.00180526	0.0112211	0.160882	0.0343	0.2132
ORTHOMCL9861	Unigene0026957	Unigene0020081	Unigene0032838	Unigene0018862	Unigene0031404	Unigene0047010	Unigene0029205	Unigene0021292	Unigene0019997	Unigene0017898	Unigene0007470	0.000736842	0.00457895	0.16092	0.0139	0.0868
ORTHOMCL5341	Unigene0037040	Unigene0034311	Unigene0038414	Unigene0035394	Unigene0008174	Unigene0036464	Unigene0046305	Unigene0000660	Unigene0009873	Unigene0048398	Unigene0036009	0.00293158	0.0182053	0.161029	0.0558	0.3458
ORTHOMCL6806	Unigene0002317	Unigene0022097	Unigene0026404	Unigene0012233	Unigene0043151	Unigene0019132	Unigene0039991	Unigene0002062	Unigene0042008	Unigene0034990	Unigene0023196	0.000805263	0.005	0.161053	0.0153	0.0951
ORTHOMCL5161	Unigene0014918	Unigene0022878	Unigene0020707	Unigene0031456	Unigene0009008	Unigene0005506	Unigene0000947	Unigene0008233	Unigene0000453	Unigene0035188	Unigene0010389	0.00295789	0.0183526	0.16117	0.0563	0.3486
ORTHOMCL6089	Unigene0041090	Unigene0006637	Unigene0004388	Unigene0036940	Unigene0028641	Unigene0041502	Unigene0036026	Unigene0041655	Unigene0002523	Unigene0003566	Unigene0001514	0.000884211	0.00547895	0.161383	0.0169	0.104
ORTHOMCL8239	Unigene0043492	Unigene0039873	Unigene0038159	Unigene0030556	Unigene0003954	Unigene0009827	Unigene0023849	Unigene0023509	Unigene0004045	Unigene0006615	Unigene0003506	0.00107368	0.00665263	0.161392	0.0204	0.1264
ORTHOMCL5361	Unigene0019097	Unigene0033591	Unigene0006938	Unigene0003156	Unigene0047571	Unigene0011358	Unigene0013833	Unigene0017354	Unigene0000707	Unigene0048054	Unigene0036065	0.00118421	0.00733684	0.161406	0.0227	0.1393
ORTHOMCL4451	Unigene0001218	Unigene0033815	Unigene0001024	Unigene0000036	Unigene0000057	Unigene0000204	Unigene0000275	Unigene0000672	Unigene0040803	Unigene0000111	Unigene0028827	0.00192632	0.0119263	0.161518	0.0366	0.2264
ORTHOMCL7964	Unigene0015133	Unigene0015632	Unigene0041401	Unigene0006332	Unigene0004979	Unigene0027015	Unigene0003172	Unigene0006956	Unigene0021988	Unigene0027285	Unigene0033262	0.00441053	0.0273	0.161558	0.0838	0.5187
ORTHOMCL10945	Unigene0042134	Unigene0023664	Unigene0034434	Unigene0025803	Unigene0026008	Unigene0038071	Unigene0028593	Unigene0027278	Unigene0039897	Unigene0031970	Unigene0028808	0.00249474	0.0154316	0.161664	0.0473	0.2931
ORTHOMCL7139	Unigene0010075	Unigene0002358	Unigene0014272	Unigene0016440	Unigene0031826	Unigene0011316	Unigene0017653	Unigene0018113	Unigene0021171	Unigene0008415	Unigene0024952	0.0009	0.00556316	0.161779	0.0171	0.1057
ORTHOMCL4913	Unigene0035026	Unigene0001702	Unigene0001055	Unigene0000853	Unigene0046234	Unigene0007648	Unigene0044269	Unigene0000531	Unigene0000632	Unigene0029484	Unigene0000257	0.00134737	0.00832632	0.16182	0.0256	0.1582
ORTHOMCL4501	Unigene0004847	Unigene0008127	Unigene0035513	Unigene0037781	Unigene0000196	Unigene0019775	Unigene0021737	Unigene0008165	Unigene0036156	Unigene0045086	Unigene0000052	0.00316842	0.0195684	0.161915	0.0601	0.372
ORTHOMCL4658	Unigene0042861	Unigene0014333	Unigene0010274	Unigene0035761	Unigene0047945	Unigene0024622	Unigene0000116	Unigene0025976	Unigene0038752	Unigene0047030	Unigene0004334	0.00553158	0.0341579	0.161941	0.1052	0.6491
ORTHOMCL7622	Unigene0038228	Unigene0002808	Unigene0036223	Unigene0035846	Unigene0044921	Unigene0045526	Unigene0003498	Unigene0044770	Unigene0036250	Unigene0047196	Unigene0036953	0.00437368	0.0269947	0.16202	0.0831	0.5129
ORTHOMCL7408	Unigene0037814	Unigene0008100	Unigene0039661	Unigene0032506	Unigene0041032	Unigene0007979	Unigene0041468	Unigene0002604	Unigene0036973	Unigene0017905	Unigene0029615	0.0015	0.00925789	0.162024	0.0284	0.1759
ORTHOMCL6347	Unigene0031805	Unigene0004641	Unigene0011978	Unigene0018476	Unigene0020478	Unigene0046260	Unigene0019825	Unigene0047339	Unigene0001708	Unigene0025261	Unigene0031039	0.00234211	0.0144316	0.16229	0.0443	0.2742
ORTHOMCL9148	Unigene0014268	Unigene0033603	Unigene0008834	Unigene0017383	Unigene0046844	Unigene0046964	Unigene0046829	Unigene0039594	Unigene0039764	Unigene0012694	Unigene0005046	0.00176316	0.0108632	0.162306	0.0337	0.2064
ORTHOMCL7570	Unigene0038247	Unigene0003668	Unigene0039488	Unigene0007543	Unigene0002755	Unigene0035083	Unigene0041962	Unigene0016278	Unigene0009477	Unigene0010097	Unigene0025017	0.00542105	0.0333842	0.162384	0.1031	0.6343
ORTHOMCL4863	Unigene0038789	Unigene0001733	Unigene0002178	Unigene0033291	Unigene0046257	Unigene0002825	Unigene0001183	Unigene0021472	Unigene0000229	Unigene0002914	Unigene0003905	0.00686316	0.0421947	0.162654	0.1305	0.8016
ORTHOMCL5038	Unigene0027889	Unigene0006690	Unigene0022985	Unigene0022090	Unigene0016602	Unigene0007889	Unigene0045293	Unigene0000352	Unigene0035406	Unigene0025868	Unigene0019631	0.00334737	0.0205737	0.162701	0.0637	0.391
ORTHOMCL5025	Unigene0037860	Unigene0016388	Unigene0039120	Unigene0015463	Unigene0029320	Unigene0046790	Unigene0006927	Unigene0000342	Unigene0032719	Unigene0014888	Unigene0017493	0.00351579	0.0216	0.162768	0.0668	0.4105
ORTHOMCL5081	Unigene0001097	Unigene0022104	Unigene0036456	Unigene0000393	Unigene0010651	Unigene0025921	Unigene0047930	Unigene0036830	Unigene0039868	Unigene0040457	Unigene0009236	0.00526842	0.0323632	0.162791	0.1002	0.6151
ORTHOMCL9477	Unigene0005963	Unigene0027684	Unigene0040143	Unigene0021265	Unigene0035433	Unigene0008465	Unigene0024896	Unigene0028598	Unigene0010687	Unigene0019216	Unigene0037869	0.000673684	0.00413684	0.16285	0.0128	0.0786
ORTHOMCL8101	Unigene0017594	Unigene0039157	Unigene0033455	Unigene0036878	Unigene0033977	Unigene0003336	Unigene0022473	Unigene0004650	Unigene0038455	Unigene0006907	Unigene0024418	0.00187368	0.0115053	0.162855	0.0356	0.2186
ORTHOMCL5955	Unigene0045732	Unigene0005557	Unigene0010076	Unigene0001417	Unigene0006233	Unigene0045556	Unigene0006429	Unigene0047417	Unigene0025777	Unigene0041840	Unigene0023556	0.00476842	0.0292737	0.162891	0.0905	0.5561
ORTHOMCL8825	Unigene0039835	Unigene0023405	Unigene0038092	Unigene0004418	Unigene0018760	Unigene0022912	Unigene0042978	Unigene0021759	Unigene0041522	Unigene0013113	Unigene0011870	0.000921053	0.00565263	0.162942	0.0175	0.1075
ORTHOMCL9052	Unigene0026601	Unigene0023866	Unigene0020389	Unigene0041062	Unigene0008523	Unigene0015029	Unigene0013524	Unigene0025333	Unigene0007616	Unigene0016446	Unigene0004845	0.00246316	0.0151158	0.162953	0.0466	0.2871
ORTHOMCL6807	Unigene0002062	Unigene0042115	Unigene0038675	Unigene0013882	Unigene0004803	Unigene0040111	Unigene0038590	Unigene0010484	Unigene0039467	Unigene0007091	Unigene0002916	0.101442	0.622084	0.163068	1.9274	11.8196
ORTHOMCL5194	Unigene0018076	Unigene0033356	Unigene0005198	Unigene0034558	Unigene0000485	Unigene0011072	Unigene0001445	Unigene0003331	Unigene0015934	Unigene0048057	Unigene0036050	0.00417368	0.0255895	0.163102	0.0792	0.4862
ORTHOMCL7259	Unigene0034968	Unigene0002462	Unigene0032397	Unigene0030318	Unigene0036486	Unigene0036283	Unigene0039194	Unigene0031411	Unigene0031201	Unigene0039602	Unigene0012551	0.00145263	0.00890526	0.163121	0.0276	0.1692
ORTHOMCL4873	Unigene0000288	Unigene0000234	Unigene0000515	Unigene0000789	Unigene0001262	Unigene0000629	Unigene0000915	Unigene0000803	Unigene0001064	Unigene0000274	Unigene0000484	0.00350526	0.0214737	0.163235	0.0665	0.4081
ORTHOMCL10063	Unigene0042031	Unigene0039908	Unigene0008474	Unigene0036807	Unigene0043718	Unigene0042841	Unigene0042287	Unigene0010878	Unigene0038599	Unigene0036808	Unigene0032712	0.174589	1.06881	0.16335	3.3171	20.3073
ORTHOMCL8983	Unigene0004713	Unigene0019241	Unigene0040468	Unigene0038565	Unigene0005063	Unigene0045428	Unigene0044619	Unigene0043195	Unigene0009836	Unigene0011275	Unigene0037842	0.000742105	0.00454211	0.163384	0.0142	0.0863
ORTHOMCL4906	Unigene0002220	Unigene0038969	Unigene0000373	Unigene0000320	Unigene0000252	Unigene0000872	Unigene0000259	Unigene0001528	Unigene0039717	Unigene0000630	Unigene0007262	0.00454211	0.0277895	0.163447	0.0863	0.528
ORTHOMCL4487	Unigene0000326	Unigene0020248	Unigene0000047	Unigene0000876	Unigene0000068	Unigene0035974	Unigene0046404	Unigene0000556	Unigene0022988	Unigene0009616	Unigene0012103	0.00329474	0.0201526	0.163489	0.0625	0.3829
ORTHOMCL10378	Unigene0027545	Unigene0021468	Unigene0019182	Unigene0011193	Unigene0047566	Unigene0023473	Unigene0046353	Unigene0035382	Unigene0033324	Unigene0018596	Unigene0019676	0.000936842	0.00572632	0.163603	0.0179	0.1088
ORTHOMCL5274	Unigene0000557	Unigene0007580	Unigene0040674	Unigene0012717	Unigene0043483	Unigene0041919	Unigene0042784	Unigene0043490	Unigene0034976	Unigene0049281	Unigene0034197	0.00299474	0.0183	0.163647	0.0569	0.3477
ORTHOMCL4969	Unigene0007486	Unigene0008678	Unigene0002388	Unigene0000301	Unigene0014964	Unigene0011051	Unigene0027013	Unigene0018436	Unigene0001798	Unigene0013464	Unigene0004623	0.00395263	0.0241421	0.163724	0.0752	0.4588
ORTHOMCL5708	Unigene0039016	Unigene0041658	Unigene0002148	Unigene0039041	Unigene0044488	Unigene0001621	Unigene0023780	Unigene0022407	Unigene0032720	Unigene0001200	Unigene0021901	0.000957895	0.00584737	0.163816	0.0182	0.1111
ORTHOMCL10502	Unigene0012482	Unigene0041813	Unigene0016013	Unigene0024781	Unigene0047237	Unigene0043336	Unigene0047039	Unigene0043715	Unigene0042419	Unigene0027100	Unigene0032484	0.00284211	0.0173474	0.163835	0.0541	0.3296
ORTHOMCL4432	Unigene0000025	Unigene0000085	Unigene0026786	Unigene0004341	Unigene0000377	Unigene0000224	Unigene0000922	Unigene0000236	Unigene0040845	Unigene0008947	Unigene0035421	0.00633158	0.0386211	0.163941	0.1203	0.7337
ORTHOMCL8223	Unigene0016051	Unigene0022212	Unigene0024857	Unigene0040823	Unigene0003482	Unigene0018997	Unigene0011051	Unigene0008051	Unigene0036219	Unigene0004836	Unigene0014901	0.000752632	0.00458947	0.163991	0.0142	0.0874
ORTHOMCL9635	Unigene0032720	Unigene0039959	Unigene0013359	Unigene0006497	Unigene0026812	Unigene0030487	Unigene0025059	Unigene0046163	Unigene0019220	Unigene0015727	Unigene0008188	0.00126316	0.00769474	0.164159	0.0242	0.146
ORTHOMCL7761	Unigene0029560	Unigene0002975	Unigene0007856	Unigene0009004	Unigene0045427	Unigene0043334	Unigene0045253	Unigene0017963	Unigene0007333	Unigene0009510	Unigene0035840	0.00162632	0.00990526	0.164187	0.0309	0.1882
ORTHOMCL10644	Unigene0039188	Unigene0027174	Unigene0018223	Unigene0038002	Unigene0027125	Unigene0045267	Unigene0022904	Unigene0044854	Unigene0014612	Unigene0049427	Unigene0034625	0.00178947	0.0108842	0.16441	0.034	0.2068
ORTHOMCL10040	Unigene0008363	Unigene0034515	Unigene0023971	Unigene0024897	Unigene0026696	Unigene0025903	Unigene0021723	Unigene0022002	Unigene0033745	Unigene0028956	Unigene0028932	0.00156316	0.00950526	0.164452	0.0298	0.1807
ORTHOMCL8531	Unigene0028294	Unigene0019442	Unigene0003951	Unigene0005391	Unigene0026090	Unigene0005873	Unigene0021861	Unigene0012751	Unigene0003894	Unigene0023709	Unigene0014286	0.00528947	0.0321526	0.164511	0.1004	0.6111
ORTHOMCL7333	Unigene0045184	Unigene0039474	Unigene0009795	Unigene0002535	Unigene0033464	Unigene0026052	Unigene0025366	Unigene0034065	Unigene0032710	Unigene0016423	Unigene0031804	0.0197263	0.119868	0.164566	0.3749	2.2774
ORTHOMCL6604	Unigene0040743	Unigene0003959	Unigene0026738	Unigene0021243	Unigene0046987	Unigene0033993	Unigene0001917	Unigene0043518	Unigene0035149	Unigene0018375	Unigene0035904	0.00304211	0.0184789	0.164625	0.0577	0.3512
ORTHOMCL7859	Unigene0003059	Unigene0004269	Unigene0038741	Unigene0006711	Unigene0046288	Unigene0031425	Unigene0032786	Unigene0039547	Unigene0025927	Unigene0039520	Unigene0012645	0.00174211	0.0105789	0.164677	0.033	0.2009
ORTHOMCL6008	Unigene0009421	Unigene0005999	Unigene0039642	Unigene0001457	Unigene0001751	Unigene0045011	Unigene0004815	Unigene0044261	Unigene0037836	Unigene0006380	Unigene0011733	0.00157895	0.00958421	0.164745	0.0302	0.1822
ORTHOMCL4756	Unigene0028361	Unigene0000164	Unigene0031963	Unigene0034438	Unigene0000181	Unigene0027858	Unigene0025150	Unigene0004916	Unigene0015402	Unigene0004120	Unigene0039288	0.00483158	0.0293211	0.164782	0.0919	0.5571
ORTHOMCL10765	Unigene0029414	Unigene0016759	Unigene0019411	Unigene0021455	Unigene0026391	Unigene0022188	Unigene0034127	Unigene0034417	Unigene0027031	Unigene0021766	Unigene0028570	0.00238947	0.0145	0.164791	0.0455	0.2755
ORTHOMCL7799	Unigene0041864	Unigene0035180	Unigene0041454	Unigene0007525	Unigene0036412	Unigene0039415	Unigene0003015	Unigene0004224	Unigene0016086	Unigene0031227	Unigene0016474	0.00521053	0.0316158	0.164808	0.0988	0.6009
ORTHOMCL9269	Unigene0020032	Unigene0037194	Unigene0023807	Unigene0034636	Unigene0032204	Unigene0010490	Unigene0013888	Unigene0028726	Unigene0023970	Unigene0026346	Unigene0005337	0.0007	0.00424737	0.164808	0.0135	0.0806
ORTHOMCL9955	Unigene0038363	Unigene0042026	Unigene0008665	Unigene0035116	Unigene0020966	Unigene0025194	Unigene0036416	Unigene0040255	Unigene0036692	Unigene0007932	Unigene0035969	0.00458947	0.0278421	0.164839	0.0874	0.5292
ORTHOMCL4381	Unigene0042446	Unigene0036137	Unigene0009541	Unigene0019459	Unigene0000007	Unigene0005882	Unigene0044440	Unigene0042031	Unigene0032319	Unigene0000776	Unigene0035311	0.0063	0.0381895	0.164967	0.1196	0.7256
ORTHOMCL5625	Unigene0006134	Unigene0016875	Unigene0003355	Unigene0039942	Unigene0032438	Unigene0027768	Unigene0026310	Unigene0007399	Unigene0011277	Unigene0001127	Unigene0007065	0.00387895	0.0235	0.165062	0.0738	0.4464
ORTHOMCL5125	Unigene0044812	Unigene0011066	Unigene0034448	Unigene0013338	Unigene0010373	Unigene0042995	Unigene0004853	Unigene0000431	Unigene0032722	Unigene0008779	Unigene0007032	0.00896316	0.0542684	0.165163	0.1703	1.0312
ORTHOMCL10373	Unigene0035263	Unigene0021844	Unigene0017478	Unigene0023748	Unigene0019106	Unigene0024933	Unigene0019993	Unigene0047052	Unigene0036603	Unigene0024515	Unigene0011072	0.00195263	0.0118211	0.165183	0.037	0.2246
ORTHOMCL8626	Unigene0045225	Unigene0025888	Unigene0043758	Unigene0004037	Unigene0029059	Unigene0012573	Unigene0008472	Unigene0004588	Unigene0036430	Unigene0016486	Unigene0020868	0.00288421	0.0174474	0.165309	0.0549	0.3315
ORTHOMCL10230	Unigene0042285	Unigene0027823	Unigene0032705	Unigene0009855	Unigene0011470	Unigene0016995	Unigene0014984	Unigene0025582	Unigene0034521	Unigene0046244	Unigene0028250	0.00107368	0.00649474	0.165316	0.0202	0.1234
ORTHOMCL9056	Unigene0025870	Unigene0010874	Unigene0004849	Unigene0020510	Unigene0029496	Unigene0026255	Unigene0021908	Unigene0029464	Unigene0028587	Unigene0013483	Unigene0012810	0.00364211	0.0220263	0.165352	0.0691	0.4185
ORTHOMCL7548	Unigene0023137	Unigene0005832	Unigene0002744	Unigene0007353	Unigene0014521	Unigene0026855	Unigene0017669	Unigene0010621	Unigene0028123	Unigene0022492	Unigene0028806	0.00168947	0.0102158	0.165379	0.0321	0.1942
ORTHOMCL4505	Unigene0000407	Unigene0027345	Unigene0000053	Unigene0025523	Unigene0001089	Unigene0045829	Unigene0008113	Unigene0042182	Unigene0032814	Unigene0016061	Unigene0039423	0.00464737	0.0280895	0.165449	0.0883	0.5338
ORTHOMCL4414	Unigene0001642	Unigene0014039	Unigene0006921	Unigene0000447	Unigene0000912	Unigene0000957	Unigene0000909	Unigene0000020	Unigene0000319	Unigene0028510	Unigene0000962	0.00432105	0.0261158	0.165457	0.0822	0.4962
ORTHOMCL4859	Unigene0000401	Unigene0006876	Unigene0001085	Unigene0032918	Unigene0038389	Unigene0006603	Unigene0026511	Unigene0000483	Unigene0000226	Unigene0022360	Unigene0009305	0.00458421	0.0277	0.165495	0.0868	0.5264
ORTHOMCL8095	Unigene0039767	Unigene0036421	Unigene0024368	Unigene0033622	Unigene0046081	Unigene0042629	Unigene0046798	Unigene0005889	Unigene0039679	Unigene0003331	Unigene0032410	0.00475789	0.0287316	0.165598	0.0905	0.5458
ORTHOMCL4836	Unigene0038643	Unigene0023252	Unigene0021414	Unigene0016637	Unigene0001218	Unigene0000214	Unigene0000236	Unigene0000568	Unigene0016559	Unigene0027827	Unigene0034662	0.00371579	0.0224368	0.165611	0.0706	0.4263
ORTHOMCL4960	Unigene0000295	Unigene0008370	Unigene0007270	Unigene0021840	Unigene0015447	Unigene0016239	Unigene0030273	Unigene0028443	Unigene0033396	Unigene0013992	Unigene0034974	0.00645789	0.0389684	0.165721	0.1227	0.7406
ORTHOMCL9676	Unigene0038330	Unigene0009383	Unigene0040489	Unigene0031768	Unigene0026981	Unigene0022017	Unigene0028467	Unigene0041967	Unigene0006968	Unigene0013743	Unigene0006679	0.00400526	0.0241684	0.165723	0.076	0.4592
ORTHOMCL9206	Unigene0013013	Unigene0017284	Unigene0036231	Unigene0018957	Unigene0020952	Unigene0032921	Unigene0026649	Unigene0005175	Unigene0040422	Unigene0011687	Unigene0033505	0.00403684	0.0243526	0.165766	0.0768	0.4627
ORTHOMCL4798	Unigene0037712	Unigene0027212	Unigene0034481	Unigene0002769	Unigene0004930	Unigene0023078	Unigene0000194	Unigene0026167	Unigene0031959	Unigene0011137	Unigene0028727	0.00442632	0.0267	0.16578	0.084	0.5075
ORTHOMCL7395	Unigene0042331	Unigene0039089	Unigene0002591	Unigene0037943	Unigene0013910	Unigene0005367	Unigene0007753	Unigene0046296	Unigene0031941	Unigene0046700	Unigene0036089	0.0733579	0.442474	0.16579	1.3937	8.407
ORTHOMCL6898	Unigene0037970	Unigene0033611	Unigene0013260	Unigene0039581	Unigene0002138	Unigene0042296	Unigene0026626	Unigene0046172	Unigene0018881	Unigene0024325	Unigene0035207	0.00416316	0.0250842	0.165967	0.079	0.4764
ORTHOMCL5501	Unigene0039771	Unigene0024227	Unigene0042332	Unigene0032233	Unigene0026303	Unigene0032683	Unigene0000934	Unigene0006824	Unigene0013396	Unigene0017095	Unigene0027742	0.00403158	0.0242737	0.166088	0.0764	0.4615
ORTHOMCL5170	Unigene0000591	Unigene0036660	Unigene0005032	Unigene0034864	Unigene0024729	Unigene0026315	Unigene0000462	Unigene0035464	Unigene0039669	Unigene0036950	Unigene0007685	0.00270526	0.0162737	0.166235	0.0515	0.3092
ORTHOMCL5444	Unigene0001070	Unigene0022138	Unigene0035967	Unigene0021793	Unigene0047426	Unigene0009772	Unigene0048240	Unigene0046575	Unigene0026235	Unigene0044205	Unigene0000828	0.00377895	0.0227316	0.166242	0.0717	0.432
ORTHOMCL5282	Unigene0004803	Unigene0003475	Unigene0018423	Unigene0033354	Unigene0030524	Unigene0019409	Unigene0000565	Unigene0005438	Unigene0018029	Unigene0046028	Unigene0034660	0.00375263	0.0225684	0.166278	0.0712	0.4289
ORTHOMCL6000	Unigene0004712	Unigene0005535	Unigene0042383	Unigene0011211	Unigene0001443	Unigene0008883	Unigene0008489	Unigene0043057	Unigene0001692	Unigene0013103	Unigene0003793	0.00123158	0.00740526	0.166311	0.0234	0.1408
ORTHOMCL4975	Unigene0000302	Unigene0036372	Unigene0040606	Unigene0038692	Unigene0045570	Unigene0005975	Unigene0042692	Unigene0044000	Unigene0042054	Unigene0005299	Unigene0036601	0.00276842	0.0166368	0.166403	0.0527	0.3161
ORTHOMCL8488	Unigene0023900	Unigene0022130	Unigene0032964	Unigene0032328	Unigene0036115	Unigene0031423	Unigene0003821	Unigene0042839	Unigene0037317	Unigene0046209	Unigene0030474	0.0045	0.0270421	0.166407	0.0856	0.5139
ORTHOMCL8170	Unigene0044164	Unigene0014384	Unigene0032601	Unigene0005489	Unigene0004036	Unigene0007262	Unigene0004228	Unigene0046786	Unigene0003416	Unigene0023235	Unigene0011456	0.00178421	0.0107211	0.166421	0.0338	0.2039
ORTHOMCL5002	Unigene0000321	Unigene0033276	Unigene0017744	Unigene0014574	Unigene0012512	Unigene0007479	Unigene0045699	Unigene0024738	Unigene0034294	Unigene0018905	Unigene0019853	0.00124211	0.00746316	0.166432	0.0235	0.1418
ORTHOMCL6822	Unigene0023556	Unigene0040965	Unigene0040394	Unigene0002073	Unigene0043953	Unigene0021806	Unigene0019124	Unigene0007235	Unigene0041809	Unigene0046322	Unigene0033771	0.00531053	0.0318947	0.166502	0.1011	0.606
ORTHOMCL6141	Unigene0025774	Unigene0008565	Unigene0017793	Unigene0003647	Unigene0001547	Unigene0006190	Unigene0042898	Unigene0008495	Unigene0020965	Unigene0042520	Unigene0012024	0.00144211	0.00865789	0.166565	0.0273	0.1644
ORTHOMCL4601	Unigene0037340	Unigene0034246	Unigene0029108	Unigene0000090	Unigene0000246	Unigene0024227	Unigene0000435	Unigene0041906	Unigene0026925	Unigene0001094	Unigene0015705	0.00534211	0.0320684	0.166585	0.1013	0.6092
ORTHOMCL8263	Unigene0003529	Unigene0039259	Unigene0042077	Unigene0032616	Unigene0007552	Unigene0029708	Unigene0043444	Unigene0020128	Unigene0036761	Unigene0029912	Unigene0037575	0.002	0.0119947	0.16674	0.038	0.2277
ORTHOMCL9650	Unigene0015477	Unigene0009568	Unigene0019313	Unigene0006562	Unigene0047947	Unigene0024071	Unigene0013639	Unigene0042209	Unigene0022093	Unigene0020296	Unigene0015601	0.00322105	0.0193053	0.166848	0.0611	0.3668
ORTHOMCL10593	Unigene0033831	Unigene0029244	Unigene0030350	Unigene0025446	Unigene0013735	Unigene0025932	Unigene0045758	Unigene0046848	Unigene0027314	Unigene0037018	Unigene0025154	0.00166842	0.00999474	0.16693	0.0317	0.19
ORTHOMCL10638	Unigene0032215	Unigene0037655	Unigene0032036	Unigene0027905	Unigene0014502	Unigene0020268	Unigene0039507	Unigene0025576	Unigene0028549	Unigene0039065	Unigene0026708	0.00143158	0.00857368	0.166974	0.0273	0.1629
ORTHOMCL10825	Unigene0041970	Unigene0039829	Unigene0041565	Unigene0027100	Unigene0042427	Unigene0031201	Unigene0044771	Unigene0018319	Unigene0021608	Unigene0049533	Unigene0023026	0.000852632	0.00510526	0.16701	0.016	0.0971
ORTHOMCL9284	Unigene0035045	Unigene0030142	Unigene0023122	Unigene0023575	Unigene0047840	Unigene0037608	Unigene0024791	Unigene0005373	Unigene0014606	Unigene0039753	Unigene0018255	0.000689474	0.00412632	0.167092	0.0132	0.0786
ORTHOMCL7970	Unigene0044858	Unigene0029475	Unigene0020240	Unigene0003183	Unigene0040685	Unigene0046633	Unigene0034710	Unigene0044749	Unigene0035184	Unigene0026345	Unigene0039382	0.00232105	0.0138895	0.167109	0.0442	0.264
ORTHOMCL6585	Unigene0045283	Unigene0037389	Unigene0042916	Unigene0004648	Unigene0036929	Unigene0001899	Unigene0044473	Unigene0045227	Unigene0040224	Unigene0007027	Unigene0038479	0.00108421	0.00648421	0.167208	0.0207	0.1234
ORTHOMCL6871	Unigene0017724	Unigene0039477	Unigene0002111	Unigene0021036	Unigene0041828	Unigene0017732	Unigene0042569	Unigene0040638	Unigene0020031	Unigene0019286	Unigene0021512	0.00182105	0.0108895	0.167231	0.0347	0.207
ORTHOMCL7989	Unigene0003207	Unigene0010192	Unigene0035183	Unigene0003213	Unigene0041169	Unigene0042727	Unigene0018473	Unigene0044551	Unigene0015132	Unigene0044260	Unigene0037913	0.00455263	0.0272158	0.167279	0.0865	0.5172
ORTHOMCL10678	Unigene0017791	Unigene0015596	Unigene0017614	Unigene0020221	Unigene0032355	Unigene0025577	Unigene0034588	Unigene0045479	Unigene0023014	Unigene0015118	Unigene0021616	0.00154737	0.00924737	0.167331	0.0295	0.1757
ORTHOMCL5077	Unigene0000388	Unigene0019006	Unigene0021789	Unigene0033037	Unigene0042607	Unigene0027400	Unigene0047173	Unigene0029183	Unigene0035423	Unigene0006056	Unigene0035184	0.00127368	0.00761053	0.167358	0.0241	0.1447
ORTHOMCL4542	Unigene0037872	Unigene0014631	Unigene0000067	Unigene0041070	Unigene0030228	Unigene0039861	Unigene0047523	Unigene0040261	Unigene0041238	Unigene0011913	Unigene0035256	0.00441053	0.0263105	0.167634	0.084	0.5
ORTHOMCL5719	Unigene0004307	Unigene0012080	Unigene0023955	Unigene0040920	Unigene0001217	Unigene0040147	Unigene0024104	Unigene0015060	Unigene0040802	Unigene0005044	Unigene0003508	0.00272105	0.0162316	0.167639	0.0516	0.3084
ORTHOMCL9130	Unigene0031135	Unigene0005005	Unigene0015126	Unigene0038507	Unigene0007233	Unigene0020878	Unigene0029333	Unigene0022442	Unigene0026138	Unigene0032040	Unigene0032045	0.00267368	0.0159474	0.167657	0.0508	0.3031
ORTHOMCL5927	Unigene0030551	Unigene0013030	Unigene0015089	Unigene0015135	Unigene0032040	Unigene0003995	Unigene0010963	Unigene0044613	Unigene0010198	Unigene0039562	Unigene0001399	0.0167947	0.100163	0.167674	0.319	1.9031
ORTHOMCL10051	Unigene0040695	Unigene0013236	Unigene0042133	Unigene0023404	Unigene0032514	Unigene0017005	Unigene0008419	Unigene0041259	Unigene0033754	Unigene0045449	Unigene0021614	0.00499474	0.0297842	0.167697	0.0949	0.566
ORTHOMCL6946	Unigene0045449	Unigene0035455	Unigene0036064	Unigene0034779	Unigene0020839	Unigene0002176	Unigene0030794	Unigene0043305	Unigene0008673	Unigene0046930	Unigene0034370	0.000978947	0.00583684	0.167719	0.0184	0.1109
ORTHOMCL10329	Unigene0010703	Unigene0035717	Unigene0036791	Unigene0034865	Unigene0043427	Unigene0039256	Unigene0033148	Unigene0024790	Unigene0036661	Unigene0044172	Unigene0034876	0.000657895	0.00392105	0.167785	0.0127	0.0744
ORTHOMCL6369	Unigene0039285	Unigene0001728	Unigene0043382	Unigene0036931	Unigene0039470	Unigene0041442	Unigene0041275	Unigene0044691	Unigene0042371	Unigene0001960	Unigene0036218	0.00124211	0.0074	0.167852	0.0235	0.1407
ORTHOMCL10249	Unigene0027289	Unigene0016716	Unigene0020396	Unigene0035649	Unigene0032365	Unigene0010053	Unigene0022325	Unigene0027605	Unigene0015940	Unigene0039829	Unigene0016432	0.00159474	0.0095	0.167867	0.0304	0.1806
ORTHOMCL9502	Unigene0016794	Unigene0006065	Unigene0014002	Unigene0029534	Unigene0020520	Unigene0036523	Unigene0037155	Unigene0008287	Unigene0030496	Unigene0042956	Unigene0027344	0.00180526	0.0107474	0.167973	0.0345	0.2042
ORTHOMCL5728	Unigene0023683	Unigene0011043	Unigene0026034	Unigene0010501	Unigene0016944	Unigene0015256	Unigene0005369	Unigene0002188	Unigene0038851	Unigene0017881	Unigene0001224	0.00406842	0.0242158	0.168007	0.0773	0.4599
ORTHOMCL6839	Unigene0032585	Unigene0019111	Unigene0023624	Unigene0013607	Unigene0010715	Unigene0040963	Unigene0027970	Unigene0002089	Unigene0034397	Unigene0018871	Unigene0021681	0.00468947	0.0279105	0.168018	0.0892	0.5305
ORTHOMCL6934	Unigene0018403	Unigene0013549	Unigene0027686	Unigene0026038	Unigene0012947	Unigene0020448	Unigene0045934	Unigene0030713	Unigene0002168	Unigene0014828	Unigene0017221	0.00160526	0.00955263	0.168044	0.0306	0.1815
ORTHOMCL6520	Unigene0019111	Unigene0012074	Unigene0018720	Unigene0001837	Unigene0007882	Unigene0023869	Unigene0030499	Unigene0034628	Unigene0022917	Unigene0014759	Unigene0021644	0.00135789	0.00807895	0.168078	0.0258	0.1536
ORTHOMCL8134	Unigene0006622	Unigene0008220	Unigene0026406	Unigene0029058	Unigene0010077	Unigene0033038	Unigene0048276	Unigene0003374	Unigene0003769	Unigene0012497	Unigene0023198	0.00112632	0.0067	0.168107	0.0215	0.1274
ORTHOMCL5126	Unigene0039929	Unigene0007246	Unigene0025038	Unigene0028472	Unigene0043133	Unigene0000431	Unigene0000702	Unigene0015464	Unigene0038839	Unigene0001068	Unigene0039172	0.00592632	0.0352	0.168361	0.1125	0.6688
ORTHOMCL5963	Unigene0015393	Unigene0017435	Unigene0035619	Unigene0018978	Unigene0032476	Unigene0024724	Unigene0026359	Unigene0026035	Unigene0037733	Unigene0001423	Unigene0033616	0.00130526	0.00775263	0.168364	0.0248	0.1473
ORTHOMCL10991	Unigene0038541	Unigene0036661	Unigene0033861	Unigene0035010	Unigene0037751	Unigene0039851	Unigene0029950	Unigene0040436	Unigene0034522	Unigene0031193	Unigene0033444	0.00656316	0.0389789	0.168377	0.1247	0.7407
ORTHOMCL8087	Unigene0037754	Unigene0027925	Unigene0012387	Unigene0033938	Unigene0024425	Unigene0006407	Unigene0025700	Unigene0034502	Unigene0027788	Unigene0004188	Unigene0003325	0.00132105	0.00784211	0.168456	0.0251	0.1489
ORTHOMCL8599	Unigene0030406	Unigene0005450	Unigene0016252	Unigene0035737	Unigene0003988	Unigene0042571	Unigene0046669	Unigene0041010	Unigene0033568	Unigene0046216	Unigene0035653	0.00169474	0.0100579	0.168498	0.0322	0.1911
ORTHOMCL6223	Unigene0043089	Unigene0020641	Unigene0042727	Unigene0026619	Unigene0012528	Unigene0044501	Unigene0019966	Unigene0041488	Unigene0001620	Unigene0028288	Unigene0019457	0.00615263	0.0365053	0.168541	0.1169	0.6934
ORTHOMCL9196	Unigene0007016	Unigene0017349	Unigene0039285	Unigene0037544	Unigene0044198	Unigene0042110	Unigene0024079	Unigene0042406	Unigene0005153	Unigene0045009	Unigene0034024	0.0533211	0.316263	0.168597	1.0131	6.009
ORTHOMCL9642	Unigene0014438	Unigene0038624	Unigene0033705	Unigene0032542	Unigene0021697	Unigene0042569	Unigene0027610	Unigene0006531	Unigene0035519	Unigene0037281	Unigene0035324	0.000910526	0.0054	0.168616	0.0173	0.1026
ORTHOMCL10000	Unigene0009041	Unigene0016292	Unigene0019789	Unigene0012386	Unigene0027191	Unigene0026367	Unigene0047452	Unigene0045362	Unigene0040204	Unigene0023839	Unigene0008163	0.00391053	0.0231895	0.168634	0.0743	0.4405
ORTHOMCL7829	Unigene0037039	Unigene0003036	Unigene0042945	Unigene0031062	Unigene0019643	Unigene0038264	Unigene0025866	Unigene0005953	Unigene0019538	Unigene0031046	Unigene0029979	0.00122105	0.00723684	0.168727	0.0232	0.1375
ORTHOMCL7623	Unigene0002808	Unigene0036632	Unigene0043584	Unigene0014836	Unigene0023674	Unigene0044248	Unigene0030318	Unigene0021122	Unigene0021604	Unigene0020982	Unigene0015911	0.00525789	0.0311579	0.16875	0.0997	0.5921
ORTHOMCL9278	Unigene0039579	Unigene0041518	Unigene0043737	Unigene0033547	Unigene0046800	Unigene0044559	Unigene0005365	Unigene0040354	Unigene0035579	Unigene0048144	Unigene0023181	0.00104737	0.00620526	0.168787	0.0199	0.1179
ORTHOMCL6345	Unigene0009647	Unigene0032165	Unigene0001706	Unigene0018107	Unigene0010245	Unigene0007711	Unigene0022606	Unigene0003079	Unigene0032428	Unigene0003006	Unigene0001935	0.00113158	0.0067	0.168892	0.0214	0.1275
ORTHOMCL6222	Unigene0015130	Unigene0030225	Unigene0029057	Unigene0013930	Unigene0007220	Unigene0036344	Unigene0013046	Unigene0022521	Unigene0004584	Unigene0015254	Unigene0001619	0.000894737	0.00529474	0.168986	0.0169	0.1007
ORTHOMCL8366	Unigene0037245	Unigene0003661	Unigene0019475	Unigene0010140	Unigene0047809	Unigene0041203	Unigene0045957	Unigene0010614	Unigene0009133	Unigene0048968	Unigene0004923	0.00118421	0.00700526	0.169046	0.0225	0.1331
ORTHOMCL4921	Unigene0032639	Unigene0000262	Unigene0016964	Unigene0034659	Unigene0003068	Unigene0042441	Unigene0044174	Unigene0000674	Unigene0004877	Unigene0044484	Unigene0006606	0.00190526	0.0112684	0.16908	0.0362	0.2141
ORTHOMCL10596	Unigene0017314	Unigene0013813	Unigene0031171	Unigene0024311	Unigene0027113	Unigene0037361	Unigene0034628	Unigene0015846	Unigene0028342	Unigene0032677	Unigene0026856	0.000857895	0.00506842	0.169263	0.0164	0.0964
ORTHOMCL10970	Unigene0035070	Unigene0039687	Unigene0043113	Unigene0038845	Unigene0031742	Unigene0040453	Unigene0028886	Unigene0042642	Unigene0025371	Unigene0033063	Unigene0039867	0.00163684	0.00966842	0.169298	0.0311	0.1839
ORTHOMCL4528	Unigene0001562	Unigene0014786	Unigene0030525	Unigene0029403	Unigene0016066	Unigene0000062	Unigene0022563	Unigene0001443	Unigene0034948	Unigene0016480	Unigene0032584	0.00187368	0.0110632	0.169363	0.0356	0.2104
ORTHOMCL7472	Unigene0012789	Unigene0006599	Unigene0028813	Unigene0002670	Unigene0033827	Unigene0034201	Unigene0040027	Unigene0019017	Unigene0007828	Unigene0036555	Unigene0021309	0.00123158	0.00726842	0.169442	0.0233	0.1381
ORTHOMCL10746	Unigene0040721	Unigene0028508	Unigene0041967	Unigene0019542	Unigene0022882	Unigene0044767	Unigene0044859	Unigene0023112	Unigene0037938	Unigene0046635	Unigene0016417	0.00324737	0.0191579	0.169505	0.0615	0.3641
ORTHOMCL7909	Unigene0025083	Unigene0025000	Unigene0036025	Unigene0017137	Unigene0046994	Unigene0003114	Unigene0009735	Unigene0043092	Unigene0031408	Unigene0033668	Unigene0011679	0.00110526	0.00650526	0.169903	0.0209	0.1235
ORTHOMCL9882	Unigene0007563	Unigene0038556	Unigene0034332	Unigene0012851	Unigene0024215	Unigene0044343	Unigene0034166	Unigene0041574	Unigene0014609	Unigene0023286	Unigene0014989	0.00301579	0.0177474	0.169929	0.0574	0.3371
ORTHOMCL5147	Unigene0038242	Unigene0000446	Unigene0001698	Unigene0036731	Unigene0043114	Unigene0023035	Unigene0027545	Unigene0000617	Unigene0037265	Unigene0033990	Unigene0033825	0.00254737	0.0149842	0.170004	0.0484	0.2848
ORTHOMCL4492	Unigene0005623	Unigene0009149	Unigene0040382	Unigene0006162	Unigene0008431	Unigene0000049	Unigene0000252	Unigene0004046	Unigene0009395	Unigene0017874	Unigene0007334	0.00384211	0.0225947	0.170044	0.0729	0.4293
ORTHOMCL4788	Unigene0019754	Unigene0035286	Unigene0022115	Unigene0003380	Unigene0000501	Unigene0000184	Unigene0029596	Unigene0047489	Unigene0040650	Unigene0043053	Unigene0000936	0.00266316	0.0156526	0.170141	0.0508	0.2975
ORTHOMCL7255	Unigene0033729	Unigene0002455	Unigene0028048	Unigene0021064	Unigene0029869	Unigene0027141	Unigene0025684	Unigene0036129	Unigene0038068	Unigene0028210	Unigene0022873	0.0619	0.363616	0.170235	1.1761	6.9086
ORTHOMCL6338	Unigene0029832	Unigene0031389	Unigene0035383	Unigene0035169	Unigene0019120	Unigene0030384	Unigene0041917	Unigene0001700	Unigene0014771	Unigene0032900	Unigene0037749	0.00202105	0.0118684	0.170288	0.0384	0.2256
ORTHOMCL7672	Unigene0007072	Unigene0035922	Unigene0009854	Unigene0008927	Unigene0002865	Unigene0037503	Unigene0035282	Unigene0025499	Unigene0039411	Unigene0034668	Unigene0004691	0.000989474	0.00581053	0.17029	0.0188	0.1105
ORTHOMCL9518	Unigene0020897	Unigene0033617	Unigene0028669	Unigene0034855	Unigene0039983	Unigene0040613	Unigene0006133	Unigene0043149	Unigene0036577	Unigene0025600	Unigene0028685	0.00415263	0.0243789	0.170337	0.0788	0.4632
ORTHOMCL5724	Unigene0010987	Unigene0038768	Unigene0008536	Unigene0001220	Unigene0004649	Unigene0045392	Unigene0005226	Unigene0035375	Unigene0033771	Unigene0040992	Unigene0039369	0.000921053	0.00540526	0.170399	0.0176	0.1027
ORTHOMCL10018	Unigene0008276	Unigene0035350	Unigene0010633	Unigene0022494	Unigene0045171	Unigene0041739	Unigene0031045	Unigene0027574	Unigene0009923	Unigene0013931	Unigene0025421	0.004	0.0234579	0.170518	0.0761	0.4455
ORTHOMCL5684	Unigene0044157	Unigene0035939	Unigene0001183	Unigene0040139	Unigene0003046	Unigene0006341	Unigene0009999	Unigene0017710	Unigene0009356	Unigene0006278	Unigene0002941	0.00190526	0.0111632	0.170674	0.0361	0.2122
ORTHOMCL5524	Unigene0029155	Unigene0034962	Unigene0034276	Unigene0020120	Unigene0041472	Unigene0000979	Unigene0028647	Unigene0040677	Unigene0000978	Unigene0021632	Unigene0038370	0.00248421	0.0145526	0.170705	0.0472	0.2764
ORTHOMCL8435	Unigene0019476	Unigene0023951	Unigene0039371	Unigene0016366	Unigene0003752	Unigene0045493	Unigene0046758	Unigene0038874	Unigene0039297	Unigene0004300	Unigene0028769	0.00143158	0.00838421	0.170747	0.0275	0.1593
ORTHOMCL10062	Unigene0017444	Unigene0041296	Unigene0008470	Unigene0025166	Unigene0044677	Unigene0014495	Unigene0036891	Unigene0045646	Unigene0035193	Unigene0009846	Unigene0012057	0.000821053	0.00480526	0.170865	0.0156	0.0914
ORTHOMCL9352	Unigene0038100	Unigene0039205	Unigene0034008	Unigene0013661	Unigene0047181	Unigene0005596	Unigene0045924	Unigene0043321	Unigene0016657	Unigene0044598	Unigene0036838	0.00144211	0.00843684	0.17093	0.0274	0.1602
ORTHOMCL6632	Unigene0003283	Unigene0005594	Unigene0007198	Unigene0006284	Unigene0047260	Unigene0001936	Unigene0008855	Unigene0005133	Unigene0033600	Unigene0014120	Unigene0006336	0.00485263	0.0283895	0.170931	0.0922	0.5395
ORTHOMCL5440	Unigene0037747	Unigene0006746	Unigene0010406	Unigene0023165	Unigene0040443	Unigene0023385	Unigene0000811	Unigene0040950	Unigene0009217	Unigene0025829	Unigene0031569	0.00196842	0.0115105	0.171011	0.0374	0.2186
ORTHOMCL6536	Unigene0038701	Unigene0001849	Unigene0038566	Unigene0015652	Unigene0024088	Unigene0020828	Unigene0018781	Unigene0035675	Unigene0039443	Unigene0046307	Unigene0032128	0.00109474	0.0064	0.171053	0.0208	0.1216
ORTHOMCL4725	Unigene0021587	Unigene0026950	Unigene0020574	Unigene0038959	Unigene0015243	Unigene0011128	Unigene0011793	Unigene0040533	Unigene0023750	Unigene0045757	Unigene0000151	0.00567895	0.0331947	0.17108	0.1079	0.6307
ORTHOMCL7133	Unigene0040771	Unigene0037103	Unigene0035743	Unigene0034739	Unigene0043584	Unigene0034283	Unigene0038256	Unigene0002353	Unigene0019727	Unigene0039592	Unigene0034239	0.000742105	0.00433684	0.171117	0.0141	0.0823
ORTHOMCL5149	Unigene0044434	Unigene0033391	Unigene0009339	Unigene0005141	Unigene0009182	Unigene0000447	Unigene0007212	Unigene0016374	Unigene0033888	Unigene0048625	Unigene0002025	0.00208947	0.0122053	0.171194	0.0397	0.2319
ORTHOMCL8104	Unigene0044949	Unigene0039453	Unigene0021359	Unigene0018042	Unigene0046181	Unigene0018849	Unigene0003340	Unigene0035133	Unigene0042409	Unigene0015500	Unigene0017628	0.00168421	0.00983684	0.171215	0.0319	0.1869
ORTHOMCL5711	Unigene0032722	Unigene0037777	Unigene0022971	Unigene0012485	Unigene0028265	Unigene0004630	Unigene0013802	Unigene0030264	Unigene0015058	Unigene0049462	Unigene0001208	0.00119474	0.00697368	0.171321	0.0226	0.1324
ORTHOMCL10747	Unigene0034865	Unigene0031777	Unigene0020907	Unigene0016436	Unigene0036341	Unigene0038480	Unigene0023123	Unigene0045353	Unigene0020179	Unigene0023746	Unigene0024656	0.00146316	0.00853684	0.171393	0.0278	0.1622
ORTHOMCL8069	Unigene0005463	Unigene0034745	Unigene0003946	Unigene0003299	Unigene0037603	Unigene0014166	Unigene0032012	Unigene0045996	Unigene0013643	Unigene0044815	Unigene0031567	0.00426316	0.0248684	0.171429	0.0809	0.4726
ORTHOMCL10658	Unigene0036385	Unigene0019897	Unigene0018787	Unigene0014744	Unigene0032260	Unigene0028003	Unigene0028663	Unigene0026972	Unigene0019506	Unigene0039042	Unigene0028925	0.00139474	0.00813158	0.171521	0.0265	0.1545
ORTHOMCL4503	Unigene0012520	Unigene0036774	Unigene0000112	Unigene0004512	Unigene0004110	Unigene0000052	Unigene0005527	Unigene0022833	Unigene0014528	Unigene0001855	Unigene0038816	0.00362105	0.0211	0.171614	0.069	0.401
ORTHOMCL7644	Unigene0030600	Unigene0021387	Unigene0037992	Unigene0034448	Unigene0046390	Unigene0005298	Unigene0004974	Unigene0028285	Unigene0014808	Unigene0002833	Unigene0036465	0.000821053	0.00478421	0.171617	0.0155	0.0909
ORTHOMCL4473	Unigene0001329	Unigene0000044	Unigene0019605	Unigene0000896	Unigene0041526	Unigene0020275	Unigene0038644	Unigene0023480	Unigene0034171	Unigene0030588	Unigene0021041	0.00386842	0.0225368	0.171649	0.0736	0.4283
ORTHOMCL9662	Unigene0033045	Unigene0006608	Unigene0012581	Unigene0010167	Unigene0037397	Unigene0044661	Unigene0015275	Unigene0018994	Unigene0034324	Unigene0042393	Unigene0027397	0.00122632	0.00714211	0.171702	0.0233	0.1358
ORTHOMCL6468	Unigene0003236	Unigene0002207	Unigene0001794	Unigene0010073	Unigene0026196	Unigene0005612	Unigene0015704	Unigene0010917	Unigene0034165	Unigene0026638	Unigene0014850	0.00355789	0.0207158	0.171748	0.0676	0.3936
ORTHOMCL9183	Unigene0039271	Unigene0005127	Unigene0036733	Unigene0020764	Unigene0026947	Unigene0039807	Unigene0010465	Unigene0017070	Unigene0041327	Unigene0020531	Unigene0014714	0.00246842	0.0143684	0.171795	0.0468	0.2731
ORTHOMCL10050	Unigene0008411	Unigene0037877	Unigene0040707	Unigene0039347	Unigene0040586	Unigene0022125	Unigene0027708	Unigene0030672	Unigene0027235	Unigene0044066	Unigene0030175	0.00247895	0.0144211	0.171898	0.047	0.2739
ORTHOMCL5500	Unigene0022609	Unigene0004768	Unigene0011879	Unigene0005287	Unigene0006600	Unigene0045721	Unigene0006974	Unigene0041490	Unigene0017725	Unigene0029797	Unigene0000932	0.00304737	0.0177158	0.172014	0.0578	0.3366
ORTHOMCL5614	Unigene0023921	Unigene0033918	Unigene0026085	Unigene0036957	Unigene0045879	Unigene0001659	Unigene0001112	Unigene0027640	Unigene0035640	Unigene0049505	Unigene0016641	0.00172105	0.0100053	0.172015	0.0326	0.1902
ORTHOMCL8629	Unigene0021273	Unigene0005801	Unigene0012144	Unigene0004038	Unigene0025467	Unigene0008069	Unigene0020438	Unigene0014471	Unigene0004665	Unigene0017776	Unigene0007777	0.0011	0.00639474	0.172016	0.0209	0.1215
ORTHOMCL5573	Unigene0005650	Unigene0010203	Unigene0037319	Unigene0019368	Unigene0043912	Unigene0007917	Unigene0030968	Unigene0001064	Unigene0036663	Unigene0044039	Unigene0018534	0.00222632	0.0129421	0.172021	0.0423	0.246
ORTHOMCL5134	Unigene0019024	Unigene0033392	Unigene0037918	Unigene0023797	Unigene0045480	Unigene0043300	Unigene0031983	Unigene0000437	Unigene0028566	Unigene0007542	Unigene0037380	0.00330526	0.0192053	0.172102	0.0629	0.3648
ORTHOMCL7969	Unigene0021230	Unigene0037471	Unigene0004402	Unigene0040043	Unigene0005936	Unigene0041420	Unigene0043732	Unigene0005111	Unigene0006141	Unigene0003181	Unigene0037979	0.00114211	0.00663158	0.172222	0.0218	0.1259
ORTHOMCL6771	Unigene0005256	Unigene0015655	Unigene0009739	Unigene0016160	Unigene0007975	Unigene0008063	Unigene0002036	Unigene0004947	Unigene0004378	Unigene0006619	Unigene0025546	0.00334211	0.0194053	0.172227	0.0636	0.3686
ORTHOMCL9151	Unigene0024154	Unigene0007063	Unigene0036473	Unigene0012634	Unigene0005057	Unigene0007846	Unigene0005735	Unigene0044496	Unigene0010889	Unigene0015259	Unigene0005084	0.00425263	0.0246895	0.172245	0.0808	0.4692
ORTHOMCL6422	Unigene0002309	Unigene0007056	Unigene0025931	Unigene0037378	Unigene0026371	Unigene0011190	Unigene0034579	Unigene0042993	Unigene0010037	Unigene0045562	Unigene0001763	0.00129474	0.00751579	0.172269	0.0248	0.143
ORTHOMCL10231	Unigene0026124	Unigene0035331	Unigene0037512	Unigene0039035	Unigene0026105	Unigene0011954	Unigene0027521	Unigene0009857	Unigene0017389	Unigene0019470	Unigene0030118	0.00123158	0.00714737	0.172312	0.0232	0.1358
ORTHOMCL10732	Unigene0030574	Unigene0030990	Unigene0031385	Unigene0026219	Unigene0016125	Unigene0038717	Unigene0036959	Unigene0042441	Unigene0030627	Unigene0038208	Unigene0028203	0.00156842	0.0091	0.172354	0.0299	0.173
ORTHOMCL5870	Unigene0007900	Unigene0038028	Unigene0040185	Unigene0031869	Unigene0018895	Unigene0001365	Unigene0001934	Unigene0017554	Unigene0023030	Unigene0045407	Unigene0033636	0.000831579	0.00482105	0.172489	0.0157	0.0916
ORTHOMCL7546	Unigene0007769	Unigene0003095	Unigene0016008	Unigene0028048	Unigene0045008	Unigene0045071	Unigene0047008	Unigene0008817	Unigene0010755	Unigene0016478	Unigene0002742	0.000863158	0.00499474	0.172813	0.0163	0.0948
ORTHOMCL6784	Unigene0003433	Unigene0042096	Unigene0038140	Unigene0039998	Unigene0002470	Unigene0044827	Unigene0002044	Unigene0031133	Unigene0030744	Unigene0009019	Unigene0039453	0.00503684	0.0291368	0.172868	0.0956	0.5537
ORTHOMCL6383	Unigene0022071	Unigene0007358	Unigene0040737	Unigene0025925	Unigene0031398	Unigene0009858	Unigene0001737	Unigene0004818	Unigene0013133	Unigene0026358	Unigene0003736	0.00371579	0.0214842	0.172954	0.0705	0.4082
ORTHOMCL8778	Unigene0010635	Unigene0034017	Unigene0042733	Unigene0015752	Unigene0018491	Unigene0023292	Unigene0004312	Unigene0005692	Unigene0014246	Unigene0014486	Unigene0032445	0.00593158	0.0342579	0.173145	0.1128	0.6508
ORTHOMCL8705	Unigene0042278	Unigene0030972	Unigene0004186	Unigene0028270	Unigene0039146	Unigene0046460	Unigene0046859	Unigene0038664	Unigene0035935	Unigene0008986	Unigene0039894	0.00121579	0.00702105	0.173163	0.023	0.1335
ORTHOMCL8886	Unigene0030264	Unigene0030814	Unigene0022633	Unigene0031305	Unigene0004896	Unigene0041886	Unigene0025400	Unigene0040390	Unigene0041816	Unigene0030757	Unigene0004522	0.00243684	0.0140684	0.173214	0.0462	0.2674
ORTHOMCL7170	Unigene0022143	Unigene0036221	Unigene0017506	Unigene0011654	Unigene0046005	Unigene0002385	Unigene0047929	Unigene0044859	Unigene0003432	Unigene0018752	Unigene0012013	0.000621053	0.00358421	0.173275	0.0118	0.0681
ORTHOMCL4570	Unigene0000390	Unigene0041239	Unigene0040306	Unigene0018132	Unigene0012391	Unigene0043822	Unigene0048350	Unigene0047269	Unigene0039992	Unigene0003426	Unigene0000077	0.00392105	0.0225947	0.173538	0.0746	0.4295
ORTHOMCL5292	Unigene0008212	Unigene0018050	Unigene0024042	Unigene0019648	Unigene0045555	Unigene0026124	Unigene0037707	Unigene0000581	Unigene0018122	Unigene0016799	Unigene0032000	0.0043	0.0247737	0.173571	0.0817	0.4707
ORTHOMCL9454	Unigene0043176	Unigene0019849	Unigene0037400	Unigene0034054	Unigene0038609	Unigene0005875	Unigene0047671	Unigene0042143	Unigene0036382	Unigene0030981	Unigene0033732	0.00176316	0.0101579	0.173575	0.0335	0.1931
ORTHOMCL8832	Unigene0042340	Unigene0020027	Unigene0040422	Unigene0039701	Unigene0033664	Unigene0042127	Unigene0041762	Unigene0029590	Unigene0004425	Unigene0044411	Unigene0016029	0.00412105	0.0237421	0.173576	0.0785	0.451
ORTHOMCL6976	Unigene0002203	Unigene0035060	Unigene0032773	Unigene0016433	Unigene0045141	Unigene0042830	Unigene0018224	Unigene0004647	Unigene0010016	Unigene0035527	Unigene0035978	0.000594737	0.00342632	0.173579	0.0112	0.0651
ORTHOMCL5484	Unigene0009160	Unigene0038085	Unigene0007627	Unigene0031701	Unigene0003880	Unigene0029425	Unigene0046525	Unigene0000897	Unigene0006043	Unigene0033535	Unigene0032599	0.000831579	0.00478947	0.173626	0.0157	0.091
ORTHOMCL9827	Unigene0014912	Unigene0032087	Unigene0040188	Unigene0007739	Unigene0009522	Unigene0007293	Unigene0044057	Unigene0042712	Unigene0007533	Unigene0046103	Unigene0022314	0.000915789	0.00527368	0.173653	0.0175	0.1002
ORTHOMCL9632	Unigene0037775	Unigene0006485	Unigene0016499	Unigene0020093	Unigene0021404	Unigene0026894	Unigene0016560	Unigene0042166	Unigene0037788	Unigene0043329	Unigene0014051	0.00416316	0.0239526	0.173808	0.0791	0.4552
ORTHOMCL8817	Unigene0009813	Unigene0004405	Unigene0037799	Unigene0034110	Unigene0031812	Unigene0046809	Unigene0040269	Unigene0021277	Unigene0017161	Unigene0027887	Unigene0039280	0.00125789	0.00723684	0.173818	0.0239	0.1376
ORTHOMCL4884	Unigene0044780	Unigene0000240	Unigene0021380	Unigene0005345	Unigene0008014	Unigene0003728	Unigene0000387	Unigene0043093	Unigene0034043	Unigene0029972	Unigene0037340	0.00195789	0.0112579	0.173913	0.0374	0.2141
ORTHOMCL6470	Unigene0037463	Unigene0034928	Unigene0034795	Unigene0040180	Unigene0008599	Unigene0021183	Unigene0008887	Unigene0006407	Unigene0015162	Unigene0001796	Unigene0036862	0.00115789	0.00665263	0.174051	0.0221	0.1265
ORTHOMCL6237	Unigene0037825	Unigene0028485	Unigene0041943	Unigene0001904	Unigene0034246	Unigene0038929	Unigene0001627	Unigene0042560	Unigene0033902	Unigene0031674	Unigene0001839	0.00142632	0.00819474	0.174053	0.027	0.1558
ORTHOMCL9713	Unigene0037519	Unigene0031975	Unigene0040815	Unigene0022552	Unigene0014166	Unigene0016415	Unigene0024149	Unigene0006815	Unigene0041599	Unigene0047010	Unigene0016316	0.00463158	0.0265842	0.174223	0.0879	0.5051
ORTHOMCL6226	Unigene0030235	Unigene0002277	Unigene0009297	Unigene0010088	Unigene0020195	Unigene0024363	Unigene0034053	Unigene0022076	Unigene0001621	Unigene0013057	Unigene0015044	0.00534737	0.0306895	0.174241	0.1016	0.5831
ORTHOMCL5638	Unigene0027157	Unigene0022925	Unigene0002325	Unigene0029160	Unigene0029356	Unigene0037381	Unigene0035569	Unigene0036396	Unigene0001137	Unigene0025632	Unigene0023332	0.00124737	0.00715789	0.174265	0.0238	0.1359
ORTHOMCL6653	Unigene0041940	Unigene0041547	Unigene0033690	Unigene0029514	Unigene0025207	Unigene0043674	Unigene0002687	Unigene0002290	Unigene0001950	Unigene0023992	Unigene0032223	0.00186316	0.0106789	0.17447	0.0354	0.203
ORTHOMCL8565	Unigene0003946	Unigene0024178	Unigene0042634	Unigene0036786	Unigene0041686	Unigene0039822	Unigene0046007	Unigene0040863	Unigene0013940	Unigene0045877	Unigene0031161	0.00612105	0.0350737	0.17452	0.1164	0.6664
ORTHOMCL7542	Unigene0043686	Unigene0033143	Unigene0031923	Unigene0032663	Unigene0041154	Unigene0042071	Unigene0040858	Unigene0032192	Unigene0002736	Unigene0011743	Unigene0038564	0.00606842	0.0347684	0.174538	0.1155	0.6607
ORTHOMCL10814	Unigene0034052	Unigene0030669	Unigene0033192	Unigene0025759	Unigene0040213	Unigene0031282	Unigene0039782	Unigene0029924	Unigene0018174	Unigene0042063	Unigene0024346	0.00124211	0.00711579	0.174556	0.0236	0.1352
ORTHOMCL6811	Unigene0046102	Unigene0040625	Unigene0016247	Unigene0017125	Unigene0002068	Unigene0002169	Unigene0008711	Unigene0003405	Unigene0017507	Unigene0021156	Unigene0022478	0.00241579	0.0138368	0.174591	0.046	0.2629
ORTHOMCL7422	Unigene0044344	Unigene0041574	Unigene0002617	Unigene0015389	Unigene0031232	Unigene0034332	Unigene0027143	Unigene0047826	Unigene0040499	Unigene0012032	Unigene0007113	0.000978947	0.00560526	0.174648	0.0186	0.1066
ORTHOMCL6975	Unigene0007394	Unigene0024882	Unigene0013591	Unigene0017587	Unigene0031751	Unigene0043607	Unigene0004639	Unigene0025016	Unigene0009536	Unigene0002202	Unigene0031366	0.0569421	0.325911	0.174717	1.0821	6.1925
ORTHOMCL9839	Unigene0021616	Unigene0030151	Unigene0028825	Unigene0029103	Unigene0025961	Unigene0015262	Unigene0037882	Unigene0008870	Unigene0018841	Unigene0026983	Unigene0007335	0.00138947	0.00795263	0.174719	0.0263	0.1513
ORTHOMCL8381	Unigene0005654	Unigene0022418	Unigene0014216	Unigene0012559	Unigene0043250	Unigene0033058	Unigene0003679	Unigene0015388	Unigene0022082	Unigene0011915	Unigene0007577	0.00134737	0.00771053	0.174744	0.0255	0.1467
ORTHOMCL5306	Unigene0000596	Unigene0039692	Unigene0039576	Unigene0004769	Unigene0004077	Unigene0026521	Unigene0008236	Unigene0042731	Unigene0004670	Unigene0009592	Unigene0036776	0.00405263	0.0231789	0.174841	0.0771	0.4406
ORTHOMCL8697	Unigene0040518	Unigene0036379	Unigene0010249	Unigene0031973	Unigene0043707	Unigene0041229	Unigene0042522	Unigene0007833	Unigene0004771	Unigene0004170	Unigene0035288	0.00239474	0.0136947	0.174865	0.0455	0.2603
ORTHOMCL9869	Unigene0041105	Unigene0025305	Unigene0033977	Unigene0016913	Unigene0029921	Unigene0027055	Unigene0027643	Unigene0021705	Unigene0007492	Unigene0018873	Unigene0028983	0.00452632	0.0258684	0.174975	0.0858	0.4915
ORTHOMCL7619	Unigene0004447	Unigene0002806	Unigene0042386	Unigene0037065	Unigene0004313	Unigene0032563	Unigene0043396	Unigene0043153	Unigene0042142	Unigene0032389	Unigene0038863	0.00127368	0.00727368	0.175109	0.0241	0.1381
ORTHOMCL5523	Unigene0033091	Unigene0000976	Unigene0038387	Unigene0034344	Unigene0043846	Unigene0043150	Unigene0030134	Unigene0041723	Unigene0003446	Unigene0001961	Unigene0030475	0.00464737	0.0265316	0.175164	0.0883	0.5042
ORTHOMCL10446	Unigene0022670	Unigene0022581	Unigene0011976	Unigene0037362	Unigene0045686	Unigene0036246	Unigene0027511	Unigene0018041	Unigene0011944	Unigene0045104	Unigene0018591	0.00252105	0.0143895	0.175201	0.0477	0.2735
ORTHOMCL4687	Unigene0001736	Unigene0012994	Unigene0035562	Unigene0035910	Unigene0042883	Unigene0046390	Unigene0000127	Unigene0000767	Unigene0008879	Unigene0025411	Unigene0029799	0.000842105	0.00480526	0.175246	0.0159	0.0914
ORTHOMCL6845	Unigene0038264	Unigene0008561	Unigene0002091	Unigene0003541	Unigene0041279	Unigene0037705	Unigene0003946	Unigene0018260	Unigene0042182	Unigene0008180	Unigene0037445	0.00842105	0.0480316	0.175323	0.16	0.9126
ORTHOMCL6057	Unigene0019583	Unigene0029311	Unigene0019844	Unigene0023444	Unigene0014324	Unigene0030339	Unigene0001492	Unigene0011201	Unigene0016318	Unigene0011266	Unigene0029931	0.00471053	0.0268579	0.175387	0.0894	0.5102
ORTHOMCL10838	Unigene0038999	Unigene0041941	Unigene0039426	Unigene0034396	Unigene0043287	Unigene0036152	Unigene0045065	Unigene0044294	Unigene0018849	Unigene0044417	Unigene0039628	0.00562105	0.0320421	0.175427	0.107	0.609
ORTHOMCL9417	Unigene0018884	Unigene0041485	Unigene0018060	Unigene0039786	Unigene0043627	Unigene0018173	Unigene0045303	Unigene0005772	Unigene0008606	Unigene0045004	Unigene0037927	0.00195789	0.0111526	0.175555	0.0373	0.212
ORTHOMCL5009	Unigene0000329	Unigene0040436	Unigene0028525	Unigene0031884	Unigene0041370	Unigene0021957	Unigene0022042	Unigene0024732	Unigene0032727	Unigene0012448	Unigene0027528	0.00187368	0.0106684	0.175629	0.0355	0.2027
ORTHOMCL6457	Unigene0040987	Unigene0036775	Unigene0042330	Unigene0033020	Unigene0043292	Unigene0046936	Unigene0042402	Unigene0001788	Unigene0041158	Unigene0034258	Unigene0034554	0.0028	0.0159368	0.175694	0.0531	0.3027
ORTHOMCL7459	Unigene0041447	Unigene0002850	Unigene0043040	Unigene0030113	Unigene0045460	Unigene0028909	Unigene0003333	Unigene0023360	Unigene0032115	Unigene0006969	Unigene0002655	0.00267895	0.0152474	0.175699	0.0509	0.2897
ORTHOMCL7384	Unigene0029905	Unigene0035363	Unigene0004606	Unigene0008268	Unigene0026354	Unigene0006578	Unigene0021364	Unigene0023049	Unigene0011936	Unigene0010019	Unigene0002581	0.00144737	0.00823684	0.175719	0.0274	0.1565
ORTHOMCL8359	Unigene0043831	Unigene0033632	Unigene0043092	Unigene0013907	Unigene0006925	Unigene0017447	Unigene0003648	Unigene0009686	Unigene0012078	Unigene0029062	Unigene0037070	0.00360526	0.0205158	0.175731	0.0686	0.3899
ORTHOMCL7363	Unigene0002560	Unigene0022940	Unigene0004039	Unigene0037291	Unigene0044052	Unigene0041521	Unigene0026127	Unigene0030424	Unigene0029014	Unigene0007131	Unigene0011779	0.00293684	0.0166947	0.175914	0.0558	0.3172
ORTHOMCL4867	Unigene0001810	Unigene0026853	Unigene0011869	Unigene0034441	Unigene0044141	Unigene0022418	Unigene0001317	Unigene0043627	Unigene0011505	Unigene0000230	Unigene0021928	0.00246842	0.0140316	0.175919	0.0469	0.2668
ORTHOMCL10734	Unigene0041563	Unigene0016646	Unigene0033548	Unigene0029285	Unigene0022028	Unigene0021448	Unigene0016140	Unigene0046557	Unigene0016515	Unigene0046662	Unigene0038966	0.00107368	0.0061	0.176014	0.0204	0.1159
ORTHOMCL5197	Unigene0023134	Unigene0001009	Unigene0038502	Unigene0037259	Unigene0000487	Unigene0004968	Unigene0005025	Unigene0004562	Unigene0035995	Unigene0043926	Unigene0003209	0.00190526	0.0108211	0.17607	0.0363	0.2056
ORTHOMCL8273	Unigene0003536	Unigene0035162	Unigene0014305	Unigene0040423	Unigene0046138	Unigene0042566	Unigene0047046	Unigene0033979	Unigene0040763	Unigene0047758	Unigene0037642	0.00163684	0.00929474	0.176104	0.0311	0.1768
ORTHOMCL5178	Unigene0001593	Unigene0034896	Unigene0019445	Unigene0021979	Unigene0033230	Unigene0018139	Unigene0005211	Unigene0000470	Unigene0035511	Unigene0019830	Unigene0033231	0.0032	0.0181684	0.17613	0.0607	0.3451
ORTHOMCL6395	Unigene0030763	Unigene0004773	Unigene0040810	Unigene0001746	Unigene0034667	Unigene0035865	Unigene0020262	Unigene0006446	Unigene0007318	Unigene0046388	Unigene0015814	0.00381053	0.0216316	0.176156	0.0724	0.4111
ORTHOMCL9298	Unigene0034164	Unigene0022624	Unigene0027587	Unigene0005403	Unigene0046196	Unigene0043550	Unigene0012415	Unigene0047619	Unigene0017662	Unigene0017559	Unigene0026345	0.00143158	0.00812632	0.176166	0.0273	0.1542
ORTHOMCL5108	Unigene0040020	Unigene0004274	Unigene0040643	Unigene0000416	Unigene0046985	Unigene0013298	Unigene0045778	Unigene0043441	Unigene0000566	Unigene0000964	Unigene0036713	0.00211579	0.012	0.176316	0.0401	0.2281
ORTHOMCL4563	Unigene0000446	Unigene0000075	Unigene0031356	Unigene0003063	Unigene0040585	Unigene0005191	Unigene0044456	Unigene0040481	Unigene0011707	Unigene0029636	Unigene0034380	0.00502105	0.0284737	0.17634	0.0952	0.5409
ORTHOMCL7504	Unigene0036270	Unigene0028440	Unigene0032242	Unigene0030176	Unigene0003751	Unigene0002704	Unigene0035539	Unigene0036951	Unigene0006649	Unigene0033683	Unigene0026375	0.00146316	0.00829474	0.176396	0.0278	0.1577
ORTHOMCL5636	Unigene0028129	Unigene0001136	Unigene0029705	Unigene0032804	Unigene0010907	Unigene0042671	Unigene0030982	Unigene0007661	Unigene0036343	Unigene0031539	Unigene0022051	0.00107895	0.00611579	0.17642	0.0205	0.1162
ORTHOMCL10111	Unigene0032327	Unigene0020506	Unigene0021127	Unigene0032341	Unigene0026990	Unigene0010003	Unigene0008845	Unigene0030286	Unigene0039700	Unigene0024715	Unigene0011761	0.00165263	0.00935263	0.176702	0.0313	0.1779
ORTHOMCL4531	Unigene0037866	Unigene0019048	Unigene0004012	Unigene0012700	Unigene0006516	Unigene0044563	Unigene0000063	Unigene0000822	Unigene0041336	Unigene0011867	Unigene0016816	0.00268421	0.0151789	0.176838	0.0512	0.2883
ORTHOMCL9781	Unigene0042534	Unigene0033945	Unigene0007100	Unigene0032529	Unigene0025446	Unigene0019225	Unigene0014712	Unigene0044493	Unigene0037016	Unigene0021874	Unigene0030437	0.00321579	0.0181632	0.17705	0.061	0.3452
ORTHOMCL9627	Unigene0042001	Unigene0007506	Unigene0036621	Unigene0034917	Unigene0026556	Unigene0026069	Unigene0030880	Unigene0025478	Unigene0006464	Unigene0027968	Unigene0029939	0.00232632	0.0131263	0.177225	0.0442	0.2494
ORTHOMCL4951	Unigene0019241	Unigene0040457	Unigene0022202	Unigene0033765	Unigene0013152	Unigene0014377	Unigene0014365	Unigene0006090	Unigene0000284	Unigene0013406	Unigene0030301	0.00214737	0.0121158	0.177237	0.0409	0.2304
ORTHOMCL7077	Unigene0017771	Unigene0006813	Unigene0043023	Unigene0009822	Unigene0029574	Unigene0008253	Unigene0026405	Unigene0040997	Unigene0002285	Unigene0028149	Unigene0030261	0.00135789	0.00765789	0.17732	0.0257	0.1456
ORTHOMCL9956	Unigene0022231	Unigene0009079	Unigene0034694	Unigene0032753	Unigene0042313	Unigene0037617	Unigene0042763	Unigene0030690	Unigene0022072	Unigene0034513	Unigene0007933	0.00261579	0.0147368	0.1775	0.0496	0.2799
ORTHOMCL7197	Unigene0012429	Unigene0018150	Unigene0010095	Unigene0009317	Unigene0042221	Unigene0040365	Unigene0045341	Unigene0042432	Unigene0020958	Unigene0028580	Unigene0002404	0.00105789	0.00595789	0.177562	0.02	0.1131
ORTHOMCL7530	Unigene0002726	Unigene0005086	Unigene0005694	Unigene0004693	Unigene0007870	Unigene0045665	Unigene0026467	Unigene0008818	Unigene0002997	Unigene0008884	Unigene0014147	0.00204211	0.0115	0.177574	0.0387	0.2187
ORTHOMCL4605	Unigene0008677	Unigene0033715	Unigene0025819	Unigene0016106	Unigene0020361	Unigene0019034	Unigene0000092	Unigene0002034	Unigene0032433	Unigene0044238	Unigene0029296	0.00118421	0.00666842	0.177585	0.0224	0.1267
ORTHOMCL7572	Unigene0027593	Unigene0002757	Unigene0022288	Unigene0020084	Unigene0019537	Unigene0013866	Unigene0029424	Unigene0047355	Unigene0031098	Unigene0011602	Unigene0030605	0.00167368	0.00941579	0.177753	0.032	0.1789
ORTHOMCL8296	Unigene0039203	Unigene0040969	Unigene0011326	Unigene0038814	Unigene0027819	Unigene0029675	Unigene0006784	Unigene0042499	Unigene0035319	Unigene0003564	Unigene0039598	0.00304211	0.0171105	0.177791	0.0578	0.3251
ORTHOMCL8641	Unigene0032251	Unigene0020333	Unigene0025233	Unigene0013549	Unigene0004053	Unigene0025344	Unigene0013823	Unigene0007329	Unigene0023368	Unigene0015139	Unigene0008819	0.00373684	0.0210158	0.177811	0.071	0.3995
ORTHOMCL9189	Unigene0008419	Unigene0015332	Unigene0005135	Unigene0020282	Unigene0047729	Unigene0021676	Unigene0011149	Unigene0045161	Unigene0009031	Unigene0017964	Unigene0018646	0.00476316	0.0267684	0.177939	0.0904	0.5088
ORTHOMCL6649	Unigene0010740	Unigene0002961	Unigene0036388	Unigene0033657	Unigene0043315	Unigene0001946	Unigene0045567	Unigene0037751	Unigene0011658	Unigene0010756	Unigene0033705	0.00156316	0.00878421	0.177951	0.0296	0.1669
ORTHOMCL5515	Unigene0000959	Unigene0019719	Unigene0023161	Unigene0004622	Unigene0028399	Unigene0006480	Unigene0006102	Unigene0002274	Unigene0041542	Unigene0025884	Unigene0028656	0.00183684	0.0103211	0.17797	0.0347	0.1961
ORTHOMCL8035	Unigene0043574	Unigene0041423	Unigene0036132	Unigene0011495	Unigene0045765	Unigene0028280	Unigene0003262	Unigene0021798	Unigene0030612	Unigene0038121	Unigene0029469	0.119737	0.672684	0.177999	2.2749	12.7809
ORTHOMCL10811	Unigene0044746	Unigene0034035	Unigene0027878	Unigene0027292	Unigene0025966	Unigene0035489	Unigene0036922	Unigene0042958	Unigene0037770	Unigene0022715	Unigene0018147	0.00201053	0.0112789	0.178255	0.0384	0.2143
ORTHOMCL4488	Unigene0037076	Unigene0000048	Unigene0041898	Unigene0022440	Unigene0008049	Unigene0043389	Unigene0041593	Unigene0047377	Unigene0033528	Unigene0043940	Unigene0038957	0.00185263	0.0103895	0.178318	0.0353	0.1976
ORTHOMCL6812	Unigene0012707	Unigene0015084	Unigene0005510	Unigene0035788	Unigene0016217	Unigene0002068	Unigene0020434	Unigene0029254	Unigene0034304	Unigene0031989	Unigene0035455	0.00211053	0.0118316	0.178381	0.0404	0.2248
ORTHOMCL5259	Unigene0035295	Unigene0038465	Unigene0001191	Unigene0009841	Unigene0044843	Unigene0045247	Unigene0042020	Unigene0000540	Unigene0034983	Unigene0029770	Unigene0036463	0.00418421	0.0234526	0.178411	0.0795	0.4455
ORTHOMCL5988	Unigene0043542	Unigene0017613	Unigene0002707	Unigene0004647	Unigene0004474	Unigene0001436	Unigene0005504	Unigene0021249	Unigene0004967	Unigene0015794	Unigene0039481	0.00102105	0.00572105	0.178473	0.0194	0.1086
ORTHOMCL9738	Unigene0008787	Unigene0017216	Unigene0030324	Unigene0013066	Unigene0042935	Unigene0043030	Unigene0006891	Unigene0047216	Unigene0041139	Unigene0040178	Unigene0032255	0.000947368	0.00530526	0.178571	0.018	0.1008
ORTHOMCL9700	Unigene0020390	Unigene0032794	Unigene0040366	Unigene0038664	Unigene0031136	Unigene0035280	Unigene0046053	Unigene0028294	Unigene0041091	Unigene0049395	Unigene0006747	0.00133684	0.00748421	0.178622	0.0253	0.1422
ORTHOMCL8194	Unigene0043695	Unigene0003443	Unigene0017400	Unigene0039685	Unigene0046746	Unigene0045422	Unigene0043458	Unigene0005822	Unigene0039515	Unigene0031185	Unigene0010735	0.00234737	0.0131368	0.178686	0.0444	0.2498
ORTHOMCL9213	Unigene0008279	Unigene0030710	Unigene0021867	Unigene0041081	Unigene0015413	Unigene0005185	Unigene0017398	Unigene0020412	Unigene0033406	Unigene0047314	Unigene0038882	0.00161053	0.00901053	0.178738	0.0306	0.1712
ORTHOMCL5808	Unigene0004258	Unigene0025101	Unigene0014698	Unigene0033013	Unigene0043520	Unigene0021906	Unigene0016718	Unigene0034219	Unigene0013726	Unigene0002668	Unigene0001290	0.000842105	0.00471053	0.178771	0.0161	0.0896
ORTHOMCL4995	Unigene0024715	Unigene0041989	Unigene0026780	Unigene0001732	Unigene0000316	Unigene0040059	Unigene0046435	Unigene0032911	Unigene0004725	Unigene0004645	Unigene0035836	0.00198947	0.0111263	0.178808	0.0378	0.2113
ORTHOMCL8217	Unigene0046158	Unigene0042033	Unigene0012593	Unigene0019076	Unigene0007827	Unigene0018745	Unigene0010509	Unigene0012637	Unigene0037694	Unigene0003472	Unigene0036406	0.00112105	0.00626842	0.178841	0.0213	0.1192
ORTHOMCL7945	Unigene0003153	Unigene0027509	Unigene0043066	Unigene0027202	Unigene0044723	Unigene0024991	Unigene0044889	Unigene0037790	Unigene0036189	Unigene0031315	Unigene0009621	0.00166316	0.00928947	0.179037	0.0315	0.1766
ORTHOMCL10776	Unigene0039917	Unigene0017095	Unigene0035013	Unigene0036297	Unigene0045536	Unigene0020571	Unigene0042052	Unigene0042402	Unigene0033168	Unigene0047267	Unigene0018678	0.00297368	0.0166053	0.179081	0.0563	0.3154
ORTHOMCL4362	Unigene0000420	Unigene0026647	Unigene0001198	Unigene0000864	Unigene0034382	Unigene0021138	Unigene0000144	Unigene0000442	Unigene0036876	Unigene0042820	Unigene0000001	0.00241579	0.0134895	0.179087	0.0459	0.2562
ORTHOMCL7267	Unigene0046097	Unigene0031016	Unigene0002476	Unigene0007702	Unigene0044234	Unigene0011444	Unigene0020173	Unigene0022918	Unigene0012619	Unigene0049084	Unigene0038285	0.000842105	0.0047	0.179171	0.016	0.0894
ORTHOMCL5156	Unigene0001006	Unigene0000451	Unigene0003490	Unigene0035795	Unigene0044477	Unigene0027676	Unigene0028355	Unigene0044618	Unigene0004358	Unigene0010597	Unigene0005993	0.00183158	0.0102158	0.179289	0.0348	0.1941
ORTHOMCL9887	Unigene0040036	Unigene0034363	Unigene0028615	Unigene0025756	Unigene0045280	Unigene0039681	Unigene0039748	Unigene0007572	Unigene0018508	Unigene0030624	Unigene0023781	0.000905263	0.00504737	0.179353	0.0173	0.0959
ORTHOMCL6322	Unigene0045862	Unigene0030678	Unigene0017848	Unigene0006761	Unigene0001686	Unigene0045587	Unigene0046098	Unigene0036852	Unigene0040039	Unigene0010600	Unigene0036649	0.00266842	0.0148737	0.179406	0.0506	0.2826
ORTHOMCL9460	Unigene0026082	Unigene0009029	Unigene0006287	Unigene0024955	Unigene0008628	Unigene0012980	Unigene0031011	Unigene0013767	Unigene0019776	Unigene0033799	Unigene0005917	0.00488421	0.0272158	0.179462	0.0928	0.5172
ORTHOMCL10794	Unigene0041530	Unigene0035494	Unigene0022594	Unigene0021458	Unigene0035479	Unigene0017858	Unigene0027704	Unigene0047542	Unigene0040246	Unigene0018363	Unigene0028781	0.00315789	0.0175895	0.179533	0.0601	0.3344
ORTHOMCL5224	Unigene0039580	Unigene0041640	Unigene0030621	Unigene0000849	Unigene0047797	Unigene0025017	Unigene0000995	Unigene0000510	Unigene0026256	Unigene0039694	Unigene0000913	0.00272105	0.0151526	0.179576	0.0519	0.2882
ORTHOMCL6312	Unigene0042655	Unigene0032850	Unigene0001855	Unigene0015717	Unigene0001680	Unigene0025829	Unigene0043233	Unigene0026180	Unigene0041721	Unigene0021614	Unigene0019373	0.00281053	0.0156474	0.179617	0.0535	0.2973
ORTHOMCL6126	Unigene0027641	Unigene0005157	Unigene0012815	Unigene0008617	Unigene0028395	Unigene0006561	Unigene0046286	Unigene0018435	Unigene0020090	Unigene0009005	Unigene0001538	0.000715789	0.00398421	0.179657	0.0136	0.0758
ORTHOMCL6935	Unigene0002168	Unigene0037747	Unigene0006498	Unigene0040016	Unigene0002401	Unigene0025913	Unigene0006056	Unigene0043533	Unigene0012762	Unigene0016410	Unigene0038843	0.00231053	0.0128579	0.179697	0.0439	0.2445
ORTHOMCL8767	Unigene0019986	Unigene0020355	Unigene0019909	Unigene0017705	Unigene0028172	Unigene0004291	Unigene0018848	Unigene0046429	Unigene0026284	Unigene0005889	Unigene0006302	0.000821053	0.00456316	0.179931	0.0156	0.0867
ORTHOMCL8401	Unigene0003700	Unigene0020972	Unigene0014329	Unigene0035164	Unigene0028171	Unigene0040480	Unigene0041566	Unigene0043705	Unigene0033202	Unigene0012955	Unigene0038539	0.00398947	0.0221421	0.180176	0.0759	0.4208
ORTHOMCL5995	Unigene0003709	Unigene0015077	Unigene0033418	Unigene0009347	Unigene0029353	Unigene0039705	Unigene0001440	Unigene0008489	Unigene0012160	Unigene0014480	Unigene0013882	0.00233158	0.0129316	0.180301	0.0443	0.2458
ORTHOMCL6175	Unigene0005028	Unigene0022808	Unigene0034372	Unigene0001578	Unigene0001931	Unigene0027282	Unigene0002831	Unigene0046047	Unigene0023345	Unigene0028350	Unigene0029403	0.00272632	0.0151053	0.180488	0.0518	0.287
ORTHOMCL10731	Unigene0039870	Unigene0033064	Unigene0034613	Unigene0036498	Unigene0028317	Unigene0040680	Unigene0045053	Unigene0047276	Unigene0033267	Unigene0045582	Unigene0016094	0.00185263	0.0102526	0.180698	0.0353	0.1948
ORTHOMCL9920	Unigene0041631	Unigene0031917	Unigene0026615	Unigene0026406	Unigene0007726	Unigene0033481	Unigene0016674	Unigene0035620	Unigene0026250	Unigene0035576	Unigene0025211	0.00183684	0.0101632	0.180735	0.0349	0.1932
ORTHOMCL8806	Unigene0024735	Unigene0026411	Unigene0024824	Unigene0029238	Unigene0015465	Unigene0009225	Unigene0004373	Unigene0032439	Unigene0029330	Unigene0042608	Unigene0013262	0.00218421	0.0120842	0.180749	0.0415	0.2296
ORTHOMCL6242	Unigene0004906	Unigene0004415	Unigene0036805	Unigene0002928	Unigene0002242	Unigene0043185	Unigene0043811	Unigene0005722	Unigene0001632	Unigene0049306	Unigene0008432	0.00149474	0.00826842	0.180777	0.0283	0.1573
ORTHOMCL6692	Unigene0006626	Unigene0025314	Unigene0040735	Unigene0011077	Unigene0001977	Unigene0043923	Unigene0040525	Unigene0022050	Unigene0013738	Unigene0034297	Unigene0034340	0.00251053	0.0138842	0.180819	0.0477	0.264
ORTHOMCL5222	Unigene0000509	Unigene0033607	Unigene0004491	Unigene0037985	Unigene0000878	Unigene0035028	Unigene0033622	Unigene0000567	Unigene0016019	Unigene0003902	Unigene0038080	0.00287368	0.0158895	0.180855	0.0546	0.302
ORTHOMCL4974	Unigene0044027	Unigene0000473	Unigene0033885	Unigene0037845	Unigene0027494	Unigene0000302	Unigene0043123	Unigene0035286	Unigene0039681	Unigene0026510	Unigene0025912	0.00354211	0.0195632	0.18106	0.0673	0.3718
ORTHOMCL5413	Unigene0041727	Unigene0021204	Unigene0033685	Unigene0011595	Unigene0028845	Unigene0026937	Unigene0041669	Unigene0000783	Unigene0041617	Unigene0029350	Unigene0017217	0.00366316	0.0202053	0.181297	0.0696	0.3839
ORTHOMCL6939	Unigene0043317	Unigene0035639	Unigene0022323	Unigene0010015	Unigene0004046	Unigene0007529	Unigene0003068	Unigene0002171	Unigene0036540	Unigene0010296	Unigene0012500	0.00144737	0.00797895	0.181398	0.0276	0.1516
ORTHOMCL5403	Unigene0004339	Unigene0042111	Unigene0002730	Unigene0033253	Unigene0044777	Unigene0045152	Unigene0006255	Unigene0006721	Unigene0000767	Unigene0027859	Unigene0039165	0.00120526	0.00664211	0.181458	0.023	0.1263
ORTHOMCL5689	Unigene0042352	Unigene0025866	Unigene0041407	Unigene0017766	Unigene0005796	Unigene0004932	Unigene0036674	Unigene0045056	Unigene0014576	Unigene0001186	Unigene0038741	0.00153684	0.00846842	0.181479	0.0291	0.1608
ORTHOMCL5264	Unigene0011885	Unigene0009941	Unigene0041556	Unigene0035018	Unigene0000544	Unigene0043252	Unigene0043367	Unigene0047364	Unigene0035020	Unigene0046124	Unigene0022195	0.0042	0.0231421	0.181487	0.0797	0.4396
ORTHOMCL6697	Unigene0030838	Unigene0037756	Unigene0008441	Unigene0031749	Unigene0046433	Unigene0001980	Unigene0047770	Unigene0046620	Unigene0034181	Unigene0048121	Unigene0039222	0.00325789	0.0179474	0.181525	0.062	0.3411
ORTHOMCL9258	Unigene0025778	Unigene0028680	Unigene0023253	Unigene0033242	Unigene0043236	Unigene0030143	Unigene0046789	Unigene0005298	Unigene0010147	Unigene0038917	Unigene0035243	0.000889474	0.0049	0.181525	0.0169	0.0931
ORTHOMCL9018	Unigene0008435	Unigene0004782	Unigene0018550	Unigene0038494	Unigene0042938	Unigene0023397	Unigene0025045	Unigene0046732	Unigene0032430	Unigene0032806	Unigene0031654	0.0765053	0.421379	0.181559	1.4536	8.0063
ORTHOMCL9576	Unigene0013090	Unigene0037384	Unigene0006335	Unigene0018851	Unigene0006452	Unigene0025818	Unigene0015501	Unigene0011803	Unigene0014140	Unigene0049205	Unigene0019456	0.00168421	0.00927368	0.181612	0.0321	0.1762
ORTHOMCL6028	Unigene0044537	Unigene0007450	Unigene0027691	Unigene0036258	Unigene0043597	Unigene0043536	Unigene0001548	Unigene0007484	Unigene0001473	Unigene0039437	Unigene0028111	0.0590421	0.325095	0.181615	1.1216	6.1767
ORTHOMCL5797	Unigene0045009	Unigene0012001	Unigene0025943	Unigene0001279	Unigene0033406	Unigene0045467	Unigene0002278	Unigene0024623	Unigene0005231	Unigene0023728	Unigene0039091	0.00265789	0.0146316	0.181655	0.0503	0.278
ORTHOMCL5896	Unigene0021266	Unigene0023736	Unigene0001382	Unigene0036678	Unigene0022978	Unigene0025120	Unigene0024790	Unigene0045363	Unigene0031066	Unigene0024939	Unigene0028114	0.00112632	0.0062	0.181664	0.0215	0.1178
ORTHOMCL8432	Unigene0032563	Unigene0039499	Unigene0028833	Unigene0003751	Unigene0045999	Unigene0010760	Unigene0033810	Unigene0012134	Unigene0016423	Unigene0042541	Unigene0008356	0.00207895	0.0114316	0.18186	0.0395	0.2172
ORTHOMCL4993	Unigene0029892	Unigene0000906	Unigene0010785	Unigene0037957	Unigene0000473	Unigene0025547	Unigene0028024	Unigene0035142	Unigene0000387	Unigene0000316	Unigene0019206	0.00383158	0.0210526	0.182	0.0728	0.4
ORTHOMCL7770	Unigene0031645	Unigene0002983	Unigene0022935	Unigene0028168	Unigene0036458	Unigene0032615	Unigene0034174	Unigene0010062	Unigene0007626	Unigene0042578	Unigene0026384	0.000631579	0.00346842	0.182094	0.012	0.0659
ORTHOMCL8853	Unigene0028509	Unigene0023440	Unigene0035233	Unigene0018645	Unigene0026348	Unigene0014541	Unigene0013688	Unigene0010922	Unigene0036991	Unigene0031523	Unigene0004467	0.00304211	0.0167	0.182162	0.0578	0.3173
ORTHOMCL6251	Unigene0044463	Unigene0021000	Unigene0001638	Unigene0036979	Unigene0045358	Unigene0005714	Unigene0044428	Unigene0015105	Unigene0031239	Unigene0008296	Unigene0004301	0.00112105	0.00615263	0.182207	0.0213	0.1169
ORTHOMCL4615	Unigene0017411	Unigene0006616	Unigene0000096	Unigene0018519	Unigene0015547	Unigene0012736	Unigene0000306	Unigene0000524	Unigene0038846	Unigene0044495	Unigene0012256	0.00541579	0.0297158	0.182253	0.103	0.5646
ORTHOMCL5839	Unigene0040141	Unigene0015353	Unigene0014007	Unigene0029902	Unigene0030059	Unigene0027417	Unigene0003230	Unigene0041342	Unigene0036255	Unigene0030987	Unigene0001332	0.00198421	0.0108842	0.182302	0.0377	0.2066
ORTHOMCL4678	Unigene0015412	Unigene0041091	Unigene0000126	Unigene0039784	Unigene0015242	Unigene0005348	Unigene0011790	Unigene0003586	Unigene0035177	Unigene0027122	Unigene0011606	0.0061	0.0334579	0.182319	0.116	0.6357
ORTHOMCL4957	Unigene0027942	Unigene0037989	Unigene0017550	Unigene0040858	Unigene0023383	Unigene0027083	Unigene0029739	Unigene0000563	Unigene0034457	Unigene0000289	Unigene0006876	0.00254737	0.0139684	0.182366	0.0484	0.2655
ORTHOMCL6814	Unigene0043045	Unigene0008734	Unigene0038049	Unigene0023753	Unigene0032249	Unigene0043552	Unigene0002069	Unigene0046205	Unigene0011572	Unigene0042000	Unigene0030564	0.00110526	0.00605789	0.18245	0.0211	0.115
ORTHOMCL10616	Unigene0027714	Unigene0036668	Unigene0022492	Unigene0021526	Unigene0014148	Unigene0031969	Unigene0015266	Unigene0024737	Unigene0029621	Unigene0021323	Unigene0032131	0.00151053	0.00827368	0.18257	0.0286	0.1571
ORTHOMCL7032	Unigene0025588	Unigene0021453	Unigene0040186	Unigene0039363	Unigene0004060	Unigene0013172	Unigene0002251	Unigene0036998	Unigene0026743	Unigene0004885	Unigene0034019	0.00238947	0.0130789	0.182696	0.0455	0.2485
ORTHOMCL7775	Unigene0045197	Unigene0002987	Unigene0009945	Unigene0020793	Unigene0045567	Unigene0041700	Unigene0031608	Unigene0012389	Unigene0031547	Unigene0003730	Unigene0036669	0.000868421	0.00475263	0.182724	0.0165	0.0903
ORTHOMCL9414	Unigene0044104	Unigene0005757	Unigene0006414	Unigene0034253	Unigene0020598	Unigene0032731	Unigene0042143	Unigene0011845	Unigene0014897	Unigene0018731	Unigene0025601	0.00242105	0.0132474	0.182757	0.0461	0.2517
ORTHOMCL10033	Unigene0039954	Unigene0035840	Unigene0018908	Unigene0013381	Unigene0015744	Unigene0019583	Unigene0015299	Unigene0041758	Unigene0027668	Unigene0024152	Unigene0008322	0.00169474	0.00926842	0.182851	0.0323	0.1762
ORTHOMCL7942	Unigene0009213	Unigene0032854	Unigene0016077	Unigene0003148	Unigene0012755	Unigene0026836	Unigene0015205	Unigene0011702	Unigene0031615	Unigene0028660	Unigene0008289	0.00331053	0.0181	0.182902	0.0629	0.3441
ORTHOMCL6973	Unigene0037325	Unigene0028106	Unigene0033563	Unigene0004590	Unigene0019890	Unigene0025360	Unigene0012849	Unigene0031619	Unigene0031691	Unigene0015509	Unigene0002199	0.00303684	0.0166	0.182942	0.0574	0.3156
ORTHOMCL4747	Unigene0045102	Unigene0000160	Unigene0036358	Unigene0036061	Unigene0045327	Unigene0042393	Unigene0045702	Unigene0046289	Unigene0014144	Unigene0044230	Unigene0036453	0.000984211	0.00537895	0.182975	0.0189	0.1022
ORTHOMCL6901	Unigene0010737	Unigene0024333	Unigene0019980	Unigene0029182	Unigene0002142	Unigene0041443	Unigene0033786	Unigene0041654	Unigene0032755	Unigene0014668	Unigene0029663	0.00274737	0.0150053	0.183094	0.0521	0.2852
ORTHOMCL10375	Unigene0014478	Unigene0017573	Unigene0029993	Unigene0020377	Unigene0036812	Unigene0034734	Unigene0037827	Unigene0024074	Unigene0011114	Unigene0020568	Unigene0016854	0.00125263	0.00683684	0.183218	0.0237	0.13
ORTHOMCL6962	Unigene0045409	Unigene0035445	Unigene0018554	Unigene0040840	Unigene0003313	Unigene0008048	Unigene0044066	Unigene0002869	Unigene0002188	Unigene0007578	Unigene0036012	0.00115263	0.00628421	0.183417	0.022	0.1194
ORTHOMCL7817	Unigene0026689	Unigene0031165	Unigene0031293	Unigene0030294	Unigene0003028	Unigene0018582	Unigene0040203	Unigene0030847	Unigene0028510	Unigene0042603	Unigene0026999	0.000968421	0.00527895	0.18345	0.0184	0.1003
ORTHOMCL7556	Unigene0004337	Unigene0039831	Unigene0003889	Unigene0002747	Unigene0005969	Unigene0004840	Unigene0047383	Unigene0027124	Unigene0004397	Unigene0006725	Unigene0012019	0.00143684	0.00783158	0.183468	0.0273	0.149
ORTHOMCL6884	Unigene0003615	Unigene0038607	Unigene0013354	Unigene0014953	Unigene0018588	Unigene0036092	Unigene0002124	Unigene0010752	Unigene0033700	Unigene0011908	Unigene0037379	0.00241579	0.0131579	0.1836	0.046	0.25
ORTHOMCL8659	Unigene0004086	Unigene0031877	Unigene0027953	Unigene0025265	Unigene0035545	Unigene0035518	Unigene0017623	Unigene0038705	Unigene0033011	Unigene0022816	Unigene0040070	0.00118421	0.00644737	0.183673	0.0226	0.1225
ORTHOMCL4421	Unigene0000604	Unigene0015485	Unigene0033738	Unigene0000332	Unigene0001017	Unigene0024533	Unigene0000978	Unigene0000555	Unigene0000073	Unigene0000022	Unigene0000516	0.00172632	0.00939474	0.183754	0.0327	0.1784
ORTHOMCL6448	Unigene0040309	Unigene0002783	Unigene0008261	Unigene0014799	Unigene0041702	Unigene0040143	Unigene0042100	Unigene0041268	Unigene0008166	Unigene0004223	Unigene0001782	0.00119474	0.0065	0.183806	0.0227	0.1235
ORTHOMCL10243	Unigene0019816	Unigene0014238	Unigene0013180	Unigene0018845	Unigene0012862	Unigene0041153	Unigene0023455	Unigene0022884	Unigene0013974	Unigene0009980	Unigene0033832	0.000984211	0.00535263	0.183874	0.0187	0.1018
ORTHOMCL6698	Unigene0030725	Unigene0042015	Unigene0015922	Unigene0022543	Unigene0011121	Unigene0023817	Unigene0012397	Unigene0013980	Unigene0037950	Unigene0001981	Unigene0006376	0.000831579	0.00452105	0.183935	0.0157	0.086
ORTHOMCL10203	Unigene0038505	Unigene0016070	Unigene0037238	Unigene0017869	Unigene0040844	Unigene0025432	Unigene0044254	Unigene0018664	Unigene0017265	Unigene0047394	Unigene0009651	0.00166316	0.00904211	0.183935	0.0316	0.1719
ORTHOMCL5904	Unigene0024720	Unigene0004046	Unigene0001387	Unigene0014031	Unigene0024768	Unigene0007434	Unigene0020604	Unigene0006926	Unigene0002186	Unigene0027041	Unigene0011991	0.00123158	0.00668947	0.184107	0.0233	0.1271
ORTHOMCL10275	Unigene0038995	Unigene0033913	Unigene0018162	Unigene0032474	Unigene0010950	Unigene0028338	Unigene0027042	Unigene0030019	Unigene0040516	Unigene0039728	Unigene0010238	0.00148947	0.00808947	0.184125	0.0283	0.1536
ORTHOMCL6512	Unigene0019960	Unigene0005187	Unigene0010371	Unigene0038593	Unigene0017258	Unigene0001828	Unigene0004743	Unigene0043174	Unigene0027637	Unigene0046171	Unigene0025127	0.000673684	0.00365789	0.184173	0.0127	0.0697
ORTHOMCL5389	Unigene0041703	Unigene0013676	Unigene0042384	Unigene0029798	Unigene0040923	Unigene0000751	Unigene0044318	Unigene0042656	Unigene0000943	Unigene0048594	Unigene0015259	0.00599474	0.0325421	0.184215	0.1139	0.6184
ORTHOMCL7091	Unigene0018052	Unigene0018400	Unigene0006689	Unigene0013378	Unigene0008979	Unigene0040336	Unigene0006790	Unigene0017407	Unigene0002308	Unigene0011863	Unigene0006083	0.00153684	0.00834211	0.184227	0.0292	0.1585
ORTHOMCL9669	Unigene0010383	Unigene0033699	Unigene0022327	Unigene0016252	Unigene0032556	Unigene0027543	Unigene0041567	Unigene0016568	Unigene0037291	Unigene0024102	Unigene0006637	0.000873684	0.00474211	0.18424	0.0166	0.0901
ORTHOMCL10672	Unigene0027724	Unigene0026648	Unigene0014990	Unigene0021897	Unigene0041432	Unigene0036533	Unigene0025354	Unigene0044654	Unigene0033304	Unigene0019579	Unigene0029130	0.00160526	0.00871053	0.18429	0.0304	0.1656
ORTHOMCL8803	Unigene0016197	Unigene0022059	Unigene0019148	Unigene0026824	Unigene0016557	Unigene0026144	Unigene0026994	Unigene0037506	Unigene0004369	Unigene0022684	Unigene0031643	0.00168947	0.00916316	0.184377	0.0322	0.1741
ORTHOMCL8051	Unigene0027877	Unigene0012835	Unigene0043328	Unigene0011689	Unigene0007116	Unigene0003280	Unigene0019813	Unigene0014273	Unigene0012650	Unigene0046325	Unigene0036701	0.00902632	0.0489421	0.184428	0.1715	0.9297
ORTHOMCL10690	Unigene0039265	Unigene0030313	Unigene0029140	Unigene0029280	Unigene0038625	Unigene0017156	Unigene0040418	Unigene0037855	Unigene0015464	Unigene0042832	Unigene0027231	0.000768421	0.00416316	0.184576	0.0147	0.0791
ORTHOMCL8200	Unigene0013335	Unigene0024968	Unigene0012713	Unigene0036012	Unigene0044643	Unigene0011428	Unigene0043477	Unigene0030392	Unigene0003454	Unigene0030306	Unigene0032082	0.00516842	0.028	0.184586	0.098	0.5321
ORTHOMCL4392	Unigene0001368	Unigene0040082	Unigene0000011	Unigene0032096	Unigene0000973	Unigene0043165	Unigene0045409	Unigene0001128	Unigene0032857	Unigene0045537	Unigene0033251	0.00313158	0.0169474	0.184783	0.0595	0.322
ORTHOMCL7932	Unigene0007219	Unigene0036047	Unigene0038862	Unigene0037602	Unigene0010039	Unigene0044126	Unigene0047594	Unigene0003135	Unigene0018117	Unigene0046575	Unigene0031297	0.00139474	0.00754737	0.184798	0.0265	0.1432
ORTHOMCL10255	Unigene0040454	Unigene0010093	Unigene0032204	Unigene0027068	Unigene0039374	Unigene0037304	Unigene0022369	Unigene0025258	Unigene0036584	Unigene0011896	Unigene0026801	0.00133158	0.00720526	0.184806	0.0253	0.1368
ORTHOMCL8606	Unigene0040826	Unigene0005789	Unigene0007544	Unigene0016747	Unigene0041921	Unigene0007547	Unigene0031155	Unigene0022037	Unigene0004001	Unigene0005883	Unigene0036395	0.00249474	0.0134895	0.18494	0.0474	0.2563
ORTHOMCL8229	Unigene0011281	Unigene0030154	Unigene0032727	Unigene0039838	Unigene0004462	Unigene0018247	Unigene0007459	Unigene0014759	Unigene0017850	Unigene0031656	Unigene0003492	0.00105263	0.00568947	0.185014	0.0202	0.108
ORTHOMCL7584	Unigene0037509	Unigene0036766	Unigene0003337	Unigene0011315	Unigene0003235	Unigene0002768	Unigene0022683	Unigene0040876	Unigene0036545	Unigene0048761	Unigene0007201	0.0036	0.0194579	0.185015	0.068	0.3697
ORTHOMCL6590	Unigene0018262	Unigene0022928	Unigene0001907	Unigene0032792	Unigene0006008	Unigene0041654	Unigene0041488	Unigene0007216	Unigene0017889	Unigene0023012	Unigene0006454	0.00118947	0.00642632	0.185094	0.0227	0.1222
ORTHOMCL10727	Unigene0037097	Unigene0016079	Unigene0022699	Unigene0031692	Unigene0041800	Unigene0031879	Unigene0041336	Unigene0044931	Unigene0016765	Unigene0025318	Unigene0033043	0.000878947	0.00474737	0.185144	0.0166	0.0903
ORTHOMCL4584	Unigene0038725	Unigene0021872	Unigene0037910	Unigene0034021	Unigene0041805	Unigene0046503	Unigene0025412	Unigene0032827	Unigene0000083	Unigene0033491	Unigene0029554	0.00233684	0.0126105	0.185309	0.0442	0.2396
ORTHOMCL6365	Unigene0006800	Unigene0026690	Unigene0032478	Unigene0011851	Unigene0034052	Unigene0021556	Unigene0039235	Unigene0029921	Unigene0011093	Unigene0001723	Unigene0036997	0.000984211	0.00531053	0.185332	0.0187	0.1009
ORTHOMCL10540	Unigene0045826	Unigene0024921	Unigene0036089	Unigene0021469	Unigene0012983	Unigene0025648	Unigene0014332	Unigene0040365	Unigene0036198	Unigene0027567	Unigene0031867	0.00211579	0.0114158	0.185339	0.0404	0.2169
ORTHOMCL5670	Unigene0012708	Unigene0040063	Unigene0001169	Unigene0014635	Unigene0039354	Unigene0044218	Unigene0009051	Unigene0015989	Unigene0039981	Unigene0020449	Unigene0036809	0.00108421	0.00584737	0.185419	0.0206	0.1111
ORTHOMCL9604	Unigene0041851	Unigene0030100	Unigene0018882	Unigene0038960	Unigene0006896	Unigene0042079	Unigene0044614	Unigene0044555	Unigene0006403	Unigene0047192	Unigene0037119	0.000905263	0.00487895	0.185545	0.0171	0.0927
ORTHOMCL7336	Unigene0040476	Unigene0002538	Unigene0035795	Unigene0004788	Unigene0046783	Unigene0042366	Unigene0042982	Unigene0041278	Unigene0042006	Unigene0033345	Unigene0036749	0.00232632	0.0125368	0.185558	0.0442	0.2383
ORTHOMCL9889	Unigene0039465	Unigene0038077	Unigene0025759	Unigene0013022	Unigene0007575	Unigene0026744	Unigene0037805	Unigene0017659	Unigene0025338	Unigene0015473	Unigene0031280	0.00248421	0.0133842	0.185608	0.0474	0.2545
ORTHOMCL5065	Unigene0016929	Unigene0032648	Unigene0027716	Unigene0026058	Unigene0000373	Unigene0014415	Unigene0040103	Unigene0043512	Unigene0032183	Unigene0018548	Unigene0010961	0.00116842	0.00629474	0.185619	0.0221	0.1196
ORTHOMCL4384	Unigene0021265	Unigene0000508	Unigene0000008	Unigene0032905	Unigene0000066	Unigene0016819	Unigene0033471	Unigene0016058	Unigene0000304	Unigene0016276	Unigene0022185	0.00437895	0.0235842	0.185673	0.0836	0.4481
ORTHOMCL10739	Unigene0035284	Unigene0016202	Unigene0039600	Unigene0020720	Unigene0041525	Unigene0029672	Unigene0023804	Unigene0031642	Unigene0024961	Unigene0026451	Unigene0029473	0.00378421	0.0203789	0.185692	0.072	0.3871
ORTHOMCL7502	Unigene0029685	Unigene0029579	Unigene0028987	Unigene0021880	Unigene0024538	Unigene0024777	Unigene0007374	Unigene0007249	Unigene0002702	Unigene0022069	Unigene0024034	0.00212105	0.0114211	0.185714	0.0405	0.2171
ORTHOMCL9453	Unigene0038772	Unigene0036204	Unigene0023192	Unigene0029245	Unigene0032547	Unigene0032874	Unigene0005874	Unigene0028072	Unigene0032232	Unigene0018401	Unigene0017075	0.00158947	0.00855789	0.185732	0.0301	0.1627
ORTHOMCL8466	Unigene0041422	Unigene0038101	Unigene0038907	Unigene0040944	Unigene0041168	Unigene0043818	Unigene0011455	Unigene0003795	Unigene0032198	Unigene0003897	Unigene0038161	0.00262105	0.0141105	0.185752	0.0497	0.2682
ORTHOMCL4472	Unigene0038784	Unigene0010997	Unigene0015389	Unigene0036923	Unigene0025168	Unigene0001040	Unigene0000043	Unigene0040848	Unigene0032153	Unigene0030913	Unigene0000940	0.0106526	0.0573316	0.185807	0.2023	1.0892
ORTHOMCL8289	Unigene0007781	Unigene0040831	Unigene0028054	Unigene0023475	Unigene0022901	Unigene0031752	Unigene0021653	Unigene0035049	Unigene0003554	Unigene0022960	Unigene0016207	0.00150526	0.0081	0.185835	0.0287	0.1539
ORTHOMCL10555	Unigene0022312	Unigene0034321	Unigene0032232	Unigene0027154	Unigene0013214	Unigene0016993	Unigene0048335	Unigene0040423	Unigene0032774	Unigene0024134	Unigene0014383	0.00416316	0.0223789	0.18603	0.0791	0.4254
ORTHOMCL9680	Unigene0034903	Unigene0035076	Unigene0026722	Unigene0025242	Unigene0036572	Unigene0033306	Unigene0018601	Unigene0046887	Unigene0006696	Unigene0041287	Unigene0027158	0.00106842	0.00574211	0.186068	0.0203	0.1091
ORTHOMCL7477	Unigene0045029	Unigene0026237	Unigene0038287	Unigene0039852	Unigene0021470	Unigene0026786	Unigene0044782	Unigene0046794	Unigene0029869	Unigene0007535	Unigene0002675	0.00712632	0.0382895	0.186117	0.1356	0.7273
ORTHOMCL6742	Unigene0002352	Unigene0038825	Unigene0019632	Unigene0039405	Unigene0027410	Unigene0039932	Unigene0041345	Unigene0002018	Unigene0026260	Unigene0049071	Unigene0033164	0.0807526	0.433616	0.186231	1.5342	8.2386
ORTHOMCL10075	Unigene0040793	Unigene0015408	Unigene0023581	Unigene0033390	Unigene0044943	Unigene0038285	Unigene0023337	Unigene0040543	Unigene0021457	Unigene0008583	Unigene0020349	0.00184211	0.00988947	0.186269	0.035	0.1878
ORTHOMCL6999	Unigene0043012	Unigene0003867	Unigene0010794	Unigene0009037	Unigene0038292	Unigene0002221	Unigene0040435	Unigene0043735	Unigene0039834	Unigene0006326	Unigene0011848	0.000810526	0.00434737	0.186441	0.0154	0.0825
ORTHOMCL5599	Unigene0016484	Unigene0005417	Unigene0001097	Unigene0010260	Unigene0017036	Unigene0044864	Unigene0036948	Unigene0015679	Unigene0029484	Unigene0046760	Unigene0015665	0.00138947	0.00744737	0.186572	0.0265	0.1414
ORTHOMCL5495	Unigene0000918	Unigene0011941	Unigene0008197	Unigene0007932	Unigene0040416	Unigene0011867	Unigene0041854	Unigene0027667	Unigene0027326	Unigene0012187	Unigene0004899	0.00125789	0.00674211	0.186573	0.0237	0.1281
ORTHOMCL5816	Unigene0043860	Unigene0012691	Unigene0020535	Unigene0031808	Unigene0012865	Unigene0044290	Unigene0001305	Unigene0042588	Unigene0026148	Unigene0027301	Unigene0012174	0.0023	0.0123263	0.186593	0.0439	0.2342
ORTHOMCL7471	Unigene0038380	Unigene0022722	Unigene0013426	Unigene0009409	Unigene0045694	Unigene0043553	Unigene0002669	Unigene0035310	Unigene0006661	Unigene0018702	Unigene0029884	0.00197895	0.0106053	0.1866	0.0375	0.2015
ORTHOMCL4643	Unigene0004745	Unigene0000109	Unigene0041917	Unigene0001369	Unigene0031364	Unigene0020408	Unigene0005549	Unigene0008131	Unigene0001894	Unigene0028469	Unigene0006378	0.00147368	0.00789474	0.186667	0.0282	0.1501
ORTHOMCL5248	Unigene0020760	Unigene0041425	Unigene0022440	Unigene0035090	Unigene0045533	Unigene0010175	Unigene0000532	Unigene0038832	Unigene0007460	Unigene0003525	Unigene0020958	0.00481579	0.0257789	0.186811	0.0916	0.4899
ORTHOMCL9952	Unigene0008271	Unigene0015614	Unigene0016463	Unigene0015718	Unigene0007923	Unigene0036389	Unigene0009158	Unigene0038025	Unigene0019475	Unigene0010674	Unigene0010052	0.00116316	0.00622632	0.186813	0.0221	0.1183
ORTHOMCL9701	Unigene0039974	Unigene0010878	Unigene0035646	Unigene0039259	Unigene0042218	Unigene0044935	Unigene0041825	Unigene0018102	Unigene0006754	Unigene0040548	Unigene0027908	0.00139474	0.00746316	0.186883	0.0264	0.1417
ORTHOMCL8747	Unigene0019393	Unigene0039896	Unigene0041074	Unigene0022544	Unigene0044456	Unigene0044878	Unigene0047544	Unigene0045477	Unigene0042623	Unigene0004255	Unigene0016177	0.00106842	0.00571579	0.186924	0.0203	0.1088
ORTHOMCL5061	Unigene0046142	Unigene0035300	Unigene0010641	Unigene0006350	Unigene0040556	Unigene0044716	Unigene0044535	Unigene0000370	Unigene0030976	Unigene0029837	Unigene0031194	0.00643684	0.0344263	0.186974	0.1223	0.6542
ORTHOMCL10910	Unigene0026522	Unigene0040194	Unigene0023716	Unigene0021480	Unigene0041259	Unigene0039634	Unigene0031385	Unigene0046486	Unigene0037652	Unigene0026526	Unigene0029896	0.00391579	0.0209421	0.186982	0.0745	0.398
ORTHOMCL4830	Unigene0043361	Unigene0015947	Unigene0040000	Unigene0036825	Unigene0040907	Unigene0000212	Unigene0042469	Unigene0018685	Unigene0036646	Unigene0017471	Unigene0021780	0.00545263	0.0291421	0.187105	0.1035	0.5537
ORTHOMCL8737	Unigene0033605	Unigene0019909	Unigene0005876	Unigene0015687	Unigene0004299	Unigene0016830	Unigene0004234	Unigene0030361	Unigene0027410	Unigene0046530	Unigene0019760	0.000705263	0.00376842	0.187151	0.0133	0.0717
ORTHOMCL7883	Unigene0017812	Unigene0036560	Unigene0038195	Unigene0027093	Unigene0013909	Unigene0006950	Unigene0031556	Unigene0003084	Unigene0009241	Unigene0025982	Unigene0003789	0.00181053	0.00967368	0.18716	0.0345	0.1838
ORTHOMCL9544	Unigene0020108	Unigene0021883	Unigene0009902	Unigene0007187	Unigene0022497	Unigene0006225	Unigene0019045	Unigene0021480	Unigene0008389	Unigene0012542	Unigene0009165	0.0443526	0.236947	0.187183	0.8428	4.502
ORTHOMCL9410	Unigene0007015	Unigene0026887	Unigene0017386	Unigene0005744	Unigene0032633	Unigene0034173	Unigene0025824	Unigene0020083	Unigene0011230	Unigene0012436	Unigene0013704	0.000915789	0.00488947	0.187298	0.0175	0.0929
ORTHOMCL5057	Unigene0001581	Unigene0034319	Unigene0034965	Unigene0040405	Unigene0000365	Unigene0022784	Unigene0020170	Unigene0031136	Unigene0000525	Unigene0000392	Unigene0023268	0.00662632	0.0353632	0.187379	0.1259	0.6719
ORTHOMCL7180	Unigene0006554	Unigene0040469	Unigene0041703	Unigene0034339	Unigene0040927	Unigene0045236	Unigene0047783	Unigene0002392	Unigene0037905	Unigene0045025	Unigene0007136	0.000805263	0.00429474	0.1875	0.0154	0.0817
ORTHOMCL8477	Unigene0024643	Unigene0003808	Unigene0038411	Unigene0026586	Unigene0024458	Unigene0013367	Unigene0028431	Unigene0044042	Unigene0005611	Unigene0020117	Unigene0009437	0.00273684	0.0145737	0.187793	0.0521	0.277
ORTHOMCL6671	Unigene0011898	Unigene0003027	Unigene0014572	Unigene0013990	Unigene0043719	Unigene0015568	Unigene0041960	Unigene0045665	Unigene0001964	Unigene0034691	Unigene0030867	0.0014	0.00745263	0.187853	0.0265	0.1416
ORTHOMCL9159	Unigene0005071	Unigene0025245	Unigene0019922	Unigene0007369	Unigene0009107	Unigene0012039	Unigene0021707	Unigene0008354	Unigene0016670	Unigene0008169	Unigene0030408	0.00133684	0.00711579	0.18787	0.0254	0.1353
ORTHOMCL5064	Unigene0000372	Unigene0020902	Unigene0028835	Unigene0033163	Unigene0039431	Unigene0034204	Unigene0034754	Unigene0005449	Unigene0028279	Unigene0006566	Unigene0024722	0.00155789	0.00828947	0.187937	0.0295	0.1574
ORTHOMCL8871	Unigene0039571	Unigene0041509	Unigene0040566	Unigene0032223	Unigene0045473	Unigene0004493	Unigene0023088	Unigene0024639	Unigene0034475	Unigene0034432	Unigene0033190	0.00326842	0.0173895	0.187954	0.0619	0.3304
ORTHOMCL9721	Unigene0006835	Unigene0014210	Unigene0017685	Unigene0013388	Unigene0027290	Unigene0043440	Unigene0034953	Unigene0035264	Unigene0009914	Unigene0015818	Unigene0013479	0.00126842	0.00674211	0.188134	0.0241	0.1281
ORTHOMCL5400	Unigene0035171	Unigene0016586	Unigene0002331	Unigene0019771	Unigene0042045	Unigene0026438	Unigene0009751	Unigene0000762	Unigene0002658	Unigene0006298	Unigene0039692	0.00185789	0.00987368	0.188166	0.0354	0.1877
ORTHOMCL6248	Unigene0017943	Unigene0040424	Unigene0031084	Unigene0016263	Unigene0041715	Unigene0002376	Unigene0001635	Unigene0044638	Unigene0033418	Unigene0029108	Unigene0007560	0.00155789	0.00827895	0.188175	0.0297	0.1573
ORTHOMCL4727	Unigene0000425	Unigene0018910	Unigene0001072	Unigene0033357	Unigene0043354	Unigene0041923	Unigene0044356	Unigene0002652	Unigene0000152	Unigene0044011	Unigene0029604	0.0041	0.0217789	0.188255	0.078	0.4136
ORTHOMCL8790	Unigene0042529	Unigene0040216	Unigene0037251	Unigene0016388	Unigene0004342	Unigene0038714	Unigene0020279	Unigene0022650	Unigene0008139	Unigene0027212	Unigene0034221	0.00225789	0.0119895	0.188323	0.0428	0.228
ORTHOMCL7104	Unigene0026359	Unigene0002966	Unigene0036516	Unigene0013508	Unigene0002319	Unigene0025093	Unigene0042039	Unigene0028390	Unigene0038004	Unigene0049430	Unigene0028666	0.00201053	0.0106737	0.188363	0.0382	0.2028
ORTHOMCL10529	Unigene0041792	Unigene0028205	Unigene0028806	Unigene0026660	Unigene0012826	Unigene0042310	Unigene0041257	Unigene0044698	Unigene0023463	Unigene0046494	Unigene0018045	0.00119474	0.00634211	0.188382	0.0227	0.1205
ORTHOMCL10713	Unigene0027817	Unigene0032891	Unigene0015829	Unigene0020736	Unigene0042261	Unigene0021718	Unigene0025741	Unigene0041483	Unigene0036969	Unigene0024865	Unigene0033688	0.00383158	0.0203316	0.188455	0.0728	0.3864
ORTHOMCL6768	Unigene0044692	Unigene0006546	Unigene0009801	Unigene0007325	Unigene0007099	Unigene0010746	Unigene0046756	Unigene0002573	Unigene0029890	Unigene0002793	Unigene0002034	0.0082	0.0435053	0.188483	0.1558	0.8265
ORTHOMCL4550	Unigene0005723	Unigene0039668	Unigene0035712	Unigene0037098	Unigene0041748	Unigene0039844	Unigene0039075	Unigene0042358	Unigene0036371	Unigene0044099	Unigene0000069	0.00326842	0.0173316	0.188582	0.062	0.3293
ORTHOMCL6250	Unigene0032786	Unigene0014951	Unigene0019074	Unigene0025007	Unigene0018109	Unigene0023453	Unigene0009825	Unigene0007486	Unigene0001638	Unigene0035057	Unigene0012010	0.000978947	0.00518947	0.188641	0.0185	0.0986
ORTHOMCL6327	Unigene0028237	Unigene0009508	Unigene0008310	Unigene0010941	Unigene0022254	Unigene0016580	Unigene0020078	Unigene0025068	Unigene0037780	Unigene0001692	Unigene0013564	0.00292632	0.0154947	0.188859	0.0557	0.2945
ORTHOMCL8080	Unigene0033341	Unigene0023619	Unigene0037531	Unigene0022913	Unigene0003318	Unigene0042900	Unigene0042521	Unigene0037068	Unigene0015928	Unigene0015227	Unigene0006274	0.00182632	0.00966842	0.188895	0.0347	0.1836
ORTHOMCL9900	Unigene0035901	Unigene0038652	Unigene0007631	Unigene0037105	Unigene0017895	Unigene0010922	Unigene0039919	Unigene0009631	Unigene0020554	Unigene0049073	Unigene0034628	0.00322632	0.0170789	0.188906	0.0612	0.3248
ORTHOMCL4387	Unigene0001607	Unigene0038540	Unigene0000625	Unigene0000979	Unigene0000278	Unigene0001570	Unigene0000773	Unigene0001126	Unigene0035498	Unigene0000623	Unigene0000009	0.00506316	0.0268	0.188924	0.0964	0.5091
ORTHOMCL9508	Unigene0038285	Unigene0037722	Unigene0024680	Unigene0036631	Unigene0027280	Unigene0021568	Unigene0006087	Unigene0012689	Unigene0029178	Unigene0028734	Unigene0014434	0.00476842	0.0252211	0.189065	0.0905	0.4792
ORTHOMCL5137	Unigene0000656	Unigene0038601	Unigene0037769	Unigene0013106	Unigene0011361	Unigene0031964	Unigene0031074	Unigene0000438	Unigene0034101	Unigene0023578	Unigene0011311	0.00315789	0.0166947	0.189155	0.0601	0.3173
ORTHOMCL8807	Unigene0004376	Unigene0040821	Unigene0033427	Unigene0009213	Unigene0022521	Unigene0027270	Unigene0041424	Unigene0044051	Unigene0025571	Unigene0031543	Unigene0033734	0.00356316	0.0188368	0.189159	0.0679	0.3578
ORTHOMCL4784	Unigene0007674	Unigene0037846	Unigene0028451	Unigene0035103	Unigene0047726	Unigene0043532	Unigene0046341	Unigene0041519	Unigene0024741	Unigene0000180	Unigene0018452	0.0052	0.0274632	0.189345	0.0988	0.5217
ORTHOMCL5318	Unigene0003967	Unigene0040866	Unigene0036767	Unigene0019851	Unigene0045933	Unigene0008567	Unigene0046118	Unigene0004239	Unigene0000612	Unigene0013403	Unigene0011424	0.000768421	0.00405789	0.189364	0.0146	0.0772
ORTHOMCL4660	Unigene0045130	Unigene0002951	Unigene0037982	Unigene0004576	Unigene0013519	Unigene0000930	Unigene0000117	Unigene0000769	Unigene0021373	Unigene0008648	Unigene0032162	0.00554211	0.0292632	0.189388	0.1052	0.5559
ORTHOMCL5275	Unigene0043427	Unigene0025557	Unigene0024289	Unigene0035518	Unigene0026344	Unigene0029541	Unigene0046367	Unigene0040923	Unigene0000559	Unigene0027210	Unigene0032336	0.00227368	0.012	0.189474	0.0433	0.228
ORTHOMCL6726	Unigene0035493	Unigene0002006	Unigene0012209	Unigene0024735	Unigene0014999	Unigene0019528	Unigene0021414	Unigene0040243	Unigene0037043	Unigene0021405	Unigene0018727	0.000910526	0.00480526	0.189485	0.0173	0.0914
ORTHOMCL8156	Unigene0019751	Unigene0027326	Unigene0016455	Unigene0016311	Unigene0003398	Unigene0021337	Unigene0012014	Unigene0013126	Unigene0039766	Unigene0027053	Unigene0004048	0.00115263	0.00607895	0.18961	0.0219	0.1155
ORTHOMCL5115	Unigene0037432	Unigene0039459	Unigene0039157	Unigene0036053	Unigene0015953	Unigene0028771	Unigene0024331	Unigene0000422	Unigene0040866	Unigene0034935	Unigene0033918	0.00371053	0.0195684	0.189618	0.0705	0.3716
ORTHOMCL7266	Unigene0024518	Unigene0035955	Unigene0034683	Unigene0021241	Unigene0019245	Unigene0002533	Unigene0027425	Unigene0015666	Unigene0002474	Unigene0008017	Unigene0036056	0.00131053	0.00691053	0.189642	0.025	0.1313
ORTHOMCL5463	Unigene0037282	Unigene0034857	Unigene0042428	Unigene0000867	Unigene0026343	Unigene0002370	Unigene0033101	Unigene0031527	Unigene0033561	Unigene0012012	Unigene0028715	0.00304211	0.0160368	0.189695	0.0579	0.3046
ORTHOMCL9126	Unigene0013808	Unigene0028634	Unigene0036398	Unigene0020568	Unigene0030248	Unigene0004999	Unigene0046639	Unigene0009180	Unigene0014182	Unigene0029338	Unigene0033172	0.00165789	0.00873684	0.189759	0.0315	0.1661
ORTHOMCL6703	Unigene0010749	Unigene0037246	Unigene0031172	Unigene0013721	Unigene0020746	Unigene0012701	Unigene0001983	Unigene0014193	Unigene0020879	Unigene0025355	Unigene0022750	0.000842105	0.00443684	0.189798	0.0159	0.0843
ORTHOMCL9366	Unigene0015219	Unigene0012062	Unigene0022880	Unigene0016016	Unigene0042458	Unigene0040622	Unigene0021287	Unigene0012908	Unigene0005632	Unigene0014097	Unigene0007706	0.000889474	0.00468421	0.189888	0.0168	0.089
ORTHOMCL4390	Unigene0011840	Unigene0022909	Unigene0038612	Unigene0037649	Unigene0014426	Unigene0040752	Unigene0015198	Unigene0045125	Unigene0032902	Unigene0000010	Unigene0031715	0.00348421	0.0183474	0.189902	0.0661	0.3487
ORTHOMCL5320	Unigene0008273	Unigene0035982	Unigene0002755	Unigene0011487	Unigene0010513	Unigene0014170	Unigene0020925	Unigene0000614	Unigene0007926	Unigene0013792	Unigene0013703	0.00178421	0.00939474	0.189916	0.0339	0.1785
ORTHOMCL6998	Unigene0041995	Unigene0033031	Unigene0036565	Unigene0019803	Unigene0023964	Unigene0002220	Unigene0016428	Unigene0029964	Unigene0037001	Unigene0024196	Unigene0013932	0.00658421	0.0346474	0.190035	0.125	0.6585
ORTHOMCL4971	Unigene0000301	Unigene0021119	Unigene0033502	Unigene0033879	Unigene0015713	Unigene0010437	Unigene0041391	Unigene0003016	Unigene0036404	Unigene0025359	Unigene0035949	0.00183158	0.00963684	0.19006	0.0348	0.183
ORTHOMCL8241	Unigene0037960	Unigene0011297	Unigene0037264	Unigene0035069	Unigene0005742	Unigene0006865	Unigene0003508	Unigene0042567	Unigene0034825	Unigene0036457	Unigene0033407	0.00502632	0.0264421	0.190088	0.0954	0.5024
ORTHOMCL8431	Unigene0044883	Unigene0034265	Unigene0026629	Unigene0028219	Unigene0020054	Unigene0034341	Unigene0040124	Unigene0036892	Unigene0012939	Unigene0003750	Unigene0008971	0.000910526	0.00478947	0.19011	0.0172	0.0911
ORTHOMCL8442	Unigene0031316	Unigene0023857	Unigene0039709	Unigene0034981	Unigene0003770	Unigene0039027	Unigene0042200	Unigene0022025	Unigene0005268	Unigene0045800	Unigene0038021	0.00121579	0.00639474	0.190123	0.023	0.1214
ORTHOMCL10559	Unigene0015461	Unigene0013285	Unigene0041526	Unigene0038566	Unigene0047548	Unigene0044042	Unigene0046148	Unigene0044288	Unigene0015379	Unigene0030546	Unigene0033580	0.0755211	0.397132	0.190166	1.4347	7.5457
ORTHOMCL9173	Unigene0038513	Unigene0010317	Unigene0032632	Unigene0005542	Unigene0047446	Unigene0005111	Unigene0027974	Unigene0036423	Unigene0029574	Unigene0008404	Unigene0013772	0.00161579	0.00849474	0.190211	0.0308	0.1614
ORTHOMCL6454	Unigene0043724	Unigene0008280	Unigene0003967	Unigene0011015	Unigene0013143	Unigene0007029	Unigene0047985	Unigene0001786	Unigene0012456	Unigene0046790	Unigene0020306	0.00227895	0.0119789	0.190246	0.0433	0.2277
ORTHOMCL9974	Unigene0023793	Unigene0020520	Unigene0015342	Unigene0026062	Unigene0029046	Unigene0033139	Unigene0019656	Unigene0039445	Unigene0008033	Unigene0041002	Unigene0014240	0.000984211	0.00516842	0.190428	0.0188	0.0982
ORTHOMCL5107	Unigene0044409	Unigene0038860	Unigene0000415	Unigene0033092	Unigene0040431	Unigene0030489	Unigene0040890	Unigene0019663	Unigene0000442	Unigene0024936	Unigene0031794	0.00228947	0.0120211	0.190455	0.0434	0.2285
ORTHOMCL7251	Unigene0002450	Unigene0035100	Unigene0035042	Unigene0040488	Unigene0005143	Unigene0044678	Unigene0045177	Unigene0005437	Unigene0041654	Unigene0019827	Unigene0020281	0.00111579	0.00585263	0.190647	0.0213	0.1111
ORTHOMCL7010	Unigene0037575	Unigene0032841	Unigene0040644	Unigene0002230	Unigene0029634	Unigene0029492	Unigene0021611	Unigene0045403	Unigene0003025	Unigene0049490	Unigene0021321	0.00354211	0.0185789	0.190652	0.0674	0.3533
ORTHOMCL4861	Unigene0001795	Unigene0000698	Unigene0000274	Unigene0000997	Unigene0000861	Unigene0000800	Unigene0000227	Unigene0001386	Unigene0032732	Unigene0019213	Unigene0002828	0.00550526	0.0288684	0.190702	0.1047	0.5484
ORTHOMCL7225	Unigene0043781	Unigene0028344	Unigene0027617	Unigene0021171	Unigene0010260	Unigene0002428	Unigene0048325	Unigene0029171	Unigene0026443	Unigene0024362	Unigene0004651	0.00134737	0.00706316	0.19076	0.0256	0.1343
ORTHOMCL5419	Unigene0035629	Unigene0027443	Unigene0026527	Unigene0019493	Unigene0037369	Unigene0046910	Unigene0000787	Unigene0006421	Unigene0033628	Unigene0011373	Unigene0016265	0.00126316	0.00662105	0.190779	0.024	0.126
ORTHOMCL7149	Unigene0011652	Unigene0002710	Unigene0002364	Unigene0038728	Unigene0002722	Unigene0013032	Unigene0043204	Unigene0013118	Unigene0020841	Unigene0022359	Unigene0006212	0.000747368	0.00391579	0.19086	0.0144	0.0745
ORTHOMCL5464	Unigene0001277	Unigene0041411	Unigene0023890	Unigene0040769	Unigene0032981	Unigene0000867	Unigene0016275	Unigene0019577	Unigene0017874	Unigene0026985	Unigene0013166	0.00275263	0.0144158	0.190946	0.0521	0.2738
ORTHOMCL6311	Unigene0002249	Unigene0040086	Unigene0023760	Unigene0004768	Unigene0046816	Unigene0031433	Unigene0001679	Unigene0031079	Unigene0011986	Unigene0010320	Unigene0009635	0.00128947	0.00675263	0.190959	0.0245	0.1284
ORTHOMCL7646	Unigene0015056	Unigene0024224	Unigene0002834	Unigene0029173	Unigene0045424	Unigene0043678	Unigene0046988	Unigene0003357	Unigene0002922	Unigene0048930	Unigene0039371	0.000894737	0.00468421	0.191011	0.017	0.0891
ORTHOMCL5101	Unigene0000651	Unigene0036477	Unigene0005224	Unigene0027781	Unigene0030904	Unigene0045018	Unigene0047262	Unigene0004878	Unigene0040649	Unigene0013753	Unigene0000410	0.00194211	0.0101632	0.191093	0.0367	0.193
ORTHOMCL8371	Unigene0044243	Unigene0026572	Unigene0003668	Unigene0010447	Unigene0043670	Unigene0004967	Unigene0004632	Unigene0040902	Unigene0038965	Unigene0006612	Unigene0008627	0.000831579	0.00434737	0.191283	0.0159	0.0827
ORTHOMCL5273	Unigene0028978	Unigene0025872	Unigene0000557	Unigene0021383	Unigene0004384	Unigene0023407	Unigene0041754	Unigene0041736	Unigene0041679	Unigene0049479	Unigene0006394	0.00325789	0.0170211	0.191404	0.0618	0.3236
ORTHOMCL4629	Unigene0020487	Unigene0000975	Unigene0000240	Unigene0000319	Unigene0000102	Unigene0000807	Unigene0000231	Unigene0000562	Unigene0000428	Unigene0000711	Unigene0000165	0.00222105	0.0115895	0.191644	0.0424	0.2201
ORTHOMCL9904	Unigene0033771	Unigene0041878	Unigene0039088	Unigene0007645	Unigene0043089	Unigene0045129	Unigene0029828	Unigene0013444	Unigene0033478	Unigene0045930	Unigene0033584	0.00253684	0.0132368	0.19165	0.0484	0.2515
ORTHOMCL8155	Unigene0041542	Unigene0029672	Unigene0041217	Unigene0035146	Unigene0041794	Unigene0040396	Unigene0041570	Unigene0031452	Unigene0026286	Unigene0045619	Unigene0003396	0.00283684	0.0148	0.191679	0.0539	0.2813
ORTHOMCL7354	Unigene0043185	Unigene0037403	Unigene0043347	Unigene0033683	Unigene0041395	Unigene0043407	Unigene0006116	Unigene0043983	Unigene0022365	Unigene0048122	Unigene0002556	0.002	0.0104316	0.191726	0.038	0.1982
ORTHOMCL7016	Unigene0005014	Unigene0035433	Unigene0037292	Unigene0034625	Unigene0021622	Unigene0007548	Unigene0002238	Unigene0036036	Unigene0016514	Unigene0025120	Unigene0032129	0.00438421	0.0228632	0.191759	0.0831	0.4343
ORTHOMCL10034	Unigene0035034	Unigene0026344	Unigene0030268	Unigene0028331	Unigene0037518	Unigene0022239	Unigene0032794	Unigene0016317	Unigene0015327	Unigene0008327	Unigene0022254	0.00115263	0.00601053	0.191769	0.0219	0.1141
ORTHOMCL6233	Unigene0043345	Unigene0036658	Unigene0033698	Unigene0022289	Unigene0020982	Unigene0001624	Unigene0026767	Unigene0007438	Unigene0030399	Unigene0047525	Unigene0032421	0.000763158	0.00397895	0.191799	0.0145	0.0756
ORTHOMCL4425	Unigene0000553	Unigene0013191	Unigene0020483	Unigene0000950	Unigene0001166	Unigene0011144	Unigene0019478	Unigene0000623	Unigene0019812	Unigene0000023	Unigene0001029	0.00323158	0.0168421	0.191875	0.0612	0.3201
ORTHOMCL6941	Unigene0031681	Unigene0018798	Unigene0019282	Unigene0003310	Unigene0040673	Unigene0015441	Unigene0002172	Unigene0015946	Unigene0034844	Unigene0020025	Unigene0017702	0.00512632	0.0267105	0.191921	0.0975	0.5077
ORTHOMCL5438	Unigene0000810	Unigene0019063	Unigene0025585	Unigene0017982	Unigene0013216	Unigene0004998	Unigene0006198	Unigene0015805	Unigene0035324	Unigene0002889	Unigene0005914	0.000878947	0.00457895	0.191954	0.0167	0.087
ORTHOMCL10039	Unigene0033715	Unigene0015936	Unigene0025128	Unigene0025297	Unigene0039712	Unigene0036450	Unigene0039284	Unigene0008352	Unigene0025590	Unigene0041499	Unigene0027376	0.00146316	0.00762105	0.191989	0.0278	0.1449
ORTHOMCL4787	Unigene0001522	Unigene0000183	Unigene0021875	Unigene0000355	Unigene0000676	Unigene0000689	Unigene0000452	Unigene0001553	Unigene0000636	Unigene0001150	Unigene0000334	0.00420526	0.0219	0.192021	0.0798	0.4161
ORTHOMCL10524	Unigene0013928	Unigene0018378	Unigene0017448	Unigene0031176	Unigene0024396	Unigene0012784	Unigene0037494	Unigene0025679	Unigene0024481	Unigene0029422	Unigene0026285	0.00672105	0.0349895	0.192088	0.1278	0.6649
ORTHOMCL7301	Unigene0037776	Unigene0037689	Unigene0034501	Unigene0014690	Unigene0002511	Unigene0010762	Unigene0009775	Unigene0037272	Unigene0035601	Unigene0018933	Unigene0026051	0.00277368	0.0144316	0.192195	0.0527	0.2742
ORTHOMCL4897	Unigene0029233	Unigene0013959	Unigene0037147	Unigene0004311	Unigene0000248	Unigene0041114	Unigene0047795	Unigene0001765	Unigene0033477	Unigene0019953	Unigene0034261	0.00352105	0.0183158	0.192241	0.0668	0.3481
ORTHOMCL10821	Unigene0018297	Unigene0041662	Unigene0020815	Unigene0033262	Unigene0029237	Unigene0030302	Unigene0039190	Unigene0026087	Unigene0037184	Unigene0031736	Unigene0031485	0.00634211	0.0329737	0.192338	0.1204	0.6265
ORTHOMCL4636	Unigene0001129	Unigene0000421	Unigene0000167	Unigene0035638	Unigene0000989	Unigene0000105	Unigene0000885	Unigene0001169	Unigene0000655	Unigene0001099	Unigene0000358	0.00747895	0.0388684	0.192417	0.142	0.7384
ORTHOMCL4657	Unigene0001262	Unigene0034570	Unigene0020566	Unigene0017402	Unigene0000267	Unigene0034376	Unigene0000140	Unigene0013327	Unigene0032685	Unigene0000116	Unigene0000986	0.00454737	0.0236263	0.19247	0.0865	0.4486
ORTHOMCL8869	Unigene0016716	Unigene0040227	Unigene0038706	Unigene0034100	Unigene0011482	Unigene0014546	Unigene0007778	Unigene0021835	Unigene0042852	Unigene0004491	Unigene0019496	0.00183158	0.00951579	0.192478	0.0347	0.1807
ORTHOMCL6490	Unigene0041588	Unigene0023785	Unigene0001811	Unigene0040849	Unigene0006637	Unigene0002628	Unigene0045507	Unigene0004392	Unigene0015704	Unigene0048391	Unigene0034313	0.00143158	0.00743684	0.192498	0.0272	0.1414
ORTHOMCL7673	Unigene0009863	Unigene0002869	Unigene0030095	Unigene0026133	Unigene0036339	Unigene0038473	Unigene0017178	Unigene0036208	Unigene0040260	Unigene0035179	Unigene0024847	0.00120526	0.00625263	0.192761	0.023	0.1189
ORTHOMCL7697	Unigene0045788	Unigene0005376	Unigene0032203	Unigene0002896	Unigene0027236	Unigene0027849	Unigene0007744	Unigene0047677	Unigene0027351	Unigene0022886	Unigene0017713	0.000884211	0.00458421	0.192882	0.0168	0.0873
ORTHOMCL5398	Unigene0000761	Unigene0021191	Unigene0043343	Unigene0018656	Unigene0023962	Unigene0042627	Unigene0024126	Unigene0041787	Unigene0039165	Unigene0020114	Unigene0008380	0.00352105	0.0182526	0.192907	0.067	0.347
ORTHOMCL6615	Unigene0003190	Unigene0040611	Unigene0031369	Unigene0012077	Unigene0023128	Unigene0013754	Unigene0009008	Unigene0001924	Unigene0035896	Unigene0002514	Unigene0006951	0.00107368	0.00556316	0.192999	0.0205	0.1057
ORTHOMCL6879	Unigene0007288	Unigene0030175	Unigene0007884	Unigene0028529	Unigene0024250	Unigene0041100	Unigene0046431	Unigene0022906	Unigene0002119	Unigene0012236	Unigene0032797	0.00127895	0.00662632	0.19301	0.0244	0.1259
ORTHOMCL4443	Unigene0037610	Unigene0034423	Unigene0036976	Unigene0001000	Unigene0043654	Unigene0000030	Unigene0000540	Unigene0000787	Unigene0000062	Unigene0024130	Unigene0019226	0.00378947	0.0196316	0.193029	0.0722	0.3729
ORTHOMCL7286	Unigene0037113	Unigene0035040	Unigene0023619	Unigene0011709	Unigene0041969	Unigene0016578	Unigene0022256	Unigene0008267	Unigene0002499	Unigene0022787	Unigene0014061	0.00566842	0.0293474	0.193149	0.1078	0.5579
ORTHOMCL4575	Unigene0038058	Unigene0036290	Unigene0001299	Unigene0003892	Unigene0001560	Unigene0002076	Unigene0042342	Unigene0003791	Unigene0018430	Unigene0003112	Unigene0000079	0.00548421	0.0283789	0.193249	0.1044	0.5391
ORTHOMCL7549	Unigene0032470	Unigene0038313	Unigene0017236	Unigene0012591	Unigene0044439	Unigene0010685	Unigene0042600	Unigene0044758	Unigene0010773	Unigene0003717	Unigene0002744	0.000989474	0.00511579	0.193416	0.0188	0.0972
ORTHOMCL4621	Unigene0043218	Unigene0021688	Unigene0008405	Unigene0008709	Unigene0034030	Unigene0009263	Unigene0027298	Unigene0025875	Unigene0040062	Unigene0049002	Unigene0000098	0.0076	0.0392684	0.19354	0.1445	0.7462
ORTHOMCL7558	Unigene0028533	Unigene0014058	Unigene0038604	Unigene0021684	Unigene0019678	Unigene0041450	Unigene0002747	Unigene0002782	Unigene0005808	Unigene0030807	Unigene0022052	0.00201053	0.0103842	0.193614	0.0379	0.1974
ORTHOMCL9087	Unigene0040989	Unigene0028977	Unigene0007013	Unigene0004910	Unigene0047263	Unigene0046218	Unigene0043093	Unigene0007723	Unigene0010303	Unigene0016450	Unigene0030495	0.00401053	0.0207105	0.193647	0.0763	0.3934
ORTHOMCL8865	Unigene0011926	Unigene0030143	Unigene0013401	Unigene0020774	Unigene0017641	Unigene0037489	Unigene0011900	Unigene0005291	Unigene0018142	Unigene0031630	Unigene0004482	0.00538421	0.0278	0.193677	0.1023	0.5284
ORTHOMCL4560	Unigene0001603	Unigene0003323	Unigene0000872	Unigene0000074	Unigene0029380	Unigene0003305	Unigene0003099	Unigene0003154	Unigene0000313	Unigene0047731	Unigene0001028	0.00320526	0.0165474	0.193702	0.0611	0.3143
ORTHOMCL10026	Unigene0009490	Unigene0027591	Unigene0013391	Unigene0008295	Unigene0038335	Unigene0016255	Unigene0035549	Unigene0009863	Unigene0035798	Unigene0036577	Unigene0012460	0.000878947	0.00453684	0.193735	0.0169	0.0863
ORTHOMCL6957	Unigene0007951	Unigene0004824	Unigene0019443	Unigene0017311	Unigene0043222	Unigene0044304	Unigene0004724	Unigene0002184	Unigene0035372	Unigene0008885	Unigene0012972	0.00161579	0.00833684	0.193813	0.0306	0.1585
ORTHOMCL4591	Unigene0000184	Unigene0000690	Unigene0000216	Unigene0000854	Unigene0000915	Unigene0001183	Unigene0000111	Unigene0001133	Unigene0000660	Unigene0000085	Unigene0000301	0.00253684	0.0130842	0.193886	0.0482	0.2487
ORTHOMCL6955	Unigene0009313	Unigene0033893	Unigene0022954	Unigene0032715	Unigene0047282	Unigene0008773	Unigene0032237	Unigene0002182	Unigene0027074	Unigene0025215	Unigene0003352	0.000836842	0.00431579	0.193902	0.016	0.0819
ORTHOMCL7239	Unigene0039209	Unigene0002441	Unigene0005671	Unigene0031284	Unigene0014884	Unigene0011707	Unigene0024310	Unigene0030152	Unigene0005932	Unigene0021188	Unigene0017374	0.00372632	0.0192105	0.193973	0.0708	0.365
ORTHOMCL7374	Unigene0002575	Unigene0036759	Unigene0035741	Unigene0033110	Unigene0026681	Unigene0029283	Unigene0029814	Unigene0029487	Unigene0041781	Unigene0029495	Unigene0020275	0.00125789	0.00648421	0.193994	0.0239	0.1233
ORTHOMCL6614	Unigene0040673	Unigene0016228	Unigene0016904	Unigene0001922	Unigene0006148	Unigene0016533	Unigene0010889	Unigene0047346	Unigene0015015	Unigene0027591	Unigene0034243	0.00435789	0.0224579	0.194047	0.0828	0.4266
ORTHOMCL10957	Unigene0034365	Unigene0028614	Unigene0032588	Unigene0028360	Unigene0030509	Unigene0024493	Unigene0038206	Unigene0026572	Unigene0030466	Unigene0035450	Unigene0027236	0.000705263	0.00363158	0.194203	0.0135	0.069
ORTHOMCL5792	Unigene0037304	Unigene0002735	Unigene0009281	Unigene0001274	Unigene0007217	Unigene0045623	Unigene0010724	Unigene0013432	Unigene0024443	Unigene0010263	Unigene0035322	0.00348947	0.0179632	0.194257	0.0663	0.3414
ORTHOMCL4415	Unigene0022029	Unigene0004402	Unigene0012460	Unigene0015748	Unigene0046879	Unigene0040800	Unigene0000081	Unigene0041520	Unigene0039765	Unigene0048257	Unigene0000020	0.00324737	0.0167158	0.19427	0.0618	0.3177
ORTHOMCL5308	Unigene0006963	Unigene0007996	Unigene0033503	Unigene0030968	Unigene0026762	Unigene0000597	Unigene0014572	Unigene0002432	Unigene0040454	Unigene0044585	Unigene0035952	0.00117895	0.00606842	0.194276	0.0224	0.1154
ORTHOMCL6750	Unigene0002026	Unigene0022821	Unigene0040461	Unigene0035113	Unigene0002767	Unigene0006229	Unigene0038124	Unigene0004167	Unigene0041917	Unigene0042319	Unigene0023611	0.00146842	0.00755789	0.19429	0.028	0.1436
ORTHOMCL6787	Unigene0002045	Unigene0031813	Unigene0003867	Unigene0005440	Unigene0017333	Unigene0006923	Unigene0025706	Unigene0003577	Unigene0040916	Unigene0002689	Unigene0003027	0.00111579	0.00574211	0.194317	0.0212	0.1091
ORTHOMCL8953	Unigene0037150	Unigene0034985	Unigene0013688	Unigene0034608	Unigene0028562	Unigene0008909	Unigene0004637	Unigene0015934	Unigene0017173	Unigene0018368	Unigene0032787	0.00767368	0.0394842	0.194348	0.1458	0.7503
ORTHOMCL7539	Unigene0019770	Unigene0034242	Unigene0005430	Unigene0031897	Unigene0025285	Unigene0035488	Unigene0020877	Unigene0033273	Unigene0017647	Unigene0002734	Unigene0024671	0.00698947	0.0359632	0.194351	0.1327	0.6835
ORTHOMCL10417	Unigene0024212	Unigene0024590	Unigene0014857	Unigene0027098	Unigene0020722	Unigene0033084	Unigene0034176	Unigene0028966	Unigene0031426	Unigene0037981	Unigene0011637	0.00134211	0.00690526	0.19436	0.0256	0.1311
ORTHOMCL10032	Unigene0035631	Unigene0019537	Unigene0010360	Unigene0027149	Unigene0036369	Unigene0038553	Unigene0025761	Unigene0035374	Unigene0008320	Unigene0040991	Unigene0028146	0.000994737	0.00511579	0.194444	0.019	0.0972
ORTHOMCL5946	Unigene0043582	Unigene0020549	Unigene0019954	Unigene0010174	Unigene0001411	Unigene0041960	Unigene0044304	Unigene0023893	Unigene0040571	Unigene0046565	Unigene0032707	0.00432632	0.0222368	0.194556	0.0823	0.4224
ORTHOMCL5387	Unigene0000748	Unigene0039239	Unigene0043700	Unigene0002524	Unigene0041533	Unigene0040864	Unigene0004862	Unigene0004586	Unigene0040698	Unigene0046285	Unigene0038425	0.00165789	0.00852105	0.194565	0.0314	0.162
ORTHOMCL9356	Unigene0005615	Unigene0021522	Unigene0043339	Unigene0040326	Unigene0047793	Unigene0015381	Unigene0046618	Unigene0006137	Unigene0036751	Unigene0049466	Unigene0039395	0.00250526	0.0128737	0.194603	0.0476	0.2447
ORTHOMCL8926	Unigene0011066	Unigene0034134	Unigene0024655	Unigene0009345	Unigene0017802	Unigene0013631	Unigene0004575	Unigene0005933	Unigene0037689	Unigene0034778	Unigene0015218	0.00190526	0.00978947	0.194624	0.0363	0.1861
ORTHOMCL10660	Unigene0037811	Unigene0034913	Unigene0016871	Unigene0034985	Unigene0017349	Unigene0014780	Unigene0025531	Unigene0040709	Unigene0040303	Unigene0045366	Unigene0018042	0.00251053	0.0128947	0.194694	0.0477	0.2451
ORTHOMCL10701	Unigene0028767	Unigene0035949	Unigene0015605	Unigene0024902	Unigene0032095	Unigene0027745	Unigene0043542	Unigene0044137	Unigene0032673	Unigene0044296	Unigene0030128	0.00493684	0.0253474	0.194767	0.094	0.4816
ORTHOMCL7904	Unigene0045798	Unigene0033297	Unigene0010776	Unigene0038820	Unigene0005457	Unigene0044083	Unigene0003108	Unigene0025161	Unigene0023044	Unigene0003171	Unigene0015772	0.0013	0.00666842	0.194949	0.0246	0.1268
ORTHOMCL9894	Unigene0044015	Unigene0041094	Unigene0043785	Unigene0032805	Unigene0024878	Unigene0029420	Unigene0021521	Unigene0007610	Unigene0028348	Unigene0045920	Unigene0036715	0.00191053	0.0098	0.194952	0.0363	0.1862
ORTHOMCL8809	Unigene0004380	Unigene0015508	Unigene0039267	Unigene0032333	Unigene0043995	Unigene0024076	Unigene0030585	Unigene0043547	Unigene0037710	Unigene0025825	Unigene0030912	0.00148421	0.00761053	0.195021	0.0283	0.1445
ORTHOMCL5996	Unigene0015184	Unigene0020419	Unigene0003625	Unigene0018716	Unigene0047271	Unigene0020683	Unigene0004668	Unigene0001441	Unigene0035219	Unigene0022541	Unigene0033223	0.00224737	0.0115158	0.195155	0.0427	0.219
ORTHOMCL4597	Unigene0043645	Unigene0026963	Unigene0000107	Unigene0031670	Unigene0045366	Unigene0047138	Unigene0042839	Unigene0029051	Unigene0003275	Unigene0008578	Unigene0000088	0.00373158	0.0191158	0.195209	0.0709	0.3634
ORTHOMCL8900	Unigene0040513	Unigene0032697	Unigene0004547	Unigene0040474	Unigene0042719	Unigene0032958	Unigene0031721	Unigene0045889	Unigene0035812	Unigene0047879	Unigene0035740	0.00134737	0.0069	0.195271	0.0257	0.1311
ORTHOMCL5377	Unigene0000732	Unigene0040471	Unigene0040614	Unigene0034204	Unigene0043696	Unigene0044719	Unigene0032879	Unigene0025938	Unigene0032353	Unigene0026166	Unigene0031539	0.00152632	0.00781579	0.195286	0.0292	0.1485
ORTHOMCL7351	Unigene0002550	Unigene0039053	Unigene0018797	Unigene0039210	Unigene0006899	Unigene0003164	Unigene0048130	Unigene0008435	Unigene0014882	Unigene0019293	Unigene0015886	0.000705263	0.00361053	0.195335	0.0134	0.0686
ORTHOMCL8485	Unigene0003819	Unigene0017826	Unigene0021344	Unigene0029041	Unigene0011503	Unigene0037338	Unigene0023175	Unigene0016407	Unigene0013547	Unigene0039422	Unigene0018389	0.00112632	0.00576316	0.195434	0.0215	0.1095
ORTHOMCL10268	Unigene0039821	Unigene0027328	Unigene0042995	Unigene0021682	Unigene0015722	Unigene0016006	Unigene0036329	Unigene0020607	Unigene0038471	Unigene0010177	Unigene0017004	0.00365789	0.0187	0.195609	0.0696	0.3555
ORTHOMCL8720	Unigene0038942	Unigene0005914	Unigene0020249	Unigene0039526	Unigene0018149	Unigene0040003	Unigene0026582	Unigene0004209	Unigene0032299	Unigene0004347	Unigene0013255	0.00128421	0.00656316	0.19567	0.0245	0.1247
ORTHOMCL10210	Unigene0023590	Unigene0038707	Unigene0019687	Unigene0038039	Unigene0042464	Unigene0009727	Unigene0011824	Unigene0013037	Unigene0027820	Unigene0021648	Unigene0014604	0.00347895	0.0177789	0.195678	0.066	0.338
ORTHOMCL5415	Unigene0041324	Unigene0038477	Unigene0005050	Unigene0035915	Unigene0018002	Unigene0000784	Unigene0021004	Unigene0001906	Unigene0019693	Unigene0044955	Unigene0020049	0.00402105	0.0205421	0.195747	0.0766	0.3901
ORTHOMCL10511	Unigene0040272	Unigene0030307	Unigene0013639	Unigene0012642	Unigene0042948	Unigene0043924	Unigene0017229	Unigene0033873	Unigene0037003	Unigene0033180	Unigene0023957	0.00613684	0.0313421	0.195802	0.1166	0.5954
ORTHOMCL6860	Unigene0022155	Unigene0016285	Unigene0007373	Unigene0015457	Unigene0009411	Unigene0002104	Unigene0006629	Unigene0007360	Unigene0019616	Unigene0009340	Unigene0017438	0.00128421	0.00655789	0.195827	0.0245	0.1246
ORTHOMCL5682	Unigene0012812	Unigene0038605	Unigene0041113	Unigene0038591	Unigene0002689	Unigene0006600	Unigene0046970	Unigene0005276	Unigene0001182	Unigene0017345	Unigene0002039	0.00275263	0.0140526	0.19588	0.0523	0.267
ORTHOMCL9007	Unigene0007695	Unigene0033661	Unigene0014109	Unigene0004756	Unigene0044147	Unigene0042693	Unigene0043976	Unigene0022784	Unigene0024064	Unigene0047730	Unigene0006457	0.0100158	0.0511158	0.195943	0.1902	0.9709
ORTHOMCL9629	Unigene0040291	Unigene0028209	Unigene0033612	Unigene0039546	Unigene0027228	Unigene0006474	Unigene0009233	Unigene0044154	Unigene0020498	Unigene0009395	Unigene0029415	0.00505263	0.0257737	0.196038	0.0958	0.4899
ORTHOMCL10131	Unigene0018460	Unigene0041043	Unigene0015049	Unigene0012943	Unigene0008976	Unigene0022123	Unigene0038062	Unigene0047002	Unigene0010944	Unigene0019166	Unigene0010988	0.00138947	0.00707895	0.196283	0.0264	0.1344
ORTHOMCL5397	Unigene0000760	Unigene0013298	Unigene0036171	Unigene0024994	Unigene0019930	Unigene0045293	Unigene0018903	Unigene0014964	Unigene0038194	Unigene0012616	Unigene0038142	0.00793158	0.0403789	0.196429	0.1506	0.767
ORTHOMCL5150	Unigene0000447	Unigene0011349	Unigene0001560	Unigene0010361	Unigene0041038	Unigene0036200	Unigene0031432	Unigene0041324	Unigene0013106	Unigene0028460	Unigene0029976	0.00301579	0.0153526	0.196435	0.0573	0.2918
ORTHOMCL7866	Unigene0044210	Unigene0019993	Unigene0042127	Unigene0036283	Unigene0040899	Unigene0041850	Unigene0022457	Unigene0004528	Unigene0003064	Unigene0029364	Unigene0039588	0.00331053	0.0168526	0.19644	0.063	0.3201
ORTHOMCL7377	Unigene0004020	Unigene0018626	Unigene0002577	Unigene0040305	Unigene0022016	Unigene0015537	Unigene0027808	Unigene0003040	Unigene0038045	Unigene0023799	Unigene0006125	0.00331579	0.0168737	0.196507	0.0629	0.3206
ORTHOMCL8855	Unigene0042248	Unigene0021977	Unigene0031441	Unigene0030414	Unigene0009220	Unigene0015022	Unigene0004469	Unigene0020750	Unigene0032262	Unigene0042811	Unigene0012384	0.00207368	0.0105474	0.196607	0.0395	0.2004
ORTHOMCL4532	Unigene0041586	Unigene0000498	Unigene0037776	Unigene0025026	Unigene0039728	Unigene0039737	Unigene0042260	Unigene0041402	Unigene0000064	Unigene0029707	Unigene0036733	0.000978947	0.00497895	0.196617	0.0187	0.0949
ORTHOMCL4468	Unigene0025068	Unigene0030772	Unigene0019002	Unigene0033267	Unigene0028780	Unigene0023677	Unigene0046444	Unigene0012802	Unigene0000042	Unigene0015695	Unigene0014090	0.00535263	0.0272	0.196788	0.1017	0.5167
ORTHOMCL7536	Unigene0009606	Unigene0002880	Unigene0042109	Unigene0008810	Unigene0042835	Unigene0035135	Unigene0034732	Unigene0005545	Unigene0002731	Unigene0010845	Unigene0037231	0.000984211	0.005	0.196842	0.0188	0.095
ORTHOMCL5540	Unigene0038048	Unigene0038443	Unigene0022299	Unigene0027123	Unigene0020173	Unigene0028575	Unigene0027640	Unigene0004123	Unigene0019778	Unigene0001007	Unigene0028126	0.00133158	0.00676316	0.196887	0.0253	0.1286
ORTHOMCL6153	Unigene0026431	Unigene0010448	Unigene0029983	Unigene0013578	Unigene0025619	Unigene0009243	Unigene0027040	Unigene0018373	Unigene0024033	Unigene0031978	Unigene0001557	0.001	0.00507895	0.196891	0.019	0.0964
ORTHOMCL6396	Unigene0036572	Unigene0033212	Unigene0037176	Unigene0012267	Unigene0022153	Unigene0038216	Unigene0037308	Unigene0004566	Unigene0038755	Unigene0001747	Unigene0017287	0.00594737	0.0302	0.196933	0.113	0.5738
ORTHOMCL7858	Unigene0022726	Unigene0017971	Unigene0006413	Unigene0003058	Unigene0024492	Unigene0024714	Unigene0024095	Unigene0046674	Unigene0037874	Unigene0006131	Unigene0035995	0.00677895	0.0344158	0.196972	0.129	0.654
ORTHOMCL5929	Unigene0040004	Unigene0019575	Unigene0001400	Unigene0037607	Unigene0041536	Unigene0029691	Unigene0039695	Unigene0016435	Unigene0028413	Unigene0010073	Unigene0006934	0.00212632	0.0107947	0.196977	0.0403	0.2051
ORTHOMCL6905	Unigene0044525	Unigene0029851	Unigene0007247	Unigene0036988	Unigene0003694	Unigene0030624	Unigene0002144	Unigene0004923	Unigene0012465	Unigene0047845	Unigene0034556	0.00158947	0.00806842	0.196999	0.0302	0.1533
ORTHOMCL10767	Unigene0034759	Unigene0038022	Unigene0016847	Unigene0028483	Unigene0028863	Unigene0046598	Unigene0031161	Unigene0044665	Unigene0033798	Unigene0022038	Unigene0033091	0.00844737	0.0428474	0.19715	0.1604	0.8143
ORTHOMCL8099	Unigene0043286	Unigene0017346	Unigene0038243	Unigene0037747	Unigene0045658	Unigene0040463	Unigene0044917	Unigene0003335	Unigene0035469	Unigene0041003	Unigene0037970	0.00198947	0.0100895	0.197183	0.0376	0.1919
ORTHOMCL6937	Unigene0008483	Unigene0041971	Unigene0022967	Unigene0026901	Unigene0028744	Unigene0029547	Unigene0047518	Unigene0022800	Unigene0002170	Unigene0044935	Unigene0005697	0.00195263	0.0099	0.197236	0.0371	0.1881
ORTHOMCL8209	Unigene0043848	Unigene0039303	Unigene0003458	Unigene0040871	Unigene0004097	Unigene0046542	Unigene0005256	Unigene0013035	Unigene0041595	Unigene0040881	Unigene0026339	0.00128947	0.00653158	0.197421	0.0245	0.1239
ORTHOMCL10167	Unigene0039814	Unigene0017747	Unigene0026558	Unigene0025092	Unigene0037421	Unigene0037442	Unigene0027015	Unigene0045218	Unigene0021654	Unigene0049517	Unigene0009374	0.00322632	0.0163368	0.197487	0.0614	0.3105
ORTHOMCL7748	Unigene0043824	Unigene0013371	Unigene0038513	Unigene0019208	Unigene0002962	Unigene0024521	Unigene0009324	Unigene0003700	Unigene0019490	Unigene0049436	Unigene0029517	0.0645053	0.326584	0.197515	1.2256	6.2052
ORTHOMCL8020	Unigene0005602	Unigene0027902	Unigene0010043	Unigene0004694	Unigene0003241	Unigene0004189	Unigene0046585	Unigene0032810	Unigene0016610	Unigene0038223	Unigene0007985	0.0017	0.00860526	0.197554	0.0324	0.1635
ORTHOMCL4646	Unigene0038683	Unigene0002137	Unigene0015090	Unigene0036948	Unigene0000109	Unigene0025298	Unigene0005954	Unigene0042545	Unigene0023336	Unigene0042919	Unigene0038214	0.00704211	0.0356368	0.197607	0.1338	0.6773
ORTHOMCL5354	Unigene0045573	Unigene0025541	Unigene0000690	Unigene0004042	Unigene0042687	Unigene0009384	Unigene0043260	Unigene0008563	Unigene0037274	Unigene0013209	Unigene0018175	0.00113684	0.00575263	0.197621	0.0217	0.1094
ORTHOMCL8703	Unigene0030374	Unigene0004860	Unigene0009484	Unigene0016537	Unigene0011829	Unigene0004185	Unigene0013473	Unigene0026236	Unigene0026494	Unigene0013400	Unigene0006389	0.00394211	0.0199474	0.197625	0.0749	0.3789
ORTHOMCL6200	Unigene0004866	Unigene0003487	Unigene0005148	Unigene0040129	Unigene0024237	Unigene0001598	Unigene0026925	Unigene0025623	Unigene0041101	Unigene0047760	Unigene0035246	0.000794737	0.00402105	0.197644	0.015	0.0765
ORTHOMCL9021	Unigene0025764	Unigene0018898	Unigene0027901	Unigene0027310	Unigene0014013	Unigene0035497	Unigene0034735	Unigene0044807	Unigene0004787	Unigene0039703	Unigene0017794	0.00141579	0.00716316	0.197649	0.027	0.1361
[truncated: 4,277 more rows]

## Sheet: B
Purfication genes in 10 Chaenomeles germplams
[truncated: 468 more rows]

## Sheet: C
Weak positive selection genes in 10 Chaenomeles germplams
[truncated: 694 more rows]

## Sheet: D
Strong positive selection genes in 10 Chaenomeles germplams
[truncated: 46 more rows]
