# Supplementary material for: Comparative transcriptomics provides a strategy for phylogenetic analysis and SSR marker development in Chaenomeles
Source: Sci Rep. 2021 Aug 12;11:16441. doi: 10.1038/s41598-021-95776-z (PMC8361139; doi:10.1038/s41598-021-95776-z)
Supplement: Supplementary file 7 — Supplementary Table S6. [file 41598_2021_95776_MOESM7_ESM.xlsx]

## Sheet: Supplementary Table S6
	Statistics for single-copy genes containing SSR sites in 10 Chaenomeles germplams
DY	GP	MY	MYXZ	RB	XZ	XZSS	ZPCA	ZPLP	ZPLY	ZPXC
ORTHOMCL5774	ORTHOMCL7410	ORTHOMCL9301	ORTHOMCL5061	ORTHOMCL9301	ORTHOMCL5061	ORTHOMCL5061	ORTHOMCL5061	ORTHOMCL5061	ORTHOMCL9301	ORTHOMCL5061
ORTHOMCL9301	ORTHOMCL9301	ORTHOMCL9742	ORTHOMCL7481	ORTHOMCL9742	ORTHOMCL7481	ORTHOMCL9301	ORTHOMCL9373	ORTHOMCL7481	ORTHOMCL9742	ORTHOMCL9301
ORTHOMCL10782	ORTHOMCL9742	ORTHOMCL10782	ORTHOMCL9301	ORTHOMCL5439	ORTHOMCL9301	ORTHOMCL9742	ORTHOMCL7481	ORTHOMCL9301	ORTHOMCL5439	ORTHOMCL9742
ORTHOMCL5439	ORTHOMCL10782	ORTHOMCL5439	ORTHOMCL9742	ORTHOMCL8632	ORTHOMCL10782	ORTHOMCL10782	ORTHOMCL9301	ORTHOMCL9742	ORTHOMCL8632	ORTHOMCL5439
ORTHOMCL8632	ORTHOMCL8214	ORTHOMCL10736	ORTHOMCL10782	ORTHOMCL4576	ORTHOMCL5439	ORTHOMCL5439	ORTHOMCL9742	ORTHOMCL5439	ORTHOMCL4576	ORTHOMCL8632
ORTHOMCL10736	ORTHOMCL5045	ORTHOMCL10430	ORTHOMCL5439	ORTHOMCL10736	ORTHOMCL10736	ORTHOMCL10736	ORTHOMCL5439	ORTHOMCL5415	ORTHOMCL10736	ORTHOMCL10736
ORTHOMCL9137	ORTHOMCL5439	ORTHOMCL7761	ORTHOMCL10736	ORTHOMCL5745	ORTHOMCL10430	ORTHOMCL10430	ORTHOMCL10736	ORTHOMCL10736	ORTHOMCL5261	ORTHOMCL10430
ORTHOMCL10430	ORTHOMCL8632	ORTHOMCL6515	ORTHOMCL10430	ORTHOMCL6515	ORTHOMCL6515	ORTHOMCL6515	ORTHOMCL10430	ORTHOMCL10430	ORTHOMCL5745	ORTHOMCL6515
ORTHOMCL10475	ORTHOMCL10736	ORTHOMCL9245	ORTHOMCL7761	ORTHOMCL9245	ORTHOMCL9245	ORTHOMCL9245	ORTHOMCL7761	ORTHOMCL7761	ORTHOMCL10430	ORTHOMCL10475
ORTHOMCL8885	ORTHOMCL5261	ORTHOMCL10475	ORTHOMCL6515	ORTHOMCL10475	ORTHOMCL10475	ORTHOMCL10475	ORTHOMCL6515	ORTHOMCL6515	ORTHOMCL7761	ORTHOMCL8885
ORTHOMCL6700	ORTHOMCL5745	ORTHOMCL8885	ORTHOMCL9245	ORTHOMCL8885	ORTHOMCL6374	ORTHOMCL6374	ORTHOMCL9245	ORTHOMCL9245	ORTHOMCL6515	ORTHOMCL5137
ORTHOMCL8707	ORTHOMCL9137	ORTHOMCL5137	ORTHOMCL10475	ORTHOMCL5137	ORTHOMCL8885	ORTHOMCL8885	ORTHOMCL10475	ORTHOMCL8885	ORTHOMCL9245	ORTHOMCL5733
ORTHOMCL9073	ORTHOMCL10430	ORTHOMCL5733	ORTHOMCL5225	ORTHOMCL5733	ORTHOMCL5137	ORTHOMCL5137	ORTHOMCL8885	ORTHOMCL5137	ORTHOMCL10475	ORTHOMCL7944
ORTHOMCL7471	ORTHOMCL6952	ORTHOMCL7944	ORTHOMCL8885	ORTHOMCL7944	ORTHOMCL5733	ORTHOMCL5733	ORTHOMCL5137	ORTHOMCL5733	ORTHOMCL8885	ORTHOMCL7362
ORTHOMCL7362	ORTHOMCL6515	ORTHOMCL7362	ORTHOMCL5137	ORTHOMCL7362	ORTHOMCL7944	ORTHOMCL7944	ORTHOMCL5733	ORTHOMCL7944	ORTHOMCL5137	ORTHOMCL9734
ORTHOMCL10068	ORTHOMCL9245	ORTHOMCL9734	ORTHOMCL5733	ORTHOMCL10068	ORTHOMCL7362	ORTHOMCL7362	ORTHOMCL7944	ORTHOMCL7627	ORTHOMCL5733	ORTHOMCL4808
ORTHOMCL8800	ORTHOMCL10475	ORTHOMCL4808	ORTHOMCL7944	ORTHOMCL9734	ORTHOMCL9734	ORTHOMCL9734	ORTHOMCL7362	ORTHOMCL7362	ORTHOMCL9574	ORTHOMCL5179
ORTHOMCL5781	ORTHOMCL7127	ORTHOMCL5179	ORTHOMCL7362	ORTHOMCL4808	ORTHOMCL5179	ORTHOMCL4808	ORTHOMCL9734	ORTHOMCL9734	ORTHOMCL7944	ORTHOMCL7335
ORTHOMCL5050	ORTHOMCL8885	ORTHOMCL8800	ORTHOMCL9734	ORTHOMCL9206	ORTHOMCL8800	ORTHOMCL5179	ORTHOMCL4808	ORTHOMCL5179	ORTHOMCL7627	ORTHOMCL6262
ORTHOMCL5852	ORTHOMCL5733	ORTHOMCL6262	ORTHOMCL4808	ORTHOMCL7335	ORTHOMCL7335	ORTHOMCL8800	ORTHOMCL5179	ORTHOMCL7335	ORTHOMCL7471	ORTHOMCL4738
ORTHOMCL9276	ORTHOMCL9230	ORTHOMCL4738	ORTHOMCL5179	ORTHOMCL4738	ORTHOMCL6262	ORTHOMCL7335	ORTHOMCL7335	ORTHOMCL6262	ORTHOMCL7362	ORTHOMCL5852
ORTHOMCL5533	ORTHOMCL7362	ORTHOMCL9276	ORTHOMCL8800	ORTHOMCL5852	ORTHOMCL4738	ORTHOMCL6262	ORTHOMCL4738	ORTHOMCL4738	ORTHOMCL9734	ORTHOMCL5533
ORTHOMCL9900	ORTHOMCL9734	ORTHOMCL5533	ORTHOMCL7335	ORTHOMCL9276	ORTHOMCL5852	ORTHOMCL4738	ORTHOMCL5852	ORTHOMCL5206	ORTHOMCL4808	ORTHOMCL9900
ORTHOMCL8343	ORTHOMCL5179	ORTHOMCL9173	ORTHOMCL5852	ORTHOMCL10893	ORTHOMCL5533	ORTHOMCL5533	ORTHOMCL10893	ORTHOMCL4940	ORTHOMCL5179	ORTHOMCL5613
ORTHOMCL9885	ORTHOMCL7335	ORTHOMCL5206	ORTHOMCL9276	ORTHOMCL5533	ORTHOMCL9173	ORTHOMCL5206	ORTHOMCL5533	ORTHOMCL9350	ORTHOMCL8800	ORTHOMCL4940
ORTHOMCL6812	ORTHOMCL5050	ORTHOMCL9900	ORTHOMCL5533	ORTHOMCL5206	ORTHOMCL5206	ORTHOMCL9900	ORTHOMCL5206	ORTHOMCL9788	ORTHOMCL7335	ORTHOMCL9350
ORTHOMCL4542	ORTHOMCL7093	ORTHOMCL4822	ORTHOMCL9173	ORTHOMCL9900	ORTHOMCL9900	ORTHOMCL4542	ORTHOMCL5613	ORTHOMCL6165	ORTHOMCL9639	ORTHOMCL7226
ORTHOMCL6075	ORTHOMCL6262	ORTHOMCL10598	ORTHOMCL5206	ORTHOMCL5613	ORTHOMCL4940	ORTHOMCL4822	ORTHOMCL4940	ORTHOMCL7645	ORTHOMCL6262	ORTHOMCL9788
ORTHOMCL6592	ORTHOMCL9276	ORTHOMCL7226	ORTHOMCL9900	ORTHOMCL4940	ORTHOMCL4542	ORTHOMCL9350	ORTHOMCL9350	ORTHOMCL7239	ORTHOMCL4738	ORTHOMCL6165
ORTHOMCL4837	ORTHOMCL7469	ORTHOMCL9788	ORTHOMCL4940	ORTHOMCL7991	ORTHOMCL4822	ORTHOMCL7226	ORTHOMCL7226	ORTHOMCL8051	ORTHOMCL5852	ORTHOMCL7239
ORTHOMCL9788	ORTHOMCL8343	ORTHOMCL6165	ORTHOMCL4542	ORTHOMCL6812	ORTHOMCL9350	ORTHOMCL9788	ORTHOMCL9788	ORTHOMCL7702	ORTHOMCL5533	ORTHOMCL7702
ORTHOMCL6165	ORTHOMCL4940	ORTHOMCL7239	ORTHOMCL4822	ORTHOMCL4822	ORTHOMCL6046	ORTHOMCL6165	ORTHOMCL6165	ORTHOMCL4573	ORTHOMCL5206	ORTHOMCL4573
ORTHOMCL7239	ORTHOMCL4542	ORTHOMCL7702	ORTHOMCL9350	ORTHOMCL9350	ORTHOMCL10598	ORTHOMCL7239	ORTHOMCL7645	ORTHOMCL4589	ORTHOMCL9900	ORTHOMCL4589
ORTHOMCL7702	ORTHOMCL6075	ORTHOMCL4573	ORTHOMCL10598	ORTHOMCL7226	ORTHOMCL7226	ORTHOMCL4375	ORTHOMCL7239	ORTHOMCL6237	ORTHOMCL10056	ORTHOMCL6237
ORTHOMCL4573	ORTHOMCL6592	ORTHOMCL4722	ORTHOMCL7226	ORTHOMCL6165	ORTHOMCL9788	ORTHOMCL4573	ORTHOMCL7702	ORTHOMCL9109	ORTHOMCL5613	ORTHOMCL9109
ORTHOMCL4722	ORTHOMCL10598	ORTHOMCL4589	ORTHOMCL9788	ORTHOMCL7645	ORTHOMCL7239	ORTHOMCL6923	ORTHOMCL4573	ORTHOMCL7786	ORTHOMCL4940	ORTHOMCL4765
ORTHOMCL5972	ORTHOMCL6165	ORTHOMCL6237	ORTHOMCL6165	ORTHOMCL7239	ORTHOMCL7702	ORTHOMCL4589	ORTHOMCL4589	ORTHOMCL4765	ORTHOMCL4542	ORTHOMCL9051
ORTHOMCL9109	ORTHOMCL7239	ORTHOMCL9109	ORTHOMCL7239	ORTHOMCL7702	ORTHOMCL4589	ORTHOMCL6237	ORTHOMCL6237	ORTHOMCL9051	ORTHOMCL10598	ORTHOMCL10917
ORTHOMCL6223	ORTHOMCL9111	ORTHOMCL7786	ORTHOMCL7702	ORTHOMCL7371	ORTHOMCL6237	ORTHOMCL9109	ORTHOMCL9109	ORTHOMCL10917	ORTHOMCL7226	ORTHOMCL6532
ORTHOMCL4927	ORTHOMCL8051	ORTHOMCL6223	ORTHOMCL4573	ORTHOMCL4573	ORTHOMCL9109	ORTHOMCL7786	ORTHOMCL4927	ORTHOMCL6532	ORTHOMCL9788	ORTHOMCL5112
ORTHOMCL8888	ORTHOMCL7702	ORTHOMCL4927	ORTHOMCL4589	ORTHOMCL6923	ORTHOMCL7786	ORTHOMCL6223	ORTHOMCL5696	ORTHOMCL5112	ORTHOMCL6165	ORTHOMCL5834
ORTHOMCL9395	ORTHOMCL4573	ORTHOMCL8888	ORTHOMCL6237	ORTHOMCL4722	ORTHOMCL4927	ORTHOMCL4927	ORTHOMCL4765	ORTHOMCL5834	ORTHOMCL7239	ORTHOMCL10929
ORTHOMCL6532	ORTHOMCL4722	ORTHOMCL4765	ORTHOMCL9109	ORTHOMCL4589	ORTHOMCL8888	ORTHOMCL8888	ORTHOMCL10917	ORTHOMCL8456	ORTHOMCL7702	ORTHOMCL8257
ORTHOMCL5834	ORTHOMCL5972	ORTHOMCL9051	ORTHOMCL7786	ORTHOMCL6237	ORTHOMCL4765	ORTHOMCL4765	ORTHOMCL6532	ORTHOMCL10407	ORTHOMCL4589	ORTHOMCL8305
ORTHOMCL9643	ORTHOMCL6237	ORTHOMCL10917	ORTHOMCL6223	ORTHOMCL9109	ORTHOMCL9051	ORTHOMCL9051	ORTHOMCL5834	ORTHOMCL10929	ORTHOMCL6237	ORTHOMCL10046
ORTHOMCL10929	ORTHOMCL5856	ORTHOMCL6532	ORTHOMCL4927	ORTHOMCL7786	ORTHOMCL10917	ORTHOMCL10917	ORTHOMCL10407	ORTHOMCL8257	ORTHOMCL9109	ORTHOMCL6875
ORTHOMCL8257	ORTHOMCL6223	ORTHOMCL5112	ORTHOMCL4765	ORTHOMCL4927	ORTHOMCL6532	ORTHOMCL6532	ORTHOMCL10929	ORTHOMCL10046	ORTHOMCL7786	ORTHOMCL5677
ORTHOMCL6039	ORTHOMCL4927	ORTHOMCL5449	ORTHOMCL9051	ORTHOMCL5696	ORTHOMCL5112	ORTHOMCL5112	ORTHOMCL8257	ORTHOMCL8153	ORTHOMCL4927	ORTHOMCL4366
ORTHOMCL10046	ORTHOMCL4765	ORTHOMCL6226	ORTHOMCL10917	ORTHOMCL4765	ORTHOMCL5449	ORTHOMCL5449	ORTHOMCL6039	ORTHOMCL6875	ORTHOMCL10917	ORTHOMCL6528
ORTHOMCL6942	ORTHOMCL10564	ORTHOMCL10407	ORTHOMCL6532	ORTHOMCL9051	ORTHOMCL6226	ORTHOMCL6226	ORTHOMCL8305	ORTHOMCL6942	ORTHOMCL6532	ORTHOMCL4917
ORTHOMCL8473	ORTHOMCL10917	ORTHOMCL10929	ORTHOMCL5112	ORTHOMCL10917	ORTHOMCL8388	ORTHOMCL10929	ORTHOMCL10046	ORTHOMCL5526	ORTHOMCL5112	ORTHOMCL6318
ORTHOMCL5526	ORTHOMCL6532	ORTHOMCL8257	ORTHOMCL5449	ORTHOMCL6532	ORTHOMCL10929	ORTHOMCL8257	ORTHOMCL8153	ORTHOMCL5677	ORTHOMCL5834	ORTHOMCL8939
ORTHOMCL5677	ORTHOMCL5112	ORTHOMCL10046	ORTHOMCL5834	ORTHOMCL5112	ORTHOMCL8257	ORTHOMCL8305	ORTHOMCL6875	ORTHOMCL4390	ORTHOMCL10407	ORTHOMCL9798
ORTHOMCL6206	ORTHOMCL5834	ORTHOMCL8153	ORTHOMCL6226	ORTHOMCL5834	ORTHOMCL10046	ORTHOMCL10046	ORTHOMCL6942	ORTHOMCL4366	ORTHOMCL10929	ORTHOMCL4624
ORTHOMCL7790	ORTHOMCL6226	ORTHOMCL8473	ORTHOMCL10929	ORTHOMCL10407	ORTHOMCL8153	ORTHOMCL8153	ORTHOMCL8473	ORTHOMCL5268	ORTHOMCL8257	ORTHOMCL6248
ORTHOMCL4366	ORTHOMCL10407	ORTHOMCL5526	ORTHOMCL8257	ORTHOMCL10929	ORTHOMCL6875	ORTHOMCL6875	ORTHOMCL4923	ORTHOMCL4917	ORTHOMCL6039	ORTHOMCL6233
ORTHOMCL9798	ORTHOMCL9417	ORTHOMCL5677	ORTHOMCL10046	ORTHOMCL6039	ORTHOMCL8473	ORTHOMCL5526	ORTHOMCL5677	ORTHOMCL6318	ORTHOMCL5689	ORTHOMCL7423
ORTHOMCL9572	ORTHOMCL10929	ORTHOMCL4366	ORTHOMCL8153	ORTHOMCL10584	ORTHOMCL5677	ORTHOMCL5677	ORTHOMCL4366	ORTHOMCL8939	ORTHOMCL10046	ORTHOMCL5023
ORTHOMCL5019	ORTHOMCL8257	ORTHOMCL5268	ORTHOMCL6875	ORTHOMCL5689	ORTHOMCL7306	ORTHOMCL4366	ORTHOMCL5268	ORTHOMCL9798	ORTHOMCL8153	ORTHOMCL10159
ORTHOMCL6248	ORTHOMCL10584	ORTHOMCL4917	ORTHOMCL8473	ORTHOMCL10046	ORTHOMCL4366	ORTHOMCL4917	ORTHOMCL4917	ORTHOMCL4624	ORTHOMCL8473	ORTHOMCL7098
ORTHOMCL5023	ORTHOMCL4898	ORTHOMCL6318	ORTHOMCL5581	ORTHOMCL8153	ORTHOMCL5268	ORTHOMCL6318	ORTHOMCL6318	ORTHOMCL6248	ORTHOMCL5677	ORTHOMCL4501
ORTHOMCL10159	ORTHOMCL10046	ORTHOMCL8939	ORTHOMCL5677	ORTHOMCL6942	ORTHOMCL4917	ORTHOMCL8939	ORTHOMCL8939	ORTHOMCL7423	ORTHOMCL7306	ORTHOMCL9236
ORTHOMCL7098	ORTHOMCL8153	ORTHOMCL9798	ORTHOMCL4390	ORTHOMCL8473	ORTHOMCL6318	ORTHOMCL9798	ORTHOMCL9798	ORTHOMCL5023	ORTHOMCL4390	ORTHOMCL5340
ORTHOMCL4505	ORTHOMCL8473	ORTHOMCL4624	ORTHOMCL7790	ORTHOMCL5526	ORTHOMCL8939	ORTHOMCL6757	ORTHOMCL4624	ORTHOMCL10159	ORTHOMCL4366	ORTHOMCL8459
ORTHOMCL7336	ORTHOMCL4923	ORTHOMCL5365	ORTHOMCL4366	ORTHOMCL9281	ORTHOMCL9798	ORTHOMCL4624	ORTHOMCL6248	ORTHOMCL7098	ORTHOMCL5268	ORTHOMCL6276
ORTHOMCL5340	ORTHOMCL5677	ORTHOMCL6248	ORTHOMCL5268	ORTHOMCL7306	ORTHOMCL4624	ORTHOMCL6248	ORTHOMCL6233	ORTHOMCL9882	ORTHOMCL4917	ORTHOMCL5456
ORTHOMCL5165	ORTHOMCL6206	ORTHOMCL6233	ORTHOMCL4917	ORTHOMCL4366	ORTHOMCL5365	ORTHOMCL7423	ORTHOMCL7423	ORTHOMCL9236	ORTHOMCL6318	ORTHOMCL9232
ORTHOMCL8459	ORTHOMCL7306	ORTHOMCL7423	ORTHOMCL6318	ORTHOMCL5268	ORTHOMCL6233	ORTHOMCL5023	ORTHOMCL10159	ORTHOMCL5340	ORTHOMCL8939	ORTHOMCL8295
ORTHOMCL6276	ORTHOMCL4366	ORTHOMCL5023	ORTHOMCL8939	ORTHOMCL4917	ORTHOMCL7423	ORTHOMCL10159	ORTHOMCL7098	ORTHOMCL8459	ORTHOMCL9798	ORTHOMCL6461
ORTHOMCL9400	ORTHOMCL10626	ORTHOMCL10159	ORTHOMCL9798	ORTHOMCL6318	ORTHOMCL5023	ORTHOMCL7098	ORTHOMCL4501	ORTHOMCL6276	ORTHOMCL4624	ORTHOMCL7514
ORTHOMCL6461	ORTHOMCL8939	ORTHOMCL9020	ORTHOMCL4624	ORTHOMCL9798	ORTHOMCL10159	ORTHOMCL9020	ORTHOMCL9236	ORTHOMCL5530	ORTHOMCL6248	ORTHOMCL10262
ORTHOMCL7514	ORTHOMCL9798	ORTHOMCL4501	ORTHOMCL6233	ORTHOMCL4624	ORTHOMCL7098	ORTHOMCL5390	ORTHOMCL5340	ORTHOMCL5456	ORTHOMCL6233	ORTHOMCL9453
ORTHOMCL9453	ORTHOMCL6757	ORTHOMCL9236	ORTHOMCL7423	ORTHOMCL6248	ORTHOMCL9020	ORTHOMCL4501	ORTHOMCL8459	ORTHOMCL4383	ORTHOMCL5051	ORTHOMCL7399
ORTHOMCL7327	ORTHOMCL9572	ORTHOMCL5340	ORTHOMCL5051	ORTHOMCL7423	ORTHOMCL8582	ORTHOMCL9236	ORTHOMCL5530	ORTHOMCL9232	ORTHOMCL5023	ORTHOMCL7327
ORTHOMCL7295	ORTHOMCL4624	ORTHOMCL8459	ORTHOMCL5023	ORTHOMCL5023	ORTHOMCL5390	ORTHOMCL5340	ORTHOMCL5456	ORTHOMCL8295	ORTHOMCL10159	ORTHOMCL5835
ORTHOMCL6615	ORTHOMCL6248	ORTHOMCL5530	ORTHOMCL10159	ORTHOMCL10159	ORTHOMCL4501	ORTHOMCL5165	ORTHOMCL4383	ORTHOMCL6461	ORTHOMCL7098	ORTHOMCL8425
ORTHOMCL5835	ORTHOMCL7423	ORTHOMCL5456	ORTHOMCL7098	ORTHOMCL7098	ORTHOMCL5541	ORTHOMCL8459	ORTHOMCL9232	ORTHOMCL7514	ORTHOMCL4501	ORTHOMCL6429
ORTHOMCL8425	ORTHOMCL5023	ORTHOMCL4383	ORTHOMCL9020	ORTHOMCL9882	ORTHOMCL9236	ORTHOMCL5530	ORTHOMCL7514	ORTHOMCL10262	ORTHOMCL8857	ORTHOMCL5306
ORTHOMCL10709	ORTHOMCL10159	ORTHOMCL9232	ORTHOMCL5390	ORTHOMCL5390	ORTHOMCL5340	ORTHOMCL5456	ORTHOMCL10262	ORTHOMCL8618	ORTHOMCL9236	ORTHOMCL7454
ORTHOMCL7007	ORTHOMCL4501	ORTHOMCL8295	ORTHOMCL4501	ORTHOMCL4501	ORTHOMCL8459	ORTHOMCL4383	ORTHOMCL9453	ORTHOMCL9453	ORTHOMCL5340	ORTHOMCL6148
ORTHOMCL10499	ORTHOMCL7336	ORTHOMCL6461	ORTHOMCL8857	ORTHOMCL9236	ORTHOMCL5456	ORTHOMCL9232	ORTHOMCL7399	ORTHOMCL7399	ORTHOMCL10286	ORTHOMCL6306
ORTHOMCL9189	ORTHOMCL10936	ORTHOMCL10262	ORTHOMCL9236	ORTHOMCL5340	ORTHOMCL4383	ORTHOMCL10262	ORTHOMCL7327	ORTHOMCL7327	ORTHOMCL8459	ORTHOMCL10694
ORTHOMCL5528	ORTHOMCL5340	ORTHOMCL9453	ORTHOMCL5340	ORTHOMCL8459	ORTHOMCL9232	ORTHOMCL9453	ORTHOMCL5835	ORTHOMCL5835	ORTHOMCL6276	ORTHOMCL5298
ORTHOMCL8691	ORTHOMCL5739	ORTHOMCL7399	ORTHOMCL8459	ORTHOMCL5456	ORTHOMCL8295	ORTHOMCL7399	ORTHOMCL8425	ORTHOMCL8425	ORTHOMCL5456	ORTHOMCL9189
ORTHOMCL8742	ORTHOMCL8459	ORTHOMCL7327	ORTHOMCL6276	ORTHOMCL4383	ORTHOMCL6461	ORTHOMCL7327	ORTHOMCL6429	ORTHOMCL6429	ORTHOMCL4383	ORTHOMCL8817
ORTHOMCL5402	ORTHOMCL6276	ORTHOMCL9921	ORTHOMCL5530	ORTHOMCL9232	ORTHOMCL10262	ORTHOMCL5835	ORTHOMCL8545	ORTHOMCL7454	ORTHOMCL9232	ORTHOMCL5588
ORTHOMCL8645	ORTHOMCL5328	ORTHOMCL5835	ORTHOMCL5456	ORTHOMCL6461	ORTHOMCL9453	ORTHOMCL8425	ORTHOMCL7454	ORTHOMCL6306	ORTHOMCL8295	ORTHOMCL5402
ORTHOMCL9204	ORTHOMCL9400	ORTHOMCL8425	ORTHOMCL4383	ORTHOMCL10262	ORTHOMCL7399	ORTHOMCL6429	ORTHOMCL6306	ORTHOMCL10694	ORTHOMCL10262	ORTHOMCL9204
ORTHOMCL7080	ORTHOMCL4383	ORTHOMCL10709	ORTHOMCL9232	ORTHOMCL9453	ORTHOMCL9921	ORTHOMCL7454	ORTHOMCL10694	ORTHOMCL5298	ORTHOMCL9453	ORTHOMCL7080
ORTHOMCL8698	ORTHOMCL6461	ORTHOMCL6429	ORTHOMCL6461	ORTHOMCL7399	ORTHOMCL5835	ORTHOMCL10694	ORTHOMCL9189	ORTHOMCL9189	ORTHOMCL7399	ORTHOMCL6895
ORTHOMCL6895	ORTHOMCL9453	ORTHOMCL5105	ORTHOMCL10262	ORTHOMCL7327	ORTHOMCL8425	ORTHOMCL5298	ORTHOMCL8817	ORTHOMCL8817	ORTHOMCL7327	ORTHOMCL10534
ORTHOMCL6832	ORTHOMCL7327	ORTHOMCL7454	ORTHOMCL9453	ORTHOMCL9921	ORTHOMCL10512	ORTHOMCL9189	ORTHOMCL5402	ORTHOMCL5402	ORTHOMCL5835	ORTHOMCL6614
ORTHOMCL6739	ORTHOMCL5835	ORTHOMCL6306	ORTHOMCL7399	ORTHOMCL5835	ORTHOMCL6429	ORTHOMCL8817	ORTHOMCL9204	ORTHOMCL8645	ORTHOMCL8425	ORTHOMCL5056
ORTHOMCL6614	ORTHOMCL5067	ORTHOMCL10694	ORTHOMCL7327	ORTHOMCL8425	ORTHOMCL5306	ORTHOMCL5402	ORTHOMCL7080	ORTHOMCL9204	ORTHOMCL6429	ORTHOMCL10890
ORTHOMCL10890	ORTHOMCL10709	ORTHOMCL9189	ORTHOMCL9921	ORTHOMCL6429	ORTHOMCL7454	ORTHOMCL8645	ORTHOMCL6895	ORTHOMCL7080	ORTHOMCL7454	ORTHOMCL5794
ORTHOMCL10305	ORTHOMCL7007	ORTHOMCL8817	ORTHOMCL5835	ORTHOMCL8545	ORTHOMCL6148	ORTHOMCL9204	ORTHOMCL6832	ORTHOMCL6895	ORTHOMCL6306	ORTHOMCL10771
ORTHOMCL10082	ORTHOMCL7454	ORTHOMCL5588	ORTHOMCL8425	ORTHOMCL7454	ORTHOMCL6306	ORTHOMCL7080	ORTHOMCL6739	ORTHOMCL6832	ORTHOMCL10694	ORTHOMCL8540
ORTHOMCL5794	ORTHOMCL5298	ORTHOMCL5402	ORTHOMCL10512	ORTHOMCL6306	ORTHOMCL10694	ORTHOMCL6895	ORTHOMCL6614	ORTHOMCL6739	ORTHOMCL9189	ORTHOMCL9789
ORTHOMCL10771	ORTHOMCL9189	ORTHOMCL9204	ORTHOMCL6429	ORTHOMCL5298	ORTHOMCL5298	ORTHOMCL10534	ORTHOMCL5056	ORTHOMCL6614	ORTHOMCL8817	ORTHOMCL10579
ORTHOMCL6891	ORTHOMCL8817	ORTHOMCL7080	ORTHOMCL7454	ORTHOMCL9189	ORTHOMCL8817	ORTHOMCL6739	ORTHOMCL5794	ORTHOMCL10890	ORTHOMCL8645	ORTHOMCL5422
ORTHOMCL7605	ORTHOMCL8645	ORTHOMCL6895	ORTHOMCL6306	ORTHOMCL8817	ORTHOMCL5402	ORTHOMCL6614	ORTHOMCL8540	ORTHOMCL5831	ORTHOMCL9204	ORTHOMCL6424
ORTHOMCL4696	ORTHOMCL9204	ORTHOMCL6739	ORTHOMCL5298	ORTHOMCL5402	ORTHOMCL8645	ORTHOMCL10082	ORTHOMCL9789	ORTHOMCL5794	ORTHOMCL7080	ORTHOMCL10410
ORTHOMCL10579	ORTHOMCL7080	ORTHOMCL6614	ORTHOMCL9189	ORTHOMCL9204	ORTHOMCL9204	ORTHOMCL5794	ORTHOMCL10579	ORTHOMCL10771	ORTHOMCL6895	ORTHOMCL10191
ORTHOMCL6639	ORTHOMCL5311	ORTHOMCL10890	ORTHOMCL8817	ORTHOMCL7080	ORTHOMCL7080	ORTHOMCL10771	ORTHOMCL5422	ORTHOMCL8540	ORTHOMCL6832	ORTHOMCL9197
ORTHOMCL6424	ORTHOMCL6832	ORTHOMCL5831	ORTHOMCL5588	ORTHOMCL6895	ORTHOMCL6895	ORTHOMCL8540	ORTHOMCL6424	ORTHOMCL7605	ORTHOMCL10534	ORTHOMCL7168
ORTHOMCL10465	ORTHOMCL7738	ORTHOMCL10082	ORTHOMCL5402	ORTHOMCL6832	ORTHOMCL6832	ORTHOMCL7605	ORTHOMCL8834	ORTHOMCL10579	ORTHOMCL6739	ORTHOMCL5540
ORTHOMCL8215	ORTHOMCL6739	ORTHOMCL5794	ORTHOMCL8645	ORTHOMCL6739	ORTHOMCL10534	ORTHOMCL10579	ORTHOMCL9197	ORTHOMCL6639	ORTHOMCL6614	ORTHOMCL9925
ORTHOMCL5601	ORTHOMCL6614	ORTHOMCL10771	ORTHOMCL9204	ORTHOMCL6614	ORTHOMCL6739	ORTHOMCL5422	ORTHOMCL7168	ORTHOMCL5422	ORTHOMCL5056	ORTHOMCL8505
ORTHOMCL6704	ORTHOMCL5056	ORTHOMCL10579	ORTHOMCL7080	ORTHOMCL5056	ORTHOMCL6614	ORTHOMCL8834	ORTHOMCL5540	ORTHOMCL6424	ORTHOMCL10890	ORTHOMCL10927
ORTHOMCL7436	ORTHOMCL5794	ORTHOMCL6639	ORTHOMCL6895	ORTHOMCL10890	ORTHOMCL10082	ORTHOMCL10410	ORTHOMCL9925	ORTHOMCL10191	ORTHOMCL10082	ORTHOMCL5122
ORTHOMCL9197	ORTHOMCL8540	ORTHOMCL5422	ORTHOMCL10534	ORTHOMCL10082	ORTHOMCL8207	ORTHOMCL10191	ORTHOMCL8505	ORTHOMCL9197	ORTHOMCL9442	ORTHOMCL9580
ORTHOMCL7168	ORTHOMCL7605	ORTHOMCL6424	ORTHOMCL6739	ORTHOMCL5794	ORTHOMCL5794	ORTHOMCL9962	ORTHOMCL10927	ORTHOMCL7168	ORTHOMCL5794	ORTHOMCL8771
ORTHOMCL5540	ORTHOMCL9789	ORTHOMCL8834	ORTHOMCL6614	ORTHOMCL6891	ORTHOMCL8540	ORTHOMCL9197	ORTHOMCL5122	ORTHOMCL5540	ORTHOMCL10771	ORTHOMCL8460
ORTHOMCL9925	ORTHOMCL6424	ORTHOMCL10410	ORTHOMCL10890	ORTHOMCL5322	ORTHOMCL7605	ORTHOMCL7168	ORTHOMCL9580	ORTHOMCL9925	ORTHOMCL6891	ORTHOMCL10279
ORTHOMCL10927	ORTHOMCL5470	ORTHOMCL10191	ORTHOMCL5831	ORTHOMCL8540	ORTHOMCL4487	ORTHOMCL5540	ORTHOMCL8771	ORTHOMCL8505	ORTHOMCL8540	ORTHOMCL9268
ORTHOMCL5122	ORTHOMCL4965	ORTHOMCL9962	ORTHOMCL10082	ORTHOMCL10579	ORTHOMCL10579	ORTHOMCL9925	ORTHOMCL8460	ORTHOMCL10927	ORTHOMCL7605	ORTHOMCL7882
ORTHOMCL8771	ORTHOMCL8834	ORTHOMCL9197	ORTHOMCL5794	ORTHOMCL5422	ORTHOMCL5422	ORTHOMCL8505	ORTHOMCL10279	ORTHOMCL5122	ORTHOMCL10579	ORTHOMCL10747
ORTHOMCL10086	ORTHOMCL10191	ORTHOMCL7168	ORTHOMCL10771	ORTHOMCL6424	ORTHOMCL6424	ORTHOMCL10927	ORTHOMCL9268	ORTHOMCL9580	ORTHOMCL6639	ORTHOMCL5970
ORTHOMCL9750	ORTHOMCL9962	ORTHOMCL5540	ORTHOMCL8540	ORTHOMCL9990	ORTHOMCL10103	ORTHOMCL5122	ORTHOMCL7882	ORTHOMCL8771	ORTHOMCL5422	ORTHOMCL9103
ORTHOMCL10747	ORTHOMCL9197	ORTHOMCL9925	ORTHOMCL10579	ORTHOMCL8834	ORTHOMCL8834	ORTHOMCL9580	ORTHOMCL10747	ORTHOMCL8460	ORTHOMCL6424	ORTHOMCL4876
ORTHOMCL4666	ORTHOMCL7168	ORTHOMCL8505	ORTHOMCL5422	ORTHOMCL10191	ORTHOMCL10410	ORTHOMCL8771	ORTHOMCL5970	ORTHOMCL10086	ORTHOMCL10191	ORTHOMCL4532
ORTHOMCL5970	ORTHOMCL5540	ORTHOMCL10927	ORTHOMCL6424	ORTHOMCL5071	ORTHOMCL10191	ORTHOMCL8460	ORTHOMCL9103	ORTHOMCL10279	ORTHOMCL9962	ORTHOMCL5373
ORTHOMCL9103	ORTHOMCL7446	ORTHOMCL5122	ORTHOMCL8834	ORTHOMCL9962	ORTHOMCL9197	ORTHOMCL10086	ORTHOMCL4532	ORTHOMCL9268	ORTHOMCL9197	ORTHOMCL5611
ORTHOMCL6064	ORTHOMCL8813	ORTHOMCL9580	ORTHOMCL10410	ORTHOMCL9197	ORTHOMCL7168	ORTHOMCL10279	ORTHOMCL5611	ORTHOMCL10747	ORTHOMCL7168	ORTHOMCL10456
ORTHOMCL4532	ORTHOMCL7858	ORTHOMCL8771	ORTHOMCL10191	ORTHOMCL7168	ORTHOMCL5540	ORTHOMCL9268	ORTHOMCL10456	ORTHOMCL5970	ORTHOMCL5540	ORTHOMCL10731
ORTHOMCL4632	ORTHOMCL5122	ORTHOMCL8460	ORTHOMCL9197	ORTHOMCL5540	ORTHOMCL9925	ORTHOMCL7882	ORTHOMCL10731	ORTHOMCL9103	ORTHOMCL9925	ORTHOMCL5949
ORTHOMCL10456	ORTHOMCL9580	ORTHOMCL10086	ORTHOMCL7168	ORTHOMCL9925	ORTHOMCL8505	ORTHOMCL6941	ORTHOMCL7771	ORTHOMCL5373	ORTHOMCL8505	ORTHOMCL7771
ORTHOMCL7994	ORTHOMCL8771	ORTHOMCL10279	ORTHOMCL5540	ORTHOMCL5122	ORTHOMCL10927	ORTHOMCL10747	ORTHOMCL4759	ORTHOMCL5611	ORTHOMCL10927	ORTHOMCL4759
ORTHOMCL10731	ORTHOMCL8460	ORTHOMCL9268	ORTHOMCL9925	ORTHOMCL5590	ORTHOMCL5122	ORTHOMCL5970	ORTHOMCL5314	ORTHOMCL10731	ORTHOMCL5122	ORTHOMCL5314
ORTHOMCL5314	ORTHOMCL10086	ORTHOMCL7882	ORTHOMCL8505	ORTHOMCL8771	ORTHOMCL9580	ORTHOMCL9103	ORTHOMCL10906	ORTHOMCL7771	ORTHOMCL5590	ORTHOMCL10906
ORTHOMCL5961	ORTHOMCL9268	ORTHOMCL10747	ORTHOMCL10927	ORTHOMCL8460	ORTHOMCL8771	ORTHOMCL4532	ORTHOMCL5149	ORTHOMCL4759	ORTHOMCL8771	ORTHOMCL5961
ORTHOMCL10599	ORTHOMCL5970	ORTHOMCL5970	ORTHOMCL5122	ORTHOMCL9268	ORTHOMCL8460	ORTHOMCL10456	ORTHOMCL10491	ORTHOMCL5314	ORTHOMCL8460	ORTHOMCL6738
ORTHOMCL8830	ORTHOMCL9103	ORTHOMCL4876	ORTHOMCL9580	ORTHOMCL10747	ORTHOMCL10086	ORTHOMCL10731	ORTHOMCL4933	ORTHOMCL10906	ORTHOMCL10086	ORTHOMCL10491
ORTHOMCL10323	ORTHOMCL6529	ORTHOMCL4532	ORTHOMCL8771	ORTHOMCL5970	ORTHOMCL10279	ORTHOMCL7771	ORTHOMCL10323	ORTHOMCL5868	ORTHOMCL10279	ORTHOMCL4933
ORTHOMCL6312	ORTHOMCL4876	ORTHOMCL5373	ORTHOMCL8460	ORTHOMCL9103	ORTHOMCL9268	ORTHOMCL4759	ORTHOMCL8374	ORTHOMCL5149	ORTHOMCL9268	ORTHOMCL10185
ORTHOMCL5982	ORTHOMCL6064	ORTHOMCL5611	ORTHOMCL10086	ORTHOMCL6529	ORTHOMCL7882	ORTHOMCL5314	ORTHOMCL4725	ORTHOMCL7475	ORTHOMCL7882	ORTHOMCL6312
ORTHOMCL5412	ORTHOMCL10806	ORTHOMCL10456	ORTHOMCL10279	ORTHOMCL4876	ORTHOMCL10747	ORTHOMCL10906	ORTHOMCL10185	ORTHOMCL5961	ORTHOMCL10747	ORTHOMCL9604
ORTHOMCL7032	ORTHOMCL5880	ORTHOMCL8634	ORTHOMCL9268	ORTHOMCL4532	ORTHOMCL5970	ORTHOMCL5088	ORTHOMCL6312	ORTHOMCL10491	ORTHOMCL5970	ORTHOMCL10678
ORTHOMCL5368	ORTHOMCL8634	ORTHOMCL7994	ORTHOMCL7882	ORTHOMCL6041	ORTHOMCL9103	ORTHOMCL5149	ORTHOMCL9604	ORTHOMCL4933	ORTHOMCL9103	ORTHOMCL5507
ORTHOMCL7364	ORTHOMCL7912	ORTHOMCL10731	ORTHOMCL10254	ORTHOMCL10456	ORTHOMCL4532	ORTHOMCL7475	ORTHOMCL10678	ORTHOMCL10323	ORTHOMCL6529	ORTHOMCL5368
ORTHOMCL5450	ORTHOMCL10731	ORTHOMCL7771	ORTHOMCL10747	ORTHOMCL10731	ORTHOMCL5373	ORTHOMCL10491	ORTHOMCL5982	ORTHOMCL4835	ORTHOMCL4876	ORTHOMCL7569
ORTHOMCL7580	ORTHOMCL5314	ORTHOMCL5314	ORTHOMCL5970	ORTHOMCL5949	ORTHOMCL10731	ORTHOMCL4933	ORTHOMCL7032	ORTHOMCL4725	ORTHOMCL4532	ORTHOMCL10108
ORTHOMCL4616	ORTHOMCL10906	ORTHOMCL10906	ORTHOMCL9103	ORTHOMCL7771	ORTHOMCL7771	ORTHOMCL10323	ORTHOMCL5368	ORTHOMCL10185	ORTHOMCL10456	ORTHOMCL5450
ORTHOMCL10990	ORTHOMCL5088	ORTHOMCL5088	ORTHOMCL4532	ORTHOMCL4759	ORTHOMCL4759	ORTHOMCL8374	ORTHOMCL10108	ORTHOMCL6312	ORTHOMCL10731	ORTHOMCL7580
ORTHOMCL8438	ORTHOMCL10728	ORTHOMCL5149	ORTHOMCL5373	ORTHOMCL5314	ORTHOMCL5314	ORTHOMCL5984	ORTHOMCL7580	ORTHOMCL9604	ORTHOMCL7771	ORTHOMCL4616
ORTHOMCL5310	ORTHOMCL6120	ORTHOMCL7475	ORTHOMCL5611	ORTHOMCL10906	ORTHOMCL10906	ORTHOMCL10185	ORTHOMCL4616	ORTHOMCL10678	ORTHOMCL4759	ORTHOMCL6189
ORTHOMCL5572	ORTHOMCL10846	ORTHOMCL10491	ORTHOMCL10456	ORTHOMCL5088	ORTHOMCL5088	ORTHOMCL6312	ORTHOMCL10990	ORTHOMCL5507	ORTHOMCL5314	ORTHOMCL8438
ORTHOMCL6824	ORTHOMCL7154	ORTHOMCL4933	ORTHOMCL7994	ORTHOMCL10820	ORTHOMCL5149	ORTHOMCL9604	ORTHOMCL6652	ORTHOMCL5982	ORTHOMCL10906	ORTHOMCL5310
ORTHOMCL8564	ORTHOMCL10599	ORTHOMCL10323	ORTHOMCL10731	ORTHOMCL10728	ORTHOMCL7475	ORTHOMCL10678	ORTHOMCL8438	ORTHOMCL6234	ORTHOMCL5088	ORTHOMCL5572
ORTHOMCL6401	ORTHOMCL4933	ORTHOMCL8374	ORTHOMCL7771	ORTHOMCL4933	ORTHOMCL10491	ORTHOMCL5507	ORTHOMCL5310	ORTHOMCL5368	ORTHOMCL7475	ORTHOMCL8564
ORTHOMCL7611	ORTHOMCL5253	ORTHOMCL4725	ORTHOMCL4759	ORTHOMCL10323	ORTHOMCL4933	ORTHOMCL5982	ORTHOMCL5572	ORTHOMCL7569	ORTHOMCL10491	ORTHOMCL6395
ORTHOMCL8095	ORTHOMCL10323	ORTHOMCL10185	ORTHOMCL5314	ORTHOMCL8374	ORTHOMCL4835	ORTHOMCL5412	ORTHOMCL8564	ORTHOMCL10108	ORTHOMCL4933	ORTHOMCL6401
ORTHOMCL10757	ORTHOMCL8374	ORTHOMCL6312	ORTHOMCL10906	ORTHOMCL4725	ORTHOMCL8374	ORTHOMCL7032	ORTHOMCL6401	ORTHOMCL5450	ORTHOMCL10323	ORTHOMCL6814
ORTHOMCL10891	ORTHOMCL4725	ORTHOMCL9604	ORTHOMCL5088	ORTHOMCL10185	ORTHOMCL10185	ORTHOMCL5368	ORTHOMCL6814	ORTHOMCL7580	ORTHOMCL8374	ORTHOMCL10072
ORTHOMCL7263	ORTHOMCL10185	ORTHOMCL10678	ORTHOMCL5149	ORTHOMCL6312	ORTHOMCL6312	ORTHOMCL10108	ORTHOMCL10072	ORTHOMCL4616	ORTHOMCL4725	ORTHOMCL8095
ORTHOMCL5466	ORTHOMCL6312	ORTHOMCL5982	ORTHOMCL7475	ORTHOMCL9604	ORTHOMCL9604	ORTHOMCL5450	ORTHOMCL8095	ORTHOMCL6189	ORTHOMCL10185	ORTHOMCL4824
ORTHOMCL6899	ORTHOMCL10678	ORTHOMCL7032	ORTHOMCL10491	ORTHOMCL5982	ORTHOMCL5507	ORTHOMCL4616	ORTHOMCL10891	ORTHOMCL10990	ORTHOMCL6312	ORTHOMCL10891
ORTHOMCL9108	ORTHOMCL5550	ORTHOMCL5368	ORTHOMCL4933	ORTHOMCL7032	ORTHOMCL5982	ORTHOMCL6189	ORTHOMCL7263	ORTHOMCL8438	ORTHOMCL9604	ORTHOMCL7263
ORTHOMCL7398	ORTHOMCL5982	ORTHOMCL10108	ORTHOMCL10323	ORTHOMCL5368	ORTHOMCL7032	ORTHOMCL8438	ORTHOMCL6033	ORTHOMCL4939	ORTHOMCL5507	ORTHOMCL6033
ORTHOMCL8174	ORTHOMCL5368	ORTHOMCL5450	ORTHOMCL4835	ORTHOMCL10108	ORTHOMCL5368	ORTHOMCL4939	ORTHOMCL5466	ORTHOMCL5310	ORTHOMCL5982	ORTHOMCL5466
ORTHOMCL9689	ORTHOMCL10108	ORTHOMCL7580	ORTHOMCL8374	ORTHOMCL10652	ORTHOMCL10108	ORTHOMCL5310	ORTHOMCL7936	ORTHOMCL6868	ORTHOMCL10108	ORTHOMCL4416
ORTHOMCL6338	ORTHOMCL5450	ORTHOMCL4616	ORTHOMCL10185	ORTHOMCL7580	ORTHOMCL5450	ORTHOMCL5572	ORTHOMCL10514	ORTHOMCL5572	ORTHOMCL10652	ORTHOMCL8120
ORTHOMCL5991	ORTHOMCL7580	ORTHOMCL6189	ORTHOMCL6312	ORTHOMCL4616	ORTHOMCL7580	ORTHOMCL8564	ORTHOMCL8120	ORTHOMCL8564	ORTHOMCL7364	ORTHOMCL8690
ORTHOMCL6804	ORTHOMCL4616	ORTHOMCL10990	ORTHOMCL9604	ORTHOMCL10990	ORTHOMCL4616	ORTHOMCL6401	ORTHOMCL5991	ORTHOMCL10072	ORTHOMCL7580	ORTHOMCL10197
ORTHOMCL10197	ORTHOMCL4651	ORTHOMCL8438	ORTHOMCL5507	ORTHOMCL6652	ORTHOMCL6189	ORTHOMCL6814	ORTHOMCL10197	ORTHOMCL8095	ORTHOMCL4616	ORTHOMCL6349
ORTHOMCL7462	ORTHOMCL10990	ORTHOMCL4939	ORTHOMCL6224	ORTHOMCL8438	ORTHOMCL8438	ORTHOMCL10072	ORTHOMCL6349	ORTHOMCL4824	ORTHOMCL10990	ORTHOMCL7832
ORTHOMCL4960	ORTHOMCL6652	ORTHOMCL5310	ORTHOMCL5982	ORTHOMCL4939	ORTHOMCL4939	ORTHOMCL8095	ORTHOMCL7832	ORTHOMCL10891	ORTHOMCL8438	ORTHOMCL9702
ORTHOMCL8032	ORTHOMCL8438	ORTHOMCL5572	ORTHOMCL7032	ORTHOMCL5310	ORTHOMCL5310	ORTHOMCL4839	ORTHOMCL9702	ORTHOMCL7263	ORTHOMCL4939	ORTHOMCL8032
ORTHOMCL6241	ORTHOMCL4939	ORTHOMCL8564	ORTHOMCL5368	ORTHOMCL5572	ORTHOMCL5572	ORTHOMCL10891	ORTHOMCL8032	ORTHOMCL6033	ORTHOMCL5310	ORTHOMCL6241
ORTHOMCL10398	ORTHOMCL5310	ORTHOMCL6401	ORTHOMCL10108	ORTHOMCL8564	ORTHOMCL8564	ORTHOMCL7263	ORTHOMCL10398	ORTHOMCL5466	ORTHOMCL5572	ORTHOMCL6147
ORTHOMCL10662	ORTHOMCL5572	ORTHOMCL6814	ORTHOMCL5450	ORTHOMCL6401	ORTHOMCL6401	ORTHOMCL6033	ORTHOMCL5832	ORTHOMCL7936	ORTHOMCL8564	ORTHOMCL10398
ORTHOMCL10230	ORTHOMCL6824	ORTHOMCL10072	ORTHOMCL7580	ORTHOMCL6814	ORTHOMCL6814	ORTHOMCL5466	ORTHOMCL9968	ORTHOMCL10514	ORTHOMCL6401	ORTHOMCL10662
ORTHOMCL5908	ORTHOMCL6401	ORTHOMCL8095	ORTHOMCL4616	ORTHOMCL4839	ORTHOMCL10072	ORTHOMCL10197	ORTHOMCL9920	ORTHOMCL4416	ORTHOMCL6814	ORTHOMCL5832
ORTHOMCL10193	ORTHOMCL6814	ORTHOMCL10891	ORTHOMCL8438	ORTHOMCL10891	ORTHOMCL8095	ORTHOMCL7832	ORTHOMCL6888	ORTHOMCL5991	ORTHOMCL10072	ORTHOMCL9968
ORTHOMCL10031	ORTHOMCL10757	ORTHOMCL7263	ORTHOMCL4939	ORTHOMCL6019	ORTHOMCL4839	ORTHOMCL9702	ORTHOMCL10031	ORTHOMCL10197	ORTHOMCL8095	ORTHOMCL6888
ORTHOMCL4932	ORTHOMCL10891	ORTHOMCL5466	ORTHOMCL5310	ORTHOMCL5466	ORTHOMCL10891	ORTHOMCL8032	ORTHOMCL6427	ORTHOMCL7832	ORTHOMCL4839	ORTHOMCL10031
ORTHOMCL7470	ORTHOMCL7263	ORTHOMCL4416	ORTHOMCL5572	ORTHOMCL4416	ORTHOMCL7263	ORTHOMCL6241	ORTHOMCL4932	ORTHOMCL9702	ORTHOMCL10891	ORTHOMCL4932
ORTHOMCL6030	ORTHOMCL5466	ORTHOMCL5347	ORTHOMCL6401	ORTHOMCL8120	ORTHOMCL6019	ORTHOMCL6147	ORTHOMCL7470	ORTHOMCL8032	ORTHOMCL7263	ORTHOMCL7470
ORTHOMCL5471	ORTHOMCL6899	ORTHOMCL5991	ORTHOMCL6814	ORTHOMCL6804	ORTHOMCL6033	ORTHOMCL10398	ORTHOMCL6750	ORTHOMCL8446	ORTHOMCL6019	ORTHOMCL6750
ORTHOMCL8418	ORTHOMCL5228	ORTHOMCL6804	ORTHOMCL10072	ORTHOMCL10197	ORTHOMCL5466	ORTHOMCL5832	ORTHOMCL9321	ORTHOMCL6241	ORTHOMCL6033	ORTHOMCL9321
ORTHOMCL5987	ORTHOMCL9588	ORTHOMCL10197	ORTHOMCL8095	ORTHOMCL6349	ORTHOMCL4416	ORTHOMCL6888	ORTHOMCL5987	ORTHOMCL10398	ORTHOMCL5466	ORTHOMCL8418
ORTHOMCL6053	ORTHOMCL9053	ORTHOMCL7832	ORTHOMCL4839	ORTHOMCL7832	ORTHOMCL5347	ORTHOMCL10193	ORTHOMCL6053	ORTHOMCL5832	ORTHOMCL7936	ORTHOMCL9277
ORTHOMCL7136	ORTHOMCL6338	ORTHOMCL9702	ORTHOMCL7747	ORTHOMCL9702	ORTHOMCL10197	ORTHOMCL10031	ORTHOMCL9277	ORTHOMCL9968	ORTHOMCL10514	ORTHOMCL8615
ORTHOMCL8145	ORTHOMCL5991	ORTHOMCL8032	ORTHOMCL10891	ORTHOMCL8032	ORTHOMCL7832	ORTHOMCL4932	ORTHOMCL7968	ORTHOMCL10193	ORTHOMCL4416	ORTHOMCL5186
ORTHOMCL5010	ORTHOMCL6804	ORTHOMCL6241	ORTHOMCL7263	ORTHOMCL10398	ORTHOMCL9702	ORTHOMCL7470	ORTHOMCL5186	ORTHOMCL10031	ORTHOMCL8120	ORTHOMCL10501
ORTHOMCL7818	ORTHOMCL7832	ORTHOMCL10398	ORTHOMCL6033	ORTHOMCL9968	ORTHOMCL8032	ORTHOMCL6750	ORTHOMCL10501	ORTHOMCL4932	ORTHOMCL10197	ORTHOMCL7252
ORTHOMCL6939	ORTHOMCL5454	ORTHOMCL5832	ORTHOMCL5466	ORTHOMCL10031	ORTHOMCL6241	ORTHOMCL5212	ORTHOMCL7252	ORTHOMCL7470	ORTHOMCL6349	ORTHOMCL4575
ORTHOMCL7537	ORTHOMCL7462	ORTHOMCL10193	ORTHOMCL10514	ORTHOMCL4932	ORTHOMCL6147	ORTHOMCL9321	ORTHOMCL4688	ORTHOMCL6750	ORTHOMCL7832	ORTHOMCL10556
ORTHOMCL8859	ORTHOMCL8032	ORTHOMCL10031	ORTHOMCL5228	ORTHOMCL7470	ORTHOMCL10398	ORTHOMCL8418	ORTHOMCL4575	ORTHOMCL5212	ORTHOMCL9702	ORTHOMCL8792
ORTHOMCL7252	ORTHOMCL8446	ORTHOMCL4932	ORTHOMCL8120	ORTHOMCL6750	ORTHOMCL8972	ORTHOMCL5987	ORTHOMCL8792	ORTHOMCL9321	ORTHOMCL8032	ORTHOMCL5824
ORTHOMCL4498	ORTHOMCL6147	ORTHOMCL7470	ORTHOMCL8690	ORTHOMCL8418	ORTHOMCL5832	ORTHOMCL9277	ORTHOMCL5824	ORTHOMCL8151	ORTHOMCL7739	ORTHOMCL8653
ORTHOMCL4575	ORTHOMCL10398	ORTHOMCL6750	ORTHOMCL5991	ORTHOMCL9277	ORTHOMCL9920	ORTHOMCL5186	ORTHOMCL8653	ORTHOMCL6053	ORTHOMCL8446	ORTHOMCL10915
ORTHOMCL8772	ORTHOMCL10662	ORTHOMCL5212	ORTHOMCL10197	ORTHOMCL7968	ORTHOMCL6888	ORTHOMCL10501	ORTHOMCL10915	ORTHOMCL9277	ORTHOMCL6147	ORTHOMCL10562
ORTHOMCL6618	ORTHOMCL5908	ORTHOMCL9321	ORTHOMCL7832	ORTHOMCL5186	ORTHOMCL10193	ORTHOMCL7252	ORTHOMCL10562	ORTHOMCL5010	ORTHOMCL10398	ORTHOMCL4459
ORTHOMCL8653	ORTHOMCL10031	ORTHOMCL8418	ORTHOMCL9702	ORTHOMCL10501	ORTHOMCL10031	ORTHOMCL4688	ORTHOMCL4712	ORTHOMCL5186	ORTHOMCL5832	ORTHOMCL4712
ORTHOMCL5914	ORTHOMCL4932	ORTHOMCL5987	ORTHOMCL8032	ORTHOMCL7252	ORTHOMCL4932	ORTHOMCL10556	ORTHOMCL10774	ORTHOMCL10501	ORTHOMCL9968	ORTHOMCL10774
ORTHOMCL9498	ORTHOMCL7470	ORTHOMCL7968	ORTHOMCL6241	ORTHOMCL4688	ORTHOMCL7470	ORTHOMCL5824	ORTHOMCL9605	ORTHOMCL7252	ORTHOMCL10031	ORTHOMCL9605
ORTHOMCL10562	ORTHOMCL6750	ORTHOMCL10501	ORTHOMCL10398	ORTHOMCL5824	ORTHOMCL6750	ORTHOMCL6801	ORTHOMCL10147	ORTHOMCL10556	ORTHOMCL4932	ORTHOMCL10147
ORTHOMCL10682	ORTHOMCL5212	ORTHOMCL7252	ORTHOMCL6888	ORTHOMCL8653	ORTHOMCL5212	ORTHOMCL8653	ORTHOMCL9621	ORTHOMCL8792	ORTHOMCL7470	ORTHOMCL5482
ORTHOMCL4459	ORTHOMCL6030	ORTHOMCL4688	ORTHOMCL10193	ORTHOMCL10915	ORTHOMCL5471	ORTHOMCL10915	ORTHOMCL5482	ORTHOMCL8653	ORTHOMCL6750	ORTHOMCL10124
ORTHOMCL10266	ORTHOMCL9321	ORTHOMCL10556	ORTHOMCL10031	ORTHOMCL9498	ORTHOMCL9321	ORTHOMCL9498	ORTHOMCL10124	ORTHOMCL10915	ORTHOMCL9321	ORTHOMCL6575
ORTHOMCL4712	ORTHOMCL9614	ORTHOMCL8792	ORTHOMCL4932	ORTHOMCL10562	ORTHOMCL8151	ORTHOMCL10562	ORTHOMCL6575	ORTHOMCL9498	ORTHOMCL8151	ORTHOMCL4515
ORTHOMCL10774	ORTHOMCL5987	ORTHOMCL5824	ORTHOMCL7470	ORTHOMCL4459	ORTHOMCL6268	ORTHOMCL4459	ORTHOMCL4515	ORTHOMCL10562	ORTHOMCL7968	ORTHOMCL6013
ORTHOMCL9605	ORTHOMCL6053	ORTHOMCL6801	ORTHOMCL6750	ORTHOMCL4712	ORTHOMCL9277	ORTHOMCL4712	ORTHOMCL7330	ORTHOMCL4712	ORTHOMCL10501	ORTHOMCL8393
ORTHOMCL10147	ORTHOMCL7136	ORTHOMCL8653	ORTHOMCL5212	ORTHOMCL10774	ORTHOMCL7968	ORTHOMCL9605	ORTHOMCL10881	ORTHOMCL10774	ORTHOMCL7252	ORTHOMCL10881
ORTHOMCL9621	ORTHOMCL6939	ORTHOMCL10915	ORTHOMCL9321	ORTHOMCL9605	ORTHOMCL5186	ORTHOMCL10147	ORTHOMCL6906	ORTHOMCL9605	ORTHOMCL4688	ORTHOMCL6906
ORTHOMCL5482	ORTHOMCL7968	ORTHOMCL9498	ORTHOMCL8418	ORTHOMCL10147	ORTHOMCL10501	ORTHOMCL9621	ORTHOMCL5336	ORTHOMCL10147	ORTHOMCL10556	ORTHOMCL5338
ORTHOMCL10124	ORTHOMCL8859	ORTHOMCL10562	ORTHOMCL8615	ORTHOMCL9621	ORTHOMCL7252	ORTHOMCL5482	ORTHOMCL5767	ORTHOMCL5482	ORTHOMCL8792	ORTHOMCL5336
ORTHOMCL7004	ORTHOMCL7252	ORTHOMCL4459	ORTHOMCL5186	ORTHOMCL5482	ORTHOMCL4688	ORTHOMCL10124	ORTHOMCL6696	ORTHOMCL10124	ORTHOMCL8653	ORTHOMCL5767
ORTHOMCL6013	ORTHOMCL4575	ORTHOMCL4712	ORTHOMCL10501	ORTHOMCL4515	ORTHOMCL10556	ORTHOMCL6575	ORTHOMCL4982	ORTHOMCL4515	ORTHOMCL10915	ORTHOMCL6696
ORTHOMCL10881	ORTHOMCL8772	ORTHOMCL10774	ORTHOMCL7252	ORTHOMCL8856	ORTHOMCL8792	ORTHOMCL4515	ORTHOMCL9382	ORTHOMCL10881	ORTHOMCL9498	ORTHOMCL4982
ORTHOMCL6906	ORTHOMCL8792	ORTHOMCL9605	ORTHOMCL9132	ORTHOMCL7330	ORTHOMCL6801	ORTHOMCL8393	ORTHOMCL5508	ORTHOMCL6906	ORTHOMCL10562	ORTHOMCL5510
ORTHOMCL5338	ORTHOMCL9269	ORTHOMCL10147	ORTHOMCL4498	ORTHOMCL10881	ORTHOMCL8653	ORTHOMCL9895	ORTHOMCL4657	ORTHOMCL5338	ORTHOMCL4712	ORTHOMCL5508
ORTHOMCL5750	ORTHOMCL8953	ORTHOMCL5482	ORTHOMCL10556	ORTHOMCL6906	ORTHOMCL10915	ORTHOMCL6906	ORTHOMCL8655	ORTHOMCL5336	ORTHOMCL10774	ORTHOMCL4657
ORTHOMCL5767	ORTHOMCL8653	ORTHOMCL6575	ORTHOMCL8792	ORTHOMCL5338	ORTHOMCL9498	ORTHOMCL5338	ORTHOMCL4727	ORTHOMCL5767	ORTHOMCL10147	ORTHOMCL8655
ORTHOMCL4982	ORTHOMCL9498	ORTHOMCL4515	ORTHOMCL5824	ORTHOMCL5750	ORTHOMCL10562	ORTHOMCL5767	ORTHOMCL4440	ORTHOMCL6696	ORTHOMCL5482	ORTHOMCL4727
ORTHOMCL5508	ORTHOMCL4459	ORTHOMCL8393	ORTHOMCL6801	ORTHOMCL5058	ORTHOMCL4459	ORTHOMCL6696	ORTHOMCL6896	ORTHOMCL4982	ORTHOMCL10124	ORTHOMCL4440
ORTHOMCL4657	ORTHOMCL4712	ORTHOMCL9895	ORTHOMCL8653	ORTHOMCL5767	ORTHOMCL10266	ORTHOMCL4982	ORTHOMCL8864	ORTHOMCL5508	ORTHOMCL6575	ORTHOMCL6989
ORTHOMCL8655	ORTHOMCL9605	ORTHOMCL10881	ORTHOMCL10915	ORTHOMCL4982	ORTHOMCL4712	ORTHOMCL9382	ORTHOMCL4761	ORTHOMCL8655	ORTHOMCL4515	ORTHOMCL8864
ORTHOMCL6320	ORTHOMCL9621	ORTHOMCL6906	ORTHOMCL9498	ORTHOMCL5510	ORTHOMCL10774	ORTHOMCL8655	ORTHOMCL8605	ORTHOMCL4727	ORTHOMCL8346	ORTHOMCL4761
ORTHOMCL4440	ORTHOMCL5482	ORTHOMCL5338	ORTHOMCL10562	ORTHOMCL5508	ORTHOMCL9605	ORTHOMCL4727	ORTHOMCL5217	ORTHOMCL6896	ORTHOMCL6013	ORTHOMCL8689
ORTHOMCL4761	ORTHOMCL10124	ORTHOMCL5336	ORTHOMCL4459	ORTHOMCL4657	ORTHOMCL10147	ORTHOMCL4440	ORTHOMCL5780	ORTHOMCL10274	ORTHOMCL8856	ORTHOMCL5217
ORTHOMCL8605	ORTHOMCL4515	ORTHOMCL5767	ORTHOMCL4712	ORTHOMCL6896	ORTHOMCL9621	ORTHOMCL6896	ORTHOMCL9476	ORTHOMCL6989	ORTHOMCL7330	ORTHOMCL5780
ORTHOMCL5217	ORTHOMCL7004	ORTHOMCL6696	ORTHOMCL10774	ORTHOMCL6989	ORTHOMCL5482	ORTHOMCL8864	ORTHOMCL4744	ORTHOMCL7404	ORTHOMCL10881	ORTHOMCL6682
ORTHOMCL5780	ORTHOMCL6013	ORTHOMCL4982	ORTHOMCL9605	ORTHOMCL4807	ORTHOMCL6575	ORTHOMCL4761	ORTHOMCL9867	ORTHOMCL8864	ORTHOMCL6906	ORTHOMCL9476
ORTHOMCL9766	ORTHOMCL8498	ORTHOMCL9382	ORTHOMCL10147	ORTHOMCL4761	ORTHOMCL4515	ORTHOMCL5217	ORTHOMCL9339	ORTHOMCL4761	ORTHOMCL5338	ORTHOMCL4723
ORTHOMCL4744	ORTHOMCL9952	ORTHOMCL5508	ORTHOMCL9621	ORTHOMCL5217	ORTHOMCL8393	ORTHOMCL5780	ORTHOMCL10260	ORTHOMCL5217	ORTHOMCL5750	ORTHOMCL5571
ORTHOMCL8860	ORTHOMCL7330	ORTHOMCL8655	ORTHOMCL5482	ORTHOMCL6748	ORTHOMCL9895	ORTHOMCL4466	ORTHOMCL7888	ORTHOMCL5780	ORTHOMCL5767	ORTHOMCL9339
ORTHOMCL6094	ORTHOMCL10881	ORTHOMCL4727	ORTHOMCL6575	ORTHOMCL5780	ORTHOMCL10881	ORTHOMCL9476	ORTHOMCL10719	ORTHOMCL4466	ORTHOMCL6696	ORTHOMCL10260
ORTHOMCL4723	ORTHOMCL5338	ORTHOMCL4440	ORTHOMCL4515	ORTHOMCL9766	ORTHOMCL6906	ORTHOMCL4744	ORTHOMCL7217	ORTHOMCL9476	ORTHOMCL8831	ORTHOMCL7888
ORTHOMCL6157	ORTHOMCL5336	ORTHOMCL6989	ORTHOMCL6013	ORTHOMCL4466	ORTHOMCL5058	ORTHOMCL4723	ORTHOMCL4902	ORTHOMCL4744	ORTHOMCL4982	ORTHOMCL10719
ORTHOMCL6212	ORTHOMCL7595	ORTHOMCL8864	ORTHOMCL9895	ORTHOMCL9476	ORTHOMCL5767	ORTHOMCL5571	ORTHOMCL6966	ORTHOMCL4723	ORTHOMCL4657	ORTHOMCL7217
ORTHOMCL4838	ORTHOMCL5058	ORTHOMCL4761	ORTHOMCL10881	ORTHOMCL8293	ORTHOMCL6696	ORTHOMCL4838	ORTHOMCL5302	ORTHOMCL5571	ORTHOMCL8655	ORTHOMCL6966
ORTHOMCL10260	ORTHOMCL8932	ORTHOMCL8689	ORTHOMCL6906	ORTHOMCL5571	ORTHOMCL4982	ORTHOMCL9339	ORTHOMCL9843	ORTHOMCL9339	ORTHOMCL6896	ORTHOMCL5079
ORTHOMCL7888	ORTHOMCL4982	ORTHOMCL5217	ORTHOMCL5338	ORTHOMCL5273	ORTHOMCL9382	ORTHOMCL10260	ORTHOMCL4570	ORTHOMCL10260	ORTHOMCL10274	ORTHOMCL9843
ORTHOMCL10719	ORTHOMCL6993	ORTHOMCL9790	ORTHOMCL5767	ORTHOMCL8344	ORTHOMCL5508	ORTHOMCL6375	ORTHOMCL10572	ORTHOMCL6375	ORTHOMCL7404	ORTHOMCL4587
ORTHOMCL5922	ORTHOMCL5508	ORTHOMCL5780	ORTHOMCL6696	ORTHOMCL10260	ORTHOMCL4657	ORTHOMCL7888	ORTHOMCL9121	ORTHOMCL7888	ORTHOMCL8864	ORTHOMCL10572
ORTHOMCL4664	ORTHOMCL4657	ORTHOMCL4466	ORTHOMCL8831	ORTHOMCL7888	ORTHOMCL8655	ORTHOMCL10719	ORTHOMCL10411	ORTHOMCL10719	ORTHOMCL4761	ORTHOMCL9121
ORTHOMCL6966	ORTHOMCL8655	ORTHOMCL9476	ORTHOMCL4982	ORTHOMCL7217	ORTHOMCL4727	ORTHOMCL7217	ORTHOMCL4796	ORTHOMCL7217	ORTHOMCL8689	ORTHOMCL5447
ORTHOMCL5079	ORTHOMCL10773	ORTHOMCL4744	ORTHOMCL9382	ORTHOMCL8877	ORTHOMCL8376	ORTHOMCL6966	ORTHOMCL5434	ORTHOMCL4902	ORTHOMCL5780	ORTHOMCL10411
ORTHOMCL4768	ORTHOMCL7509	ORTHOMCL9339	ORTHOMCL5508	ORTHOMCL6966	ORTHOMCL4440	ORTHOMCL5302	ORTHOMCL6749	ORTHOMCL6966	ORTHOMCL9476	ORTHOMCL4796
ORTHOMCL4587	ORTHOMCL8605	ORTHOMCL10260	ORTHOMCL4657	ORTHOMCL5079	ORTHOMCL6896	ORTHOMCL4768	ORTHOMCL7846	ORTHOMCL5079	ORTHOMCL4744	ORTHOMCL5434
ORTHOMCL5222	ORTHOMCL5217	ORTHOMCL6375	ORTHOMCL8655	ORTHOMCL9843	ORTHOMCL6989	ORTHOMCL9843	ORTHOMCL4713	ORTHOMCL9843	ORTHOMCL6094	ORTHOMCL7846
ORTHOMCL4570	ORTHOMCL5780	ORTHOMCL10719	ORTHOMCL4727	ORTHOMCL4587	ORTHOMCL8864	ORTHOMCL4587	ORTHOMCL8405	ORTHOMCL4587	ORTHOMCL4723	ORTHOMCL4713
ORTHOMCL9121	ORTHOMCL9039	ORTHOMCL7217	ORTHOMCL6989	ORTHOMCL4570	ORTHOMCL4761	ORTHOMCL10572	ORTHOMCL5381	ORTHOMCL4570	ORTHOMCL8344	ORTHOMCL8405
ORTHOMCL10411	ORTHOMCL4744	ORTHOMCL5302	ORTHOMCL8864	ORTHOMCL4483	ORTHOMCL8605	ORTHOMCL9121	ORTHOMCL5915	ORTHOMCL4483	ORTHOMCL9339	ORTHOMCL5381
ORTHOMCL4796	ORTHOMCL9136	ORTHOMCL5079	ORTHOMCL4761	ORTHOMCL10572	ORTHOMCL5217	ORTHOMCL5997	ORTHOMCL7333	ORTHOMCL10572	ORTHOMCL10260	ORTHOMCL5915
ORTHOMCL5434	ORTHOMCL6157	ORTHOMCL4768	ORTHOMCL5217	ORTHOMCL9121	ORTHOMCL5780	ORTHOMCL10411	ORTHOMCL9670	ORTHOMCL9121	ORTHOMCL7888	ORTHOMCL10388
ORTHOMCL7742	ORTHOMCL5273	ORTHOMCL9843	ORTHOMCL5780	ORTHOMCL5447	ORTHOMCL10076	ORTHOMCL4796	ORTHOMCL6474	ORTHOMCL4796	ORTHOMCL10719	ORTHOMCL8226
ORTHOMCL4979	ORTHOMCL9339	ORTHOMCL10572	ORTHOMCL6682	ORTHOMCL10411	ORTHOMCL4466	ORTHOMCL6749	ORTHOMCL10388	ORTHOMCL5434	ORTHOMCL7217	ORTHOMCL7280
ORTHOMCL6749	ORTHOMCL10260	ORTHOMCL9121	ORTHOMCL9476	ORTHOMCL4796	ORTHOMCL9476	ORTHOMCL4713	ORTHOMCL8226	ORTHOMCL6749	ORTHOMCL4902	ORTHOMCL9565
ORTHOMCL8401	ORTHOMCL7888	ORTHOMCL10411	ORTHOMCL4744	ORTHOMCL5434	ORTHOMCL4744	ORTHOMCL7461	ORTHOMCL7280	ORTHOMCL7846	ORTHOMCL6966	ORTHOMCL6315
ORTHOMCL8715	ORTHOMCL10719	ORTHOMCL4796	ORTHOMCL5571	ORTHOMCL7846	ORTHOMCL4723	ORTHOMCL8405	ORTHOMCL4691	ORTHOMCL8401	ORTHOMCL4768	ORTHOMCL4789
ORTHOMCL4713	ORTHOMCL8877	ORTHOMCL5434	ORTHOMCL8344	ORTHOMCL4713	ORTHOMCL9339	ORTHOMCL5381	ORTHOMCL6315	ORTHOMCL4713	ORTHOMCL9843	ORTHOMCL8192
ORTHOMCL10503	ORTHOMCL4664	ORTHOMCL6749	ORTHOMCL9339	ORTHOMCL8405	ORTHOMCL10260	ORTHOMCL5915	ORTHOMCL4789	ORTHOMCL8405	ORTHOMCL4587	ORTHOMCL6057
ORTHOMCL8405	ORTHOMCL8011	ORTHOMCL8401	ORTHOMCL10260	ORTHOMCL5381	ORTHOMCL6375	ORTHOMCL7333	ORTHOMCL8192	ORTHOMCL5381	ORTHOMCL4570	ORTHOMCL9965
ORTHOMCL5915	ORTHOMCL6966	ORTHOMCL4713	ORTHOMCL6375	ORTHOMCL5915	ORTHOMCL7888	ORTHOMCL6474	ORTHOMCL7011	ORTHOMCL5915	ORTHOMCL10572	ORTHOMCL4553
ORTHOMCL7333	ORTHOMCL8018	ORTHOMCL5381	ORTHOMCL7888	ORTHOMCL10388	ORTHOMCL10719	ORTHOMCL10388	ORTHOMCL6057	ORTHOMCL10388	ORTHOMCL9121	ORTHOMCL7661
ORTHOMCL10388	ORTHOMCL8766	ORTHOMCL5915	ORTHOMCL7217	ORTHOMCL7280	ORTHOMCL7217	ORTHOMCL8226	ORTHOMCL9965	ORTHOMCL8226	ORTHOMCL10411	ORTHOMCL6065
ORTHOMCL8226	ORTHOMCL8223	ORTHOMCL7333	ORTHOMCL7204	ORTHOMCL9565	ORTHOMCL7204	ORTHOMCL7280	ORTHOMCL6065	ORTHOMCL7280	ORTHOMCL4796	ORTHOMCL8578
ORTHOMCL10354	ORTHOMCL5295	ORTHOMCL10388	ORTHOMCL6966	ORTHOMCL6315	ORTHOMCL6966	ORTHOMCL4691	ORTHOMCL10071	ORTHOMCL9565	ORTHOMCL5434	ORTHOMCL10980
ORTHOMCL9565	ORTHOMCL4768	ORTHOMCL8226	ORTHOMCL5302	ORTHOMCL9892	ORTHOMCL5302	ORTHOMCL9565	ORTHOMCL8578	ORTHOMCL4789	ORTHOMCL6749	ORTHOMCL8649
ORTHOMCL8192	ORTHOMCL10572	ORTHOMCL7280	ORTHOMCL9368	ORTHOMCL4802	ORTHOMCL9368	ORTHOMCL6315	ORTHOMCL10980	ORTHOMCL8192	ORTHOMCL7846	ORTHOMCL9686
ORTHOMCL7011	ORTHOMCL5997	ORTHOMCL9565	ORTHOMCL4768	ORTHOMCL8192	ORTHOMCL4768	ORTHOMCL4789	ORTHOMCL8649	ORTHOMCL6057	ORTHOMCL8401	ORTHOMCL4426
ORTHOMCL6057	ORTHOMCL10411	ORTHOMCL6315	ORTHOMCL9843	ORTHOMCL7011	ORTHOMCL9843	ORTHOMCL8192	ORTHOMCL9686	ORTHOMCL9965	ORTHOMCL4713	ORTHOMCL4792
ORTHOMCL4779	ORTHOMCL4796	ORTHOMCL4789	ORTHOMCL4587	ORTHOMCL6057	ORTHOMCL4587	ORTHOMCL6057	ORTHOMCL4792	ORTHOMCL4553	ORTHOMCL8405	ORTHOMCL7068
ORTHOMCL6065	ORTHOMCL4888	ORTHOMCL4802	ORTHOMCL4483	ORTHOMCL6065	ORTHOMCL4483	ORTHOMCL4553	ORTHOMCL7068	ORTHOMCL6065	ORTHOMCL5381	ORTHOMCL4476
ORTHOMCL8578	ORTHOMCL5434	ORTHOMCL8192	ORTHOMCL9121	ORTHOMCL10071	ORTHOMCL10572	ORTHOMCL7661	ORTHOMCL4476	ORTHOMCL8578	ORTHOMCL5915	ORTHOMCL9653
ORTHOMCL10980	ORTHOMCL6749	ORTHOMCL6057	ORTHOMCL4388	ORTHOMCL10980	ORTHOMCL9121	ORTHOMCL4779	ORTHOMCL9653	ORTHOMCL10980	ORTHOMCL7333	ORTHOMCL4918
ORTHOMCL9686	ORTHOMCL7846	ORTHOMCL4553	ORTHOMCL10411	ORTHOMCL9686	ORTHOMCL5997	ORTHOMCL6065	ORTHOMCL4918	ORTHOMCL8649	ORTHOMCL6474	ORTHOMCL10651
ORTHOMCL9915	ORTHOMCL4713	ORTHOMCL7661	ORTHOMCL4796	ORTHOMCL4792	ORTHOMCL10411	ORTHOMCL8578	ORTHOMCL9721	ORTHOMCL9686	ORTHOMCL10388	ORTHOMCL9721
ORTHOMCL4792	ORTHOMCL7461	ORTHOMCL4779	ORTHOMCL6086	ORTHOMCL7068	ORTHOMCL4796	ORTHOMCL10980	ORTHOMCL4396	ORTHOMCL4792	ORTHOMCL8226	ORTHOMCL8397
ORTHOMCL10300	ORTHOMCL8405	ORTHOMCL6065	ORTHOMCL5434	ORTHOMCL4476	ORTHOMCL6086	ORTHOMCL8649	ORTHOMCL8439	ORTHOMCL7068	ORTHOMCL7280	ORTHOMCL8439
ORTHOMCL7068	ORTHOMCL5381	ORTHOMCL8578	ORTHOMCL6749	ORTHOMCL4918	ORTHOMCL5434	ORTHOMCL9686	ORTHOMCL7862	ORTHOMCL4476	ORTHOMCL9565	ORTHOMCL7862
ORTHOMCL4476	ORTHOMCL7333	ORTHOMCL10980	ORTHOMCL7846	ORTHOMCL9721	ORTHOMCL4979	ORTHOMCL4426	ORTHOMCL10468	ORTHOMCL9653	ORTHOMCL4789	ORTHOMCL10468
ORTHOMCL4918	ORTHOMCL10388	ORTHOMCL8649	ORTHOMCL8401	ORTHOMCL5227	ORTHOMCL7846	ORTHOMCL4792	ORTHOMCL8135	ORTHOMCL7883	ORTHOMCL7011	ORTHOMCL8135
ORTHOMCL10651	ORTHOMCL8226	ORTHOMCL9686	ORTHOMCL4713	ORTHOMCL8397	ORTHOMCL4713	ORTHOMCL7068	ORTHOMCL10244	ORTHOMCL4918	ORTHOMCL6057	ORTHOMCL10244
ORTHOMCL9721	ORTHOMCL10354	ORTHOMCL9915	ORTHOMCL5381	ORTHOMCL7359	ORTHOMCL7461	ORTHOMCL4476	ORTHOMCL6397	ORTHOMCL10651	ORTHOMCL9965	ORTHOMCL6418
ORTHOMCL8397	ORTHOMCL4691	ORTHOMCL4792	ORTHOMCL5915	ORTHOMCL4396	ORTHOMCL5381	ORTHOMCL9653	ORTHOMCL4845	ORTHOMCL9721	ORTHOMCL4553	ORTHOMCL4845
ORTHOMCL9336	ORTHOMCL9394	ORTHOMCL7068	ORTHOMCL7333	ORTHOMCL8439	ORTHOMCL5915	ORTHOMCL7883	ORTHOMCL5626	ORTHOMCL8397	ORTHOMCL7661	ORTHOMCL5626
ORTHOMCL7395	ORTHOMCL4789	ORTHOMCL4476	ORTHOMCL9670	ORTHOMCL7862	ORTHOMCL10388	ORTHOMCL4918	ORTHOMCL5297	ORTHOMCL4396	ORTHOMCL4779	ORTHOMCL5297
ORTHOMCL8439	ORTHOMCL8192	ORTHOMCL9653	ORTHOMCL6474	ORTHOMCL10468	ORTHOMCL8226	ORTHOMCL10651	ORTHOMCL5193	ORTHOMCL8439	ORTHOMCL6065	ORTHOMCL9655
ORTHOMCL7862	ORTHOMCL4779	ORTHOMCL4918	ORTHOMCL10388	ORTHOMCL10244	ORTHOMCL7280	ORTHOMCL9721	ORTHOMCL6138	ORTHOMCL7862	ORTHOMCL10071	ORTHOMCL5193
ORTHOMCL6644	ORTHOMCL6065	ORTHOMCL10651	ORTHOMCL8226	ORTHOMCL6397	ORTHOMCL6315	ORTHOMCL8397	ORTHOMCL9249	ORTHOMCL10468	ORTHOMCL8578	ORTHOMCL6138
ORTHOMCL8135	ORTHOMCL10071	ORTHOMCL9721	ORTHOMCL7280	ORTHOMCL6418	ORTHOMCL4789	ORTHOMCL7359	ORTHOMCL10018	ORTHOMCL8135	ORTHOMCL10980	ORTHOMCL9249
ORTHOMCL4456	ORTHOMCL10980	ORTHOMCL4396	ORTHOMCL6315	ORTHOMCL4845	ORTHOMCL4802	ORTHOMCL4396	ORTHOMCL5126	ORTHOMCL10244	ORTHOMCL8649	ORTHOMCL10195
ORTHOMCL10244	ORTHOMCL9915	ORTHOMCL8439	ORTHOMCL4789	ORTHOMCL5626	ORTHOMCL8192	ORTHOMCL8439	ORTHOMCL8668	ORTHOMCL4845	ORTHOMCL9686	ORTHOMCL8251
ORTHOMCL5297	ORTHOMCL4792	ORTHOMCL10468	ORTHOMCL4802	ORTHOMCL5297	ORTHOMCL6057	ORTHOMCL10468	ORTHOMCL8251	ORTHOMCL5626	ORTHOMCL4792	ORTHOMCL7848
ORTHOMCL5193	ORTHOMCL10300	ORTHOMCL8135	ORTHOMCL6057	ORTHOMCL5545	ORTHOMCL7661	ORTHOMCL8135	ORTHOMCL7848	ORTHOMCL5297	ORTHOMCL10300	ORTHOMCL5890
ORTHOMCL6563	ORTHOMCL7068	ORTHOMCL10244	ORTHOMCL4553	ORTHOMCL9655	ORTHOMCL4779	ORTHOMCL10244	ORTHOMCL6462	ORTHOMCL5545	ORTHOMCL7068	ORTHOMCL6347
ORTHOMCL10122	ORTHOMCL4918	ORTHOMCL5626	ORTHOMCL4779	ORTHOMCL5193	ORTHOMCL6065	ORTHOMCL8465	ORTHOMCL7215	ORTHOMCL9655	ORTHOMCL4476	ORTHOMCL10327
ORTHOMCL5126	ORTHOMCL9721	ORTHOMCL5297	ORTHOMCL6065	ORTHOMCL9249	ORTHOMCL8578	ORTHOMCL6418	ORTHOMCL6347	ORTHOMCL5193	ORTHOMCL9653	ORTHOMCL7989
ORTHOMCL6538	ORTHOMCL8999	ORTHOMCL9655	ORTHOMCL10071	ORTHOMCL5126	ORTHOMCL10980	ORTHOMCL5626	ORTHOMCL10327	ORTHOMCL9249	ORTHOMCL4918	ORTHOMCL5894
ORTHOMCL8668	ORTHOMCL6450	ORTHOMCL9249	ORTHOMCL8578	ORTHOMCL6538	ORTHOMCL8649	ORTHOMCL9971	ORTHOMCL7989	ORTHOMCL10018	ORTHOMCL10651	ORTHOMCL7390
ORTHOMCL10218	ORTHOMCL9336	ORTHOMCL8251	ORTHOMCL10980	ORTHOMCL6462	ORTHOMCL9686	ORTHOMCL5297	ORTHOMCL7390	ORTHOMCL5126	ORTHOMCL9721	ORTHOMCL8477
ORTHOMCL7886	ORTHOMCL7359	ORTHOMCL7848	ORTHOMCL8649	ORTHOMCL6347	ORTHOMCL4426	ORTHOMCL5545	ORTHOMCL8477	ORTHOMCL7848	ORTHOMCL4396	ORTHOMCL9560
ORTHOMCL5890	ORTHOMCL7395	ORTHOMCL5890	ORTHOMCL9686	ORTHOMCL10327	ORTHOMCL4792	ORTHOMCL9655	ORTHOMCL9560	ORTHOMCL5890	ORTHOMCL8439	ORTHOMCL7278
ORTHOMCL6462	ORTHOMCL4396	ORTHOMCL6462	ORTHOMCL4792	ORTHOMCL7989	ORTHOMCL7068	ORTHOMCL5193	ORTHOMCL7278	ORTHOMCL6289	ORTHOMCL7862	ORTHOMCL7891
ORTHOMCL10772	ORTHOMCL8439	ORTHOMCL6347	ORTHOMCL7068	ORTHOMCL4884	ORTHOMCL4476	ORTHOMCL6138	ORTHOMCL6973	ORTHOMCL6462	ORTHOMCL10468	ORTHOMCL5857
ORTHOMCL10674	ORTHOMCL10423	ORTHOMCL10327	ORTHOMCL4476	ORTHOMCL8477	ORTHOMCL9653	ORTHOMCL9249	ORTHOMCL7891	ORTHOMCL7215	ORTHOMCL8135	ORTHOMCL5274
ORTHOMCL8518	ORTHOMCL10468	ORTHOMCL5894	ORTHOMCL9653	ORTHOMCL9560	ORTHOMCL10524	ORTHOMCL10195	ORTHOMCL5857	ORTHOMCL6347	ORTHOMCL10244	ORTHOMCL8810
ORTHOMCL8477	ORTHOMCL8135	ORTHOMCL4884	ORTHOMCL4918	ORTHOMCL7278	ORTHOMCL4918	ORTHOMCL7848	ORTHOMCL5274	ORTHOMCL10327	ORTHOMCL6418	ORTHOMCL6093
ORTHOMCL7278	ORTHOMCL10244	ORTHOMCL7390	ORTHOMCL9721	ORTHOMCL6973	ORTHOMCL10651	ORTHOMCL6289	ORTHOMCL8810	ORTHOMCL7989	ORTHOMCL4845	ORTHOMCL9181
ORTHOMCL5214	ORTHOMCL6418	ORTHOMCL8322	ORTHOMCL6450	ORTHOMCL5864	ORTHOMCL9721	ORTHOMCL6462	ORTHOMCL8608	ORTHOMCL5894	ORTHOMCL5626	ORTHOMCL10338
ORTHOMCL7891	ORTHOMCL4845	ORTHOMCL8477	ORTHOMCL8397	ORTHOMCL5857	ORTHOMCL6450	ORTHOMCL9855	ORTHOMCL6093	ORTHOMCL7390	ORTHOMCL5297	ORTHOMCL4854
ORTHOMCL5857	ORTHOMCL5297	ORTHOMCL9560	ORTHOMCL7359	ORTHOMCL9546	ORTHOMCL8397	ORTHOMCL6347	ORTHOMCL10338	ORTHOMCL9560	ORTHOMCL5545	ORTHOMCL10853
ORTHOMCL5274	ORTHOMCL5545	ORTHOMCL7278	ORTHOMCL8439	ORTHOMCL5274	ORTHOMCL7359	ORTHOMCL10327	ORTHOMCL10853	ORTHOMCL7278	ORTHOMCL9655	ORTHOMCL5158
ORTHOMCL4854	ORTHOMCL9655	ORTHOMCL7891	ORTHOMCL7862	ORTHOMCL8810	ORTHOMCL4396	ORTHOMCL7989	ORTHOMCL8206	ORTHOMCL7891	ORTHOMCL5193	ORTHOMCL5289
ORTHOMCL5640	ORTHOMCL5193	ORTHOMCL5857	ORTHOMCL10468	ORTHOMCL6093	ORTHOMCL8439	ORTHOMCL5894	ORTHOMCL5640	ORTHOMCL5857	ORTHOMCL9249	ORTHOMCL5640
ORTHOMCL6707	ORTHOMCL6138	ORTHOMCL5274	ORTHOMCL8135	ORTHOMCL4854	ORTHOMCL10468	ORTHOMCL7390	ORTHOMCL8461	ORTHOMCL5274	ORTHOMCL6003	ORTHOMCL8461
ORTHOMCL8461	ORTHOMCL9249	ORTHOMCL8810	ORTHOMCL10244	ORTHOMCL10853	ORTHOMCL8135	ORTHOMCL8477	ORTHOMCL10863	ORTHOMCL8810	ORTHOMCL6289	ORTHOMCL10863
ORTHOMCL9793	ORTHOMCL8501	ORTHOMCL6093	ORTHOMCL8465	ORTHOMCL8206	ORTHOMCL10244	ORTHOMCL9560	ORTHOMCL5718	ORTHOMCL8608	ORTHOMCL6462	ORTHOMCL5718
ORTHOMCL10863	ORTHOMCL8668	ORTHOMCL10338	ORTHOMCL6418	ORTHOMCL5289	ORTHOMCL8465	ORTHOMCL7278	ORTHOMCL5078	ORTHOMCL6093	ORTHOMCL6347	ORTHOMCL5078
ORTHOMCL5718	ORTHOMCL10396	ORTHOMCL10853	ORTHOMCL5626	ORTHOMCL5640	ORTHOMCL5297	ORTHOMCL5857	ORTHOMCL10870	ORTHOMCL4854	ORTHOMCL10327	ORTHOMCL10870
ORTHOMCL7114	ORTHOMCL7886	ORTHOMCL5158	ORTHOMCL9971	ORTHOMCL8461	ORTHOMCL9655	ORTHOMCL5274	ORTHOMCL10126	ORTHOMCL10853	ORTHOMCL7989	ORTHOMCL10126
ORTHOMCL10776	ORTHOMCL7215	ORTHOMCL5289	ORTHOMCL5297	ORTHOMCL10863	ORTHOMCL6138	ORTHOMCL8810	ORTHOMCL8315	ORTHOMCL8206	ORTHOMCL4884	ORTHOMCL8315
ORTHOMCL10126	ORTHOMCL6347	ORTHOMCL5640	ORTHOMCL5545	ORTHOMCL5718	ORTHOMCL9249	ORTHOMCL6093	ORTHOMCL10227	ORTHOMCL5176	ORTHOMCL7390	ORTHOMCL10227
ORTHOMCL10227	ORTHOMCL5894	ORTHOMCL8461	ORTHOMCL9655	ORTHOMCL5078	ORTHOMCL5126	ORTHOMCL4854	ORTHOMCL7169	ORTHOMCL5640	ORTHOMCL8518	ORTHOMCL7169
ORTHOMCL9194	ORTHOMCL9406	ORTHOMCL10863	ORTHOMCL5193	ORTHOMCL10870	ORTHOMCL8251	ORTHOMCL10853	ORTHOMCL8069	ORTHOMCL8461	ORTHOMCL8477	ORTHOMCL8069
ORTHOMCL4710	ORTHOMCL10772	ORTHOMCL5718	ORTHOMCL6138	ORTHOMCL10126	ORTHOMCL7848	ORTHOMCL5289	ORTHOMCL4463	ORTHOMCL10863	ORTHOMCL9560	ORTHOMCL4463
ORTHOMCL4463	ORTHOMCL7873	ORTHOMCL10440	ORTHOMCL9249	ORTHOMCL9058	ORTHOMCL4646	ORTHOMCL5640	ORTHOMCL9377	ORTHOMCL5718	ORTHOMCL7278	ORTHOMCL9377
ORTHOMCL6032	ORTHOMCL4884	ORTHOMCL5078	ORTHOMCL10195	ORTHOMCL8315	ORTHOMCL5890	ORTHOMCL8461	ORTHOMCL8821	ORTHOMCL5078	ORTHOMCL7891	ORTHOMCL8821
ORTHOMCL9246	ORTHOMCL8518	ORTHOMCL10870	ORTHOMCL8251	ORTHOMCL4710	ORTHOMCL6462	ORTHOMCL10863	ORTHOMCL7029	ORTHOMCL10870	ORTHOMCL5857	ORTHOMCL7029
ORTHOMCL8821	ORTHOMCL9560	ORTHOMCL5731	ORTHOMCL7848	ORTHOMCL8069	ORTHOMCL7215	ORTHOMCL5718	ORTHOMCL10295	ORTHOMCL10126	ORTHOMCL9546	ORTHOMCL10295
ORTHOMCL7029	ORTHOMCL7278	ORTHOMCL10126	ORTHOMCL4646	ORTHOMCL4463	ORTHOMCL6347	ORTHOMCL5078	ORTHOMCL7916	ORTHOMCL9058	ORTHOMCL5274	ORTHOMCL7916
ORTHOMCL10295	ORTHOMCL6973	ORTHOMCL9058	ORTHOMCL5890	ORTHOMCL10679	ORTHOMCL10327	ORTHOMCL10870	ORTHOMCL7616	ORTHOMCL8315	ORTHOMCL8810	ORTHOMCL7797
ORTHOMCL7409	ORTHOMCL7402	ORTHOMCL8315	ORTHOMCL6289	ORTHOMCL6851	ORTHOMCL5894	ORTHOMCL10776	ORTHOMCL10324	ORTHOMCL7169	ORTHOMCL6093	ORTHOMCL10241
ORTHOMCL6472	ORTHOMCL5864	ORTHOMCL10227	ORTHOMCL6462	ORTHOMCL6066	ORTHOMCL4884	ORTHOMCL10126	ORTHOMCL7797	ORTHOMCL8069	ORTHOMCL4854	ORTHOMCL9516
ORTHOMCL4812	ORTHOMCL5274	ORTHOMCL8069	ORTHOMCL6347	ORTHOMCL9377	ORTHOMCL7390	ORTHOMCL9058	ORTHOMCL10241	ORTHOMCL4463	ORTHOMCL10853	ORTHOMCL9146
ORTHOMCL7916	ORTHOMCL10259	ORTHOMCL4463	ORTHOMCL10327	ORTHOMCL7029	ORTHOMCL8518	ORTHOMCL8315	ORTHOMCL9516	ORTHOMCL9377	ORTHOMCL8206	ORTHOMCL10184
ORTHOMCL10324	ORTHOMCL6093	ORTHOMCL9377	ORTHOMCL5894	ORTHOMCL10295	ORTHOMCL8477	ORTHOMCL10227	ORTHOMCL9146	ORTHOMCL8821	ORTHOMCL5176	ORTHOMCL6389
ORTHOMCL9146	ORTHOMCL5158	ORTHOMCL8821	ORTHOMCL5928	ORTHOMCL4641	ORTHOMCL9560	ORTHOMCL8069	ORTHOMCL10184	ORTHOMCL7029	ORTHOMCL5289	ORTHOMCL9217
ORTHOMCL10184	ORTHOMCL6707	ORTHOMCL7029	ORTHOMCL4884	ORTHOMCL5959	ORTHOMCL7278	ORTHOMCL4463	ORTHOMCL6389	ORTHOMCL10295	ORTHOMCL5640	ORTHOMCL7693
ORTHOMCL6389	ORTHOMCL8803	ORTHOMCL10295	ORTHOMCL7390	ORTHOMCL7616	ORTHOMCL6973	ORTHOMCL9377	ORTHOMCL9866	ORTHOMCL7916	ORTHOMCL8461	ORTHOMCL6826
ORTHOMCL9217	ORTHOMCL5718	ORTHOMCL4641	ORTHOMCL8518	ORTHOMCL8703	ORTHOMCL5214	ORTHOMCL8821	ORTHOMCL9217	ORTHOMCL7616	ORTHOMCL10863	ORTHOMCL6104
ORTHOMCL6346	ORTHOMCL10440	ORTHOMCL10241	ORTHOMCL8477	ORTHOMCL10241	ORTHOMCL7891	ORTHOMCL7029	ORTHOMCL6346	ORTHOMCL10241	ORTHOMCL5718	ORTHOMCL5087
ORTHOMCL7693	ORTHOMCL9049	ORTHOMCL10184	ORTHOMCL9560	ORTHOMCL6389	ORTHOMCL5857	ORTHOMCL10295	ORTHOMCL7693	ORTHOMCL9516	ORTHOMCL5078	ORTHOMCL6937
ORTHOMCL6826	ORTHOMCL5731	ORTHOMCL6389	ORTHOMCL7278	ORTHOMCL9217	ORTHOMCL9546	ORTHOMCL7916	ORTHOMCL6826	ORTHOMCL9146	ORTHOMCL10870	ORTHOMCL10053
ORTHOMCL5087	ORTHOMCL10776	ORTHOMCL9866	ORTHOMCL6973	ORTHOMCL6346	ORTHOMCL5274	ORTHOMCL7616	ORTHOMCL7613	ORTHOMCL10184	ORTHOMCL10776	ORTHOMCL5075
ORTHOMCL6937	ORTHOMCL9058	ORTHOMCL7693	ORTHOMCL5857	ORTHOMCL6826	ORTHOMCL8810	ORTHOMCL10324	ORTHOMCL6104	ORTHOMCL6389	ORTHOMCL10126	ORTHOMCL4536
ORTHOMCL10907	ORTHOMCL8315	ORTHOMCL6826	ORTHOMCL5274	ORTHOMCL7613	ORTHOMCL6093	ORTHOMCL10241	ORTHOMCL6937	ORTHOMCL9217	ORTHOMCL9058	ORTHOMCL9193
ORTHOMCL9462	ORTHOMCL10227	ORTHOMCL6104	ORTHOMCL8810	ORTHOMCL6104	ORTHOMCL10338	ORTHOMCL9146	ORTHOMCL9904	ORTHOMCL7693	ORTHOMCL8315	ORTHOMCL6779
ORTHOMCL8596	ORTHOMCL7169	ORTHOMCL6937	ORTHOMCL7177	ORTHOMCL5087	ORTHOMCL4854	ORTHOMCL10184	ORTHOMCL5075	ORTHOMCL6826	ORTHOMCL10227	ORTHOMCL9599
ORTHOMCL4536	ORTHOMCL8171	ORTHOMCL9904	ORTHOMCL6093	ORTHOMCL6937	ORTHOMCL10853	ORTHOMCL6389	ORTHOMCL8596	ORTHOMCL7613	ORTHOMCL7169	ORTHOMCL7324
ORTHOMCL8196	ORTHOMCL8069	ORTHOMCL8077	ORTHOMCL10338	ORTHOMCL9904	ORTHOMCL8206	ORTHOMCL9217	ORTHOMCL4536	ORTHOMCL6104	ORTHOMCL8069	ORTHOMCL9836
ORTHOMCL9836	ORTHOMCL4463	ORTHOMCL5075	ORTHOMCL4854	ORTHOMCL7831	ORTHOMCL5640	ORTHOMCL7693	ORTHOMCL6779	ORTHOMCL6937	ORTHOMCL4463	ORTHOMCL9229
ORTHOMCL7358	ORTHOMCL10843	ORTHOMCL8596	ORTHOMCL10853	ORTHOMCL5075	ORTHOMCL8461	ORTHOMCL6826	ORTHOMCL7533	ORTHOMCL9904	ORTHOMCL9377	ORTHOMCL7553
ORTHOMCL7553	ORTHOMCL9377	ORTHOMCL4536	ORTHOMCL5289	ORTHOMCL8596	ORTHOMCL10863	ORTHOMCL7613	ORTHOMCL8196	ORTHOMCL8077	ORTHOMCL8821	ORTHOMCL7579
ORTHOMCL10743	ORTHOMCL8821	ORTHOMCL9193	ORTHOMCL5640	ORTHOMCL4536	ORTHOMCL7498	ORTHOMCL6104	ORTHOMCL9599	ORTHOMCL5075	ORTHOMCL10295	ORTHOMCL9966
ORTHOMCL9209	ORTHOMCL10295	ORTHOMCL6779	ORTHOMCL8461	ORTHOMCL6779	ORTHOMCL5718	ORTHOMCL5087	ORTHOMCL7324	ORTHOMCL4536	ORTHOMCL7916	ORTHOMCL9708
ORTHOMCL10113	ORTHOMCL10324	ORTHOMCL8196	ORTHOMCL10863	ORTHOMCL8119	ORTHOMCL5078	ORTHOMCL6937	ORTHOMCL9836	ORTHOMCL6779	ORTHOMCL7616	ORTHOMCL6348
ORTHOMCL4540	ORTHOMCL10241	ORTHOMCL7324	ORTHOMCL5718	ORTHOMCL7324	ORTHOMCL10870	ORTHOMCL9904	ORTHOMCL9229	ORTHOMCL8196	ORTHOMCL8703	ORTHOMCL4540
ORTHOMCL4773	ORTHOMCL9146	ORTHOMCL9836	ORTHOMCL10440	ORTHOMCL9836	ORTHOMCL10126	ORTHOMCL5075	ORTHOMCL7358	ORTHOMCL7324	ORTHOMCL7797	ORTHOMCL8983
ORTHOMCL6333	ORTHOMCL10184	ORTHOMCL9229	ORTHOMCL5078	ORTHOMCL9229	ORTHOMCL9058	ORTHOMCL8596	ORTHOMCL7553	ORTHOMCL9836	ORTHOMCL9516	ORTHOMCL4450
ORTHOMCL4900	ORTHOMCL6389	ORTHOMCL7358	ORTHOMCL10870	ORTHOMCL7358	ORTHOMCL8315	ORTHOMCL4536	ORTHOMCL7579	ORTHOMCL9229	ORTHOMCL9146	ORTHOMCL10658
ORTHOMCL5382	ORTHOMCL6346	ORTHOMCL7553	ORTHOMCL5731	ORTHOMCL7553	ORTHOMCL10227	ORTHOMCL6779	ORTHOMCL9966	ORTHOMCL7358	ORTHOMCL10184	ORTHOMCL6333
ORTHOMCL5564	ORTHOMCL5280	ORTHOMCL10443	ORTHOMCL10126	ORTHOMCL10443	ORTHOMCL8069	ORTHOMCL8196	ORTHOMCL9708	ORTHOMCL7553	ORTHOMCL6389	ORTHOMCL8527
ORTHOMCL4407	ORTHOMCL6104	ORTHOMCL7579	ORTHOMCL9058	ORTHOMCL7937	ORTHOMCL4463	ORTHOMCL9599	ORTHOMCL6348	ORTHOMCL10443	ORTHOMCL9866	ORTHOMCL5382
ORTHOMCL5283	ORTHOMCL5087	ORTHOMCL9209	ORTHOMCL8315	ORTHOMCL7579	ORTHOMCL6851	ORTHOMCL7324	ORTHOMCL4540	ORTHOMCL7579	ORTHOMCL9217	ORTHOMCL7590
ORTHOMCL10542	ORTHOMCL6937	ORTHOMCL9708	ORTHOMCL10227	ORTHOMCL9209	ORTHOMCL9377	ORTHOMCL9836	ORTHOMCL8983	ORTHOMCL9966	ORTHOMCL7693	ORTHOMCL4407
ORTHOMCL5522	ORTHOMCL10538	ORTHOMCL4540	ORTHOMCL8069	ORTHOMCL9708	ORTHOMCL8821	ORTHOMCL7358	ORTHOMCL4450	ORTHOMCL9708	ORTHOMCL6826	ORTHOMCL8074
ORTHOMCL5219	ORTHOMCL10907	ORTHOMCL8983	ORTHOMCL4463	ORTHOMCL4540	ORTHOMCL7029	ORTHOMCL7553	ORTHOMCL10658	ORTHOMCL4540	ORTHOMCL7613	ORTHOMCL5283
ORTHOMCL6898	ORTHOMCL9904	ORTHOMCL4450	ORTHOMCL9377	ORTHOMCL8983	ORTHOMCL10295	ORTHOMCL10443	ORTHOMCL6333	ORTHOMCL8983	ORTHOMCL5087	ORTHOMCL6934
ORTHOMCL9677	ORTHOMCL10547	ORTHOMCL10658	ORTHOMCL8821	ORTHOMCL4450	ORTHOMCL4641	ORTHOMCL7937	ORTHOMCL8527	ORTHOMCL4450	ORTHOMCL6937	ORTHOMCL10842
ORTHOMCL4659	ORTHOMCL7831	ORTHOMCL6333	ORTHOMCL7029	ORTHOMCL10658	ORTHOMCL7916	ORTHOMCL7579	ORTHOMCL8133	ORTHOMCL10658	ORTHOMCL9904	ORTHOMCL9662
ORTHOMCL7621	ORTHOMCL5075	ORTHOMCL8527	ORTHOMCL10295	ORTHOMCL6333	ORTHOMCL7616	ORTHOMCL9966	ORTHOMCL5382	ORTHOMCL6333	ORTHOMCL8077	ORTHOMCL6669
ORTHOMCL4677	ORTHOMCL8808	ORTHOMCL8133	ORTHOMCL7916	ORTHOMCL5382	ORTHOMCL10241	ORTHOMCL9708	ORTHOMCL4831	ORTHOMCL8527	ORTHOMCL10053	ORTHOMCL8658
ORTHOMCL5544	ORTHOMCL4536	ORTHOMCL5382	ORTHOMCL7616	ORTHOMCL7590	ORTHOMCL9146	ORTHOMCL6348	ORTHOMCL7590	ORTHOMCL8133	ORTHOMCL5075	ORTHOMCL6898
ORTHOMCL4913	ORTHOMCL6779	ORTHOMCL4407	ORTHOMCL10241	ORTHOMCL4407	ORTHOMCL10184	ORTHOMCL4540	ORTHOMCL4407	ORTHOMCL5382	ORTHOMCL8596	ORTHOMCL9317
ORTHOMCL6765	ORTHOMCL7533	ORTHOMCL10855	ORTHOMCL9146	ORTHOMCL10855	ORTHOMCL6389	ORTHOMCL8983	ORTHOMCL8074	ORTHOMCL7590	ORTHOMCL4536	ORTHOMCL10984
ORTHOMCL7810	ORTHOMCL8196	ORTHOMCL8074	ORTHOMCL10184	ORTHOMCL8787	ORTHOMCL9866	ORTHOMCL4450	ORTHOMCL10842	ORTHOMCL4407	ORTHOMCL6779	ORTHOMCL6132
ORTHOMCL8849	ORTHOMCL8356	ORTHOMCL4941	ORTHOMCL6389	ORTHOMCL6406	ORTHOMCL9217	ORTHOMCL10658	ORTHOMCL9662	ORTHOMCL8074	ORTHOMCL8119	ORTHOMCL7621
ORTHOMCL10025	ORTHOMCL9836	ORTHOMCL9328	ORTHOMCL9217	ORTHOMCL9662	ORTHOMCL7693	ORTHOMCL6333	ORTHOMCL6669	ORTHOMCL5283	ORTHOMCL8317	ORTHOMCL10918
ORTHOMCL4438	ORTHOMCL7358	ORTHOMCL10842	ORTHOMCL7693	ORTHOMCL6898	ORTHOMCL6826	ORTHOMCL8527	ORTHOMCL8658	ORTHOMCL9328	ORTHOMCL9599	ORTHOMCL5544
ORTHOMCL8483	ORTHOMCL7553	ORTHOMCL7575	ORTHOMCL6826	ORTHOMCL9317	ORTHOMCL7613	ORTHOMCL8133	ORTHOMCL9317	ORTHOMCL6934	ORTHOMCL9836	ORTHOMCL5749
ORTHOMCL6956	ORTHOMCL7579	ORTHOMCL9662	ORTHOMCL5087	ORTHOMCL7621	ORTHOMCL6104	ORTHOMCL5382	ORTHOMCL6132	ORTHOMCL9662	ORTHOMCL9229	ORTHOMCL6535
ORTHOMCL4742	ORTHOMCL4540	ORTHOMCL6669	ORTHOMCL6937	ORTHOMCL8531	ORTHOMCL5087	ORTHOMCL4407	ORTHOMCL7621	ORTHOMCL6669	ORTHOMCL7553	ORTHOMCL8849
ORTHOMCL4752	ORTHOMCL4773	ORTHOMCL6898	ORTHOMCL9904	ORTHOMCL6535	ORTHOMCL6937	ORTHOMCL10855	ORTHOMCL10918	ORTHOMCL5597	ORTHOMCL10443	ORTHOMCL4737
ORTHOMCL5275	ORTHOMCL10658	ORTHOMCL9317	ORTHOMCL10053	ORTHOMCL6765	ORTHOMCL9904	ORTHOMCL8074	ORTHOMCL4677	ORTHOMCL9317	ORTHOMCL7937	ORTHOMCL10025
ORTHOMCL4474	ORTHOMCL6333	ORTHOMCL6132	ORTHOMCL5075	ORTHOMCL7291	ORTHOMCL8077	ORTHOMCL4941	ORTHOMCL4913	ORTHOMCL6132	ORTHOMCL7579	ORTHOMCL4438
ORTHOMCL7819	ORTHOMCL4900	ORTHOMCL7621	ORTHOMCL8596	ORTHOMCL9043	ORTHOMCL5075	ORTHOMCL7575	ORTHOMCL5749	ORTHOMCL7621	ORTHOMCL9966	ORTHOMCL8483
ORTHOMCL8716	ORTHOMCL8527	ORTHOMCL10918	ORTHOMCL4536	ORTHOMCL4737	ORTHOMCL8596	ORTHOMCL9662	ORTHOMCL6535	ORTHOMCL10918	ORTHOMCL9708	ORTHOMCL6956
ORTHOMCL5515	ORTHOMCL5564	ORTHOMCL4677	ORTHOMCL6779	ORTHOMCL10025	ORTHOMCL4536	ORTHOMCL10116	ORTHOMCL6765	ORTHOMCL4677	ORTHOMCL4540	ORTHOMCL5275
ORTHOMCL5490	ORTHOMCL4407	ORTHOMCL4913	ORTHOMCL8196	ORTHOMCL4438	ORTHOMCL9193	ORTHOMCL6669	ORTHOMCL9346	ORTHOMCL5544	ORTHOMCL8983	ORTHOMCL10570
ORTHOMCL6411	ORTHOMCL5670	ORTHOMCL5749	ORTHOMCL8317	ORTHOMCL6956	ORTHOMCL6779	ORTHOMCL9317	ORTHOMCL4737	ORTHOMCL5749	ORTHOMCL4450	ORTHOMCL7819
ORTHOMCL10909	ORTHOMCL6934	ORTHOMCL6535	ORTHOMCL9836	ORTHOMCL5589	ORTHOMCL8196	ORTHOMCL6132	ORTHOMCL10025	ORTHOMCL6535	ORTHOMCL10658	ORTHOMCL5515
ORTHOMCL6020	ORTHOMCL10542	ORTHOMCL9043	ORTHOMCL9229	ORTHOMCL10520	ORTHOMCL7324	ORTHOMCL7621	ORTHOMCL4438	ORTHOMCL8849	ORTHOMCL6333	ORTHOMCL4762
ORTHOMCL10346	ORTHOMCL9662	ORTHOMCL4737	ORTHOMCL7358	ORTHOMCL4742	ORTHOMCL9836	ORTHOMCL9831	ORTHOMCL8483	ORTHOMCL9043	ORTHOMCL8133	ORTHOMCL5490
ORTHOMCL10756	ORTHOMCL10116	ORTHOMCL10025	ORTHOMCL7553	ORTHOMCL4752	ORTHOMCL9229	ORTHOMCL5544	ORTHOMCL6956	ORTHOMCL10025	ORTHOMCL5382	ORTHOMCL4560
ORTHOMCL4924	ORTHOMCL5805	ORTHOMCL4438	ORTHOMCL7937	ORTHOMCL5275	ORTHOMCL7358	ORTHOMCL5749	ORTHOMCL5275	ORTHOMCL4438	ORTHOMCL7590	ORTHOMCL6511
ORTHOMCL5634	ORTHOMCL6898	ORTHOMCL6956	ORTHOMCL7579	ORTHOMCL4474	ORTHOMCL7553	ORTHOMCL6535	ORTHOMCL4474	ORTHOMCL8483	ORTHOMCL4407	ORTHOMCL7787
ORTHOMCL9640	ORTHOMCL9317	ORTHOMCL4742	ORTHOMCL9966	ORTHOMCL10570	ORTHOMCL10443	ORTHOMCL9043	ORTHOMCL10570	ORTHOMCL6956	ORTHOMCL4941	ORTHOMCL9950
ORTHOMCL7896	ORTHOMCL4659	ORTHOMCL5275	ORTHOMCL9708	ORTHOMCL7819	ORTHOMCL7579	ORTHOMCL4737	ORTHOMCL7819	ORTHOMCL10520	ORTHOMCL8787	ORTHOMCL7240
ORTHOMCL9310	ORTHOMCL6132	ORTHOMCL4474	ORTHOMCL6348	ORTHOMCL5229	ORTHOMCL9966	ORTHOMCL10025	ORTHOMCL5229	ORTHOMCL5275	ORTHOMCL9328	ORTHOMCL10346
ORTHOMCL5460	ORTHOMCL7621	ORTHOMCL10570	ORTHOMCL4540	ORTHOMCL8716	ORTHOMCL9708	ORTHOMCL4438	ORTHOMCL4762	ORTHOMCL4474	ORTHOMCL6934	ORTHOMCL7740
ORTHOMCL7699	ORTHOMCL4677	ORTHOMCL5515	ORTHOMCL8983	ORTHOMCL4762	ORTHOMCL6348	ORTHOMCL6956	ORTHOMCL5490	ORTHOMCL10570	ORTHOMCL7575	ORTHOMCL5634
ORTHOMCL4499	ORTHOMCL4913	ORTHOMCL4762	ORTHOMCL4450	ORTHOMCL6511	ORTHOMCL4540	ORTHOMCL4742	ORTHOMCL4560	ORTHOMCL7819	ORTHOMCL9662	ORTHOMCL9310
ORTHOMCL4893	ORTHOMCL6535	ORTHOMCL8869	ORTHOMCL10658	ORTHOMCL10705	ORTHOMCL8983	ORTHOMCL5275	ORTHOMCL7787	ORTHOMCL5490	ORTHOMCL6669	ORTHOMCL7161
ORTHOMCL5337	ORTHOMCL6765	ORTHOMCL5490	ORTHOMCL6333	ORTHOMCL9950	ORTHOMCL4450	ORTHOMCL4474	ORTHOMCL9950	ORTHOMCL10740	ORTHOMCL8658	ORTHOMCL4499
ORTHOMCL10163	ORTHOMCL9346	ORTHOMCL7787	ORTHOMCL8527	ORTHOMCL7240	ORTHOMCL10658	ORTHOMCL10570	ORTHOMCL7240	ORTHOMCL4560	ORTHOMCL9317	ORTHOMCL9792
ORTHOMCL7921	ORTHOMCL8849	ORTHOMCL7240	ORTHOMCL8133	ORTHOMCL10346	ORTHOMCL6333	ORTHOMCL5515	ORTHOMCL10346	ORTHOMCL9950	ORTHOMCL7621	ORTHOMCL4907
ORTHOMCL4709	ORTHOMCL10025	ORTHOMCL10346	ORTHOMCL5382	ORTHOMCL4924	ORTHOMCL8527	ORTHOMCL4762	ORTHOMCL7740	ORTHOMCL7240	ORTHOMCL7363	ORTHOMCL5783
ORTHOMCL8571	ORTHOMCL8483	ORTHOMCL4924	ORTHOMCL4407	ORTHOMCL9994	ORTHOMCL8133	ORTHOMCL5490	ORTHOMCL4924	ORTHOMCL10346	ORTHOMCL10918	ORTHOMCL7921
ORTHOMCL8720	ORTHOMCL6956	ORTHOMCL5634	ORTHOMCL10855	ORTHOMCL4756	ORTHOMCL5382	ORTHOMCL4560	ORTHOMCL5634	ORTHOMCL7740	ORTHOMCL4677	ORTHOMCL8720
ORTHOMCL10645	ORTHOMCL10520	ORTHOMCL5203	ORTHOMCL8074	ORTHOMCL5203	ORTHOMCL4407	ORTHOMCL7240	ORTHOMCL9994	ORTHOMCL4924	ORTHOMCL5544	ORTHOMCL10645
ORTHOMCL6407	ORTHOMCL8204	ORTHOMCL9310	ORTHOMCL10842	ORTHOMCL8403	ORTHOMCL10855	ORTHOMCL10346	ORTHOMCL5203	ORTHOMCL5634	ORTHOMCL5749	ORTHOMCL9355
ORTHOMCL6366	ORTHOMCL4742	ORTHOMCL7161	ORTHOMCL10542	ORTHOMCL7161	ORTHOMCL8074	ORTHOMCL7740	ORTHOMCL8403	ORTHOMCL5203	ORTHOMCL6535	ORTHOMCL10792
ORTHOMCL8123	ORTHOMCL4752	ORTHOMCL5460	ORTHOMCL7575	ORTHOMCL7699	ORTHOMCL4941	ORTHOMCL4924	ORTHOMCL9310	ORTHOMCL8403	ORTHOMCL6765	ORTHOMCL6366
ORTHOMCL5082	ORTHOMCL5275	ORTHOMCL7699	ORTHOMCL9662	ORTHOMCL4499	ORTHOMCL9328	ORTHOMCL5634	ORTHOMCL7161	ORTHOMCL7161	ORTHOMCL4737	ORTHOMCL8123
ORTHOMCL4806	ORTHOMCL7819	ORTHOMCL4499	ORTHOMCL5597	ORTHOMCL9002	ORTHOMCL7575	ORTHOMCL8347	ORTHOMCL4499	ORTHOMCL5460	ORTHOMCL10025	ORTHOMCL8373
ORTHOMCL5962	ORTHOMCL8716	ORTHOMCL9792	ORTHOMCL6898	ORTHOMCL9792	ORTHOMCL10116	ORTHOMCL5203	ORTHOMCL9792	ORTHOMCL4499	ORTHOMCL6956	ORTHOMCL4806
ORTHOMCL4964	ORTHOMCL4762	ORTHOMCL5783	ORTHOMCL9317	ORTHOMCL10163	ORTHOMCL6669	ORTHOMCL4504	ORTHOMCL7921	ORTHOMCL9792	ORTHOMCL10520	ORTHOMCL5962
ORTHOMCL7799	ORTHOMCL5490	ORTHOMCL7921	ORTHOMCL5003	ORTHOMCL8898	ORTHOMCL5597	ORTHOMCL7161	ORTHOMCL8720	ORTHOMCL8898	ORTHOMCL4752	ORTHOMCL9736
ORTHOMCL9736	ORTHOMCL4560	ORTHOMCL4709	ORTHOMCL6132	ORTHOMCL9784	ORTHOMCL6898	ORTHOMCL7699	ORTHOMCL10792	ORTHOMCL7921	ORTHOMCL5275	ORTHOMCL5057
ORTHOMCL5057	ORTHOMCL6511	ORTHOMCL8720	ORTHOMCL7621	ORTHOMCL7921	ORTHOMCL9317	ORTHOMCL4499	ORTHOMCL6366	ORTHOMCL4709	ORTHOMCL4474	ORTHOMCL6280
ORTHOMCL6135	ORTHOMCL10909	ORTHOMCL10645	ORTHOMCL4677	ORTHOMCL4709	ORTHOMCL7621	ORTHOMCL9792	ORTHOMCL4676	ORTHOMCL8720	ORTHOMCL10570	ORTHOMCL7823
ORTHOMCL6280	ORTHOMCL7641	ORTHOMCL9355	ORTHOMCL4913	ORTHOMCL10645	ORTHOMCL4677	ORTHOMCL4907	ORTHOMCL8373	ORTHOMCL10645	ORTHOMCL5002	ORTHOMCL8308
ORTHOMCL6828	ORTHOMCL6288	ORTHOMCL10792	ORTHOMCL5749	ORTHOMCL10792	ORTHOMCL5544	ORTHOMCL9784	ORTHOMCL4806	ORTHOMCL10792	ORTHOMCL5490	ORTHOMCL8274
ORTHOMCL7823	ORTHOMCL10346	ORTHOMCL6366	ORTHOMCL6535	ORTHOMCL6366	ORTHOMCL4913	ORTHOMCL7921	ORTHOMCL5962	ORTHOMCL6366	ORTHOMCL4560	ORTHOMCL4436
ORTHOMCL8274	ORTHOMCL8445	ORTHOMCL4676	ORTHOMCL6765	ORTHOMCL8123	ORTHOMCL5749	ORTHOMCL8720	ORTHOMCL5108	ORTHOMCL8373	ORTHOMCL6511	ORTHOMCL8676
ORTHOMCL9473	ORTHOMCL5634	ORTHOMCL4806	ORTHOMCL8849	ORTHOMCL4676	ORTHOMCL6765	ORTHOMCL10645	ORTHOMCL9736	ORTHOMCL4806	ORTHOMCL9950	ORTHOMCL4746
ORTHOMCL8697	ORTHOMCL4504	ORTHOMCL5962	ORTHOMCL9043	ORTHOMCL8373	ORTHOMCL8849	ORTHOMCL10792	ORTHOMCL5057	ORTHOMCL5962	ORTHOMCL10909	ORTHOMCL7325
ORTHOMCL8676	ORTHOMCL9310	ORTHOMCL5168	ORTHOMCL4737	ORTHOMCL5962	ORTHOMCL9043	ORTHOMCL6366	ORTHOMCL6135	ORTHOMCL5849	ORTHOMCL7240	ORTHOMCL7422
ORTHOMCL4746	ORTHOMCL5460	ORTHOMCL9736	ORTHOMCL10025	ORTHOMCL5057	ORTHOMCL4737	ORTHOMCL8123	ORTHOMCL6280	ORTHOMCL5108	ORTHOMCL6288	ORTHOMCL9511
ORTHOMCL7325	ORTHOMCL7699	ORTHOMCL5057	ORTHOMCL4438	ORTHOMCL6135	ORTHOMCL10025	ORTHOMCL4676	ORTHOMCL7019	ORTHOMCL9736	ORTHOMCL10346	ORTHOMCL10601
ORTHOMCL8994	ORTHOMCL9002	ORTHOMCL6135	ORTHOMCL6956	ORTHOMCL6280	ORTHOMCL4438	ORTHOMCL8373	ORTHOMCL7823	ORTHOMCL5057	ORTHOMCL7740	ORTHOMCL10148
ORTHOMCL5271	ORTHOMCL4907	ORTHOMCL6280	ORTHOMCL4742	ORTHOMCL6828	ORTHOMCL6956	ORTHOMCL4806	ORTHOMCL8308	ORTHOMCL6135	ORTHOMCL4924	ORTHOMCL8208
ORTHOMCL10148	ORTHOMCL4403	ORTHOMCL7823	ORTHOMCL5275	ORTHOMCL7823	ORTHOMCL4742	ORTHOMCL5962	ORTHOMCL8676	ORTHOMCL6280	ORTHOMCL5634	ORTHOMCL5806
ORTHOMCL6935	ORTHOMCL6908	ORTHOMCL8308	ORTHOMCL4474	ORTHOMCL8308	ORTHOMCL5275	ORTHOMCL5168	ORTHOMCL4746	ORTHOMCL7823	ORTHOMCL5203	ORTHOMCL6489
ORTHOMCL7730	ORTHOMCL9784	ORTHOMCL8274	ORTHOMCL10570	ORTHOMCL8274	ORTHOMCL4474	ORTHOMCL5108	ORTHOMCL7325	ORTHOMCL8308	ORTHOMCL8403	ORTHOMCL9782
ORTHOMCL4817	ORTHOMCL7921	ORTHOMCL8676	ORTHOMCL4762	ORTHOMCL4578	ORTHOMCL10570	ORTHOMCL9736	ORTHOMCL7422	ORTHOMCL8274	ORTHOMCL7161	ORTHOMCL9122
ORTHOMCL5043	ORTHOMCL8720	ORTHOMCL4746	ORTHOMCL5490	ORTHOMCL4746	ORTHOMCL5229	ORTHOMCL5057	ORTHOMCL9511	ORTHOMCL8676	ORTHOMCL5460	ORTHOMCL4701
ORTHOMCL5333	ORTHOMCL10645	ORTHOMCL7325	ORTHOMCL4560	ORTHOMCL7325	ORTHOMCL5490	ORTHOMCL6135	ORTHOMCL10148	ORTHOMCL4746	ORTHOMCL4499	ORTHOMCL7203
ORTHOMCL4701	ORTHOMCL6317	ORTHOMCL5271	ORTHOMCL7787	ORTHOMCL7422	ORTHOMCL7787	ORTHOMCL6280	ORTHOMCL8216	ORTHOMCL7325	ORTHOMCL9002	ORTHOMCL8386
ORTHOMCL10738	ORTHOMCL10032	ORTHOMCL7422	ORTHOMCL9950	ORTHOMCL9511	ORTHOMCL7240	ORTHOMCL7823	ORTHOMCL9782	ORTHOMCL5271	ORTHOMCL9792	ORTHOMCL7530
ORTHOMCL9978	ORTHOMCL9355	ORTHOMCL9511	ORTHOMCL7240	ORTHOMCL10601	ORTHOMCL6288	ORTHOMCL8308	ORTHOMCL5333	ORTHOMCL9511	ORTHOMCL5337	ORTHOMCL9615
ORTHOMCL4593	ORTHOMCL5147	ORTHOMCL10601	ORTHOMCL6020	ORTHOMCL8208	ORTHOMCL10346	ORTHOMCL8274	ORTHOMCL9122	ORTHOMCL10601	ORTHOMCL8898	ORTHOMCL4593
ORTHOMCL9135	ORTHOMCL4806	ORTHOMCL10148	ORTHOMCL10346	ORTHOMCL6489	ORTHOMCL7740	ORTHOMCL8676	ORTHOMCL4701	ORTHOMCL10148	ORTHOMCL7921	ORTHOMCL9135
ORTHOMCL6256	ORTHOMCL8010	ORTHOMCL8208	ORTHOMCL10775	ORTHOMCL7062	ORTHOMCL4924	ORTHOMCL4746	ORTHOMCL7518	ORTHOMCL8208	ORTHOMCL10955	ORTHOMCL6914
ORTHOMCL10969	ORTHOMCL7799	ORTHOMCL6489	ORTHOMCL7740	ORTHOMCL9782	ORTHOMCL5634	ORTHOMCL9883	ORTHOMCL4511	ORTHOMCL5806	ORTHOMCL8720	ORTHOMCL8313
ORTHOMCL7813	ORTHOMCL9736	ORTHOMCL4873	ORTHOMCL4924	ORTHOMCL10102	ORTHOMCL8347	ORTHOMCL7325	ORTHOMCL9615	ORTHOMCL7062	ORTHOMCL10645	ORTHOMCL10969
ORTHOMCL6948	ORTHOMCL5057	ORTHOMCL9782	ORTHOMCL5634	ORTHOMCL5333	ORTHOMCL5203	ORTHOMCL9511	ORTHOMCL4593	ORTHOMCL9782	ORTHOMCL6366	ORTHOMCL7813
ORTHOMCL7629	ORTHOMCL6135	ORTHOMCL10102	ORTHOMCL7161	ORTHOMCL9122	ORTHOMCL7161	ORTHOMCL10601	ORTHOMCL4827	ORTHOMCL10102	ORTHOMCL4676	ORTHOMCL9987
ORTHOMCL4798	ORTHOMCL6280	ORTHOMCL9122	ORTHOMCL7699	ORTHOMCL9978	ORTHOMCL5460	ORTHOMCL10148	ORTHOMCL10697	ORTHOMCL5333	ORTHOMCL8373	ORTHOMCL8199
ORTHOMCL9062	ORTHOMCL7019	ORTHOMCL4701	ORTHOMCL9792	ORTHOMCL4511	ORTHOMCL7699	ORTHOMCL5806	ORTHOMCL6914	ORTHOMCL9122	ORTHOMCL4806	ORTHOMCL6948
ORTHOMCL4753	ORTHOMCL7823	ORTHOMCL7084	ORTHOMCL4907	ORTHOMCL4524	ORTHOMCL4499	ORTHOMCL6489	ORTHOMCL8313	ORTHOMCL7203	ORTHOMCL5108	ORTHOMCL8291
ORTHOMCL8769	ORTHOMCL8308	ORTHOMCL4593	ORTHOMCL7921	ORTHOMCL4593	ORTHOMCL9792	ORTHOMCL7062	ORTHOMCL10969	ORTHOMCL8386	ORTHOMCL5057	ORTHOMCL7629
ORTHOMCL10353	ORTHOMCL4436	ORTHOMCL10697	ORTHOMCL9815	ORTHOMCL10697	ORTHOMCL5783	ORTHOMCL9782	ORTHOMCL5323	ORTHOMCL7530	ORTHOMCL6135	ORTHOMCL4798
ORTHOMCL9447	ORTHOMCL8676	ORTHOMCL6914	ORTHOMCL4709	ORTHOMCL6914	ORTHOMCL7921	ORTHOMCL9122	ORTHOMCL7813	ORTHOMCL9615	ORTHOMCL6280	ORTHOMCL10458
ORTHOMCL4885	ORTHOMCL4746	ORTHOMCL8313	ORTHOMCL8720	ORTHOMCL8313	ORTHOMCL4709	ORTHOMCL4701	ORTHOMCL8199	ORTHOMCL4593	ORTHOMCL6828	ORTHOMCL9062
ORTHOMCL6330	ORTHOMCL7422	ORTHOMCL10969	ORTHOMCL10645	ORTHOMCL10969	ORTHOMCL8720	ORTHOMCL10738	ORTHOMCL6948	ORTHOMCL9135	ORTHOMCL7823	ORTHOMCL8769
ORTHOMCL8907	ORTHOMCL9511	ORTHOMCL7813	ORTHOMCL10792	ORTHOMCL7813	ORTHOMCL10645	ORTHOMCL10920	ORTHOMCL7629	ORTHOMCL6256	ORTHOMCL8308	ORTHOMCL4885
ORTHOMCL8079	ORTHOMCL6695	ORTHOMCL9987	ORTHOMCL6366	ORTHOMCL9987	ORTHOMCL6366	ORTHOMCL7530	ORTHOMCL4798	ORTHOMCL4827	ORTHOMCL8676	ORTHOMCL10688
ORTHOMCL5248	ORTHOMCL10148	ORTHOMCL8199	ORTHOMCL8123	ORTHOMCL8291	ORTHOMCL8123	ORTHOMCL4593	ORTHOMCL10458	ORTHOMCL6914	ORTHOMCL4746	ORTHOMCL8907
ORTHOMCL5566	ORTHOMCL5356	ORTHOMCL6948	ORTHOMCL5147	ORTHOMCL7629	ORTHOMCL4676	ORTHOMCL6256	ORTHOMCL10202	ORTHOMCL8313	ORTHOMCL7325	ORTHOMCL8079
ORTHOMCL6246	ORTHOMCL8208	ORTHOMCL4798	ORTHOMCL8373	ORTHOMCL4798	ORTHOMCL8373	ORTHOMCL4827	ORTHOMCL9062	ORTHOMCL10969	ORTHOMCL5271	ORTHOMCL5248
ORTHOMCL10642	ORTHOMCL6935	ORTHOMCL10458	ORTHOMCL4806	ORTHOMCL10458	ORTHOMCL4806	ORTHOMCL10697	ORTHOMCL4753	ORTHOMCL7813	ORTHOMCL9511	ORTHOMCL10663
ORTHOMCL5769	ORTHOMCL9940	ORTHOMCL9062	ORTHOMCL5962	ORTHOMCL9062	ORTHOMCL5849	ORTHOMCL6914	ORTHOMCL8769	ORTHOMCL9987	ORTHOMCL10148	ORTHOMCL6246
ORTHOMCL7380	ORTHOMCL6489	ORTHOMCL4753	ORTHOMCL5168	ORTHOMCL4753	ORTHOMCL5108	ORTHOMCL8313	ORTHOMCL4885	ORTHOMCL8199	ORTHOMCL6489	ORTHOMCL5630
ORTHOMCL10802	ORTHOMCL5118	ORTHOMCL8769	ORTHOMCL5849	ORTHOMCL4969	ORTHOMCL9736	ORTHOMCL10969	ORTHOMCL10688	ORTHOMCL6948	ORTHOMCL9782	ORTHOMCL10642
ORTHOMCL10333	ORTHOMCL4817	ORTHOMCL4885	ORTHOMCL5108	ORTHOMCL5514	ORTHOMCL5057	ORTHOMCL7813	ORTHOMCL8907	ORTHOMCL7629	ORTHOMCL10102	ORTHOMCL10802
ORTHOMCL5040	ORTHOMCL9063	ORTHOMCL7171	ORTHOMCL9736	ORTHOMCL9447	ORTHOMCL6135	ORTHOMCL9987	ORTHOMCL5294	ORTHOMCL4798	ORTHOMCL5333	ORTHOMCL10333
ORTHOMCL7496	ORTHOMCL5043	ORTHOMCL7244	ORTHOMCL5057	ORTHOMCL4885	ORTHOMCL6280	ORTHOMCL8199	ORTHOMCL8079	ORTHOMCL10458	ORTHOMCL9122	ORTHOMCL5040
ORTHOMCL9848	ORTHOMCL5333	ORTHOMCL8907	ORTHOMCL6135	ORTHOMCL6502	ORTHOMCL7823	ORTHOMCL6948	ORTHOMCL5248	ORTHOMCL9062	ORTHOMCL4701	ORTHOMCL4424
ORTHOMCL4424	ORTHOMCL7203	ORTHOMCL8079	ORTHOMCL6280	ORTHOMCL6330	ORTHOMCL8308	ORTHOMCL4798	ORTHOMCL6246	ORTHOMCL4753	ORTHOMCL9978	ORTHOMCL5862
ORTHOMCL10780	ORTHOMCL10738	ORTHOMCL5248	ORTHOMCL7823	ORTHOMCL8907	ORTHOMCL8274	ORTHOMCL10458	ORTHOMCL10642	ORTHOMCL8769	ORTHOMCL8386	ORTHOMCL5845
ORTHOMCL8039	ORTHOMCL7084	ORTHOMCL10663	ORTHOMCL8308	ORTHOMCL8079	ORTHOMCL8676	ORTHOMCL9062	ORTHOMCL10802	ORTHOMCL9293	ORTHOMCL7530	ORTHOMCL5195
ORTHOMCL5195	ORTHOMCL8386	ORTHOMCL6246	ORTHOMCL8274	ORTHOMCL10663	ORTHOMCL4746	ORTHOMCL4753	ORTHOMCL10333	ORTHOMCL9447	ORTHOMCL9135	ORTHOMCL10426
ORTHOMCL9564	ORTHOMCL4511	ORTHOMCL5630	ORTHOMCL8676	ORTHOMCL6246	ORTHOMCL5271	ORTHOMCL5001	ORTHOMCL5040	ORTHOMCL4885	ORTHOMCL10697	ORTHOMCL9944
ORTHOMCL6007	ORTHOMCL4593	ORTHOMCL10642	ORTHOMCL7325	ORTHOMCL10642	ORTHOMCL7422	ORTHOMCL5514	ORTHOMCL4424	ORTHOMCL10688	ORTHOMCL10013	ORTHOMCL6007
ORTHOMCL5551	ORTHOMCL9135	ORTHOMCL10333	ORTHOMCL5271	ORTHOMCL10333	ORTHOMCL9511	ORTHOMCL4885	ORTHOMCL5862	ORTHOMCL8907	ORTHOMCL5895	ORTHOMCL6287
ORTHOMCL6460	ORTHOMCL6256	ORTHOMCL5040	ORTHOMCL9511	ORTHOMCL5040	ORTHOMCL10601	ORTHOMCL7171	ORTHOMCL5845	ORTHOMCL8079	ORTHOMCL6914	ORTHOMCL6460
ORTHOMCL8886	ORTHOMCL10649	ORTHOMCL9848	ORTHOMCL10601	ORTHOMCL4424	ORTHOMCL5806	ORTHOMCL7244	ORTHOMCL5195	ORTHOMCL5248	ORTHOMCL8313	ORTHOMCL6854
ORTHOMCL7850	ORTHOMCL4827	ORTHOMCL4424	ORTHOMCL10148	ORTHOMCL5862	ORTHOMCL6489	ORTHOMCL8079	ORTHOMCL9564	ORTHOMCL10663	ORTHOMCL10969	ORTHOMCL7835
ORTHOMCL7167	ORTHOMCL9928	ORTHOMCL5862	ORTHOMCL5806	ORTHOMCL5195	ORTHOMCL9782	ORTHOMCL5248	ORTHOMCL10462	ORTHOMCL6246	ORTHOMCL9987	ORTHOMCL4399
ORTHOMCL7750	ORTHOMCL10697	ORTHOMCL5845	ORTHOMCL6489	ORTHOMCL9564	ORTHOMCL9122	ORTHOMCL10663	ORTHOMCL10426	ORTHOMCL5630	ORTHOMCL8199	ORTHOMCL7167
ORTHOMCL5291	ORTHOMCL8199	ORTHOMCL8039	ORTHOMCL9782	ORTHOMCL10462	ORTHOMCL4701	ORTHOMCL5630	ORTHOMCL9944	ORTHOMCL10642	ORTHOMCL7629	ORTHOMCL5291
ORTHOMCL7736	ORTHOMCL6948	ORTHOMCL5195	ORTHOMCL9122	ORTHOMCL9944	ORTHOMCL8088	ORTHOMCL10642	ORTHOMCL6007	ORTHOMCL10802	ORTHOMCL4798	ORTHOMCL7648
ORTHOMCL6247	ORTHOMCL7629	ORTHOMCL6007	ORTHOMCL8088	ORTHOMCL6007	ORTHOMCL7203	ORTHOMCL10802	ORTHOMCL6287	ORTHOMCL10333	ORTHOMCL10458	ORTHOMCL7736
ORTHOMCL9785	ORTHOMCL4798	ORTHOMCL6287	ORTHOMCL4593	ORTHOMCL5551	ORTHOMCL7084	ORTHOMCL10333	ORTHOMCL8635	ORTHOMCL5040	ORTHOMCL9062	ORTHOMCL6247
ORTHOMCL10692	ORTHOMCL10458	ORTHOMCL8635	ORTHOMCL10697	ORTHOMCL6287	ORTHOMCL4593	ORTHOMCL8463	ORTHOMCL6460	ORTHOMCL9848	ORTHOMCL4753	ORTHOMCL9785
ORTHOMCL5521	ORTHOMCL4753	ORTHOMCL6460	ORTHOMCL6914	ORTHOMCL8635	ORTHOMCL6914	ORTHOMCL9848	ORTHOMCL6854	ORTHOMCL4424	ORTHOMCL4969	ORTHOMCL10692
ORTHOMCL6825	ORTHOMCL10976	ORTHOMCL4552	ORTHOMCL8313	ORTHOMCL9288	ORTHOMCL8313	ORTHOMCL4424	ORTHOMCL7835	ORTHOMCL5862	ORTHOMCL5514	ORTHOMCL6792
ORTHOMCL6792	ORTHOMCL4969	ORTHOMCL9288	ORTHOMCL10969	ORTHOMCL6854	ORTHOMCL10969	ORTHOMCL5862	ORTHOMCL4430	ORTHOMCL5845	ORTHOMCL9447	ORTHOMCL5324
ORTHOMCL4429	ORTHOMCL5265	ORTHOMCL4648	ORTHOMCL7813	ORTHOMCL4430	ORTHOMCL7813	ORTHOMCL5845	ORTHOMCL8486	ORTHOMCL5195	ORTHOMCL4885	ORTHOMCL9456
ORTHOMCL5324	ORTHOMCL5438	ORTHOMCL6854	ORTHOMCL9987	ORTHOMCL7157	ORTHOMCL9987	ORTHOMCL5204	ORTHOMCL5291	ORTHOMCL9564	ORTHOMCL8079	ORTHOMCL8807
ORTHOMCL9456	ORTHOMCL6316	ORTHOMCL7835	ORTHOMCL8199	ORTHOMCL7167	ORTHOMCL8199	ORTHOMCL8039	ORTHOMCL6657	ORTHOMCL10462	ORTHOMCL5248	ORTHOMCL5803
ORTHOMCL4955	ORTHOMCL10353	ORTHOMCL4430	ORTHOMCL6948	ORTHOMCL7750	ORTHOMCL6948	ORTHOMCL5195	ORTHOMCL5675	ORTHOMCL9944	ORTHOMCL10663	ORTHOMCL7428
ORTHOMCL7428	ORTHOMCL4885	ORTHOMCL7157	ORTHOMCL4798	ORTHOMCL8486	ORTHOMCL4798	ORTHOMCL9564	ORTHOMCL7648	ORTHOMCL6287	ORTHOMCL6246	ORTHOMCL8099
ORTHOMCL8050	ORTHOMCL5025	ORTHOMCL8722	ORTHOMCL10458	ORTHOMCL5291	ORTHOMCL10458	ORTHOMCL10462	ORTHOMCL7736	ORTHOMCL8635	ORTHOMCL10333	ORTHOMCL9374
ORTHOMCL10932	ORTHOMCL8907	ORTHOMCL7648	ORTHOMCL10202	ORTHOMCL4718	ORTHOMCL10202	ORTHOMCL6007	ORTHOMCL6247	ORTHOMCL6460	ORTHOMCL5040	ORTHOMCL7030
ORTHOMCL4645	ORTHOMCL8079	ORTHOMCL7736	ORTHOMCL9062	ORTHOMCL6792	ORTHOMCL9062	ORTHOMCL6287	ORTHOMCL10692	ORTHOMCL6373	ORTHOMCL9848	ORTHOMCL4650
ORTHOMCL9374	ORTHOMCL5248	ORTHOMCL6247	ORTHOMCL4753	ORTHOMCL5324	ORTHOMCL4753	ORTHOMCL8635	ORTHOMCL4718	ORTHOMCL9288	ORTHOMCL4424	ORTHOMCL8278
ORTHOMCL7030	ORTHOMCL10663	ORTHOMCL10692	ORTHOMCL5001	ORTHOMCL10903	ORTHOMCL4969	ORTHOMCL6460	ORTHOMCL6792	ORTHOMCL4648	ORTHOMCL8116	ORTHOMCL5896
ORTHOMCL5367	ORTHOMCL10642	ORTHOMCL4718	ORTHOMCL4885	ORTHOMCL9456	ORTHOMCL5001	ORTHOMCL6854	ORTHOMCL5324	ORTHOMCL6854	ORTHOMCL5862	ORTHOMCL9286
ORTHOMCL5487	ORTHOMCL5769	ORTHOMCL4833	ORTHOMCL6330	ORTHOMCL8807	ORTHOMCL5514	ORTHOMCL7835	ORTHOMCL9456	ORTHOMCL7835	ORTHOMCL5195	ORTHOMCL10328
ORTHOMCL4650	ORTHOMCL10868	ORTHOMCL6792	ORTHOMCL7171	ORTHOMCL4955	ORTHOMCL9293	ORTHOMCL4430	ORTHOMCL8807	ORTHOMCL7167	ORTHOMCL9564	ORTHOMCL4610
ORTHOMCL8278	ORTHOMCL10802	ORTHOMCL6044	ORTHOMCL7244	ORTHOMCL7428	ORTHOMCL4885	ORTHOMCL7157	ORTHOMCL4955	ORTHOMCL6657	ORTHOMCL10462	ORTHOMCL10523
ORTHOMCL5896	ORTHOMCL10333	ORTHOMCL9456	ORTHOMCL8907	ORTHOMCL8050	ORTHOMCL10688	ORTHOMCL7167	ORTHOMCL7428	ORTHOMCL5675	ORTHOMCL9944	ORTHOMCL10956
ORTHOMCL10455	ORTHOMCL9848	ORTHOMCL8807	ORTHOMCL8079	ORTHOMCL9374	ORTHOMCL7171	ORTHOMCL5291	ORTHOMCL9374	ORTHOMCL7648	ORTHOMCL6287	ORTHOMCL7448
ORTHOMCL9286	ORTHOMCL4424	ORTHOMCL7428	ORTHOMCL5248	ORTHOMCL10986	ORTHOMCL7244	ORTHOMCL8722	ORTHOMCL7030	ORTHOMCL7736	ORTHOMCL8635	ORTHOMCL7194
ORTHOMCL10284	ORTHOMCL8039	ORTHOMCL9374	ORTHOMCL10663	ORTHOMCL7030	ORTHOMCL8907	ORTHOMCL7648	ORTHOMCL4650	ORTHOMCL6247	ORTHOMCL6460	ORTHOMCL4970
ORTHOMCL10328	ORTHOMCL9564	ORTHOMCL7030	ORTHOMCL6246	ORTHOMCL5968	ORTHOMCL8079	ORTHOMCL7736	ORTHOMCL8278	ORTHOMCL10692	ORTHOMCL4648	ORTHOMCL7145
ORTHOMCL10523	ORTHOMCL9944	ORTHOMCL8278	ORTHOMCL5630	ORTHOMCL8278	ORTHOMCL10663	ORTHOMCL6247	ORTHOMCL5896	ORTHOMCL4718	ORTHOMCL6854	ORTHOMCL9638
ORTHOMCL10956	ORTHOMCL6007	ORTHOMCL5896	ORTHOMCL10642	ORTHOMCL5896	ORTHOMCL6246	ORTHOMCL10692	ORTHOMCL10455	ORTHOMCL6792	ORTHOMCL7835	ORTHOMCL9273
ORTHOMCL9128	ORTHOMCL5551	ORTHOMCL10455	ORTHOMCL10868	ORTHOMCL10455	ORTHOMCL5630	ORTHOMCL4718	ORTHOMCL5477	ORTHOMCL6044	ORTHOMCL4430	ORTHOMCL9825
ORTHOMCL4970	ORTHOMCL9445	ORTHOMCL10284	ORTHOMCL10802	ORTHOMCL9286	ORTHOMCL10868	ORTHOMCL6825	ORTHOMCL10328	ORTHOMCL9456	ORTHOMCL7167	ORTHOMCL8063
ORTHOMCL7145	ORTHOMCL8635	ORTHOMCL10328	ORTHOMCL10333	ORTHOMCL5477	ORTHOMCL10802	ORTHOMCL8096	ORTHOMCL10523	ORTHOMCL8807	ORTHOMCL7750	ORTHOMCL5501
ORTHOMCL9638	ORTHOMCL8570	ORTHOMCL10523	ORTHOMCL5040	ORTHOMCL10328	ORTHOMCL10333	ORTHOMCL6792	ORTHOMCL10956	ORTHOMCL7428	ORTHOMCL8722	ORTHOMCL7881
ORTHOMCL9825	ORTHOMCL8886	ORTHOMCL10956	ORTHOMCL9848	ORTHOMCL10956	ORTHOMCL5040	ORTHOMCL5324	ORTHOMCL7194	ORTHOMCL9374	ORTHOMCL7648	ORTHOMCL7042
ORTHOMCL8330	ORTHOMCL4648	ORTHOMCL7194	ORTHOMCL4424	ORTHOMCL7194	ORTHOMCL9848	ORTHOMCL9456	ORTHOMCL4970	ORTHOMCL7030	ORTHOMCL7736	ORTHOMCL7792
ORTHOMCL5501	ORTHOMCL6854	ORTHOMCL4970	ORTHOMCL5862	ORTHOMCL4970	ORTHOMCL4424	ORTHOMCL8807	ORTHOMCL7145	ORTHOMCL4650	ORTHOMCL6247	ORTHOMCL5170
ORTHOMCL6964	ORTHOMCL7835	ORTHOMCL7145	ORTHOMCL5845	ORTHOMCL7145	ORTHOMCL5862	ORTHOMCL7428	ORTHOMCL9638	ORTHOMCL8278	ORTHOMCL10692	ORTHOMCL6578
ORTHOMCL9077	ORTHOMCL4430	ORTHOMCL9638	ORTHOMCL5204	ORTHOMCL9825	ORTHOMCL5845	ORTHOMCL8099	ORTHOMCL9825	ORTHOMCL5896	ORTHOMCL4718	ORTHOMCL10441
ORTHOMCL5170	ORTHOMCL7750	ORTHOMCL9825	ORTHOMCL5195	ORTHOMCL5501	ORTHOMCL8039	ORTHOMCL9374	ORTHOMCL8063	ORTHOMCL10455	ORTHOMCL6792	ORTHOMCL6605
ORTHOMCL7535	ORTHOMCL8486	ORTHOMCL7042	ORTHOMCL10462	ORTHOMCL7792	ORTHOMCL5195	ORTHOMCL7030	ORTHOMCL5501	ORTHOMCL9286	ORTHOMCL5324	ORTHOMCL9537
ORTHOMCL10441	ORTHOMCL5291	ORTHOMCL7792	ORTHOMCL6007	ORTHOMCL5170	ORTHOMCL9564	ORTHOMCL4650	ORTHOMCL7881	ORTHOMCL5477	ORTHOMCL6044	ORTHOMCL5848
ORTHOMCL6605	ORTHOMCL7254	ORTHOMCL5170	ORTHOMCL6287	ORTHOMCL8368	ORTHOMCL10462	ORTHOMCL8278	ORTHOMCL7042	ORTHOMCL10328	ORTHOMCL9456	ORTHOMCL5424
ORTHOMCL8022	ORTHOMCL7736	ORTHOMCL10441	ORTHOMCL8635	ORTHOMCL10441	ORTHOMCL6007	ORTHOMCL5896	ORTHOMCL6964	ORTHOMCL4610	ORTHOMCL8807	ORTHOMCL5524
ORTHOMCL9537	ORTHOMCL10692	ORTHOMCL6605	ORTHOMCL6460	ORTHOMCL6605	ORTHOMCL6287	ORTHOMCL10455	ORTHOMCL7792	ORTHOMCL10523	ORTHOMCL7428	ORTHOMCL5185
ORTHOMCL7555	ORTHOMCL4718	ORTHOMCL5990	ORTHOMCL9288	ORTHOMCL5990	ORTHOMCL8635	ORTHOMCL10284	ORTHOMCL5170	ORTHOMCL10956	ORTHOMCL9374	ORTHOMCL10077
ORTHOMCL5257	ORTHOMCL10307	ORTHOMCL9537	ORTHOMCL6854	ORTHOMCL9537	ORTHOMCL6460	ORTHOMCL5477	ORTHOMCL10441	ORTHOMCL7448	ORTHOMCL7030	ORTHOMCL8958
ORTHOMCL5424	ORTHOMCL4429	ORTHOMCL5848	ORTHOMCL7850	ORTHOMCL5848	ORTHOMCL4552	ORTHOMCL10328	ORTHOMCL6605	ORTHOMCL7194	ORTHOMCL8278	ORTHOMCL5796
ORTHOMCL10304	ORTHOMCL5324	ORTHOMCL5524	ORTHOMCL7835	ORTHOMCL6139	ORTHOMCL9288	ORTHOMCL10956	ORTHOMCL9537	ORTHOMCL4970	ORTHOMCL5896	ORTHOMCL5636
ORTHOMCL5524	ORTHOMCL10903	ORTHOMCL9218	ORTHOMCL4399	ORTHOMCL5524	ORTHOMCL6854	ORTHOMCL7448	ORTHOMCL5848	ORTHOMCL7145	ORTHOMCL10455	ORTHOMCL8940
ORTHOMCL10077	ORTHOMCL8807	ORTHOMCL10077	ORTHOMCL4430	ORTHOMCL9218	ORTHOMCL7835	ORTHOMCL7194	ORTHOMCL5524	ORTHOMCL9638	ORTHOMCL10481	ORTHOMCL8387
ORTHOMCL5636	ORTHOMCL4955	ORTHOMCL8958	ORTHOMCL7157	ORTHOMCL10077	ORTHOMCL4430	ORTHOMCL4970	ORTHOMCL10077	ORTHOMCL8063	ORTHOMCL7152	ORTHOMCL7604
ORTHOMCL7511	ORTHOMCL7428	ORTHOMCL5796	ORTHOMCL7167	ORTHOMCL8958	ORTHOMCL7167	ORTHOMCL7145	ORTHOMCL10613	ORTHOMCL5501	ORTHOMCL10328	ORTHOMCL7511
ORTHOMCL6078	ORTHOMCL10932	ORTHOMCL5636	ORTHOMCL6657	ORTHOMCL9096	ORTHOMCL8722	ORTHOMCL9638	ORTHOMCL8958	ORTHOMCL7881	ORTHOMCL10972	ORTHOMCL6688
ORTHOMCL6688	ORTHOMCL4645	ORTHOMCL8387	ORTHOMCL8722	ORTHOMCL5636	ORTHOMCL7648	ORTHOMCL9825	ORTHOMCL5796	ORTHOMCL7042	ORTHOMCL10956	ORTHOMCL9575
ORTHOMCL9575	ORTHOMCL9374	ORTHOMCL7604	ORTHOMCL7648	ORTHOMCL8387	ORTHOMCL7736	ORTHOMCL8063	ORTHOMCL5636	ORTHOMCL7792	ORTHOMCL7194	ORTHOMCL4850
ORTHOMCL6667	ORTHOMCL10986	ORTHOMCL7511	ORTHOMCL7736	ORTHOMCL7604	ORTHOMCL6247	ORTHOMCL4995	ORTHOMCL8940	ORTHOMCL5170	ORTHOMCL4970	ORTHOMCL6310
ORTHOMCL7565	ORTHOMCL7030	ORTHOMCL5573	ORTHOMCL6247	ORTHOMCL7511	ORTHOMCL10692	ORTHOMCL7528	ORTHOMCL8387	ORTHOMCL10441	ORTHOMCL10834	ORTHOMCL9979
ORTHOMCL6310	ORTHOMCL5367	ORTHOMCL9575	ORTHOMCL10692	ORTHOMCL5573	ORTHOMCL4833	ORTHOMCL7042	ORTHOMCL10024	ORTHOMCL6605	ORTHOMCL7145	ORTHOMCL8671
ORTHOMCL6054	ORTHOMCL10187	ORTHOMCL4850	ORTHOMCL4718	ORTHOMCL5048	ORTHOMCL6792	ORTHOMCL5170	ORTHOMCL7604	ORTHOMCL5990	ORTHOMCL9273	ORTHOMCL6456
ORTHOMCL5965	ORTHOMCL7111	ORTHOMCL6310	ORTHOMCL4833	ORTHOMCL6078	ORTHOMCL5324	ORTHOMCL10441	ORTHOMCL7511	ORTHOMCL9537	ORTHOMCL9825	ORTHOMCL4401
ORTHOMCL7852	ORTHOMCL8278	ORTHOMCL4401	ORTHOMCL6792	ORTHOMCL9575	ORTHOMCL6044	ORTHOMCL6605	ORTHOMCL5573	ORTHOMCL5848	ORTHOMCL7528	ORTHOMCL5213
ORTHOMCL5815	ORTHOMCL5896	ORTHOMCL6054	ORTHOMCL5324	ORTHOMCL4850	ORTHOMCL9456	ORTHOMCL8022	ORTHOMCL6688	ORTHOMCL5424	ORTHOMCL7042	ORTHOMCL6054
ORTHOMCL4782	ORTHOMCL10455	ORTHOMCL4588	ORTHOMCL6044	ORTHOMCL9979	ORTHOMCL8807	ORTHOMCL9537	ORTHOMCL9575	ORTHOMCL5524	ORTHOMCL6964	ORTHOMCL4588
ORTHOMCL7505	ORTHOMCL10328	ORTHOMCL5965	ORTHOMCL9456	ORTHOMCL6054	ORTHOMCL7428	ORTHOMCL5848	ORTHOMCL4850	ORTHOMCL10077	ORTHOMCL7792	ORTHOMCL5965
ORTHOMCL7302	ORTHOMCL4610	ORTHOMCL7852	ORTHOMCL8807	ORTHOMCL4588	ORTHOMCL9374	ORTHOMCL5524	ORTHOMCL6310	ORTHOMCL8958	ORTHOMCL5170	ORTHOMCL7852
ORTHOMCL5106	ORTHOMCL10523	ORTHOMCL5144	ORTHOMCL5803	ORTHOMCL5965	ORTHOMCL7030	ORTHOMCL10077	ORTHOMCL9979	ORTHOMCL5796	ORTHOMCL6578	ORTHOMCL5815
ORTHOMCL7748	ORTHOMCL10956	ORTHOMCL5815	ORTHOMCL7428	ORTHOMCL7852	ORTHOMCL7111	ORTHOMCL8958	ORTHOMCL6054	ORTHOMCL5636	ORTHOMCL10441	ORTHOMCL4782
ORTHOMCL10394	ORTHOMCL7448	ORTHOMCL4782	ORTHOMCL9374	ORTHOMCL5815	ORTHOMCL4650	ORTHOMCL6877	ORTHOMCL4588	ORTHOMCL8387	ORTHOMCL6605	ORTHOMCL7748
ORTHOMCL8954	ORTHOMCL9128	ORTHOMCL8339	ORTHOMCL7030	ORTHOMCL8339	ORTHOMCL8278	ORTHOMCL5636	ORTHOMCL7852	ORTHOMCL10024	ORTHOMCL9537	ORTHOMCL8569
ORTHOMCL9231	ORTHOMCL4970	ORTHOMCL4786	ORTHOMCL8278	ORTHOMCL7302	ORTHOMCL5896	ORTHOMCL8387	ORTHOMCL5815	ORTHOMCL7604	ORTHOMCL5848	ORTHOMCL4983
ORTHOMCL4993	ORTHOMCL7145	ORTHOMCL4983	ORTHOMCL5896	ORTHOMCL4786	ORTHOMCL10455	ORTHOMCL7604	ORTHOMCL4782	ORTHOMCL7511	ORTHOMCL6139	ORTHOMCL4642
ORTHOMCL9354	ORTHOMCL9825	ORTHOMCL9231	ORTHOMCL10956	ORTHOMCL7748	ORTHOMCL10328	ORTHOMCL7511	ORTHOMCL8339	ORTHOMCL5573	ORTHOMCL5424	ORTHOMCL9231
ORTHOMCL10047	ORTHOMCL5501	ORTHOMCL8759	ORTHOMCL7194	ORTHOMCL8836	ORTHOMCL10956	ORTHOMCL5048	ORTHOMCL7748	ORTHOMCL6688	ORTHOMCL5524	ORTHOMCL4993
ORTHOMCL7628	ORTHOMCL7681	ORTHOMCL10047	ORTHOMCL4970	ORTHOMCL4983	ORTHOMCL7448	ORTHOMCL6688	ORTHOMCL8569	ORTHOMCL9575	ORTHOMCL5185	ORTHOMCL10047
ORTHOMCL5975	ORTHOMCL5837	ORTHOMCL5497	ORTHOMCL7145	ORTHOMCL4642	ORTHOMCL7194	ORTHOMCL9575	ORTHOMCL4642	ORTHOMCL4850	ORTHOMCL9218	ORTHOMCL9741
ORTHOMCL6218	ORTHOMCL7792	ORTHOMCL7087	ORTHOMCL9638	ORTHOMCL10510	ORTHOMCL4970	ORTHOMCL4850	ORTHOMCL4993	ORTHOMCL6310	ORTHOMCL10077	ORTHOMCL7558
ORTHOMCL7644	ORTHOMCL8630	ORTHOMCL7558	ORTHOMCL9273	ORTHOMCL9231	ORTHOMCL7145	ORTHOMCL6310	ORTHOMCL10047	ORTHOMCL9979	ORTHOMCL8958	ORTHOMCL7949
ORTHOMCL5000	ORTHOMCL9077	ORTHOMCL5000	ORTHOMCL9825	ORTHOMCL4993	ORTHOMCL9638	ORTHOMCL9979	ORTHOMCL7087	ORTHOMCL8671	ORTHOMCL5636	ORTHOMCL8026
ORTHOMCL8519	ORTHOMCL6549	ORTHOMCL8026	ORTHOMCL8063	ORTHOMCL8759	ORTHOMCL9273	ORTHOMCL4401	ORTHOMCL9741	ORTHOMCL6456	ORTHOMCL8387	ORTHOMCL6897
ORTHOMCL6897	ORTHOMCL10441	ORTHOMCL6897	ORTHOMCL7881	ORTHOMCL4617	ORTHOMCL9825	ORTHOMCL5213	ORTHOMCL7558	ORTHOMCL6054	ORTHOMCL7604	ORTHOMCL4663
ORTHOMCL4663	ORTHOMCL10299	ORTHOMCL4663	ORTHOMCL7042	ORTHOMCL10047	ORTHOMCL5501	ORTHOMCL6054	ORTHOMCL5269	ORTHOMCL7852	ORTHOMCL7511	ORTHOMCL6168
ORTHOMCL6168	ORTHOMCL5990	ORTHOMCL6168	ORTHOMCL7792	ORTHOMCL7628	ORTHOMCL7881	ORTHOMCL4588	ORTHOMCL5000	ORTHOMCL8339	ORTHOMCL5048	ORTHOMCL8959
ORTHOMCL8959	ORTHOMCL8022	ORTHOMCL8959	ORTHOMCL5170	ORTHOMCL9741	ORTHOMCL7042	ORTHOMCL5965	ORTHOMCL6421	ORTHOMCL10715	ORTHOMCL6078	ORTHOMCL9471
ORTHOMCL4774	ORTHOMCL9537	ORTHOMCL4774	ORTHOMCL10441	ORTHOMCL5000	ORTHOMCL5170	ORTHOMCL7852	ORTHOMCL8026	ORTHOMCL7748	ORTHOMCL6688	ORTHOMCL9410
ORTHOMCL9410	ORTHOMCL5848	ORTHOMCL10550	ORTHOMCL6605	ORTHOMCL6421	ORTHOMCL6578	ORTHOMCL5144	ORTHOMCL6897	ORTHOMCL4642	ORTHOMCL9575	ORTHOMCL6927
ORTHOMCL10610	ORTHOMCL5257	ORTHOMCL9471	ORTHOMCL9537	ORTHOMCL8026	ORTHOMCL6605	ORTHOMCL5815	ORTHOMCL6168	ORTHOMCL9231	ORTHOMCL4850	ORTHOMCL10912
ORTHOMCL6927	ORTHOMCL9218	ORTHOMCL6927	ORTHOMCL5848	ORTHOMCL4546	ORTHOMCL9537	ORTHOMCL8339	ORTHOMCL8959	ORTHOMCL4993	ORTHOMCL6310	ORTHOMCL5901
ORTHOMCL8944	ORTHOMCL4639	ORTHOMCL10912	ORTHOMCL5524	ORTHOMCL6897	ORTHOMCL5848	ORTHOMCL4786	ORTHOMCL4774	ORTHOMCL10047	ORTHOMCL8671	ORTHOMCL10746
ORTHOMCL10912	ORTHOMCL4565	ORTHOMCL10746	ORTHOMCL10077	ORTHOMCL4663	ORTHOMCL5524	ORTHOMCL7748	ORTHOMCL9471	ORTHOMCL7087	ORTHOMCL10268	ORTHOMCL10807
ORTHOMCL6196	ORTHOMCL10077	ORTHOMCL10807	ORTHOMCL8958	ORTHOMCL6168	ORTHOMCL10077	ORTHOMCL4983	ORTHOMCL9410	ORTHOMCL9741	ORTHOMCL5213	ORTHOMCL10034
ORTHOMCL10746	ORTHOMCL5636	ORTHOMCL10034	ORTHOMCL5796	ORTHOMCL8959	ORTHOMCL10613	ORTHOMCL9231	ORTHOMCL6927	ORTHOMCL7949	ORTHOMCL4588	ORTHOMCL4686
ORTHOMCL10807	ORTHOMCL8940	ORTHOMCL4686	ORTHOMCL5636	ORTHOMCL4774	ORTHOMCL10313	ORTHOMCL4993	ORTHOMCL10912	ORTHOMCL5269	ORTHOMCL5965	ORTHOMCL10973
ORTHOMCL4686	ORTHOMCL7604	ORTHOMCL10973	ORTHOMCL9133	ORTHOMCL9471	ORTHOMCL8958	ORTHOMCL8759	ORTHOMCL5901	ORTHOMCL5000	ORTHOMCL5144	ORTHOMCL10021
ORTHOMCL10973	ORTHOMCL6622	ORTHOMCL6299	ORTHOMCL8387	ORTHOMCL6927	ORTHOMCL5796	ORTHOMCL10047	ORTHOMCL10746	ORTHOMCL6421	ORTHOMCL5815	ORTHOMCL6299
ORTHOMCL10021	ORTHOMCL5048	ORTHOMCL4522	ORTHOMCL7604	ORTHOMCL10912	ORTHOMCL5636	ORTHOMCL7087	ORTHOMCL10807	ORTHOMCL8026	ORTHOMCL8339	ORTHOMCL4522
ORTHOMCL4522	ORTHOMCL9575	ORTHOMCL10922	ORTHOMCL7511	ORTHOMCL10746	ORTHOMCL8387	ORTHOMCL9741	ORTHOMCL10034	ORTHOMCL4546	ORTHOMCL4786	ORTHOMCL10922
ORTHOMCL10404	ORTHOMCL4850	ORTHOMCL10404	ORTHOMCL5048	ORTHOMCL10807	ORTHOMCL10024	ORTHOMCL7558	ORTHOMCL10973	ORTHOMCL6897	ORTHOMCL7748	ORTHOMCL10404
ORTHOMCL7339	ORTHOMCL4905	ORTHOMCL7572	ORTHOMCL6688	ORTHOMCL10034	ORTHOMCL7604	ORTHOMCL5000	ORTHOMCL10021	ORTHOMCL4663	ORTHOMCL8686	ORTHOMCL7339
ORTHOMCL8030	ORTHOMCL5459	ORTHOMCL5876	ORTHOMCL9575	ORTHOMCL4686	ORTHOMCL7511	ORTHOMCL6421	ORTHOMCL6299	ORTHOMCL6168	ORTHOMCL4983	ORTHOMCL8030
ORTHOMCL8451	ORTHOMCL9979	ORTHOMCL10141	ORTHOMCL4850	ORTHOMCL9485	ORTHOMCL5573	ORTHOMCL8026	ORTHOMCL4522	ORTHOMCL8959	ORTHOMCL9649	ORTHOMCL9889
ORTHOMCL10545	ORTHOMCL8671	ORTHOMCL7996	ORTHOMCL6310	ORTHOMCL6451	ORTHOMCL5048	ORTHOMCL4546	ORTHOMCL10922	ORTHOMCL4774	ORTHOMCL4993	ORTHOMCL5876
ORTHOMCL8020	ORTHOMCL6456	ORTHOMCL6051	ORTHOMCL8671	ORTHOMCL10973	ORTHOMCL9575	ORTHOMCL6897	ORTHOMCL10404	ORTHOMCL9471	ORTHOMCL4617	ORTHOMCL8451
ORTHOMCL10141	ORTHOMCL10268	ORTHOMCL8724	ORTHOMCL6054	ORTHOMCL6299	ORTHOMCL4850	ORTHOMCL4663	ORTHOMCL7339	ORTHOMCL9410	ORTHOMCL10047	ORTHOMCL7811
ORTHOMCL7996	ORTHOMCL6054	ORTHOMCL5478	ORTHOMCL4588	ORTHOMCL4522	ORTHOMCL5459	ORTHOMCL6168	ORTHOMCL8030	ORTHOMCL6927	ORTHOMCL5975	ORTHOMCL10141
ORTHOMCL6161	ORTHOMCL5965	ORTHOMCL4769	ORTHOMCL7852	ORTHOMCL10922	ORTHOMCL6310	ORTHOMCL8959	ORTHOMCL7572	ORTHOMCL10746	ORTHOMCL7949	ORTHOMCL7996
ORTHOMCL8724	ORTHOMCL5815	ORTHOMCL4484	ORTHOMCL4782	ORTHOMCL10404	ORTHOMCL6456	ORTHOMCL9471	ORTHOMCL9889	ORTHOMCL10807	ORTHOMCL5000	ORTHOMCL6051
ORTHOMCL5478	ORTHOMCL7505	ORTHOMCL7980	ORTHOMCL8339	ORTHOMCL7339	ORTHOMCL4401	ORTHOMCL9410	ORTHOMCL5876	ORTHOMCL10034	ORTHOMCL6421	ORTHOMCL8724
ORTHOMCL4769	ORTHOMCL8339	ORTHOMCL9780	ORTHOMCL4983	ORTHOMCL8030	ORTHOMCL5213	ORTHOMCL6927	ORTHOMCL8451	ORTHOMCL4686	ORTHOMCL8026	ORTHOMCL5478
ORTHOMCL7387	ORTHOMCL7077	ORTHOMCL9399	ORTHOMCL4642	ORTHOMCL9889	ORTHOMCL6054	ORTHOMCL10912	ORTHOMCL10141	ORTHOMCL10973	ORTHOMCL4546	ORTHOMCL4769
ORTHOMCL5247	ORTHOMCL7302	ORTHOMCL7880	ORTHOMCL9649	ORTHOMCL5876	ORTHOMCL4588	ORTHOMCL6196	ORTHOMCL7996	ORTHOMCL6299	ORTHOMCL6897	ORTHOMCL7980
ORTHOMCL6664	ORTHOMCL7856	ORTHOMCL5561	ORTHOMCL9231	ORTHOMCL10141	ORTHOMCL7852	ORTHOMCL5901	ORTHOMCL5808	ORTHOMCL4522	ORTHOMCL4663	ORTHOMCL9780
ORTHOMCL7966	ORTHOMCL5836	ORTHOMCL6108	ORTHOMCL4993	ORTHOMCL10567	ORTHOMCL5144	ORTHOMCL10746	ORTHOMCL6051	ORTHOMCL10922	ORTHOMCL6168	ORTHOMCL9399
ORTHOMCL8599	ORTHOMCL5125	ORTHOMCL9894	ORTHOMCL8759	ORTHOMCL7996	ORTHOMCL5815	ORTHOMCL10807	ORTHOMCL8724	ORTHOMCL10404	ORTHOMCL8959	ORTHOMCL7880
ORTHOMCL6292	ORTHOMCL7748	ORTHOMCL7899	ORTHOMCL10047	ORTHOMCL6051	ORTHOMCL8339	ORTHOMCL10034	ORTHOMCL4769	ORTHOMCL7339	ORTHOMCL4774	ORTHOMCL5561
ORTHOMCL6108	ORTHOMCL4521	ORTHOMCL7326	ORTHOMCL7087	ORTHOMCL4484	ORTHOMCL7748	ORTHOMCL4686	ORTHOMCL4484	ORTHOMCL8030	ORTHOMCL9471	ORTHOMCL6292
ORTHOMCL7899	ORTHOMCL8569	ORTHOMCL9023	ORTHOMCL9741	ORTHOMCL5429	ORTHOMCL4983	ORTHOMCL10973	ORTHOMCL7980	ORTHOMCL7572	ORTHOMCL9410	ORTHOMCL7326
ORTHOMCL9213	ORTHOMCL4634	ORTHOMCL8636	ORTHOMCL7558	ORTHOMCL7980	ORTHOMCL9231	ORTHOMCL6299	ORTHOMCL9780	ORTHOMCL9889	ORTHOMCL6927	ORTHOMCL8636
ORTHOMCL9975	ORTHOMCL8581	ORTHOMCL7246	ORTHOMCL5000	ORTHOMCL4602	ORTHOMCL4993	ORTHOMCL4522	ORTHOMCL5039	ORTHOMCL5876	ORTHOMCL10746	ORTHOMCL7246
ORTHOMCL4855	ORTHOMCL9649	ORTHOMCL9975	ORTHOMCL10444	ORTHOMCL9780	ORTHOMCL10047	ORTHOMCL10922	ORTHOMCL7880	ORTHOMCL6916	ORTHOMCL10807	ORTHOMCL9975
ORTHOMCL4980	ORTHOMCL7156	ORTHOMCL4855	ORTHOMCL6421	ORTHOMCL9399	ORTHOMCL7087	ORTHOMCL10404	ORTHOMCL6292	ORTHOMCL8020	ORTHOMCL10034	ORTHOMCL4855
ORTHOMCL9918	ORTHOMCL9231	ORTHOMCL4980	ORTHOMCL8026	ORTHOMCL8970	ORTHOMCL9741	ORTHOMCL7339	ORTHOMCL9894	ORTHOMCL10141	ORTHOMCL4686	ORTHOMCL4980
ORTHOMCL9875	ORTHOMCL9354	ORTHOMCL5421	ORTHOMCL4546	ORTHOMCL9894	ORTHOMCL7558	ORTHOMCL8030	ORTHOMCL8636	ORTHOMCL7996	ORTHOMCL10973	ORTHOMCL7478
ORTHOMCL9202	ORTHOMCL10047	ORTHOMCL9875	ORTHOMCL6897	ORTHOMCL7899	ORTHOMCL7949	ORTHOMCL7572	ORTHOMCL9213	ORTHOMCL6051	ORTHOMCL10021	ORTHOMCL6600
ORTHOMCL6886	ORTHOMCL7087	ORTHOMCL5816	ORTHOMCL4663	ORTHOMCL7566	ORTHOMCL5269	ORTHOMCL5876	ORTHOMCL9975	ORTHOMCL8724	ORTHOMCL6299	ORTHOMCL9875
ORTHOMCL6270	ORTHOMCL7558	ORTHOMCL9202	ORTHOMCL6168	ORTHOMCL8636	ORTHOMCL5000	ORTHOMCL8451	ORTHOMCL9846	ORTHOMCL4769	ORTHOMCL4522	ORTHOMCL5816
ORTHOMCL6010	ORTHOMCL7785	ORTHOMCL8189	ORTHOMCL8959	ORTHOMCL9213	ORTHOMCL6421	ORTHOMCL8020	ORTHOMCL4855	ORTHOMCL4484	ORTHOMCL10922	ORTHOMCL9202
ORTHOMCL6145	ORTHOMCL9045	ORTHOMCL8008	ORTHOMCL4774	ORTHOMCL9975	ORTHOMCL8026	ORTHOMCL10141	ORTHOMCL4980	ORTHOMCL7980	ORTHOMCL10404	ORTHOMCL8189
ORTHOMCL6446	ORTHOMCL7644	ORTHOMCL7808	ORTHOMCL9471	ORTHOMCL4855	ORTHOMCL4546	ORTHOMCL7996	ORTHOMCL7478	ORTHOMCL9399	ORTHOMCL7339	ORTHOMCL8008
ORTHOMCL7165	ORTHOMCL8029	ORTHOMCL10220	ORTHOMCL6927	ORTHOMCL4980	ORTHOMCL6897	ORTHOMCL6051	ORTHOMCL5421	ORTHOMCL5847	ORTHOMCL8030	ORTHOMCL7808
ORTHOMCL4386	ORTHOMCL8026	ORTHOMCL6010	ORTHOMCL10912	ORTHOMCL4904	ORTHOMCL4663	ORTHOMCL8724	ORTHOMCL9875	ORTHOMCL7880	ORTHOMCL9889	ORTHOMCL10220
ORTHOMCL7216	ORTHOMCL4546	ORTHOMCL6145	ORTHOMCL10746	ORTHOMCL7478	ORTHOMCL6168	ORTHOMCL5478	ORTHOMCL5816	ORTHOMCL5561	ORTHOMCL5876	ORTHOMCL7780
ORTHOMCL9992	ORTHOMCL4771	ORTHOMCL9086	ORTHOMCL10807	ORTHOMCL7779	ORTHOMCL8959	ORTHOMCL4769	ORTHOMCL9202	ORTHOMCL6292	ORTHOMCL8020	ORTHOMCL8967
ORTHOMCL10638	ORTHOMCL4663	ORTHOMCL6946	ORTHOMCL10034	ORTHOMCL6600	ORTHOMCL9471	ORTHOMCL4484	ORTHOMCL8189	ORTHOMCL6108	ORTHOMCL10141	ORTHOMCL6010
ORTHOMCL9001	ORTHOMCL6168	ORTHOMCL7995	ORTHOMCL4686	ORTHOMCL8628	ORTHOMCL9410	ORTHOMCL7980	ORTHOMCL8008	ORTHOMCL7326	ORTHOMCL7996	ORTHOMCL6145
ORTHOMCL7367	ORTHOMCL8959	ORTHOMCL6446	ORTHOMCL10973	ORTHOMCL9875	ORTHOMCL6927	ORTHOMCL9780	ORTHOMCL7808	ORTHOMCL8636	ORTHOMCL6051	ORTHOMCL4417
ORTHOMCL10819	ORTHOMCL8367	ORTHOMCL7165	ORTHOMCL10021	ORTHOMCL5816	ORTHOMCL10912	ORTHOMCL7880	ORTHOMCL10220	ORTHOMCL7246	ORTHOMCL8724	ORTHOMCL9086
ORTHOMCL10614	ORTHOMCL4774	ORTHOMCL9992	ORTHOMCL6299	ORTHOMCL9202	ORTHOMCL10746	ORTHOMCL6292	ORTHOMCL7780	ORTHOMCL9975	ORTHOMCL4769	ORTHOMCL6946
ORTHOMCL9673	ORTHOMCL10746	ORTHOMCL6655	ORTHOMCL4522	ORTHOMCL8008	ORTHOMCL10807	ORTHOMCL6108	ORTHOMCL8967	ORTHOMCL4855	ORTHOMCL4484	ORTHOMCL7995
ORTHOMCL4803	ORTHOMCL5223	ORTHOMCL10638	ORTHOMCL10922	ORTHOMCL6886	ORTHOMCL10034	ORTHOMCL9894	ORTHOMCL6010	ORTHOMCL4980	ORTHOMCL7980	ORTHOMCL7165
ORTHOMCL7843	ORTHOMCL10807	ORTHOMCL4985	ORTHOMCL10404	ORTHOMCL7780	ORTHOMCL4686	ORTHOMCL7899	ORTHOMCL6145	ORTHOMCL6600	ORTHOMCL9780	ORTHOMCL6655
ORTHOMCL7630	ORTHOMCL10034	ORTHOMCL10790	ORTHOMCL8030	ORTHOMCL8967	ORTHOMCL10973	ORTHOMCL10605	ORTHOMCL9086	ORTHOMCL9875	ORTHOMCL9399	ORTHOMCL7670
ORTHOMCL9130	ORTHOMCL4686	ORTHOMCL10819	ORTHOMCL7130	ORTHOMCL6010	ORTHOMCL6299	ORTHOMCL7326	ORTHOMCL6946	ORTHOMCL9202	ORTHOMCL7880	ORTHOMCL5141
ORTHOMCL9946	ORTHOMCL4582	ORTHOMCL6651	ORTHOMCL5876	ORTHOMCL9086	ORTHOMCL4522	ORTHOMCL8636	ORTHOMCL6446	ORTHOMCL8189	ORTHOMCL5561	ORTHOMCL10638
ORTHOMCL6699	ORTHOMCL10973	ORTHOMCL9673	ORTHOMCL8020	ORTHOMCL6946	ORTHOMCL10922	ORTHOMCL7246	ORTHOMCL7165	ORTHOMCL8008	ORTHOMCL6108	ORTHOMCL6730
ORTHOMCL7429	ORTHOMCL10021	ORTHOMCL4690	ORTHOMCL10141	ORTHOMCL6446	ORTHOMCL10404	ORTHOMCL9975	ORTHOMCL6655	ORTHOMCL7808	ORTHOMCL7899	ORTHOMCL4985
ORTHOMCL7622	ORTHOMCL10922	ORTHOMCL9130	ORTHOMCL7996	ORTHOMCL7165	ORTHOMCL7339	ORTHOMCL10098	ORTHOMCL5141	ORTHOMCL10220	ORTHOMCL7326	ORTHOMCL6690
ORTHOMCL7753	ORTHOMCL10404	ORTHOMCL7583	ORTHOMCL6051	ORTHOMCL8670	ORTHOMCL8030	ORTHOMCL4855	ORTHOMCL10638	ORTHOMCL7780	ORTHOMCL8636	ORTHOMCL4708
ORTHOMCL4681	ORTHOMCL8030	ORTHOMCL9946	ORTHOMCL8724	ORTHOMCL4985	ORTHOMCL7572	ORTHOMCL4980	ORTHOMCL10790	ORTHOMCL8967	ORTHOMCL9213	ORTHOMCL10790
ORTHOMCL6071	ORTHOMCL7572	ORTHOMCL6699	ORTHOMCL5478	ORTHOMCL6690	ORTHOMCL7130	ORTHOMCL9875	ORTHOMCL10819	ORTHOMCL6010	ORTHOMCL7246	ORTHOMCL10819
ORTHOMCL9719	ORTHOMCL9889	ORTHOMCL7429	ORTHOMCL4769	ORTHOMCL10819	ORTHOMCL5876	ORTHOMCL5816	ORTHOMCL6651	ORTHOMCL4549	ORTHOMCL9975	ORTHOMCL4674
ORTHOMCL10048	ORTHOMCL10223	ORTHOMCL4945	ORTHOMCL4484	ORTHOMCL6651	ORTHOMCL8020	ORTHOMCL9202	ORTHOMCL7412	ORTHOMCL6145	ORTHOMCL10098	ORTHOMCL9673
ORTHOMCL8258	ORTHOMCL8451	ORTHOMCL9993	ORTHOMCL7980	ORTHOMCL9673	ORTHOMCL10141	ORTHOMCL8189	ORTHOMCL9673	ORTHOMCL9086	ORTHOMCL4855	ORTHOMCL9130
ORTHOMCL7441	ORTHOMCL7996	ORTHOMCL7753	ORTHOMCL9399	ORTHOMCL10429	ORTHOMCL7996	ORTHOMCL8008	ORTHOMCL4690	ORTHOMCL6946	ORTHOMCL4980	ORTHOMCL9946
ORTHOMCL10368	ORTHOMCL7103	ORTHOMCL9503	ORTHOMCL5561	ORTHOMCL4803	ORTHOMCL6051	ORTHOMCL7808	ORTHOMCL9130	ORTHOMCL6446	ORTHOMCL4904	ORTHOMCL6699
ORTHOMCL10968	ORTHOMCL6161	ORTHOMCL9719	ORTHOMCL6292	ORTHOMCL9130	ORTHOMCL8724	ORTHOMCL10220	ORTHOMCL9946	ORTHOMCL7292	ORTHOMCL6600	ORTHOMCL4945
ORTHOMCL7214	ORTHOMCL6051	ORTHOMCL9648	ORTHOMCL6108	ORTHOMCL7583	ORTHOMCL5478	ORTHOMCL8967	ORTHOMCL6699	ORTHOMCL7165	ORTHOMCL9875	ORTHOMCL6791
ORTHOMCL4636	ORTHOMCL5478	ORTHOMCL10048	ORTHOMCL9894	ORTHOMCL9946	ORTHOMCL4769	ORTHOMCL6010	ORTHOMCL4945	ORTHOMCL9992	ORTHOMCL5816	ORTHOMCL9993
ORTHOMCL4643	ORTHOMCL5247	ORTHOMCL7441	ORTHOMCL7899	ORTHOMCL6699	ORTHOMCL4484	ORTHOMCL6145	ORTHOMCL7753	ORTHOMCL6655	ORTHOMCL9202	ORTHOMCL7753
ORTHOMCL6378	ORTHOMCL5455	ORTHOMCL6357	ORTHOMCL10605	ORTHOMCL8613	ORTHOMCL7980	ORTHOMCL4417	ORTHOMCL8866	ORTHOMCL10638	ORTHOMCL8008	ORTHOMCL8866
ORTHOMCL7000	ORTHOMCL4602	ORTHOMCL10368	ORTHOMCL7326	ORTHOMCL9384	ORTHOMCL9780	ORTHOMCL9086	ORTHOMCL4681	ORTHOMCL9001	ORTHOMCL7808	ORTHOMCL4681
ORTHOMCL4716	ORTHOMCL8599	ORTHOMCL7214	ORTHOMCL8636	ORTHOMCL7753	ORTHOMCL9399	ORTHOMCL6946	ORTHOMCL6071	ORTHOMCL6690	ORTHOMCL7780	ORTHOMCL7930
ORTHOMCL10093	ORTHOMCL6292	ORTHOMCL4643	ORTHOMCL9213	ORTHOMCL4999	ORTHOMCL7880	ORTHOMCL6446	ORTHOMCL7930	ORTHOMCL10819	ORTHOMCL6010	ORTHOMCL9719
ORTHOMCL5392	ORTHOMCL9894	ORTHOMCL5567	ORTHOMCL9975	ORTHOMCL4681	ORTHOMCL6108	ORTHOMCL7165	ORTHOMCL9719	ORTHOMCL7412	ORTHOMCL6145	ORTHOMCL10048
ORTHOMCL6968	ORTHOMCL7899	ORTHOMCL4378	ORTHOMCL4855	ORTHOMCL5927	ORTHOMCL9894	ORTHOMCL6655	ORTHOMCL9648	ORTHOMCL9673	ORTHOMCL4417	ORTHOMCL7441
ORTHOMCL5625	ORTHOMCL10037	ORTHOMCL4716	ORTHOMCL4980	ORTHOMCL6071	ORTHOMCL7899	ORTHOMCL7670	ORTHOMCL10048	ORTHOMCL4690	ORTHOMCL9086	ORTHOMCL6357
ORTHOMCL10874	ORTHOMCL4627	ORTHOMCL10093	ORTHOMCL5421	ORTHOMCL7930	ORTHOMCL10605	ORTHOMCL10638	ORTHOMCL7441	ORTHOMCL9130	ORTHOMCL6946	ORTHOMCL10368
ORTHOMCL6929	ORTHOMCL7326	ORTHOMCL5920	ORTHOMCL9875	ORTHOMCL9719	ORTHOMCL7326	ORTHOMCL5655	ORTHOMCL9658	ORTHOMCL9946	ORTHOMCL7995	ORTHOMCL7214
ORTHOMCL7283	ORTHOMCL10261	ORTHOMCL6968	ORTHOMCL5816	ORTHOMCL9648	ORTHOMCL8636	ORTHOMCL4985	ORTHOMCL10368	ORTHOMCL6699	ORTHOMCL6446	ORTHOMCL4643
ORTHOMCL5887	ORTHOMCL9975	ORTHOMCL10874	ORTHOMCL9202	ORTHOMCL10048	ORTHOMCL9213	ORTHOMCL10819	ORTHOMCL5843	ORTHOMCL4945	ORTHOMCL7292	ORTHOMCL8033
ORTHOMCL7809	ORTHOMCL4855	ORTHOMCL9998	ORTHOMCL8008	ORTHOMCL7441	ORTHOMCL7246	ORTHOMCL6651	ORTHOMCL7214	ORTHOMCL9993	ORTHOMCL7165	ORTHOMCL4857
ORTHOMCL9703	ORTHOMCL4980	ORTHOMCL6929	ORTHOMCL7808	ORTHOMCL9658	ORTHOMCL9975	ORTHOMCL9673	ORTHOMCL4643	ORTHOMCL7753	ORTHOMCL9992	ORTHOMCL7570
ORTHOMCL4462	ORTHOMCL4896	ORTHOMCL7283	ORTHOMCL10220	ORTHOMCL4422	ORTHOMCL10098	ORTHOMCL4803	ORTHOMCL8033	ORTHOMCL8866	ORTHOMCL6655	ORTHOMCL4716
ORTHOMCL8484	ORTHOMCL8628	ORTHOMCL7650	ORTHOMCL8967	ORTHOMCL10368	ORTHOMCL4855	ORTHOMCL9130	ORTHOMCL4378	ORTHOMCL4681	ORTHOMCL5141	ORTHOMCL10093
ORTHOMCL9508	ORTHOMCL9875	ORTHOMCL5865	ORTHOMCL6010	ORTHOMCL7214	ORTHOMCL4980	ORTHOMCL7583	ORTHOMCL7570	ORTHOMCL6071	ORTHOMCL10638	ORTHOMCL6968
ORTHOMCL9969	ORTHOMCL4862	ORTHOMCL9703	ORTHOMCL6145	ORTHOMCL4636	ORTHOMCL7478	ORTHOMCL9946	ORTHOMCL4716	ORTHOMCL7930	ORTHOMCL9769	ORTHOMCL10874
ORTHOMCL10551	ORTHOMCL5816	ORTHOMCL8854	ORTHOMCL9086	ORTHOMCL4643	ORTHOMCL5421	ORTHOMCL6699	ORTHOMCL10093	ORTHOMCL9719	ORTHOMCL4708	ORTHOMCL9998
ORTHOMCL9672	ORTHOMCL9202	ORTHOMCL8484	ORTHOMCL6946	ORTHOMCL8033	ORTHOMCL6600	ORTHOMCL7429	ORTHOMCL5920	ORTHOMCL9648	ORTHOMCL10790	ORTHOMCL7283
ORTHOMCL10152	ORTHOMCL8008	ORTHOMCL4990	ORTHOMCL6446	ORTHOMCL5567	ORTHOMCL8628	ORTHOMCL4945	ORTHOMCL6968	ORTHOMCL10048	ORTHOMCL8333	ORTHOMCL7650
ORTHOMCL10245	ORTHOMCL7780	ORTHOMCL6448	ORTHOMCL7165	ORTHOMCL4857	ORTHOMCL9875	ORTHOMCL9384	ORTHOMCL10874	ORTHOMCL7441	ORTHOMCL10819	ORTHOMCL5865
ORTHOMCL4883	ORTHOMCL8967	ORTHOMCL6155	ORTHOMCL6655	ORTHOMCL10093	ORTHOMCL4862	ORTHOMCL9993	ORTHOMCL9998	ORTHOMCL9658	ORTHOMCL6651	ORTHOMCL9703
ORTHOMCL5899	ORTHOMCL6145	ORTHOMCL9955	ORTHOMCL4985	ORTHOMCL6968	ORTHOMCL5816	ORTHOMCL7753	ORTHOMCL7283	ORTHOMCL10368	ORTHOMCL9673	ORTHOMCL8854
ORTHOMCL7969	ORTHOMCL6946	ORTHOMCL4883	ORTHOMCL6690	ORTHOMCL10874	ORTHOMCL9202	ORTHOMCL4681	ORTHOMCL9932	ORTHOMCL7214	ORTHOMCL7544	ORTHOMCL4990
ORTHOMCL9156	ORTHOMCL7165	ORTHOMCL8474	ORTHOMCL10790	ORTHOMCL7283	ORTHOMCL8189	ORTHOMCL6071	ORTHOMCL5865	ORTHOMCL4636	ORTHOMCL4803	ORTHOMCL6448
ORTHOMCL4591	ORTHOMCL4386	ORTHOMCL10767	ORTHOMCL10819	ORTHOMCL7809	ORTHOMCL8008	ORTHOMCL7930	ORTHOMCL9703	ORTHOMCL4643	ORTHOMCL9130	ORTHOMCL9508
ORTHOMCL8021	ORTHOMCL6098	ORTHOMCL4972	ORTHOMCL6651	ORTHOMCL5865	ORTHOMCL7808	ORTHOMCL9648	ORTHOMCL8854	ORTHOMCL8033	ORTHOMCL9946	ORTHOMCL4361
ORTHOMCL6713	ORTHOMCL10521	ORTHOMCL9156	ORTHOMCL9673	ORTHOMCL8006	ORTHOMCL7780	ORTHOMCL10048	ORTHOMCL4990	ORTHOMCL10093	ORTHOMCL6699	ORTHOMCL9672
ORTHOMCL5992	ORTHOMCL5141	ORTHOMCL4591	ORTHOMCL4690	ORTHOMCL9703	ORTHOMCL8967	ORTHOMCL7441	ORTHOMCL6448	ORTHOMCL6968	ORTHOMCL8613	ORTHOMCL9955
ORTHOMCL9747	ORTHOMCL9769	ORTHOMCL7468	ORTHOMCL9130	ORTHOMCL10022	ORTHOMCL6010	ORTHOMCL6357	ORTHOMCL10698	ORTHOMCL8043	ORTHOMCL4945	ORTHOMCL4883
ORTHOMCL10290	ORTHOMCL7367	ORTHOMCL7434	ORTHOMCL7583	ORTHOMCL8854	ORTHOMCL6145	ORTHOMCL4422	ORTHOMCL10311	ORTHOMCL10874	ORTHOMCL7622	ORTHOMCL8474
ORTHOMCL6428	ORTHOMCL4985	ORTHOMCL5132	ORTHOMCL9946	ORTHOMCL8484	ORTHOMCL4417	ORTHOMCL10368	ORTHOMCL6155	ORTHOMCL9998	ORTHOMCL7753	ORTHOMCL4972
ORTHOMCL4777	ORTHOMCL6690	ORTHOMCL6713	ORTHOMCL7429	ORTHOMCL4990	ORTHOMCL9086	ORTHOMCL7214	ORTHOMCL9672	ORTHOMCL7283	ORTHOMCL4999	ORTHOMCL5093
ORTHOMCL5495	ORTHOMCL7655	ORTHOMCL5992	ORTHOMCL4945	ORTHOMCL6448	ORTHOMCL6946	ORTHOMCL4636	ORTHOMCL4883	ORTHOMCL7650	ORTHOMCL8866	ORTHOMCL7468
ORTHOMCL10590	ORTHOMCL10819	ORTHOMCL4428	ORTHOMCL9993	ORTHOMCL5647	ORTHOMCL6446	ORTHOMCL4643	ORTHOMCL8474	ORTHOMCL5865	ORTHOMCL7930	ORTHOMCL7434
ORTHOMCL7064	ORTHOMCL9816	ORTHOMCL8749	ORTHOMCL7753	ORTHOMCL9955	ORTHOMCL7165	ORTHOMCL8033	ORTHOMCL10365	ORTHOMCL9703	ORTHOMCL10048	ORTHOMCL5132
ORTHOMCL8362	ORTHOMCL6651	ORTHOMCL10833	ORTHOMCL9503	ORTHOMCL4883	ORTHOMCL9992	ORTHOMCL5567	ORTHOMCL9156	ORTHOMCL8854	ORTHOMCL7441	ORTHOMCL6713
ORTHOMCL5044	ORTHOMCL10614	ORTHOMCL10895	ORTHOMCL4681	ORTHOMCL8474	ORTHOMCL6655	ORTHOMCL4378	ORTHOMCL5093	ORTHOMCL4990	ORTHOMCL9658	ORTHOMCL5992
ORTHOMCL8739	ORTHOMCL6180	ORTHOMCL9747	ORTHOMCL9719	ORTHOMCL5899	ORTHOMCL7670	ORTHOMCL4716	ORTHOMCL7468	ORTHOMCL6448	ORTHOMCL10368	ORTHOMCL9013
ORTHOMCL7954	ORTHOMCL9673	ORTHOMCL5623	ORTHOMCL9648	ORTHOMCL5093	ORTHOMCL10638	ORTHOMCL10093	ORTHOMCL8021	ORTHOMCL10311	ORTHOMCL7214	ORTHOMCL4428
ORTHOMCL4811	ORTHOMCL4690	ORTHOMCL10290	ORTHOMCL10048	ORTHOMCL7468	ORTHOMCL9001	ORTHOMCL5920	ORTHOMCL7434	ORTHOMCL4361	ORTHOMCL4636	ORTHOMCL8749
ORTHOMCL6930	ORTHOMCL4803	ORTHOMCL4777	ORTHOMCL7441	ORTHOMCL8842	ORTHOMCL4985	ORTHOMCL6968	ORTHOMCL6713	ORTHOMCL9955	ORTHOMCL4643	ORTHOMCL9747
ORTHOMCL7189	ORTHOMCL7630	ORTHOMCL5495	ORTHOMCL6357	ORTHOMCL7434	ORTHOMCL6690	ORTHOMCL10874	ORTHOMCL5992	ORTHOMCL4883	ORTHOMCL8033	ORTHOMCL5623
ORTHOMCL9513	ORTHOMCL9130	ORTHOMCL4611	ORTHOMCL4422	ORTHOMCL6713	ORTHOMCL10819	ORTHOMCL9998	ORTHOMCL9013	ORTHOMCL8474	ORTHOMCL4857	ORTHOMCL10290
ORTHOMCL7538	ORTHOMCL9946	ORTHOMCL10590	ORTHOMCL10368	ORTHOMCL5992	ORTHOMCL6651	ORTHOMCL6929	ORTHOMCL8749	ORTHOMCL4972	ORTHOMCL7570	ORTHOMCL6428
ORTHOMCL8583	ORTHOMCL5285	ORTHOMCL7064	ORTHOMCL7214	ORTHOMCL4428	ORTHOMCL6180	ORTHOMCL6495	ORTHOMCL10833	ORTHOMCL4591	ORTHOMCL10093	ORTHOMCL4777
ORTHOMCL7090	ORTHOMCL9993	ORTHOMCL8362	ORTHOMCL4643	ORTHOMCL8749	ORTHOMCL9673	ORTHOMCL7283	ORTHOMCL9747	ORTHOMCL7468	ORTHOMCL5392	ORTHOMCL4611
ORTHOMCL10294	ORTHOMCL7622	ORTHOMCL7035	ORTHOMCL8033	ORTHOMCL10895	ORTHOMCL4803	ORTHOMCL7650	ORTHOMCL10290	ORTHOMCL7434	ORTHOMCL6968	ORTHOMCL10590
ORTHOMCL8288	ORTHOMCL7753	ORTHOMCL5024	ORTHOMCL5567	ORTHOMCL9747	ORTHOMCL9130	ORTHOMCL5865	ORTHOMCL4777	ORTHOMCL5132	ORTHOMCL10874	ORTHOMCL7064
ORTHOMCL4966	ORTHOMCL4681	ORTHOMCL7954	ORTHOMCL4716	ORTHOMCL5623	ORTHOMCL7583	ORTHOMCL9703	ORTHOMCL5495	ORTHOMCL6713	ORTHOMCL7283	ORTHOMCL5884
ORTHOMCL7798	ORTHOMCL6071	ORTHOMCL9428	ORTHOMCL10093	ORTHOMCL10290	ORTHOMCL9946	ORTHOMCL10022	ORTHOMCL4611	ORTHOMCL5992	ORTHOMCL9932	ORTHOMCL8362
ORTHOMCL6343	ORTHOMCL5207	ORTHOMCL9513	ORTHOMCL5920	ORTHOMCL5678	ORTHOMCL6699	ORTHOMCL8854	ORTHOMCL7064	ORTHOMCL4428	ORTHOMCL5865	ORTHOMCL7035
ORTHOMCL8765	ORTHOMCL9648	ORTHOMCL7538	ORTHOMCL6968	ORTHOMCL5495	ORTHOMCL7429	ORTHOMCL8484	ORTHOMCL5884	ORTHOMCL8749	ORTHOMCL8006	ORTHOMCL5044
ORTHOMCL5955	ORTHOMCL10048	ORTHOMCL8583	ORTHOMCL10874	ORTHOMCL8362	ORTHOMCL8613	ORTHOMCL6448	ORTHOMCL8362	ORTHOMCL9747	ORTHOMCL9703	ORTHOMCL7954
ORTHOMCL9297	ORTHOMCL8258	ORTHOMCL7090	ORTHOMCL9998	ORTHOMCL5044	ORTHOMCL4945	ORTHOMCL9672	ORTHOMCL5024	ORTHOMCL5623	ORTHOMCL8854	ORTHOMCL5330
ORTHOMCL10620	ORTHOMCL7441	ORTHOMCL8288	ORTHOMCL6495	ORTHOMCL8739	ORTHOMCL9384	ORTHOMCL4655	ORTHOMCL7954	ORTHOMCL10290	ORTHOMCL4990	ORTHOMCL9428
ORTHOMCL6940	ORTHOMCL9658	ORTHOMCL4966	ORTHOMCL7283	ORTHOMCL7954	ORTHOMCL6791	ORTHOMCL9955	ORTHOMCL9513	ORTHOMCL6428	ORTHOMCL6448	ORTHOMCL9513
ORTHOMCL9208	ORTHOMCL6357	ORTHOMCL7798	ORTHOMCL7650	ORTHOMCL5330	ORTHOMCL9993	ORTHOMCL4883	ORTHOMCL8702	ORTHOMCL4777	ORTHOMCL10311	ORTHOMCL4647
ORTHOMCL4541	ORTHOMCL10368	ORTHOMCL6035	ORTHOMCL5865	ORTHOMCL9513	ORTHOMCL7753	ORTHOMCL8474	ORTHOMCL8583	ORTHOMCL5495	ORTHOMCL6155	ORTHOMCL8702
ORTHOMCL10164	ORTHOMCL10968	ORTHOMCL4490	ORTHOMCL9703	ORTHOMCL8702	ORTHOMCL8866	ORTHOMCL7048	ORTHOMCL8288	ORTHOMCL4611	ORTHOMCL4883	ORTHOMCL8583
ORTHOMCL6740	ORTHOMCL7214	ORTHOMCL9901	ORTHOMCL8854	ORTHOMCL8583	ORTHOMCL4681	ORTHOMCL4972	ORTHOMCL4966	ORTHOMCL10590	ORTHOMCL8474	ORTHOMCL7090
ORTHOMCL4719	ORTHOMCL4643	ORTHOMCL6240	ORTHOMCL8484	ORTHOMCL8353	ORTHOMCL7930	ORTHOMCL9156	ORTHOMCL7798	ORTHOMCL7064	ORTHOMCL10767	ORTHOMCL8288
ORTHOMCL7384	ORTHOMCL6378	ORTHOMCL8765	ORTHOMCL4990	ORTHOMCL8288	ORTHOMCL9719	ORTHOMCL7468	ORTHOMCL6035	ORTHOMCL5884	ORTHOMCL10365	ORTHOMCL4966
ORTHOMCL9188	ORTHOMCL4857	ORTHOMCL7400	ORTHOMCL6448	ORTHOMCL4966	ORTHOMCL9648	ORTHOMCL7434	ORTHOMCL8309	ORTHOMCL8362	ORTHOMCL4591	ORTHOMCL7798
ORTHOMCL6072	ORTHOMCL7570	ORTHOMCL6940	ORTHOMCL10698	ORTHOMCL8052	ORTHOMCL10048	ORTHOMCL5132	ORTHOMCL9901	ORTHOMCL7035	ORTHOMCL7468	ORTHOMCL6035
ORTHOMCL6095	ORTHOMCL4716	ORTHOMCL10283	ORTHOMCL9672	ORTHOMCL7798	ORTHOMCL7441	ORTHOMCL6713	ORTHOMCL5967	ORTHOMCL5044	ORTHOMCL7434	ORTHOMCL8309
ORTHOMCL10864	ORTHOMCL5920	ORTHOMCL5476	ORTHOMCL5983	ORTHOMCL6035	ORTHOMCL10368	ORTHOMCL5992	ORTHOMCL6240	ORTHOMCL5024	ORTHOMCL6713	ORTHOMCL9901
ORTHOMCL10357	ORTHOMCL5625	ORTHOMCL4541	ORTHOMCL4883	ORTHOMCL4490	ORTHOMCL7214	ORTHOMCL8749	ORTHOMCL7400	ORTHOMCL7954	ORTHOMCL5992	ORTHOMCL5967
ORTHOMCL4916	ORTHOMCL8043	ORTHOMCL4719	ORTHOMCL8474	ORTHOMCL8309	ORTHOMCL4636	ORTHOMCL9747	ORTHOMCL10620	ORTHOMCL9513	ORTHOMCL9013	ORTHOMCL6240
ORTHOMCL5178	ORTHOMCL10874	ORTHOMCL5659	ORTHOMCL5902	ORTHOMCL9901	ORTHOMCL6231	ORTHOMCL5623	ORTHOMCL6940	ORTHOMCL4647	ORTHOMCL4428	ORTHOMCL8765
ORTHOMCL5712	ORTHOMCL9998	ORTHOMCL5654	ORTHOMCL4972	ORTHOMCL8765	ORTHOMCL4643	ORTHOMCL10290	ORTHOMCL9947	ORTHOMCL8583	ORTHOMCL9747	ORTHOMCL7400
ORTHOMCL5129	ORTHOMCL6457	ORTHOMCL7384	ORTHOMCL9156	ORTHOMCL7400	ORTHOMCL8033	ORTHOMCL6428	ORTHOMCL10283	ORTHOMCL8288	ORTHOMCL5623	ORTHOMCL6940
ORTHOMCL4776	ORTHOMCL6929	ORTHOMCL6072	ORTHOMCL7468	ORTHOMCL6264	ORTHOMCL5567	ORTHOMCL4777	ORTHOMCL4541	ORTHOMCL4966	ORTHOMCL10290	ORTHOMCL10283
ORTHOMCL9129	ORTHOMCL5887	ORTHOMCL6095	ORTHOMCL7434	ORTHOMCL9297	ORTHOMCL4857	ORTHOMCL5495	ORTHOMCL4719	ORTHOMCL7798	ORTHOMCL6428	ORTHOMCL4541
ORTHOMCL8284	ORTHOMCL7650	ORTHOMCL6290	ORTHOMCL5132	ORTHOMCL10620	ORTHOMCL4378	ORTHOMCL10590	ORTHOMCL4609	ORTHOMCL6035	ORTHOMCL4777	ORTHOMCL4719
ORTHOMCL8816	ORTHOMCL4783	ORTHOMCL5615	ORTHOMCL6713	ORTHOMCL6940	ORTHOMCL4716	ORTHOMCL7064	ORTHOMCL7384	ORTHOMCL8309	ORTHOMCL5495	ORTHOMCL4609
ORTHOMCL8802	ORTHOMCL9703	ORTHOMCL5178	ORTHOMCL5992	ORTHOMCL10283	ORTHOMCL10093	ORTHOMCL8362	ORTHOMCL9188	ORTHOMCL9901	ORTHOMCL4611	ORTHOMCL5659
ORTHOMCL6776	ORTHOMCL4462	ORTHOMCL6638	ORTHOMCL4428	ORTHOMCL10432	ORTHOMCL5920	ORTHOMCL5044	ORTHOMCL6072	ORTHOMCL6240	ORTHOMCL10590	ORTHOMCL7384
ORTHOMCL5523	ORTHOMCL10022	ORTHOMCL5971	ORTHOMCL8749	ORTHOMCL4541	ORTHOMCL6968	ORTHOMCL7954	ORTHOMCL6095	ORTHOMCL8765	ORTHOMCL7064	ORTHOMCL6072
ORTHOMCL10267	ORTHOMCL8854	ORTHOMCL5683	ORTHOMCL9747	ORTHOMCL4719	ORTHOMCL5625	ORTHOMCL9513	ORTHOMCL6290	ORTHOMCL7400	ORTHOMCL8362	ORTHOMCL6290
ORTHOMCL10085	ORTHOMCL8484	ORTHOMCL9724	ORTHOMCL5623	ORTHOMCL5654	ORTHOMCL10874	ORTHOMCL4647	ORTHOMCL5615	ORTHOMCL10620	ORTHOMCL5044	ORTHOMCL5615
ORTHOMCL10271	ORTHOMCL4990	ORTHOMCL4776	ORTHOMCL10290	ORTHOMCL7384	ORTHOMCL9998	ORTHOMCL8702	ORTHOMCL9536	ORTHOMCL6940	ORTHOMCL7954	ORTHOMCL5178
ORTHOMCL7564	ORTHOMCL5157	ORTHOMCL9129	ORTHOMCL4777	ORTHOMCL9188	ORTHOMCL6929	ORTHOMCL7538	ORTHOMCL6638	ORTHOMCL10283	ORTHOMCL9513	ORTHOMCL9536
ORTHOMCL6685	ORTHOMCL9508	ORTHOMCL8284	ORTHOMCL5495	ORTHOMCL6072	ORTHOMCL6495	ORTHOMCL8583	ORTHOMCL5971	ORTHOMCL4541	ORTHOMCL8583	ORTHOMCL6638
ORTHOMCL5600	ORTHOMCL10698	ORTHOMCL5134	ORTHOMCL4611	ORTHOMCL6095	ORTHOMCL7283	ORTHOMCL7090	ORTHOMCL5683	ORTHOMCL4719	ORTHOMCL8288	ORTHOMCL5971
ORTHOMCL5395	ORTHOMCL5647	ORTHOMCL4996	ORTHOMCL10590	ORTHOMCL5178	ORTHOMCL7650	ORTHOMCL8288	ORTHOMCL4760	ORTHOMCL5659	ORTHOMCL4966	ORTHOMCL5683
ORTHOMCL5143	ORTHOMCL8437	ORTHOMCL10835	ORTHOMCL7064	ORTHOMCL6638	ORTHOMCL5865	ORTHOMCL4966	ORTHOMCL5129	ORTHOMCL7384	ORTHOMCL7798	ORTHOMCL4760
ORTHOMCL10919	ORTHOMCL10483	ORTHOMCL8816	ORTHOMCL8362	ORTHOMCL5971	ORTHOMCL8006	ORTHOMCL7798	ORTHOMCL9724	ORTHOMCL6072	ORTHOMCL4861	ORTHOMCL5712
ORTHOMCL5363	ORTHOMCL9672	ORTHOMCL8802	ORTHOMCL7035	ORTHOMCL5683	ORTHOMCL9703	ORTHOMCL6035	ORTHOMCL4776	ORTHOMCL10864	ORTHOMCL6035	ORTHOMCL8755
ORTHOMCL9477	ORTHOMCL5983	ORTHOMCL6776	ORTHOMCL7954	ORTHOMCL4760	ORTHOMCL8854	ORTHOMCL8309	ORTHOMCL9129	ORTHOMCL6290	ORTHOMCL8309	ORTHOMCL9724
ORTHOMCL10314	ORTHOMCL4883	ORTHOMCL5523	ORTHOMCL9513	ORTHOMCL5712	ORTHOMCL4990	ORTHOMCL9901	ORTHOMCL8284	ORTHOMCL5615	ORTHOMCL9901	ORTHOMCL9129
ORTHOMCL5110	ORTHOMCL5902	ORTHOMCL4830	ORTHOMCL7538	ORTHOMCL7975	ORTHOMCL6448	ORTHOMCL6240	ORTHOMCL5134	ORTHOMCL5971	ORTHOMCL6240	ORTHOMCL8284
ORTHOMCL7957	ORTHOMCL9763	ORTHOMCL6613	ORTHOMCL8583	ORTHOMCL5129	ORTHOMCL10698	ORTHOMCL8765	ORTHOMCL4996	ORTHOMCL5683	ORTHOMCL8765	ORTHOMCL5134
ORTHOMCL10134	ORTHOMCL5899	ORTHOMCL6001	ORTHOMCL5898	ORTHOMCL9724	ORTHOMCL8551	ORTHOMCL7400	ORTHOMCL10835	ORTHOMCL4760	ORTHOMCL7400	ORTHOMCL4996
ORTHOMCL8623	ORTHOMCL4623	ORTHOMCL9830	ORTHOMCL7090	ORTHOMCL4776	ORTHOMCL9672	ORTHOMCL10620	ORTHOMCL8816	ORTHOMCL9724	ORTHOMCL6940	ORTHOMCL10835
ORTHOMCL4402	ORTHOMCL4591	ORTHOMCL10879	ORTHOMCL8288	ORTHOMCL6087	ORTHOMCL4655	ORTHOMCL6940	ORTHOMCL8802	ORTHOMCL4776	ORTHOMCL10432	ORTHOMCL8802
ORTHOMCL10854	ORTHOMCL7468	ORTHOMCL7564	ORTHOMCL4966	ORTHOMCL9129	ORTHOMCL9955	ORTHOMCL10283	ORTHOMCL7142	ORTHOMCL8284	ORTHOMCL5476	ORTHOMCL6776
ORTHOMCL4971	ORTHOMCL4715	ORTHOMCL6685	ORTHOMCL7798	ORTHOMCL6715	ORTHOMCL4883	ORTHOMCL4541	ORTHOMCL5523	ORTHOMCL5134	ORTHOMCL4541	ORTHOMCL4830
ORTHOMCL5317	ORTHOMCL8842	ORTHOMCL10636	ORTHOMCL6035	ORTHOMCL4996	ORTHOMCL8474	ORTHOMCL4719	ORTHOMCL4830	ORTHOMCL4996	ORTHOMCL4719	ORTHOMCL6001
ORTHOMCL8521	ORTHOMCL7434	ORTHOMCL6931	ORTHOMCL8309	ORTHOMCL10835	ORTHOMCL7048	ORTHOMCL4609	ORTHOMCL7229	ORTHOMCL10835	ORTHOMCL7384	ORTHOMCL9830
ORTHOMCL7230	ORTHOMCL6713	ORTHOMCL5395	ORTHOMCL9901	ORTHOMCL8816	ORTHOMCL4972	ORTHOMCL7384	ORTHOMCL6613	ORTHOMCL5502	ORTHOMCL6072	ORTHOMCL10271
ORTHOMCL8058	ORTHOMCL4428	ORTHOMCL8270	ORTHOMCL6240	ORTHOMCL8802	ORTHOMCL7468	ORTHOMCL6072	ORTHOMCL9830	ORTHOMCL8816	ORTHOMCL6095	ORTHOMCL10879
ORTHOMCL5190	ORTHOMCL10895	ORTHOMCL5363	ORTHOMCL8765	ORTHOMCL5523	ORTHOMCL7434	ORTHOMCL6095	ORTHOMCL4425	ORTHOMCL8802	ORTHOMCL10864	ORTHOMCL6685
ORTHOMCL5063	ORTHOMCL9747	ORTHOMCL8494	ORTHOMCL7400	ORTHOMCL4830	ORTHOMCL5132	ORTHOMCL6290	ORTHOMCL10271	ORTHOMCL6776	ORTHOMCL6290	ORTHOMCL5395
ORTHOMCL8917	ORTHOMCL10290	ORTHOMCL6818	ORTHOMCL10620	ORTHOMCL7229	ORTHOMCL6713	ORTHOMCL5615	ORTHOMCL10879	ORTHOMCL5523	ORTHOMCL5615	ORTHOMCL5143
ORTHOMCL5506	ORTHOMCL5678	ORTHOMCL7957	ORTHOMCL6940	ORTHOMCL9659	ORTHOMCL5992	ORTHOMCL5178	ORTHOMCL6685	ORTHOMCL4830	ORTHOMCL5971	ORTHOMCL6796
ORTHOMCL9307	ORTHOMCL4777	ORTHOMCL8577	ORTHOMCL10283	ORTHOMCL9830	ORTHOMCL9013	ORTHOMCL9536	ORTHOMCL5395	ORTHOMCL6001	ORTHOMCL5683	ORTHOMCL8270
ORTHOMCL4537	ORTHOMCL6113	ORTHOMCL10854	ORTHOMCL4541	ORTHOMCL4425	ORTHOMCL8749	ORTHOMCL6638	ORTHOMCL4781	ORTHOMCL9830	ORTHOMCL4760	ORTHOMCL4781
ORTHOMCL6561	ORTHOMCL7064	ORTHOMCL7709	ORTHOMCL4719	ORTHOMCL10879	ORTHOMCL6840	ORTHOMCL5971	ORTHOMCL5363	ORTHOMCL4425	ORTHOMCL5712	ORTHOMCL5363
ORTHOMCL10517	ORTHOMCL8362	ORTHOMCL4971	ORTHOMCL5659	ORTHOMCL10636	ORTHOMCL9747	ORTHOMCL5683	ORTHOMCL9219	ORTHOMCL10271	ORTHOMCL8755	ORTHOMCL9219
ORTHOMCL6302	ORTHOMCL7035	ORTHOMCL5317	ORTHOMCL5654	ORTHOMCL6931	ORTHOMCL5623	ORTHOMCL4760	ORTHOMCL8494	ORTHOMCL10879	ORTHOMCL9724	ORTHOMCL8494
ORTHOMCL7105	ORTHOMCL5044	ORTHOMCL8521	ORTHOMCL7384	ORTHOMCL5395	ORTHOMCL10290	ORTHOMCL8755	ORTHOMCL7957	ORTHOMCL7564	ORTHOMCL6087	ORTHOMCL10210
ORTHOMCL6325	ORTHOMCL9957	ORTHOMCL4994	ORTHOMCL6072	ORTHOMCL8270	ORTHOMCL4611	ORTHOMCL9724	ORTHOMCL8577	ORTHOMCL6685	ORTHOMCL6715	ORTHOMCL7957
ORTHOMCL5131	ORTHOMCL5330	ORTHOMCL7230	ORTHOMCL6095	ORTHOMCL4781	ORTHOMCL10590	ORTHOMCL4776	ORTHOMCL10854	ORTHOMCL10225	ORTHOMCL8284	ORTHOMCL8577
ORTHOMCL8785	ORTHOMCL6930	ORTHOMCL8058	ORTHOMCL6290	ORTHOMCL5363	ORTHOMCL7064	ORTHOMCL9129	ORTHOMCL4971	ORTHOMCL6931	ORTHOMCL5134	ORTHOMCL10854
ORTHOMCL8973	ORTHOMCL9513	ORTHOMCL5063	ORTHOMCL5615	ORTHOMCL9219	ORTHOMCL8362	ORTHOMCL9826	ORTHOMCL6582	ORTHOMCL5395	ORTHOMCL4996	ORTHOMCL4494
ORTHOMCL8815	ORTHOMCL8583	ORTHOMCL8013	ORTHOMCL5178	ORTHOMCL8494	ORTHOMCL7035	ORTHOMCL8284	ORTHOMCL5317	ORTHOMCL8270	ORTHOMCL10835	ORTHOMCL4971
ORTHOMCL9525	ORTHOMCL9216	ORTHOMCL9307	ORTHOMCL6638	ORTHOMCL7957	ORTHOMCL5044	ORTHOMCL5134	ORTHOMCL8521	ORTHOMCL4781	ORTHOMCL8802	ORTHOMCL5317
ORTHOMCL9967	ORTHOMCL6097	ORTHOMCL10945	ORTHOMCL5971	ORTHOMCL10854	ORTHOMCL7954	ORTHOMCL4996	ORTHOMCL4994	ORTHOMCL5363	ORTHOMCL4830	ORTHOMCL4994
ORTHOMCL5792	ORTHOMCL7090	ORTHOMCL6112	ORTHOMCL5683	ORTHOMCL9559	ORTHOMCL9428	ORTHOMCL10835	ORTHOMCL7230	ORTHOMCL9219	ORTHOMCL9830	ORTHOMCL7230
ORTHOMCL5015	ORTHOMCL4966	ORTHOMCL9461	ORTHOMCL4760	ORTHOMCL4971	ORTHOMCL9513	ORTHOMCL8816	ORTHOMCL8058	ORTHOMCL8494	ORTHOMCL4425	ORTHOMCL8058
ORTHOMCL8185	ORTHOMCL7798	ORTHOMCL10517	ORTHOMCL9724	ORTHOMCL5317	ORTHOMCL7538	ORTHOMCL8802	ORTHOMCL7271	ORTHOMCL10210	ORTHOMCL10271	ORTHOMCL5063
ORTHOMCL6106	ORTHOMCL8016	ORTHOMCL6302	ORTHOMCL4776	ORTHOMCL8521	ORTHOMCL8583	ORTHOMCL5523	ORTHOMCL5063	ORTHOMCL10134	ORTHOMCL10879	ORTHOMCL8917
ORTHOMCL7926	ORTHOMCL8309	ORTHOMCL7105	ORTHOMCL7526	ORTHOMCL4994	ORTHOMCL7090	ORTHOMCL4830	ORTHOMCL8917	ORTHOMCL8577	ORTHOMCL6685	ORTHOMCL5506
ORTHOMCL10813	ORTHOMCL9901	ORTHOMCL5131	ORTHOMCL9129	ORTHOMCL7230	ORTHOMCL8288	ORTHOMCL7229	ORTHOMCL7071	ORTHOMCL10854	ORTHOMCL10636	ORTHOMCL8013
ORTHOMCL10258	ORTHOMCL6240	ORTHOMCL9683	ORTHOMCL8284	ORTHOMCL8058	ORTHOMCL4966	ORTHOMCL6613	ORTHOMCL5506	ORTHOMCL4494	ORTHOMCL6931	ORTHOMCL9307
ORTHOMCL4909	ORTHOMCL8765	ORTHOMCL8973	ORTHOMCL5134	ORTHOMCL8917	ORTHOMCL5432	ORTHOMCL10129	ORTHOMCL9307	ORTHOMCL4971	ORTHOMCL5395	ORTHOMCL8584
ORTHOMCL5595	ORTHOMCL6264	ORTHOMCL9525	ORTHOMCL4996	ORTHOMCL7071	ORTHOMCL7798	ORTHOMCL9830	ORTHOMCL8584	ORTHOMCL5317	ORTHOMCL6796	ORTHOMCL5114
ORTHOMCL8213	ORTHOMCL9297	ORTHOMCL4545	ORTHOMCL10835	ORTHOMCL5506	ORTHOMCL6035	ORTHOMCL10879	ORTHOMCL10945	ORTHOMCL8521	ORTHOMCL8270	ORTHOMCL10945
ORTHOMCL7841	ORTHOMCL10620	ORTHOMCL7608	ORTHOMCL8816	ORTHOMCL8013	ORTHOMCL5653	ORTHOMCL7564	ORTHOMCL5238	ORTHOMCL7230	ORTHOMCL4781	ORTHOMCL6112
ORTHOMCL10735	ORTHOMCL6940	ORTHOMCL5792	ORTHOMCL8802	ORTHOMCL9307	ORTHOMCL8309	ORTHOMCL6685	ORTHOMCL6112	ORTHOMCL8058	ORTHOMCL10919	ORTHOMCL10517
ORTHOMCL4510	ORTHOMCL10283	ORTHOMCL6936	ORTHOMCL5523	ORTHOMCL8584	ORTHOMCL7584	ORTHOMCL6931	ORTHOMCL10517	ORTHOMCL5063	ORTHOMCL5363	ORTHOMCL6302
ORTHOMCL5066	ORTHOMCL5476	ORTHOMCL8209	ORTHOMCL7229	ORTHOMCL10945	ORTHOMCL9901	ORTHOMCL5395	ORTHOMCL6302	ORTHOMCL8917	ORTHOMCL6818	ORTHOMCL7105
ORTHOMCL8420	ORTHOMCL5859	ORTHOMCL10467	ORTHOMCL9830	ORTHOMCL6112	ORTHOMCL6240	ORTHOMCL8270	ORTHOMCL7105	ORTHOMCL7071	ORTHOMCL7957	ORTHOMCL5131
ORTHOMCL5916	ORTHOMCL4719	ORTHOMCL8185	ORTHOMCL10085	ORTHOMCL10517	ORTHOMCL8765	ORTHOMCL4781	ORTHOMCL10536	ORTHOMCL8013	ORTHOMCL10134	ORTHOMCL8328
ORTHOMCL8656	ORTHOMCL6788	ORTHOMCL7926	ORTHOMCL10879	ORTHOMCL6302	ORTHOMCL7400	ORTHOMCL10919	ORTHOMCL8328	ORTHOMCL9307	ORTHOMCL10854	ORTHOMCL9683
ORTHOMCL6863	ORTHOMCL7384	ORTHOMCL8558	ORTHOMCL7564	ORTHOMCL7105	ORTHOMCL6940	ORTHOMCL5363	ORTHOMCL9683	ORTHOMCL8584	ORTHOMCL4494	ORTHOMCL8973
ORTHOMCL9838	ORTHOMCL6095	ORTHOMCL7561	ORTHOMCL6685	ORTHOMCL6325	ORTHOMCL10283	ORTHOMCL8494	ORTHOMCL8973	ORTHOMCL5114	ORTHOMCL4971	ORTHOMCL9525
ORTHOMCL6404	ORTHOMCL5178	ORTHOMCL4679	ORTHOMCL8600	ORTHOMCL9683	ORTHOMCL4541	ORTHOMCL7957	ORTHOMCL9525	ORTHOMCL10945	ORTHOMCL5317	ORTHOMCL7608
ORTHOMCL7945	ORTHOMCL4629	ORTHOMCL8598	ORTHOMCL6931	ORTHOMCL8785	ORTHOMCL4719	ORTHOMCL8577	ORTHOMCL4545	ORTHOMCL5238	ORTHOMCL8521	ORTHOMCL5792
ORTHOMCL5083	ORTHOMCL6638	ORTHOMCL6181	ORTHOMCL5395	ORTHOMCL8973	ORTHOMCL4609	ORTHOMCL10854	ORTHOMCL7608	ORTHOMCL5771	ORTHOMCL7230	ORTHOMCL10796
ORTHOMCL5072	ORTHOMCL7508	ORTHOMCL5595	ORTHOMCL5143	ORTHOMCL9525	ORTHOMCL5659	ORTHOMCL4971	ORTHOMCL5792	ORTHOMCL6112	ORTHOMCL8058	ORTHOMCL6936
ORTHOMCL4704	ORTHOMCL4760	ORTHOMCL5900	ORTHOMCL8270	ORTHOMCL9967	ORTHOMCL5654	ORTHOMCL5317	ORTHOMCL6936	ORTHOMCL10517	ORTHOMCL7271	ORTHOMCL8209
ORTHOMCL4683	ORTHOMCL5712	ORTHOMCL8213	ORTHOMCL4781	ORTHOMCL4545	ORTHOMCL7384	ORTHOMCL4994	ORTHOMCL8209	ORTHOMCL6302	ORTHOMCL5063	ORTHOMCL10467
ORTHOMCL10656	ORTHOMCL8246	ORTHOMCL8585	ORTHOMCL5363	ORTHOMCL7608	ORTHOMCL9188	ORTHOMCL7230	ORTHOMCL10467	ORTHOMCL7105	ORTHOMCL5506	ORTHOMCL7965
ORTHOMCL8089	ORTHOMCL7975	ORTHOMCL7841	ORTHOMCL5981	ORTHOMCL6936	ORTHOMCL6072	ORTHOMCL8058	ORTHOMCL7965	ORTHOMCL9683	ORTHOMCL8013	ORTHOMCL7926
ORTHOMCL8180	ORTHOMCL9724	ORTHOMCL4510	ORTHOMCL8494	ORTHOMCL10467	ORTHOMCL6095	ORTHOMCL8917	ORTHOMCL7926	ORTHOMCL8973	ORTHOMCL9307	ORTHOMCL8558
ORTHOMCL6564	ORTHOMCL4776	ORTHOMCL7101	ORTHOMCL6818	ORTHOMCL5715	ORTHOMCL6290	ORTHOMCL9307	ORTHOMCL8558	ORTHOMCL9525	ORTHOMCL8584	ORTHOMCL7561
ORTHOMCL6503	ORTHOMCL6087	ORTHOMCL5066	ORTHOMCL7957	ORTHOMCL8185	ORTHOMCL5615	ORTHOMCL8584	ORTHOMCL7561	ORTHOMCL7608	ORTHOMCL10945	ORTHOMCL10813
ORTHOMCL6893	ORTHOMCL4516	ORTHOMCL8420	ORTHOMCL4626	ORTHOMCL7965	ORTHOMCL4916	ORTHOMCL6112	ORTHOMCL10813	ORTHOMCL5792	ORTHOMCL6112	ORTHOMCL4679
ORTHOMCL6811	ORTHOMCL8284	ORTHOMCL8107	ORTHOMCL10854	ORTHOMCL7926	ORTHOMCL5178	ORTHOMCL9461	ORTHOMCL4679	ORTHOMCL6936	ORTHOMCL10517	ORTHOMCL8598
ORTHOMCL5241	ORTHOMCL10835	ORTHOMCL5916	ORTHOMCL9559	ORTHOMCL7561	ORTHOMCL6638	ORTHOMCL10517	ORTHOMCL8598	ORTHOMCL6487	ORTHOMCL6302	ORTHOMCL6181
ORTHOMCL5155	ORTHOMCL8816	ORTHOMCL6913	ORTHOMCL4971	ORTHOMCL10813	ORTHOMCL5971	ORTHOMCL6302	ORTHOMCL6181	ORTHOMCL7926	ORTHOMCL7105	ORTHOMCL4909
ORTHOMCL10643	ORTHOMCL8802	ORTHOMCL8656	ORTHOMCL5317	ORTHOMCL4679	ORTHOMCL5683	ORTHOMCL5131	ORTHOMCL4909	ORTHOMCL7561	ORTHOMCL8785	ORTHOMCL5595
ORTHOMCL4418	ORTHOMCL6776	ORTHOMCL6863	ORTHOMCL8521	ORTHOMCL8598	ORTHOMCL8755	ORTHOMCL10536	ORTHOMCL5595	ORTHOMCL4679	ORTHOMCL9525	ORTHOMCL5900
ORTHOMCL5565	ORTHOMCL10267	ORTHOMCL7774	ORTHOMCL7230	ORTHOMCL6181	ORTHOMCL5129	ORTHOMCL9683	ORTHOMCL5900	ORTHOMCL8598	ORTHOMCL9967	ORTHOMCL8213
ORTHOMCL8351	ORTHOMCL10085	ORTHOMCL9838	ORTHOMCL8058	ORTHOMCL4909	ORTHOMCL9724	ORTHOMCL8785	ORTHOMCL8213	ORTHOMCL6181	ORTHOMCL7608	ORTHOMCL8585
ORTHOMCL8054	ORTHOMCL7564	ORTHOMCL6404	ORTHOMCL5103	ORTHOMCL5595	ORTHOMCL4776	ORTHOMCL8973	ORTHOMCL8585	ORTHOMCL4909	ORTHOMCL10796	ORTHOMCL7841
ORTHOMCL6629	ORTHOMCL6685	ORTHOMCL8205	ORTHOMCL8917	ORTHOMCL5900	ORTHOMCL7526	ORTHOMCL9525	ORTHOMCL7841	ORTHOMCL5595	ORTHOMCL6936	ORTHOMCL4510
ORTHOMCL10415	ORTHOMCL6953	ORTHOMCL5072	ORTHOMCL8013	ORTHOMCL8213	ORTHOMCL9129	ORTHOMCL7608	ORTHOMCL9616	ORTHOMCL5900	ORTHOMCL8209	ORTHOMCL7101
ORTHOMCL9110	ORTHOMCL6499	ORTHOMCL4496	ORTHOMCL9307	ORTHOMCL8585	ORTHOMCL8284	ORTHOMCL5792	ORTHOMCL4510	ORTHOMCL8213	ORTHOMCL10467	ORTHOMCL5066
ORTHOMCL8870	ORTHOMCL6931	ORTHOMCL4704	ORTHOMCL10945	ORTHOMCL7841	ORTHOMCL5134	ORTHOMCL6936	ORTHOMCL7101	ORTHOMCL8585	ORTHOMCL8185	ORTHOMCL8420
ORTHOMCL8038	ORTHOMCL5395	ORTHOMCL10656	ORTHOMCL6112	ORTHOMCL10351	ORTHOMCL4996	ORTHOMCL8209	ORTHOMCL5066	ORTHOMCL7841	ORTHOMCL6487	ORTHOMCL8107
ORTHOMCL5401	ORTHOMCL7121	ORTHOMCL5308	ORTHOMCL10517	ORTHOMCL4510	ORTHOMCL10835	ORTHOMCL10467	ORTHOMCL8420	ORTHOMCL9616	ORTHOMCL7965	ORTHOMCL5916
ORTHOMCL7115	ORTHOMCL8270	ORTHOMCL8466	ORTHOMCL6302	ORTHOMCL5066	ORTHOMCL5502	ORTHOMCL8185	ORTHOMCL8107	ORTHOMCL4510	ORTHOMCL7926	ORTHOMCL6913
ORTHOMCL4707	ORTHOMCL5363	ORTHOMCL8543	ORTHOMCL7105	ORTHOMCL8420	ORTHOMCL8816	ORTHOMCL7965	ORTHOMCL5916	ORTHOMCL7101	ORTHOMCL8558	ORTHOMCL8656
ORTHOMCL5467	ORTHOMCL9219	ORTHOMCL6564	ORTHOMCL5131	ORTHOMCL8107	ORTHOMCL8802	ORTHOMCL7926	ORTHOMCL6913	ORTHOMCL5066	ORTHOMCL7561	ORTHOMCL6863
ORTHOMCL9923	ORTHOMCL5110	ORTHOMCL6893	ORTHOMCL10536	ORTHOMCL5916	ORTHOMCL4830	ORTHOMCL8558	ORTHOMCL8656	ORTHOMCL8420	ORTHOMCL4679	ORTHOMCL9838
ORTHOMCL9598	ORTHOMCL10210	ORTHOMCL6811	ORTHOMCL9683	ORTHOMCL8656	ORTHOMCL7229	ORTHOMCL7561	ORTHOMCL6863	ORTHOMCL8107	ORTHOMCL8598	ORTHOMCL6404
ORTHOMCL10001	ORTHOMCL10999	ORTHOMCL10153	ORTHOMCL8785	ORTHOMCL9389	ORTHOMCL6613	ORTHOMCL4679	ORTHOMCL7774	ORTHOMCL5916	ORTHOMCL6181	ORTHOMCL5072
ORTHOMCL5737	ORTHOMCL7957	ORTHOMCL4630	ORTHOMCL8973	ORTHOMCL6863	ORTHOMCL9830	ORTHOMCL8598	ORTHOMCL9838	ORTHOMCL6913	ORTHOMCL4909	ORTHOMCL4496
ORTHOMCL5872	ORTHOMCL8577	ORTHOMCL5241	ORTHOMCL9525	ORTHOMCL6404	ORTHOMCL10879	ORTHOMCL6181	ORTHOMCL6404	ORTHOMCL8656	ORTHOMCL5595	ORTHOMCL8916
ORTHOMCL6118	ORTHOMCL10854	ORTHOMCL4418	ORTHOMCL9967	ORTHOMCL5072	ORTHOMCL7564	ORTHOMCL4909	ORTHOMCL5083	ORTHOMCL6863	ORTHOMCL5900	ORTHOMCL5332
ORTHOMCL5584	ORTHOMCL4971	ORTHOMCL8054	ORTHOMCL4545	ORTHOMCL4496	ORTHOMCL6685	ORTHOMCL5595	ORTHOMCL5072	ORTHOMCL7774	ORTHOMCL8213	ORTHOMCL10656
ORTHOMCL4721	ORTHOMCL5317	ORTHOMCL6629	ORTHOMCL7608	ORTHOMCL5841	ORTHOMCL10225	ORTHOMCL8213	ORTHOMCL4496	ORTHOMCL9838	ORTHOMCL8585	ORTHOMCL9270
ORTHOMCL4748	ORTHOMCL8058	ORTHOMCL8092	ORTHOMCL6684	ORTHOMCL9270	ORTHOMCL9774	ORTHOMCL8585	ORTHOMCL4704	ORTHOMCL6404	ORTHOMCL7841	ORTHOMCL8466
ORTHOMCL5095	ORTHOMCL5103	ORTHOMCL10415	ORTHOMCL6936	ORTHOMCL8466	ORTHOMCL6931	ORTHOMCL7841	ORTHOMCL4683	ORTHOMCL5083	ORTHOMCL4510	ORTHOMCL8543
ORTHOMCL9701	ORTHOMCL5063	ORTHOMCL9110	ORTHOMCL8209	ORTHOMCL8543	ORTHOMCL5395	ORTHOMCL4510	ORTHOMCL10656	ORTHOMCL5072	ORTHOMCL8420	ORTHOMCL8180
ORTHOMCL9669	ORTHOMCL5506	ORTHOMCL5189	ORTHOMCL10467	ORTHOMCL6564	ORTHOMCL8270	ORTHOMCL7101	ORTHOMCL5308	ORTHOMCL4496	ORTHOMCL8107	ORTHOMCL6564
ORTHOMCL7931	ORTHOMCL8013	ORTHOMCL8297	ORTHOMCL8185	ORTHOMCL6893	ORTHOMCL4781	ORTHOMCL5066	ORTHOMCL8466	ORTHOMCL4704	ORTHOMCL5916	ORTHOMCL10278
ORTHOMCL8117	ORTHOMCL9307	ORTHOMCL4895	ORTHOMCL7965	ORTHOMCL6811	ORTHOMCL5363	ORTHOMCL8420	ORTHOMCL8543	ORTHOMCL4683	ORTHOMCL4853	ORTHOMCL6811
ORTHOMCL6706	ORTHOMCL5238	ORTHOMCL10059	ORTHOMCL7926	ORTHOMCL10153	ORTHOMCL5981	ORTHOMCL8107	ORTHOMCL8089	ORTHOMCL5332	ORTHOMCL9593	ORTHOMCL10153
ORTHOMCL8462	ORTHOMCL6561	ORTHOMCL5401	ORTHOMCL8558	ORTHOMCL4630	ORTHOMCL8494	ORTHOMCL5916	ORTHOMCL6564	ORTHOMCL10656	ORTHOMCL6913	ORTHOMCL5155
ORTHOMCL5661	ORTHOMCL9461	ORTHOMCL4707	ORTHOMCL7561	ORTHOMCL7795	ORTHOMCL6818	ORTHOMCL8656	ORTHOMCL6893	ORTHOMCL8466	ORTHOMCL8656	ORTHOMCL4418
ORTHOMCL8234	ORTHOMCL10517	ORTHOMCL6736	ORTHOMCL10813	ORTHOMCL5241	ORTHOMCL7957	ORTHOMCL6863	ORTHOMCL6811	ORTHOMCL8543	ORTHOMCL9389	ORTHOMCL8160
ORTHOMCL5068	ORTHOMCL8177	ORTHOMCL9923	ORTHOMCL4679	ORTHOMCL5155	ORTHOMCL10134	ORTHOMCL7774	ORTHOMCL10153	ORTHOMCL8089	ORTHOMCL6863	ORTHOMCL8995
ORTHOMCL9324	ORTHOMCL6302	ORTHOMCL9598	ORTHOMCL8598	ORTHOMCL10643	ORTHOMCL9014	ORTHOMCL6404	ORTHOMCL5155	ORTHOMCL6564	ORTHOMCL7774	ORTHOMCL5565
ORTHOMCL10146	ORTHOMCL7105	ORTHOMCL8419	ORTHOMCL6181	ORTHOMCL4418	ORTHOMCL10854	ORTHOMCL5072	ORTHOMCL10643	ORTHOMCL6893	ORTHOMCL9838	ORTHOMCL7264
ORTHOMCL8377	ORTHOMCL5131	ORTHOMCL10001	ORTHOMCL4909	ORTHOMCL8995	ORTHOMCL9559	ORTHOMCL4704	ORTHOMCL4418	ORTHOMCL6811	ORTHOMCL6404	ORTHOMCL8054
ORTHOMCL5996	ORTHOMCL9683	ORTHOMCL5584	ORTHOMCL5595	ORTHOMCL7264	ORTHOMCL7709	ORTHOMCL7281	ORTHOMCL7187	ORTHOMCL10153	ORTHOMCL5083	ORTHOMCL6629
ORTHOMCL7950	ORTHOMCL8785	ORTHOMCL4721	ORTHOMCL5900	ORTHOMCL8054	ORTHOMCL4494	ORTHOMCL10656	ORTHOMCL8054	ORTHOMCL4630	ORTHOMCL4496	ORTHOMCL8092
ORTHOMCL8004	ORTHOMCL8973	ORTHOMCL6171	ORTHOMCL8213	ORTHOMCL6629	ORTHOMCL4971	ORTHOMCL9270	ORTHOMCL6629	ORTHOMCL5155	ORTHOMCL4704	ORTHOMCL10415
ORTHOMCL8794	ORTHOMCL8815	ORTHOMCL5095	ORTHOMCL8585	ORTHOMCL8092	ORTHOMCL8521	ORTHOMCL5308	ORTHOMCL8092	ORTHOMCL10643	ORTHOMCL10656	ORTHOMCL9110
ORTHOMCL8491	ORTHOMCL9525	ORTHOMCL9701	ORTHOMCL7841	ORTHOMCL10415	ORTHOMCL4994	ORTHOMCL8466	ORTHOMCL10415	ORTHOMCL8054	ORTHOMCL5308	ORTHOMCL4492
ORTHOMCL5398	ORTHOMCL9967	ORTHOMCL9669	ORTHOMCL5420	ORTHOMCL9110	ORTHOMCL7230	ORTHOMCL8543	ORTHOMCL9110	ORTHOMCL6629	ORTHOMCL8466	ORTHOMCL8870
ORTHOMCL6080	ORTHOMCL7608	ORTHOMCL10027	ORTHOMCL7101	ORTHOMCL4895	ORTHOMCL8058	ORTHOMCL6564	ORTHOMCL8870	ORTHOMCL8092	ORTHOMCL8180	ORTHOMCL4895
ORTHOMCL6149	ORTHOMCL5792	ORTHOMCL10801	ORTHOMCL5066	ORTHOMCL4409	ORTHOMCL8013	ORTHOMCL6893	ORTHOMCL5189	ORTHOMCL10415	ORTHOMCL6564	ORTHOMCL10059
ORTHOMCL4382	ORTHOMCL10796	ORTHOMCL6706	ORTHOMCL8420	ORTHOMCL10386	ORTHOMCL9307	ORTHOMCL6811	ORTHOMCL10059	ORTHOMCL9110	ORTHOMCL6811	ORTHOMCL10386
ORTHOMCL10557	ORTHOMCL6936	ORTHOMCL10764	ORTHOMCL8107	ORTHOMCL8507	ORTHOMCL8584	ORTHOMCL10153	ORTHOMCL5401	ORTHOMCL4492	ORTHOMCL10153	ORTHOMCL5401
ORTHOMCL9046	ORTHOMCL8209	ORTHOMCL10706	ORTHOMCL5916	ORTHOMCL4707	ORTHOMCL10945	ORTHOMCL7795	ORTHOMCL8507	ORTHOMCL8870	ORTHOMCL4630	ORTHOMCL8507
ORTHOMCL6354	ORTHOMCL8185	ORTHOMCL8911	ORTHOMCL6913	ORTHOMCL5467	ORTHOMCL6112	ORTHOMCL5155	ORTHOMCL10459	ORTHOMCL5189	ORTHOMCL5155	ORTHOMCL10485
ORTHOMCL9650	ORTHOMCL7965	ORTHOMCL5661	ORTHOMCL8656	ORTHOMCL6736	ORTHOMCL9461	ORTHOMCL10643	ORTHOMCL4654	ORTHOMCL4895	ORTHOMCL5565	ORTHOMCL4707
ORTHOMCL9237	ORTHOMCL7926	ORTHOMCL8774	ORTHOMCL6863	ORTHOMCL9923	ORTHOMCL10517	ORTHOMCL4418	ORTHOMCL10485	ORTHOMCL10059	ORTHOMCL7264	ORTHOMCL5467
ORTHOMCL5538	ORTHOMCL8558	ORTHOMCL9913	ORTHOMCL7774	ORTHOMCL9598	ORTHOMCL6302	ORTHOMCL8054	ORTHOMCL4707	ORTHOMCL5401	ORTHOMCL8054	ORTHOMCL9923
ORTHOMCL10837	ORTHOMCL10813	ORTHOMCL7950	ORTHOMCL9838	ORTHOMCL10001	ORTHOMCL7105	ORTHOMCL8092	ORTHOMCL6736	ORTHOMCL8507	ORTHOMCL6629	ORTHOMCL10001
ORTHOMCL5116	ORTHOMCL4679	ORTHOMCL8004	ORTHOMCL6404	ORTHOMCL8661	ORTHOMCL5131	ORTHOMCL10415	ORTHOMCL9923	ORTHOMCL10459	ORTHOMCL8092	ORTHOMCL5584
ORTHOMCL5376	ORTHOMCL8598	ORTHOMCL8794	ORTHOMCL8579	ORTHOMCL6372	ORTHOMCL10536	ORTHOMCL9110	ORTHOMCL8419	ORTHOMCL10485	ORTHOMCL10415	ORTHOMCL4721
ORTHOMCL4379	ORTHOMCL4909	ORTHOMCL7208	ORTHOMCL5083	ORTHOMCL5584	ORTHOMCL8328	ORTHOMCL8870	ORTHOMCL10001	ORTHOMCL4707	ORTHOMCL9110	ORTHOMCL5095
ORTHOMCL7718	ORTHOMCL5595	ORTHOMCL5292	ORTHOMCL5072	ORTHOMCL6171	ORTHOMCL9683	ORTHOMCL5189	ORTHOMCL5584	ORTHOMCL6736	ORTHOMCL8870	ORTHOMCL9669
ORTHOMCL5844	ORTHOMCL5900	ORTHOMCL4741	ORTHOMCL4496	ORTHOMCL5095	ORTHOMCL8973	ORTHOMCL10059	ORTHOMCL4721	ORTHOMCL9923	ORTHOMCL5189	ORTHOMCL10027
ORTHOMCL8012	ORTHOMCL7841	ORTHOMCL6014	ORTHOMCL4704	ORTHOMCL9669	ORTHOMCL9525	ORTHOMCL5401	ORTHOMCL4526	ORTHOMCL9598	ORTHOMCL10059	ORTHOMCL10801
ORTHOMCL6606	ORTHOMCL4510	ORTHOMCL9771	ORTHOMCL4683	ORTHOMCL10027	ORTHOMCL7608	ORTHOMCL4707	ORTHOMCL5095	ORTHOMCL8419	ORTHOMCL10386	ORTHOMCL6706
ORTHOMCL7038	ORTHOMCL7101	ORTHOMCL5244	ORTHOMCL5841	ORTHOMCL8514	ORTHOMCL5792	ORTHOMCL8282	ORTHOMCL9669	ORTHOMCL10001	ORTHOMCL5401	ORTHOMCL10764
ORTHOMCL6254	ORTHOMCL8107	ORTHOMCL5888	ORTHOMCL10656	ORTHOMCL6706	ORTHOMCL6936	ORTHOMCL5467	ORTHOMCL10027	ORTHOMCL5584	ORTHOMCL8507	ORTHOMCL8911
ORTHOMCL10930	ORTHOMCL6863	ORTHOMCL6849	ORTHOMCL9270	ORTHOMCL10360	ORTHOMCL8209	ORTHOMCL6736	ORTHOMCL10801	ORTHOMCL4721	ORTHOMCL4654	ORTHOMCL5661
ORTHOMCL5786	ORTHOMCL9838	ORTHOMCL8489	ORTHOMCL5308	ORTHOMCL10706	ORTHOMCL10467	ORTHOMCL8503	ORTHOMCL6706	ORTHOMCL5095	ORTHOMCL5452	ORTHOMCL8271
ORTHOMCL9178	ORTHOMCL6404	ORTHOMCL5090	ORTHOMCL8466	ORTHOMCL8911	ORTHOMCL8185	ORTHOMCL9923	ORTHOMCL8911	ORTHOMCL9669	ORTHOMCL4707	ORTHOMCL8234
ORTHOMCL8292	ORTHOMCL5072	ORTHOMCL5538	ORTHOMCL8543	ORTHOMCL5661	ORTHOMCL6487	ORTHOMCL9598	ORTHOMCL5661	ORTHOMCL10027	ORTHOMCL8503	ORTHOMCL8774
ORTHOMCL4389	ORTHOMCL4496	ORTHOMCL10925	ORTHOMCL6564	ORTHOMCL8271	ORTHOMCL7926	ORTHOMCL8419	ORTHOMCL8271	ORTHOMCL10801	ORTHOMCL9923	ORTHOMCL9913
ORTHOMCL10075	ORTHOMCL4376	ORTHOMCL5376	ORTHOMCL6893	ORTHOMCL8234	ORTHOMCL8558	ORTHOMCL10001	ORTHOMCL8234	ORTHOMCL6706	ORTHOMCL8419	ORTHOMCL7950
ORTHOMCL8678	ORTHOMCL10656	ORTHOMCL5335	ORTHOMCL6811	ORTHOMCL10146	ORTHOMCL7561	ORTHOMCL5584	ORTHOMCL8774	ORTHOMCL10764	ORTHOMCL10001	ORTHOMCL8004
ORTHOMCL6174	ORTHOMCL5308	ORTHOMCL7687	ORTHOMCL10153	ORTHOMCL8774	ORTHOMCL10813	ORTHOMCL4721	ORTHOMCL9913	ORTHOMCL10706	ORTHOMCL8661	ORTHOMCL8794
ORTHOMCL9320	ORTHOMCL8466	ORTHOMCL7718	ORTHOMCL4630	ORTHOMCL8377	ORTHOMCL4679	ORTHOMCL6171	ORTHOMCL7950	ORTHOMCL8911	ORTHOMCL5584	ORTHOMCL8491
ORTHOMCL9369	ORTHOMCL6564	ORTHOMCL9657	ORTHOMCL7795	ORTHOMCL5996	ORTHOMCL8598	ORTHOMCL9701	ORTHOMCL8004	ORTHOMCL5661	ORTHOMCL6171	ORTHOMCL7208
ORTHOMCL5727	ORTHOMCL6893	ORTHOMCL9341	ORTHOMCL5241	ORTHOMCL7950	ORTHOMCL6181	ORTHOMCL9669	ORTHOMCL8794	ORTHOMCL8234	ORTHOMCL5095	ORTHOMCL5292
ORTHOMCL4886	ORTHOMCL10153	ORTHOMCL7483	ORTHOMCL5155	ORTHOMCL7208	ORTHOMCL4909	ORTHOMCL10027	ORTHOMCL8491	ORTHOMCL10146	ORTHOMCL9701	ORTHOMCL4741
ORTHOMCL7554	ORTHOMCL4630	ORTHOMCL6798	ORTHOMCL10643	ORTHOMCL4741	ORTHOMCL5595	ORTHOMCL10801	ORTHOMCL7208	ORTHOMCL8774	ORTHOMCL9669	ORTHOMCL10691
ORTHOMCL5993	ORTHOMCL5155	ORTHOMCL8012	ORTHOMCL4418	ORTHOMCL9771	ORTHOMCL5900	ORTHOMCL6706	ORTHOMCL5292	ORTHOMCL9913	ORTHOMCL10027	ORTHOMCL6014
ORTHOMCL6453	ORTHOMCL7320	ORTHOMCL6606	ORTHOMCL7187	ORTHOMCL5244	ORTHOMCL8213	ORTHOMCL8911	ORTHOMCL6060	ORTHOMCL8004	ORTHOMCL6706	ORTHOMCL9771
ORTHOMCL9801	ORTHOMCL10643	ORTHOMCL10930	ORTHOMCL8995	ORTHOMCL8112	ORTHOMCL8585	ORTHOMCL5661	ORTHOMCL6080	ORTHOMCL8794	ORTHOMCL10360	ORTHOMCL5244
ORTHOMCL4825	ORTHOMCL4418	ORTHOMCL5786	ORTHOMCL8054	ORTHOMCL5888	ORTHOMCL7841	ORTHOMCL8774	ORTHOMCL4741	ORTHOMCL8491	ORTHOMCL8911	ORTHOMCL5888
ORTHOMCL6607	ORTHOMCL7187	ORTHOMCL9775	ORTHOMCL6629	ORTHOMCL6849	ORTHOMCL5420	ORTHOMCL9913	ORTHOMCL10691	ORTHOMCL7208	ORTHOMCL5661	ORTHOMCL6849
ORTHOMCL8905	ORTHOMCL8995	ORTHOMCL4509	ORTHOMCL8092	ORTHOMCL8489	ORTHOMCL4510	ORTHOMCL7950	ORTHOMCL9771	ORTHOMCL4914	ORTHOMCL5007	ORTHOMCL8489
ORTHOMCL9291	ORTHOMCL8054	ORTHOMCL4389	ORTHOMCL10415	ORTHOMCL9046	ORTHOMCL7101	ORTHOMCL8004	ORTHOMCL5244	ORTHOMCL5292	ORTHOMCL8234	ORTHOMCL9650
ORTHOMCL5101	ORTHOMCL4502	ORTHOMCL10075	ORTHOMCL9110	ORTHOMCL5090	ORTHOMCL5066	ORTHOMCL8794	ORTHOMCL5888	ORTHOMCL4741	ORTHOMCL10146	ORTHOMCL5090
ORTHOMCL8248	ORTHOMCL5198	ORTHOMCL8678	ORTHOMCL9619	ORTHOMCL5538	ORTHOMCL8420	ORTHOMCL7208	ORTHOMCL6849	ORTHOMCL6014	ORTHOMCL8774	ORTHOMCL5538
ORTHOMCL6419	ORTHOMCL9110	ORTHOMCL6174	ORTHOMCL8870	ORTHOMCL6771	ORTHOMCL8107	ORTHOMCL5292	ORTHOMCL8489	ORTHOMCL9771	ORTHOMCL9913	ORTHOMCL10925
ORTHOMCL7934	ORTHOMCL8870	ORTHOMCL10469	ORTHOMCL5189	ORTHOMCL8329	ORTHOMCL9593	ORTHOMCL4741	ORTHOMCL9046	ORTHOMCL5244	ORTHOMCL7950	ORTHOMCL5116
ORTHOMCL9644	ORTHOMCL5189	ORTHOMCL9320	ORTHOMCL10059	ORTHOMCL10925	ORTHOMCL6913	ORTHOMCL6014	ORTHOMCL9650	ORTHOMCL5888	ORTHOMCL7208	ORTHOMCL10511
ORTHOMCL5629	ORTHOMCL4895	ORTHOMCL5727	ORTHOMCL5401	ORTHOMCL5376	ORTHOMCL8656	ORTHOMCL9771	ORTHOMCL5090	ORTHOMCL6849	ORTHOMCL5292	ORTHOMCL7274
ORTHOMCL9654	ORTHOMCL4409	ORTHOMCL7554	ORTHOMCL4707	ORTHOMCL4379	ORTHOMCL6863	ORTHOMCL5244	ORTHOMCL6771	ORTHOMCL8489	ORTHOMCL4741	ORTHOMCL5376
ORTHOMCL6733	ORTHOMCL5651	ORTHOMCL6453	ORTHOMCL8503	ORTHOMCL7687	ORTHOMCL7774	ORTHOMCL6849	ORTHOMCL5116	ORTHOMCL9046	ORTHOMCL10691	ORTHOMCL4379
ORTHOMCL4518	ORTHOMCL8507	ORTHOMCL6002	ORTHOMCL9923	ORTHOMCL7718	ORTHOMCL9838	ORTHOMCL8489	ORTHOMCL10511	ORTHOMCL5090	ORTHOMCL9771	ORTHOMCL7687
ORTHOMCL6668	ORTHOMCL4707	ORTHOMCL5101	ORTHOMCL9598	ORTHOMCL9657	ORTHOMCL6404	ORTHOMCL9046	ORTHOMCL4595	ORTHOMCL5538	ORTHOMCL5244	ORTHOMCL9657
ORTHOMCL4427	ORTHOMCL8887	ORTHOMCL7834	ORTHOMCL5584	ORTHOMCL5383	ORTHOMCL8205	ORTHOMCL9650	ORTHOMCL7274	ORTHOMCL10925	ORTHOMCL7049	ORTHOMCL5383
ORTHOMCL8955	ORTHOMCL10001	ORTHOMCL7934	ORTHOMCL4721	ORTHOMCL7483	ORTHOMCL5072	ORTHOMCL5090	ORTHOMCL5376	ORTHOMCL5116	ORTHOMCL8112	ORTHOMCL9341
ORTHOMCL5031	ORTHOMCL5737	ORTHOMCL5629	ORTHOMCL6171	ORTHOMCL6606	ORTHOMCL4683	ORTHOMCL5538	ORTHOMCL4379	ORTHOMCL4595	ORTHOMCL6849	ORTHOMCL7483
ORTHOMCL10593	ORTHOMCL5872	ORTHOMCL9654	ORTHOMCL5095	ORTHOMCL7416	ORTHOMCL5841	ORTHOMCL10925	ORTHOMCL5335	ORTHOMCL7274	ORTHOMCL8489	ORTHOMCL6798
ORTHOMCL4618	ORTHOMCL5584	ORTHOMCL6733	ORTHOMCL9701	ORTHOMCL5786	ORTHOMCL7281	ORTHOMCL5116	ORTHOMCL7718	ORTHOMCL5376	ORTHOMCL9650	ORTHOMCL8012
ORTHOMCL6943	ORTHOMCL6286	ORTHOMCL6566	ORTHOMCL9669	ORTHOMCL9775	ORTHOMCL10656	ORTHOMCL10511	ORTHOMCL9657	ORTHOMCL4379	ORTHOMCL5090	ORTHOMCL6606
ORTHOMCL8890	ORTHOMCL4721	ORTHOMCL6668	ORTHOMCL10027	ORTHOMCL6202	ORTHOMCL8466	ORTHOMCL5376	ORTHOMCL5383	ORTHOMCL5335	ORTHOMCL5538	ORTHOMCL10930
ORTHOMCL5960	ORTHOMCL6171	ORTHOMCL10894	ORTHOMCL10801	ORTHOMCL9178	ORTHOMCL8543	ORTHOMCL4379	ORTHOMCL9341	ORTHOMCL7687	ORTHOMCL6771	ORTHOMCL5786
ORTHOMCL10063	ORTHOMCL10112	ORTHOMCL8955	ORTHOMCL6706	ORTHOMCL4389	ORTHOMCL6564	ORTHOMCL5335	ORTHOMCL7483	ORTHOMCL7718	ORTHOMCL10925	ORTHOMCL5602
ORTHOMCL8433	ORTHOMCL4748	ORTHOMCL5031	ORTHOMCL10764	ORTHOMCL10075	ORTHOMCL6893	ORTHOMCL7687	ORTHOMCL8552	ORTHOMCL9657	ORTHOMCL5116	ORTHOMCL9775
ORTHOMCL5985	ORTHOMCL5095	ORTHOMCL10593	ORTHOMCL10706	ORTHOMCL8678	ORTHOMCL6811	ORTHOMCL7718	ORTHOMCL8012	ORTHOMCL5383	ORTHOMCL7274	ORTHOMCL6202
ORTHOMCL10374	ORTHOMCL9669	ORTHOMCL4618	ORTHOMCL8911	ORTHOMCL6174	ORTHOMCL10153	ORTHOMCL9657	ORTHOMCL6606	ORTHOMCL7483	ORTHOMCL5376	ORTHOMCL4389
ORTHOMCL6534	ORTHOMCL8117	ORTHOMCL5960	ORTHOMCL5661	ORTHOMCL5236	ORTHOMCL4630	ORTHOMCL5383	ORTHOMCL10930	ORTHOMCL6606	ORTHOMCL4379	ORTHOMCL10075
ORTHOMCL4397	ORTHOMCL10334	ORTHOMCL5183	ORTHOMCL5007	ORTHOMCL10469	ORTHOMCL7795	ORTHOMCL7483	ORTHOMCL5786	ORTHOMCL10930	ORTHOMCL7687	ORTHOMCL4434
ORTHOMCL9177	ORTHOMCL6706	ORTHOMCL5397	ORTHOMCL8234	ORTHOMCL9320	ORTHOMCL5155	ORTHOMCL6798	ORTHOMCL5602	ORTHOMCL5786	ORTHOMCL7718	ORTHOMCL8678
ORTHOMCL6439	ORTHOMCL10360	ORTHOMCL8433	ORTHOMCL10146	ORTHOMCL7821	ORTHOMCL10643	ORTHOMCL8012	ORTHOMCL9775	ORTHOMCL6202	ORTHOMCL9657	ORTHOMCL6174
ORTHOMCL7900	ORTHOMCL5661	ORTHOMCL10704	ORTHOMCL8774	ORTHOMCL8429	ORTHOMCL8054	ORTHOMCL6606	ORTHOMCL6202	ORTHOMCL4509	ORTHOMCL5383	ORTHOMCL10469
ORTHOMCL8098	ORTHOMCL8271	ORTHOMCL4397	ORTHOMCL9913	ORTHOMCL7955	ORTHOMCL6629	ORTHOMCL10930	ORTHOMCL4389	ORTHOMCL4389	ORTHOMCL9341	ORTHOMCL9320
ORTHOMCL10070	ORTHOMCL9324	ORTHOMCL9177	ORTHOMCL7950	ORTHOMCL6002	ORTHOMCL8092	ORTHOMCL5786	ORTHOMCL10075	ORTHOMCL10075	ORTHOMCL7483	ORTHOMCL8631
ORTHOMCL4734	ORTHOMCL5004	ORTHOMCL5350	ORTHOMCL8004	ORTHOMCL5101	ORTHOMCL10415	ORTHOMCL5602	ORTHOMCL8678	ORTHOMCL8678	ORTHOMCL6606	ORTHOMCL5727
ORTHOMCL9318	ORTHOMCL8915	ORTHOMCL7913	ORTHOMCL8794	ORTHOMCL7934	ORTHOMCL8532	ORTHOMCL9775	ORTHOMCL6174	ORTHOMCL10240	ORTHOMCL10930	ORTHOMCL8566
ORTHOMCL9030	ORTHOMCL5996	ORTHOMCL6439	ORTHOMCL7208	ORTHOMCL4457	ORTHOMCL9110	ORTHOMCL6202	ORTHOMCL10469	ORTHOMCL6174	ORTHOMCL5786	ORTHOMCL7554
ORTHOMCL10525	ORTHOMCL5325	ORTHOMCL5252	ORTHOMCL4914	ORTHOMCL8819	ORTHOMCL9619	ORTHOMCL4561	ORTHOMCL9320	ORTHOMCL10469	ORTHOMCL5602	ORTHOMCL8589
ORTHOMCL4579	ORTHOMCL10580	ORTHOMCL10856	ORTHOMCL5292	ORTHOMCL5629	ORTHOMCL8870	ORTHOMCL4389	ORTHOMCL8566	ORTHOMCL9320	ORTHOMCL9775	ORTHOMCL6453
ORTHOMCL9434	ORTHOMCL7950	ORTHOMCL10714	ORTHOMCL4741	ORTHOMCL9654	ORTHOMCL5189	ORTHOMCL10075	ORTHOMCL7554	ORTHOMCL5727	ORTHOMCL6202	ORTHOMCL7955
ORTHOMCL7673	ORTHOMCL4914	ORTHOMCL9760	ORTHOMCL9771	ORTHOMCL6733	ORTHOMCL10059	ORTHOMCL8678	ORTHOMCL8589	ORTHOMCL8566	ORTHOMCL9178	ORTHOMCL6002
ORTHOMCL5742	ORTHOMCL5398	ORTHOMCL4435	ORTHOMCL5244	ORTHOMCL6668	ORTHOMCL5401	ORTHOMCL6174	ORTHOMCL5993	ORTHOMCL7554	ORTHOMCL4509	ORTHOMCL5101
ORTHOMCL4445	ORTHOMCL9771	ORTHOMCL8098	ORTHOMCL5888	ORTHOMCL4427	ORTHOMCL4654	ORTHOMCL10469	ORTHOMCL6453	ORTHOMCL5993	ORTHOMCL4389	ORTHOMCL7834
ORTHOMCL5020	ORTHOMCL5244	ORTHOMCL10070	ORTHOMCL6849	ORTHOMCL8955	ORTHOMCL4707	ORTHOMCL9320	ORTHOMCL7955	ORTHOMCL6453	ORTHOMCL10240	ORTHOMCL7934
ORTHOMCL10453	ORTHOMCL4382	ORTHOMCL6507	ORTHOMCL8489	ORTHOMCL5031	ORTHOMCL6736	ORTHOMCL8566	ORTHOMCL6002	ORTHOMCL9801	ORTHOMCL6174	ORTHOMCL5629
ORTHOMCL5775	ORTHOMCL9046	ORTHOMCL9318	ORTHOMCL9046	ORTHOMCL6490	ORTHOMCL8503	ORTHOMCL7554	ORTHOMCL9891	ORTHOMCL6002	ORTHOMCL9320	ORTHOMCL9654
ORTHOMCL10845	ORTHOMCL6354	ORTHOMCL10525	ORTHOMCL5090	ORTHOMCL5035	ORTHOMCL9923	ORTHOMCL4791	ORTHOMCL5101	ORTHOMCL5101	ORTHOMCL4448	ORTHOMCL6733
ORTHOMCL7430	ORTHOMCL9237	ORTHOMCL4395	ORTHOMCL10925	ORTHOMCL10593	ORTHOMCL9598	ORTHOMCL8589	ORTHOMCL7834	ORTHOMCL7834	ORTHOMCL7554	ORTHOMCL6566
ORTHOMCL9690	ORTHOMCL5538	ORTHOMCL9434	ORTHOMCL5116	ORTHOMCL6323	ORTHOMCL10001	ORTHOMCL6453	ORTHOMCL7934	ORTHOMCL7934	ORTHOMCL5993	ORTHOMCL6668
ORTHOMCL8576	ORTHOMCL5376	ORTHOMCL7300	ORTHOMCL5376	ORTHOMCL5425	ORTHOMCL6372	ORTHOMCL9801	ORTHOMCL5629	ORTHOMCL8819	ORTHOMCL6453	ORTHOMCL5031
ORTHOMCL8479	ORTHOMCL4379	ORTHOMCL6183	ORTHOMCL4379	ORTHOMCL4618	ORTHOMCL5584	ORTHOMCL8429	ORTHOMCL7134	ORTHOMCL5629	ORTHOMCL9801	ORTHOMCL5035
ORTHOMCL9372	ORTHOMCL9657	ORTHOMCL4818	ORTHOMCL7687	ORTHOMCL6943	ORTHOMCL4721	ORTHOMCL6002	ORTHOMCL9654	ORTHOMCL9654	ORTHOMCL7955	ORTHOMCL10593
ORTHOMCL10673	ORTHOMCL9341	ORTHOMCL5020	ORTHOMCL7718	ORTHOMCL6510	ORTHOMCL6171	ORTHOMCL5101	ORTHOMCL6733	ORTHOMCL6733	ORTHOMCL6002	ORTHOMCL6323
ORTHOMCL9304	ORTHOMCL5445	ORTHOMCL10453	ORTHOMCL9657	ORTHOMCL5183	ORTHOMCL5095	ORTHOMCL7834	ORTHOMCL6566	ORTHOMCL4518	ORTHOMCL9891	ORTHOMCL4618
ORTHOMCL4920	ORTHOMCL7483	ORTHOMCL5775	ORTHOMCL5383	ORTHOMCL8433	ORTHOMCL9701	ORTHOMCL7934	ORTHOMCL6668	ORTHOMCL6668	ORTHOMCL5101	ORTHOMCL5960
ORTHOMCL10594	ORTHOMCL6606	ORTHOMCL7031	ORTHOMCL7483	ORTHOMCL10374	ORTHOMCL9669	ORTHOMCL4457	ORTHOMCL5031	ORTHOMCL10894	ORTHOMCL5629	ORTHOMCL5183
ORTHOMCL6492	ORTHOMCL7416	ORTHOMCL6034	ORTHOMCL8012	ORTHOMCL9298	ORTHOMCL10027	ORTHOMCL5629	ORTHOMCL5035	ORTHOMCL8955	ORTHOMCL9654	ORTHOMCL5397
ORTHOMCL8300	ORTHOMCL9775	ORTHOMCL10845	ORTHOMCL6606	ORTHOMCL6534	ORTHOMCL10801	ORTHOMCL9654	ORTHOMCL10593	ORTHOMCL5031	ORTHOMCL10541	ORTHOMCL8433
ORTHOMCL7094	ORTHOMCL6202	ORTHOMCL9690	ORTHOMCL10930	ORTHOMCL9177	ORTHOMCL6706	ORTHOMCL10541	ORTHOMCL4618	ORTHOMCL5035	ORTHOMCL6733	ORTHOMCL10704
ORTHOMCL9893	ORTHOMCL4400	ORTHOMCL9075	ORTHOMCL5786	ORTHOMCL5350	ORTHOMCL10764	ORTHOMCL7443	ORTHOMCL6943	ORTHOMCL5746	ORTHOMCL6668	ORTHOMCL6635
ORTHOMCL6753	ORTHOMCL7651	ORTHOMCL8479	ORTHOMCL6202	ORTHOMCL7913	ORTHOMCL10706	ORTHOMCL6733	ORTHOMCL5960	ORTHOMCL10593	ORTHOMCL8955	ORTHOMCL10374
ORTHOMCL8947	ORTHOMCL4561	ORTHOMCL9094	ORTHOMCL4509	ORTHOMCL6439	ORTHOMCL8911	ORTHOMCL6566	ORTHOMCL5183	ORTHOMCL5425	ORTHOMCL5031	ORTHOMCL9177
ORTHOMCL5413	ORTHOMCL9178	ORTHOMCL8176	ORTHOMCL4389	ORTHOMCL5252	ORTHOMCL5661	ORTHOMCL6668	ORTHOMCL5397	ORTHOMCL4618	ORTHOMCL6490	ORTHOMCL5350
ORTHOMCL6031	ORTHOMCL4745	ORTHOMCL6327	ORTHOMCL10075	ORTHOMCL10856	ORTHOMCL8234	ORTHOMCL10894	ORTHOMCL8433	ORTHOMCL6510	ORTHOMCL5035	ORTHOMCL7913
ORTHOMCL7173	ORTHOMCL4509	ORTHOMCL9304	ORTHOMCL8678	ORTHOMCL8496	ORTHOMCL8774	ORTHOMCL5031	ORTHOMCL10704	ORTHOMCL5960	ORTHOMCL10593	ORTHOMCL5252
ORTHOMCL8818	ORTHOMCL8292	ORTHOMCL4920	ORTHOMCL6174	ORTHOMCL4472	ORTHOMCL9913	ORTHOMCL10593	ORTHOMCL6635	ORTHOMCL5183	ORTHOMCL6323	ORTHOMCL10856
ORTHOMCL6322	ORTHOMCL4389	ORTHOMCL7976	ORTHOMCL10469	ORTHOMCL7900	ORTHOMCL8377	ORTHOMCL4653	ORTHOMCL10374	ORTHOMCL8433	ORTHOMCL5425	ORTHOMCL8496
ORTHOMCL8556	ORTHOMCL8678	ORTHOMCL10594	ORTHOMCL9320	ORTHOMCL8098	ORTHOMCL7950	ORTHOMCL5960	ORTHOMCL9951	ORTHOMCL10704	ORTHOMCL4618	ORTHOMCL4472
ORTHOMCL4543	ORTHOMCL6174	ORTHOMCL6492	ORTHOMCL5055	ORTHOMCL6507	ORTHOMCL8004	ORTHOMCL5183	ORTHOMCL4397	ORTHOMCL6635	ORTHOMCL5183	ORTHOMCL8098
ORTHOMCL8173	ORTHOMCL10469	ORTHOMCL4531	ORTHOMCL5727	ORTHOMCL9318	ORTHOMCL8794	ORTHOMCL5397	ORTHOMCL9177	ORTHOMCL10374	ORTHOMCL5397	ORTHOMCL10070
ORTHOMCL5684	ORTHOMCL7821	ORTHOMCL5009	ORTHOMCL8566	ORTHOMCL10525	ORTHOMCL8491	ORTHOMCL8433	ORTHOMCL5350	ORTHOMCL9951	ORTHOMCL8433	ORTHOMCL6507
ORTHOMCL4619	ORTHOMCL9369	ORTHOMCL9893	ORTHOMCL7554	ORTHOMCL4395	ORTHOMCL7208	ORTHOMCL10704	ORTHOMCL7913	ORTHOMCL9177	ORTHOMCL10704	ORTHOMCL9318
ORTHOMCL5418	ORTHOMCL5055	ORTHOMCL6004	ORTHOMCL8589	ORTHOMCL9434	ORTHOMCL5292	ORTHOMCL6635	ORTHOMCL6439	ORTHOMCL5350	ORTHOMCL6635	ORTHOMCL6126
ORTHOMCL5658	ORTHOMCL8566	ORTHOMCL6698	ORTHOMCL5993	ORTHOMCL7300	ORTHOMCL4741	ORTHOMCL10374	ORTHOMCL5252	ORTHOMCL7913	ORTHOMCL6441	ORTHOMCL10525
ORTHOMCL7150	ORTHOMCL6453	ORTHOMCL7173	ORTHOMCL6453	ORTHOMCL6027	ORTHOMCL9771	ORTHOMCL9951	ORTHOMCL10856	ORTHOMCL6439	ORTHOMCL10374	ORTHOMCL4395
ORTHOMCL7657	ORTHOMCL9801	ORTHOMCL8818	ORTHOMCL9801	ORTHOMCL5020	ORTHOMCL5244	ORTHOMCL4397	ORTHOMCL8496	ORTHOMCL5252	ORTHOMCL6534	ORTHOMCL9434
ORTHOMCL9651	ORTHOMCL8363	ORTHOMCL8556	ORTHOMCL8429	ORTHOMCL10453	ORTHOMCL6849	ORTHOMCL9177	ORTHOMCL9760	ORTHOMCL10856	ORTHOMCL4397	ORTHOMCL4433
ORTHOMCL8567	ORTHOMCL7955	ORTHOMCL4543	ORTHOMCL6002	ORTHOMCL5775	ORTHOMCL8489	ORTHOMCL5350	ORTHOMCL4435	ORTHOMCL8496	ORTHOMCL9177	ORTHOMCL7300
ORTHOMCL5503	ORTHOMCL6002	ORTHOMCL8173	ORTHOMCL5101	ORTHOMCL7031	ORTHOMCL9650	ORTHOMCL7913	ORTHOMCL6507	ORTHOMCL9760	ORTHOMCL5350	ORTHOMCL6183
ORTHOMCL10641	ORTHOMCL7834	ORTHOMCL6911	ORTHOMCL7834	ORTHOMCL7430	ORTHOMCL5090	ORTHOMCL10856	ORTHOMCL9318	ORTHOMCL8098	ORTHOMCL6439	ORTHOMCL6027
ORTHOMCL6173	ORTHOMCL4457	ORTHOMCL4619	ORTHOMCL7934	ORTHOMCL9690	ORTHOMCL5538	ORTHOMCL8496	ORTHOMCL6126	ORTHOMCL6507	ORTHOMCL5252	ORTHOMCL4818
ORTHOMCL7028	ORTHOMCL7904	ORTHOMCL9735	ORTHOMCL8819	ORTHOMCL9075	ORTHOMCL10925	ORTHOMCL9760	ORTHOMCL10525	ORTHOMCL9318	ORTHOMCL10856	ORTHOMCL5020
ORTHOMCL8254	ORTHOMCL5629	ORTHOMCL10958	ORTHOMCL5629	ORTHOMCL8479	ORTHOMCL5376	ORTHOMCL4472	ORTHOMCL4395	ORTHOMCL6126	ORTHOMCL8496	ORTHOMCL10453
ORTHOMCL5388	ORTHOMCL7134	ORTHOMCL5658	ORTHOMCL9654	ORTHOMCL8176	ORTHOMCL4379	ORTHOMCL8098	ORTHOMCL9434	ORTHOMCL10525	ORTHOMCL4435	ORTHOMCL5775
ORTHOMCL10878	ORTHOMCL9654	ORTHOMCL7150	ORTHOMCL6733	ORTHOMCL6327	ORTHOMCL5335	ORTHOMCL6507	ORTHOMCL4433	ORTHOMCL9434	ORTHOMCL8098	ORTHOMCL7031
ORTHOMCL5426	ORTHOMCL9566	ORTHOMCL7657	ORTHOMCL6566	ORTHOMCL6794	ORTHOMCL7687	ORTHOMCL9318	ORTHOMCL7300	ORTHOMCL4433	ORTHOMCL10070	ORTHOMCL6034
ORTHOMCL4572	ORTHOMCL6668	ORTHOMCL5503	ORTHOMCL6668	ORTHOMCL9304	ORTHOMCL7718	ORTHOMCL10525	ORTHOMCL10733	ORTHOMCL7300	ORTHOMCL9318	ORTHOMCL10845
ORTHOMCL8793	ORTHOMCL4427	ORTHOMCL5691	ORTHOMCL10894	ORTHOMCL4920	ORTHOMCL9657	ORTHOMCL4523	ORTHOMCL6183	ORTHOMCL6183	ORTHOMCL10525	ORTHOMCL7430
ORTHOMCL9704	ORTHOMCL8955	ORTHOMCL6173	ORTHOMCL8955	ORTHOMCL10594	ORTHOMCL5383	ORTHOMCL4395	ORTHOMCL6027	ORTHOMCL6027	ORTHOMCL4395	ORTHOMCL9690
ORTHOMCL10803	ORTHOMCL5031	ORTHOMCL8254	ORTHOMCL5031	ORTHOMCL6492	ORTHOMCL7483	ORTHOMCL9434	ORTHOMCL5020	ORTHOMCL5020	ORTHOMCL9434	ORTHOMCL9075
ORTHOMCL10948	ORTHOMCL10593	ORTHOMCL8969	ORTHOMCL10593	ORTHOMCL4531	ORTHOMCL6798	ORTHOMCL4433	ORTHOMCL10453	ORTHOMCL10453	ORTHOMCL4433	ORTHOMCL8479
ORTHOMCL5161	ORTHOMCL5425	ORTHOMCL5388	ORTHOMCL5425	ORTHOMCL5009	ORTHOMCL6606	ORTHOMCL7300	ORTHOMCL5775	ORTHOMCL5775	ORTHOMCL7300	ORTHOMCL9094
ORTHOMCL4398	ORTHOMCL6510	ORTHOMCL10282	ORTHOMCL4618	ORTHOMCL9893	ORTHOMCL10930	ORTHOMCL6183	ORTHOMCL7031	ORTHOMCL7031	ORTHOMCL10733	ORTHOMCL8176
ORTHOMCL5809	ORTHOMCL8890	ORTHOMCL8651	ORTHOMCL4653	ORTHOMCL7113	ORTHOMCL5786	ORTHOMCL6027	ORTHOMCL6034	ORTHOMCL6034	ORTHOMCL6183	ORTHOMCL6327
ORTHOMCL9554	ORTHOMCL5397	ORTHOMCL8242	ORTHOMCL4967	ORTHOMCL8947	ORTHOMCL5602	ORTHOMCL4818	ORTHOMCL10845	ORTHOMCL7430	ORTHOMCL6027	ORTHOMCL6794
ORTHOMCL8865	ORTHOMCL8433	ORTHOMCL5426	ORTHOMCL5960	ORTHOMCL6698	ORTHOMCL9775	ORTHOMCL5020	ORTHOMCL7430	ORTHOMCL9690	ORTHOMCL4818	ORTHOMCL9304
ORTHOMCL10256	ORTHOMCL10704	ORTHOMCL4572	ORTHOMCL5183	ORTHOMCL6031	ORTHOMCL6202	ORTHOMCL10453	ORTHOMCL9690	ORTHOMCL9075	ORTHOMCL5020	ORTHOMCL4920
ORTHOMCL8166	ORTHOMCL6635	ORTHOMCL8793	ORTHOMCL5397	ORTHOMCL7173	ORTHOMCL4561	ORTHOMCL5775	ORTHOMCL9075	ORTHOMCL8479	ORTHOMCL10453	ORTHOMCL10594
ORTHOMCL7844	ORTHOMCL7138	ORTHOMCL6611	ORTHOMCL8433	ORTHOMCL8492	ORTHOMCL4389	ORTHOMCL7031	ORTHOMCL8479	ORTHOMCL9094	ORTHOMCL5775	ORTHOMCL6492
ORTHOMCL5913	ORTHOMCL6441	ORTHOMCL7287	ORTHOMCL10704	ORTHOMCL8556	ORTHOMCL10075	ORTHOMCL6034	ORTHOMCL9094	ORTHOMCL8176	ORTHOMCL7031	ORTHOMCL4531
ORTHOMCL5494	ORTHOMCL9951	ORTHOMCL5161	ORTHOMCL6635	ORTHOMCL4543	ORTHOMCL8678	ORTHOMCL10845	ORTHOMCL8176	ORTHOMCL5853	ORTHOMCL6034	ORTHOMCL5009
ORTHOMCL10309	ORTHOMCL6534	ORTHOMCL4398	ORTHOMCL6441	ORTHOMCL8173	ORTHOMCL6174	ORTHOMCL7430	ORTHOMCL4772	ORTHOMCL6327	ORTHOMCL10845	ORTHOMCL9893
ORTHOMCL10794	ORTHOMCL4397	ORTHOMCL5809	ORTHOMCL10374	ORTHOMCL5246	ORTHOMCL9320	ORTHOMCL9690	ORTHOMCL6327	ORTHOMCL9304	ORTHOMCL7430	ORTHOMCL6004
ORTHOMCL6505	ORTHOMCL5350	ORTHOMCL6641	ORTHOMCL9951	ORTHOMCL4619	ORTHOMCL8566	ORTHOMCL9075	ORTHOMCL9304	ORTHOMCL4920	ORTHOMCL9690	ORTHOMCL6698
ORTHOMCL7424	ORTHOMCL6439	ORTHOMCL5304	ORTHOMCL9177	ORTHOMCL10958	ORTHOMCL7554	ORTHOMCL8479	ORTHOMCL4920	ORTHOMCL5100	ORTHOMCL9075	ORTHOMCL7173
ORTHOMCL10079	ORTHOMCL5252	ORTHOMCL5913	ORTHOMCL5350	ORTHOMCL7150	ORTHOMCL6453	ORTHOMCL9094	ORTHOMCL5100	ORTHOMCL10594	ORTHOMCL8479	ORTHOMCL8818
ORTHOMCL5113	ORTHOMCL8496	ORTHOMCL5494	ORTHOMCL7913	ORTHOMCL7657	ORTHOMCL9801	ORTHOMCL8176	ORTHOMCL10594	ORTHOMCL4531	ORTHOMCL9094	ORTHOMCL8556
ORTHOMCL10615	ORTHOMCL7900	ORTHOMCL10451	ORTHOMCL5252	ORTHOMCL9651	ORTHOMCL6002	ORTHOMCL5974	ORTHOMCL6492	ORTHOMCL5009	ORTHOMCL5560	ORTHOMCL8173
ORTHOMCL8694	ORTHOMCL10070	ORTHOMCL10987	ORTHOMCL10856	ORTHOMCL5503	ORTHOMCL5101	ORTHOMCL6327	ORTHOMCL4531	ORTHOMCL9893	ORTHOMCL8176	ORTHOMCL5246
ORTHOMCL6016	ORTHOMCL9318	ORTHOMCL6505	ORTHOMCL10714	ORTHOMCL10988	ORTHOMCL7834	ORTHOMCL6794	ORTHOMCL5009	ORTHOMCL8947	ORTHOMCL6327	ORTHOMCL4619
ORTHOMCL8276	ORTHOMCL10665	ORTHOMCL7424	ORTHOMCL8496	ORTHOMCL10641	ORTHOMCL7934	ORTHOMCL9304	ORTHOMCL9893	ORTHOMCL6698	ORTHOMCL6794	ORTHOMCL9735
ORTHOMCL7885	ORTHOMCL10525	ORTHOMCL10079	ORTHOMCL9760	ORTHOMCL5691	ORTHOMCL7904	ORTHOMCL4920	ORTHOMCL6004	ORTHOMCL7173	ORTHOMCL4920	ORTHOMCL10958
ORTHOMCL5017	ORTHOMCL4395	ORTHOMCL10615	ORTHOMCL4472	ORTHOMCL4596	ORTHOMCL8819	ORTHOMCL7976	ORTHOMCL7113	ORTHOMCL8818	ORTHOMCL10594	ORTHOMCL7150
ORTHOMCL7298	ORTHOMCL9434	ORTHOMCL8694	ORTHOMCL7900	ORTHOMCL4788	ORTHOMCL5629	ORTHOMCL10594	ORTHOMCL8947	ORTHOMCL8556	ORTHOMCL6492	ORTHOMCL5503
ORTHOMCL5861	ORTHOMCL4433	ORTHOMCL8276	ORTHOMCL10070	ORTHOMCL4608	ORTHOMCL9654	ORTHOMCL6492	ORTHOMCL5413	ORTHOMCL4543	ORTHOMCL4531	ORTHOMCL7304
ORTHOMCL8200	ORTHOMCL7300	ORTHOMCL5488	ORTHOMCL6507	ORTHOMCL6173	ORTHOMCL6733	ORTHOMCL4531	ORTHOMCL6698	ORTHOMCL8173	ORTHOMCL9893	ORTHOMCL5691
ORTHOMCL10723	ORTHOMCL4818	ORTHOMCL5474	ORTHOMCL10525	ORTHOMCL8254	ORTHOMCL6566	ORTHOMCL5009	ORTHOMCL7173	ORTHOMCL5246	ORTHOMCL7113	ORTHOMCL6173
ORTHOMCL6979	ORTHOMCL4445	ORTHOMCL5006	ORTHOMCL4395	ORTHOMCL6772	ORTHOMCL6668	ORTHOMCL9893	ORTHOMCL8818	ORTHOMCL4619	ORTHOMCL8947	ORTHOMCL8254
ORTHOMCL5364	ORTHOMCL5020	ORTHOMCL9327	ORTHOMCL9434	ORTHOMCL5448	ORTHOMCL10894	ORTHOMCL6004	ORTHOMCL8556	ORTHOMCL9735	ORTHOMCL6698	ORTHOMCL6772
ORTHOMCL8359	ORTHOMCL10453	ORTHOMCL8200	ORTHOMCL4433	ORTHOMCL9469	ORTHOMCL8955	ORTHOMCL6698	ORTHOMCL4543	ORTHOMCL10958	ORTHOMCL7173	ORTHOMCL5388
ORTHOMCL8762	ORTHOMCL9822	ORTHOMCL5870	ORTHOMCL6183	ORTHOMCL5388	ORTHOMCL5031	ORTHOMCL7173	ORTHOMCL8173	ORTHOMCL5658	ORTHOMCL8818	ORTHOMCL10282
ORTHOMCL9061	ORTHOMCL5775	ORTHOMCL8057	ORTHOMCL6027	ORTHOMCL10282	ORTHOMCL10593	ORTHOMCL8818	ORTHOMCL5246	ORTHOMCL6680	ORTHOMCL8556	ORTHOMCL10878
ORTHOMCL4370	ORTHOMCL6034	ORTHOMCL10723	ORTHOMCL4818	ORTHOMCL10878	ORTHOMCL5425	ORTHOMCL8556	ORTHOMCL4619	ORTHOMCL7150	ORTHOMCL8173	ORTHOMCL8651
ORTHOMCL4695	ORTHOMCL10845	ORTHOMCL10625	ORTHOMCL5020	ORTHOMCL8651	ORTHOMCL4618	ORTHOMCL4543	ORTHOMCL10958	ORTHOMCL5503	ORTHOMCL5246	ORTHOMCL8242
ORTHOMCL7927	ORTHOMCL9690	ORTHOMCL8762	ORTHOMCL10453	ORTHOMCL8242	ORTHOMCL6510	ORTHOMCL8173	ORTHOMCL5418	ORTHOMCL7304	ORTHOMCL4619	ORTHOMCL5426
ORTHOMCL6509	ORTHOMCL8479	ORTHOMCL9061	ORTHOMCL5775	ORTHOMCL5426	ORTHOMCL5960	ORTHOMCL5246	ORTHOMCL7150	ORTHOMCL5691	ORTHOMCL9735	ORTHOMCL4572
ORTHOMCL9526	ORTHOMCL9094	ORTHOMCL4480	ORTHOMCL7031	ORTHOMCL4572	ORTHOMCL5183	ORTHOMCL4619	ORTHOMCL5503	ORTHOMCL4788	ORTHOMCL5658	ORTHOMCL8793
ORTHOMCL9834	ORTHOMCL8176	ORTHOMCL8573	ORTHOMCL6034	ORTHOMCL8793	ORTHOMCL8433	ORTHOMCL9735	ORTHOMCL7304	ORTHOMCL6173	ORTHOMCL7150	ORTHOMCL6611
ORTHOMCL8044	ORTHOMCL4585	ORTHOMCL4658	ORTHOMCL10845	ORTHOMCL6611	ORTHOMCL6635	ORTHOMCL10958	ORTHOMCL5691	ORTHOMCL8254	ORTHOMCL5503	ORTHOMCL7287
ORTHOMCL10409	ORTHOMCL4551	ORTHOMCL4767	ORTHOMCL7430	ORTHOMCL10803	ORTHOMCL10374	ORTHOMCL5418	ORTHOMCL8254	ORTHOMCL6772	ORTHOMCL10641	ORTHOMCL5161
ORTHOMCL6204	ORTHOMCL6197	ORTHOMCL8733	ORTHOMCL9690	ORTHOMCL5161	ORTHOMCL9951	ORTHOMCL5658	ORTHOMCL6772	ORTHOMCL5232	ORTHOMCL5691	ORTHOMCL4398
ORTHOMCL7294	ORTHOMCL5100	ORTHOMCL7560	ORTHOMCL9075	ORTHOMCL4398	ORTHOMCL9177	ORTHOMCL7150	ORTHOMCL5388	ORTHOMCL5388	ORTHOMCL4788	ORTHOMCL5809
ORTHOMCL5341	ORTHOMCL10594	ORTHOMCL8044	ORTHOMCL8479	ORTHOMCL5809	ORTHOMCL5350	ORTHOMCL7657	ORTHOMCL10282	ORTHOMCL10282	ORTHOMCL6173	ORTHOMCL6641
ORTHOMCL7768	ORTHOMCL9645	ORTHOMCL10157	ORTHOMCL9094	ORTHOMCL5304	ORTHOMCL5153	ORTHOMCL5503	ORTHOMCL8651	ORTHOMCL8651	ORTHOMCL9469	ORTHOMCL7781
ORTHOMCL7663	ORTHOMCL8300	ORTHOMCL10409	ORTHOMCL8176	ORTHOMCL5913	ORTHOMCL6439	ORTHOMCL7304	ORTHOMCL8242	ORTHOMCL8242	ORTHOMCL8829	ORTHOMCL4374
ORTHOMCL9070	ORTHOMCL7094	ORTHOMCL5604	ORTHOMCL6327	ORTHOMCL5494	ORTHOMCL5252	ORTHOMCL5691	ORTHOMCL5426	ORTHOMCL5426	ORTHOMCL10282	ORTHOMCL9026
ORTHOMCL4411	ORTHOMCL9523	ORTHOMCL6204	ORTHOMCL6794	ORTHOMCL7466	ORTHOMCL10856	ORTHOMCL6173	ORTHOMCL8793	ORTHOMCL8793	ORTHOMCL8242	ORTHOMCL10998
ORTHOMCL8318	ORTHOMCL5009	ORTHOMCL7294	ORTHOMCL9304	ORTHOMCL10451	ORTHOMCL8496	ORTHOMCL8254	ORTHOMCL9704	ORTHOMCL6611	ORTHOMCL8793	ORTHOMCL5304
ORTHOMCL8129	ORTHOMCL9893	ORTHOMCL5341	ORTHOMCL4920	ORTHOMCL10987	ORTHOMCL9760	ORTHOMCL6772	ORTHOMCL6611	ORTHOMCL5161	ORTHOMCL6611	ORTHOMCL8865
ORTHOMCL4392	ORTHOMCL6753	ORTHOMCL10537	ORTHOMCL7976	ORTHOMCL6505	ORTHOMCL4435	ORTHOMCL5388	ORTHOMCL5161	ORTHOMCL10611	ORTHOMCL7287	ORTHOMCL5913
ORTHOMCL7153	ORTHOMCL10131	ORTHOMCL7663	ORTHOMCL10594	ORTHOMCL7424	ORTHOMCL7900	ORTHOMCL10282	ORTHOMCL4398	ORTHOMCL4398	ORTHOMCL5161	ORTHOMCL5494
ORTHOMCL5903	ORTHOMCL6031	ORTHOMCL9070	ORTHOMCL6492	ORTHOMCL10079	ORTHOMCL5315	ORTHOMCL8651	ORTHOMCL7781	ORTHOMCL5809	ORTHOMCL5809	ORTHOMCL10451
ORTHOMCL10633	ORTHOMCL7173	ORTHOMCL7915	ORTHOMCL4531	ORTHOMCL5798	ORTHOMCL8098	ORTHOMCL8242	ORTHOMCL4374	ORTHOMCL6641	ORTHOMCL7781	ORTHOMCL10987
ORTHOMCL8179	ORTHOMCL8818	ORTHOMCL8163	ORTHOMCL5009	ORTHOMCL10615	ORTHOMCL10070	ORTHOMCL5426	ORTHOMCL9026	ORTHOMCL7781	ORTHOMCL4374	ORTHOMCL6505
ORTHOMCL8968	ORTHOMCL6813	ORTHOMCL10727	ORTHOMCL9893	ORTHOMCL6038	ORTHOMCL6507	ORTHOMCL8793	ORTHOMCL10998	ORTHOMCL4374	ORTHOMCL9026	ORTHOMCL7424
ORTHOMCL5309	ORTHOMCL6322	ORTHOMCL4810	ORTHOMCL5413	ORTHOMCL8694	ORTHOMCL9318	ORTHOMCL9704	ORTHOMCL5304	ORTHOMCL9026	ORTHOMCL5304	ORTHOMCL5798
ORTHOMCL8005	ORTHOMCL8492	ORTHOMCL9162	ORTHOMCL6698	ORTHOMCL8276	ORTHOMCL6126	ORTHOMCL6611	ORTHOMCL5494	ORTHOMCL10998	ORTHOMCL8865	ORTHOMCL10615
ORTHOMCL6454	ORTHOMCL8556	ORTHOMCL10446	ORTHOMCL7173	ORTHOMCL5474	ORTHOMCL10525	ORTHOMCL7287	ORTHOMCL7466	ORTHOMCL5304	ORTHOMCL5913	ORTHOMCL8276
ORTHOMCL9247	ORTHOMCL4543	ORTHOMCL4392	ORTHOMCL8818	ORTHOMCL5017	ORTHOMCL9434	ORTHOMCL5161	ORTHOMCL10451	ORTHOMCL8865	ORTHOMCL5494	ORTHOMCL5488
ORTHOMCL5135	ORTHOMCL8173	ORTHOMCL10633	ORTHOMCL9159	ORTHOMCL9327	ORTHOMCL4433	ORTHOMCL4398	ORTHOMCL10987	ORTHOMCL4804	ORTHOMCL7466	ORTHOMCL5006
ORTHOMCL10393	ORTHOMCL7794	ORTHOMCL7047	ORTHOMCL8556	ORTHOMCL5339	ORTHOMCL7300	ORTHOMCL5809	ORTHOMCL7424	ORTHOMCL5913	ORTHOMCL10451	ORTHOMCL5017
ORTHOMCL8743	ORTHOMCL5246	ORTHOMCL8179	ORTHOMCL4543	ORTHOMCL5870	ORTHOMCL6183	ORTHOMCL9554	ORTHOMCL5798	ORTHOMCL5494	ORTHOMCL10987	ORTHOMCL9327
ORTHOMCL10898	ORTHOMCL4619	ORTHOMCL8968	ORTHOMCL8173	ORTHOMCL8057	ORTHOMCL6027	ORTHOMCL7781	ORTHOMCL10615	ORTHOMCL10451	ORTHOMCL6505	ORTHOMCL8200
ORTHOMCL9071	ORTHOMCL9735	ORTHOMCL7507	ORTHOMCL5246	ORTHOMCL10723	ORTHOMCL4818	ORTHOMCL4374	ORTHOMCL8694	ORTHOMCL10987	ORTHOMCL7424	ORTHOMCL8057
ORTHOMCL6958	ORTHOMCL10958	ORTHOMCL10582	ORTHOMCL4619	ORTHOMCL8359	ORTHOMCL5020	ORTHOMCL10998	ORTHOMCL5059	ORTHOMCL6505	ORTHOMCL10079	ORTHOMCL10723
ORTHOMCL4866	ORTHOMCL5418	ORTHOMCL8005	ORTHOMCL9735	ORTHOMCL8762	ORTHOMCL10453	ORTHOMCL5304	ORTHOMCL5488	ORTHOMCL7424	ORTHOMCL5798	ORTHOMCL10625
ORTHOMCL7347	ORTHOMCL5658	ORTHOMCL10393	ORTHOMCL10958	ORTHOMCL9061	ORTHOMCL5775	ORTHOMCL5913	ORTHOMCL5474	ORTHOMCL10079	ORTHOMCL10615	ORTHOMCL8762
ORTHOMCL5904	ORTHOMCL6703	ORTHOMCL8743	ORTHOMCL5658	ORTHOMCL4370	ORTHOMCL7031	ORTHOMCL5494	ORTHOMCL5006	ORTHOMCL5798	ORTHOMCL8694	ORTHOMCL9061
ORTHOMCL6201	ORTHOMCL7657	ORTHOMCL10898	ORTHOMCL7150	ORTHOMCL8573	ORTHOMCL6034	ORTHOMCL10451	ORTHOMCL5870	ORTHOMCL10615	ORTHOMCL5474	ORTHOMCL4480
ORTHOMCL10182	ORTHOMCL6516	ORTHOMCL6555	ORTHOMCL7657	ORTHOMCL4658	ORTHOMCL10845	ORTHOMCL10987	ORTHOMCL8057	ORTHOMCL5539	ORTHOMCL5006	ORTHOMCL4563
ORTHOMCL4997	ORTHOMCL10270	ORTHOMCL6469	ORTHOMCL6516	ORTHOMCL9383	ORTHOMCL7430	ORTHOMCL7424	ORTHOMCL10723	ORTHOMCL5488	ORTHOMCL9327	ORTHOMCL8573
ORTHOMCL5784	ORTHOMCL9651	ORTHOMCL4866	ORTHOMCL5503	ORTHOMCL7560	ORTHOMCL9690	ORTHOMCL10079	ORTHOMCL10625	ORTHOMCL5474	ORTHOMCL5870	ORTHOMCL4658
ORTHOMCL9853	ORTHOMCL5503	ORTHOMCL5181	ORTHOMCL5691	ORTHOMCL9834	ORTHOMCL9075	ORTHOMCL5113	ORTHOMCL9061	ORTHOMCL9327	ORTHOMCL8057	ORTHOMCL4767
ORTHOMCL5423	ORTHOMCL10641	ORTHOMCL7347	ORTHOMCL4788	ORTHOMCL8044	ORTHOMCL8479	ORTHOMCL10615	ORTHOMCL4480	ORTHOMCL8200	ORTHOMCL10625	ORTHOMCL7927
ORTHOMCL5688	ORTHOMCL5691	ORTHOMCL8358	ORTHOMCL6173	ORTHOMCL10409	ORTHOMCL9094	ORTHOMCL8694	ORTHOMCL4563	ORTHOMCL8057	ORTHOMCL8762	ORTHOMCL7767
ORTHOMCL8738	ORTHOMCL5735	ORTHOMCL5650	ORTHOMCL6656	ORTHOMCL6204	ORTHOMCL8176	ORTHOMCL8276	ORTHOMCL8573	ORTHOMCL10723	ORTHOMCL9061	ORTHOMCL9834
ORTHOMCL6412	ORTHOMCL4788	ORTHOMCL6339	ORTHOMCL4991	ORTHOMCL8440	ORTHOMCL4772	ORTHOMCL5488	ORTHOMCL4658	ORTHOMCL10625	ORTHOMCL4480	ORTHOMCL8044
ORTHOMCL6526	ORTHOMCL6173	ORTHOMCL8515	ORTHOMCL8254	ORTHOMCL8163	ORTHOMCL6327	ORTHOMCL5474	ORTHOMCL7767	ORTHOMCL8359	ORTHOMCL8573	ORTHOMCL10157
ORTHOMCL6548	ORTHOMCL8254	ORTHOMCL6076	ORTHOMCL6772	ORTHOMCL10844	ORTHOMCL6794	ORTHOMCL5006	ORTHOMCL8733	ORTHOMCL8762	ORTHOMCL7927	ORTHOMCL10409
ORTHOMCL8868	ORTHOMCL6772	ORTHOMCL10182	ORTHOMCL8969	ORTHOMCL8318	ORTHOMCL9304	ORTHOMCL8200	ORTHOMCL7923	ORTHOMCL9061	ORTHOMCL7767	ORTHOMCL6204
ORTHOMCL6432	ORTHOMCL8969	ORTHOMCL4997	ORTHOMCL5388	ORTHOMCL10727	ORTHOMCL4920	ORTHOMCL5870	ORTHOMCL9834	ORTHOMCL4480	ORTHOMCL8733	ORTHOMCL7294
ORTHOMCL8130	ORTHOMCL5388	ORTHOMCL9853	ORTHOMCL10282	ORTHOMCL4810	ORTHOMCL7976	ORTHOMCL8057	ORTHOMCL8044	ORTHOMCL8573	ORTHOMCL9834	ORTHOMCL5341
ORTHOMCL9870	ORTHOMCL10282	ORTHOMCL5688	ORTHOMCL10878	ORTHOMCL4392	ORTHOMCL10594	ORTHOMCL10723	ORTHOMCL10409	ORTHOMCL4658	ORTHOMCL8044	ORTHOMCL10537
ORTHOMCL5156	ORTHOMCL5396	ORTHOMCL8738	ORTHOMCL8651	ORTHOMCL10633	ORTHOMCL6492	ORTHOMCL10625	ORTHOMCL5604	ORTHOMCL4767	ORTHOMCL10409	ORTHOMCL9424
ORTHOMCL4503	ORTHOMCL8651	ORTHOMCL6412	ORTHOMCL8242	ORTHOMCL9455	ORTHOMCL4531	ORTHOMCL8762	ORTHOMCL6204	ORTHOMCL7927	ORTHOMCL6204	ORTHOMCL5319
ORTHOMCL5619	ORTHOMCL8242	ORTHOMCL4590	ORTHOMCL5426	ORTHOMCL4815	ORTHOMCL5009	ORTHOMCL9061	ORTHOMCL7294	ORTHOMCL7767	ORTHOMCL5341	ORTHOMCL7915
ORTHOMCL4858	ORTHOMCL5426	ORTHOMCL6901	ORTHOMCL8793	ORTHOMCL8179	ORTHOMCL9893	ORTHOMCL4480	ORTHOMCL5341	ORTHOMCL9834	ORTHOMCL7768	ORTHOMCL8440
ORTHOMCL4475	ORTHOMCL8793	ORTHOMCL6705	ORTHOMCL6611	ORTHOMCL4728	ORTHOMCL6004	ORTHOMCL8573	ORTHOMCL10537	ORTHOMCL8044	ORTHOMCL5319	ORTHOMCL8163
ORTHOMCL4869	ORTHOMCL9704	ORTHOMCL5156	ORTHOMCL7287	ORTHOMCL5309	ORTHOMCL6698	ORTHOMCL7927	ORTHOMCL7663	ORTHOMCL10157	ORTHOMCL9070	ORTHOMCL10727
ORTHOMCL9104	ORTHOMCL6611	ORTHOMCL10672	ORTHOMCL5161	ORTHOMCL7507	ORTHOMCL7173	ORTHOMCL7767	ORTHOMCL7915	ORTHOMCL10409	ORTHOMCL7915	ORTHOMCL4810
ORTHOMCL5224	ORTHOMCL5161	ORTHOMCL5619	ORTHOMCL10611	ORTHOMCL8005	ORTHOMCL8818	ORTHOMCL8733	ORTHOMCL10727	ORTHOMCL6204	ORTHOMCL8318	ORTHOMCL9162
ORTHOMCL10795	ORTHOMCL10611	ORTHOMCL9641	ORTHOMCL4398	ORTHOMCL6454	ORTHOMCL8556	ORTHOMCL8044	ORTHOMCL4810	ORTHOMCL7294	ORTHOMCL10727	ORTHOMCL8129
ORTHOMCL5716	ORTHOMCL5809	ORTHOMCL4858	ORTHOMCL5809	ORTHOMCL10393	ORTHOMCL4543	ORTHOMCL10157	ORTHOMCL9162	ORTHOMCL5341	ORTHOMCL4810	ORTHOMCL10446
ORTHOMCL4662	ORTHOMCL5259	ORTHOMCL4869	ORTHOMCL5259	ORTHOMCL10898	ORTHOMCL8173	ORTHOMCL10409	ORTHOMCL8129	ORTHOMCL10537	ORTHOMCL9162	ORTHOMCL4392
ORTHOMCL5076	ORTHOMCL6641	ORTHOMCL9104	ORTHOMCL6641	ORTHOMCL6555	ORTHOMCL5246	ORTHOMCL6204	ORTHOMCL4392	ORTHOMCL7663	ORTHOMCL10446	ORTHOMCL9954
ORTHOMCL8731	ORTHOMCL7489	ORTHOMCL5224	ORTHOMCL7781	ORTHOMCL5026	ORTHOMCL4619	ORTHOMCL7294	ORTHOMCL10633	ORTHOMCL9070	ORTHOMCL4392	ORTHOMCL10633
ORTHOMCL5694	ORTHOMCL5304	ORTHOMCL10795	ORTHOMCL4374	ORTHOMCL9837	ORTHOMCL10958	ORTHOMCL5341	ORTHOMCL4815	ORTHOMCL7915	ORTHOMCL10633	ORTHOMCL9765
ORTHOMCL5191	ORTHOMCL8865	ORTHOMCL4872	ORTHOMCL9026	ORTHOMCL5181	ORTHOMCL5418	ORTHOMCL10537	ORTHOMCL4728	ORTHOMCL8163	ORTHOMCL5345	ORTHOMCL8179
ORTHOMCL10405	ORTHOMCL10256	ORTHOMCL4662	ORTHOMCL10998	ORTHOMCL7347	ORTHOMCL5658	ORTHOMCL7663	ORTHOMCL8968	ORTHOMCL4810	ORTHOMCL9455	ORTHOMCL4728
ORTHOMCL10896	ORTHOMCL5159	ORTHOMCL6344	ORTHOMCL5304	ORTHOMCL5904	ORTHOMCL7150	ORTHOMCL5319	ORTHOMCL7507	ORTHOMCL9162	ORTHOMCL4815	ORTHOMCL8968
ORTHOMCL4757	ORTHOMCL8166	ORTHOMCL5489	ORTHOMCL5913	ORTHOMCL8358	ORTHOMCL7657	ORTHOMCL9070	ORTHOMCL10582	ORTHOMCL8129	ORTHOMCL8179	ORTHOMCL5309
ORTHOMCL8104	ORTHOMCL5913	ORTHOMCL7396	ORTHOMCL5494	ORTHOMCL6185	ORTHOMCL6516	ORTHOMCL7915	ORTHOMCL8005	ORTHOMCL8028	ORTHOMCL4728	ORTHOMCL7507
ORTHOMCL8260	ORTHOMCL5494	ORTHOMCL9698	ORTHOMCL10451	ORTHOMCL6076	ORTHOMCL5503	ORTHOMCL7513	ORTHOMCL6454	ORTHOMCL4392	ORTHOMCL8968	ORTHOMCL8005
ORTHOMCL10539	ORTHOMCL8232	ORTHOMCL5062	ORTHOMCL10987	ORTHOMCL10182	ORTHOMCL10988	ORTHOMCL8163	ORTHOMCL6269	ORTHOMCL10633	ORTHOMCL5309	ORTHOMCL6454
ORTHOMCL8901	ORTHOMCL7805	ORTHOMCL5694	ORTHOMCL6505	ORTHOMCL4997	ORTHOMCL5691	ORTHOMCL8318	ORTHOMCL10898	ORTHOMCL4815	ORTHOMCL7507	ORTHOMCL5135
ORTHOMCL9647	ORTHOMCL6505	ORTHOMCL7696	ORTHOMCL7424	ORTHOMCL9853	ORTHOMCL4596	ORTHOMCL4810	ORTHOMCL6555	ORTHOMCL4728	ORTHOMCL10582	ORTHOMCL10393
ORTHOMCL9519	ORTHOMCL5113	ORTHOMCL5191	ORTHOMCL10079	ORTHOMCL9082	ORTHOMCL6173	ORTHOMCL9162	ORTHOMCL6469	ORTHOMCL8968	ORTHOMCL8005	ORTHOMCL8743
ORTHOMCL10991	ORTHOMCL6038	ORTHOMCL5374	ORTHOMCL10615	ORTHOMCL8738	ORTHOMCL8254	ORTHOMCL10446	ORTHOMCL4866	ORTHOMCL5309	ORTHOMCL6454	ORTHOMCL10898
ORTHOMCL5643	ORTHOMCL8694	ORTHOMCL7503	ORTHOMCL8694	ORTHOMCL6412	ORTHOMCL6772	ORTHOMCL4392	ORTHOMCL5026	ORTHOMCL7507	ORTHOMCL8957	ORTHOMCL6555
ORTHOMCL5672	ORTHOMCL6016	ORTHOMCL10896	ORTHOMCL8276	ORTHOMCL4590	ORTHOMCL8969	ORTHOMCL7047	ORTHOMCL5181	ORTHOMCL10582	ORTHOMCL10898	ORTHOMCL6469
ORTHOMCL8611	ORTHOMCL5059	ORTHOMCL10839	ORTHOMCL5488	ORTHOMCL10989	ORTHOMCL5448	ORTHOMCL4728	ORTHOMCL10720	ORTHOMCL8005	ORTHOMCL6555	ORTHOMCL4866
ORTHOMCL4368	ORTHOMCL8997	ORTHOMCL6847	ORTHOMCL5474	ORTHOMCL6901	ORTHOMCL5388	ORTHOMCL8968	ORTHOMCL7347	ORTHOMCL6454	ORTHOMCL4866	ORTHOMCL5026
ORTHOMCL5262	ORTHOMCL5017	ORTHOMCL7827	ORTHOMCL9327	ORTHOMCL10066	ORTHOMCL10282	ORTHOMCL7507	ORTHOMCL8358	ORTHOMCL6269	ORTHOMCL5026	ORTHOMCL7347
ORTHOMCL5194	ORTHOMCL9327	ORTHOMCL8998	ORTHOMCL8200	ORTHOMCL8868	ORTHOMCL10878	ORTHOMCL10582	ORTHOMCL6339	ORTHOMCL5135	ORTHOMCL5371	ORTHOMCL8358
ORTHOMCL6130	ORTHOMCL9772	ORTHOMCL10539	ORTHOMCL5870	ORTHOMCL6432	ORTHOMCL8651	ORTHOMCL8005	ORTHOMCL4605	ORTHOMCL8743	ORTHOMCL7347	ORTHOMCL6339
ORTHOMCL8476	ORTHOMCL8200	ORTHOMCL8901	ORTHOMCL8057	ORTHOMCL5156	ORTHOMCL8242	ORTHOMCL6269	ORTHOMCL8515	ORTHOMCL10898	ORTHOMCL8358	ORTHOMCL4605
ORTHOMCL4891	ORTHOMCL5870	ORTHOMCL4754	ORTHOMCL10625	ORTHOMCL5619	ORTHOMCL5426	ORTHOMCL10393	ORTHOMCL9144	ORTHOMCL6555	ORTHOMCL6339	ORTHOMCL10821
ORTHOMCL6885	ORTHOMCL8057	ORTHOMCL7601	ORTHOMCL8359	ORTHOMCL9191	ORTHOMCL8793	ORTHOMCL8957	ORTHOMCL10182	ORTHOMCL4866	ORTHOMCL8515	ORTHOMCL8150
ORTHOMCL6480	ORTHOMCL10723	ORTHOMCL5027	ORTHOMCL9061	ORTHOMCL5029	ORTHOMCL9704	ORTHOMCL10770	ORTHOMCL4997	ORTHOMCL5026	ORTHOMCL8150	ORTHOMCL6076
ORTHOMCL10399	ORTHOMCL6979	ORTHOMCL5643	ORTHOMCL4480	ORTHOMCL4858	ORTHOMCL6611	ORTHOMCL10898	ORTHOMCL9853	ORTHOMCL7347	ORTHOMCL9144	ORTHOMCL9144
ORTHOMCL10337	ORTHOMCL8359	ORTHOMCL5672	ORTHOMCL4563	ORTHOMCL4869	ORTHOMCL7287	ORTHOMCL6555	ORTHOMCL5688	ORTHOMCL8358	ORTHOMCL10182	ORTHOMCL10182
ORTHOMCL7373	ORTHOMCL8762	ORTHOMCL10850	ORTHOMCL8573	ORTHOMCL5224	ORTHOMCL5161	ORTHOMCL6469	ORTHOMCL8738	ORTHOMCL6339	ORTHOMCL4997	ORTHOMCL4997
ORTHOMCL6632	ORTHOMCL9061	ORTHOMCL8611	ORTHOMCL4658	ORTHOMCL10795	ORTHOMCL10611	ORTHOMCL4866	ORTHOMCL6412	ORTHOMCL4605	ORTHOMCL9853	ORTHOMCL9853
ORTHOMCL9054	ORTHOMCL4563	ORTHOMCL7731	ORTHOMCL4767	ORTHOMCL4872	ORTHOMCL4398	ORTHOMCL5181	ORTHOMCL8554	ORTHOMCL8515	ORTHOMCL5688	ORTHOMCL6412
ORTHOMCL10095	ORTHOMCL4370	ORTHOMCL10293	ORTHOMCL7927	ORTHOMCL4662	ORTHOMCL5809	ORTHOMCL7347	ORTHOMCL4590	ORTHOMCL10821	ORTHOMCL8738	ORTHOMCL4638
ORTHOMCL9294	ORTHOMCL8573	ORTHOMCL4368	ORTHOMCL7767	ORTHOMCL7053	ORTHOMCL5259	ORTHOMCL8358	ORTHOMCL6901	ORTHOMCL9144	ORTHOMCL6412	ORTHOMCL4956
ORTHOMCL5107	ORTHOMCL4767	ORTHOMCL5262	ORTHOMCL7560	ORTHOMCL8731	ORTHOMCL7781	ORTHOMCL6339	ORTHOMCL8868	ORTHOMCL10182	ORTHOMCL4956	ORTHOMCL4590
ORTHOMCL7415	ORTHOMCL9383	ORTHOMCL9783	ORTHOMCL8044	ORTHOMCL6344	ORTHOMCL10998	ORTHOMCL4605	ORTHOMCL6705	ORTHOMCL4997	ORTHOMCL4590	ORTHOMCL6901
ORTHOMCL9552	ORTHOMCL7767	ORTHOMCL6789	ORTHOMCL10157	ORTHOMCL5694	ORTHOMCL5304	ORTHOMCL8515	ORTHOMCL5893	ORTHOMCL9853	ORTHOMCL6901	ORTHOMCL8868
ORTHOMCL9439	ORTHOMCL8897	ORTHOMCL9692	ORTHOMCL10409	ORTHOMCL5191	ORTHOMCL8865	ORTHOMCL6185	ORTHOMCL5156	ORTHOMCL5688	ORTHOMCL8868	ORTHOMCL6432
ORTHOMCL10493	ORTHOMCL9526	ORTHOMCL6278	ORTHOMCL5604	ORTHOMCL7503	ORTHOMCL5913	ORTHOMCL6076	ORTHOMCL4503	ORTHOMCL6412	ORTHOMCL5156	ORTHOMCL5893
ORTHOMCL10281	ORTHOMCL9834	ORTHOMCL9238	ORTHOMCL6204	ORTHOMCL10896	ORTHOMCL5494	ORTHOMCL10182	ORTHOMCL6892	ORTHOMCL8554	ORTHOMCL5619	ORTHOMCL5156
ORTHOMCL4614	ORTHOMCL8044	ORTHOMCL10399	ORTHOMCL7294	ORTHOMCL10839	ORTHOMCL10451	ORTHOMCL9853	ORTHOMCL5619	ORTHOMCL4638	ORTHOMCL4470	ORTHOMCL4503
ORTHOMCL10418	ORTHOMCL10409	ORTHOMCL10337	ORTHOMCL5341	ORTHOMCL10275	ORTHOMCL10987	ORTHOMCL5688	ORTHOMCL9427	ORTHOMCL4956	ORTHOMCL4858	ORTHOMCL6892
ORTHOMCL8495	ORTHOMCL5604	ORTHOMCL6632	ORTHOMCL10537	ORTHOMCL6847	ORTHOMCL7424	ORTHOMCL8738	ORTHOMCL4858	ORTHOMCL4590	ORTHOMCL4869	ORTHOMCL4437
ORTHOMCL6040	ORTHOMCL6204	ORTHOMCL9054	ORTHOMCL5089	ORTHOMCL8260	ORTHOMCL5798	ORTHOMCL6412	ORTHOMCL4869	ORTHOMCL6901	ORTHOMCL7009	ORTHOMCL5619
ORTHOMCL4950	ORTHOMCL5341	ORTHOMCL6215	ORTHOMCL7663	ORTHOMCL8901	ORTHOMCL10615	ORTHOMCL6526	ORTHOMCL7009	ORTHOMCL8868	ORTHOMCL5224	ORTHOMCL9427
ORTHOMCL5695	ORTHOMCL7178	ORTHOMCL9294	ORTHOMCL9070	ORTHOMCL4754	ORTHOMCL8694	ORTHOMCL4590	ORTHOMCL5224	ORTHOMCL5893	ORTHOMCL10795	ORTHOMCL4858
ORTHOMCL4828	ORTHOMCL10619	ORTHOMCL9491	ORTHOMCL7915	ORTHOMCL7601	ORTHOMCL8276	ORTHOMCL6901	ORTHOMCL10795	ORTHOMCL5156	ORTHOMCL4662	ORTHOMCL4869
ORTHOMCL5154	ORTHOMCL5579	ORTHOMCL9552	ORTHOMCL7513	ORTHOMCL5643	ORTHOMCL5488	ORTHOMCL6705	ORTHOMCL4872	ORTHOMCL9427	ORTHOMCL8731	ORTHOMCL9104
ORTHOMCL5321	ORTHOMCL9424	ORTHOMCL9439	ORTHOMCL4633	ORTHOMCL5672	ORTHOMCL5474	ORTHOMCL5156	ORTHOMCL4662	ORTHOMCL4858	ORTHOMCL6344	ORTHOMCL5224
ORTHOMCL4444	ORTHOMCL9070	ORTHOMCL5281	ORTHOMCL8163	ORTHOMCL10850	ORTHOMCL5006	ORTHOMCL10672	ORTHOMCL7053	ORTHOMCL4869	ORTHOMCL7396	ORTHOMCL10795
ORTHOMCL7820	ORTHOMCL8318	ORTHOMCL9172	ORTHOMCL10727	ORTHOMCL10316	ORTHOMCL9327	ORTHOMCL4503	ORTHOMCL8731	ORTHOMCL10795	ORTHOMCL9698	ORTHOMCL5076
ORTHOMCL6449	ORTHOMCL4810	ORTHOMCL10281	ORTHOMCL4810	ORTHOMCL7997	ORTHOMCL8200	ORTHOMCL6892	ORTHOMCL6344	ORTHOMCL4872	ORTHOMCL5062	ORTHOMCL8731
ORTHOMCL5355	ORTHOMCL8129	ORTHOMCL10418	ORTHOMCL9162	ORTHOMCL7731	ORTHOMCL5870	ORTHOMCL5029	ORTHOMCL7396	ORTHOMCL5076	ORTHOMCL5191	ORTHOMCL7012
ORTHOMCL4360	ORTHOMCL8028	ORTHOMCL10745	ORTHOMCL8129	ORTHOMCL5262	ORTHOMCL8057	ORTHOMCL4858	ORTHOMCL5062	ORTHOMCL8731	ORTHOMCL5374	ORTHOMCL7396
ORTHOMCL8620	ORTHOMCL4392	ORTHOMCL8495	ORTHOMCL10446	ORTHOMCL6130	ORTHOMCL10723	ORTHOMCL4869	ORTHOMCL5694	ORTHOMCL6344	ORTHOMCL7503	ORTHOMCL9698
ORTHOMCL10695	ORTHOMCL9954	ORTHOMCL6040	ORTHOMCL4392	ORTHOMCL9783	ORTHOMCL10625	ORTHOMCL9104	ORTHOMCL5191	ORTHOMCL7396	ORTHOMCL10896	ORTHOMCL5062
ORTHOMCL4847	ORTHOMCL10633	ORTHOMCL5695	ORTHOMCL10633	ORTHOMCL8476	ORTHOMCL8762	ORTHOMCL7009	ORTHOMCL6150	ORTHOMCL5062	ORTHOMCL10839	ORTHOMCL7696
ORTHOMCL5120	ORTHOMCL9765	ORTHOMCL9124	ORTHOMCL8968	ORTHOMCL6789	ORTHOMCL9061	ORTHOMCL10795	ORTHOMCL5374	ORTHOMCL5191	ORTHOMCL5537	ORTHOMCL5191
ORTHOMCL10105	ORTHOMCL8179	ORTHOMCL8822	ORTHOMCL4784	ORTHOMCL7675	ORTHOMCL4563	ORTHOMCL4662	ORTHOMCL7503	ORTHOMCL6150	ORTHOMCL10275	ORTHOMCL6150
ORTHOMCL5829	ORTHOMCL4728	ORTHOMCL5321	ORTHOMCL7507	ORTHOMCL9692	ORTHOMCL8573	ORTHOMCL8731	ORTHOMCL10896	ORTHOMCL5374	ORTHOMCL6847	ORTHOMCL5374
ORTHOMCL4750	ORTHOMCL5135	ORTHOMCL9642	ORTHOMCL10582	ORTHOMCL9238	ORTHOMCL4658	ORTHOMCL6344	ORTHOMCL10839	ORTHOMCL10896	ORTHOMCL8998	ORTHOMCL7503
ORTHOMCL6090	ORTHOMCL4461	ORTHOMCL4444	ORTHOMCL8005	ORTHOMCL10399	ORTHOMCL7927	ORTHOMCL7396	ORTHOMCL10275	ORTHOMCL10839	ORTHOMCL8260	ORTHOMCL10896
ORTHOMCL6081	ORTHOMCL10898	ORTHOMCL10088	ORTHOMCL6269	ORTHOMCL10337	ORTHOMCL8733	ORTHOMCL9698	ORTHOMCL6847	ORTHOMCL5537	ORTHOMCL8901	ORTHOMCL10839
ORTHOMCL6610	ORTHOMCL6555	ORTHOMCL6164	ORTHOMCL10393	ORTHOMCL6632	ORTHOMCL8044	ORTHOMCL5062	ORTHOMCL7827	ORTHOMCL6847	ORTHOMCL9647	ORTHOMCL10275
ORTHOMCL5427	ORTHOMCL6958	ORTHOMCL9812	ORTHOMCL8957	ORTHOMCL8441	ORTHOMCL10157	ORTHOMCL5694	ORTHOMCL8998	ORTHOMCL7827	ORTHOMCL5643	ORTHOMCL8998
ORTHOMCL4842	ORTHOMCL4866	ORTHOMCL10030	ORTHOMCL4461	ORTHOMCL9054	ORTHOMCL10409	ORTHOMCL5191	ORTHOMCL10539	ORTHOMCL8998	ORTHOMCL5672	ORTHOMCL10539
ORTHOMCL6400	ORTHOMCL8358	ORTHOMCL4360	ORTHOMCL8743	ORTHOMCL6215	ORTHOMCL6204	ORTHOMCL6150	ORTHOMCL8901	ORTHOMCL8260	ORTHOMCL10850	ORTHOMCL8901
ORTHOMCL9910	ORTHOMCL6339	ORTHOMCL5719	ORTHOMCL10898	ORTHOMCL9294	ORTHOMCL7294	ORTHOMCL5374	ORTHOMCL4754	ORTHOMCL10539	ORTHOMCL8611	ORTHOMCL9647
ORTHOMCL5687	ORTHOMCL6185	ORTHOMCL6203	ORTHOMCL6555	ORTHOMCL5107	ORTHOMCL5341	ORTHOMCL7503	ORTHOMCL5027	ORTHOMCL8901	ORTHOMCL10316	ORTHOMCL4754
ORTHOMCL7726	ORTHOMCL6076	ORTHOMCL7634	ORTHOMCL7347	ORTHOMCL9491	ORTHOMCL10537	ORTHOMCL10896	ORTHOMCL5643	ORTHOMCL9647	ORTHOMCL7731	ORTHOMCL5643
ORTHOMCL10212	ORTHOMCL6201	ORTHOMCL4671	ORTHOMCL8358	ORTHOMCL9552	ORTHOMCL7663	ORTHOMCL7806	ORTHOMCL5672	ORTHOMCL5027	ORTHOMCL6525	ORTHOMCL5672
ORTHOMCL8442	ORTHOMCL10182	ORTHOMCL7981	ORTHOMCL5650	ORTHOMCL9439	ORTHOMCL5319	ORTHOMCL10839	ORTHOMCL10850	ORTHOMCL5643	ORTHOMCL10293	ORTHOMCL10850
ORTHOMCL5505	ORTHOMCL6230	ORTHOMCL5362	ORTHOMCL4605	ORTHOMCL10493	ORTHOMCL9070	ORTHOMCL5537	ORTHOMCL8611	ORTHOMCL8169	ORTHOMCL5262	ORTHOMCL8611
	ORTHOMCL5784	ORTHOMCL5120	ORTHOMCL8515	ORTHOMCL10745	ORTHOMCL7915	ORTHOMCL10275	ORTHOMCL7997	ORTHOMCL5672	ORTHOMCL6130	ORTHOMCL7997
	ORTHOMCL9853	ORTHOMCL10105	ORTHOMCL10821	ORTHOMCL8495	ORTHOMCL8163	ORTHOMCL6847	ORTHOMCL7731	ORTHOMCL10850	ORTHOMCL8476	ORTHOMCL7731
	ORTHOMCL6412	ORTHOMCL8782	ORTHOMCL8508	ORTHOMCL6040	ORTHOMCL8318	ORTHOMCL7827	ORTHOMCL10293	ORTHOMCL7997	ORTHOMCL6789	ORTHOMCL6525
	ORTHOMCL6548	ORTHOMCL5184	ORTHOMCL6076	ORTHOMCL10540	ORTHOMCL4810	ORTHOMCL8998	ORTHOMCL4368	ORTHOMCL7482	ORTHOMCL7675	ORTHOMCL10293
	ORTHOMCL8868	ORTHOMCL9612	ORTHOMCL9853	ORTHOMCL5695	ORTHOMCL9162	ORTHOMCL10539	ORTHOMCL5262	ORTHOMCL6525	ORTHOMCL9692	ORTHOMCL5262
	ORTHOMCL5893	ORTHOMCL4735	ORTHOMCL5688	ORTHOMCL9124	ORTHOMCL10446	ORTHOMCL8901	ORTHOMCL6130	ORTHOMCL10293	ORTHOMCL10399	ORTHOMCL6130
	ORTHOMCL5156	ORTHOMCL6610	ORTHOMCL8738	ORTHOMCL5154	ORTHOMCL8028	ORTHOMCL9647	ORTHOMCL9813	ORTHOMCL4368	ORTHOMCL10337	ORTHOMCL9813
	ORTHOMCL5619	ORTHOMCL5427	ORTHOMCL6412	ORTHOMCL8822	ORTHOMCL4392	ORTHOMCL4754	ORTHOMCL8476	ORTHOMCL5262	ORTHOMCL9054	ORTHOMCL6789
	ORTHOMCL10110	ORTHOMCL10212	ORTHOMCL6526	ORTHOMCL5321	ORTHOMCL10633	ORTHOMCL5643	ORTHOMCL4891	ORTHOMCL6130	ORTHOMCL6215	ORTHOMCL9692
	ORTHOMCL5029	ORTHOMCL5505	ORTHOMCL6548	ORTHOMCL9642	ORTHOMCL7047	ORTHOMCL5672	ORTHOMCL6789	ORTHOMCL9813	ORTHOMCL5209	ORTHOMCL6278
	ORTHOMCL9641		ORTHOMCL4590	ORTHOMCL4444	ORTHOMCL4728	ORTHOMCL10850	ORTHOMCL10450	ORTHOMCL8476	ORTHOMCL9294	ORTHOMCL9238
	ORTHOMCL4858		ORTHOMCL6901	ORTHOMCL6164	ORTHOMCL8968	ORTHOMCL8611	ORTHOMCL9692	ORTHOMCL6789	ORTHOMCL9491	ORTHOMCL10399
	ORTHOMCL10207		ORTHOMCL8868	ORTHOMCL9812	ORTHOMCL7507	ORTHOMCL7731	ORTHOMCL6355	ORTHOMCL10450	ORTHOMCL9552	ORTHOMCL10337
	ORTHOMCL4869		ORTHOMCL6432	ORTHOMCL10030	ORTHOMCL8005	ORTHOMCL4368	ORTHOMCL9238	ORTHOMCL9692	ORTHOMCL9439	ORTHOMCL6632
	ORTHOMCL9104		ORTHOMCL5156	ORTHOMCL4360	ORTHOMCL5135	ORTHOMCL5262	ORTHOMCL10399	ORTHOMCL6278	ORTHOMCL8495	ORTHOMCL9054
	ORTHOMCL5224		ORTHOMCL10672	ORTHOMCL5855	ORTHOMCL10393	ORTHOMCL6130	ORTHOMCL10337	ORTHOMCL6355	ORTHOMCL6040	ORTHOMCL6215
	ORTHOMCL7504		ORTHOMCL10931	ORTHOMCL8700	ORTHOMCL10898	ORTHOMCL8476	ORTHOMCL6632	ORTHOMCL9238	ORTHOMCL10540	ORTHOMCL9294
	ORTHOMCL5716		ORTHOMCL4503	ORTHOMCL10695	ORTHOMCL6555	ORTHOMCL6789	ORTHOMCL8441	ORTHOMCL10399	ORTHOMCL5695	ORTHOMCL9491
	ORTHOMCL4662		ORTHOMCL5619	ORTHOMCL7634	ORTHOMCL6469	ORTHOMCL9692	ORTHOMCL9054	ORTHOMCL10337	ORTHOMCL4944	ORTHOMCL9552
	ORTHOMCL5076		ORTHOMCL4470	ORTHOMCL5362	ORTHOMCL5181	ORTHOMCL6278	ORTHOMCL9294	ORTHOMCL6632	ORTHOMCL5154	ORTHOMCL9439
	ORTHOMCL8731		ORTHOMCL9191	ORTHOMCL10280	ORTHOMCL7347	ORTHOMCL4489	ORTHOMCL9491	ORTHOMCL9054	ORTHOMCL5321	ORTHOMCL9172
	ORTHOMCL6344		ORTHOMCL4858	ORTHOMCL5120	ORTHOMCL5904	ORTHOMCL9238	ORTHOMCL9552	ORTHOMCL6215	ORTHOMCL9642	ORTHOMCL10281
	ORTHOMCL5062		ORTHOMCL4869	ORTHOMCL10105	ORTHOMCL8358	ORTHOMCL10399	ORTHOMCL9439	ORTHOMCL9294	ORTHOMCL4444	ORTHOMCL10418
	ORTHOMCL5694		ORTHOMCL9104	ORTHOMCL9612	ORTHOMCL6339	ORTHOMCL10337	ORTHOMCL9172	ORTHOMCL9491	ORTHOMCL10088	ORTHOMCL10745
	ORTHOMCL7696		ORTHOMCL5224	ORTHOMCL8266	ORTHOMCL4605	ORTHOMCL6632	ORTHOMCL10281	ORTHOMCL9552	ORTHOMCL4731	ORTHOMCL8495
	ORTHOMCL5191		ORTHOMCL10795	ORTHOMCL7231	ORTHOMCL8515	ORTHOMCL8441	ORTHOMCL10418	ORTHOMCL9439	ORTHOMCL6164	ORTHOMCL6040
	ORTHOMCL6150		ORTHOMCL4872	ORTHOMCL6610	ORTHOMCL6185	ORTHOMCL9054	ORTHOMCL10745	ORTHOMCL10493	ORTHOMCL9812	ORTHOMCL10540
	ORTHOMCL10405		ORTHOMCL4662	ORTHOMCL5427	ORTHOMCL6076	ORTHOMCL6215	ORTHOMCL8495	ORTHOMCL9172	ORTHOMCL10030	ORTHOMCL9124
	ORTHOMCL4699		ORTHOMCL8731	ORTHOMCL4842	ORTHOMCL10182	ORTHOMCL4775	ORTHOMCL6040	ORTHOMCL10281	ORTHOMCL4360	ORTHOMCL5154
	ORTHOMCL10896		ORTHOMCL7396	ORTHOMCL9335	ORTHOMCL5784	ORTHOMCL9294	ORTHOMCL10540	ORTHOMCL10745	ORTHOMCL5855	ORTHOMCL8822
	ORTHOMCL7806		ORTHOMCL5062	ORTHOMCL9370	ORTHOMCL9853	ORTHOMCL9491	ORTHOMCL5695	ORTHOMCL8495	ORTHOMCL8620	ORTHOMCL5321
	ORTHOMCL10275		ORTHOMCL5694	ORTHOMCL10212	ORTHOMCL5688	ORTHOMCL9552	ORTHOMCL4944	ORTHOMCL6040	ORTHOMCL8700	ORTHOMCL9642
	ORTHOMCL6847		ORTHOMCL5191	ORTHOMCL5505	ORTHOMCL8738	ORTHOMCL9439	ORTHOMCL9124	ORTHOMCL10540	ORTHOMCL6203	ORTHOMCL4444
	ORTHOMCL8998		ORTHOMCL6150		ORTHOMCL6412	ORTHOMCL9172	ORTHOMCL8822	ORTHOMCL4944	ORTHOMCL7634	ORTHOMCL10088
	ORTHOMCL8901		ORTHOMCL5374		ORTHOMCL6526	ORTHOMCL10281	ORTHOMCL5321	ORTHOMCL9124	ORTHOMCL5362	ORTHOMCL6164
	ORTHOMCL4754		ORTHOMCL7503		ORTHOMCL4590	ORTHOMCL10745	ORTHOMCL9642	ORTHOMCL5154	ORTHOMCL5351	ORTHOMCL9812
	ORTHOMCL7601		ORTHOMCL10896		ORTHOMCL6901	ORTHOMCL6040	ORTHOMCL4444	ORTHOMCL8822	ORTHOMCL5120	ORTHOMCL10030
	ORTHOMCL5672		ORTHOMCL10839		ORTHOMCL6705	ORTHOMCL5276	ORTHOMCL10088	ORTHOMCL5321	ORTHOMCL10105	ORTHOMCL4360
	ORTHOMCL7997		ORTHOMCL10275		ORTHOMCL5893	ORTHOMCL4944	ORTHOMCL4731	ORTHOMCL9642	ORTHOMCL8782	ORTHOMCL5855
	ORTHOMCL7482		ORTHOMCL6847		ORTHOMCL5156	ORTHOMCL9124	ORTHOMCL6164	ORTHOMCL4444	ORTHOMCL6090	ORTHOMCL5719
	ORTHOMCL6525		ORTHOMCL8998		ORTHOMCL10672	ORTHOMCL8822	ORTHOMCL9812	ORTHOMCL10088	ORTHOMCL4735	ORTHOMCL7634
	ORTHOMCL10293		ORTHOMCL10539		ORTHOMCL4503	ORTHOMCL5321	ORTHOMCL7020	ORTHOMCL7820	ORTHOMCL7231	ORTHOMCL5351
	ORTHOMCL5262		ORTHOMCL8901		ORTHOMCL6892	ORTHOMCL9642	ORTHOMCL4360	ORTHOMCL6164	ORTHOMCL6610	ORTHOMCL5120
	ORTHOMCL6130		ORTHOMCL9647		ORTHOMCL5619	ORTHOMCL4444	ORTHOMCL5855	ORTHOMCL9812	ORTHOMCL5427	ORTHOMCL10105
	ORTHOMCL6885		ORTHOMCL4754		ORTHOMCL4470	ORTHOMCL10088	ORTHOMCL8700	ORTHOMCL10030	ORTHOMCL10212	ORTHOMCL5184
	ORTHOMCL7675		ORTHOMCL5027		ORTHOMCL9427	ORTHOMCL6164	ORTHOMCL6203	ORTHOMCL4360	ORTHOMCL4668	ORTHOMCL6090
	ORTHOMCL9238		ORTHOMCL5643		ORTHOMCL4858	ORTHOMCL9812	ORTHOMCL7634	ORTHOMCL5855	ORTHOMCL5505	ORTHOMCL4735
	ORTHOMCL10337		ORTHOMCL5672		ORTHOMCL4869	ORTHOMCL10030	ORTHOMCL5362	ORTHOMCL8700		ORTHOMCL6610
	ORTHOMCL7373		ORTHOMCL10850		ORTHOMCL9104	ORTHOMCL4360	ORTHOMCL5120	ORTHOMCL6203		ORTHOMCL5427
	ORTHOMCL6632		ORTHOMCL8611		ORTHOMCL7009	ORTHOMCL5855	ORTHOMCL10105	ORTHOMCL7634		ORTHOMCL9335
	ORTHOMCL9054		ORTHOMCL7997		ORTHOMCL8511	ORTHOMCL8700	ORTHOMCL8782	ORTHOMCL4534		ORTHOMCL10212
	ORTHOMCL10095		ORTHOMCL7731		ORTHOMCL10795	ORTHOMCL5719	ORTHOMCL5184	ORTHOMCL5120		ORTHOMCL5505
	ORTHOMCL9294		ORTHOMCL9166		ORTHOMCL4872	ORTHOMCL6203	ORTHOMCL9612	ORTHOMCL10105
	ORTHOMCL4860		ORTHOMCL10293		ORTHOMCL4662	ORTHOMCL7634	ORTHOMCL4735	ORTHOMCL8782
	ORTHOMCL6398		ORTHOMCL4368		ORTHOMCL8731	ORTHOMCL5362	ORTHOMCL6610	ORTHOMCL5184
	ORTHOMCL9552		ORTHOMCL5262		ORTHOMCL6344	ORTHOMCL5120	ORTHOMCL5427	ORTHOMCL6090
	ORTHOMCL9439		ORTHOMCL6130		ORTHOMCL7396	ORTHOMCL10105	ORTHOMCL5458	ORTHOMCL9612
	ORTHOMCL10493		ORTHOMCL9783		ORTHOMCL9698	ORTHOMCL8782	ORTHOMCL10212	ORTHOMCL4735
	ORTHOMCL10418		ORTHOMCL6789		ORTHOMCL5062	ORTHOMCL5184	ORTHOMCL4668	ORTHOMCL7231
	ORTHOMCL10745		ORTHOMCL9692		ORTHOMCL5694	ORTHOMCL6090	ORTHOMCL5505	ORTHOMCL5458
	ORTHOMCL8495		ORTHOMCL6278		ORTHOMCL5191	ORTHOMCL9612		ORTHOMCL10212
	ORTHOMCL10857		ORTHOMCL9238		ORTHOMCL5374	ORTHOMCL4735		ORTHOMCL4668
	ORTHOMCL9622		ORTHOMCL10399		ORTHOMCL7503	ORTHOMCL6610		ORTHOMCL5505
	ORTHOMCL4950		ORTHOMCL10337		ORTHOMCL10896	ORTHOMCL5427
	ORTHOMCL10540		ORTHOMCL6632		ORTHOMCL7806	ORTHOMCL6400
	ORTHOMCL9176		ORTHOMCL9054		ORTHOMCL10839	ORTHOMCL9370
	ORTHOMCL4944		ORTHOMCL6215		ORTHOMCL10275	ORTHOMCL10212
	ORTHOMCL9124		ORTHOMCL4775		ORTHOMCL6847	ORTHOMCL5505
	ORTHOMCL5154		ORTHOMCL9294		ORTHOMCL8998
	ORTHOMCL8822		ORTHOMCL9491		ORTHOMCL10539
	ORTHOMCL5321		ORTHOMCL9552		ORTHOMCL5569
	ORTHOMCL7898		ORTHOMCL9439		ORTHOMCL8901
	ORTHOMCL9642		ORTHOMCL9172		ORTHOMCL9647
	ORTHOMCL4444		ORTHOMCL10281		ORTHOMCL4754
	ORTHOMCL6164		ORTHOMCL10745		ORTHOMCL7601
	ORTHOMCL8217		ORTHOMCL8495		ORTHOMCL5643
	ORTHOMCL9812		ORTHOMCL6040		ORTHOMCL5672
	ORTHOMCL4360		ORTHOMCL10540		ORTHOMCL10850
	ORTHOMCL8700		ORTHOMCL5695		ORTHOMCL7997
	ORTHOMCL7634		ORTHOMCL4828		ORTHOMCL7731
	ORTHOMCL5120		ORTHOMCL9124		ORTHOMCL6525
	ORTHOMCL10105		ORTHOMCL8822		ORTHOMCL10293
	ORTHOMCL5184		ORTHOMCL5321		ORTHOMCL4368
	ORTHOMCL4735		ORTHOMCL9642		ORTHOMCL5262
	ORTHOMCL6081		ORTHOMCL4444		ORTHOMCL6130
	ORTHOMCL6610		ORTHOMCL10088		ORTHOMCL9783
	ORTHOMCL5427		ORTHOMCL6164		ORTHOMCL8476
	ORTHOMCL4842		ORTHOMCL9812		ORTHOMCL6789
	ORTHOMCL6400		ORTHOMCL10030		ORTHOMCL6480
	ORTHOMCL9910		ORTHOMCL4360		ORTHOMCL9692
	ORTHOMCL10212		ORTHOMCL5855		ORTHOMCL4489
	ORTHOMCL5505		ORTHOMCL5719		ORTHOMCL9238
			ORTHOMCL6203		ORTHOMCL10399
			ORTHOMCL7634		ORTHOMCL10337
			ORTHOMCL5362		ORTHOMCL6632
			ORTHOMCL5120		ORTHOMCL9054
			ORTHOMCL10105		ORTHOMCL9405
			ORTHOMCL8782		ORTHOMCL6215
			ORTHOMCL5184		ORTHOMCL9294
			ORTHOMCL6617		ORTHOMCL9491
			ORTHOMCL6090		ORTHOMCL9552
			ORTHOMCL9612		ORTHOMCL9439
			ORTHOMCL4735		ORTHOMCL10493
			ORTHOMCL9490		ORTHOMCL9172
			ORTHOMCL6610		ORTHOMCL5389
			ORTHOMCL10212		ORTHOMCL10281
			ORTHOMCL5505		ORTHOMCL10745
					ORTHOMCL8495
					ORTHOMCL9176
					ORTHOMCL5695
					ORTHOMCL9124
					ORTHOMCL5321
					ORTHOMCL4444
					ORTHOMCL10088
					ORTHOMCL6164
					ORTHOMCL9812
					ORTHOMCL10030
					ORTHOMCL4360
					ORTHOMCL5855
					ORTHOMCL8700
					ORTHOMCL5719
					ORTHOMCL6203
					ORTHOMCL7634
					ORTHOMCL5362
					ORTHOMCL5120
					ORTHOMCL10105
					ORTHOMCL5184
					ORTHOMCL6090
					ORTHOMCL9612
					ORTHOMCL4735
					ORTHOMCL7231
					ORTHOMCL6610
					ORTHOMCL5427
					ORTHOMCL10212
					ORTHOMCL5505
