# Supplementary material for: Comparative transcriptomics provides a strategy for phylogenetic analysis and SSR marker development in Chaenomeles
Source: Sci Rep. 2021 Aug 12;11:16441. doi: 10.1038/s41598-021-95776-z (PMC8361139; doi:10.1038/s41598-021-95776-z)
Supplement: Supplementary file 10 — Supplementary Table S9. [file 41598_2021_95776_MOESM10_ESM.xlsx]

## Sheet: GP
KEGG analysis for 292 common single copy genes containing SSR sites in Chaenomeles sinensis(GP)
Pathway	out (60)	All (6388)	Pvalue	Qvalue	Pathway ID	Genes	K_IDs
Pyruvate metabolism	4	112	0.020578	0.497994	ko00620	Unigene0000453;Unigene0018167;Unigene0033267;Unigene0034976	K00029+K18881+K00627+K01595
Thiamine metabolism	2	24	0.0209712	0.497994	ko00730	Unigene0033632;Unigene0036582	K01662+K14153
Ribosome biogenesis in eukaryotes	4	120	0.0257583	0.497994	ko03008	Unigene0000270;Unigene0001708;Unigene0033081;Unigene0042689	K14521+K11131+K14565+K14574
Biosynthesis of secondary metabolites	18	1325	0.0573327	0.599719	ko01110	Unigene0002418;Unigene0004358;Unigene0004703;Unigene0012339;Unigene0017161;Unigene0018242;Unigene0030755;Unigene0032327;Unigene0032995;Unigene0033267;Unigene0033289;Unigene0033632;Unigene0033659;Unigene0034592;Unigene0036070;Unigene0039322;Unigene0041319;Unigene0042169	K00602+K01114+K08101+K00514+K01904+K01900+K01835+K03404+K00826+K00627+K00705+K01662+K00800+K00981+K19269+K00991+K15397+K12502
Carbon metabolism	6	330	0.0878615	0.599719	ko01200	Unigene0000453;Unigene0009524;Unigene0018242;Unigene0033267;Unigene0034976;Unigene0036070	K00029+K18121+K01900+K00627+K01595+K19269
Glucosinolate biosynthesis	1	11	0.0986744	0.599719	ko00966	Unigene0032995	K00826
Spliceosome	5	263	0.0996611	0.599719	ko03040	Unigene0001453;Unigene0008673;Unigene0022259;Unigene0031066;Unigene0034905	K12896+K12835+K12875+K12836+K12826
Porphyrin and chlorophyll metabolism	2	59	0.105699	0.599719	ko00860	Unigene0004703;Unigene0032327	K08101+K03404
Amino sugar and nucleotide sugar metabolism	3	124	0.110342	0.599719	ko00520	Unigene0004486;Unigene0030755;Unigene0036501	K13648+K01835+K13648
Glycerophospholipid metabolism	3	125	0.112333	0.599719	ko00564	Unigene0002170;Unigene0004358;Unigene0034592	K00995+K01114+K00981
Ubiquinone and other terpenoid-quinone biosynthesis	2	65	0.12408	0.599719	ko00130	Unigene0017161;Unigene0042169	K01904+K12502
Terpenoid backbone biosynthesis	2	65	0.12408	0.599719	ko00900	Unigene0033632;Unigene0039322	K01662+K00991
Other types of O-glycan biosynthesis	1	16	0.140299	0.613858	ko00514	Unigene0000269	K09667
Arachidonic acid metabolism	1	17	0.148394	0.613858	ko00590	Unigene0034838	K15730
Citrate cycle (TCA cycle)	2	80	0.172852	0.613858	ko00020	Unigene0018242;Unigene0033267	K01900+K00627
Aminoacyl-tRNA biosynthesis	2	80	0.172852	0.613858	ko00970	Unigene0000525;Unigene0032303	K01873+K01889
RNA transport	4	240	0.187746	0.613858	ko03013	Unigene0008603;Unigene0022259;Unigene0034596;Unigene0038538	K14300+K12875+K03252+K03262
Glyoxylate and dicarboxylate metabolism	2	87	0.196587	0.613858	ko00630	Unigene0009524;Unigene0036070	K18121+K19269
Butanoate metabolism	1	24	0.202998	0.613858	ko00650	Unigene0009524	K18121
Carbon fixation in photosynthetic organisms	2	92	0.213787	0.613858	ko00710	Unigene0000453;Unigene0034976	K00029+K01595
One carbon pool by folate	1	28	0.23264	0.613858	ko00670	Unigene0002418	K00602
Valine, leucine and isoleucine biosynthesis	1	29	0.239879	0.613858	ko00290	Unigene0032995	K00826
Metabolic pathways	26	2453	0.254188	0.613858	ko01100	Unigene0000003;Unigene0000453;Unigene0000559;Unigene0002170;Unigene0002418;Unigene0004358;Unigene0009524;Unigene0012339;Unigene0017161;Unigene0018242;Unigene0030755;Unigene0032327;Unigene0032995;Unigene0033267;Unigene0033289;Unigene0033632;Unigene0033659;Unigene0034592;Unigene0034838;Unigene0034976;Unigene0036070;Unigene0036582;Unigene0039322;Unigene0039851;Unigene0041319;Unigene0042169	K00737+K00029+K00889+K00995+K00602+K01114+K18121+K00514+K01904+K01900+K01835+K03404+K00826+K00627+K00705+K01662+K00800+K00981+K15730+K01595+K19269+K14153+K00991+K03005+K15397+K12502
Inositol phosphate metabolism	2	110	0.276571	0.613858	ko00562	Unigene0000559;Unigene0004358	K00889+K01114
Phosphatidylinositol signaling system	2	110	0.276571	0.613858	ko04070	Unigene0000559;Unigene0034592	K00889+K00981
Ether lipid metabolism	1	36	0.288707	0.613858	ko00565	Unigene0004358	K01114
Pantothenate and CoA biosynthesis	1	39	0.308676	0.613858	ko00770	Unigene0032995	K00826
Fatty acid elongation	1	43	0.334447	0.613858	ko00062	Unigene0041319	K15397
Nitrogen metabolism	1	44	0.340741	0.613858	ko00910	Unigene0032667	K01673
Carotenoid biosynthesis	1	46	0.353153	0.613858	ko00906	Unigene0012339	K00514
Phenylalanine, tyrosine and tryptophan biosynthesis	1	49	0.371342	0.613858	ko00400	Unigene0033659	K00800
Propanoate metabolism	1	49	0.371342	0.613858	ko00640	Unigene0018242	K01900
Purine metabolism	3	234	0.377893	0.613858	ko00230	Unigene0002418;Unigene0030755;Unigene0039851	K00602+K01835+K03005
SNARE interactions in vesicular transport	1	52	0.389027	0.613858	ko04130	Unigene0022211	K08490
Base excision repair	1	53	0.394813	0.613858	ko03410	Unigene0041286	K10801
Glycolysis / Gluconeogenesis	2	146	0.400295	0.613858	ko00010	Unigene0030755;Unigene0033267	K01835+K00627
Galactose metabolism	1	55	0.406223	0.613858	ko00052	Unigene0030755	K01835
Pentose phosphate pathway	1	59	0.428413	0.613858	ko00030	Unigene0030755	K01835
Starch and sucrose metabolism	2	156	0.433135	0.613858	ko00500	Unigene0030755;Unigene0033289	K01835+K00705
Phenylalanine metabolism	1	60	0.433832	0.613858	ko00360	Unigene0017161	K01904
Valine, leucine and isoleucine degradation	1	62	0.444518	0.613858	ko00280	Unigene0032995	K00826
N-Glycan biosynthesis	1	62	0.444518	0.613858	ko00510	Unigene0000003	K00737
mRNA surveillance pathway	2	163	0.455567	0.614486	ko03015	Unigene0008796;Unigene0022259	K14416+K12875
MAPK signaling pathway - plant	2	169	0.4744	0.619158	ko04016	Unigene0026138;Unigene0032232	K13422+K13414
Proteasome	1	69	0.480382	0.619158	ko03050	Unigene0001894	K03033
2-Oxocarboxylic acid metabolism	1	74	0.504594	0.636228	ko01210	Unigene0032995	K00826
Ubiquitin mediated proteolysis	2	186	0.525627	0.648646	ko04120	Unigene0034182;Unigene0038143	K10598+K10609
RNA polymerase	1	82	0.541046	0.653764	ko03020	Unigene0039851	K03005
Plant-pathogen interaction	4	432	0.585784	0.685305	ko04626	Unigene0018216;Unigene0032232;Unigene0035381;Unigene0041319	K02358+K13414+K09422+K15397
Nucleotide excision repair	1	95	0.594733	0.685305	ko03420	Unigene0038143	K10609
Endocytosis	2	214	0.602595	0.685305	ko04144	Unigene0000559;Unigene0011800	K00889+K18466
Peroxisome	1	109	0.64565	0.717573	ko04146	Unigene0025571	K06664
Cysteine and methionine metabolism	1	112	0.655713	0.717573	ko00270	Unigene0032995	K00826
Plant hormone signal transduction	2	286	0.757309	0.813406	ko04075	Unigene0026138;Unigene0033192	K13422+K14489
Biosynthesis of amino acids	2	296	0.774196	0.816425	ko01230	Unigene0032995;Unigene0033659	K00826+K00800
Phenylpropanoid biosynthesis	1	176	0.814407	0.839383	ko00940	Unigene0017161	K01904
Pyrimidine metabolism	1	182	0.82491	0.839383	ko00240	Unigene0039851	K03005
Protein processing in endoplasmic reticulum	1	282	0.934246	0.934246	ko04141	Unigene0032412	K09523

## Sheet: MY
KEGG analysis for 292 common single copy genes containing SSR sites in Chaenomeles cathayensis(MY)
Pathway	out (60)	All (6365)	Pvalue	Qvalue	Pathway ID	Genes	K_IDs
Ribosome biogenesis in eukaryotes	4	101	0.0147707	0.588867	ko03008	Unigene0018476;Unigene0030946;Unigene0032451;Unigene0039260	K11131+K14565+K14521+K14574
Thiamine metabolism	2	30	0.0320999	0.588867	ko00730	Unigene0038066;Unigene0039529	K14153+K01662
Pyruvate metabolism	4	152	0.0544125	0.588867	ko00620	Unigene0005158;Unigene0012717;Unigene0031456;Unigene0036498	K18881+K01595+K00029+K00627
Biosynthesis of secondary metabolites	18	1325	0.0590854	0.588867	ko01110	Unigene0008650;Unigene0010198;Unigene0010623;Unigene0013291;Unigene0019378;Unigene0022251;Unigene0031489;Unigene0031704;Unigene0033033;Unigene0034110;Unigene0035795;Unigene0035880;Unigene0036498;Unigene0036910;Unigene0038082;Unigene0039529;Unigene0039677;Unigene0039870	K00826+K00800+K15397+K19269+K03404+K00981+K01900+K00705+K00991+K01904+K01114+K08101+K00627+K00514+K00602+K01662+K12502+K01835
Ubiquinone and other terpenoid-quinone biosynthesis	2	54	0.0915831	0.588867	ko00130	Unigene0034110;Unigene0039677	K01904+K12502
Glycerophospholipid metabolism	3	114	0.0919867	0.588867	ko00564	Unigene0022251;Unigene0026901;Unigene0035795	K00981+K00995+K01114
Terpenoid backbone biosynthesis	2	55	0.0944819	0.588867	ko00900	Unigene0033033;Unigene0039529	K00991+K01662
Porphyrin and chlorophyll metabolism	2	56	0.0974073	0.588867	ko00860	Unigene0019378;Unigene0035880	K03404+K08101
Spliceosome	5	268	0.107051	0.588867	ko03040	Unigene0005124;Unigene0020490;Unigene0032586;Unigene0034779;Unigene0036678	K12826+K12875+K12896+K12835+K12836
Glucosinolate biosynthesis	1	15	0.132575	0.588867	ko00966	Unigene0008650	K00826
Aminoacyl-tRNA biosynthesis	2	70	0.140757	0.588867	ko00970	Unigene0034970;Unigene0040405	K01889+K01873
Amino sugar and nucleotide sugar metabolism	3	151	0.169772	0.588867	ko00520	Unigene0000399;Unigene0038972;Unigene0039870	K13648+K13648+K01835
Carbon metabolism	6	400	0.173246	0.588867	ko01200	Unigene0012717;Unigene0013291;Unigene0031456;Unigene0031489;Unigene0036498;Unigene0040642	K01595+K19269+K00029+K01900+K00627+K18121
Valine, leucine and isoleucine biosynthesis	1	21	0.180623	0.588867	ko00290	Unigene0008650	K00826
Other types of O-glycan biosynthesis	1	22	0.188373	0.588867	ko00514	Unigene0027617	K09667
Arachidonic acid metabolism	1	22	0.188373	0.588867	ko00590	Unigene0026359	K15730
Butanoate metabolism	1	24	0.203656	0.588867	ko00650	Unigene0040642	K18121
RNA transport	4	249	0.206889	0.588867	ko03013	Unigene0020490;Unigene0035184;Unigene0038138;Unigene0039741	K12875+K03262+K14300+K03252
Citrate cycle (TCA cycle)	2	93	0.218409	0.588867	ko00020	Unigene0031489;Unigene0036498	K01900+K00627
Inositol phosphate metabolism	2	93	0.218409	0.588867	ko00562	Unigene0035518;Unigene0035795	K00889+K01114
One carbon pool by folate	1	26	0.218656	0.588867	ko00670	Unigene0038082	K00602
Ether lipid metabolism	1	28	0.233378	0.588867	ko00565	Unigene0035795	K01114
Phosphatidylinositol signaling system	2	99	0.239348	0.588867	ko04070	Unigene0022251;Unigene0035518	K00981+K00889
Metabolic pathways	26	2445	0.254862	0.588867	ko01100	Unigene0008650;Unigene0010198;Unigene0010623;Unigene0012717;Unigene0013291;Unigene0019378;Unigene0020015;Unigene0022251;Unigene0026359;Unigene0026901;Unigene0031456;Unigene0031489;Unigene0031704;Unigene0033033;Unigene0034110;Unigene0035518;Unigene0035795;Unigene0036498;Unigene0036910;Unigene0038066;Unigene0038082;Unigene0039059;Unigene0039529;Unigene0039677;Unigene0039870;Unigene0040642	K00826+K00800+K15397+K01595+K19269+K03404+K00737+K00981+K15730+K00995+K00029+K01900+K00705+K00991+K01904+K00889+K01114+K00627+K00514+K14153+K00602+K03005+K01662+K12502+K01835+K18121
Carbon fixation in photosynthetic organisms	2	114	0.292007	0.588867	ko00710	Unigene0012717;Unigene0031456	K01595+K00029
Fatty acid elongation	1	37	0.296323	0.588867	ko00062	Unigene0010623	K15397
Pantothenate and CoA biosynthesis	1	37	0.296323	0.588867	ko00770	Unigene0008650	K00826
Nitrogen metabolism	1	37	0.296323	0.588867	ko00910	Unigene0035293	K01673
Carotenoid biosynthesis	1	38	0.302995	0.588867	ko00906	Unigene0036910	K00514
Purine metabolism	3	205	0.304586	0.588867	ko00230	Unigene0038082;Unigene0039059;Unigene0039870	K00602+K03005+K01835
SNARE interactions in vesicular transport	1	42	0.329067	0.615674	ko04130	Unigene0026588	K08490
Glyoxylate and dicarboxylate metabolism	2	129	0.344284	0.624015	ko00630	Unigene0013291;Unigene0040642	K19269+K18121
Phenylalanine, tyrosine and tryptophan biosynthesis	1	49	0.372404	0.627007	ko00400	Unigene0010198	K00800
Propanoate metabolism	1	50	0.378366	0.627007	ko00640	Unigene0031489	K01900
Base excision repair	1	50	0.378366	0.627007	ko03410	Unigene0007773	K10801
N-Glycan biosynthesis	1	52	0.390124	0.628533	ko00510	Unigene0020015	K00737
mRNA surveillance pathway	2	149	0.412018	0.631829	ko03015	Unigene0020490;Unigene0031564	K12875+K14416
Phenylalanine metabolism	1	62	0.445708	0.631829	ko00360	Unigene0034110	K01904
RNA polymerase	1	62	0.445708	0.631829	ko03020	Unigene0039059	K03005
Plant-pathogen interaction	4	365	0.453738	0.631829	ko04626	Unigene0010623;Unigene0019092;Unigene0029245;Unigene0040998	K15397+K02358+K13414+K09422
Starch and sucrose metabolism	2	165	0.463765	0.631829	ko00500	Unigene0031704;Unigene0039870	K00705+K01835
Galactose metabolism	1	70	0.486562	0.631829	ko00052	Unigene0039870	K01835
Ubiquitin mediated proteolysis	2	173	0.48866	0.631829	ko04120	Unigene0019786;Unigene0032477	K10598+K10609
Proteasome	1	71	0.491456	0.631829	ko03050	Unigene0001369	K03033
Pentose phosphate pathway	1	73	0.501106	0.631829	ko00030	Unigene0039870	K01835
Valine, leucine and isoleucine degradation	1	73	0.501106	0.631829	ko00280	Unigene0008650	K00826
2-Oxocarboxylic acid metabolism	1	77	0.519869	0.641541	ko01210	Unigene0008650	K00826
MAPK signaling pathway - plant	2	197	0.558977	0.67543	ko04016	Unigene0029245;Unigene0038507	K13414+K13422
Nucleotide excision repair	1	89	0.572094	0.677173	ko03420	Unigene0032477	K10609
Glycolysis / Gluconeogenesis	2	212	0.599409	0.695314	ko00010	Unigene0036498;Unigene0039870	K00627+K01835
Endocytosis	2	229	0.64188	0.729981	ko04144	Unigene0035518;Unigene0037356	K00889+K18466
Cysteine and methionine metabolism	1	118	0.676339	0.754378	ko00270	Unigene0008650	K00826
Plant hormone signal transduction	2	258	0.706216	0.77284	ko04075	Unigene0022008;Unigene0038507	K14489+K13422
Peroxisome	1	135	0.725372	0.779103	ko04146	Unigene0009213	K06664
Phenylpropanoid biosynthesis	1	142	0.743368	0.783916	ko00940	Unigene0034110	K01904
Pyrimidine metabolism	1	150	0.762518	0.789751	ko00240	Unigene0039059	K03005
Biosynthesis of amino acids	2	301	0.783984	0.797738	ko01230	Unigene0008650;Unigene0010198	K00826+K00800
Protein processing in endoplasmic reticulum	1	306	0.948712	0.948712	ko04141	Unigene0027759	K09523

## Sheet: MYXZ
KEGG analysis for 292 common single copy genes containing SSR sites in Chaenomeles thibetica(MYXZ)
Pathway	out (44)	All (7938)	Pvalue	Qvalue	Pathway ID	Genes	K_IDs
Glycerophospholipid metabolism	3	111	0.0232671	0.503731	ko00564	Unigene0008396;Unigene0010597;Unigene0044935	K00981+K01114+K00995
Biosynthesis of secondary metabolites	16	1820	0.0301878	0.503731	ko01110	Unigene0001077;Unigene0001132;Unigene0002286;Unigene0004795;Unigene0008396;Unigene0010597;Unigene0011131;Unigene0013189;Unigene0017801;Unigene0032794;Unigene0044160;Unigene0044461;Unigene0045582;Unigene0045829;Unigene0047002;Unigene0048980	K15397+K01662+K08101+K12502+K00981+K01114+K00826+K19269+K00514+K03404+K01835+K01900+K00627+K00800+K00991+K00602
Terpenoid backbone biosynthesis	2	60	0.0433916	0.503731	ko00900	Unigene0001132;Unigene0047002	K01662+K00991
Porphyrin and chlorophyll metabolism	2	63	0.0473836	0.503731	ko00860	Unigene0002286;Unigene0032794	K08101+K03404
Glucosinolate biosynthesis	1	13	0.069761	0.503731	ko00966	Unigene0011131	K00826
Aminoacyl-tRNA biosynthesis	2	83	0.0770691	0.503731	ko00970	Unigene0000392;Unigene0044384	K01873+K01889
Other types of O-glycan biosynthesis	1	19	0.100332	0.503731	ko00514	Unigene0003430	K09667
Phosphatidylinositol signaling system	2	99	0.104015	0.503731	ko04070	Unigene0008396;Unigene0027210	K00981+K00889
Inositol phosphate metabolism	2	104	0.112905	0.503731	ko00562	Unigene0010597;Unigene0027210	K01114+K00889
Pyruvate metabolism	3	215	0.115798	0.503731	ko00620	Unigene0035188;Unigene0045582;Unigene0049281	K00029+K00627+K01595
Ribosome biogenesis in eukaryotes	2	110	0.123826	0.503731	ko03008	Unigene0028321;Unigene0048313	K14565+K14574
Ether lipid metabolism	1	29	0.149115	0.503731	ko00565	Unigene0010597	K01114
Valine, leucine and isoleucine biosynthesis	1	32	0.163239	0.503731	ko00290	Unigene0011131	K00826
One carbon pool by folate	1	33	0.167896	0.503731	ko00670	Unigene0048980	K00602
Purine metabolism	3	259	0.172421	0.503731	ko00230	Unigene0044160;Unigene0047832;Unigene0048980	K01835+K03005+K00602
Metabolic pathways	21	3171	0.183002	0.503731	ko01100	Unigene0001077;Unigene0001132;Unigene0004795;Unigene0008396;Unigene0010597;Unigene0011131;Unigene0013189;Unigene0017801;Unigene0027210;Unigene0032794;Unigene0035188;Unigene0041480;Unigene0044160;Unigene0044461;Unigene0044935;Unigene0045582;Unigene0045829;Unigene0047002;Unigene0047832;Unigene0048980;Unigene0049281	K15397+K01662+K12502+K00981+K01114+K00826+K19269+K00514+K00889+K03404+K00029+K00737+K01835+K01900+K00995+K00627+K00800+K00991+K03005+K00602+K01595
Carotenoid biosynthesis	1	38	0.190803	0.503731	ko00906	Unigene0017801	K00514
Plant-pathogen interaction	4	423	0.205574	0.503731	ko04626	Unigene0001077;Unigene0010412;Unigene0016008;Unigene0018401	K15397+K09422+K02358+K13414
SNARE interactions in vesicular transport	1	42	0.208684	0.503731	ko04130	Unigene0007531	K08490
Fatty acid elongation	1	45	0.221841	0.503731	ko00062	Unigene0001077	K15397
Citrate cycle (TCA cycle)	2	164	0.230349	0.503731	ko00020	Unigene0044461;Unigene0045582	K01900+K00627
Pantothenate and CoA biosynthesis	1	47	0.230493	0.503731	ko00770	Unigene0011131	K00826
Carbon fixation in photosynthetic organisms	2	170	0.242699	0.503731	ko00710	Unigene0035188;Unigene0049281	K00029+K01595
Thiamine metabolism	1	51	0.247517	0.503731	ko00730	Unigene0001132	K01662
Base excision repair	1	52	0.251715	0.503731	ko03410	Unigene0004965	K10801
Spliceosome	3	317	0.256337	0.503731	ko03040	Unigene0016855;Unigene0024939;Unigene0042914	K12896+K12836+K12826
N-Glycan biosynthesis	1	59	0.280466	0.503731	ko00510	Unigene0041480	K00737
Amino sugar and nucleotide sugar metabolism	2	193	0.290242	0.503731	ko00520	Unigene0001426;Unigene0044160	K13648+K01835
Ubiquinone and other terpenoid-quinone biosynthesis	1	62	0.292455	0.503731	ko00130	Unigene0004795	K12502
Phenylalanine, tyrosine and tryptophan biosynthesis	1	64	0.300339	0.503731	ko00400	Unigene0045829	K00800
Ubiquitin mediated proteolysis	2	201	0.306754	0.503731	ko04120	Unigene0021193;Unigene0038064	K10609+K10598
Carbon metabolism	5	670	0.312606	0.503731	ko01200	Unigene0013189;Unigene0035188;Unigene0044461;Unigene0045582;Unigene0049281	K19269+K00029+K01900+K00627+K01595
RNA polymerase	1	69	0.319675	0.503731	ko03020	Unigene0047832	K03005
Propanoate metabolism	1	74	0.338489	0.517689	ko00640	Unigene0044461	K01900
Galactose metabolism	1	87	0.385057	0.557483	ko00052	Unigene0044160	K01835
MAPK signaling pathway - plant	2	240	0.38595	0.557483	ko04016	Unigene0018401;Unigene0032040	K13414+K13422
Proteasome	1	95	0.412105	0.579174	ko03050	Unigene0028469	K03033
Nucleotide excision repair	1	99	0.425189	0.581838	ko03420	Unigene0021193	K10609
Plant hormone signal transduction	2	280	0.463173	0.605512	ko04075	Unigene0001097;Unigene0032040	K14489+K13422
2-Oxocarboxylic acid metabolism	1	112	0.465778	0.605512	ko01210	Unigene0011131	K00826
Valine, leucine and isoleucine degradation	1	117	0.480632	0.609582	ko00280	Unigene0011131	K00826
Glycolysis / Gluconeogenesis	2	317	0.52958	0.65567	ko00010	Unigene0044160;Unigene0045582	K01835+K00627
Pentose phosphate pathway	1	162	0.597371	0.69815	ko00030	Unigene0044160	K01835
Cysteine and methionine metabolism	1	162	0.597371	0.69815	ko00270	Unigene0011131	K00826
mRNA surveillance pathway	1	165	0.604168	0.69815	ko03015	Unigene0041034	K14416
Pyrimidine metabolism	1	176	0.628145	0.710077	ko00240	Unigene0047832	K03005
Starch and sucrose metabolism	1	195	0.666258	0.737136	ko00500	Unigene0044160	K01835
Glyoxylate and dicarboxylate metabolism	1	231	0.728287	0.788221	ko00630	Unigene0013189	K19269
Biosynthesis of amino acids	2	469	0.742746	0.788221	ko01230	Unigene0011131;Unigene0045829	K00826+K00800
Endocytosis	1	273	0.786501	0.817961	ko04144	Unigene0027210	K00889
RNA transport	1	313	0.830515	0.846799	ko03013	Unigene0017637	K14300
Protein processing in endoplasmic reticulum	1	411	0.904228	0.904228	ko04141	Unigene0028492	K09523

## Sheet: RB
KEGG analysis for 292 common single copy genes containing SSR sites in Chaenomeles japonica(RB)
Pathway	out (61)	All (6865)	Pvalue	Qvalue	Pathway ID	Genes	K_IDs
Ribosome biogenesis in eukaryotes	4	110	0.0161761	0.604162	ko03008	Unigene0010360;Unigene0025044;Unigene0035126;Unigene0047339	K14565+K14574+K14521+K11131
Thiamine metabolism	2	28	0.0253139	0.604162	ko00730	Unigene0001140;Unigene0009499	K01662+K14153
Pyruvate metabolism	4	155	0.0483693	0.604162	ko00620	Unigene0008233;Unigene0040661;Unigene0043490;Unigene0047276	K00029+K18881+K01595+K00627
SNARE interactions in vesicular transport	2	49	0.0699925	0.604162	ko04130	Unigene0019654;Unigene0046473	K08490+K08488
Ubiquinone and other terpenoid-quinone biosynthesis	2	58	0.0935809	0.604162	ko00130	Unigene0020571;Unigene0021277	K12502+K01904
Biosynthesis of secondary metabolites	18	1490	0.0948415	0.604162	ko01110	Unigene0000893;Unigene0001140;Unigene0007330;Unigene0008505;Unigene0011422;Unigene0019377;Unigene0020571;Unigene0021277;Unigene0023270;Unigene0030994;Unigene0031572;Unigene0032412;Unigene0038094;Unigene0041603;Unigene0041931;Unigene0044618;Unigene0046413;Unigene0047276	K00514+K01662+K19269+K00826+K00800+K03404+K12502+K01904+K01835+K08101+K00705+K00981+K00991+K15397+K00602+K01114+K01900+K00627
Glycerophospholipid metabolism	3	130	0.108408	0.604162	ko00564	Unigene0022800;Unigene0032412;Unigene0044618	K00995+K00981+K01114
Porphyrin and chlorophyll metabolism	2	64	0.110406	0.604162	ko00860	Unigene0019377;Unigene0030994	K03404+K08101
Terpenoid backbone biosynthesis	2	65	0.113285	0.604162	ko00900	Unigene0001140;Unigene0038094	K01662+K00991
Spliceosome	5	292	0.116549	0.604162	ko03040	Unigene0006102;Unigene0017320;Unigene0042126;Unigene0043305;Unigene0045363	K12896+K12826+K12875+K12835+K12836
Amino sugar and nucleotide sugar metabolism	3	149	0.145958	0.604162	ko00520	Unigene0023270;Unigene0042612;Unigene0047673	K01835+K13648+K13648
Carbon metabolism	6	403	0.146387	0.604162	ko01200	Unigene0007330;Unigene0008233;Unigene0043252;Unigene0043490;Unigene0046413;Unigene0047276	K19269+K00029+K18121+K01595+K01900+K00627
Glucosinolate biosynthesis	1	18	0.148586	0.604162	ko00966	Unigene0008505	K00826
Other types of O-glycan biosynthesis	1	19	0.156171	0.604162	ko00514	Unigene0028383	K09667
Citrate cycle (TCA cycle)	2	83	0.167934	0.604162	ko00020	Unigene0046413;Unigene0047276	K01900+K00627
Aminoacyl-tRNA biosynthesis	2	88	0.183845	0.604162	ko00970	Unigene0000481;Unigene0031136	K01889+K01873
Valine, leucine and isoleucine biosynthesis	1	25	0.200307	0.604162	ko00290	Unigene0008505	K00826
Arachidonic acid metabolism	1	25	0.200307	0.604162	ko00590	Unigene0039730	K15730
Butanoate metabolism	1	27	0.214507	0.604162	ko00650	Unigene0043252	K18121
One carbon pool by folate	1	28	0.221515	0.604162	ko00670	Unigene0041931	K00602
Inositol phosphate metabolism	2	100	0.222819	0.604162	ko00562	Unigene0040923;Unigene0044618	K00889+K01114
Phosphatidylinositol signaling system	2	102	0.22939	0.604162	ko04070	Unigene0032412;Unigene0040923	K00981+K00889
RNA transport	4	282	0.240854	0.604162	ko03013	Unigene0000686;Unigene0002387;Unigene0013954;Unigene0042126	K03252+K14300+K03262+K12875
Pantothenate and CoA biosynthesis	1	35	0.268873	0.604162	ko00770	Unigene0008505	K00826
Carbon fixation in photosynthetic organisms	2	115	0.272344	0.604162	ko00710	Unigene0008233;Unigene0043490	K00029+K01595
Carotenoid biosynthesis	1	38	0.28829	0.604162	ko00906	Unigene0000893	K00514
Metabolic pathways	26	2635	0.288331	0.604162	ko01100	Unigene0000893;Unigene0001140;Unigene0007330;Unigene0008233;Unigene0008505;Unigene0009499;Unigene0011422;Unigene0013974;Unigene0019377;Unigene0020571;Unigene0021277;Unigene0022800;Unigene0023270;Unigene0031572;Unigene0032412;Unigene0038094;Unigene0039730;Unigene0040923;Unigene0041603;Unigene0041931;Unigene0043252;Unigene0043490;Unigene0044553;Unigene0044618;Unigene0046413;Unigene0047276	K00514+K01662+K19269+K00029+K00826+K14153+K00800+K03005+K03404+K12502+K01904+K00995+K01835+K00705+K00981+K00991+K15730+K00889+K15397+K00602+K18121+K01595+K00737+K01114+K01900+K00627
Glyoxylate and dicarboxylate metabolism	2	120	0.288891	0.604162	ko00630	Unigene0007330;Unigene0043252	K19269+K18121
Ether lipid metabolism	1	40	0.300953	0.604162	ko00565	Unigene0044618	K01114
Nitrogen metabolism	1	41	0.307201	0.604162	ko00910	Unigene0044239	K01673
Purine metabolism	3	231	0.337795	0.624728	ko00230	Unigene0013974;Unigene0023270;Unigene0041931	K03005+K01835+K00602
Fatty acid elongation	1	47	0.343551	0.624728	ko00062	Unigene0041603	K15397
Propanoate metabolism	1	48	0.349424	0.624728	ko00640	Unigene0046413	K01900
N-Glycan biosynthesis	1	57	0.40001	0.652918	ko00510	Unigene0044553	K00737
Phenylalanine, tyrosine and tryptophan biosynthesis	1	61	0.421231	0.652918	ko00400	Unigene0011422	K00800
Base excision repair	1	66	0.446721	0.652918	ko03410	Unigene0019013	K10801
Galactose metabolism	1	69	0.461482	0.652918	ko00052	Unigene0023270	K01835
Proteasome	1	69	0.461482	0.652918	ko03050	Unigene0008131	K03033
Valine, leucine and isoleucine degradation	1	70	0.466316	0.652918	ko00280	Unigene0008505	K00826
Phenylalanine metabolism	1	71	0.471107	0.652918	ko00360	Unigene0021277	K01904
mRNA surveillance pathway	2	178	0.472423	0.652918	ko03015	Unigene0034409;Unigene0042126	K14416+K12875
Ubiquitin mediated proteolysis	2	178	0.472423	0.652918	ko04120	Unigene0001497;Unigene0024626	K10609+K10598
RNA polymerase	1	72	0.475855	0.652918	ko03020	Unigene0013974	K03005
Starch and sucrose metabolism	2	183	0.487024	0.653055	ko00500	Unigene0023270;Unigene0031572	K01835+K00705
MAPK signaling pathway - plant	2	193	0.515485	0.662787	ko04016	Unigene0022442;Unigene0028072	K13422+K13414
Pentose phosphate pathway	1	81	0.516749	0.662787	ko00030	Unigene0023270	K01835
Glycolysis / Gluconeogenesis	2	209	0.558866	0.688636	ko00010	Unigene0023270;Unigene0047276	K01835+K00627
2-Oxocarboxylic acid metabolism	1	93	0.566428	0.688636	ko01210	Unigene0008505	K00826
Plant-pathogen interaction	4	449	0.571918	0.688636	ko04626	Unigene0000260;Unigene0017881;Unigene0028072;Unigene0041603	K02358+K09422+K13414+K15397
Nucleotide excision repair	1	104	0.607533	0.716889	ko03420	Unigene0001497	K10609
Peroxisome	1	115	0.6448	0.745945	ko04146	Unigene0044051	K06664
Endocytosis	2	252	0.661703	0.750778	ko04144	Unigene0021971;Unigene0040923	K18466+K00889
Phagosome	1	129	0.687231	0.757025	ko04145	Unigene0046473	K08488
Cysteine and methionine metabolism	1	131	0.692871	0.757025	ko00270	Unigene0008505	K00826
Plant hormone signal transduction	2	298	0.749918	0.804458	ko04075	Unigene0022442;Unigene0037009	K13422+K14489
Phenylpropanoid biosynthesis	1	165	0.774772	0.812381	ko00940	Unigene0021277	K01904
Pyrimidine metabolism	1	170	0.784843	0.812381	ko00240	Unigene0013974	K03005
Biosynthesis of amino acids	2	367	0.8455	0.860077	ko01230	Unigene0008505;Unigene0011422	K00826+K00800
Protein processing in endoplasmic reticulum	1	359	0.96279	0.96279	ko04141	Unigene0041188	K09523

## Sheet: XZ
KEGG analysis for 292 common single copy genes containing SSR sites in Chaenomeles thibetica(XZ)
Pathway	out (60)	All (6300)	Pvalue	Qvalue	Pathway ID	Genes	K_IDs
Ribosome biogenesis in eukaryotes	4	100	0.014781	0.449525	ko03008	Unigene0011129;Unigene0011978;Unigene0038825;Unigene0042247	K14565+K11131+K14521+K14574
Pyruvate metabolism	4	106	0.0179553	0.449525	ko00620	Unigene0020707;Unigene0034613;Unigene0040674;Unigene0042498	K00029+K00627+K01595+K18881
Thiamine metabolism	2	25	0.0232513	0.449525	ko00730	Unigene0015530;Unigene0035960	K14153+K01662
Biosynthesis of secondary metabolites	18	1326	0.0647226	0.580117	ko01110	Unigene0003417;Unigene0003490;Unigene0008033;Unigene0011248;Unigene0014345;Unigene0017476;Unigene0020536;Unigene0026990;Unigene0028377;Unigene0033966;Unigene0034613;Unigene0035117;Unigene0035464;Unigene0035960;Unigene0036078;Unigene0037799;Unigene0038087;Unigene0041397	K01835+K01114+K00826+K12502+K08101+K19269+K00991+K00705+K00800+K15397+K00627+K01900+K00981+K01662+K00602+K01904+K03404+K00514
Glucosinolate biosynthesis	1	10	0.0913209	0.580117	ko00966	Unigene0008033	K00826
Terpenoid backbone biosynthesis	2	54	0.0931873	0.580117	ko00900	Unigene0020536;Unigene0035960	K00991+K01662
Ubiquinone and other terpenoid-quinone biosynthesis	2	55	0.0961313	0.580117	ko00130	Unigene0011248;Unigene0037799	K12502+K01904
Carbon metabolism	6	342	0.105242	0.580117	ko01200	Unigene0003287;Unigene0017476;Unigene0020707;Unigene0034613;Unigene0035117;Unigene0040674	K18121+K19269+K00029+K00627+K01900+K01595
Glycerophospholipid metabolism	3	123	0.111758	0.580117	ko00564	Unigene0003490;Unigene0022967;Unigene0035464	K01114+K00995+K00981
Porphyrin and chlorophyll metabolism	2	62	0.117445	0.580117	ko00860	Unigene0014345;Unigene0038087	K08101+K03404
Amino sugar and nucleotide sugar metabolism	3	135	0.137013	0.580117	ko00520	Unigene0003417;Unigene0018575;Unigene0037405	K01835+K13648+K13648
Valine, leucine and isoleucine biosynthesis	1	19	0.166466	0.580117	ko00290	Unigene0008033	K00826
Other types of O-glycan biosynthesis	1	19	0.166466	0.580117	ko00514	Unigene0039233	K09667
Arachidonic acid metabolism	1	20	0.174429	0.580117	ko00590	Unigene0013377	K15730
Aminoacyl-tRNA biosynthesis	2	80	0.176602	0.580117	ko00970	Unigene0011605;Unigene0034965	K01889+K01873
Spliceosome	5	317	0.182728	0.580117	ko03040	Unigene0001382;Unigene0012682;Unigene0014757;Unigene0036064;Unigene0039838	K12836+K12896+K12826+K12835+K12875
Butanoate metabolism	1	22	0.19013	0.580117	ko00650	Unigene0003287	K18121
Citrate cycle (TCA cycle)	2	84	0.190344	0.580117	ko00020	Unigene0034613;Unigene0035117	K00627+K01900
RNA transport	4	239	0.192203	0.580117	ko03013	Unigene0007019;Unigene0007089;Unigene0036707;Unigene0039838	K03262+K14300+K03252+K12875
Carbon fixation in photosynthetic organisms	2	92	0.21823	0.580117	ko00710	Unigene0020707;Unigene0040674	K00029+K01595
Glyoxylate and dicarboxylate metabolism	2	93	0.221745	0.580117	ko00630	Unigene0003287;Unigene0017476	K18121+K19269
Inositol phosphate metabolism	2	99	0.242924	0.580117	ko00562	Unigene0003490;Unigene0024289	K01114+K00889
Phosphatidylinositol signaling system	2	100	0.246465	0.580117	ko04070	Unigene0024289;Unigene0035464	K00889+K00981
One carbon pool by folate	1	30	0.250051	0.580117	ko00670	Unigene0036078	K00602
Nitrogen metabolism	1	30	0.250051	0.580117	ko00910	Unigene0027000	K01673
Metabolic pathways	26	2438	0.269863	0.582961	ko01100	Unigene0002712;Unigene0003287;Unigene0003417;Unigene0003490;Unigene0004728;Unigene0008033;Unigene0011248;Unigene0013377;Unigene0015530;Unigene0017476;Unigene0020536;Unigene0020707;Unigene0022967;Unigene0024289;Unigene0026990;Unigene0028377;Unigene0033966;Unigene0034613;Unigene0035117;Unigene0035464;Unigene0035960;Unigene0036078;Unigene0037799;Unigene0038087;Unigene0040674;Unigene0041397	K03005+K18121+K01835+K01114+K00737+K00826+K12502+K15730+K14153+K19269+K00991+K00029+K00995+K00889+K00705+K00800+K15397+K00627+K01900+K00981+K01662+K00602+K01904+K03404+K01595+K00514
Ether lipid metabolism	1	33	0.271378	0.582961	ko00565	Unigene0003490	K01114
Pantothenate and CoA biosynthesis	1	39	0.31226	0.624166	ko00770	Unigene0008033	K00826
Fatty acid elongation	1	40	0.318851	0.624166	ko00062	Unigene0033966	K15397
Carotenoid biosynthesis	1	41	0.325379	0.624166	ko00906	Unigene0041397	K00514
Purine metabolism	3	221	0.352226	0.624166	ko00230	Unigene0002712;Unigene0003417;Unigene0036078	K03005+K01835+K00602
Propanoate metabolism	1	46	0.35711	0.624166	ko00640	Unigene0035117	K01900
SNARE interactions in vesicular transport	1	48	0.369388	0.624166	ko04130	Unigene0021753	K08490
Base excision repair	1	51	0.387373	0.624166	ko03410	Unigene0006286	K10801
Phenylalanine, tyrosine and tryptophan biosynthesis	1	52	0.393255	0.624166	ko00400	Unigene0028377	K00800
N-Glycan biosynthesis	1	54	0.404853	0.624166	ko00510	Unigene0004728	K00737
Phenylalanine metabolism	1	56	0.416233	0.624166	ko00360	Unigene0037799	K01904
mRNA surveillance pathway	2	149	0.417102	0.624166	ko03015	Unigene0036593;Unigene0039838	K14416+K12875
Glycolysis / Gluconeogenesis	2	150	0.420427	0.624166	ko00010	Unigene0003417;Unigene0034613	K01835+K00627
Valine, leucine and isoleucine degradation	1	59	0.432903	0.624166	ko00280	Unigene0008033	K00826
Pentose phosphate pathway	1	67	0.475102	0.624166	ko00030	Unigene0003417	K01835
Proteasome	1	68	0.480155	0.624166	ko03050	Unigene0041917	K03033
Galactose metabolism	1	69	0.48516	0.624166	ko00052	Unigene0003417	K01835
RNA polymerase	1	70	0.490117	0.624166	ko03020	Unigene0002712	K03005
Ubiquitin mediated proteolysis	2	173	0.494129	0.624166	ko04120	Unigene0008450;Unigene0027712	K10609+K10598
2-Oxocarboxylic acid metabolism	1	71	0.495028	0.624166	ko01210	Unigene0008033	K00826
Starch and sucrose metabolism	2	178	0.509384	0.628601	ko00500	Unigene0003417;Unigene0026990	K01835+K00705
MAPK signaling pathway - plant	2	189	0.541904	0.6548	ko04016	Unigene0015126;Unigene0023192	K13422+K13414
Plant-pathogen interaction	4	413	0.560552	0.658366	ko04626	Unigene0006158;Unigene0017268;Unigene0023192;Unigene0033966	K02358+K09422+K13414+K15397
Nucleotide excision repair	1	87	0.567557	0.658366	ko03420	Unigene0008450	K10609
Peroxisome	1	105	0.636952	0.724376	ko04146	Unigene0033427	K06664
Cysteine and methionine metabolism	1	123	0.695366	0.775601	ko00270	Unigene0008033	K00826
Endocytosis	2	277	0.748259	0.81306	ko04144	Unigene0005284;Unigene0024289	K18466+K00889
Biosynthesis of amino acids	2	290	0.771006	0.81306	ko01230	Unigene0008033;Unigene0028377	K00826+K00800
Plant hormone signal transduction	2	290	0.771006	0.81306	ko04075	Unigene0015126;Unigene0037834	K13422+K14489
Pyrimidine metabolism	1	170	0.807784	0.831345	ko00240	Unigene0002712	K03005
Phenylpropanoid biosynthesis	1	175	0.817011	0.831345	ko00940	Unigene0037799	K01904
Protein processing in endoplasmic reticulum	1	390	0.978782	0.978782	ko04141	Unigene0012709	K09523

## Sheet: XZSS
KEGG analysis for 292 common single copy genes containing SSR sites in Chaenomeles thibetica (XZSS)
Pathway	out (60)	All (5807)	Pvalue	Qvalue	Pathway ID	Genes	K_IDs
Pyruvate metabolism	4	96	0.0168877	0.489742	ko00620	Unigene0010389;Unigene0016094;Unigene0028980;Unigene0034197	K00029+K00627+K18881+K01595
Ribosome biogenesis in eukaryotes	4	96	0.0168877	0.489742	ko03008	Unigene0003094;Unigene0006942;Unigene0031039;Unigene0032080	K14565+K14574+K11131+K14521
Thiamine metabolism	2	30	0.0379481	0.587519	ko00730	Unigene0001031;Unigene0039592	K01662+K14153
Biosynthesis of secondary metabolites	18	1211	0.0598848	0.587519	ko01110	Unigene0001031;Unigene0002365;Unigene0003988;Unigene0005993;Unigene0007323;Unigene0009421;Unigene0016094;Unigene0016187;Unigene0017220;Unigene0018225;Unigene0029571;Unigene0033002;Unigene0034795;Unigene0037906;Unigene0038017;Unigene0039156;Unigene0039280;Unigene0039670	K01662+K00514+K00705+K01114+K00800+K00602+K00627+K08101+K03404+K00826+K15397+K01900+K00991+K19269+K00981+K12502+K01904+K01835
Glucosinolate biosynthesis	1	6	0.06044	0.587519	ko00966	Unigene0018225	K00826
Ubiquinone and other terpenoid-quinone biosynthesis	2	50	0.0938428	0.587519	ko00130	Unigene0039156;Unigene0039280	K12502+K01904
Glycerophospholipid metabolism	3	110	0.104377	0.587519	ko00564	Unigene0005697;Unigene0005993;Unigene0038017	K00995+K01114+K00981
Terpenoid backbone biosynthesis	2	54	0.106838	0.587519	ko00900	Unigene0001031;Unigene0034795	K01662+K00991
Spliceosome	5	247	0.110447	0.587519	ko03040	Unigene0002897;Unigene0028114;Unigene0030113;Unigene0034370;Unigene0039601	K12896+K12836+K12875+K12835+K12826
Carbon metabolism	6	320	0.11094	0.587519	ko01200	Unigene0009389;Unigene0010389;Unigene0016094;Unigene0033002;Unigene0034197;Unigene0037906	K18121+K00029+K00627+K01900+K01595+K19269
Porphyrin and chlorophyll metabolism	2	56	0.113509	0.587519	ko00860	Unigene0016187;Unigene0017220	K08101+K03404
Amino sugar and nucleotide sugar metabolism	3	128	0.145475	0.587519	ko00520	Unigene0037289;Unigene0037886;Unigene0039670	K13648+K13648+K01835
Valine, leucine and isoleucine biosynthesis	1	16	0.153287	0.587519	ko00290	Unigene0018225	K00826
Other types of O-glycan biosynthesis	1	17	0.16206	0.587519	ko00514	Unigene0032953	K09667
Butanoate metabolism	1	19	0.179338	0.587519	ko00650	Unigene0009389	K18121
Citrate cycle (TCA cycle)	2	76	0.184974	0.587519	ko00020	Unigene0016094;Unigene0033002	K00627+K01900
Aminoacyl-tRNA biosynthesis	2	76	0.184974	0.587519	ko00970	Unigene0023268;Unigene0037591	K01873+K01889
Arachidonic acid metabolism	1	20	0.187845	0.587519	ko00590	Unigene0037504	K15730
Carbon fixation in photosynthetic organisms	2	78	0.192463	0.587519	ko00710	Unigene0010389;Unigene0034197	K00029+K01595
Inositol phosphate metabolism	2	84	0.215159	0.597417	ko00562	Unigene0005993;Unigene0032336	K01114+K00889
RNA transport	4	233	0.219531	0.597417	ko03013	Unigene0018141;Unigene0018837;Unigene0030113;Unigene0031060	K14300+K03262+K12875+K03252
Phosphatidylinositol signaling system	2	87	0.226607	0.597417	ko04070	Unigene0032336;Unigene0038017	K00889+K00981
One carbon pool by folate	1	26	0.237097	0.597897	ko00670	Unigene0009421	K00602
Ether lipid metabolism	1	30	0.268288	0.623813	ko00565	Unigene0005993	K01114
Glyoxylate and dicarboxylate metabolism	2	98	0.268885	0.623813	ko00630	Unigene0009389;Unigene0037906	K18121+K19269
Pantothenate and CoA biosynthesis	1	33	0.290854	0.634279	ko00770	Unigene0018225	K00826
Carotenoid biosynthesis	1	34	0.298223	0.634279	ko00906	Unigene0002365	K00514
Metabolic pathways	26	2294	0.314284	0.634279	ko01100	Unigene0001031;Unigene0002365;Unigene0003988;Unigene0005697;Unigene0005993;Unigene0007323;Unigene0007588;Unigene0009389;Unigene0009421;Unigene0010389;Unigene0016094;Unigene0017220;Unigene0018225;Unigene0029571;Unigene0032336;Unigene0033002;Unigene0034197;Unigene0034795;Unigene0036581;Unigene0037504;Unigene0037906;Unigene0038017;Unigene0039156;Unigene0039280;Unigene0039592;Unigene0039670	K01662+K00514+K00705+K00995+K01114+K00800+K03005+K18121+K00602+K00029+K00627+K03404+K00826+K15397+K00889+K01900+K01595+K00991+K00737+K15730+K19269+K00981+K12502+K01904+K14153+K01835
Nitrogen metabolism	1	39	0.333954	0.634279	ko00910	Unigene0038954	K01673
Propanoate metabolism	1	40	0.340882	0.634279	ko00640	Unigene0033002	K01900
Purine metabolism	3	202	0.34736	0.634279	ko00230	Unigene0007588;Unigene0009421;Unigene0039670	K03005+K00602+K01835
Fatty acid elongation	1	42	0.354527	0.634279	ko00062	Unigene0029571	K15397
SNARE interactions in vesicular transport	1	45	0.374475	0.634279	ko04130	Unigene0024994	K08490
Base excision repair	1	48	0.393816	0.634279	ko03410	Unigene0008020	K10801
Phenylalanine, tyrosine and tryptophan biosynthesis	1	50	0.406383	0.634279	ko00400	Unigene0007323	K00800
Phenylalanine metabolism	1	51	0.412569	0.634279	ko00360	Unigene0039280	K01904
Valine, leucine and isoleucine degradation	1	52	0.418693	0.634279	ko00280	Unigene0018225	K00826
N-Glycan biosynthesis	1	54	0.430752	0.634279	ko00510	Unigene0036581	K00737
Glycolysis / Gluconeogenesis	2	143	0.437434	0.634279	ko00010	Unigene0016094;Unigene0039670	K00627+K01835
mRNA surveillance pathway	2	143	0.437434	0.634279	ko03015	Unigene0027159;Unigene0030113	K14416+K12875
RNA polymerase	1	57	0.44838	0.634294	ko03020	Unigene0007588	K03005
Starch and sucrose metabolism	2	165	0.512511	0.665294	ko00500	Unigene0003988;Unigene0039670	K00705+K01835
Pentose phosphate pathway	1	69	0.513682	0.665294	ko00030	Unigene0039670	K01835
Proteasome	1	69	0.513682	0.665294	ko03050	Unigene0006378	K03033
2-Oxocarboxylic acid metabolism	1	71	0.5238	0.665294	ko01210	Unigene0018225	K00826
Galactose metabolism	1	74	0.538591	0.665294	ko00052	Unigene0039670	K01835
Ubiquitin mediated proteolysis	2	174	0.54134	0.665294	ko04120	Unigene0011171;Unigene0012486	K10609+K10598
Plant-pathogen interaction	4	376	0.550588	0.665294	ko04626	Unigene0014933;Unigene0017075;Unigene0018016;Unigene0029571	K02358+K13414+K09422+K15397
MAPK signaling pathway - plant	2	187	0.580918	0.687617	ko04016	Unigene0017075;Unigene0032045	K13414+K13422
Nucleotide excision repair	1	86	0.593366	0.688305	ko03420	Unigene0011171	K10609
Endocytosis	2	203	0.626205	0.712154	ko04144	Unigene0022711;Unigene0032336	K18466+K00889
Cysteine and methionine metabolism	1	112	0.691047	0.766816	ko00270	Unigene0018225	K00826
Peroxisome	1	115	0.700711	0.766816	ko04146	Unigene0033734	K06664
Pyrimidine metabolism	1	142	0.775331	0.807209	ko00240	Unigene0007588	K03005
Plant hormone signal transduction	2	273	0.781309	0.807209	ko04075	Unigene0000031;Unigene0032045	K14489+K13422
Phenylpropanoid biosynthesis	1	149	0.791476	0.807209	ko00940	Unigene0039280	K01904
Biosynthesis of amino acids	2	280	0.793292	0.807209	ko01230	Unigene0007323;Unigene0018225	K00800+K00826
Protein processing in endoplasmic reticulum	1	281	0.949793	0.949793	ko04141	Unigene0019551	K09523

## Sheet: ZPCA
KEGG analysis for 292 common single copy genes containing SSR sites in Chaenomeles speciosa(ZPCA)
Pathway	out (60)	All (7159)	Pvalue	Qvalue	Pathway ID	Genes	K_IDs
Ribosome biogenesis in eukaryotes	4	111	0.0137177	0.596682	ko03008	Unigene0014209;Unigene0020478;Unigene0038715;Unigene0043708	K14574+K11131+K14521+K14565
Thiamine metabolism	2	43	0.0500869	0.596682	ko00730	Unigene0008430;Unigene0033764	K01662+K14153
Porphyrin and chlorophyll metabolism	2	55	0.0773246	0.596682	ko00860	Unigene0025601;Unigene0046566	K03404+K08101
Pyruvate metabolism	4	193	0.0777697	0.596682	ko00620	Unigene0009008;Unigene0028317;Unigene0042872;Unigene0043483	K00029+K00627+K18881+K01595
Glycerophospholipid metabolism	3	120	0.0790093	0.596682	ko00564	Unigene0028744;Unigene0030706;Unigene0044477	K00995+K00981+K01114
Ubiquinone and other terpenoid-quinone biosynthesis	2	57	0.0822376	0.596682	ko00130	Unigene0031812;Unigene0043682	K01904+K12502
Terpenoid backbone biosynthesis	2	58	0.0847297	0.596682	ko00900	Unigene0008430;Unigene0027115	K01662+K00991
Glucosinolate biosynthesis	1	11	0.0884831	0.596682	ko00966	Unigene0024159	K00826
Spliceosome	5	288	0.0925886	0.596682	ko03040	Unigene0001341;Unigene0004972;Unigene0020839;Unigene0022978;Unigene0042472	K12875+K12826+K12835+K12836+K12896
Biosynthesis of secondary metabolites	18	1638	0.12368	0.640821	ko01110	Unigene0008430;Unigene0016026;Unigene0018284;Unigene0023134;Unigene0024159;Unigene0024349;Unigene0025601;Unigene0027115;Unigene0028317;Unigene0030706;Unigene0031426;Unigene0031812;Unigene0033310;Unigene0041437;Unigene0043682;Unigene0044344;Unigene0044477;Unigene0046566	K01662+K00514+K00705+K00800+K00826+K01835+K03404+K00991+K00627+K00981+K15397+K01904+K19269+K01900+K12502+K00602+K01114+K08101
Other types of O-glycan biosynthesis	1	19	0.147953	0.640821	ko00514	Unigene0042755	K09667
Amino sugar and nucleotide sugar metabolism	3	162	0.153948	0.640821	ko00520	Unigene0003755;Unigene0024349;Unigene0039501	K13648+K01835+K13648
Aminoacyl-tRNA biosynthesis	2	86	0.162023	0.640821	ko00970	Unigene0000365;Unigene0001398	K01873+K01889
Arachidonic acid metabolism	1	24	0.183166	0.640821	ko00590	Unigene0039749	K15730
Valine, leucine and isoleucine biosynthesis	1	26	0.196847	0.640821	ko00290	Unigene0024159	K00826
One carbon pool by folate	1	27	0.203603	0.640821	ko00670	Unigene0044344	K00602
RNA transport	4	291	0.226382	0.640821	ko03013	Unigene0001341;Unigene0016845;Unigene0028441;Unigene0039445	K12875+K03252+K14300+K03262
Phosphatidylinositol signaling system	2	108	0.228958	0.640821	ko04070	Unigene0026344;Unigene0030706	K00889+K00981
Carotenoid biosynthesis	1	32	0.236553	0.640821	ko00906	Unigene0016026	K00514
Inositol phosphate metabolism	2	112	0.241388	0.640821	ko00562	Unigene0026344;Unigene0044477	K00889+K01114
SNARE interactions in vesicular transport	1	38	0.274327	0.640821	ko04130	Unigene0024342	K08490
Purine metabolism	3	224	0.289437	0.640821	ko00230	Unigene0002141;Unigene0024349;Unigene0044344	K03005+K01835+K00602
Ether lipid metabolism	1	41	0.292518	0.640821	ko00565	Unigene0044477	K01114
Pantothenate and CoA biosynthesis	1	42	0.298482	0.640821	ko00770	Unigene0024159	K00826
Fatty acid elongation	1	43	0.304396	0.640821	ko00062	Unigene0031426	K15397
Carbon metabolism	6	554	0.318721	0.640821	ko01200	Unigene0009008;Unigene0028317;Unigene0033310;Unigene0041437;Unigene0043483;Unigene0044959	K00029+K00627+K19269+K01900+K01595+K18121
Carbon fixation in photosynthetic organisms	2	137	0.31929	0.640821	ko00710	Unigene0009008;Unigene0043483	K00029+K01595
Butanoate metabolism	1	47	0.327566	0.640821	ko00650	Unigene0044959	K18121
Metabolic pathways	26	2886	0.361734	0.640821	ko01100	Unigene0002141;Unigene0004337;Unigene0008430;Unigene0009008;Unigene0016026;Unigene0018284;Unigene0023134;Unigene0024159;Unigene0024349;Unigene0025601;Unigene0026344;Unigene0027115;Unigene0028317;Unigene0028744;Unigene0030706;Unigene0031426;Unigene0031812;Unigene0033310;Unigene0033764;Unigene0039749;Unigene0041437;Unigene0043483;Unigene0043682;Unigene0044344;Unigene0044477;Unigene0044959	K03005+K00737+K01662+K00029+K00514+K00705+K00800+K00826+K01835+K03404+K00889+K00991+K00627+K00995+K00981+K15397+K01904+K19269+K14153+K15730+K01900+K01595+K12502+K00602+K01114+K18121
Base excision repair	1	54	0.366302	0.640821	ko03410	Unigene0010267	K10801
N-Glycan biosynthesis	1	57	0.382223	0.640821	ko00510	Unigene0004337	K00737
Propanoate metabolism	1	57	0.382223	0.640821	ko00640	Unigene0041437	K01900
Citrate cycle (TCA cycle)	2	160	0.389444	0.640821	ko00020	Unigene0028317;Unigene0041437	K00627+K01900
Nitrogen metabolism	1	59	0.392618	0.640821	ko00910	Unigene0026212	K01673
Phenylalanine, tyrosine and tryptophan biosynthesis	1	60	0.397751	0.640821	ko00400	Unigene0023134	K00800
RNA polymerase	1	60	0.397751	0.640821	ko03020	Unigene0002141	K03005
mRNA surveillance pathway	2	172	0.424857	0.665993	ko03015	Unigene0001341;Unigene0041111	K12875+K14416
Ubiquitin mediated proteolysis	2	177	0.439312	0.670529	ko04120	Unigene0003240;Unigene0009935	K10609+K10598
Starch and sucrose metabolism	2	183	0.456404	0.670932	ko00500	Unigene0018284;Unigene0024349	K00705+K01835
Plant-pathogen interaction	4	419	0.469619	0.670932	ko04626	Unigene0002821;Unigene0017651;Unigene0031426;Unigene0032547	K02358+K09422+K15397+K13414
Galactose metabolism	1	79	0.487553	0.670932	ko00052	Unigene0024349	K01835
Phenylalanine metabolism	1	79	0.487553	0.670932	ko00360	Unigene0031812	K01904
Glyoxylate and dicarboxylate metabolism	2	199	0.500521	0.670932	ko00630	Unigene0033310;Unigene0044959	K19269+K18121
Proteasome	1	87	0.521298	0.670932	ko03050	Unigene0031364	K03033
Nucleotide excision repair	1	89	0.529387	0.670932	ko03420	Unigene0003240	K10609
MAPK signaling pathway - plant	2	211	0.532119	0.670932	ko04016	Unigene0007233;Unigene0032547	K13422+K13414
Valine, leucine and isoleucine degradation	1	96	0.556654	0.686935	ko00280	Unigene0024159	K00826
Pentose phosphate pathway	1	111	0.609958	0.737033	ko00030	Unigene0024349	K01835
2-Oxocarboxylic acid metabolism	1	122	0.644991	0.74515	ko01210	Unigene0024159	K00826
Glycolysis / Gluconeogenesis	2	260	0.646879	0.74515	ko00010	Unigene0024349;Unigene0028317	K01835+K00627
Endocytosis	2	264	0.655218	0.74515	ko04144	Unigene0021406;Unigene0026344	K18466+K00889
Plant hormone signal transduction	2	273	0.673422	0.751124	ko04075	Unigene0007233;Unigene0046068	K13422+K14489
Pyrimidine metabolism	1	145	0.708545	0.766363	ko00240	Unigene0002141	K03005
Cysteine and methionine metabolism	1	147	0.71351	0.766363	ko00270	Unigene0024159	K00826
Peroxisome	1	170	0.764964	0.806689	ko04146	Unigene0022521	K06664
Phenylpropanoid biosynthesis	1	180	0.784392	0.812406	ko00940	Unigene0031812	K01904
Biosynthesis of amino acids	2	420	0.87509	0.890443	ko01230	Unigene0023134;Unigene0024159	K00800+K00826
Protein processing in endoplasmic reticulum	1	350	0.951213	0.951213	ko04141	Unigene0025312	K09523

## Sheet: ZPLP
KEGG analysis for 292 common single copy genes containing SSR sites in Chaenomeles speciosa(ZPLP)
Pathway	out (60)	All (7126)	Pvalue	Qvalue	Pathway ID	Genes	K_IDs
Ribosome biogenesis in eukaryotes	4	111	0.0139308	0.6279	ko03008	Unigene0023947;Unigene0040684;Unigene0043464;Unigene0046260	K14565+K14521+K14574+K11131
Thiamine metabolism	2	41	0.0463491	0.6279	ko00730	Unigene0012226;Unigene0042003	K01662+K14153
Glycerophospholipid metabolism	3	105	0.0581545	0.6279	ko00564	Unigene0027676;Unigene0029547;Unigene0035785	K01114+K00995+K00981
Ubiquinone and other terpenoid-quinone biosynthesis	2	52	0.0707065	0.6279	ko00130	Unigene0009492;Unigene0046809	K12502+K01904
Pyruvate metabolism	4	192	0.077638	0.6279	ko00620	Unigene0005506;Unigene0040680;Unigene0040816;Unigene0041919	K00029+K00627+K18881+K01595
Glucosinolate biosynthesis	1	10	0.0811284	0.6279	ko00966	Unigene0043828	K00826
Terpenoid backbone biosynthesis	2	59	0.0879329	0.6279	ko00900	Unigene0012226;Unigene0038831	K01662+K00991
Porphyrin and chlorophyll metabolism	2	62	0.0956649	0.6279	ko00860	Unigene0010740;Unigene0027766	K03404+K08101
Spliceosome	5	306	0.113997	0.6279	ko03040	Unigene0002176;Unigene0012647;Unigene0012945;Unigene0025120;Unigene0042985	K12835+K12875+K12826+K12836+K12896
Biosynthesis of secondary metabolites	18	1632	0.12453	0.6279	ko01110	Unigene0009492;Unigene0010740;Unigene0012226;Unigene0022892;Unigene0027676;Unigene0027766;Unigene0033748;Unigene0034548;Unigene0035785;Unigene0038831;Unigene0039426;Unigene0039720;Unigene0040680;Unigene0040766;Unigene0042187;Unigene0043828;Unigene0044568;Unigene0046809	K12502+K03404+K01662+K01835+K01114+K08101+K19269+K01900+K00981+K00991+K00602+K15397+K00627+K00705+K00800+K00826+K00514+K01904
Amino sugar and nucleotide sugar metabolism	3	161	0.153437	0.6279	ko00520	Unigene0018318;Unigene0022892;Unigene0028743	K13648+K01835+K13648
Aminoacyl-tRNA biosynthesis	2	83	0.15432	0.6279	ko00970	Unigene0022784;Unigene0029687	K01873+K01889
Other types of O-glycan biosynthesis	1	20	0.155776	0.6279	ko00514	Unigene0044433	K09667
Arachidonic acid metabolism	1	23	0.176983	0.6279	ko00590	Unigene0007631	K15730
Ether lipid metabolism	1	24	0.183936	0.6279	ko00565	Unigene0027676	K01114
RNA transport	4	271	0.193433	0.6279	ko03013	Unigene0012647;Unigene0022934;Unigene0024985;Unigene0040734	K12875+K14300+K03252+K03262
Valine, leucine and isoleucine biosynthesis	1	26	0.197667	0.6279	ko00290	Unigene0043828	K00826
Inositol phosphate metabolism	2	98	0.199535	0.6279	ko00562	Unigene0027676;Unigene0029541	K01114+K00889
Phosphatidylinositol signaling system	2	100	0.205691	0.6279	ko04070	Unigene0029541;Unigene0035785	K00889+K00981
One carbon pool by folate	1	31	0.23101	0.636319	ko00670	Unigene0039426	K00602
Pantothenate and CoA biosynthesis	1	38	0.275411	0.636319	ko00770	Unigene0043828	K00826
Fatty acid elongation	1	40	0.287627	0.636319	ko00062	Unigene0039720	K15397
Purine metabolism	3	227	0.298777	0.636319	ko00230	Unigene0003667;Unigene0022892;Unigene0039426	K03005+K01835+K00602
Carotenoid biosynthesis	1	43	0.305573	0.636319	ko00906	Unigene0044568	K00514
SNARE interactions in vesicular transport	1	43	0.305573	0.636319	ko04130	Unigene0024850	K08490
Nitrogen metabolism	1	44	0.311455	0.636319	ko00910	Unigene0045962	K01673
Butanoate metabolism	1	46	0.323073	0.636319	ko00650	Unigene0044636	K18121
Carbon metabolism	6	571	0.348597	0.636319	ko01200	Unigene0005506;Unigene0033748;Unigene0034548;Unigene0040680;Unigene0041919;Unigene0044636	K00029+K19269+K01900+K00627+K01595+K18121
Carbon fixation in photosynthetic organisms	2	147	0.352177	0.636319	ko00710	Unigene0005506;Unigene0041919	K00029+K01595
Citrate cycle (TCA cycle)	2	149	0.35831	0.636319	ko00020	Unigene0034548;Unigene0040680	K01900+K00627
N-Glycan biosynthesis	1	54	0.36765	0.636319	ko00510	Unigene0003469	K00737
Base excision repair	1	54	0.36765	0.636319	ko03410	Unigene0005081	K10801
Metabolic pathways	26	2880	0.36788	0.636319	ko01100	Unigene0003469;Unigene0003667;Unigene0005506;Unigene0007631;Unigene0009492;Unigene0010740;Unigene0012226;Unigene0022892;Unigene0027676;Unigene0029541;Unigene0029547;Unigene0033748;Unigene0034548;Unigene0035785;Unigene0038831;Unigene0039426;Unigene0039720;Unigene0040680;Unigene0040766;Unigene0041919;Unigene0042003;Unigene0042187;Unigene0043828;Unigene0044568;Unigene0044636;Unigene0046809	K00737+K03005+K00029+K15730+K12502+K03404+K01662+K01835+K01114+K00889+K00995+K19269+K01900+K00981+K00991+K00602+K15397+K00627+K00705+K01595+K14153+K00800+K00826+K00514+K18121+K01904
Propanoate metabolism	1	55	0.373015	0.636319	ko00640	Unigene0034548	K01900
RNA polymerase	1	60	0.399175	0.647547	ko03020	Unigene0003667	K03005
Phenylalanine, tyrosine and tryptophan biosynthesis	1	62	0.409336	0.647547	ko00400	Unigene0042187	K00800
Starch and sucrose metabolism	2	171	0.424255	0.647547	ko00500	Unigene0022892;Unigene0040766	K01835+K00705
mRNA surveillance pathway	2	171	0.424255	0.647547	ko03015	Unigene0012647;Unigene0023108	K12875+K14416
Plant-pathogen interaction	4	405	0.446774	0.653871	ko04626	Unigene0011794;Unigene0020764;Unigene0032874;Unigene0039720	K02358+K09422+K13414+K15397
Ubiquitin mediated proteolysis	2	185	0.464443	0.653871	ko04120	Unigene0020367;Unigene0025047	K10609+K10598
Valine, leucine and isoleucine degradation	1	75	0.471384	0.653871	ko00280	Unigene0043828	K00826
Proteasome	1	77	0.480343	0.653871	ko03050	Unigene0020408	K03033
Phenylalanine metabolism	1	78	0.484766	0.653871	ko00360	Unigene0046809	K01904
Galactose metabolism	1	84	0.510539	0.672307	ko00052	Unigene0022892	K01835
Glyoxylate and dicarboxylate metabolism	2	206	0.521617	0.672307	ko00630	Unigene0033748;Unigene0044636	K19269+K18121
Nucleotide excision repair	1	95	0.554538	0.6992	ko03420	Unigene0020367	K10609
MAPK signaling pathway - plant	2	224	0.567374	0.700163	ko04016	Unigene0020878;Unigene0032874	K13422+K13414
2-Oxocarboxylic acid metabolism	1	109	0.604948	0.724761	ko01210	Unigene0043828	K00826
Endocytosis	2	248	0.62348	0.724761	ko04144	Unigene0023373;Unigene0029541	K18466+K00889
Pentose phosphate pathway	1	115	0.624794	0.724761	ko00030	Unigene0022892	K01835
Glycolysis / Gluconeogenesis	2	259	0.647304	0.736149	ko00010	Unigene0022892;Unigene0040680	K01835+K00627
Plant hormone signal transduction	2	271	0.67195	0.749483	ko04075	Unigene0000123;Unigene0020878	K14489+K13422
Cysteine and methionine metabolism	1	139	0.694833	0.760383	ko00270	Unigene0043828	K00826
Pyrimidine metabolism	1	156	0.736495	0.783783	ko00240	Unigene0003667	K03005
Peroxisome	1	159	0.743242	0.783783	ko04146	Unigene0027270	K06664
Phenylpropanoid biosynthesis	1	198	0.816928	0.846104	ko00940	Unigene0046809	K01904
Biosynthesis of amino acids	2	399	0.857459	0.872502	ko01230	Unigene0042187;Unigene0043828	K00800+K00826
Protein processing in endoplasmic reticulum	1	338	0.946499	0.946499	ko04141	Unigene0030066	K09523

## Sheet: ZPLY
KEGG analysis for 292 common single copy genes containing SSR sites in Chaenomeles speciosa(ZPLY)
Pathway	out (60)	All (6410)	Pvalue	Qvalue	Pathway ID	Genes	K_IDs
Pyruvate metabolism	4	105	0.0164339	0.435273	ko00620	Unigene0000557;Unigene0014918;Unigene0034145;Unigene0039870	K01595+K00029+K18881+K00627
Ribosome biogenesis in eukaryotes	4	106	0.0169613	0.435273	ko03008	Unigene0014806;Unigene0031805;Unigene0037056;Unigene0039444	K14574+K11131+K14521+K14565
Thiamine metabolism	2	25	0.0225141	0.435273	ko00730	Unigene0002970;Unigene0045823	K01662+K14153
Biosynthesis of secondary metabolites	18	1346	0.0635034	0.568467	ko01110	Unigene0001006;Unigene0002970;Unigene0005828;Unigene0009813;Unigene0010124;Unigene0011186;Unigene0012191;Unigene0020969;Unigene0022173;Unigene0023932;Unigene0030260;Unigene0031835;Unigene0038604;Unigene0039395;Unigene0039634;Unigene0039870;Unigene0039952;Unigene0040622	K01114+K01662+K19269+K01904+K08101+K00800+K12502+K03404+K00514+K00705+K00991+K00826+K00981+K01900+K01835+K00627+K15397+K00602
Ubiquinone and other terpenoid-quinone biosynthesis	2	51	0.082058	0.568467	ko00130	Unigene0009813;Unigene0012191	K01904+K12502
Carbon metabolism	6	330	0.0867531	0.568467	ko01200	Unigene0000557;Unigene0005828;Unigene0008293;Unigene0014918;Unigene0039395;Unigene0039870	K01595+K19269+K18121+K00029+K01900+K00627
Glucosinolate biosynthesis	1	11	0.0983512	0.568467	ko00966	Unigene0031835	K00826
Glycerophospholipid metabolism	3	122	0.105587	0.568467	ko00564	Unigene0001006;Unigene0008483;Unigene0038604	K01114+K00995+K00981
Porphyrin and chlorophyll metabolism	2	61	0.111104	0.568467	ko00860	Unigene0010124;Unigene0020969	K08101+K03404
Terpenoid backbone biosynthesis	2	61	0.111104	0.568467	ko00900	Unigene0002970;Unigene0030260	K01662+K00991
Spliceosome	5	284	0.125515	0.568467	ko03040	Unigene0021266;Unigene0033756;Unigene0041908;Unigene0045014;Unigene0045449	K12836+K12826+K12875+K12896+K12835
Citrate cycle (TCA cycle)	2	71	0.142384	0.568467	ko00020	Unigene0039395;Unigene0039870	K01900+K00627
Amino sugar and nucleotide sugar metabolism	3	141	0.144918	0.568467	ko00520	Unigene0000546;Unigene0036868;Unigene0039634	K13648+K13648+K01835
Valine, leucine and isoleucine biosynthesis	1	20	0.171692	0.568467	ko00290	Unigene0031835	K00826
Butanoate metabolism	1	20	0.171692	0.568467	ko00650	Unigene0008293	K18121
Aminoacyl-tRNA biosynthesis	2	80	0.171932	0.568467	ko00970	Unigene0001581;Unigene0038254	K01873+K01889
Arachidonic acid metabolism	1	22	0.187175	0.568467	ko00590	Unigene0033744	K15730
Other types of O-glycan biosynthesis	1	23	0.194809	0.568467	ko00514	Unigene0003056	K09667
Carbon fixation in photosynthetic organisms	2	87	0.195567	0.568467	ko00710	Unigene0000557;Unigene0014918	K01595+K00029
RNA transport	4	248	0.201514	0.568467	ko03013	Unigene0005376;Unigene0016359;Unigene0038602;Unigene0041908	K14300+K03252+K03262+K12875
Glyoxylate and dicarboxylate metabolism	2	90	0.205824	0.568467	ko00630	Unigene0005828;Unigene0008293	K19269+K18121
One carbon pool by folate	1	28	0.231937	0.598451	ko00670	Unigene0040622	K00602
Metabolic pathways	26	2471	0.261972	0.598451	ko01100	Unigene0000557;Unigene0001006;Unigene0002970;Unigene0004067;Unigene0004235;Unigene0005828;Unigene0008293;Unigene0008483;Unigene0009813;Unigene0011186;Unigene0012191;Unigene0014918;Unigene0020969;Unigene0022173;Unigene0023932;Unigene0030260;Unigene0031835;Unigene0033744;Unigene0038604;Unigene0039395;Unigene0039634;Unigene0039870;Unigene0039952;Unigene0040622;Unigene0043427;Unigene0045823	K01595+K01114+K01662+K00737+K03005+K19269+K18121+K00995+K01904+K00800+K12502+K00029+K03404+K00514+K00705+K00991+K00826+K15730+K00981+K01900+K01835+K00627+K15397+K00602+K00889+K14153
Nitrogen metabolism	1	33	0.26738	0.598451	ko00910	Unigene0036996	K01673
Inositol phosphate metabolism	2	108	0.268271	0.598451	ko00562	Unigene0001006;Unigene0043427	K01114+K00889
Phosphatidylinositol signaling system	2	108	0.268271	0.598451	ko04070	Unigene0038604;Unigene0043427	K00981+K00889
Ether lipid metabolism	1	38	0.301213	0.601566	ko00565	Unigene0001006	K01114
Pantothenate and CoA biosynthesis	1	39	0.307793	0.601566	ko00770	Unigene0031835	K00826
Fatty acid elongation	1	40	0.314312	0.601566	ko00062	Unigene0039952	K15397
Carotenoid biosynthesis	1	41	0.320771	0.601566	ko00906	Unigene0022173	K00514
Purine metabolism	3	213	0.321527	0.601566	ko00230	Unigene0004235;Unigene0039634;Unigene0040622	K03005+K01835+K00602
Base excision repair	1	46	0.352177	0.618978	ko03410	Unigene0008281	K10801
SNARE interactions in vesicular transport	1	46	0.352177	0.618978	ko04130	Unigene0028355	K08490
Propanoate metabolism	1	55	0.40515	0.6386	ko00640	Unigene0039395	K01900
Pentose phosphate pathway	1	57	0.416331	0.6386	ko00030	Unigene0039634	K01835
Phenylalanine, tyrosine and tryptophan biosynthesis	1	57	0.416331	0.6386	ko00400	Unigene0011186	K00800
N-Glycan biosynthesis	1	57	0.416331	0.6386	ko00510	Unigene0004067	K00737
Glycolysis / Gluconeogenesis	2	152	0.418393	0.6386	ko00010	Unigene0039634;Unigene0039870	K01835+K00627
Valine, leucine and isoleucine degradation	1	65	0.459022	0.649348	ko00280	Unigene0031835	K00826
Phenylalanine metabolism	1	65	0.459022	0.649348	ko00360	Unigene0009813	K01904
Proteasome	1	65	0.459022	0.649348	ko03050	Unigene0004745	K03033
mRNA surveillance pathway	2	171	0.478778	0.649681	ko03015	Unigene0041908;Unigene0046022	K12875+K14416
Galactose metabolism	1	70	0.484129	0.649681	ko00052	Unigene0039634	K01835
RNA polymerase	1	75	0.508089	0.649681	ko03020	Unigene0004235	K03005
Starch and sucrose metabolism	2	182	0.512011	0.649681	ko00500	Unigene0023932;Unigene0039634	K00705+K01835
Ubiquitin mediated proteolysis	2	186	0.523759	0.649681	ko04120	Unigene0003267;Unigene0041228	K10598+K10609
2-Oxocarboxylic acid metabolism	1	79	0.526466	0.649681	ko01210	Unigene0031835	K00826
MAPK signaling pathway - plant	2	196	0.552312	0.667377	ko04016	Unigene0031135;Unigene0038772	K13422+K13414
Plant-pathogen interaction	4	442	0.601541	0.712028	ko04626	Unigene0018925;Unigene0038772;Unigene0039952;Unigene0045896	K09422+K13414+K15397+K02358
Nucleotide excision repair	1	101	0.6161	0.714676	ko03420	Unigene0041228	K10609
Peroxisome	1	117	0.670589	0.747408	ko04146	Unigene0004376	K06664
Endocytosis	2	244	0.672598	0.747408	ko04144	Unigene0003590;Unigene0043427	K18466+K00889
Cysteine and methionine metabolism	1	121	0.682976	0.747408	ko00270	Unigene0031835	K00826
Plant hormone signal transduction	2	297	0.77416	0.814359	ko04075	Unigene0000854;Unigene0031135	K14489+K13422
Biosynthesis of amino acids	2	298	0.775787	0.814359	ko01230	Unigene0011186;Unigene0031835	K00800+K00826
Pyrimidine metabolism	1	162	0.786277	0.814359	ko00240	Unigene0004235	K03005
Phenylpropanoid biosynthesis	1	176	0.813311	0.82758	ko00940	Unigene0009813	K01904
Protein processing in endoplasmic reticulum	1	296	0.942164	0.942164	ko04141	Unigene0041229	K09523

## Sheet: ZPXC
KEGG analysis for 292 common single copy genes containing SSR sites in Chaenomeles speciosa(ZPXC)
Pathway	out (60)	All (7211)	Pvalue	Qvalue	Pathway ID	Genes	K_IDs
Porphyrin and chlorophyll metabolism	3	56	0.0111062	0.543148	ko00860	Unigene0012279;Unigene0014731;Unigene0027213	K08101+K01885+K03404
Aminoacyl-tRNA biosynthesis	3	70	0.0202104	0.543148	ko00970	Unigene0014731;Unigene0020170;Unigene0026303	K01885+K01873+K01889
Thiamine metabolism	2	40	0.0433881	0.543148	ko00730	Unigene0000731;Unigene0044415	K01662+K14153
Ribosome biogenesis in eukaryotes	3	102	0.0526674	0.543148	ko03008	Unigene0019825;Unigene0045553;Unigene0047108	K11131+K14521+K14565
Biosynthesis of secondary metabolites	19	1635	0.0685368	0.543148	ko01110	Unigene0000223;Unigene0000731;Unigene0008485;Unigene0009947;Unigene0012279;Unigene0014731;Unigene0024299;Unigene0026222;Unigene0027213;Unigene0028355;Unigene0028907;Unigene0032490;Unigene0040269;Unigene0041367;Unigene0042268;Unigene0043713;Unigene0045053;Unigene0046328;Unigene0047978	K12502+K01662+K00826+K00705+K08101+K01885+K00514+K01835+K03404+K01114+K00981+K19269+K01904+K00991+K00800+K00602+K00627+K01900+K15397
Glycerophospholipid metabolism	3	118	0.074688	0.543148	ko00564	Unigene0028355;Unigene0028907;Unigene0047518	K01114+K00981+K00995
Spliceosome	5	290	0.0924996	0.543148	ko03040	Unigene0007306;Unigene0021446;Unigene0024790;Unigene0030373;Unigene0030794	K12826+K12875+K12836+K12896+K12835
Ubiquinone and other terpenoid-quinone biosynthesis	2	62	0.0937711	0.543148	ko00130	Unigene0000223;Unigene0040269	K12502+K01904
Terpenoid backbone biosynthesis	2	62	0.0937711	0.543148	ko00900	Unigene0000731;Unigene0041367	K01662+K00991
Pyruvate metabolism	4	210	0.0966787	0.543148	ko00620	Unigene0000947;Unigene0001830;Unigene0042784;Unigene0045053	K00029+K18881+K01595+K00627
Glucosinolate biosynthesis	1	13	0.103011	0.543148	ko00966	Unigene0008485	K00826
Other types of O-glycan biosynthesis	1	19	0.146963	0.62673	ko00514	Unigene0023529	K09667
Amino sugar and nucleotide sugar metabolism	3	173	0.173816	0.62673	ko00520	Unigene0000056;Unigene0026222;Unigene0041956	K13648+K01835+K13648
Arachidonic acid metabolism	1	25	0.188796	0.62673	ko00590	Unigene0040465	K15730
Phosphatidylinositol signaling system	2	98	0.195994	0.62673	ko04070	Unigene0028907;Unigene0046367	K00981+K00889
Inositol phosphate metabolism	2	102	0.208156	0.62673	ko00562	Unigene0028355;Unigene0046367	K01114+K00889
Valine, leucine and isoleucine biosynthesis	1	29	0.215557	0.62673	ko00290	Unigene0008485	K00826
Ether lipid metabolism	1	29	0.215557	0.62673	ko00565	Unigene0028355	K01114
One carbon pool by folate	1	29	0.215557	0.62673	ko00670	Unigene0043713	K00602
RNA transport	4	293	0.226183	0.62673	ko03013	Unigene0005372;Unigene0020435;Unigene0021446;Unigene0041207	K14300+K03252+K12875+K03262
Pantothenate and CoA biosynthesis	1	32	0.235056	0.62673	ko00770	Unigene0008485	K00826
Carotenoid biosynthesis	1	37	0.266501	0.62673	ko00906	Unigene0024299	K00514
Metabolic pathways	27	2908	0.269747	0.62673	ko01100	Unigene0000223;Unigene0000731;Unigene0000947;Unigene0001570;Unigene0008485;Unigene0009947;Unigene0014731;Unigene0019999;Unigene0024299;Unigene0026222;Unigene0027213;Unigene0028355;Unigene0028907;Unigene0032490;Unigene0040269;Unigene0040465;Unigene0041367;Unigene0042268;Unigene0042784;Unigene0043713;Unigene0044415;Unigene0045053;Unigene0046328;Unigene0046367;Unigene0046729;Unigene0047518;Unigene00…	K12502+K01662+K00029+K03005+K00826+K00705+K01885+K18121+K00514+K01835+K03404+K01114+K00981+K19269+K01904+K15730+K00991+K00800+K01595+K00602+K14153+K00627+K01900+K00889+K00737+K00995+K15397
Butanoate metabolism	1	43	0.30256	0.62673	ko00650	Unigene0019999	K18121
Purine metabolism	3	232	0.304035	0.62673	ko00230	Unigene0001570;Unigene0026222;Unigene0043713	K03005+K01835+K00602
SNARE interactions in vesicular transport	1	44	0.308398	0.62673	ko04130	Unigene0017702	K08490
Fatty acid elongation	1	46	0.31993	0.62673	ko00062	Unigene0047978	K15397
Carbon metabolism	6	566	0.330717	0.62673	ko01200	Unigene0000947;Unigene0019999;Unigene0032490;Unigene0042784;Unigene0045053;Unigene0046328	K00029+K18121+K19269+K01595+K00627+K01900
Nitrogen metabolism	1	52	0.353403	0.62673	ko00910	Unigene0042395	K01673
Carbon fixation in photosynthetic organisms	2	151	0.358979	0.62673	ko00710	Unigene0000947;Unigene0042784	K00029+K01595
Citrate cycle (TCA cycle)	2	153	0.365018	0.62673	ko00020	Unigene0045053;Unigene0046328	K00627+K01900
N-Glycan biosynthesis	1	56	0.374814	0.62673	ko00510	Unigene0046729	K00737
mRNA surveillance pathway	2	160	0.385987	0.62673	ko03015	Unigene0021446;Unigene0034641	K12875+K14416
Phenylalanine, tyrosine and tryptophan biosynthesis	1	59	0.390412	0.62673	ko00400	Unigene0042268	K00800
Propanoate metabolism	1	61	0.400598	0.62673	ko00640	Unigene0046328	K01900
Base excision repair	1	61	0.400598	0.62673	ko03410	Unigene0002279	K10801
Plant-pathogen interaction	4	389	0.407243	0.62673	ko04626	Unigene0005874;Unigene0016440;Unigene0022096;Unigene0047978	K13414+K02358+K09422+K15397
RNA polymerase	1	63	0.410616	0.62673	ko03020	Unigene0001570	K03005
Starch and sucrose metabolism	2	174	0.427019	0.635054	ko00500	Unigene0009947;Unigene0026222	K00705+K01835
Ubiquitin mediated proteolysis	2	180	0.444184	0.644068	ko04120	Unigene0008725;Unigene0010221	K10598+K10609
Phenylalanine metabolism	1	81	0.493681	0.675668	ko00360	Unigene0040269	K01904
Galactose metabolism	1	84	0.506358	0.675668	ko00052	Unigene0026222	K01835
Proteasome	1	84	0.506358	0.675668	ko03050	Unigene0005549	K03033
Glyoxylate and dicarboxylate metabolism	2	205	0.512576	0.675668	ko00630	Unigene0019999;Unigene0032490	K18121+K19269
MAPK signaling pathway - plant	2	220	0.550962	0.696635	ko04016	Unigene0005874;Unigene0029333	K13414+K13422
Valine, leucine and isoleucine degradation	1	96	0.554017	0.696635	ko00280	Unigene0008485	K00826
2-Oxocarboxylic acid metabolism	1	104	0.583245	0.696635	ko01210	Unigene0008485	K00826
Endocytosis	2	236	0.58958	0.696635	ko04144	Unigene0022293;Unigene0046367	K18466+K00889
Pentose phosphate pathway	1	109	0.600548	0.696635	ko00030	Unigene0026222	K01835
Nucleotide excision repair	1	109	0.600548	0.696635	ko03420	Unigene0010221	K10609
Plant hormone signal transduction	2	267	0.657424	0.747658	ko04075	Unigene0018818;Unigene0029333	K14489+K13422
Glycolysis / Gluconeogenesis	2	282	0.686975	0.766242	ko00010	Unigene0026222;Unigene0045053	K01835+K00627
Cysteine and methionine metabolism	1	158	0.73679	0.800867	ko00270	Unigene0008485	K00826
Pyrimidine metabolism	1	162	0.745635	0.800867	ko00240	Unigene0001570	K03005
Peroxisome	1	173	0.768479	0.810396	ko04146	Unigene0041424	K06664
Phenylpropanoid biosynthesis	1	197	0.811546	0.84053	ko00940	Unigene0040269	K01904
Biosynthesis of amino acids	2	376	0.828165	0.842694	ko01230	Unigene0008485;Unigene0042268	K00826+K00800
Protein processing in endoplasmic reticulum	1	360	0.954304	0.954304	ko04141	Unigene0025589	K09523
