# Supplementary material for: Comparative transcriptomics provides a strategy for phylogenetic analysis and SSR marker development in Chaenomeles
Source: Sci Rep. 2021 Aug 12;11:16441. doi: 10.1038/s41598-021-95776-z (PMC8361139; doi:10.1038/s41598-021-95776-z)
Supplement: Supplementary file 12 — Supplementary Table S11. [file 41598_2021_95776_MOESM12_ESM.xlsx]

## Sheet: A
Candidate genes for primer design in 10 Chaenomeles germplams
GP	MY	MYXZ	RB	XZ	XZSS	ZPCA	ZPLP	ZPLY	ZPXC
ORTHOMCL4427	ORTHOMCL4397	ORTHOMCL4360	ORTHOMCL4427	ORTHOMCL4392	ORTHOMCL4480	ORTHOMCL4463	ORTHOMCL4636	ORTHOMCL4591	ORTHOMCL4472
ORTHOMCL4436	ORTHOMCL4424	ORTHOMCL4396	ORTHOMCL4918	ORTHOMCL4463	ORTHOMCL4663	ORTHOMCL4616	ORTHOMCL4463	ORTHOMCL4803	ORTHOMCL4510
ORTHOMCL4619	ORTHOMCL4360	ORTHOMCL4459	ORTHOMCL4999	ORTHOMCL4542	ORTHOMCL4713	ORTHOMCL4536	ORTHOMCL4510	ORTHOMCL4360	ORTHOMCL4589
ORTHOMCL4742	ORTHOMCL4722	ORTHOMCL4480	ORTHOMCL4927	ORTHOMCL4510	ORTHOMCL4735	ORTHOMCL4619	ORTHOMCL4927	ORTHOMCL4971	ORTHOMCL4642
ORTHOMCL4551	ORTHOMCL4515	ORTHOMCL4536	ORTHOMCL4885	ORTHOMCL4636	ORTHOMCL4806	ORTHOMCL4818	ORTHOMCL5090	ORTHOMCL5000	ORTHOMCL4463
ORTHOMCL4582	ORTHOMCL4536	ORTHOMCL4541	ORTHOMCL5093	ORTHOMCL4861	ORTHOMCL4466	ORTHOMCL4883	ORTHOMCL4806	ORTHOMCL4885	ORTHOMCL4737
ORTHOMCL4980	ORTHOMCL4510	ORTHOMCL4775	ORTHOMCL5137	ORTHOMCL4360	ORTHOMCL4636	ORTHOMCL4885	ORTHOMCL5310	ORTHOMCL4789	ORTHOMCL4360
ORTHOMCL4560	ORTHOMCL5365	ORTHOMCL4784	ORTHOMCL4572	ORTHOMCL4466	ORTHOMCL4536	ORTHOMCL4360	ORTHOMCL4466	ORTHOMCL4536	ORTHOMCL4796
ORTHOMCL4536	ORTHOMCL4591	ORTHOMCL5367	ORTHOMCL5227	ORTHOMCL5298	ORTHOMCL4510	ORTHOMCL4782	ORTHOMCL5427	ORTHOMCL5122	ORTHOMCL4798
ORTHOMCL5057	ORTHOMCL5466	ORTHOMCL4663	ORTHOMCL5262	ORTHOMCL4883	ORTHOMCL4472	ORTHOMCL4424	ORTHOMCL4360	ORTHOMCL5268	ORTHOMCL4885
ORTHOMCL5275	ORTHOMCL5490	ORTHOMCL4642	ORTHOMCL5304	ORTHOMCL4536	ORTHOMCL4463	ORTHOMCL4866	ORTHOMCL5418	ORTHOMCL5297	ORTHOMCL4536
ORTHOMCL4866	ORTHOMCL5572	ORTHOMCL5540	ORTHOMCL5309	ORTHOMCL4719	ORTHOMCL4424	ORTHOMCL4397	ORTHOMCL4480	ORTHOMCL5317	ORTHOMCL5248
ORTHOMCL4602	ORTHOMCL5589	ORTHOMCL4466	ORTHOMCL5330	ORTHOMCL4737	ORTHOMCL5538	ORTHOMCL4480	ORTHOMCL4719	ORTHOMCL5335	ORTHOMCL5185
ORTHOMCL4591	ORTHOMCL5611	ORTHOMCL5615	ORTHOMCL5350	ORTHOMCL4459	ORTHOMCL4866	ORTHOMCL5090	ORTHOMCL4591	ORTHOMCL5137	ORTHOMCL4789
ORTHOMCL4663	ORTHOMCL5718	ORTHOMCL5775	ORTHOMCL5381	ORTHOMCL4885	ORTHOMCL4541	ORTHOMCL4541	ORTHOMCL6053	ORTHOMCL5397	ORTHOMCL4806
ORTHOMCL4722	ORTHOMCL5792	ORTHOMCL5800	ORTHOMCL5382	ORTHOMCL5691	ORTHOMCL5997	ORTHOMCL4735	ORTHOMCL6095	ORTHOMCL4589	ORTHOMCL4424
ORTHOMCL4719	ORTHOMCL4643	ORTHOMCL5900	ORTHOMCL5388	ORTHOMCL5374	ORTHOMCL6093	ORTHOMCL5383	ORTHOMCL6262	ORTHOMCL5495	ORTHOMCL5418
ORTHOMCL5450	ORTHOMCL4663	ORTHOMCL5374	ORTHOMCL5418	ORTHOMCL5896	ORTHOMCL6145	ORTHOMCL4663	ORTHOMCL6280	ORTHOMCL4636	ORTHOMCL4866
ORTHOMCL5629	ORTHOMCL6614	ORTHOMCL6247	ORTHOMCL4722	ORTHOMCL5900	ORTHOMCL6339	ORTHOMCL4510	ORTHOMCL6366	ORTHOMCL5090	ORTHOMCL5298
ORTHOMCL5100	ORTHOMCL6798	ORTHOMCL6327	ORTHOMCL5477	ORTHOMCL5971	ORTHOMCL7246	ORTHOMCL4392	ORTHOMCL5383	ORTHOMCL4392	ORTHOMCL5538
ORTHOMCL5338	ORTHOMCL6804	ORTHOMCL6389	ORTHOMCL4541	ORTHOMCL5992	ORTHOMCL7300	ORTHOMCL5848	ORTHOMCL6690	ORTHOMCL6108	ORTHOMCL6002
ORTHOMCL5809	ORTHOMCL6706	ORTHOMCL5310	ORTHOMCL4510	ORTHOMCL5672	ORTHOMCL6035	ORTHOMCL5901	ORTHOMCL6946	ORTHOMCL5560	ORTHOMCL6027
ORTHOMCL5864	ORTHOMCL7168	ORTHOMCL6487	ORTHOMCL4392	ORTHOMCL6051	ORTHOMCL7384	ORTHOMCL6035	ORTHOMCL5317	ORTHOMCL5057	ORTHOMCL5962
ORTHOMCL5020	ORTHOMCL7244	ORTHOMCL6492	ORTHOMCL4636	ORTHOMCL6150	ORTHOMCL7470	ORTHOMCL6310	ORTHOMCL7230	ORTHOMCL6173	ORTHOMCL6668
ORTHOMCL6054	ORTHOMCL7396	ORTHOMCL6532	ORTHOMCL5672	ORTHOMCL5427	ORTHOMCL5020	ORTHOMCL6312	ORTHOMCL6505	ORTHOMCL5185	ORTHOMCL5072
ORTHOMCL6164	ORTHOMCL5072	ORTHOMCL4503	ORTHOMCL4883	ORTHOMCL6312	ORTHOMCL6606	ORTHOMCL6404	ORTHOMCL7208	ORTHOMCL4861	ORTHOMCL6948
ORTHOMCL6173	ORTHOMCL8079	ORTHOMCL6685	ORTHOMCL5783	ORTHOMCL6564	ORTHOMCL7781	ORTHOMCL6280	ORTHOMCL6606	ORTHOMCL6606	ORTHOMCL7064
ORTHOMCL6201	ORTHOMCL6280	ORTHOMCL6698	ORTHOMCL4536	ORTHOMCL6489	ORTHOMCL6739	ORTHOMCL6927	ORTHOMCL7514	ORTHOMCL6749	ORTHOMCL7294
ORTHOMCL6204	ORTHOMCL6093	ORTHOMCL6287	ORTHOMCL4587	ORTHOMCL4712	ORTHOMCL5120	ORTHOMCL7035	ORTHOMCL7424	ORTHOMCL5466	ORTHOMCL7168
ORTHOMCL6347	ORTHOMCL8505	ORTHOMCL7029	ORTHOMCL4619	ORTHOMCL6913	ORTHOMCL6927	ORTHOMCL6854	ORTHOMCL6164	ORTHOMCL5381	ORTHOMCL6404
ORTHOMCL4643	ORTHOMCL4713	ORTHOMCL7208	ORTHOMCL4496	ORTHOMCL6956	ORTHOMCL6002	ORTHOMCL7538	ORTHOMCL7944	ORTHOMCL7098	ORTHOMCL4616
ORTHOMCL6456	ORTHOMCL8476	ORTHOMCL7434	ORTHOMCL4983	ORTHOMCL6532	ORTHOMCL7396	ORTHOMCL7561	ORTHOMCL6564	ORTHOMCL6956	ORTHOMCL7736
ORTHOMCL6693	ORTHOMCL6262	ORTHOMCL7441	ORTHOMCL6454	ORTHOMCL7222	ORTHOMCL5719	ORTHOMCL6093	ORTHOMCL5374	ORTHOMCL7194	ORTHOMCL5718
ORTHOMCL6256	ORTHOMCL4676	ORTHOMCL7475	ORTHOMCL6461	ORTHOMCL7283	ORTHOMCL8505	ORTHOMCL5333	ORTHOMCL8026	ORTHOMCL6035	ORTHOMCL7781
ORTHOMCL6937	ORTHOMCL9020	ORTHOMCL7553	ORTHOMCL6489	ORTHOMCL7554	ORTHOMCL6164	ORTHOMCL4918	ORTHOMCL5072	ORTHOMCL7424	ORTHOMCL8033
ORTHOMCL6958	ORTHOMCL9058	ORTHOMCL7580	ORTHOMCL6505	ORTHOMCL6789	ORTHOMCL8058	ORTHOMCL7913	ORTHOMCL8276	ORTHOMCL7605	ORTHOMCL6532
ORTHOMCL7030	ORTHOMCL6913	ORTHOMCL7693	ORTHOMCL6325	ORTHOMCL7702	ORTHOMCL5495	ORTHOMCL8004	ORTHOMCL8079	ORTHOMCL8005	ORTHOMCL8092
ORTHOMCL7254	ORTHOMCL9146	ORTHOMCL5297	ORTHOMCL6706	ORTHOMCL4424	ORTHOMCL9320	ORTHOMCL8058	ORTHOMCL6108	ORTHOMCL8044	ORTHOMCL8123
ORTHOMCL5265	ORTHOMCL7300	ORTHOMCL7792	ORTHOMCL6739	ORTHOMCL5625	ORTHOMCL8573	ORTHOMCL4789	ORTHOMCL6002	ORTHOMCL4927	ORTHOMCL8278
ORTHOMCL7608	ORTHOMCL9110	ORTHOMCL7882	ORTHOMCL6215	ORTHOMCL8173	ORTHOMCL6532	ORTHOMCL8074	ORTHOMCL5297	ORTHOMCL8119	ORTHOMCL8425
ORTHOMCL7641	ORTHOMCL6002	ORTHOMCL5248	ORTHOMCL5023	ORTHOMCL5072	ORTHOMCL6937	ORTHOMCL8033	ORTHOMCL7434	ORTHOMCL5183	ORTHOMCL8476
ORTHOMCL4950	ORTHOMCL5374	ORTHOMCL8429	ORTHOMCL7466	ORTHOMCL7781	ORTHOMCL6310	ORTHOMCL8309	ORTHOMCL7590	ORTHOMCL8401	ORTHOMCL5427
ORTHOMCL6606	ORTHOMCL9043	ORTHOMCL7098	ORTHOMCL7515	ORTHOMCL8651	ORTHOMCL6698	ORTHOMCL8373	ORTHOMCL6739	ORTHOMCL5310	ORTHOMCL8743
ORTHOMCL6161	ORTHOMCL6164	ORTHOMCL8540	ORTHOMCL4971	ORTHOMCL7030	ORTHOMCL4643	ORTHOMCL5072	ORTHOMCL8092	ORTHOMCL8573	ORTHOMCL8749
ORTHOMCL7750	ORTHOMCL9245	ORTHOMCL8702	ORTHOMCL7011	ORTHOMCL7384	ORTHOMCL9669	ORTHOMCL4515	ORTHOMCL6145	ORTHOMCL7792	ORTHOMCL7511
ORTHOMCL8010	ORTHOMCL6366	ORTHOMCL8774	ORTHOMCL8008	ORTHOMCL6492	ORTHOMCL9476	ORTHOMCL5962	ORTHOMCL7030	ORTHOMCL8765	ORTHOMCL6145
ORTHOMCL6532	ORTHOMCL9690	ORTHOMCL7736	ORTHOMCL6854	ORTHOMCL5466	ORTHOMCL6150	ORTHOMCL8278	ORTHOMCL8998	ORTHOMCL8771	ORTHOMCL4713
ORTHOMCL8208	ORTHOMCL9580	ORTHOMCL8973	ORTHOMCL6535	ORTHOMCL9249	ORTHOMCL9771	ORTHOMCL6956	ORTHOMCL7194	ORTHOMCL8901	ORTHOMCL4643
ORTHOMCL8270	ORTHOMCL7736	ORTHOMCL7657	ORTHOMCL8112	ORTHOMCL8092	ORTHOMCL8079	ORTHOMCL7280	ORTHOMCL9232	ORTHOMCL4643	ORTHOMCL9453
ORTHOMCL7798	ORTHOMCL7030	ORTHOMCL9075	ORTHOMCL8196	ORTHOMCL9304	ORTHOMCL9304	ORTHOMCL5718	ORTHOMCL6181	ORTHOMCL9121	ORTHOMCL9508
ORTHOMCL8496	ORTHOMCL5538	ORTHOMCL4681	ORTHOMCL7424	ORTHOMCL9317	ORTHOMCL4396	ORTHOMCL7053	ORTHOMCL4589	ORTHOMCL8309	ORTHOMCL8774
ORTHOMCL8501	ORTHOMCL9798	ORTHOMCL5719	ORTHOMCL8358	ORTHOMCL8433	ORTHOMCL9915	ORTHOMCL5382	ORTHOMCL5538	ORTHOMCL9236	ORTHOMCL9552
ORTHOMCL6685	ORTHOMCL6287	ORTHOMCL8092	ORTHOMCL8405	ORTHOMCL6262	ORTHOMCL5718	ORTHOMCL6389	ORTHOMCL6035	ORTHOMCL6771	ORTHOMCL5023
ORTHOMCL8694	ORTHOMCL8702	ORTHOMCL9245	ORTHOMCL5321	ORTHOMCL4918	ORTHOMCL6492	ORTHOMCL4798	ORTHOMCL9374	ORTHOMCL4676	ORTHOMCL8505
ORTHOMCL7168	ORTHOMCL7278	ORTHOMCL8822	ORTHOMCL7470	ORTHOMCL4806	ORTHOMCL8208	ORTHOMCL9110	ORTHOMCL6278	ORTHOMCL9058	ORTHOMCL9605
ORTHOMCL6339	ORTHOMCL5495	ORTHOMCL9132	ORTHOMCL8636	ORTHOMCL6366	ORTHOMCL7736	ORTHOMCL4768	ORTHOMCL7736	ORTHOMCL9439	ORTHOMCL9110
ORTHOMCL6592	ORTHOMCL7384	ORTHOMCL9249	ORTHOMCL5540	ORTHOMCL7396	ORTHOMCL6027	ORTHOMCL7294	ORTHOMCL9605	ORTHOMCL9455	ORTHOMCL6489
ORTHOMCL4515	ORTHOMCL8973	ORTHOMCL9434	ORTHOMCL7029	ORTHOMCL7913	ORTHOMCL8278	ORTHOMCL6287	ORTHOMCL6126	ORTHOMCL8584	ORTHOMCL6150
ORTHOMCL7136	ORTHOMCL5310	ORTHOMCL7939	ORTHOMCL8785	ORTHOMCL8743	ORTHOMCL10159	ORTHOMCL6749	ORTHOMCL7384	ORTHOMCL7300	ORTHOMCL6749
ORTHOMCL6707	ORTHOMCL9476	ORTHOMCL5848	ORTHOMCL6389	ORTHOMCL8004	ORTHOMCL6051	ORTHOMCL9476	ORTHOMCL7569	ORTHOMCL8473	ORTHOMCL4883
ORTHOMCL7080	ORTHOMCL8694	ORTHOMCL8496	ORTHOMCL8309	ORTHOMCL7891	ORTHOMCL8477	ORTHOMCL8507	ORTHOMCL6454	ORTHOMCL7750	ORTHOMCL9923
ORTHOMCL7469	ORTHOMCL6914	ORTHOMCL9649	ORTHOMCL8917	ORTHOMCL9673	ORTHOMCL10184	ORTHOMCL7240	ORTHOMCL6389	ORTHOMCL6532	ORTHOMCL7944
ORTHOMCL9053	ORTHOMCL9304	ORTHOMCL6706	ORTHOMCL6204	ORTHOMCL6706	ORTHOMCL10212	ORTHOMCL5615	ORTHOMCL9834	ORTHOMCL9580	ORTHOMCL8373
ORTHOMCL6706	ORTHOMCL4534	ORTHOMCL9094	ORTHOMCL8373	ORTHOMCL9734	ORTHOMCL5321	ORTHOMCL9232	ORTHOMCL7781	ORTHOMCL7240	ORTHOMCL8044
ORTHOMCL4402	ORTHOMCL6489	ORTHOMCL6002	ORTHOMCL8901	ORTHOMCL9268	ORTHOMCL9121	ORTHOMCL5834	ORTHOMCL9612	ORTHOMCL5304	ORTHOMCL7252
ORTHOMCL9104	ORTHOMCL8208	ORTHOMCL8005	ORTHOMCL9054	ORTHOMCL9564	ORTHOMCL7702	ORTHOMCL5310	ORTHOMCL9901	ORTHOMCL6366	ORTHOMCL9915
ORTHOMCL6081	ORTHOMCL9662	ORTHOMCL9825	ORTHOMCL6771	ORTHOMCL8278	ORTHOMCL8496	ORTHOMCL9564	ORTHOMCL6287	ORTHOMCL6027	ORTHOMCL5466
ORTHOMCL8292	ORTHOMCL8257	ORTHOMCL10034	ORTHOMCL9124	ORTHOMCL8005	ORTHOMCL9946	ORTHOMCL6247	ORTHOMCL9947	ORTHOMCL9708	ORTHOMCL6789
ORTHOMCL7462	ORTHOMCL9605	ORTHOMCL8058	ORTHOMCL8461	ORTHOMCL8505	ORTHOMCL8074	ORTHOMCL5381	ORTHOMCL8208	ORTHOMCL9721	ORTHOMCL5992
ORTHOMCL7470	ORTHOMCL6327	ORTHOMCL5388	ORTHOMCL9268	ORTHOMCL10077	ORTHOMCL8092	ORTHOMCL9604	ORTHOMCL5718	ORTHOMCL7169	ORTHOMCL7515
ORTHOMCL9054	ORTHOMCL7475	ORTHOMCL8476	ORTHOMCL7832	ORTHOMCL6948	ORTHOMCL7561	ORTHOMCL9304	ORTHOMCL8967	ORTHOMCL7702	ORTHOMCL6339
ORTHOMCL6230	ORTHOMCL5335	ORTHOMCL5427	ORTHOMCL9341	ORTHOMCL5718	ORTHOMCL7294	ORTHOMCL5792	ORTHOMCL5900	ORTHOMCL7944	ORTHOMCL8058
ORTHOMCL9672	ORTHOMCL5450	ORTHOMCL7526	ORTHOMCL4979	ORTHOMCL8459	ORTHOMCL8026	ORTHOMCL9825	ORTHOMCL9813	ORTHOMCL4806	ORTHOMCL6914
ORTHOMCL5490	ORTHOMCL5992	ORTHOMCL8026	ORTHOMCL4616	ORTHOMCL5792	ORTHOMCL5427	ORTHOMCL7470	ORTHOMCL10153	ORTHOMCL9946	ORTHOMCL10153
ORTHOMCL7154	ORTHOMCL6749	ORTHOMCL9734	ORTHOMCL5427	ORTHOMCL7882	ORTHOMCL8473	ORTHOMCL6771	ORTHOMCL5796	ORTHOMCL8196	ORTHOMCL7035
ORTHOMCL9771	ORTHOMCL10388	ORTHOMCL8743	ORTHOMCL6027	ORTHOMCL9774	ORTHOMCL8476	ORTHOMCL6164	ORTHOMCL6749	ORTHOMCL6145	ORTHOMCL8461
ORTHOMCL9124	ORTHOMCL6035	ORTHOMCL10085	ORTHOMCL5020	ORTHOMCL7553	ORTHOMCL5137	ORTHOMCL7511	ORTHOMCL6310	ORTHOMCL8461	ORTHOMCL9219
ORTHOMCL9940	ORTHOMCL7913	ORTHOMCL7194	ORTHOMCL9525	ORTHOMCL8208	ORTHOMCL6535	ORTHOMCL10031	ORTHOMCL5248	ORTHOMCL7230	ORTHOMCL5792
ORTHOMCL9498	ORTHOMCL8074	ORTHOMCL7384	ORTHOMCL9058	ORTHOMCL5120	ORTHOMCL8123	ORTHOMCL5992	ORTHOMCL8774	ORTHOMCL7882	ORTHOMCL6614
ORTHOMCL4616	ORTHOMCL5137	ORTHOMCL8008	ORTHOMCL8651	ORTHOMCL6339	ORTHOMCL10415	ORTHOMCL8496	ORTHOMCL4971	ORTHOMCL6913	ORTHOMCL7995
ORTHOMCL5677	ORTHOMCL7808	ORTHOMCL5792	ORTHOMCL9642	ORTHOMCL5589	ORTHOMCL4360	ORTHOMCL10001	ORTHOMCL8278	ORTHOMCL7553	ORTHOMCL10368
ORTHOMCL10032	ORTHOMCL9439	ORTHOMCL6093	ORTHOMCL9703	ORTHOMCL4619	ORTHOMCL9703	ORTHOMCL8461	ORTHOMCL7300	ORTHOMCL5691	ORTHOMCL9690
ORTHOMCL7448	ORTHOMCL5775	ORTHOMCL10337	ORTHOMCL4424	ORTHOMCL9245	ORTHOMCL8044	ORTHOMCL5490	ORTHOMCL4642	ORTHOMCL8026	ORTHOMCL7553
ORTHOMCL10182	ORTHOMCL9721	ORTHOMCL5992	ORTHOMCL9439	ORTHOMCL9124	ORTHOMCL5992	ORTHOMCL10227	ORTHOMCL6913	ORTHOMCL8774	ORTHOMCL10430
ORTHOMCL8932	ORTHOMCL6247	ORTHOMCL10147	ORTHOMCL8425	ORTHOMCL6093	ORTHOMCL8785	ORTHOMCL9703	ORTHOMCL9122	ORTHOMCL9320	ORTHOMCL9172
ORTHOMCL9721	ORTHOMCL9771	ORTHOMCL6461	ORTHOMCL8429	ORTHOMCL7561	ORTHOMCL8196	ORTHOMCL8044	ORTHOMCL5304	ORTHOMCL7049	ORTHOMCL8865
ORTHOMCL7785	ORTHOMCL6108	ORTHOMCL6027	ORTHOMCL5589	ORTHOMCL4753	ORTHOMCL5000	ORTHOMCL8208	ORTHOMCL8358	ORTHOMCL9122	ORTHOMCL6004
ORTHOMCL10260	ORTHOMCL4982	ORTHOMCL9690	ORTHOMCL9923	ORTHOMCL6347	ORTHOMCL10430	ORTHOMCL6492	ORTHOMCL7283	ORTHOMCL8702	ORTHOMCL8079
ORTHOMCL4424	ORTHOMCL4463	ORTHOMCL4542	ORTHOMCL9944	ORTHOMCL4742	ORTHOMCL10570	ORTHOMCL7208	ORTHOMCL5388	ORTHOMCL6492	ORTHOMCL10337
ORTHOMCL6948	ORTHOMCL8743	ORTHOMCL10451	ORTHOMCL4643	ORTHOMCL4789	ORTHOMCL9721	ORTHOMCL10328	ORTHOMCL4918	ORTHOMCL8817	ORTHOMCL10147
ORTHOMCL10346	ORTHOMCL5672	ORTHOMCL5495	ORTHOMCL10025	ORTHOMCL9662	ORTHOMCL6327	ORTHOMCL6698	ORTHOMCL6027	ORTHOMCL9669	ORTHOMCL6698
ORTHOMCL7950	ORTHOMCL8461	ORTHOMCL6108	ORTHOMCL5834	ORTHOMCL5020	ORTHOMCL7434	ORTHOMCL5137	ORTHOMCL5495	ORTHOMCL9476	ORTHOMCL8694
ORTHOMCL7832	ORTHOMCL9673	ORTHOMCL5397	ORTHOMCL7208	ORTHOMCL10517	ORTHOMCL10368	ORTHOMCL8405	ORTHOMCL7240	ORTHOMCL5590	ORTHOMCL4712
ORTHOMCL7035	ORTHOMCL8420	ORTHOMCL8479	ORTHOMCL6913	ORTHOMCL7424	ORTHOMCL9947	ORTHOMCL7283	ORTHOMCL4735	ORTHOMCL7252	ORTHOMCL10540
ORTHOMCL5579	ORTHOMCL7944	ORTHOMCL7252	ORTHOMCL9178	ORTHOMCL6126	ORTHOMCL9564	ORTHOMCL8479	ORTHOMCL8584	ORTHOMCL9146	ORTHOMCL10458
ORTHOMCL6863	ORTHOMCL4789	ORTHOMCL6739	ORTHOMCL8079	ORTHOMCL6145	ORTHOMCL10388	ORTHOMCL10525	ORTHOMCL8496	ORTHOMCL5626	ORTHOMCL8585
ORTHOMCL7101	ORTHOMCL10430	ORTHOMCL7230	ORTHOMCL10147	ORTHOMCL6898	ORTHOMCL8584	ORTHOMCL6454	ORTHOMCL5848	ORTHOMCL10271	ORTHOMCL10656
ORTHOMCL9237	ORTHOMCL10184	ORTHOMCL9439	ORTHOMCL7240	ORTHOMCL9901	ORTHOMCL6685	ORTHOMCL7029	ORTHOMCL8479	ORTHOMCL4979	ORTHOMCL6492
ORTHOMCL5460	ORTHOMCL9374	ORTHOMCL9172	ORTHOMCL4818	ORTHOMCL8865	ORTHOMCL10663	ORTHOMCL7944	ORTHOMCL10346	ORTHOMCL10411	ORTHOMCL7590
ORTHOMCL7384	ORTHOMCL5800	ORTHOMCL8505	ORTHOMCL6693	ORTHOMCL8496	ORTHOMCL4918	ORTHOMCL8257	ORTHOMCL9848	ORTHOMCL7580	ORTHOMCL9525
ORTHOMCL8359	ORTHOMCL6312	ORTHOMCL8995	ORTHOMCL6492	ORTHOMCL6798	ORTHOMCL9245	ORTHOMCL5335	ORTHOMCL9110	ORTHOMCL4753	ORTHOMCL6247
ORTHOMCL5072	ORTHOMCL6150	ORTHOMCL9947	ORTHOMCL9900	ORTHOMCL7168	ORTHOMCL4753	ORTHOMCL5302	ORTHOMCL6247	ORTHOMCL9825	ORTHOMCL5589
ORTHOMCL6749	ORTHOMCL4712	ORTHOMCL10612	ORTHOMCL8208	ORTHOMCL6247	ORTHOMCL7230	ORTHOMCL7736	ORTHOMCL8694	ORTHOMCL8865	ORTHOMCL7300
ORTHOMCL4712	ORTHOMCL5304	ORTHOMCL10656	ORTHOMCL7975	ORTHOMCL8425	ORTHOMCL7252	ORTHOMCL8573	ORTHOMCL8257	ORTHOMCL8058	ORTHOMCL5388
ORTHOMCL5238	ORTHOMCL4480	ORTHOMCL9946	ORTHOMCL4463	ORTHOMCL10633	ORTHOMCL9491	ORTHOMCL9146	ORTHOMCL8069	ORTHOMCL6389	ORTHOMCL9662
ORTHOMCL9526	ORTHOMCL9913	ORTHOMCL5834	ORTHOMCL9288	ORTHOMCL10570	ORTHOMCL9232	ORTHOMCL7553	ORTHOMCL10625	ORTHOMCL6002	ORTHOMCL8771
ORTHOMCL9946	ORTHOMCL9669	ORTHOMCL5466	ORTHOMCL5374	ORTHOMCL10467	ORTHOMCL4397	ORTHOMCL6739	ORTHOMCL9564	ORTHOMCL10475	ORTHOMCL6690
ORTHOMCL8069	ORTHOMCL10747	ORTHOMCL9830	ORTHOMCL5298	ORTHOMCL9110	ORTHOMCL7283	ORTHOMCL9245	ORTHOMCL10525	ORTHOMCL9593	ORTHOMCL7441
ORTHOMCL10476	ORTHOMCL6339	ORTHOMCL5629	ORTHOMCL9834	ORTHOMCL9690	ORTHOMCL8008	ORTHOMCL9834	ORTHOMCL6956	ORTHOMCL10153	ORTHOMCL5332
ORTHOMCL5478	ORTHOMCL10656	ORTHOMCL6789	ORTHOMCL7300	ORTHOMCL6863	ORTHOMCL8479	ORTHOMCL4971	ORTHOMCL8771	ORTHOMCL8505	ORTHOMCL9834
ORTHOMCL9948	ORTHOMCL4983	ORTHOMCL7240	ORTHOMCL5120	ORTHOMCL9993	ORTHOMCL6366	ORTHOMCL8636	ORTHOMCL9245	ORTHOMCL9673	ORTHOMCL8507
ORTHOMCL6145	ORTHOMCL10147	ORTHOMCL9721	ORTHOMCL6914	ORTHOMCL8026	ORTHOMCL8405	ORTHOMCL10458	ORTHOMCL10368	ORTHOMCL9834	ORTHOMCL5809
ORTHOMCL8967	ORTHOMCL9657	ORTHOMCL4619	ORTHOMCL7792	ORTHOMCL10512	ORTHOMCL9830	ORTHOMCL6913	ORTHOMCL8573	ORTHOMCL10451	ORTHOMCL4918
ORTHOMCL6093	ORTHOMCL5321	ORTHOMCL4918	ORTHOMCL6031	ORTHOMCL9094	ORTHOMCL10738	ORTHOMCL5350	ORTHOMCL7169	ORTHOMCL4663	ORTHOMCL6164
ORTHOMCL6908	ORTHOMCL10458	ORTHOMCL6914	ORTHOMCL9915	ORTHOMCL6698	ORTHOMCL10746	ORTHOMCL6053	ORTHOMCL9146	ORTHOMCL9642	ORTHOMCL8433
ORTHOMCL8651	ORTHOMCL4782	ORTHOMCL9783	ORTHOMCL10388	ORTHOMCL6004	ORTHOMCL7244	ORTHOMCL10025	ORTHOMCL8700	ORTHOMCL9232	ORTHOMCL4572
ORTHOMCL9703	ORTHOMCL9232	ORTHOMCL9993	ORTHOMCL5715	ORTHOMCL9476	ORTHOMCL8901	ORTHOMCL7011	ORTHOMCL9104	ORTHOMCL5023	ORTHOMCL4453
ORTHOMCL10468	ORTHOMCL9434	ORTHOMCL5020	ORTHOMCL7699	ORTHOMCL6173	ORTHOMCL5901	ORTHOMCL8026	ORTHOMCL6327	ORTHOMCL10147	ORTHOMCL4619
ORTHOMCL5983	ORTHOMCL7554	ORTHOMCL9043	ORTHOMCL6333	ORTHOMCL8008	ORTHOMCL6706	ORTHOMCL9249	ORTHOMCL5490	ORTHOMCL7554	ORTHOMCL5297
ORTHOMCL7799	ORTHOMCL10077	ORTHOMCL8208	ORTHOMCL7561	ORTHOMCL6614	ORTHOMCL4742	ORTHOMCL8865	ORTHOMCL9124	ORTHOMCL7891	ORTHOMCL9947
ORTHOMCL7771	ORTHOMCL6347	ORTHOMCL10790	ORTHOMCL5456	ORTHOMCL9703	ORTHOMCL6948	ORTHOMCL8700	ORTHOMCL9703	ORTHOMCL8947	ORTHOMCL9993
ORTHOMCL9552	ORTHOMCL4742	ORTHOMCL9124	ORTHOMCL7098	ORTHOMCL6280	ORTHOMCL8765	ORTHOMCL10792	ORTHOMCL8196	ORTHOMCL10368	ORTHOMCL9232
ORTHOMCL6930	ORTHOMCL6863	ORTHOMCL7470	ORTHOMCL5792	ORTHOMCL8854	ORTHOMCL9453	ORTHOMCL10415	ORTHOMCL7098	ORTHOMCL5350	ORTHOMCL9146
ORTHOMCL8177	ORTHOMCL5901	ORTHOMCL4713	ORTHOMCL6164	ORTHOMCL6027	ORTHOMCL9612	ORTHOMCL10807	ORTHOMCL9075	ORTHOMCL9217	ORTHOMCL9657
ORTHOMCL6030	ORTHOMCL7678	ORTHOMCL8033	ORTHOMCL10594	ORTHOMCL5775	ORTHOMCL4803	ORTHOMCL8584	ORTHOMCL10388	ORTHOMCL5589	ORTHOMCL5397
ORTHOMCL5691	ORTHOMCL4918	ORTHOMCL9453	ORTHOMCL8278	ORTHOMCL9439	ORTHOMCL7278	ORTHOMCL8947	ORTHOMCL7168	ORTHOMCL7246	ORTHOMCL6093
ORTHOMCL6150	ORTHOMCL8585	ORTHOMCL6854	ORTHOMCL9734	ORTHOMCL9121	ORTHOMCL4676	ORTHOMCL7781	ORTHOMCL8585	ORTHOMCL7283	ORTHOMCL9304
ORTHOMCL6739	ORTHOMCL10262	ORTHOMCL10025	ORTHOMCL6698	ORTHOMCL9721	ORTHOMCL7222	ORTHOMCL9813	ORTHOMCL8005	ORTHOMCL5615	ORTHOMCL9946
ORTHOMCL10184	ORTHOMCL10337	ORTHOMCL10410	ORTHOMCL8092	ORTHOMCL8573	ORTHOMCL5691	ORTHOMCL5427	ORTHOMCL10501	ORTHOMCL5834	ORTHOMCL9672
ORTHOMCL8817	ORTHOMCL8309	ORTHOMCL8765	ORTHOMCL5000	ORTHOMCL4866	ORTHOMCL10337	ORTHOMCL5477	ORTHOMCL5615	ORTHOMCL6287	ORTHOMCL4541
ORTHOMCL8901	ORTHOMCL9503	ORTHOMCL5450	ORTHOMCL9605	ORTHOMCL10388	ORTHOMCL4619	ORTHOMCL4753	ORTHOMCL5962	ORTHOMCL8079	ORTHOMCL9286
ORTHOMCL8865	ORTHOMCL9923	ORTHOMCL6913	ORTHOMCL9383	ORTHOMCL7434	ORTHOMCL10776	ORTHOMCL6535	ORTHOMCL6948	ORTHOMCL6094	ORTHOMCL6347
ORTHOMCL4918	ORTHOMCL6171	ORTHOMCL6164	ORTHOMCL4642	ORTHOMCL8461	ORTHOMCL9734	ORTHOMCL5397	ORTHOMCL7553	ORTHOMCL8785	ORTHOMCL6327
ORTHOMCL4753	ORTHOMCL6173	ORTHOMCL9612	ORTHOMCL9947	ORTHOMCL5079	ORTHOMCL9146	ORTHOMCL6668	ORTHOMCL8476	ORTHOMCL7957	ORTHOMCL5057
ORTHOMCL5672	ORTHOMCL8044	ORTHOMCL6095	ORTHOMCL5900	ORTHOMCL6002	ORTHOMCL6489	ORTHOMCL5540	ORTHOMCL4541	ORTHOMCL7030	ORTHOMCL9094
ORTHOMCL10584	ORTHOMCL8196	ORTHOMCL8917	ORTHOMCL7441	ORTHOMCL8479	ORTHOMCL6312	ORTHOMCL6347	ORTHOMCL4753	ORTHOMCL8208	ORTHOMCL5615
ORTHOMCL8507	ORTHOMCL5848	ORTHOMCL7278	ORTHOMCL5397	ORTHOMCL8058	ORTHOMCL4712	ORTHOMCL5006	ORTHOMCL5589	ORTHOMCL6854	ORTHOMCL7808
ORTHOMCL6898	ORTHOMCL4753	ORTHOMCL5767	ORTHOMCL9294	ORTHOMCL7736	ORTHOMCL10517	ORTHOMCL9434	ORTHOMCL8854	ORTHOMCL8479	ORTHOMCL10562
ORTHOMCL7748	ORTHOMCL5456	ORTHOMCL10458	ORTHOMCL6451	ORTHOMCL9604	ORTHOMCL8585	ORTHOMCL10262	ORTHOMCL10337	ORTHOMCL7278	ORTHOMCL8208
ORTHOMCL10658	ORTHOMCL7702	ORTHOMCL4803	ORTHOMCL7590	ORTHOMCL4980	ORTHOMCL7263	ORTHOMCL10388	ORTHOMCL6150	ORTHOMCL10129	ORTHOMCL5350
ORTHOMCL8498	ORTHOMCL10410	ORTHOMCL4735	ORTHOMCL8700	ORTHOMCL5490	ORTHOMCL10879	ORTHOMCL9525	ORTHOMCL4643	ORTHOMCL5896	ORTHOMCL5304
ORTHOMCL10337	ORTHOMCL10898	ORTHOMCL8477	ORTHOMCL5333	ORTHOMCL5418	ORTHOMCL5023	ORTHOMCL6946	ORTHOMCL10409	ORTHOMCL10579	ORTHOMCL8440
ORTHOMCL8008	ORTHOMCL9268	ORTHOMCL4470	ORTHOMCL8771	ORTHOMCL4663	ORTHOMCL4796	ORTHOMCL10720	ORTHOMCL10879	ORTHOMCL10056	ORTHOMCL8917
ORTHOMCL7675	ORTHOMCL7882	ORTHOMCL10501	ORTHOMCL9476	ORTHOMCL9672	ORTHOMCL7171	ORTHOMCL9830	ORTHOMCL10411	ORTHOMCL9434	ORTHOMCL5672
ORTHOMCL7899	ORTHOMCL7390	ORTHOMCL9605	ORTHOMCL8514	ORTHOMCL10346	ORTHOMCL5048	ORTHOMCL9690	ORTHOMCL6685	ORTHOMCL7035	ORTHOMCL10879
ORTHOMCL8771	ORTHOMCL8479	ORTHOMCL5971	ORTHOMCL8765	ORTHOMCL7280	ORTHOMCL5248	ORTHOMCL8917	ORTHOMCL5611	ORTHOMCL9913	ORTHOMCL9075
ORTHOMCL9219	ORTHOMCL8026	ORTHOMCL9673	ORTHOMCL10034	ORTHOMCL5450	ORTHOMCL9122	ORTHOMCL9657	ORTHOMCL5450	ORTHOMCL8092	ORTHOMCL8479
ORTHOMCL7156	ORTHOMCL10159	ORTHOMCL4589	ORTHOMCL5959	ORTHOMCL9537	ORTHOMCL5572	ORTHOMCL10790	ORTHOMCL5023	ORTHOMCL7168	ORTHOMCL8196
ORTHOMCL9336	ORTHOMCL9946	ORTHOMCL9146	ORTHOMCL9669	ORTHOMCL10337	ORTHOMCL9690	ORTHOMCL9642	ORTHOMCL7475	ORTHOMCL4883	ORTHOMCL7384
ORTHOMCL6202	ORTHOMCL4803	ORTHOMCL6312	ORTHOMCL6287	ORTHOMCL10747	ORTHOMCL8694	ORTHOMCL8476	ORTHOMCL5691	ORTHOMCL7693	ORTHOMCL5629
ORTHOMCL6280	ORTHOMCL6004	ORTHOMCL5023	ORTHOMCL5691	ORTHOMCL4796	ORTHOMCL7424	ORTHOMCL10572	ORTHOMCL9830	ORTHOMCL8276	ORTHOMCL5848
ORTHOMCL10898	ORTHOMCL9124	ORTHOMCL10879	ORTHOMCL9564	ORTHOMCL5335	ORTHOMCL10034	ORTHOMCL6690	ORTHOMCL10034	ORTHOMCL4619	ORTHOMCL5611
ORTHOMCL4885	ORTHOMCL5427	ORTHOMCL10227	ORTHOMCL9110	ORTHOMCL9915	ORTHOMCL10451	ORTHOMCL4719	ORTHOMCL10124	ORTHOMCL7515	ORTHOMCL6333
ORTHOMCL8079	ORTHOMCL10126	ORTHOMCL10262	ORTHOMCL5383	ORTHOMCL5262	ORTHOMCL9094	ORTHOMCL6327	ORTHOMCL9094	ORTHOMCL10458	ORTHOMCL9249
ORTHOMCL5388	ORTHOMCL6698	ORTHOMCL10917	ORTHOMCL6749	ORTHOMCL9146	ORTHOMCL7882	ORTHOMCL5304	ORTHOMCL8947	ORTHOMCL7390	ORTHOMCL9612
ORTHOMCL8026	ORTHOMCL8092	ORTHOMCL10077	ORTHOMCL5786	ORTHOMCL6164	ORTHOMCL5478	ORTHOMCL7441	ORTHOMCL8173	ORTHOMCL10856	ORTHOMCL7169
ORTHOMCL6031	ORTHOMCL10411	ORTHOMCL5626	ORTHOMCL7113	ORTHOMCL9020	ORTHOMCL8774	ORTHOMCL10153	ORTHOMCL8386	ORTHOMCL5314	ORTHOMCL6287
ORTHOMCL5298	ORTHOMCL6204	ORTHOMCL5335	ORTHOMCL7252	ORTHOMCL9374	ORTHOMCL10153	ORTHOMCL5100	ORTHOMCL4798	ORTHOMCL4796	ORTHOMCL8386
ORTHOMCL5079	ORTHOMCL9552	ORTHOMCL4737	ORTHOMCL10409	ORTHOMCL9552	ORTHOMCL7693	ORTHOMCL10746	ORTHOMCL10579	ORTHOMCL10525	ORTHOMCL6428
ORTHOMCL10475	ORTHOMCL5796	ORTHOMCL5381	ORTHOMCL10835	ORTHOMCL10917	ORTHOMCL5057	ORTHOMCL5896	ORTHOMCL10105	ORTHOMCL6215	ORTHOMCL8004
ORTHOMCL6171	ORTHOMCL5079	ORTHOMCL10260	ORTHOMCL4737	ORTHOMCL7171	ORTHOMCL10346	ORTHOMCL9268	ORTHOMCL4619	ORTHOMCL6093	ORTHOMCL5283
ORTHOMCL10227	ORTHOMCL4589	ORTHOMCL8771	ORTHOMCL9662	ORTHOMCL9612	ORTHOMCL8636	ORTHOMCL7169	ORTHOMCL7798	ORTHOMCL8585	ORTHOMCL4436
ORTHOMCL8479	ORTHOMCL10594	ORTHOMCL9268	ORTHOMCL8479	ORTHOMCL5540	ORTHOMCL6956	ORTHOMCL10411	ORTHOMCL5992	ORTHOMCL5611	ORTHOMCL7246
ORTHOMCL7882	ORTHOMCL10570	ORTHOMCL5304	ORTHOMCL10333	ORTHOMCL9669	ORTHOMCL5611	ORTHOMCL4642	ORTHOMCL9236	ORTHOMCL9564	ORTHOMCL8473
ORTHOMCL4860	ORTHOMCL7194	ORTHOMCL10525	ORTHOMCL9320	ORTHOMCL8473	ORTHOMCL4818	ORTHOMCL9552	ORTHOMCL4396	ORTHOMCL4541	ORTHOMCL8358
ORTHOMCL10153	ORTHOMCL9915	ORTHOMCL4463	ORTHOMCL8440	ORTHOMCL8033	ORTHOMCL10898	ORTHOMCL8477	ORTHOMCL6698	ORTHOMCL9075	ORTHOMCL10501
ORTHOMCL8405	ORTHOMCL4572	ORTHOMCL5137	ORTHOMCL9875	ORTHOMCL6937	ORTHOMCL7390	ORTHOMCL7798	ORTHOMCL5120	ORTHOMCL8405	ORTHOMCL10747
ORTHOMCL5769	ORTHOMCL7434	ORTHOMCL9491	ORTHOMCL9245	ORTHOMCL9122	ORTHOMCL6204	ORTHOMCL5374	ORTHOMCL9690	ORTHOMCL6327	ORTHOMCL6913
ORTHOMCL7736	ORTHOMCL6739	ORTHOMCL10747	ORTHOMCL8496	ORTHOMCL6333	ORTHOMCL10747	ORTHOMCL8771	ORTHOMCL8749	ORTHOMCL9249	ORTHOMCL10625
ORTHOMCL6505	ORTHOMCL10956	ORTHOMCL7702	ORTHOMCL6804	ORTHOMCL9453	ORTHOMCL10025	ORTHOMCL8552	ORTHOMCL5901	ORTHOMCL8033	ORTHOMCL7280
ORTHOMCL9560	ORTHOMCL6492	ORTHOMCL8585	ORTHOMCL6532	ORTHOMCL4616	ORTHOMCL9434	ORTHOMCL10517	ORTHOMCL4789	ORTHOMCL10705	ORTHOMCL5262
ORTHOMCL5792	ORTHOMCL6948	ORTHOMCL9669	ORTHOMCL6093	ORTHOMCL10147	ORTHOMCL6505	ORTHOMCL10973	ORTHOMCL7294	ORTHOMCL9612	ORTHOMCL5901
ORTHOMCL5048	ORTHOMCL10227	ORTHOMCL6898	ORTHOMCL9410	ORTHOMCL5786	ORTHOMCL7944	ORTHOMCL6789	ORTHOMCL7693	ORTHOMCL9525	ORTHOMCL5896
ORTHOMCL10656	ORTHOMCL5397	ORTHOMCL5478	ORTHOMCL5297	ORTHOMCL5719	ORTHOMCL10126	ORTHOMCL10467	ORTHOMCL5350	ORTHOMCL10346	ORTHOMCL10328
ORTHOMCL7434	ORTHOMCL9825	ORTHOMCL5896	ORTHOMCL6035	ORTHOMCL9434	ORTHOMCL10917	ORTHOMCL10316	ORTHOMCL10328	ORTHOMCL7384	ORTHOMCL7263
ORTHOMCL6979	ORTHOMCL6505	ORTHOMCL6863	ORTHOMCL5962	ORTHOMCL4927	ORTHOMCL10458	ORTHOMCL5275	ORTHOMCL9491	ORTHOMCL5321	ORTHOMCL10001
ORTHOMCL7252	ORTHOMCL5900	ORTHOMCL10929	ORTHOMCL7511	ORTHOMCL5275	ORTHOMCL10501	ORTHOMCL7384	ORTHOMCL8044	ORTHOMCL10031	ORTHOMCL10929
ORTHOMCL9657	ORTHOMCL5767	ORTHOMCL5382	ORTHOMCL9317	ORTHOMCL8095	ORTHOMCL9708	ORTHOMCL9673	ORTHOMCL5896	ORTHOMCL7475	ORTHOMCL10517
ORTHOMCL8196	ORTHOMCL10467	ORTHOMCL6347	ORTHOMCL7702	ORTHOMCL10415	ORTHOMCL9249	ORTHOMCL6863	ORTHOMCL7263	ORTHOMCL10955	ORTHOMCL4735
ORTHOMCL9673	ORTHOMCL8058	ORTHOMCL7222	ORTHOMCL8817	ORTHOMCL10525	ORTHOMCL9913	ORTHOMCL5783	ORTHOMCL6863	ORTHOMCL6698	ORTHOMCL10126
ORTHOMCL9434	ORTHOMCL6051	ORTHOMCL10969	ORTHOMCL8584	ORTHOMCL10126	ORTHOMCL9673	ORTHOMCL5611	ORTHOMCL7278	ORTHOMCL4980	ORTHOMCL8173
ORTHOMCL6051	ORTHOMCL10025	ORTHOMCL4971	ORTHOMCL6042	ORTHOMCL7693	ORTHOMCL9825	ORTHOMCL9320	ORTHOMCL8058	ORTHOMCL9657	ORTHOMCL5090
ORTHOMCL9816	ORTHOMCL7252	ORTHOMCL5589	ORTHOMCL10451	ORTHOMCL4982	ORTHOMCL5900	ORTHOMCL7278	ORTHOMCL8461	ORTHOMCL8107	ORTHOMCL9954
ORTHOMCL10353	ORTHOMCL10346	ORTHOMCL7390	ORTHOMCL7053	ORTHOMCL9947	ORTHOMCL8425	ORTHOMCL9721	ORTHOMCL10540	ORTHOMCL4712	ORTHOMCL10410
ORTHOMCL7553	ORTHOMCL10451	ORTHOMCL5298	ORTHOMCL7944	ORTHOMCL6911	ORTHOMCL5971	ORTHOMCL5767	ORTHOMCL10663	ORTHOMCL4480	ORTHOMCL6898
ORTHOMCL6095	ORTHOMCL6389	ORTHOMCL7511	ORTHOMCL10813	ORTHOMCL6054	ORTHOMCL8700	ORTHOMCL10917	ORTHOMCL7246	ORTHOMCL9456	ORTHOMCL4982
ORTHOMCL4664	ORTHOMCL7470	ORTHOMCL9923	ORTHOMCL10430	ORTHOMCL5023	ORTHOMCL10467	ORTHOMCL4713	ORTHOMCL8373	ORTHOMCL8694	ORTHOMCL9124
ORTHOMCL10458	ORTHOMCL8005	ORTHOMCL10625	ORTHOMCL4360	ORTHOMCL10328	ORTHOMCL10105	ORTHOMCL4712	ORTHOMCL6312	ORTHOMCL10956	ORTHOMCL6854
ORTHOMCL10956	ORTHOMCL8771	ORTHOMCL4616	ORTHOMCL9612	ORTHOMCL8694	ORTHOMCL6247	ORTHOMCL6126	ORTHOMCL9434	ORTHOMCL8700	ORTHOMCL10077
ORTHOMCL10936	ORTHOMCL9901	ORTHOMCL4885	ORTHOMCL7384	ORTHOMCL6606	ORTHOMCL9662	ORTHOMCL4589	ORTHOMCL5365	ORTHOMCL7011	ORTHOMCL8405
ORTHOMCL6333	ORTHOMCL10694	ORTHOMCL9236	ORTHOMCL5745	ORTHOMCL10031	ORTHOMCL7515	ORTHOMCL10501	ORTHOMCL5000	ORTHOMCL6347	ORTHOMCL6863
ORTHOMCL10031	ORTHOMCL5006	ORTHOMCL4789	ORTHOMCL10746	ORTHOMCL10694	ORTHOMCL10792	ORTHOMCL10956	ORTHOMCL4885	ORTHOMCL6247	ORTHOMCL7470
ORTHOMCL10025	ORTHOMCL7657	ORTHOMCL6054	ORTHOMCL10212	ORTHOMCL7515	ORTHOMCL5896	ORTHOMCL10126	ORTHOMCL9058	ORTHOMCL4397	ORTHOMCL9268
ORTHOMCL6564	ORTHOMCL8477	ORTHOMCL7808	ORTHOMCL8173	ORTHOMCL6204	ORTHOMCL5540	ORTHOMCL4980	ORTHOMCL6927	ORTHOMCL6051	ORTHOMCL9642
ORTHOMCL8765	ORTHOMCL6937	ORTHOMCL10579	ORTHOMCL4676	ORTHOMCL7230	ORTHOMCL9552	ORTHOMCL9188	ORTHOMCL9320	ORTHOMCL6505	ORTHOMCL5540
ORTHOMCL9508	ORTHOMCL9703	ORTHOMCL6173	ORTHOMCL10656	ORTHOMCL9913	ORTHOMCL10031	ORTHOMCL7882	ORTHOMCL10633	ORTHOMCL9662	ORTHOMCL6564
ORTHOMCL10663	ORTHOMCL5540	ORTHOMCL6606	ORTHOMCL10467	ORTHOMCL8044	ORTHOMCL10410	ORTHOMCL5262	ORTHOMCL9673	ORTHOMCL9245	ORTHOMCL4818
ORTHOMCL8700	ORTHOMCL8425	ORTHOMCL9476	ORTHOMCL8044	ORTHOMCL7605	ORTHOMCL5388	ORTHOMCL10656	ORTHOMCL8089	ORTHOMCL4448	ORTHOMCL4803
ORTHOMCL10267	ORTHOMCL9491	ORTHOMCL4712	ORTHOMCL5992	ORTHOMCL9771	ORTHOMCL5629	ORTHOMCL6095	ORTHOMCL10147	ORTHOMCL10467	ORTHOMCL5079
ORTHOMCL5031	ORTHOMCL10468	ORTHOMCL9341	ORTHOMCL10475	ORTHOMCL10898	ORTHOMCL9554	ORTHOMCL10430	ORTHOMCL5268	ORTHOMCL10930	ORTHOMCL9058
ORTHOMCL8821	ORTHOMCL10517	ORTHOMCL4753	ORTHOMCL6327	ORTHOMCL7246	ORTHOMCL8917	ORTHOMCL6685	ORTHOMCL9944	ORTHOMCL9901	ORTHOMCL8477
ORTHOMCL6310	ORTHOMCL7561	ORTHOMCL5275	ORTHOMCL10917	ORTHOMCL10458	ORTHOMCL5079	ORTHOMCL8196	ORTHOMCL9525	ORTHOMCL9110	ORTHOMCL6535
ORTHOMCL9525	ORTHOMCL10034	ORTHOMCL10540	ORTHOMCL9946	ORTHOMCL5901	ORTHOMCL4798	ORTHOMCL5456	ORTHOMCL8651	ORTHOMCL5901	ORTHOMCL5183
ORTHOMCL9915	ORTHOMCL4396	ORTHOMCL6614	ORTHOMCL9434	ORTHOMCL8476	ORTHOMCL9268	ORTHOMCL10451	ORTHOMCL10262	ORTHOMCL6204	ORTHOMCL10262
ORTHOMCL7508	ORTHOMCL9121	ORTHOMCL10956	ORTHOMCL6956	ORTHOMCL6505	ORTHOMCL5490	ORTHOMCL8089	ORTHOMCL9304	ORTHOMCL10633	ORTHOMCL8309
ORTHOMCL10772	ORTHOMCL8774	ORTHOMCL7168	ORTHOMCL4524	ORTHOMCL6181	ORTHOMCL10656	ORTHOMCL6706	ORTHOMCL7252	ORTHOMCL8476	ORTHOMCL5478
ORTHOMCL9580	ORTHOMCL9276	ORTHOMCL8817	ORTHOMCL7434	ORTHOMCL8749	ORTHOMCL7605	ORTHOMCL4643	ORTHOMCL9669	ORTHOMCL6685	ORTHOMCL10159
ORTHOMCL4699	ORTHOMCL10368	ORTHOMCL6693	ORTHOMCL9304	ORTHOMCL10468	ORTHOMCL9657	ORTHOMCL10856	ORTHOMCL5298	ORTHOMCL10468	ORTHOMCL10409
ORTHOMCL8173	ORTHOMCL10930	ORTHOMCL4782	ORTHOMCL6366	ORTHOMCL8901	ORTHOMCL10411	ORTHOMCL4806	ORTHOMCL5629	ORTHOMCL9771	ORTHOMCL8005
ORTHOMCL9146	ORTHOMCL9453	ORTHOMCL9580	ORTHOMCL6312	ORTHOMCL10034	ORTHOMCL9236	ORTHOMCL8817	ORTHOMCL5262	ORTHOMCL10501	ORTHOMCL10579
ORTHOMCL6489	ORTHOMCL6956	ORTHOMCL10633	ORTHOMCL9455	ORTHOMCL9104	ORTHOMCL10182	ORTHOMCL7808	ORTHOMCL10929	ORTHOMCL10747	ORTHOMCL9944
ORTHOMCL7515	ORTHOMCL9708	ORTHOMCL7035	ORTHOMCL9657	ORTHOMCL5478	ORTHOMCL10260	ORTHOMCL10625	ORTHOMCL6461	ORTHOMCL6914	ORTHOMCL5020
ORTHOMCL6753	ORTHOMCL9249	ORTHOMCL5120	ORTHOMCL5466	ORTHOMCL6739	ORTHOMCL7511	ORTHOMCL5971	ORTHOMCL10864	ORTHOMCL7113	ORTHOMCL9830
ORTHOMCL10037	ORTHOMCL9612	ORTHOMCL10475	ORTHOMCL7553	ORTHOMCL9456	ORTHOMCL7553	ORTHOMCL9453	ORTHOMCL9993	ORTHOMCL7561	ORTHOMCL4980
ORTHOMCL9268	ORTHOMCL10212	ORTHOMCL4643	ORTHOMCL9188	ORTHOMCL9825	ORTHOMCL6564	ORTHOMCL9669	ORTHOMCL5540	ORTHOMCL10034	ORTHOMCL4663
ORTHOMCL7402	ORTHOMCL10153	ORTHOMCL5796	ORTHOMCL6943	ORTHOMCL10930	ORTHOMCL5672	ORTHOMCL7434	ORTHOMCL8901	ORTHOMCL10694	ORTHOMCL7098
ORTHOMCL4540	ORTHOMCL10929	ORTHOMCL10517	ORTHOMCL9122	ORTHOMCL8700	ORTHOMCL6262	ORTHOMCL4927	ORTHOMCL4515	ORTHOMCL9703	ORTHOMCL8540
ORTHOMCL7300	ORTHOMCL6095	ORTHOMCL9525	ORTHOMCL8774	ORTHOMCL9320	ORTHOMCL4885	ORTHOMCL5626	ORTHOMCL8309	ORTHOMCL9900	ORTHOMCL6946
ORTHOMCL4798	ORTHOMCL6927	ORTHOMCL5691	ORTHOMCL4396	ORTHOMCL10501	ORTHOMCL4982	ORTHOMCL9491	ORTHOMCL5333	ORTHOMCL10625	ORTHOMCL5450
ORTHOMCL9944	ORTHOMCL7441	ORTHOMCL10159	ORTHOMCL5626	ORTHOMCL10212	ORTHOMCL7608	ORTHOMCL9439	ORTHOMCL10956	ORTHOMCL6489	ORTHOMCL10467
ORTHOMCL9178	ORTHOMCL10501	ORTHOMCL4796	ORTHOMCL7750	ORTHOMCL10153	ORTHOMCL5072	ORTHOMCL9923	ORTHOMCL8405	ORTHOMCL6564	ORTHOMCL5309
ORTHOMCL9453	ORTHOMCL10879	ORTHOMCL9020	ORTHOMCL5495	ORTHOMCL7244	ORTHOMCL4616	ORTHOMCL6051	ORTHOMCL10930	ORTHOMCL8112	ORTHOMCL10898
ORTHOMCL10626	ORTHOMCL5120	ORTHOMCL7396	ORTHOMCL9453	ORTHOMCL10368	ORTHOMCL5848	ORTHOMCL6948	ORTHOMCL9552	ORTHOMCL5048	ORTHOMCL5490
ORTHOMCL4463	ORTHOMCL7515	ORTHOMCL9915	ORTHOMCL8329	ORTHOMCL10025	ORTHOMCL10856	ORTHOMCL10346	ORTHOMCL10031	ORTHOMCL4933	ORTHOMCL5137
ORTHOMCL10333	ORTHOMCL4619	ORTHOMCL8694	ORTHOMCL10584	ORTHOMCL9593	ORTHOMCL10956	ORTHOMCL9944	ORTHOMCL6333	ORTHOMCL5418	ORTHOMCL5900
ORTHOMCL10517	ORTHOMCL9320	ORTHOMCL10411	ORTHOMCL10159	ORTHOMCL9830	ORTHOMCL10328	ORTHOMCL10212	ORTHOMCL5275	ORTHOMCL5900	ORTHOMCL4782
ORTHOMCL10999	ORTHOMCL4866	ORTHOMCL9232	ORTHOMCL7230	ORTHOMCL7390	ORTHOMCL4883	ORTHOMCL10694	ORTHOMCL7441	ORTHOMCL4463	ORTHOMCL10534
ORTHOMCL6695	ORTHOMCL9310	ORTHOMCL6150	ORTHOMCL4602	ORTHOMCL9708	ORTHOMCL4589	ORTHOMCL8765	ORTHOMCL10517	ORTHOMCL10409	ORTHOMCL10415
ORTHOMCL5737	ORTHOMCL5382	ORTHOMCL4472	ORTHOMCL6812	ORTHOMCL9236	ORTHOMCL6789	ORTHOMCL8702	ORTHOMCL8074	ORTHOMCL5490	ORTHOMCL9122
ORTHOMCL10796	ORTHOMCL7283	ORTHOMCL6690	ORTHOMCL5901	ORTHOMCL10579	ORTHOMCL10077	ORTHOMCL6204	ORTHOMCL9268	ORTHOMCL4737	ORTHOMCL10260
ORTHOMCL4392	ORTHOMCL4735	ORTHOMCL8998	ORTHOMCL8800	ORTHOMCL6389	ORTHOMCL5615	ORTHOMCL5424	ORTHOMCL6914	ORTHOMCL9944	ORTHOMCL10917
ORTHOMCL9834	ORTHOMCL5023	ORTHOMCL10973	ORTHOMCL8476	ORTHOMCL4818	ORTHOMCL8373	ORTHOMCL9913	ORTHOMCL4712	ORTHOMCL9690	ORTHOMCL10346
ORTHOMCL6002	ORTHOMCL7511	ORTHOMCL6749	ORTHOMCL9690	ORTHOMCL10184	ORTHOMCL9043	ORTHOMCL7252	ORTHOMCL8743	ORTHOMCL5079	ORTHOMCL9439
ORTHOMCL5304	ORTHOMCL8636	ORTHOMCL5090	ORTHOMCL6051	ORTHOMCL4971	ORTHOMCL10147	ORTHOMCL10368	ORTHOMCL10415	ORTHOMCL7590	ORTHOMCL6310
ORTHOMCL8386	ORTHOMCL6693	ORTHOMCL9456	ORTHOMCL5718	ORTHOMCL8967	ORTHOMCL8004	ORTHOMCL10468	ORTHOMCL9708	ORTHOMCL4798	ORTHOMCL9771
ORTHOMCL5120	ORTHOMCL10105	ORTHOMCL8865	ORTHOMCL5057	ORTHOMCL10856	ORTHOMCL7208	ORTHOMCL9124	ORTHOMCL5137	ORTHOMCL10656	ORTHOMCL10034
ORTHOMCL8785	ORTHOMCL4883	ORTHOMCL4742	ORTHOMCL8856	ORTHOMCL9232	ORTHOMCL6347	ORTHOMCL4737	ORTHOMCL7390	ORTHOMCL9341	ORTHOMCL4437
ORTHOMCL10001	ORTHOMCL10260	ORTHOMCL9276	ORTHOMCL9552	ORTHOMCL9642	ORTHOMCL10262	ORTHOMCL10747	ORTHOMCL8540	ORTHOMCL5718	ORTHOMCL9121
ORTHOMCL5396	ORTHOMCL5629	ORTHOMCL8473	ORTHOMCL9771	ORTHOMCL10410	ORTHOMCL5350	ORTHOMCL8694	ORTHOMCL10898	ORTHOMCL8008	ORTHOMCL10411
ORTHOMCL5262	ORTHOMCL9288	ORTHOMCL5928	ORTHOMCL6789	ORTHOMCL7111	ORTHOMCL6095	ORTHOMCL10930	ORTHOMCL5466	ORTHOMCL4735	ORTHOMCL7702
ORTHOMCL9276	ORTHOMCL5691	ORTHOMCL10534	ORTHOMCL8585	ORTHOMCL5629	ORTHOMCL10579	ORTHOMCL9662	ORTHOMCL9453	ORTHOMCL10001	ORTHOMCL6693
ORTHOMCL4960	ORTHOMCL10284	ORTHOMCL10328	ORTHOMCL10803	ORTHOMCL7194	ORTHOMCL5298	ORTHOMCL10034	ORTHOMCL9249	ORTHOMCL4542	ORTHOMCL5317
ORTHOMCL5285	ORTHOMCL6668	ORTHOMCL5350	ORTHOMCL10458	ORTHOMCL9341	ORTHOMCL9374	ORTHOMCL9236	ORTHOMCL10430	ORTHOMCL10328	ORTHOMCL8631
ORTHOMCL8599	ORTHOMCL4885	ORTHOMCL8967	ORTHOMCL8694	ORTHOMCL5304	ORTHOMCL10625	ORTHOMCL10260	ORTHOMCL7913	ORTHOMCL9491	ORTHOMCL9703
ORTHOMCL10917	ORTHOMCL4466	ORTHOMCL6215	ORTHOMCL6863	ORTHOMCL9491	ORTHOMCL5382	ORTHOMCL5589	ORTHOMCL9439	ORTHOMCL9649	ORTHOMCL8636
ORTHOMCL8998	ORTHOMCL10579	ORTHOMCL7283	ORTHOMCL5864	ORTHOMCL5321	ORTHOMCL8998	ORTHOMCL9612	ORTHOMCL6535	ORTHOMCL10159	ORTHOMCL10105
ORTHOMCL10929	ORTHOMCL4392	ORTHOMCL10409	ORTHOMCL10956	ORTHOMCL10956	ORTHOMCL6863	ORTHOMCL10570	ORTHOMCL4980	ORTHOMCL7511	ORTHOMCL10663
ORTHOMCL4883	ORTHOMCL6054	ORTHOMCL10807	ORTHOMCL10105	ORTHOMCL5048	ORTHOMCL4789	ORTHOMCL6505	ORTHOMCL7035	ORTHOMCL5538	ORTHOMCL9721
ORTHOMCL6561	ORTHOMCL10572	ORTHOMCL7747	ORTHOMCL5090	ORTHOMCL4798	ORTHOMCL8257	ORTHOMCL5900	ORTHOMCL8765	ORTHOMCL5540	ORTHOMCL6204
ORTHOMCL5775	ORTHOMCL6854	ORTHOMCL9104	ORTHOMCL7030	ORTHOMCL4735	ORTHOMCL5365	ORTHOMCL8425	ORTHOMCL8425	ORTHOMCL8386	ORTHOMCL10570
ORTHOMCL4803	ORTHOMCL4541	ORTHOMCL6489	ORTHOMCL4803	ORTHOMCL10159	ORTHOMCL8743	ORTHOMCL9915	ORTHOMCL9915	ORTHOMCL9178	ORTHOMCL7278
ORTHOMCL8044	ORTHOMCL10475	ORTHOMCL10153	ORTHOMCL6549	ORTHOMCL10475	ORTHOMCL6181	ORTHOMCL6339	ORTHOMCL5767	ORTHOMCL4396	ORTHOMCL10025
ORTHOMCL5297	ORTHOMCL4616	ORTHOMCL7244	ORTHOMCL4933	ORTHOMCL7475	ORTHOMCL9124	ORTHOMCL6027	ORTHOMCL7561	ORTHOMCL5283	ORTHOMCL9434
ORTHOMCL4818	ORTHOMCL4933	ORTHOMCL4980	ORTHOMCL9721	ORTHOMCL10969	ORTHOMCL10409	ORTHOMCL4933	ORTHOMCL10570	ORTHOMCL9094	ORTHOMCL10930
ORTHOMCL10129	ORTHOMCL9456	ORTHOMCL10346	ORTHOMCL10973	ORTHOMCL5057	ORTHOMCL6461	ORTHOMCL5388	ORTHOMCL9913	ORTHOMCL9734	ORTHOMCL6927
ORTHOMCL9662	ORTHOMCL9642	ORTHOMCL10368	ORTHOMCL10579	ORTHOMCL9188	ORTHOMCL7699	ORTHOMCL7515	ORTHOMCL6051	ORTHOMCL5006	ORTHOMCL7608
ORTHOMCL8605	ORTHOMCL5020	ORTHOMCL6051	ORTHOMCL10153	ORTHOMCL6095	ORTHOMCL8033	ORTHOMCL7113	ORTHOMCL7605	ORTHOMCL9453	ORTHOMCL9913
ORTHOMCL8309	ORTHOMCL4737	ORTHOMCL6956	ORTHOMCL10346	ORTHOMCL6854	ORTHOMCL5809	ORTHOMCL5672	ORTHOMCL6215	ORTHOMCL5382	ORTHOMCL9673
ORTHOMCL10328	ORTHOMCL8998	ORTHOMCL5611	ORTHOMCL9281	ORTHOMCL6690	ORTHOMCL5275	ORTHOMCL7693	ORTHOMCL9771	ORTHOMCL10025	ORTHOMCL8651
ORTHOMCL5350	ORTHOMCL10612	ORTHOMCL8107	ORTHOMCL8058	ORTHOMCL10594	ORTHOMCL6333	ORTHOMCL9734	ORTHOMCL10271	ORTHOMCL6310	ORTHOMCL8702
ORTHOMCL9110	ORTHOMCL4806	ORTHOMCL10898	ORTHOMCL8702	ORTHOMCL10262	ORTHOMCL10973	ORTHOMCL9901	ORTHOMCL8004	ORTHOMCL6164	ORTHOMCL4983
ORTHOMCL4806	ORTHOMCL8901	ORTHOMCL9901	ORTHOMCL9825	ORTHOMCL5268	ORTHOMCL5589	ORTHOMCL7390	ORTHOMCL8636	ORTHOMCL10126	ORTHOMCL8573
ORTHOMCL8573	ORTHOMCL9122	ORTHOMCL5983	ORTHOMCL10570	ORTHOMCL8636	ORTHOMCL7441	ORTHOMCL10969	ORTHOMCL6668	ORTHOMCL7441	ORTHOMCL10694
ORTHOMCL7505	ORTHOMCL5971	ORTHOMCL9703	ORTHOMCL9297	ORTHOMCL6310	ORTHOMCL7240	ORTHOMCL10409	ORTHOMCL5834	ORTHOMCL9923	ORTHOMCL10271
ORTHOMCL4397	ORTHOMCL6789	ORTHOMCL10212	ORTHOMCL9276	ORTHOMCL5381	ORTHOMCL9172	ORTHOMCL5495	ORTHOMCL6204	ORTHOMCL9374	ORTHOMCL7580
ORTHOMCL9374	ORTHOMCL8095	ORTHOMCL6948	ORTHOMCL8967	ORTHOMCL6946	ORTHOMCL10572	ORTHOMCL5317	ORTHOMCL8107	ORTHOMCL10663	ORTHOMCL10451
ORTHOMCL6389	ORTHOMCL4818	ORTHOMCL6505	ORTHOMCL5248	ORTHOMCL7263	ORTHOMCL5262	ORTHOMCL5000	ORTHOMCL10025	ORTHOMCL4713	ORTHOMCL6389
ORTHOMCL4796	ORTHOMCL4971	ORTHOMCL10467	ORTHOMCL9249	ORTHOMCL5397	ORTHOMCL6054	ORTHOMCL7702	ORTHOMCL8865	ORTHOMCL6487	ORTHOMCL8817
ORTHOMCL10813	ORTHOMCL5809	ORTHOMCL10031	ORTHOMCL6339	ORTHOMCL8377	ORTHOMCL4392	ORTHOMCL9771	ORTHOMCL10807	ORTHOMCL8257	ORTHOMCL7561
ORTHOMCL9642	ORTHOMCL9094	ORTHOMCL10468	ORTHOMCL9901	ORTHOMCL8420	ORTHOMCL5786	ORTHOMCL7792	ORTHOMCL10694	ORTHOMCL9947	ORTHOMCL8901
ORTHOMCL9273	ORTHOMCL8869	ORTHOMCL7561	ORTHOMCL10368	ORTHOMCL6685	ORTHOMCL10930	ORTHOMCL8473	ORTHOMCL7515	ORTHOMCL5120	ORTHOMCL9901
ORTHOMCL10388	ORTHOMCL8817	ORTHOMCL9642	ORTHOMCL10501	ORTHOMCL4713	ORTHOMCL5297	ORTHOMCL5321	ORTHOMCL8917	ORTHOMCL5383	ORTHOMCL7390
ORTHOMCL6404	ORTHOMCL7693	ORTHOMCL9708	ORTHOMCL9708	ORTHOMCL10430	ORTHOMCL5466	ORTHOMCL9456	ORTHOMCL10747	ORTHOMCL8173	ORTHOMCL5310
ORTHOMCL7780	ORTHOMCL7608	ORTHOMCL8044	ORTHOMCL6690	ORTHOMCL10105	ORTHOMCL10001	ORTHOMCL10105	ORTHOMCL5672	ORTHOMCL7434	ORTHOMCL9734
ORTHOMCL6813	ORTHOMCL7792	ORTHOMCL8196	ORTHOMCL8947	ORTHOMCL5365	ORTHOMCL8270	ORTHOMCL7514	ORTHOMCL10451	ORTHOMCL8425	ORTHOMCL9585
ORTHOMCL8171	ORTHOMCL6535	ORTHOMCL4933	ORTHOMCL6280	ORTHOMCL5350	ORTHOMCL9456	ORTHOMCL6333	ORTHOMCL8505	ORTHOMCL8270	ORTHOMCL5691
ORTHOMCL9439	ORTHOMCL8822	ORTHOMCL6366	ORTHOMCL10540	ORTHOMCL5538	ORTHOMCL8749	ORTHOMCL9658	ORTHOMCL10973	ORTHOMCL9469	ORTHOMCL4971
ORTHOMCL9137	ORTHOMCL5268	ORTHOMCL10930	ORTHOMCL5079	ORTHOMCL6404	ORTHOMCL5304	ORTHOMCL7263	ORTHOMCL10594	ORTHOMCL10077	ORTHOMCL9236
ORTHOMCL10540	ORTHOMCL6946	ORTHOMCL6204	ORTHOMCL6668	ORTHOMCL10656	ORTHOMCL9993	ORTHOMCL7590	ORTHOMCL9043	ORTHOMCL5672	ORTHOMCL10633
ORTHOMCL8278	ORTHOMCL6215	ORTHOMCL7515	ORTHOMCL4725	ORTHOMCL8309	ORTHOMCL9075	ORTHOMCL9672	ORTHOMCL4663	ORTHOMCL10430	ORTHOMCL5335
ORTHOMCL7702	ORTHOMCL10969	ORTHOMCL5672	ORTHOMCL4713	ORTHOMCL10409	ORTHOMCL9672	ORTHOMCL10184	ORTHOMCL10212	ORTHOMCL6095	ORTHOMCL9669
ORTHOMCL9645	ORTHOMCL8107	ORTHOMCL10105	ORTHOMCL8395	ORTHOMCL8998	ORTHOMCL6614	ORTHOMCL7030	ORTHOMCL5382	ORTHOMCL4616	ORTHOMCL5382
ORTHOMCL5551	ORTHOMCL5962	ORTHOMCL8636	ORTHOMCL7168	ORTHOMCL4589	ORTHOMCL8461	ORTHOMCL10271	ORTHOMCL10856	ORTHOMCL9552	ORTHOMCL10572
ORTHOMCL4817	ORTHOMCL5248	ORTHOMCL9552	ORTHOMCL8816	ORTHOMCL10451	ORTHOMCL7808	ORTHOMCL7608	ORTHOMCL5456	ORTHOMCL6150	ORTHOMCL10468
ORTHOMCL5636	ORTHOMCL7098	ORTHOMCL9771	ORTHOMCL4472	ORTHOMCL7215	ORTHOMCL6946	ORTHOMCL5466	ORTHOMCL5309	ORTHOMCL5424	ORTHOMCL6606
ORTHOMCL4971	ORTHOMCL9734	ORTHOMCL4883	ORTHOMCL4792	ORTHOMCL7294	ORTHOMCL10969	ORTHOMCL5691	ORTHOMCL6789	ORTHOMCL10790	ORTHOMCL9708
ORTHOMCL7856	ORTHOMCL4927	ORTHOMCL5962	ORTHOMCL5275	ORTHOMCL7240	ORTHOMCL6215	ORTHOMCL8967	ORTHOMCL4536	ORTHOMCL5572	ORTHOMCL10031
ORTHOMCL5836	ORTHOMCL4796	ORTHOMCL9662	ORTHOMCL5971	ORTHOMCL10625	ORTHOMCL7475	ORTHOMCL8107	ORTHOMCL4835	ORTHOMCL7913	ORTHOMCL10212
ORTHOMCL8330	ORTHOMCL5478	ORTHOMCL9913	ORTHOMCL10633	ORTHOMCL8079	ORTHOMCL9537	ORTHOMCL9947	ORTHOMCL9946	ORTHOMCL8998	ORTHOMCL10856
ORTHOMCL4496	ORTHOMCL4980	ORTHOMCL10430	ORTHOMCL4753	ORTHOMCL9525	ORTHOMCL9341	ORTHOMCL8901	ORTHOMCL9172	ORTHOMCL8856	ORTHOMCL10807
ORTHOMCL9383	ORTHOMCL5275	ORTHOMCL10570	ORTHOMCL10517	ORTHOMCL5572	ORTHOMCL7913	ORTHOMCL9341	ORTHOMCL4424	ORTHOMCL8620	ORTHOMCL10969
ORTHOMCL9669	ORTHOMCL6404	ORTHOMCL9320	ORTHOMCL9456	ORTHOMCL7208	ORTHOMCL8107	ORTHOMCL10147	ORTHOMCL9734	ORTHOMCL6614	ORTHOMCL10792
ORTHOMCL5333	ORTHOMCL8573	ORTHOMCL9110	ORTHOMCL10807	ORTHOMCL10227	ORTHOMCL6898	ORTHOMCL6002	ORTHOMCL4390	ORTHOMCL10746	ORTHOMCL7693
ORTHOMCL4777	ORTHOMCL10625	ORTHOMCL8373	ORTHOMCL10679	ORTHOMCL6668	ORTHOMCL4542	ORTHOMCL8749	ORTHOMCL9658	ORTHOMCL10917	ORTHOMCL8270
ORTHOMCL10835	ORTHOMCL9993	ORTHOMCL5079	ORTHOMCL10856	ORTHOMCL5137	ORTHOMCL6798	ORTHOMCL5020	ORTHOMCL7511	ORTHOMCL6706	ORTHOMCL10973
ORTHOMCL5718	ORTHOMCL5317	ORTHOMCL6404	ORTHOMCL9469	ORTHOMCL8817	ORTHOMCL5792	ORTHOMCL5775	ORTHOMCL5321	ORTHOMCL8636	ORTHOMCL5000
ORTHOMCL8217	ORTHOMCL10663	ORTHOMCL4818	ORTHOMCL10468	ORTHOMCL10973	ORTHOMCL9642	ORTHOMCL7230	ORTHOMCL10077	ORTHOMCL10969	ORTHOMCL10227
ORTHOMCL10619	ORTHOMCL6911	ORTHOMCL5317	ORTHOMCL5538	ORTHOMCL10534	ORTHOMCL7030	ORTHOMCL10159	ORTHOMCL5424	ORTHOMCL10879	ORTHOMCL7514
ORTHOMCL5997	ORTHOMCL9236	ORTHOMCL8004	ORTHOMCL9491	ORTHOMCL4541	ORTHOMCL5450	ORTHOMCL6564	ORTHOMCL8270	ORTHOMCL5427	ORTHOMCL5775
ORTHOMCL5466	ORTHOMCL8278	ORTHOMCL9058	ORTHOMCL9286	ORTHOMCL8270	ORTHOMCL5418	ORTHOMCL4416	ORTHOMCL9657	ORTHOMCL5309	ORTHOMCL5424
ORTHOMCL7858	ORTHOMCL5262	ORTHOMCL8173	ORTHOMCL6404	ORTHOMCL10879	ORTHOMCL4775	ORTHOMCL10633	ORTHOMCL7280	ORTHOMCL6690	ORTHOMCL8257
ORTHOMCL10746	ORTHOMCL10031	ORTHOMCL9054	ORTHOMCL5848	ORTHOMCL7035	ORTHOMCL7098	ORTHOMCL4676	ORTHOMCL7470	ORTHOMCL10517	ORTHOMCL5971
ORTHOMCL7441	ORTHOMCL7246	ORTHOMCL10415	ORTHOMCL8005	ORTHOMCL10572	ORTHOMCL7194	ORTHOMCL7424	ORTHOMCL4866	ORTHOMCL10570	ORTHOMCL8765
ORTHOMCL9045	ORTHOMCL10633	ORTHOMCL10594	ORTHOMCL8736	ORTHOMCL9946	ORTHOMCL4971	ORTHOMCL9310	ORTHOMCL4796	ORTHOMCL7736	ORTHOMCL5834
ORTHOMCL10354	ORTHOMCL10409	ORTHOMCL6333	ORTHOMCL4712	ORTHOMCL8477	ORTHOMCL6749	ORTHOMCL5786	ORTHOMCL9456	ORTHOMCL6339	ORTHOMCL6312
ORTHOMCL6065	ORTHOMCL6564	ORTHOMCL6310	ORTHOMCL10663	ORTHOMCL8373	ORTHOMCL8771	ORTHOMCL9122	ORTHOMCL10969	ORTHOMCL9604	ORTHOMCL7424
ORTHOMCL7806	ORTHOMCL9525	ORTHOMCL5490	ORTHOMCL8433	ORTHOMCL6461	ORTHOMCL9605	ORTHOMCL5297	ORTHOMCL6532	ORTHOMCL6428	ORTHOMCL8822
ORTHOMCL5397	ORTHOMCL7035	ORTHOMCL8749	ORTHOMCL8836	ORTHOMCL5611	ORTHOMCL4737	ORTHOMCL4803	ORTHOMCL5786	ORTHOMCL5848	ORTHOMCL4480
ORTHOMCL5887	ORTHOMCL10973	ORTHOMCL5365	ORTHOMCL10126	ORTHOMCL7441	ORTHOMCL7168	ORTHOMCL9121	ORTHOMCL10656	ORTHOMCL7470	ORTHOMCL9320
ORTHOMCL10807	ORTHOMCL8004	ORTHOMCL5072	ORTHOMCL9236	ORTHOMCL8774	ORTHOMCL8822	ORTHOMCL9094	ORTHOMCL5971	ORTHOMCL8318	ORTHOMCL5626
ORTHOMCL9734	ORTHOMCL5896	ORTHOMCL8270	ORTHOMCL9658	ORTHOMCL10001	ORTHOMCL10525	ORTHOMCL8651	ORTHOMCL8822	ORTHOMCL7808	ORTHOMCL7913
ORTHOMCL9369	ORTHOMCL6685	ORTHOMCL6937	ORTHOMCL5775	ORTHOMCL4933	ORTHOMCL6004	ORTHOMCL5268	ORTHOMCL9604	ORTHOMCL5629	ORTHOMCL7882
ORTHOMCL4792	ORTHOMCL8765	ORTHOMCL8461	ORTHOMCL10929	ORTHOMCL9657	ORTHOMCL8309	ORTHOMCL8005	ORTHOMCL7554	ORTHOMCL10262	ORTHOMCL9310
ORTHOMCL10453	ORTHOMCL7171	ORTHOMCL10792	ORTHOMCL5310	ORTHOMCL8605	ORTHOMCL6914	ORTHOMCL5120	ORTHOMCL6898	ORTHOMCL9830	ORTHOMCL8584
ORTHOMCL5310	ORTHOMCL10790	ORTHOMCL9672	ORTHOMCL10969	ORTHOMCL8074	ORTHOMCL8005	ORTHOMCL10124	ORTHOMCL6093	ORTHOMCL10184	ORTHOMCL6173
ORTHOMCL5972	ORTHOMCL7240	ORTHOMCL5786	ORTHOMCL10572	ORTHOMCL8196	ORTHOMCL5800	ORTHOMCL10579	ORTHOMCL4792	ORTHOMCL8507	ORTHOMCL6366
ORTHOMCL6461	ORTHOMCL7553	ORTHOMCL6145	ORTHOMCL7608	ORTHOMCL8107	ORTHOMCL7064	ORTHOMCL8774	ORTHOMCL8033	ORTHOMCL4768	ORTHOMCL7283
ORTHOMCL9537	ORTHOMCL6333	ORTHOMCL8425	ORTHOMCL5424	ORTHOMCL9923	ORTHOMCL10694	ORTHOMCL7194	ORTHOMCL9642	ORTHOMCL6863	ORTHOMCL10185
ORTHOMCL9094	ORTHOMCL5786	ORTHOMCL4392	ORTHOMCL7913	ORTHOMCL5767	ORTHOMCL6389	ORTHOMCL9946	ORTHOMCL6339	ORTHOMCL10562	ORTHOMCL10475
ORTHOMCL8518	ORTHOMCL10328	ORTHOMCL5809	ORTHOMCL8107	ORTHOMCL9217	ORTHOMCL9604	ORTHOMCL7412	ORTHOMCL10184	ORTHOMCL5771	ORTHOMCL9604
ORTHOMCL6804	ORTHOMCL6461	ORTHOMCL7554	ORTHOMCL6606	ORTHOMCL4676	ORTHOMCL5775	ORTHOMCL6145	ORTHOMCL6173	ORTHOMCL9124	ORTHOMCL6035
ORTHOMCL5247	ORTHOMCL5090	ORTHOMCL7030	ORTHOMCL10031	ORTHOMCL5848	ORTHOMCL9525	ORTHOMCL10337	ORTHOMCL8473	ORTHOMCL4904	ORTHOMCL8916
ORTHOMCL10846	ORTHOMCL5381	ORTHOMCL10856	ORTHOMCL10163	ORTHOMCL8973	ORTHOMCL5310	ORTHOMCL5093	ORTHOMCL5775	ORTHOMCL6312	ORTHOMCL10746
ORTHOMCL9231	ORTHOMCL10856	ORTHOMCL10746	ORTHOMCL9232	ORTHOMCL7300	ORTHOMCL7554	ORTHOMCL10594	ORTHOMCL5020	ORTHOMCL8651	ORTHOMCL10594
ORTHOMCL7605	ORTHOMCL6606	ORTHOMCL6927	ORTHOMCL10898	ORTHOMCL8765	ORTHOMCL9058	ORTHOMCL8505	ORTHOMCL6854	ORTHOMCL6181	ORTHOMCL7240
ORTHOMCL10405	ORTHOMCL9172	ORTHOMCL9121	ORTHOMCL5629	ORTHOMCL6749	ORTHOMCL8276	ORTHOMCL10879	ORTHOMCL7412	ORTHOMCL6404	ORTHOMCL5456
ORTHOMCL7975	ORTHOMCL9341	ORTHOMCL8785	ORTHOMCL9374	ORTHOMCL8771	ORTHOMCL9901	ORTHOMCL6606	ORTHOMCL4392	ORTHOMCL10260	ORTHOMCL9813
ORTHOMCL4681	ORTHOMCL9104	ORTHOMCL6035	ORTHOMCL9604	ORTHOMCL5090	ORTHOMCL6854	ORTHOMCL10453	ORTHOMCL9825	ORTHOMCL10512	ORTHOMCL5786
ORTHOMCL6854	ORTHOMCL7280	ORTHOMCL9657	ORTHOMCL7278	ORTHOMCL7278	ORTHOMCL10227	ORTHOMCL5629	ORTHOMCL9923	ORTHOMCL7781	ORTHOMCL9104
ORTHOMCL4735	ORTHOMCL6145	ORTHOMCL6946	ORTHOMCL6564	ORTHOMCL8816	ORTHOMCL8429	ORTHOMCL9075	ORTHOMCL5381	ORTHOMCL5374	ORTHOMCL5381
ORTHOMCL9825	ORTHOMCL8651	ORTHOMCL9374	ORTHOMCL6150	ORTHOMCL9058	ORTHOMCL5397	ORTHOMCL10898	ORTHOMCL9721	ORTHOMCL5992	ORTHOMCL4392
ORTHOMCL9204	ORTHOMCL8270	ORTHOMCL9604	ORTHOMCL8377	ORTHOMCL9172	ORTHOMCL10475	ORTHOMCL10929	ORTHOMCL4713	ORTHOMCL6927	ORTHOMCL4933
ORTHOMCL6322	ORTHOMCL8473	ORTHOMCL10663	ORTHOMCL10411	ORTHOMCL5310	ORTHOMCL10453	ORTHOMCL7466	ORTHOMCL5809	ORTHOMCL5275	ORTHOMCL6215
ORTHOMCL8995	ORTHOMCL9947	ORTHOMCL8651	ORTHOMCL10328	ORTHOMCL7608	ORTHOMCL5335	ORTHOMCL5248	ORTHOMCL10458	ORTHOMCL10388	ORTHOMCL7194
ORTHOMCL6668	ORTHOMCL10525	ORTHOMCL5321	ORTHOMCL10747	ORTHOMCL7699	ORTHOMCL10807	ORTHOMCL6532	ORTHOMCL5332	ORTHOMCL7263	ORTHOMCL6051
ORTHOMCL9249	ORTHOMCL6310	ORTHOMCL8074	ORTHOMCL9075	ORTHOMCL10663	ORTHOMCL5090	ORTHOMCL6693	ORTHOMCL8702	ORTHOMCL5745	ORTHOMCL7230
ORTHOMCL9354	ORTHOMCL9604	ORTHOMCL7608	ORTHOMCL5896	ORTHOMCL7029	ORTHOMCL10594	ORTHOMCL9058	ORTHOMCL9965	ORTHOMCL9915	ORTHOMCL10525
ORTHOMCL10594	ORTHOMCL7424	ORTHOMCL10184	ORTHOMCL6927	ORTHOMCL10835	ORTHOMCL7280	ORTHOMCL4796	ORTHOMCL9341	ORTHOMCL6454	ORTHOMCL10388
ORTHOMCL7792	ORTHOMCL8749	ORTHOMCL5000	ORTHOMCL8026	ORTHOMCL4643	ORTHOMCL8967	ORTHOMCL7554	ORTHOMCL10715	ORTHOMCL6333	ORTHOMCL7832
ORTHOMCL9564	ORTHOMCL6898	ORTHOMCL8309	ORTHOMCL10925	ORTHOMCL4396	ORTHOMCL6404	ORTHOMCL8092	ORTHOMCL9662	ORTHOMCL4999	ORTHOMCL6461
ORTHOMCL10525	ORTHOMCL7230	ORTHOMCL9503	ORTHOMCL8573	ORTHOMCL10746	ORTHOMCL10468	ORTHOMCL6004	ORTHOMCL7608	ORTHOMCL6693	ORTHOMCL6505
ORTHOMCL10973	ORTHOMCL8433	ORTHOMCL6564	ORTHOMCL9146	ORTHOMCL7808	ORTHOMCL8651	ORTHOMCL10475	ORTHOMCL5800	ORTHOMCL9054	ORTHOMCL8026
ORTHOMCL7580	ORTHOMCL5350	ORTHOMCL8901	ORTHOMCL9043	ORTHOMCL8257	ORTHOMCL5374	ORTHOMCL7098	ORTHOMCL10746	ORTHOMCL10898	ORTHOMCL9456
ORTHOMCL9649	ORTHOMCL7208	ORTHOMCL7171	ORTHOMCL6898	ORTHOMCL10411	ORTHOMCL4768	ORTHOMCL8276	ORTHOMCL6706	ORTHOMCL6789	ORTHOMCL10956
ORTHOMCL10085	ORTHOMCL8173	ORTHOMCL5456	ORTHOMCL8749	ORTHOMCL7944	ORTHOMCL8817	ORTHOMCL9708	ORTHOMCL4883	ORTHOMCL10337	ORTHOMCL6126
ORTHOMCL5381	ORTHOMCL6705	ORTHOMCL9122	ORTHOMCL8119	ORTHOMCL5809	ORTHOMCL9020	ORTHOMCL7300	ORTHOMCL5893	ORTHOMCL6668	ORTHOMCL5275
ORTHOMCL9445	ORTHOMCL6487	ORTHOMCL7913	ORTHOMCL4796	ORTHOMCL8584	ORTHOMCL7538	ORTHOMCL8079	ORTHOMCL7792	ORTHOMCL5786	ORTHOMCL9825
ORTHOMCL8257	ORTHOMCL6532	ORTHOMCL4424	ORTHOMCL5268	ORTHOMCL6914	ORTHOMCL5626	ORTHOMCL6366	ORTHOMCL5397	ORTHOMCL10594	ORTHOMCL5383
ORTHOMCL4542	ORTHOMCL5057	ORTHOMCL8573	ORTHOMCL9830	ORTHOMCL5800	ORTHOMCL9110	ORTHOMCL6150	ORTHOMCL5626	ORTHOMCL4424	ORTHOMCL10184
ORTHOMCL7068	ORTHOMCL10792	ORTHOMCL8123	ORTHOMCL6171	ORTHOMCL7470	ORTHOMCL6173	ORTHOMCL9374	ORTHOMCL5792	ORTHOMCL10212	ORTHOMCL6262
ORTHOMCL7651	ORTHOMCL5719	ORTHOMCL6278	ORTHOMCL9673	ORTHOMCL5297	ORTHOMCL8173	ORTHOMCL8605	ORTHOMCL5079	ORTHOMCL6739	ORTHOMCL8496
ORTHOMCL10738	ORTHOMCL9830	ORTHOMCL7944	ORTHOMCL4466	ORTHOMCL6035	ORTHOMCL5381	ORTHOMCL8998	ORTHOMCL9476	ORTHOMCL5775	ORTHOMCL8107
ORTHOMCL10159	ORTHOMCL5297	ORTHOMCL6181	ORTHOMCL8270	ORTHOMCL9559	ORTHOMCL9104	ORTHOMCL7168	ORTHOMCL8507	ORTHOMCL10925	ORTHOMCL7030
ORTHOMCL8058	ORTHOMCL10807	ORTHOMCL10388	ORTHOMCL10903	ORTHOMCL7098	ORTHOMCL6280		ORTHOMCL10468	ORTHOMCL10534	ORTHOMCL8074
ORTHOMCL7111	ORTHOMCL5626	ORTHOMCL7424	ORTHOMCL8540	ORTHOMCL6927			ORTHOMCL6347	ORTHOMCL5020	ORTHOMCL9476
ORTHOMCL6312	ORTHOMCL7064	ORTHOMCL6280	ORTHOMCL10415				ORTHOMCL7702	ORTHOMCL6262	ORTHOMCL5120
ORTHOMCL9690	ORTHOMCL7294	ORTHOMCL5718	ORTHOMCL6347				ORTHOMCL10792	ORTHOMCL7466	ORTHOMCL10790
ORTHOMCL5900		ORTHOMCL8079	ORTHOMCL6614				ORTHOMCL9121	ORTHOMCL10124	ORTHOMCL7569
ORTHOMCL9245		ORTHOMCL7781	ORTHOMCL10525				ORTHOMCL10159	ORTHOMCL8496	ORTHOMCL5321
ORTHOMCL10483		ORTHOMCL4806	ORTHOMCL9121				ORTHOMCL8817	ORTHOMCL8278	ORTHOMCL6956
ORTHOMCL9297		ORTHOMCL8276	ORTHOMCL9298				ORTHOMCL5335	ORTHOMCL10415	ORTHOMCL6706
ORTHOMCL4888		ORTHOMCL8278	ORTHOMCL4742				ORTHOMCL4518	ORTHOMCL8373	ORTHOMCL7792
ORTHOMCL9310			ORTHOMCL5809				ORTHOMCL10572	ORTHOMCL7608	ORTHOMCL8995
ORTHOMCL5427			ORTHOMCL4515				ORTHOMCL6404	ORTHOMCL4572	ORTHOMCL7208
ORTHOMCL8176			ORTHOMCL10337				ORTHOMCL7808	ORTHOMCL10227	ORTHOMCL6454
ORTHOMCL8630			ORTHOMCL10792					ORTHOMCL10540	ORTHOMCL6685
ORTHOMCL8815								ORTHOMCL5262	ORTHOMCL5572
ORTHOMCL8543								ORTHOMCL4918	ORTHOMCL9341
ORTHOMCL7263								ORTHOMCL10105	ORTHOMCL7798
ORTHOMCL5198								ORTHOMCL4818	ORTHOMCL6095
ORTHOMCL8433									ORTHOMCL10124
ORTHOMCL9136									ORTHOMCL8658
ORTHOMCL10430

## Sheet: B
Common genes for primer design
ORTHOMCL8765
ORTHOMCL9669
ORTHOMCL7553
ORTHOMCL10525
ORTHOMCL7384
ORTHOMCL10458
ORTHOMCL6347
ORTHOMCL10031
ORTHOMCL6164
ORTHOMCL8817
ORTHOMCL8573
ORTHOMCL6404
ORTHOMCL9110
ORTHOMCL7030
ORTHOMCL5350
ORTHOMCL10468
ORTHOMCL4643
ORTHOMCL8651
ORTHOMCL8771
ORTHOMCL10430
ORTHOMCL8901
ORTHOMCL8026
ORTHOMCL9825
ORTHOMCL5629
ORTHOMCL5691
ORTHOMCL6051
ORTHOMCL9946
ORTHOMCL7470
ORTHOMCL10388
ORTHOMCL9434
ORTHOMCL10153
ORTHOMCL4536
ORTHOMCL9249
ORTHOMCL4918
ORTHOMCL6606
ORTHOMCL5310
ORTHOMCL4424
ORTHOMCL9703
ORTHOMCL4712
ORTHOMCL10346
ORTHOMCL9124
ORTHOMCL7441
ORTHOMCL6532
ORTHOMCL5397
ORTHOMCL4392
ORTHOMCL6150
ORTHOMCL7702
ORTHOMCL8058
ORTHOMCL9721
ORTHOMCL8278
ORTHOMCL9552
ORTHOMCL6706
ORTHOMCL6749
ORTHOMCL10159
ORTHOMCL5427
ORTHOMCL6093
ORTHOMCL9525
ORTHOMCL6505
ORTHOMCL6854
ORTHOMCL5120
ORTHOMCL5718
ORTHOMCL4883
ORTHOMCL4619
ORTHOMCL10898
ORTHOMCL8694
ORTHOMCL7608
ORTHOMCL8196
ORTHOMCL8079
ORTHOMCL10656
ORTHOMCL8044
ORTHOMCL7168
ORTHOMCL8309
ORTHOMCL9734
ORTHOMCL10337
ORTHOMCL10025
ORTHOMCL5020
ORTHOMCL4971
ORTHOMCL5297
ORTHOMCL5775
ORTHOMCL5672
ORTHOMCL10517
ORTHOMCL10328
ORTHOMCL4463
ORTHOMCL5900
ORTHOMCL9453
ORTHOMCL5381
ORTHOMCL9915
ORTHOMCL9146
ORTHOMCL6333
ORTHOMCL6312
ORTHOMCL10956
ORTHOMCL4885
ORTHOMCL9673
ORTHOMCL9657
ORTHOMCL9642
ORTHOMCL4796
ORTHOMCL9771
ORTHOMCL6204
ORTHOMCL5466
ORTHOMCL9690
ORTHOMCL10594
ORTHOMCL8208
ORTHOMCL6863
ORTHOMCL6389
ORTHOMCL8479
ORTHOMCL5304
ORTHOMCL5275
ORTHOMCL7515
ORTHOMCL9662
ORTHOMCL6564
